# Supplementary material for: An Improved Power Quality Disturbance Detection Using Deep Learning Approach
Source: Hindawi journal article supplement (doi:10.1155/2022/7020979), 2022-05-21
Supplement: f1 [file 7020979.f1.zip]

Archive with 4 entries (4 files):
- 7020979.f1/x20db_test.txt
- 7020979.f1/x30db_test.txt
- 7020979.f1/x40db_test.txt
- 7020979.f1/xodb_test.txt
