# Supplementary material for: An Improved Power Quality Disturbance Detection Using Deep Learning Approach
Source: Hindawi journal article supplement (doi:10.1155/2022/7020979), 2022-05-21
Supplement: f1 [file 7020979.f1.zip › 7020979.f1/x20db_test.txt]

0.063878444	0.096761827	0.279460092	0.399167873	0.499301798	0.610307213	0.583380999	0.705394255	0.782571995	0.93334556	0.847214285	0.880064422	1.009452189	0.977884297	1.006188408	0.985302285	1.015242759	0.961409383	1.065515213	0.944141969	0.896059448	0.777938842	0.809949647	0.776549657	0.611277885	0.571253782	0.485213916	0.375892803	0.320597598	0.25061022	0.086691976	0.00916444	-0.122569814	-0.182514846	-0.318739356	-0.326129657	-0.534266034	-0.611743796	-0.637168114	-0.71811883	-0.785445623	-0.799247591	-0.829939613	-0.827264485	-1.081913498	-0.954095395	-0.994379637	-0.988312488	-0.940791969	-0.985821744
0.089104704	0.262859606	0.388137854	0.416873779	0.443996714	0.587887796	0.629582685	0.613557021	0.836476618	0.800531414	0.818901694	0.965840254	0.868061591	0.960964817	0.967626974	0.986420364	1.093722008	1.026056838	0.978974411	0.895200904	0.998980269	0.754886879	0.751874898	0.680010172	0.603960405	0.577213597	0.510305704	0.47983694	0.284300294	0.227659367	0.083130995	-0.057646261	-0.075867238	-0.288781491	-0.308843418	-0.435604265	-0.448032302	-0.557811765	-0.694201086	-0.755201032	-0.765982985	-0.795520237	-0.832227418	-0.881207237	-0.99344127	-1.034981877	-0.95144505	-1.018140657	-0.947267781	-1.049865919
0.045302154	0.184012731	0.225475712	0.420469644	0.479844399	0.599831723	0.619085176	0.693274574	0.917681465	0.811776747	0.906800847	1.040415534	1.017224144	0.947617559	0.989283662	0.998412628	1.011280778	1.013145534	1.059090586	0.946735958	0.862743373	0.898877356	0.818239058	0.727021109	0.552747405	0.605784218	0.537808021	0.391719389	0.304569238	0.200965066	0.101057357	0.057446386	-0.076928582	-0.161504921	-0.29499118	-0.29166305	-0.520981733	-0.49832527	-0.601122976	-0.722612218	-0.71898918	-0.848705905	-0.99388803	-1.016465933	-0.964225819	-1.045072713	-1.026345094	-0.908498158	-0.96135695	-0.933912993
0.07801257	0.056010739	0.502413041	0.333622494	0.401172518	0.643674883	0.875580931	0.541027426	0.89387768	0.839167106	0.742603093	0.942716864	0.976436859	1.134396362	1.040726874	1.163944403	1.028489792	0.716194732	0.83183042	1.028390516	0.761325658	0.730380261	0.670714833	0.62627332	0.745957652	0.593324208	0.476156971	0.427680464	0.308073451	0.261732372	0.218515513	-0.017118543	-0.046147404	-0.103168527	-0.323126062	-0.147849876	-0.469249438	-0.413824907	-0.662135494	-0.778281719	-1.044064241	-0.812061839	-0.845325558	-0.980923965	-1.213238299	-0.873777122	-1.066583126	-1.253826429	-1.120958137	-1.154388969
0.031064189	0.228160126	0.285299831	0.454910785	0.476663369	0.547912745	0.812089283	0.749252938	0.7675869	0.831600008	0.929594939	0.970895206	1.068147575	0.9743757	0.875102568	0.996029112	0.931895601	1.038283609	1.063722861	0.847109639	0.967956741	0.882982744	0.845996584	0.799735919	0.708803209	0.646650213	0.520011741	0.458731116	0.263652181	0.218380137	0.069357198	-0.086788469	-0.111217006	-0.174304001	-0.245980544	-0.493797515	-0.332327408	-0.592955773	-0.723644601	-0.721296271	-0.85832331	-0.885180645	-1.068710724	-0.950582321	-1.065414863	-1.105430299	-1.159054864	-1.001956555	-1.155335542	-1.179640784
0.057521381	0.101095598	0.308162588	0.354895553	0.485007826	0.525828067	0.640273683	0.667531546	0.721926841	0.877091752	0.916687359	0.893100271	0.970862067	0.915665689	0.927880629	1.153470343	1.011563391	1.001546915	0.986972933	0.9245425	0.776860988	0.704014994	0.719668925	0.653630106	0.667645911	0.544314672	0.489851816	0.453343206	0.314813332	0.224903789	-0.060147001	0.159142106	-0.146355764	-0.334095271	-0.312011886	-0.319050297	-0.483334596	-0.625399312	-0.778514169	-0.752142503	-0.763002161	-0.81323626	-0.979893981	-1.060038382	-1.139087928	-0.892082054	-0.994839243	-1.061957256	-0.952865046	-0.976171061
0.136519309	0.26049882	0.373031698	0.35863628	0.52966041	0.596857709	0.629477472	0.768129415	0.819360575	0.925509361	0.899717179	0.92473908	0.893305676	0.953278023	1.001643908	1.016124957	0.959645266	0.95679225	1.00570048	1.023094952	0.940630639	0.776279504	0.716201721	0.577065082	0.289566987	0.551212467	0.448148767	0.347691013	0.162223951	0.254202477	0.114036594	-0.005579563	-0.049599688	-0.239061503	-0.292598465	-0.410499628	-0.471055148	-0.622509388	-0.617376789	-0.684111666	-0.815938548	-0.947563123	-0.805930745	-0.937962346	-0.983718156	-1.065558513	-1.039538616	-0.857596355	-0.877037782	-0.97952205
0.219519072	0.378814742	0.499398089	0.630665751	0.717667482	0.436947927	0.543381407	0.562070709	0.738347144	0.812253159	0.868882348	0.827056617	0.982195996	0.798235305	0.841906413	0.835111561	0.847907042	0.963840383	0.934518469	0.866093029	0.892019652	0.782914767	0.685927555	0.585104632	0.522360899	0.614553837	0.602396155	0.613780137	0.658194504	0.615199957	0.094876641	-0.104789108	-0.239560105	-0.426109985	-0.545149462	-0.563326543	-0.580492534	-0.635015701	-0.567776475	-0.672316318	-0.674755135	-0.804495598	-0.926670881	-0.917499986	-0.857504597	-1.001767953	-0.83701128	-0.818018327	-0.78971602	-1.080955544
0.176662396	0.183710653	0.3462517	0.377082195	0.402046597	0.599259224	0.519318503	0.797040704	0.754300254	0.856939564	0.952543878	0.901998124	0.911308842	0.948617973	0.983328208	0.91617726	1.035248316	0.984166213	0.723141004	0.927602161	0.957733818	0.897954526	0.811469246	0.722809699	0.61155204	0.639837731	0.447615673	0.311870431	0.286165772	0.124456554	0.204415457	0.098437492	-0.147733148	-0.21449597	-0.19835297	-0.447386277	-0.409464582	-0.566035094	-0.548681955	-0.660495429	-0.7587406	-0.809234038	-0.898093505	-0.90824936	-0.93752853	-1.115041215	-0.941282111	-0.976446239	-0.998959824	-0.984966346
0.09352592	0.172553972	0.501720439	0.357529923	0.57888483	0.428431501	0.702629402	0.590204227	0.688544195	0.861166063	0.807695049	0.913783102	0.99870051	1.083475916	1.044586029	0.950611975	0.974978506	0.85732177	1.061738929	0.88477656	0.90752075	0.799208741	0.837074231	0.662270943	0.570818864	0.499270143	0.465971402	0.396562735	0.276079324	0.208146998	0.136118451	0.057919065	-0.147474115	-0.160580706	-0.340035899	-0.408479844	-0.422306629	-0.557837642	-0.633549106	-0.629947684	-0.838240562	-1.021049619	-0.866005087	-0.873625903	-0.926174827	-1.065971849	-0.749152662	-1.002327733	-0.939021987	-0.929018851
0.111232998	-0.00355949	0.197768061	0.365596851	0.438007696	0.640697532	0.74103262	0.722131515	0.698529098	0.914126993	0.957192053	0.841471913	0.87608974	0.849189645	1.048993041	1.069856874	0.980186494	0.904632873	0.951257119	0.848394528	0.921322841	0.885386139	0.781764269	0.792969061	0.705360591	0.460537806	0.358038723	0.403492561	0.363125821	0.095426439	0.103303986	0.055140039	-0.159542112	-0.24319445	-0.317251973	-0.538834412	-0.444015086	-0.596607701	-0.630141337	-0.640714503	-0.991392918	-1.008194715	-0.856706241	-0.834130917	-0.974935586	-1.087009219	-0.902991507	-1.136784531	-0.91599073	-0.893697645
0.192979883	0.269012321	0.280965694	0.369151609	0.512872495	0.604689024	0.667913283	0.619397373	0.703031871	0.961620573	0.948023385	1.003444363	0.993205881	1.088470469	1.014889693	1.050916251	1.066623267	0.780065483	0.984568621	1.094639749	1.060764326	0.799645204	0.933543283	0.803994224	0.649257375	0.601408393	0.526146791	0.419939123	0.110938602	0.134291715	0.099522554	-0.080885585	-0.076985344	-0.155747125	-0.361388698	-0.324765964	-0.529942945	-0.602869063	-0.654676037	-0.685021032	-0.707441678	-0.841789891	-0.935191249	-1.086921123	-1.023420559	-1.029855903	-1.064586689	-1.074645544	-1.113946212	-0.997221648
0.019442709	0.197463826	0.372876616	0.484753617	0.517379216	0.537061994	0.48816386	0.390196432	0.111369824	0.005972176	0.015603207	0.144427402	0.258500087	0.41770493	0.53221935	0.596874268	0.574715477	0.442259507	0.280274469	0.096806758	0.031224661	0.084244241	0.187112958	0.312081652	0.409783919	0.572783019	0.565838305	0.493113385	0.402030903	0.228149319	0.033242079	0.057105077	-0.117690882	-0.209428679	-0.328643206	-0.548105393	-0.513896119	-0.569704017	-0.561460629	-0.310874058	-0.156860152	-0.021674472	0.002655133	-0.094155821	-0.27017821	-0.426487832	-0.552397216	-0.610032784	-0.55649517	-0.439083436
-0.003790029	0.249866339	0.335835185	0.456739647	0.519983623	0.501359115	0.354504608	0.186226636	0.056222223	0.190685946	0.255024892	0.098444175	0.035564536	0.141057916	0.230100946	0.380989299	0.2378413	0.189466162	-0.052336716	0.195280006	0.188247826	0.200897639	0.083890205	0.110489971	0.318724294	0.566754686	0.605457157	0.44255932	0.283885144	0.23122353	0.056612993	0.051226785	-0.1266403	-0.156471369	-0.366991199	-0.527315235	-0.602823262	-0.536406834	-0.382886719	-0.16983184	-0.091088249	-0.237808418	-0.258118915	-0.157155471	-0.055831204	-0.172105598	-0.305096292	-0.294744045	-0.299294618	-0.139820153
0.062824726	0.119792346	0.334220705	0.426396029	0.399025177	0.555590848	0.636292906	0.686609776	0.835699496	0.818097534	0.919208383	1.016325729	0.899712759	1.013057873	0.997406696	1.027161686	0.925384766	0.981810076	0.994276204	0.91270697	0.897238758	0.795757603	0.728504988	0.729701397	0.625232755	0.471689207	0.438908254	0.407031276	0.260774552	0.2338145	0.012859918	0.042871795	-0.128013963	-0.240056053	-0.303029816	-0.266390755	-0.407571452	-0.611217425	-0.670043249	-0.634425298	-0.770087181	-0.855538951	-0.836532503	-0.866061326	-1.036760481	-0.900816129	-1.001024463	-0.931388253	-0.916263362	-1.091195767
-0.022261146	0.167181917	0.304837019	0.48083324	0.563919978	0.590444994	0.703115818	0.805425849	0.781744767	0.908839308	0.954751619	0.857988619	0.93460354	1.033244471	0.95768603	0.993775441	0.868525553	1.064751949	0.990270495	0.980982208	0.941888272	0.835163661	0.784082795	0.817842511	0.759311633	0.587025547	0.52569438	0.452341695	0.189399013	0.099140661	0.159615895	-0.188008492	-0.044352242	-0.156722823	-0.26574746	-0.420903612	-0.464103717	-0.657566341	-0.812967576	-0.648670287	-0.765715328	-0.862598853	-0.867166449	-0.924120484	-1.058616719	-1.077691047	-1.137677086	-1.146198984	-1.168904017	-1.044358082
0.087272637	0.095871024	0.215680661	0.326135981	0.468583683	0.519754798	0.760227112	0.617741543	0.828944597	0.891026391	0.935810726	0.955299441	1.008234951	0.940931305	0.958850506	1.014313123	0.95234172	0.92254238	0.997125567	0.933135527	0.891351154	0.82682179	0.828310717	0.736723395	0.680056005	0.594327342	0.378052767	0.347781457	0.22605263	0.194905896	0.23688112	-0.016317269	-0.072732433	-0.16782619	-0.244314547	-0.356430288	-0.4814372	-0.526358926	-0.616877823	-0.800638066	-0.783821433	-0.783813054	-0.835321594	-0.902160244	-0.981209053	-0.926660078	-1.006923974	-0.958660627	-0.995897316	-0.936880873
0.074205407	0.261729934	0.154776874	0.490127589	0.516185234	0.552132162	0.679325487	0.750401625	0.765987336	0.789974835	0.797781269	0.938724626	0.934730198	0.984017579	0.833383908	0.998250313	0.999550976	1.087123858	0.974104997	0.866240673	0.950418816	0.75608221	0.805537051	0.693333919	0.60973673	0.464545516	0.634841702	0.404582525	0.251813534	0.094608892	0.101461605	0.074797668	-0.102241514	-0.250079896	-0.207558292	-0.291833049	-0.529153048	-0.544812589	-0.67222997	-0.815775407	-0.721549164	-0.926926165	-0.954390018	-0.905534416	-0.986408706	-0.935708529	-0.920414483	-0.997291494	-0.959919296	-0.954038906
0.089677004	0.173613072	0.364957629	0.355807578	0.435926778	0.589437221	0.524526795	0.671609605	0.818227104	0.942587529	0.965009993	0.893203232	1.15403056	1.117561211	0.965663714	1.026320749	0.916832094	0.925196843	1.017796489	0.834761986	0.854497009	0.882929799	0.722492008	0.802942922	0.405191083	0.596260302	0.375261597	0.388486388	0.389111816	0.274500396	0.120034579	0.022357606	-0.014244125	-0.18028311	-0.334873239	-0.395087584	-0.433372898	-0.57649239	-0.648361627	-0.60832925	-0.836530993	-0.858349654	-0.759762622	-0.902172306	-0.996784706	-0.920193467	-0.916849416	-1.034477616	-1.070612364	-1.014817171
0.126117714	0.215035022	0.229509287	0.484343578	0.411562094	0.499572557	0.658772835	0.803188475	0.799253809	0.877874009	0.902906045	1.021342902	0.972308878	1.065694659	1.046731136	1.109457553	1.009373457	1.010057115	1.002583229	0.977095637	0.736661996	0.747093433	0.809371862	0.747257101	0.666979943	0.532633384	0.455784905	0.34339858	0.348030513	0.201163358	0.087503092	0.064461768	-0.165102465	-0.195580433	-0.329786562	-0.413227364	-0.469318121	-0.53648449	-0.593961225	-0.765615478	-0.803454118	-0.933854252	-0.9648947	-1.056025055	-0.967704004	-1.074366211	-1.024402453	-1.059332305	-1.109071947	-0.993400503
0.133507137	0.10424202	0.308512355	0.407939239	0.459690862	0.566892492	0.673465468	0.898977793	0.85105297	0.756593092	0.938161283	0.953992952	1.002205805	0.999027267	1.09323693	0.937585794	0.996534659	0.947318392	0.82445351	1.05079526	0.880714631	0.728712689	0.682612593	0.655156903	0.616236025	0.613313737	0.598411785	0.451821509	0.340434087	0.203788438	0.068860933	0.066887355	-0.185599354	-0.146501152	-0.369315067	-0.504908255	-0.550795357	-0.56071385	-0.557136508	-0.582962623	-0.827145078	-0.878142753	-0.764340849	-0.843387683	-0.9982397	-0.93257834	-1.046482587	-0.919001542	-1.013061656	-0.947971235
0.037296551	0.160352449	0.444395838	0.699341459	0.640798771	0.578555871	0.354538939	0.341570726	0.521961369	0.646245709	0.791285345	0.759153415	0.712691402	0.592035828	0.615762935	0.675470223	0.674333024	0.621475469	0.818705768	0.891692997	0.871819145	0.745568396	0.49382828	0.272671244	0.38538911	0.606383663	0.646782894	0.705786891	0.444357042	0.174998283	0.038139837	-0.018155558	-0.021043776	-0.20400052	-0.443961897	-0.600753909	-0.628577583	-0.614886286	-0.387180038	-0.287826446	-0.461277663	-0.721664681	-0.713769899	-0.803623811	-0.643712327	-0.730417981	-0.625194969	-0.655246025	-0.574532355	-0.756585885
0.196907544	0.268595033	0.450642642	0.681968316	0.556819962	0.570086305	0.658347583	0.619312792	0.669653566	0.692166196	0.835866777	0.910745323	1.046200346	1.000108045	1.064922526	1.059138382	1.079166	0.911278886	0.858976399	0.879721296	0.736523244	0.772724895	0.827624799	0.723541753	0.677723605	0.602981072	0.614280345	0.772057389	0.524664231	0.299162468	0.188923762	-0.050512851	-0.260603458	-0.304498795	-0.485085447	-0.482922993	-0.689575906	-0.664440657	-0.729010127	-0.629566689	-0.716467103	-0.655865883	-0.873168702	-0.713275108	-0.845322415	-0.962827452	-0.842347115	-0.929207977	-0.896410178	-0.821681051
0.195730504	0.168626079	0.309639445	0.395007256	0.466656057	0.682293878	0.682047008	0.679747298	0.755461107	0.834769637	0.892733041	0.941458274	0.980753875	1.075973144	1.068803146	0.992962918	0.992784628	0.942816895	0.92412419	0.987834635	0.884788779	0.92358247	0.769496325	0.80050305	0.707105768	0.535714707	0.493850453	0.388203528	0.2477642	0.107549803	0.045669349	-0.025540128	-0.024410998	-0.213987646	-0.258890518	-0.402197096	-0.518223119	-0.601515349	-0.697398941	-0.701035505	-0.785232604	-0.791963718	-0.808279273	-1.02278911	-1.074259761	-1.055999753	-1.065685194	-1.043062937	-1.04062104	-1.195551664
0.055924373	0.322842197	0.413885493	0.683941953	0.706260486	0.729598629	0.50472495	0.462988146	0.581148764	0.804088422	0.917072661	0.967309999	0.813357263	0.827046779	0.765902808	0.737920086	0.845243339	0.781532429	0.845962203	0.886419615	0.894349313	0.819582526	0.629102031	0.398156468	0.427546516	0.704829368	0.718513485	0.616849524	0.455893181	0.267792909	0.06530587	-0.025522368	-0.072250807	-0.255307954	-0.414141598	-0.682739148	-0.757480793	-0.565734057	-0.556928303	-0.385466429	-0.575728086	-0.823513263	-0.935652655	-0.844033399	-0.837892853	-0.778414516	-0.76105477	-0.791217646	-0.686006722	-0.750195369
0.109343313	0.058529782	0.254475148	0.482325678	0.508323779	0.486936519	0.454027883	0.310748764	0.254367402	0.183015049	0.265976466	0.19051939	0.533609203	0.569561374	0.72271962	0.679454853	0.62924702	0.532178377	0.372606388	0.323578651	0.22894964	0.166262769	0.265486676	0.393997287	0.468290596	0.57410013	0.487549208	0.391366474	0.272573277	0.157767187	0.086575346	-0.075468477	-0.087229098	-0.183421719	-0.207359812	-0.450025178	-0.53307966	-0.622225997	-0.492244386	-0.386534459	-0.216980394	-0.177848658	-0.196352333	-0.378052991	-0.523700471	-0.518969875	-0.746904761	-0.652090236	-0.724132057	-0.565632727
0.039530036	0.163775781	0.289829975	0.399011629	0.336643998	0.634761267	0.509631302	0.69260917	0.679381912	0.861808861	0.974690798	0.939363095	0.976317524	0.966211687	1.107380574	1.11690504	1.13421648	1.029473073	1.039572725	0.87912066	0.79054353	0.788934485	0.857389979	0.655214511	0.912804989	0.474149639	0.498106044	0.394966185	0.319216255	0.315831713	0.026938044	-0.005231067	-0.200021998	-0.272654372	-0.270200941	-0.315269885	-0.516211039	-0.554884365	-0.600141765	-0.634981285	-0.708527765	-0.829364394	-0.800743955	-1.013633646	-0.898744023	-1.069664674	-1.004953229	-0.982742521	-0.974658249	-0.940484026
0.223110549	0.451042549	0.472428193	0.592818275	0.525957322	0.625652486	0.62882502	0.771350562	0.793586465	0.710824759	0.824717588	0.656793783	0.843004805	0.906606387	0.979406196	1.109956561	0.989115929	1.026856666	0.890206819	0.951419969	0.8462859	0.844311746	0.664215587	0.81308957	0.642550303	0.862880047	0.710958816	0.632273779	0.574101141	0.324173845	0.170572292	0.011239148	-0.18455052	-0.257901155	-0.523401141	-0.527876551	-0.650303624	-0.842198803	-0.63635759	-0.653487021	-0.759397497	-0.717952927	-0.636741021	-0.666117827	-0.756122424	-0.83971979	-0.825836792	-1.006295065	-0.834488373	-0.827211612
0.053623463	0.155797949	0.382506681	0.631954097	0.643588798	0.581164675	0.364716106	0.276210462	0.401279444	0.640738983	0.714909135	0.568406229	0.544977089	0.48072357	0.390388803	0.433027392	0.468002256	0.450307496	0.665046084	0.679114512	0.630215169	0.501914022	0.405173097	0.224565122	0.408334632	0.461265542	0.615351537	0.545437459	0.405141455	0.20380055	-0.01330687	0.048209813	-0.013026695	-0.177057001	-0.417280142	-0.561897345	-0.614561554	-0.567798491	-0.289866475	-0.184548764	-0.359898171	-0.591406797	-0.603193021	-0.710479069	-0.570071781	-0.465508736	-0.458912671	-0.471750087	-0.450118112	-0.422318241
0.213216207	0.207052164	0.218762185	0.370109407	0.563834404	0.576115137	0.736281767	0.637819767	0.82247397	0.717470147	0.843200684	0.90114144	1.041872713	0.980648402	1.036445554	1.084074582	1.04683946	0.941859987	0.937758061	0.889082292	0.891868673	0.784051645	0.841941349	0.677935561	1.164906071	0.566907493	0.313052598	0.420386094	0.377900397	0.263345937	0.113268694	0.019776605	-0.079766582	-0.117550611	-0.312372577	-0.392604509	-0.532264215	-0.544206207	-0.672059909	-0.855346838	-0.725680233	-0.95935679	-0.866908422	-1.03544695	-0.891643676	-0.899412396	-1.021336128	-0.980505006	-1.0669	-1.060733739
-0.029919367	0.138561646	0.228885883	0.356726001	0.491087806	0.54088217	0.643456153	0.712597684	0.774614124	0.748289116	0.896650948	0.999246683	1.077505639	1.028059103	0.995721244	1.032120471	0.992140216	1.048097504	1.043395931	0.917604837	0.77927386	0.976183992	0.774113854	0.908873253	0.610813298	0.594157316	0.469316716	0.424066587	0.406279276	0.161757013	0.107341965	-0.016954204	-0.07028506	-0.236057587	-0.370797122	-0.421188881	-0.464328329	-0.613624163	-0.680673589	-0.745435302	-0.828107657	-0.816496075	-0.984450839	-0.974955418	-1.085872434	-1.052025809	-1.064200241	-1.018308723	-1.082466626	-1.024535048
0.099092996	0.254400571	0.280756695	0.419877269	0.45311439	0.631130687	0.635986337	0.771021557	0.820269927	0.859881023	0.894667732	0.871171041	0.899282029	0.913586323	0.939741324	0.964599887	0.979802938	0.978416511	0.986700533	0.813452268	0.87950084	0.790294133	0.790275356	0.733498144	0.628872991	0.591052371	0.521133721	0.450238887	0.383071071	0.191666464	0.033910884	-0.005468167	-0.127206507	-0.240173189	-0.251446017	-0.453848669	-0.57239444	-0.544057891	-0.651162763	-0.785877152	-0.712356117	-0.836757022	-0.81270382	-0.974311791	-0.876361477	-0.930838361	-0.927480882	-1.008959043	-1.000488643	-0.896672125
0.037859246	0.116807218	0.139011068	0.322816415	0.338882963	0.511651037	0.372652798	0.526992665	0.435731642	0.415636893	0.55099347	0.574342002	0.633141166	0.822699848	0.827081844	0.945529035	0.891118516	0.72391226	0.627093205	0.617298112	0.461728748	0.452901375	0.441170806	0.458713394	0.492256481	0.498566036	0.289780214	0.363360962	0.240046965	0.095784274	-0.044362313	-0.006357614	-0.06799646	-0.153293422	-0.197261545	-0.353209394	-0.494747448	-0.528173014	-0.385834023	-0.529389451	-0.458501187	-0.452163734	-0.411090614	-0.615682896	-0.600038605	-0.754975537	-0.963489103	-0.914048199	-0.715595532	-0.70526205
0.072085851	0.25322565	0.373181953	0.323166242	0.43292329	0.47801488	0.571201781	0.787811389	0.828378556	0.854240849	0.871926087	1.010001566	0.813150944	1.051698494	1.012931089	0.993018069	1.089724015	0.979418915	0.88986768	0.942049128	0.966657532	0.859986536	0.788148585	0.734208609	0.699124436	0.425215709	0.513511431	0.410249776	0.319148273	0.198872782	0.184821571	-0.114580226	-0.065600063	-0.223203195	-0.307556271	-0.326622305	-0.665184979	-0.575053704	-0.766339463	-0.795006067	-0.791509317	-0.769996043	-0.910985352	-0.94218897	-1.031286418	-1.097024601	-0.959622101	-0.985760293	-1.054456491	-0.997956328
0.025875538	0.237050019	0.244671835	0.376843782	0.432061265	0.53795209	0.656076962	0.655325676	0.723244962	0.937047744	0.955393523	0.961443766	0.997519467	0.997960473	1.036551954	1.007899297	1.019524737	1.094411172	1.004424966	1.085314339	0.863792176	0.83808262	0.863128859	0.824601763	0.595092734	0.696146705	0.477769238	0.423847001	0.293776463	0.301678221	0.144148104	0.109837223	-0.049511922	-0.14381174	-0.262414409	-0.303543233	-0.482775405	-0.610902921	-0.545605022	-0.644874937	-0.830068677	-0.83007623	-0.94344881	-1.059361699	-1.023880161	-1.141367556	-1.018881379	-0.996148254	-1.049017781	-1.01123096
0.050910622	0.276828376	0.404869231	0.419285286	0.436799902	0.588933159	0.55834716	0.822353844	0.66274954	0.755284577	0.91140959	0.844411904	0.84997778	0.848056099	0.92507849	1.032599291	0.998308199	1.034454767	1.055707216	0.887888321	0.843869439	0.844476831	0.8063256	0.700034553	0.651760639	0.496739597	0.595215741	0.400492767	0.219105783	0.329850666	0.060472728	0.050099595	-0.159231866	-0.232935501	-0.254559665	-0.438025008	-0.551820584	-0.502272742	-0.600917188	-0.653509936	-0.776337208	-0.807823236	-0.837598951	-0.926321933	-1.038666265	-0.981770522	-0.929514783	-0.979920234	-1.074543198	-0.977289882
0.035503467	0.302465815	0.21871194	0.370392544	0.420640365	0.48197345	0.621475337	0.700608042	0.790413728	0.853243868	0.865141778	0.845553844	0.929322017	1.009608663	1.002329274	0.928996678	0.957371916	0.995022926	0.943953022	0.902540424	0.901153365	0.875473807	0.763526887	0.785897141	0.73770884	0.472766961	0.493601283	0.390817617	0.406506152	0.172480971	0.084397697	0.018522997	-0.074894121	-0.212521739	-0.232064784	-0.361780157	-0.421829834	-0.536415784	-0.696163612	-0.663893234	-0.659064214	-0.846973375	-0.862093311	-0.829663825	-1.026135204	-0.971157651	-1.044654034	-0.93394072	-1.059291582	-0.995971526
0.022121122	0.320747488	0.418811202	0.139298582	0.45133873	0.683141095	0.749561392	0.743323939	0.663765876	0.936612824	0.836963907	1.049943008	0.839963293	0.867054067	1.071178842	0.919863685	0.936322575	1.090074791	0.929112282	0.998038233	0.875989248	0.926206315	0.629930786	0.587355844	0.543771491	0.61377899	0.472042974	0.420484045	0.304746627	0.161037886	0.213943436	-0.016093669	-0.000211353	-0.143969296	-0.328249767	-0.355091065	-0.538613872	-0.655643011	-0.662705173	-0.611697269	-0.666748184	-1.010900992	-0.902378564	-0.900285882	-0.937981528	-0.90992424	-0.98396813	-1.101355606	-0.902261403	-0.904376201
0.089562665	0.104443768	0.354714822	0.393366931	0.395688608	0.569549805	0.666275136	0.770512751	0.817964364	0.804418098	0.928888427	0.935697172	0.913744427	0.970674779	0.97912785	1.094159461	1.002781876	0.894095293	0.879891122	0.98932412	0.804651146	0.85549134	0.850756818	0.77120214	0.586586774	0.602936263	0.52420269	0.415253343	0.291325331	0.26757344	0.052283517	0.176258291	-0.104395977	-0.190003877	-0.290699853	-0.433416381	-0.536465911	-0.50270854	-0.587034409	-0.705319542	-0.747270973	-0.878352486	-0.871120064	-0.859447392	-0.923993733	-1.04604972	-1.08203671	-1.093047482	-0.939457441	-0.944710825
0.228989781	0.325089999	0.541639927	0.626535658	0.723488137	0.443218711	0.505102257	0.502351073	0.69982048	0.679972353	0.957912859	0.954127613	0.911854897	0.879661342	0.947445175	0.894528415	0.774269504	0.876849763	0.937658426	0.827887228	0.963764988	0.788747428	0.63965833	0.653682239	0.677784669	0.707599782	0.778319377	0.583789413	0.500317794	0.450557036	0.212403607	-0.011933161	-0.284744129	-0.488958972	-0.594183719	-0.561893046	-0.723988161	-0.514205617	-0.525363591	-0.638130938	-0.6976527	-0.934594461	-0.805469559	-0.853937667	-0.93319161	-0.945183269	-0.80461977	-0.810303465	-0.900431777	-0.911405269
0.062350918	0.168347423	0.338478818	0.337106671	0.524806957	0.552527716	0.549370697	0.790995861	0.948213354	0.918651913	0.756707653	0.895773863	1.090349615	0.942068318	1.007909849	1.000460288	0.905703791	0.936478437	0.969676688	0.945642601	0.875063097	0.79516903	0.818776239	0.748511397	0.607733218	0.620116064	0.432362336	0.412700745	0.382601896	0.168459627	0.250733147	0.059795058	0.0117082	-0.250936008	-0.257952155	-0.521040723	-0.452101982	-0.637351608	-0.510014385	-0.717930381	-0.782575656	-0.912637908	-0.945514325	-0.957725432	-1.022490934	-0.911222357	-1.088585929	-0.978297628	-1.022521866	-1.058112587
0.086948019	0.200331353	0.296775672	0.384485416	0.458421826	0.694156921	0.713860164	0.794338277	0.711095797	0.879974403	1.052059588	0.913274866	0.94979946	1.04969896	0.919177688	0.976699311	1.212669384	1.121737002	1.080660229	0.804742026	0.935125844	0.875072995	0.661408539	0.754360318	0.729179615	0.498139372	0.462089091	0.479449243	0.3198844	0.324356948	0.159046003	0.06302047	-0.113316259	-0.198234162	-0.290998517	-0.43171171	-0.542598275	-0.567804734	-0.636333108	-0.814761904	-0.881806776	-1.06742025	-0.831350527	-1.095967282	-1.120633962	-1.084314687	-1.115291161	-1.14443895	-1.119354127	-1.029422256
0.038613884	0.221202948	0.361279795	0.466619859	0.596063465	0.530660803	0.715530907	0.736788085	0.840440332	0.805861527	0.944042708	1.025798881	1.069647169	0.920010904	1.048410334	1.105411746	0.943361777	1.051887606	0.995924126	0.871142707	0.998246892	0.802875684	0.746143503	0.732225477	0.395628526	0.694451521	0.415252745	0.407945696	0.299641073	0.210334496	0.176666458	0.011658807	-0.119060802	-0.196395813	-0.223466836	-0.578858344	-0.471569159	-0.526142557	-0.719608216	-0.694480337	-0.806479036	-0.81783068	-0.833748852	-0.904419758	-0.880414533	-0.998779824	-0.916109948	-0.87389551	-1.008213561	-1.019667959
0.123408926	0.100062268	0.312543605	0.36398289	0.428272191	0.520432915	0.619096425	0.726430443	0.797909135	0.813239217	0.802632985	0.916809293	0.915713492	1.040488008	0.972209433	1.011390871	0.965546633	0.881999386	1.002981161	0.921725532	0.861451355	0.777320716	0.792907895	0.7844704	0.4311099	0.471246633	0.543789651	0.371409156	0.193822261	0.20642312	-0.056609091	0.080416973	-0.056154485	-0.171365105	-0.262264985	-0.44490061	-0.45906033	-0.57905421	-0.637017133	-0.725872737	-0.854947419	-0.85810885	-0.923596563	-0.994669126	-0.950801178	-1.083178615	-0.96079683	-1.009961799	-0.786075155	-0.987353316
-0.01196076	0.100401551	0.345770927	0.427402283	0.596478182	0.552306094	0.738263805	0.67626211	0.94181516	0.786678977	0.918077565	0.864440493	0.952984216	0.980120455	0.959912623	0.996448613	0.933400503	1.056991745	0.884116785	0.858096642	0.968323808	0.810470313	0.737619563	0.75905419	0.59794451	0.515551046	0.513639917	0.406730538	0.163189455	0.231618845	0.109653103	0.006605375	-0.004045852	-0.164135796	-0.326354344	-0.33742996	-0.414802117	-0.72902666	-0.665157927	-0.704888058	-0.838882763	-0.961307324	-1.001363623	-0.935293058	-0.962460361	-0.96723466	-1.110946835	-1.135963282	-0.85119082	-0.978688268
-0.027244961	0.112688645	0.269211804	0.425169298	0.503516269	0.448878684	0.469810211	0.461642092	0.44793657	0.404204335	0.399693788	0.579696282	0.637138629	0.780124032	0.852618282	0.952303672	1.033762285	0.822512316	0.664527676	0.547748279	0.465185911	0.430525136	0.494507157	0.462585355	0.434676579	0.414361502	0.361339378	0.362232102	0.244864711	0.17997097	0.030041183	0.056125141	-0.059817124	-0.157571032	-0.174709049	-0.430980553	-0.437337326	-0.423220238	-0.400699631	-0.489467815	-0.458922112	-0.435663237	-0.442201597	-0.591984629	-0.623370247	-0.71353211	-0.884139638	-0.927835429	-0.882713735	-0.771361394
0.245687557	0.354556015	0.37238331	0.525649091	0.652472256	0.698657141	0.741530662	0.685591434	0.667948192	0.652278829	0.860125858	0.966156757	0.854113201	0.915912022	1.023576699	1.09313453	0.974100359	0.838674946	0.876248806	0.932169852	0.681509708	0.625275694	0.781750502	0.808311366	0.737476528	0.823117618	0.718453725	0.721186936	0.656029269	0.318839613	0.300837589	-0.006208634	-0.155523788	-0.340257545	-0.440157385	-0.563125787	-0.673355799	-0.51671575	-0.650110906	-0.804908224	-0.64219642	-0.534345793	-0.626938384	-0.727215337	-0.835123365	-0.691034947	-0.818682123	-0.91737441	-0.911981823	-0.869135801
0.076490414	0.278656967	0.36208148	0.3869258	0.369467891	0.485236988	0.640555372	0.675601786	0.703516425	0.718698133	0.898606943	1.021662582	1.01614891	1.037537481	0.967811102	1.101231837	1.117120072	1.083552363	0.995980637	1.045004165	0.932971468	0.826412743	0.730405714	0.798960558	0.743596395	0.604361861	0.416337735	0.440894346	0.418212901	0.209896787	0.111220976	0.11424533	-0.11767151	-0.126616596	-0.373478241	-0.36365846	-0.579723459	-0.556369425	-0.703576631	-0.773242044	-0.799378301	-0.870924785	-0.905698992	-1.049525642	-1.094712486	-1.013672916	-1.061045187	-1.094916587	-1.110940655	-1.09125452
0.743087227	-8.105818547	-11.55257304	-7.843532361	1.471073714	13.40203698	14.37154135	-5.898532058	-9.20406925	4.505702923	1.299747763	36.5311129	2.114245442	-12.613536	15.48307667	8.87051455	4.583285145	5.199318151	7.218777143	14.1139956	17.82723713	-12.56894786	16.00536797	9.785851771	17.32481379	22.87535164	10.25032968	-15.22833956	-21.59394681	15.40545196	5.862231896	-1.251996257	6.072901067	23.55141807	8.10297648	4.774337197	12.09520178	2.824172731	2.700976966	-6.268317928	-7.181629634	-9.516562238	19.66011781	20.30748747	32.69896541	-22.7374194	-3.819004629	-3.014728927	-7.979131649	2.737212143
-3.42640656	-7.152863105	-23.54514471	2.592079397	5.268059357	-2.281619149	14.13649507	-1.385271159	-4.680243747	11.4131673	9.623347489	6.550300416	4.969388952	3.89268874	-1.397196572	-1.614518666	-15.64770994	19.97777261	5.941481953	-3.027577718	-4.13997133	2.249496219	4.890713578	-8.50285995	6.219564899	1.350148633	0.035385607	11.90444726	8.049854921	-3.089841675	-1.574562978	5.196736755	-12.7481423	-14.44589769	-7.325350638	-19.56775329	13.18722521	-2.808196963	-5.348790987	-1.780239607	-11.54112874	-0.204946276	-5.214109221	-4.171195334	-12.8067471	5.319274773	-15.33704729	13.5100679	13.36725331	-16.41031174
0.232673521	0.406363662	0.520906602	0.766368254	0.68555586	0.632356786	0.75688848	0.828776294	0.705450163	0.627059616	0.731657393	0.802750766	0.970521898	0.86740806	1.012088176	1.149048812	1.068588493	0.911066586	0.937172719	0.862880792	0.675158924	0.623646417	0.800712106	0.837954629	0.669839596	0.709144713	0.688804509	0.6844807	0.506787079	0.433541046	0.207009738	-0.024586444	-0.226710597	-0.352818188	-0.591967904	-0.734087064	-0.568202269	-0.693229891	-0.751575175	-0.597371377	-0.497804434	-0.801584424	-0.759196361	-0.80885581	-0.893268148	-0.854162072	-0.89496486	-0.742942144	-0.935859737	-0.84260985
0.105357661	0.169203574	0.361714128	0.485894121	0.375097242	0.540976716	0.578651626	0.71036536	0.88809706	0.822675156	0.7528032	0.876185606	0.988835393	0.998861044	1.050143972	1.012008074	1.14907382	0.915400692	0.988728798	0.965031323	0.884813556	0.798577471	0.867878741	0.811752713	0.779371423	0.624083414	0.568473459	0.348192579	0.366739142	0.256577811	0.014320944	-0.071731733	-0.051169508	-0.047098587	-0.3199763	-0.306055056	-0.55555093	-0.608137864	-0.716841244	-0.652405583	-0.770455505	-0.862199526	-1.059507088	-0.992526939	-0.913483248	-1.051571001	-1.028532675	-1.13951671	-1.072843199	-1.042615082
-0.091673733	0.234016683	0.16734876	0.461550217	0.470388284	0.65492602	0.54568213	0.724041576	0.876467715	0.668606947	0.877327147	1.161367828	1.075194646	1.094428545	1.133832948	0.923249177	1.136431771	1.018062503	1.004014128	0.955896769	0.957565606	0.831613926	0.734633127	0.714967158	0.592501884	0.563028976	0.548225503	0.354219119	0.205282954	0.280885278	-0.04642673	-0.011379446	-0.114590422	-0.296378919	-0.4141025	-0.561591597	-0.449262663	-0.572995636	-0.602898565	-0.88883665	-0.87184154	-0.940655749	-0.927090848	-0.799396968	-1.074582258	-0.877216991	-0.99379814	-0.958271629	-1.010218317	-1.187315528
0.066669219	0.330810537	0.267310181	0.445948148	0.340049441	0.585924561	0.844859131	0.837910437	0.76804413	0.858546738	0.799296487	0.917450764	0.99199739	0.892274642	0.915520301	1.234330379	1.137534546	0.98167042	0.950714787	1.048713513	0.917362666	0.79409779	0.878624252	0.706430678	0.561376398	0.515856311	0.616584501	0.445937534	0.274660387	0.161224735	0.087688116	-0.071429406	-0.087289765	-0.11993951	-0.144146149	-0.273530418	-0.462773451	-0.635924265	-0.539616199	-0.799942517	-0.824966654	-1.077220355	-1.009875358	-0.943561211	-1.056556133	-0.967309286	-1.071522398	-1.001751675	-0.934036421	-1.018209907
0.164122687	0.178106895	0.310435885	0.399539436	0.497151039	0.564187844	0.65235244	0.728591481	0.831481506	0.860255951	0.792716243	0.85923913	0.863952229	1.005266334	1.040797496	0.98142917	0.941863338	1.005929697	0.954924666	0.971189616	0.94809314	0.946030512	0.79619562	0.689066501	0.697560047	0.507226412	0.416580159	0.460880289	0.327554658	0.242000488	0.15726859	0.125053355	-0.072484935	-0.147922859	-0.368411558	-0.324766983	-0.33267383	-0.539463741	-0.682194881	-0.717908135	-0.658771476	-0.796855324	-0.910369578	-0.941223253	-0.909336113	-0.988950432	-0.980513886	-1.043218994	-1.073502476	-1.019022202
0.33442226	0.511281343	0.660756062	0.634619738	0.616075517	0.53398161	0.540533963	0.501327221	0.718063591	0.90910442	0.914265307	0.952085084	0.858543158	0.827753728	1.000352819	0.856025458	0.917009099	0.944475803	1.084671793	0.916480584	0.848483595	0.716246519	0.60439659	0.694349847	0.651201895	0.465866758	0.623365001	0.800333537	0.6210691	0.430987166	0.363432552	-0.019483209	-0.288568217	-0.447539206	-0.644105595	-0.758419635	-0.457375125	-0.676865741	-0.612878552	-0.619396217	-0.678279538	-0.824570823	-0.829155881	-0.880746646	-0.934431944	-0.963270175	-0.950378481	-0.820013053	-0.78099911	-1.03730445
0.106537838	0.232849772	0.311335921	0.455920572	0.410549049	0.612503639	0.769021202	0.758926332	0.721328771	0.92177328	0.707895682	0.945202854	0.933396189	1.035183394	0.90136762	0.928939899	0.94962101	0.953822505	1.001258702	0.955910187	0.965852667	0.907303047	0.755034084	0.650223785	0.855998895	0.56875929	0.491995911	0.349986	0.212809655	0.16542618	0.075367922	0.066493655	-0.06864202	-0.160075791	-0.1968437	-0.458354021	-0.428255346	-0.515005372	-0.652304443	-0.594071335	-0.780500935	-0.728209272	-0.875626929	-0.851969664	-1.022715738	-0.913864627	-1.030222118	-1.043517161	-1.07228655	-0.960168315
0.102031468	0.261677124	0.254359481	0.288364495	0.483376241	0.497033891	0.586159259	0.718491208	0.760891971	0.84864016	0.856128187	1.049618195	0.969098594	0.97974008	1.07412924	1.019095071	1.078509263	1.068217304	1.000925142	0.91648798	0.953285118	0.856026923	0.85418659	0.661640577	0.669111787	0.562954443	0.461270241	0.381277797	0.364514282	0.247412522	0.125573064	0.0600683	-0.119368632	-0.252916119	-0.306547138	-0.357789782	-0.536459226	-0.605576626	-0.632442727	-0.733374123	-0.875074659	-0.865474072	-0.943539802	-0.976825981	-1.027398189	-0.971986811	-1.109745066	-1.114030059	-1.13671439	-1.132886972
-1.592594921	-11.14727384	-16.61422595	-0.685979072	5.646846538	-12.50309861	8.319064781	16.43534031	-14.31976178	10.42225402	17.35595502	3.75238902	7.491664152	-4.899504221	5.356969885	-1.465590706	29.27187495	9.962266481	1.55505924	7.216779377	4.781100454	-11.4610677	11.48201871	13.57160459	-3.88131078	-11.54947541	1.918820946	-11.97518318	-5.224588335	11.08021263	31.02547165	3.776250611	10.55891824	-13.06898613	-23.17455217	19.06649912	-2.508729846	8.883247937	-9.298118459	3.73877927	13.78977166	-3.773178907	-9.631752341	5.517496945	9.705637919	-7.120048769	-3.546512044	9.045510656	0.53005842	0.293270842
0.16021754	0.230259322	0.536003338	0.750223676	0.81516936	0.724614295	0.561384758	0.477483407	0.689320022	0.794314524	1.043693063	0.942899412	0.901463502	0.874503538	0.906618258	0.866855049	0.839623027	0.786180726	0.869544903	0.926098024	0.952364438	0.879104676	0.648635343	0.471572003	0.429282552	0.725931039	0.676126119	0.731322025	0.435829372	0.330077547	0.103407792	-0.044847457	-0.133758388	-0.183829093	-0.498080626	-0.727539348	-0.810105583	-0.614201021	-0.516084953	-0.418470591	-0.575741652	-0.853370448	-0.952851558	-1.007300263	-0.936316162	-0.853126828	-0.898828417	-0.917077256	-0.859190218	-0.899517365
0.114944417	0.33520633	0.340860679	0.381847957	0.529481432	0.45370414	0.690395751	0.64901067	0.816294895	0.924948147	0.886166054	0.801005938	0.995594615	1.045990757	1.041494945	0.921372499	1.112043575	1.061897237	1.110255072	0.843238209	0.917662619	0.703986332	0.630971307	0.662087179	0.653618097	0.49521412	0.35691849	0.382816353	0.253634314	0.299228161	0.192576872	0.229408462	-0.122169262	-0.114654059	-0.186971175	-0.473038374	-0.384792819	-0.390112315	-0.669717242	-0.663067134	-0.837567772	-0.93443434	-0.77187792	-0.851885419	-1.048740068	-0.883446695	-0.875438053	-1.091219187	-1.041591568	-1.021963753
0.256158903	0.422294386	0.607525837	0.682201725	0.59910898	0.595793388	0.631426095	0.656204106	0.666363484	0.777495437	0.930584555	0.876283737	0.908985257	0.936768954	0.789562741	0.907708492	0.718485457	0.831305036	0.990495433	0.926734075	0.909776091	0.76615469	0.769412968	0.547516369	0.56558817	0.494903461	0.478188164	0.63378785	0.623736554	0.411225834	0.203873035	0.043965484	-0.259114291	-0.486563688	-0.603421785	-0.668388434	-0.735911294	-0.522835737	-0.707432861	-0.631795603	-0.698938346	-0.668108361	-0.932884896	-0.841949722	-0.906670406	-0.993986622	-0.878783546	-0.875007347	-0.835073792	-0.815779108
0.076028727	0.123124028	0.27569558	0.38783012	0.367093091	0.441059089	0.763552857	0.685850672	0.639706643	0.963285149	1.082164583	0.996733465	0.913835883	1.041609326	1.126176786	0.866451672	0.956098921	1.009079316	1.003477081	0.944864734	0.951331587	0.832041607	0.818453838	0.814907521	0.575462025	0.508985857	0.54845933	0.313802826	0.291109025	0.325573116	0.128838081	-0.101634799	-0.144370794	-0.240851812	-0.395436304	-0.506771569	-0.613641271	-0.535863269	-0.724527622	-0.82275768	-0.758164555	-0.722255395	-1.051298335	-1.057162356	-1.059995456	-0.994145049	-1.188234468	-1.095762593	-1.07155569	-0.999450789
0.004353901	0.158348869	0.321918991	0.426476168	0.515414807	0.577112178	0.443441429	0.288446073	0.141895237	0.034362559	0.011661794	0.087870601	0.200887618	0.463432205	0.558708259	0.594132187	0.547353294	0.416541019	0.276002785	0.061786289	0.0150129	0.033176768	0.170458026	0.241359601	0.457715143	0.53513117	0.597797997	0.543743845	0.324642324	0.202246757	0.054225529	0.005847382	-0.039698138	-0.186778641	-0.371153246	-0.560968265	-0.544665281	-0.503057948	-0.414662766	-0.34841248	-0.106759642	0.000517831	0.016441769	-0.050846431	-0.211077216	-0.367744691	-0.549204454	-0.53769869	-0.543789277	-0.394121267
0.132697404	0.208690244	0.371776006	0.382539209	0.406865027	0.633329615	0.817508779	0.770119077	0.782760574	0.815802421	0.914641822	0.917247074	0.976558043	1.052837782	0.905021752	1.055459493	0.984275182	0.96006988	0.962529742	0.95414439	0.950341426	0.855700098	0.822022584	0.828154487	0.585712478	0.553719352	0.34992963	0.412861212	0.248225549	0.227194948	-0.009632775	0.023924317	-0.121864839	-0.272357175	-0.327215832	-0.242350958	-0.635182818	-0.547234055	-0.583567731	-0.630063793	-0.600245107	-0.914868217	-0.803148944	-0.863183693	-0.896845458	-0.970888457	-0.95684956	-0.997595897	-0.883598671	-1.030380477
-0.007334483	0.241485977	0.458998735	0.781704192	0.751447954	0.634062251	0.583599668	0.373497887	0.583138768	0.780733843	1.029666743	1.057262817	0.920896607	0.902999897	0.958087179	0.873731654	0.922121236	0.930104861	0.894396046	1.010439315	1.020668161	0.89049079	0.559720698	0.430463746	0.513254288	0.682053292	0.700481756	0.724152971	0.533822995	0.173557423	0.074857906	0.076174648	-0.188970781	-0.307623027	-0.499488289	-0.653019226	-0.764274516	-0.682551498	-0.513252323	-0.5544609	-0.614765714	-0.880351491	-1.008917036	-1.010889567	-1.0164362	-0.958680812	-0.835808823	-0.8734162	-0.890057517	-0.895234852
0.084680875	0.222518645	0.184232874	0.342443679	0.439806667	0.678994851	0.661899287	0.625310619	0.840078338	0.966417789	0.865808838	0.915710561	0.996018401	1.019771888	1.09004347	1.054979866	0.983937427	0.941501228	0.971457074	0.884328624	0.893063233	0.82107381	0.71099627	0.691404342	0.700646802	0.580132143	0.613035167	0.327705579	0.278509322	0.191044344	0.076045406	-0.042749798	-0.075122248	-0.230089568	-0.303947405	-0.404887296	-0.429657917	-0.514616537	-0.623434806	-0.751636719	-0.768673687	-0.886890684	-0.837924202	-0.942882379	-1.002814334	-0.992182444	-0.913486126	-1.028895081	-0.946958909	-1.03640633
0.108273699	0.168286306	0.514534465	0.726930991	0.762097201	0.661739428	0.487721877	0.467877819	0.630602703	0.929230897	1.046734954	1.033188476	0.910099758	0.862450648	0.917863946	0.933525039	0.862673021	0.843393388	0.944142976	1.018670071	1.0116102	0.812303131	0.704089299	0.375750344	0.484739698	0.691277615	0.674097512	0.713266051	0.465429939	0.294453863	0.041463092	0.021654891	-0.048821017	-0.2852349	-0.505248472	-0.653324001	-0.734178784	-0.64508248	-0.579082235	-0.503192832	-0.685894735	-0.879087072	-1.096402536	-0.996118893	-0.924372146	-0.910186193	-0.890412987	-0.836232651	-0.884515399	-0.931012326
0.126593054	0.326575816	0.409189953	0.410430365	0.430350278	0.471531141	0.654048454	0.684375985	0.692531183	0.75127027	0.92984257	0.916488919	0.912160532	0.968203541	1.026585765	1.079697126	1.034471812	1.063316019	1.127064736	1.051798534	0.960810757	0.9806361	0.820365129	0.833289136	0.711291143	0.605761605	0.456453257	0.352905678	0.364608693	0.196546961	0.11620235	-0.073882017	-0.032328928	-0.283205099	-0.430606238	-0.408751725	-0.406391252	-0.575457439	-0.558363607	-0.884675072	-0.841492928	-0.832089712	-0.853553371	-0.999399182	-1.007456213	-0.93737782	-1.119721666	-1.026772819	-0.96966678	-1.009617903
0.028789937	0.142359501	0.199144091	0.258627418	0.385424163	0.546858504	0.512257817	0.452103849	0.437876638	0.456071474	0.543629559	0.562247195	0.734175194	0.785191335	0.929676935	0.893387032	0.936019716	0.797207315	0.764370742	0.569354161	0.559777018	0.474100995	0.388197337	0.376767669	0.491955019	0.423952433	0.284781497	0.231403005	0.160574481	0.094265848	-0.00487854	0.020728103	-0.120611597	-0.19698381	-0.105304884	-0.271122579	-0.313648747	-0.295854955	-0.521063568	-0.427169925	-0.438415886	-0.367851798	-0.614526893	-0.634655871	-0.710452273	-0.887599286	-0.921180613	-1.030348579	-1.044146741	-0.824038871
0.104546658	0.174480614	0.231035462	0.351006447	0.487402822	0.464544356	0.542666172	0.66384214	0.685449347	0.889538588	0.844626477	1.006986884	0.983590917	0.965278136	0.904900707	1.017813438	0.89535693	0.883268576	0.998698536	0.898583867	0.809379996	0.807642022	0.779715154	0.786092206	0.252197623	0.467228201	0.486013222	0.427715743	0.382870978	0.091226523	0.006673318	-0.089720555	-0.120654511	-0.143863902	-0.177352713	-0.507831412	-0.493378279	-0.505856743	-0.64398846	-0.785211317	-0.774559729	-0.715083414	-0.822850933	-0.862541057	-1.082132988	-1.037199529	-0.972488183	-1.028076942	-0.877577023	-0.976149925
0.469888918	0.409171538	0.59473919	0.609406218	0.751983786	0.585017287	0.557343849	0.590170739	0.682263331	0.850170541	0.844308087	0.942625602	0.867735025	0.997798223	0.955250598	0.763341255	0.822800699	0.897268584	0.856758385	0.721081306	0.797728796	0.688956443	0.797877115	0.755862913	0.492268287	0.450034222	0.697965713	0.618427525	0.595243184	0.424629166	0.231393979	-0.091191837	-0.202750923	-0.515126571	-0.610535639	-0.57798691	-0.531906132	-0.515546589	-0.541494255	-0.497152163	-0.691153491	-0.86509858	-0.869457236	-0.987629082	-0.964886713	-0.967312638	-0.998728153	-1.099766931	-0.960499522	-0.86639588
-0.019014903	0.192579995	0.256092474	0.370053881	0.34557265	0.455687363	0.656280193	0.71753921	0.798401553	0.749164636	0.809817295	0.824924363	0.930676684	0.957086559	1.024636914	1.003914121	1.125080436	1.05337294	0.89535451	0.931903128	0.903347615	0.788391596	0.854230251	0.719076928	0.6371684	0.473553679	0.40504813	0.409788793	0.34120757	0.229043353	0.126542385	-0.015398608	-0.079550848	-0.228928724	-0.331699815	-0.312424679	-0.475669116	-0.625043684	-0.721465284	-0.678622675	-0.830878703	-0.85017972	-0.842903747	-0.921089113	-1.026783928	-0.942856368	-0.990051825	-0.991339888	-1.01060328	-0.959730376
0.074929691	0.243193139	0.315760963	0.286087816	0.401731483	0.637649903	0.593754227	0.753477543	0.846280239	1.00318931	0.906104831	0.831204442	0.982539014	1.106379203	1.039374836	0.986569734	1.146619579	0.939873895	0.864743186	1.010577815	1.004758958	0.930856276	0.701130686	0.534529317	0.612386673	0.635100177	0.492468622	0.468183785	0.314800469	0.171216895	-0.086451249	0.07725906	-0.137007043	-0.275066021	-0.235087932	-0.41108434	-0.434749243	-0.60697697	-0.502718372	-0.75457224	-0.721849971	-1.071953874	-0.926777103	-0.987786873	-0.994264118	-1.043193447	-1.079936602	-1.24154336	-1.119599205	-1.050018241
0.128768238	0.297606501	0.347123083	0.385100559	0.464425082	0.580897241	0.634653673	0.80653208	0.762598333	0.826562158	0.976315032	0.979411314	0.892569245	1.007018281	0.947763655	1.009075119	1.008482657	0.948631742	0.961920191	0.896673062	0.799971046	0.883854438	0.642918908	0.712454105	0.616118981	0.622381045	0.51707378	0.37478305	0.377440008	0.209818552	0.032836405	0.033558191	-0.128423674	-0.105717478	-0.281926668	-0.40169298	-0.470748737	-0.595541542	-0.618928449	-0.689303307	-0.734877542	-0.807364294	-0.901296218	-0.96998896	-0.852232988	-0.981026952	-0.98896892	-0.910522526	-0.973637748	-0.956528
0.264873412	0.331316652	0.694480133	0.479065012	0.647389106	0.595251937	0.489506528	0.661860226	0.621934168	0.660906322	0.869824003	1.076306416	0.988574985	0.972801757	0.916737613	0.985684441	0.930709567	0.880098562	0.967037227	0.968638128	0.914174099	0.702417176	0.682701167	0.66710241	0.559175847	0.464624183	0.528159241	0.525810408	0.528969865	0.276334077	0.137689094	0.00758471	-0.143305449	-0.240194534	-0.506947201	-0.593965368	-0.77875043	-0.689307837	-0.525739742	-0.681726396	-0.665402103	-0.816411891	-0.883689896	-0.811062697	-0.973817938	-0.885327322	-0.910393136	-0.943876627	-0.966407835	-1.001006231
0.109876326	0.129346677	0.229602718	0.322925136	0.483826886	0.411549856	0.693018352	0.702802174	0.706469185	0.745144875	0.895581948	1.014012225	0.912813498	1.048198484	0.994418596	1.12722749	1.012686546	1.006163988	1.0539339	0.841527626	1.019374487	1.024358351	0.929965513	0.652276802	0.794727498	0.649546733	0.450994626	0.329459146	0.317592892	0.103826025	0.061106455	-0.078704498	-0.094138804	-0.307504428	-0.261914517	-0.385127645	-0.702168438	-0.682404351	-0.691746083	-0.923135475	-0.705437065	-0.865962592	-0.830111938	-0.98828604	-1.102333156	-1.056274208	-1.285856568	-0.977381363	-1.15977768	-1.065785367
0.171186502	0.493921248	0.648111866	0.713776318	0.600661835	0.659565682	0.813917713	0.672134145	0.806183639	0.701122384	0.811624309	0.802409489	0.964474575	0.795631104	1.129865822	1.065739618	0.9466663	1.036137393	0.966415585	0.81921389	0.821545129	0.702837922	0.64226698	0.658819324	0.723897202	0.660128419	0.70574421	0.66296855	0.565913851	0.444607096	0.205144619	0.081552443	-0.150305828	-0.436382098	-0.61136638	-0.563057515	-0.742546713	-0.749328238	-0.737826201	-0.645977042	-0.711646325	-0.674728474	-0.630125766	-0.664954839	-0.772135372	-0.791809712	-0.985129756	-0.875516498	-0.849023847	-0.804069684
0.20382464	0.184002266	0.219504234	0.459001997	0.519296536	0.558562816	0.572383261	0.631422009	0.740036946	0.855342961	0.874892203	0.793127495	1.07006855	0.972906863	1.051375405	1.0757803	0.898001317	0.971392821	1.107786091	0.839698109	0.921872123	0.886259337	0.801522137	0.741045631	0.702553471	0.657291984	0.467765258	0.359732716	0.328741464	0.327040778	-0.080168364	-0.018921539	-0.094499171	-0.190732785	-0.358050206	-0.317279005	-0.439758823	-0.647116431	-0.661951728	-0.666663856	-0.696428225	-0.898711136	-0.991073574	-1.090412103	-1.007891719	-1.061606647	-1.131899814	-1.032660734	-1.192734707	-0.936705573
0.005440035	0.262271669	0.294919074	0.556732822	0.531026954	0.592374297	0.642598385	0.341047614	0.626482602	0.626783972	0.830939209	0.95206337	0.665173283	0.622830581	0.777438551	0.549311596	0.707878068	0.672937318	0.755685942	0.810825125	0.810945481	0.656007596	0.463301463	0.406036704	0.328352337	0.619098917	0.612233245	0.603241709	0.413845664	0.173112004	0.178852513	-0.20282064	-0.126047908	-0.351933898	-0.468901091	-0.636598553	-0.738613684	-0.625680927	-0.377063238	-0.380962009	-0.511395206	-0.663303263	-0.875233029	-0.723707032	-0.70771341	-0.684156223	-0.813051766	-0.823346904	-0.627058515	-0.667849746
-0.017681355	0.211040768	0.295964841	0.398890864	0.440189123	0.450385497	0.401062705	0.393627882	0.319033609	0.052511458	0.211131434	0.247376025	0.44250545	0.542536395	0.629208572	0.741533344	0.594833715	0.520891336	0.39427715	0.26302588	0.117087819	0.146919351	0.329571959	0.382760077	0.423863619	0.586801664	0.573290592	0.396829516	0.328814308	0.192998656	0.104061764	0.14084445	-0.022811515	-0.224160806	-0.406522183	-0.534016558	-0.538415451	-0.587322342	-0.487180389	-0.289262487	-0.203986517	-0.152067845	-0.122569157	-0.233566269	-0.357270882	-0.534689001	-0.66034213	-0.702999985	-0.538032229	-0.511762208
0.082100835	0.153758655	0.30234169	0.542514249	0.580990508	0.557758544	0.523751298	0.196766634	0.057528323	0.161922992	0.294610875	0.134044823	0.04091335	0.23964826	0.285744346	0.435263248	0.31009351	0.189705533	0.130015794	0.09318725	0.068105825	0.115195825	0.007785846	0.243919751	0.44349788	0.53732208	0.615914279	0.481692143	0.333896105	0.190176603	0.080873775	0.051857385	-0.071415103	-0.164494071	-0.369567083	-0.53829699	-0.606187804	-0.605065349	-0.396877589	-0.195714119	0.027650497	-0.139503817	-0.209192336	-0.116521827	0.001324235	-0.163641283	-0.413773873	-0.344552515	-0.379453678	-0.265926659
0.035204378	0.162410562	0.250341827	0.307215032	0.387538313	0.49176698	0.464459441	0.458252585	0.356787858	0.349184793	0.371632988	0.411940145	0.653226738	0.769080236	0.821622253	0.958334505	0.858518506	0.736592907	0.587501316	0.402495402	0.419852106	0.357091976	0.399322142	0.491029815	0.602938395	0.432417865	0.445967618	0.352094373	0.291183408	0.221717101	0.030391525	-0.073571003	-0.044885283	-0.164432894	-0.283916381	-0.322359998	-0.434646712	-0.510680126	-0.447892251	-0.449803322	-0.363302701	-0.354219387	-0.387718835	-0.497844333	-0.671808003	-0.674367489	-0.786073527	-0.916765859	-0.818028938	-0.785893876
0.04599102	0.224029321	0.443598299	0.405787415	0.600366169	0.387050442	0.224623152	0.055204858	0.265618845	0.516801237	0.494652153	0.54757813	0.350805322	0.195038024	0.245307751	0.135150087	0.282635817	0.153445048	0.482310207	0.515793318	0.612505078	0.504059422	0.151817619	0.021932714	0.342771222	0.487946135	0.501016867	0.595957904	0.429081748	0.197777533	0.088245065	-0.043445519	-0.034371873	-0.289950666	-0.364978386	-0.515872921	-0.605595194	-0.492518194	-0.234083109	-0.16028732	-0.237136468	-0.573851777	-0.538755177	-0.588282581	-0.328105122	-0.279682272	-0.193923596	-0.168663162	-0.089018007	-0.196891515
0.045363168	0.218776828	0.348478951	0.395976109	0.419908079	0.655725871	0.610328792	0.671173667	0.836400957	0.925405581	1.059324034	0.870675129	0.940024268	1.153753854	0.917939779	1.05775706	0.934043697	0.991102812	0.879561984	1.003491139	0.704580761	0.944671409	0.840878694	0.7872714	0.98011505	0.623156115	0.440855003	0.590279847	0.313101918	0.118922125	0.107669488	0.020627604	0.009428513	-0.156624537	-0.277885929	-0.385862427	-0.44163116	-0.504878016	-0.581362411	-0.718909842	-0.758857924	-0.817725946	-0.820799276	-0.906964812	-0.880239393	-0.976569255	-0.955403395	-0.943968636	-0.993821646	-0.960609426
0.195046293	0.159240697	0.243114778	0.362807833	0.467146269	0.538193272	0.522497464	0.689550895	0.73797189	0.809856864	0.996515773	1.013645576	0.963315205	1.030368766	1.04590083	1.062045551	1.034077447	0.98170279	0.900569677	1.005939342	0.891674775	0.829262502	0.75045965	0.694582152	1.105296255	0.446365077	0.436646743	0.454126268	0.272192347	0.208599319	0.181679887	0.088654897	-0.006504134	-0.235853242	-0.375306286	-0.318286759	-0.539556042	-0.609193123	-0.531835696	-0.79631101	-0.928967057	-0.802002992	-0.904162767	-0.843988058	-1.171735901	-1.153753176	-0.953986611	-1.010209089	-0.981909017	-0.972092011
0.10519486	0.259750613	0.294235681	0.317649373	0.503840907	0.641753152	0.805752061	0.617462593	0.800040866	0.674282475	0.879215749	0.921989137	1.02170762	0.942775068	1.069581273	0.934577635	1.060835616	0.988611562	0.974541184	0.943788652	0.936262015	0.794392727	0.827829473	0.690413884	0.567568269	0.420186906	0.465355738	0.376230957	0.358094438	0.224798737	-0.002605068	-0.038359177	-0.03721745	-0.24602565	-0.473718118	-0.454713599	-0.568717247	-0.470668717	-0.664118414	-0.638133813	-0.813665419	-0.889729453	-0.817346982	-0.951311371	-0.958017344	-0.947075891	-1.130303324	-1.023974063	-0.937853563	-1.021436042
0.110379891	0.168532422	0.309463857	0.365993434	0.478025035	0.510813957	0.603866241	0.711787347	0.693941586	0.893763586	0.861827155	0.922266618	0.879458378	1.035004915	0.996976078	1.021797933	0.930978127	1.018823864	1.020641265	0.756529885	0.895312665	0.878739725	0.726265705	0.818711336	0.644178751	0.479067043	0.548403828	0.365760162	0.312749934	0.162299466	0.091501749	-0.063633651	-0.131952431	-0.209990146	-0.254466555	-0.44122207	-0.410048728	-0.600944915	-0.639514167	-0.675202954	-0.879664018	-0.799542584	-0.78346857	-0.918893521	-0.904370354	-0.969060081	-0.981151344	-1.03949258	-0.994797174	-0.932743142
-0.102759401	0.077180171	0.257466069	0.174688434	0.399002231	0.290858238	0.578267723	0.53484287	0.496788774	0.498829063	0.540588491	0.536222222	0.792275616	0.779794324	0.862044355	0.962162404	0.96826881	0.826112587	0.739228973	0.553166905	0.666526282	0.571801402	0.550921351	0.56907582	0.364945584	0.43238819	0.42261444	0.264019436	0.165017377	0.154813321	0.060083288	0.017753364	0.012921917	-0.102000878	-0.201138263	-0.281520715	-0.492550823	-0.483231137	-0.549229735	-0.589017661	-0.597410234	-0.575244956	-0.524908083	-0.671717614	-0.769796765	-0.771498848	-0.89015451	-0.933430295	-0.98039181	-0.92549215
0.035660593	0.290470959	0.221418957	0.358093568	0.520623893	0.597488046	0.647066946	0.665912399	0.792666374	0.792055504	0.724017195	0.872872875	0.952144637	0.965520566	1.068247246	0.919296187	0.949327918	0.892759638	0.856575432	0.990588655	0.910421618	0.841957047	0.820707182	0.743710432	0.826375241	0.577885593	0.394631631	0.320268066	0.273842532	0.127672286	0.045696602	0.072406585	-0.121817178	-0.321494795	-0.294876869	-0.335001954	-0.585419135	-0.692205368	-0.415083439	-0.792524148	-0.754855268	-0.739374329	-0.835699983	-0.885203592	-0.815119949	-1.092469489	-0.981533809	-1.015959169	-1.052361491	-0.990050668
0.092200908	0.261782157	0.273211082	0.305707417	0.422128252	0.550286556	0.609425482	0.734384953	0.747441534	0.840351044	0.905642752	0.923732161	0.976864505	0.943087825	0.930804007	0.927448164	1.030079605	1.063099529	0.917895389	0.927164091	0.86774116	0.85333806	0.7156695	0.708620313	0.666169977	0.56109708	0.526653641	0.327452139	0.357257828	0.19775324	0.003592204	0.012419506	-0.069062038	-0.183540358	-0.281785747	-0.330304302	-0.503233812	-0.582308178	-0.587849654	-0.662793756	-0.829369836	-0.86296458	-0.78718926	-0.896339083	-0.85961513	-1.072620895	-1.012861588	-0.996477204	-0.92182499	-0.958984992
-0.065574963	0.223187618	0.255333323	0.23951033	0.484364713	0.406794263	0.669737546	0.742080907	0.748225571	0.945338354	0.784558362	1.038063185	0.943628075	1.130143872	1.020972688	0.954674426	1.079767123	0.931495051	0.822013291	0.934293942	0.893508802	0.809697039	0.720423194	0.635109573	0.688304675	0.498300594	0.531998206	0.291315986	0.298719966	0.168183032	0.011589501	0.152525302	-0.089508146	-0.201318687	-0.489650367	-0.417616156	-0.526115584	-0.572704238	-0.605453462	-0.656377264	-0.781482582	-0.720107892	-0.874912102	-0.930417543	-0.975617178	-0.917432694	-1.027295296	-0.985732937	-1.022203783	-1.059743194
0.141147394	0.291527343	0.299961467	0.374326898	0.549394037	0.523408474	0.630777354	0.782196172	0.713483697	0.808502815	0.897598857	0.982876118	1.035524292	0.964475897	1.022745329	0.967898527	0.913020125	0.786958206	1.090488776	0.740138058	0.843069967	0.828435336	0.75856652	0.688569293	0.533023409	0.460550204	0.533218389	0.358966329	0.333455869	0.237649186	-0.003880539	-0.033476663	-0.097273309	-0.178440145	-0.280168014	-0.474108879	-0.407212139	-0.530827192	-0.620676936	-0.613194902	-0.767750545	-0.757053102	-0.808358382	-0.962517025	-0.958343362	-0.972993632	-0.86501402	-0.956883622	-1.084405624	-0.94425645
0.064403515	0.267690871	0.299475752	0.486393808	0.536284595	0.64556503	0.505998433	0.763792694	0.679502744	0.754823083	0.754280151	0.898791671	0.807502162	1.010494723	1.110961158	0.9708504	0.939977727	1.041575352	0.972874928	0.924947192	0.869606878	0.857711278	0.617713067	0.659858558	0.626047526	0.590795897	0.566586548	0.332506451	0.332167009	0.167949824	0.119229196	-0.027803997	-0.010904376	-0.197770252	-0.274805781	-0.441256369	-0.427476643	-0.621412467	-0.675067991	-0.789914773	-0.817176546	-0.697853356	-0.937622924	-0.881810685	-0.850261461	-1.006609828	-0.989523806	-1.112443263	-0.952867204	-1.048141169
0.074683417	0.168525874	0.343418839	0.3880173	0.499742885	0.650410218	0.536801416	0.737216518	0.817147589	0.81310861	0.887688439	0.986102613	0.938824784	1.005547368	0.957859381	0.994449698	0.957647651	0.960241702	0.945522875	0.900503606	0.899370151	0.805380319	0.761302082	0.651241955	0.671799418	0.676658756	0.458584636	0.44277481	0.324719215	0.221327403	0.167822746	0.011522241	-0.115862556	-0.113326339	-0.28976769	-0.376719859	-0.551445026	-0.601592309	-0.70715315	-0.595236742	-0.849287546	-0.896834537	-0.766946671	-0.89008067	-0.927605843	-0.912776975	-0.994362196	-1.060737866	-0.983373644	-0.976228391
0.133504866	0.194280352	0.350355262	0.407585142	0.434774777	0.545112993	0.664216419	0.789518379	0.769140768	0.814988704	0.842516789	0.964752165	0.945348	1.038645085	1.02786066	1.023732175	0.981281404	0.975159791	0.9499008	0.849931538	0.809882536	0.803952242	0.745428823	0.647100849	0.633884833	0.573998713	0.459548543	0.291699831	0.30031414	0.181851352	0.107075857	-0.090812813	-0.14845129	-0.318189684	-0.236186811	-0.301015199	-0.478315439	-0.571280431	-0.598600942	-0.698421999	-0.776475875	-0.874799854	-0.966413468	-1.032694216	-0.947909906	-0.856617511	-1.056314951	-0.978169516	-0.987229431	-0.932419343
-0.008521988	0.040485224	0.205756842	0.402778344	0.459489722	0.694644334	0.599656433	0.397423987	0.771542366	0.983263577	0.992372555	1.014437162	1.127080242	0.951545232	0.967216207	1.066225973	0.911769694	1.020377052	0.974014606	0.668572322	1.02822003	0.850264965	0.747780546	0.651408565	0.580104587	0.511522736	0.433068708	0.350233775	0.449792643	0.215448539	-0.0534385	-0.107882537	-0.030821397	-0.131972721	-0.413458839	-0.334603448	-0.29698776	-0.562796249	-0.629391464	-0.657083587	-0.764524951	-0.970162299	-0.948548911	-0.755273616	-0.661220034	-1.054854687	-1.016386203	-0.944905168	-1.069768886	-0.93805388
0.211210781	0.391774438	0.689176666	0.604866864	0.573088376	0.541728919	0.532175041	0.688864817	0.760872601	0.964579989	0.972161155	1.031064992	0.848139999	0.879970629	0.818186499	0.987352848	0.844588222	0.934476142	0.811965429	0.842939656	0.858374687	0.746479577	0.758367848	0.618670522	0.5669503	0.610107896	0.699899815	0.554377556	0.476241856	0.269219928	0.263810705	-0.057354749	-0.183794275	-0.374968656	-0.402580982	-0.634999272	-0.598321802	-0.63945129	-0.603675498	-0.599275948	-0.72534208	-0.826125748	-0.847699278	-0.893957648	-1.085655258	-0.968520571	-0.834955311	-0.958236081	-0.855805173	-0.754588382
-35.61479983	-25.17364525	24.55759727	93.84308086	55.80068752	-27.67169586	-8.268070172	-18.0575528	87.87908245	-33.24337829	-18.43744165	-16.62544648	-42.74976064	-42.34805379	58.83897946	-1.616569802	-16.90475687	24.6851198	-28.26147244	33.46018916	-2.813079989	0.024813701	6.835649335	19.07769814	-12.04303706	-24.18771017	25.16623232	-5.543409965	28.11172064	28.94098648	23.4375607	-19.68648538	22.38389791	51.53034623	68.29487681	-38.10496926	14.86207668	-19.13585035	-2.642227171	-36.9286369	-26.54430839	8.653619377	21.03795814	-4.96846962	-0.426971784	-3.342622041	37.30496979	37.88253904	63.51547504	57.18837102
0.184714506	0.169283541	0.445505614	0.468761001	0.544477617	0.570681811	0.714242453	0.723871108	0.813036453	0.948753061	0.90957541	0.919682148	1.078131679	1.008818762	1.059217315	0.979006952	0.957051653	1.060221539	0.99664606	0.891215442	0.910021753	0.828393734	0.807926365	0.63481337	0.258825057	0.616379153	0.460546864	0.365252927	0.317979613	0.091268025	0.13505011	-0.010265512	-0.100479355	-0.213076661	-0.283570738	-0.338367186	-0.444675661	-0.477921947	-0.669883295	-0.635814801	-0.864017397	-0.85161823	-0.829417354	-0.895118202	-1.081102816	-0.95766301	-0.971948194	-1.017289733	-1.005221929	-0.999189183
0.023203587	0.177420752	0.256761099	0.407555223	0.543655862	0.546693087	0.627920438	0.68824129	0.892058962	0.845685092	0.889937613	0.820414121	0.955699903	0.888408249	0.981497385	1.072535441	1.197120521	0.978874241	0.982902295	1.185998303	1.042469134	0.789856168	0.661813488	0.711661123	0.691873018	0.602675341	0.605599749	0.284217705	0.337343814	0.24492874	-0.011431088	0.126666954	-0.113139449	-0.097041606	-0.173042041	-0.424306462	-0.457964427	-0.55768303	-0.744433607	-0.722353297	-0.788506378	-0.897176448	-0.946669641	-0.882579513	-1.047203009	-1.010667134	-0.922008355	-1.070424767	-1.027445013	-0.95246691
0.049309042	0.157036604	0.266642493	0.390363047	0.497468097	0.459812377	0.578707817	0.622280259	0.698569873	0.76723276	0.857014321	0.88301892	1.053975937	1.021146081	0.938317238	1.001219336	0.900404295	1.073330678	0.963169827	0.921002711	0.905004575	0.768583837	0.761647336	0.74541047	0.689530516	0.666835674	0.424733678	0.434200381	0.25323214	0.178184389	0.108410536	0.07290164	-0.094265786	-0.223017028	-0.326694534	-0.363744538	-0.447910799	-0.56876628	-0.603063441	-0.778246339	-0.818128622	-0.799018707	-0.832416269	-0.979915608	-0.926739325	-0.990687048	-0.970278138	-1.019898575	-1.063106859	-1.015127483
0.138123922	0.211031075	0.26569692	0.455400121	0.559825072	0.497831262	0.657992466	0.716614532	0.774110056	0.845721608	0.836112495	0.975749818	0.908419629	0.970655221	1.06084673	1.002801398	1.030479804	0.911838331	0.905890461	0.985301536	0.876849269	0.814042245	0.764902926	0.628564249	0.543114893	0.594451785	0.471952981	0.393303738	0.31698783	0.201680356	0.125362776	-0.013030122	-0.096186106	-0.213466686	-0.255489603	-0.346325138	-0.51003098	-0.529823103	-0.580177787	-0.660067956	-0.793434428	-0.693819891	-0.902945886	-0.943585654	-1.004049238	-0.954117173	-1.046608078	-0.965573317	-0.931476341	-0.889104619
0.122853886	-0.122153992	0.39536112	0.415002327	0.423476903	0.497367929	0.589262012	0.522684585	0.811549922	0.921205508	0.941388399	0.948580807	1.004580697	0.877227597	1.102743153	1.09829435	0.947978009	0.971822443	0.903202507	1.103937407	0.838176425	0.997300778	0.698926488	0.863432338	0.729360983	0.495749215	0.478897033	0.324511347	0.26694441	0.228991097	0.318393126	-0.378378596	-0.075348888	-0.074225109	-0.130023552	-0.382683733	-0.396769	-0.487585553	-0.580278594	-0.77354807	-0.780707488	-0.862588686	-0.820712563	-0.844848439	-0.983567886	-1.055265809	-0.950480225	-1.186479369	-0.986749748	-1.016683729
-0.019175441	0.042407789	0.202008521	0.367298591	0.544486298	0.499529225	0.546847313	0.658960357	0.707652553	0.761936805	0.926293746	0.923592149	1.052977702	0.964619492	0.969597169	0.932556631	0.984264078	1.040736991	0.967318195	0.878207274	0.89089573	0.771932725	0.857558411	0.710224536	0.672829299	0.427432151	0.446419697	0.43530961	0.274319761	0.107037586	0.203461737	0.083337472	-0.114953915	-0.133364284	-0.330607784	-0.363999924	-0.446342354	-0.692660463	-0.574110592	-0.77899125	-0.907165526	-0.776473436	-0.928790433	-0.881699384	-0.974485215	-1.175407454	-0.992028738	-1.019282722	-1.081964891	-1.084932736
0.1683991	0.3359307	0.499307793	0.548591159	0.637213171	0.613364733	0.46655435	0.416222245	0.675241635	0.899662404	0.97160978	0.90436696	0.841064597	0.817061902	0.812812367	0.730304869	0.639899729	0.769794237	0.819689941	0.858658444	0.823978463	0.722095778	0.644276623	0.372599001	0.503435457	0.565270019	0.67447012	0.66162712	0.441539938	0.23865342	0.026693609	-0.016808997	-0.071104174	-0.345483795	-0.556078586	-0.575566619	-0.619594592	-0.650665419	-0.489615952	-0.300224389	-0.61803736	-0.727893744	-0.984746785	-0.846356477	-0.70464959	-0.885836648	-0.710625308	-0.710689794	-0.78837892	-0.751413021
-54.6635043	-2.425060981	29.72758286	-23.45914372	-11.76363401	81.16782362	0.064958574	34.97679801	-74.45102672	22.61405245	34.82378755	-34.60273814	62.04806939	-92.3731117	86.00041632	-2.688461768	99.20114641	-7.583500164	63.66362794	-42.40026733	101.172968	-72.6567049	35.51405754	-44.41216757	-9.849802159	45.38497039	33.61074943	-3.60860699	-102.1599499	-63.91717011	0.746389231	38.28840657	-15.76261713	30.04313285	18.02915194	-101.8487828	18.06907751	-12.6671503	51.70508932	-100.3152619	-39.24953918	-31.71404571	3.498342026	34.29040526	-5.936258278	98.74026207	60.64904093	-31.41694591	63.14735857	-35.11294671
-0.02134827	0.22523599	0.449669801	0.611446344	0.633208565	0.732880096	0.452029328	0.420151209	0.608801853	0.872899172	1.090460011	1.037147063	0.97017489	0.798041157	0.838138418	0.911664354	0.860174822	0.898233781	0.888200085	0.954396135	0.985835144	0.859299455	0.585838033	0.449323312	0.549683688	0.617208926	0.759453756	0.617855825	0.538289251	0.199101881	0.166986339	-5.17E-06	-0.152017669	-0.330705897	-0.498719601	-0.708364131	-0.730453357	-0.733421856	-0.448144439	-0.358566482	-0.660854747	-0.899933258	-1.009672662	-1.057997433	-0.901891531	-0.908054415	-0.869787673	-0.889674926	-0.813698766	-0.85271907
0.218943565	0.233378986	0.314571477	0.294028043	0.342161374	0.619945503	0.621494414	0.702478978	0.776556258	0.885854097	1.027245525	1.005937682	0.915632237	1.068481204	1.044738886	1.029561924	1.133763456	0.919100322	1.019097559	0.882700992	0.758375584	0.844430106	0.787052022	0.79900225	0.657693688	0.612701403	0.470657049	0.35125988	0.223201816	0.214086755	0.039046393	0.017924989	-0.191713356	-0.197686877	-0.308230521	-0.3068414	-0.442329665	-0.661634224	-0.698963787	-0.820456096	-0.83376835	-0.936692544	-0.942986929	-0.965678142	-1.066062191	-1.005173926	-1.118442815	-1.026036747	-1.106774657	-1.049191055
-0.762145281	-2.065627486	2.453118722	-2.595647023	-2.854381318	-2.468556757	-0.112730035	-2.158168869	-0.52301196	3.579020241	-2.506253084	1.184036025	-1.175244529	1.159846269	-0.586214782	1.405742673	1.543602478	1.654882253	-0.837872433	0.002724931	1.573400872	4.26772709	1.289525699	2.967194958	-0.42777689	-0.26668273	1.753132448	-0.045579545	0.140278754	-2.227639614	2.158904356	4.444879989	-1.002841965	1.149656714	-1.899505491	4.406616269	-1.448625199	-1.152193916	0.124184259	-2.534558979	-1.255751765	0.361038391	-3.422461877	-1.57866842	-0.654786646	-3.621104944	-1.800157868	-3.368734469	1.011472659	0.886701251
0.008971658	0.085615243	0.217489481	0.303325451	0.574114129	0.455716819	0.648070759	0.718582503	0.649731246	0.82175334	0.933378504	0.939010436	0.91443957	1.042100743	1.119385276	0.866661229	1.175868836	1.140859238	0.980483479	0.67228529	1.125115516	0.707055629	0.892511494	0.59859227	0.587162875	0.721542189	0.629180633	0.221128847	0.262202868	0.123571521	0.206674301	-0.328541609	-0.218502611	-0.0648551	-0.33297043	-0.308940447	-0.42184168	-0.375218905	-0.529079883	-0.751197258	-0.473979132	-0.856006253	-0.908460709	-0.854883556	-0.890201598	-0.95875444	-1.097394152	-1.069516135	-1.097350806	-0.980663396
30.9588347	-48.16174853	19.56200524	-39.92712919	1.285746527	72.94806347	-22.60047112	-116.6363121	4.76539522	-4.736032611	-66.18604902	-21.18939418	-15.50804689	90.12248221	-12.09821241	-29.33998557	24.22162279	-177.2120212	-90.19615444	35.6485476	21.32572808	-1.465743581	30.79912745	-5.589376599	-32.6859325	-30.1687723	-14.54039638	32.44469046	-62.9303602	7.364352089	49.17855839	-16.08192429	58.67440311	76.14674624	44.89466488	59.9881069	6.137536877	176.1066261	-15.54717967	-76.04323245	68.10212876	31.06062114	-73.88030067	23.29037395	10.78686716	20.96721575	-11.35640506	-2.912030034	-63.8792825	57.87822256
0.04225334	0.249524302	0.254332954	0.427641151	0.454526541	0.617370917	0.661398465	0.802675728	0.796897436	0.792456793	0.795505703	0.912834164	1.085485774	0.965285845	1.08590903	1.024184104	1.024955344	1.0301499	0.994863899	0.965880334	0.787689806	0.764277387	0.797219082	0.715656567	0.564775016	0.671819724	0.505076485	0.549039949	0.26206729	0.29768611	0.14054044	-0.080191448	-0.103127313	-0.098369493	-0.319654567	-0.461923344	-0.371744492	-0.621177638	-0.613876681	-0.714276996	-0.728855647	-0.833641842	-0.945906723	-1.046101646	-0.947846024	-1.015509243	-0.804050465	-0.897975305	-0.979057176	-0.970583163
0.097383616	0.273695123	0.339555693	0.326478719	0.437731131	0.556639879	0.584665809	0.662961123	0.855228804	0.921412397	0.820187695	1.032646889	0.920069285	0.937076574	0.989087836	0.949810607	0.964013488	0.850452114	0.984978953	0.9954009	0.842731314	0.856862503	0.751394254	0.789110448	1.01500702	0.574331077	0.524085201	0.414466879	0.201939529	0.09418894	0.115706943	-0.111534475	-0.17788753	-0.154837999	-0.285827679	-0.304511965	-0.512797249	-0.570991402	-0.674453382	-0.677729248	-0.758563675	-0.684744192	-0.817123147	-1.067975994	-1.054621659	-0.866051123	-0.92542703	-0.997989563	-0.879882842	-0.975648576
0.04180643	0.198478793	0.439993649	0.373131507	0.546981845	0.630355365	0.678528607	0.594818088	0.707343289	0.800660738	0.894245379	0.841769198	0.916996868	0.887693688	0.990623576	1.084214434	0.988557931	0.997144655	0.96537693	0.97561031	1.062596546	0.841661349	0.788330211	0.565289471	0.89614672	0.567088845	0.545130229	0.321752762	0.362935929	0.205169431	-0.004069279	0.039615328	-0.094777072	-0.182151494	-0.346570288	-0.39403749	-0.55256757	-0.649453858	-0.646538265	-0.632508727	-0.817111813	-0.847606662	-0.843479438	-0.743671651	-0.954046469	-1.165816652	-1.063936333	-1.088838765	-1.06313121	-1.072585224
0.042823772	0.249220206	0.461624768	0.636499635	0.740472605	0.579935041	0.534628505	0.437784372	0.617050907	0.815708559	1.042983418	0.977771522	0.980912973	0.854392894	0.85847367	0.773982874	0.937460205	0.837733602	0.836836541	1.035992937	0.896820927	0.860873419	0.61417211	0.413028654	0.492788096	0.63379137	0.75620848	0.689487768	0.476415861	0.245438716	0.060847692	-0.013741523	-0.049428802	-0.361390996	-0.445382818	-0.687465248	-0.726565308	-0.603165414	-0.507438088	-0.460488912	-0.64179182	-0.793245874	-1.037303576	-0.946831289	-0.91584395	-0.765369118	-0.885304906	-0.855038454	-0.967356344	-0.817396662
0.131765266	0.354073206	0.614789104	0.530711344	0.718894296	0.752406862	0.605864072	0.591849946	0.835879506	0.74060694	0.823285136	0.768761542	1.054007073	1.072260793	0.985573001	0.931684868	1.03747361	0.915418786	0.82479534	0.986594975	0.862854305	0.643010059	0.594311807	0.77835348	0.721902889	0.65881219	0.582425113	0.581453806	0.544442612	0.401609545	0.254911346	0.016094853	-0.251934302	-0.388176591	-0.450415741	-0.546250338	-0.559438509	-0.615505303	-0.644535106	-0.625529269	-0.618853943	-0.802192915	-0.823884096	-0.813062571	-0.842278557	-1.003168783	-0.830434543	-0.92381893	-0.779670401	-0.824893395
-0.019001992	0.206178962	0.396608572	0.22478122	0.445367622	0.588635505	0.617060503	0.739426788	0.74929154	0.878064149	0.937381028	0.976478432	0.973432866	1.129744324	1.014696234	1.0401334	1.059674422	1.054715136	0.96214228	1.061853244	0.865165333	0.873148266	0.80838398	0.65117388	0.606348109	0.620965029	0.562415091	0.418606941	0.275799261	0.121361133	0.101335927	0.16143725	-0.065176013	-0.117394312	-0.30616057	-0.522532857	-0.595758037	-0.57833083	-0.684473771	-0.665821719	-0.919360105	-0.940887259	-1.000810059	-0.865687026	-1.103529138	-1.195846713	-1.062306873	-1.114906011	-1.109089094	-0.996525149
0.09608091	0.188684667	0.286317564	0.431628133	0.377153304	0.566151121	0.693622806	0.723624764	0.871962571	0.631803538	0.776755897	0.777034737	0.94939227	0.987551863	1.114647757	1.062768128	1.03267905	1.008703091	1.042904006	0.938602417	0.838443169	0.927516057	0.850752254	0.857995646	1.044783824	0.503139503	0.613813159	0.449233204	0.26569033	0.253659587	0.047589635	0.016145572	-0.151354291	-0.189137348	-0.387843308	-0.313636045	-0.408877618	-0.631894917	-0.780098337	-0.770055474	-0.821609763	-0.903179299	-0.904214482	-0.991896814	-0.876338588	-1.001414904	-0.972225612	-1.065425585	-0.998992932	-1.081831593
0.244902402	0.226641745	0.34717311	0.319854446	0.40171718	0.407555331	0.68098562	0.798243012	0.755565301	0.842542563	1.073555607	0.838373741	1.019196546	0.911834731	0.940315413	0.980955965	1.000926	0.976200735	1.060443168	0.822689475	0.856959957	0.828264337	0.756222396	0.733869079	0.357298683	0.451236304	0.452884489	0.468071071	0.129513257	0.185514525	-0.012460809	0.034042629	-0.143668587	-0.205164752	-0.254602147	-0.311851834	-0.51228798	-0.460586139	-0.662935425	-0.630495164	-0.85425717	-0.803578167	-0.963117361	-0.972708433	-0.971304164	-0.929739433	-1.038457755	-0.916566822	-1.02112776	-0.845098072
0.063635591	0.123878644	0.289794313	0.36951696	0.443413965	0.577476309	0.538587523	0.676625479	0.781181357	0.883310411	0.925532944	0.874147383	0.929470854	0.972056932	0.99739409	0.982447459	0.984844969	1.011824156	0.870971349	0.889526049	0.825409709	0.761499809	0.791301613	0.655096055	0.662150375	0.543529443	0.523030714	0.423065572	0.346653784	0.167498037	0.014132545	-0.054534336	-0.112099593	-0.169481173	-0.237211938	-0.343455622	-0.482604309	-0.539119884	-0.692685511	-0.705251287	-0.680947854	-0.837707899	-0.95077312	-0.965925055	-0.984868313	-1.0385148	-1.020988826	-1.076234925	-0.992696136	-0.952519159
0.08108814	0.273610214	0.36670104	0.634946188	0.572278529	0.491868485	0.340669153	0.151283507	0.278470396	0.56388402	0.675974901	0.489793438	0.432803174	0.386220596	0.289869019	0.336409049	0.309185778	0.432964732	0.456558934	0.667136506	0.631654863	0.546204139	0.331593091	0.186807251	0.347335464	0.514859704	0.66625188	0.517887195	0.382542999	0.183440078	0.127100459	0.026264909	-0.027380966	-0.147764634	-0.388579891	-0.513568311	-0.591438331	-0.532788998	-0.207546154	-0.161262301	-0.29338756	-0.469320001	-0.626358955	-0.553525252	-0.358125481	-0.327569147	-0.286369995	-0.270671006	-0.399521954	-0.337270589
0.120290468	0.124273034	0.34873141	0.391904802	0.32145309	0.630634532	0.732453415	0.679382271	0.776499966	0.911365237	1.022699816	0.946456638	0.905791934	0.954178814	1.084232736	1.050018543	1.089309137	0.869912061	1.01413406	1.034777894	0.889970841	0.948180263	0.88590186	0.689808979	0.627317924	0.582308689	0.387924414	0.37678672	0.242798445	0.305778477	0.233617556	-0.008993174	-0.154090172	-0.241218693	-0.367616239	-0.360488391	-0.432587836	-0.463796316	-0.728956092	-0.679274032	-0.799038606	-0.870590659	-0.833547747	-0.98019021	-1.126228336	-1.061159895	-1.049691569	-1.15450311	-1.156769436	-1.108874701
0.15332699	0.198919293	0.27362592	0.375928452	0.497959095	0.575593598	0.599321736	0.833364874	0.726558799	0.838093273	0.843641129	0.93757725	1.116796169	1.034027945	1.01580324	0.898705786	1.049736447	0.974141592	0.993987519	0.930598692	0.912567442	0.83655722	0.834952337	0.745479716	0.716229559	0.60482836	0.487031276	0.392396689	0.29770098	0.200069273	0.016046462	0.000521607	-0.179436411	-0.135768826	-0.198767646	-0.406926444	-0.494970831	-0.62022475	-0.583674444	-0.746346159	-0.918308203	-0.910431185	-0.939138064	-0.975977439	-1.067194752	-1.0311781	-1.053333386	-1.138370023	-1.189910001	-1.109593646
0.097073292	0.18948097	0.23542806	0.353677103	0.379564367	0.556258196	0.576507226	0.685011004	0.842707611	0.823029418	0.810138922	0.995257539	0.930762606	1.063119146	1.014621373	0.910800943	0.95321762	0.98931821	0.877013625	0.945213036	0.88722464	0.885844108	0.779284793	0.804553327	0.664889076	0.622441646	0.509567409	0.452489795	0.291714561	0.17692331	0.075358359	-0.009012955	-0.012006093	-0.214302806	-0.24556377	-0.376319258	-0.498761591	-0.47588314	-0.595414796	-0.676976305	-0.774050041	-0.950899586	-0.978005041	-0.898566745	-0.998768028	-1.016042027	-1.034040891	-0.964419617	-1.00710138	-1.062975091
0.014849857	0.17496382	0.400624441	0.530802463	0.447237508	0.506895049	0.339779632	0.173609434	0.368632629	0.589654302	0.72453233	0.578340017	0.400914416	0.278729866	0.295988552	0.286052892	0.419489008	0.368512914	0.496448266	0.464585711	0.489620013	0.58247663	0.338603679	0.121738309	0.292721497	0.607228029	0.648726751	0.616846066	0.407914293	0.072175994	-0.009351702	-0.105263521	-0.20556007	-0.205166446	-0.325656544	-0.505810662	-0.47934613	-0.500406696	-0.230305919	-0.174441306	-0.404107724	-0.527214459	-0.558003297	-0.53712716	-0.546368814	-0.264830612	-0.277866818	-0.299139247	-0.377906903	-0.321187398
0.23246845	0.403027335	0.469188405	0.622891355	0.602958045	0.730292014	0.486325284	0.738970971	0.621811452	0.77320054	0.88943809	0.929285382	0.914867402	0.898652731	0.940392391	0.935388681	0.967718704	0.971027532	0.941957763	0.889367818	0.767326077	0.777725239	0.736572173	0.72374697	0.542133852	0.566117389	0.730597169	0.535236454	0.443809971	0.462905314	0.315906323	0.041108484	-0.186120259	-0.362788012	-0.622008135	-0.709524112	-0.496368516	-0.618556315	-0.461148172	-0.586396685	-0.68825309	-0.865777478	-0.909533851	-0.936573419	-1.086377459	-0.95352381	-0.90274698	-0.912353004	-0.923910071	-1.005306587
0.094848641	0.155382814	0.295016716	0.444395548	0.516284238	0.494850019	0.679193921	0.724637421	0.727126737	0.823216422	0.890509719	0.848812533	1.053000316	0.952260431	1.042446264	1.103142704	1.047349705	0.956802396	0.82113454	0.909596983	0.909901696	0.811000684	0.817480347	0.829638121	0.784732186	0.544132771	0.486921302	0.340514591	0.350264205	0.293030737	0.163541691	-0.047708128	-0.1319234	-0.194509875	-0.283226139	-0.451811971	-0.442196193	-0.62779079	-0.704105576	-0.694211266	-0.836061566	-0.846243502	-0.957646737	-0.931804992	-1.045228043	-1.020660539	-1.059421261	-1.042329167	-1.075840718	-1.027997275
0.250786178	3.684177858	17.24715687	-14.72440916	10.58205419	-10.77492437	-25.59969583	7.318323653	1.713024886	6.243290141	29.27753083	18.63396237	3.017276991	-5.72078416	22.4376405	0.72030929	12.97205375	13.02682937	18.93428093	9.447039996	35.28860286	5.336582388	-10.75555993	0.718935271	-9.412190451	-9.497134664	-12.65615473	3.412170045	-6.295342532	4.012333389	-4.509410369	17.74399054	7.303560992	0.348532752	-14.82856381	3.414333597	-2.566258365	-16.84824792	2.466033654	11.264647	21.96396532	1.171488958	16.5131188	6.596205067	7.946437747	9.812322637	-9.922041387	-13.73210155	0.587191059	-26.45727274
0.113253168	0.140196509	0.351275958	0.43766394	0.576855821	0.49665625	0.656989601	0.813889289	0.768002321	0.740024463	0.815500193	0.91861197	1.010728096	1.020994373	1.091804054	0.961068034	1.053457377	0.988357149	0.853608351	1.005487167	0.94702664	0.895803479	0.68687926	0.694480758	0.320109681	0.548813125	0.4580465	0.346023325	0.299211484	0.190233703	0.199983742	0.092178752	-0.036478792	-0.162372897	-0.324981792	-0.270969516	-0.512331053	-0.431242037	-0.629148263	-0.858369005	-0.793796723	-0.828696759	-0.876943141	-0.997442198	-0.968386163	-1.130236142	-1.029640152	-1.086805275	-0.907896536	-1.006332379
0.290915899	0.378887558	0.44503751	0.65052477	0.683751109	0.548465968	0.650193754	0.620782797	0.632831055	0.728466824	0.800033606	0.909330716	0.979109669	0.872335417	0.902539469	0.773140748	0.957348115	0.955528904	1.004778203	0.864164949	0.999972963	0.779546735	0.742909081	0.827910609	0.529483309	0.590351856	0.572002489	0.483254793	0.52872969	0.426070523	0.139688752	0.114188115	-0.147440688	-0.32777016	-0.568878992	-0.57878107	-0.499594092	-0.710132848	-0.560839164	-0.62148885	-0.715446664	-0.818691915	-0.905885897	-0.946011061	-1.023069798	-0.994163831	-0.967589498	-1.005172969	-0.875855665	-0.96290937
0.203265117	0.183341507	0.296464883	0.388399486	0.51096829	0.53900216	0.68701574	0.748578501	0.800356447	0.789005461	0.778307413	1.058842046	1.138525896	1.005918834	1.03952416	1.062971573	1.021422594	0.992252004	0.889610656	0.936952823	0.834837098	0.716718467	0.812158447	0.79821438	0.711367764	0.66142588	0.491529004	0.447637642	0.303930211	0.18346832	0.065347418	0.25727166	-0.195049251	-0.22651639	-0.368356318	-0.455441543	-0.608134999	-0.715866777	-0.798949271	-0.805771355	-0.782642664	-0.753906032	-1.140571422	-0.925596297	-1.016819105	-1.13607146	-1.016460972	-1.072572763	-1.131566587	-1.216381719
0.03797009	0.078295209	0.238776436	0.366504619	0.516023285	0.528821416	0.68629843	0.579032148	0.564964939	0.881891442	0.972792657	1.224724752	0.837404532	0.990091349	0.838756202	1.011147896	1.012598899	1.104343734	0.983665392	0.963966489	0.829047564	0.849649699	0.907198209	0.648663375	0.78441807	0.597340004	0.42381814	0.428012844	0.097638653	0.225817229	0.161046515	0.041785478	-0.011696918	-0.274258286	-0.38060859	-0.466504057	-0.360787642	-0.532783467	-0.645126322	-0.887516402	-0.857195443	-0.989898687	-0.787127694	-1.029590585	-0.926187709	-1.227326153	-1.180920992	-1.218469422	-1.031534437	-1.171998983
0.083778739	0.303662145	0.367482814	0.604083799	0.723894261	0.514688738	0.383727121	0.227209509	0.451188643	0.636195687	0.808472189	0.728855677	0.698988832	0.667394204	0.565932815	0.64371812	0.599086623	0.643749077	0.699289296	0.840282097	0.719816868	0.741097843	0.452740638	0.257071886	0.479158099	0.588760538	0.684010997	0.599296507	0.42404261	0.255643582	0.086070021	0.075271179	-0.148688071	-0.242739334	-0.465660531	-0.572602858	-0.600809596	-0.567384415	-0.431067596	-0.239177385	-0.44153014	-0.644397794	-0.764842467	-0.797378053	-0.613962979	-0.686888653	-0.600241382	-0.59050323	-0.636273128	-0.606679167
-3.564309019	15.57798716	-25.94300547	2.420280634	-5.596054457	6.269830008	-5.866985976	-22.24572363	-20.83580692	16.33497503	20.20258109	-5.771014123	-23.17259464	13.19003377	-5.263277737	-3.533348226	-8.400028305	0.827775395	5.777630969	12.35154901	-19.52222125	-19.93258107	9.710952664	-6.163077327	-3.440878546	-25.47195962	0.382464225	4.976812894	-18.77617188	22.24920334	26.10412797	-26.50038482	-18.15893354	11.32282003	2.381738473	2.540675061	-13.27020073	6.273928566	-7.839037633	10.06985032	3.991061322	6.558852447	-14.74034446	4.024675491	-12.40289342	-10.64627817	-18.92347161	-7.865547569	1.914423554	10.12202917
0.027006479	0.033014892	0.269013445	0.326518567	0.416199216	0.428963422	0.475222872	0.437117157	0.585955673	0.533723754	0.562847443	0.622130804	0.702838042	0.800770477	0.958124481	1.051842627	0.91802285	0.870756675	0.745629493	0.741471783	0.57882749	0.481799963	0.477804643	0.548176188	0.38767901	0.402305497	0.504508592	0.388738002	0.272932742	0.147445524	0.203711945	-0.006757339	0.078114417	-0.084802638	-0.175190975	-0.305459837	-0.308047596	-0.403576305	-0.461000321	-0.478755176	-0.599433068	-0.4753373	-0.577159371	-0.702197026	-0.806604383	-0.863847337	-0.972332033	-1.011292314	-0.944799609	-0.94982899
0.066564568	0.195350675	0.299997935	0.433801253	0.549702226	0.549097968	0.692320752	0.6553176	0.735163416	0.889934798	0.88952599	0.912232682	0.998108021	0.999626202	0.903366718	0.97929542	0.978910366	0.962400407	0.912237855	0.928272878	0.844631605	0.883994309	0.717880234	0.722832077	0.620909412	0.69668179	0.416376834	0.402932978	0.296717021	0.179048343	0.128209572	0.045909695	-0.133755517	-0.142552606	-0.320878267	-0.384598021	-0.467618101	-0.593689972	-0.617620897	-0.714083612	-0.801813365	-0.799759076	-0.9097823	-0.904317368	-0.943501012	-0.949200564	-1.015351309	-0.982702593	-1.054952937	-1.034006913
0.132104023	0.269753225	0.151940475	0.297604184	0.480837177	0.332894281	0.587625269	0.577812527	0.761716195	0.813885221	0.894126661	0.852267023	0.970466979	0.905951332	1.0077556	1.195041222	0.995766524	1.139760393	0.799821682	0.955705378	0.958345027	0.826838208	0.841639373	0.64214122	0.660390319	0.593765718	0.419179496	0.433219651	0.308349851	0.156240546	0.03268653	0.103197394	-0.205249544	-0.16552836	-0.364084154	-0.40566381	-0.426657392	-0.538078397	-0.4358102	-0.96259062	-0.802955701	-0.745184386	-0.867977764	-0.94896314	-0.941784274	-1.085805964	-0.94235868	-1.154548753	-0.867759048	-0.952202437
0.103723512	0.199965963	0.312678128	0.49845587	0.506751052	0.521605535	0.386148017	0.271796577	0.20161984	0.136672444	0.053935643	0.143219682	0.234563889	0.447926324	0.509614824	0.715805833	0.621607164	0.488264778	0.27308076	0.127520797	0.052154705	0.142199617	0.221723356	0.371091154	0.466610985	0.552259896	0.579043531	0.412692642	0.396057243	0.109847956	0.074283015	0.089605908	-0.077985465	-0.134250723	-0.332239584	-0.420185902	-0.57737505	-0.617368855	-0.475857687	-0.309396044	-0.159607538	-0.074005845	-0.138448149	-0.168693433	-0.290583304	-0.575496191	-0.642680365	-0.637129112	-0.55540465	-0.484214358
0.041938744	0.178534385	0.266181554	0.359247912	0.609249877	0.512405387	0.666898616	0.714637744	0.818176192	0.984136206	0.83902526	0.874143379	1.063491476	0.919129482	0.98348034	0.93501566	1.027720092	0.962772843	0.938427225	0.945579507	0.951210617	0.912618822	0.733919892	0.784044307	0.825116974	0.619385206	0.552455427	0.338073595	0.422783444	0.15724817	-0.005107836	-0.076358453	-0.156019946	-0.109716662	-0.263861315	-0.481641865	-0.419107001	-0.558060644	-0.587340448	-0.848620963	-0.624473859	-0.814710072	-0.778476564	-0.958603567	-0.973965509	-1.038819586	-1.042496815	-0.967556022	-1.066357707	-0.930307347
-0.06035333	0.263406575	0.243440321	0.415460377	0.334148119	0.569268691	0.679667096	0.817549878	0.73056329	0.820216646	0.939618166	0.940422388	0.838701678	1.073653259	0.963952649	1.092735893	0.998619575	0.921417519	1.011596041	0.810655101	0.948334915	0.846230537	0.830699552	0.753695357	0.583485331	0.491157271	0.45508415	0.401499702	0.26369356	0.09516107	0.051127988	-0.053641203	-0.029308616	-0.088145899	-0.191392928	-0.269333692	-0.598419445	-0.532194608	-0.761642029	-0.74508881	-0.800486476	-0.795626106	-0.823418597	-0.882632522	-0.891963163	-0.921366174	-1.010315427	-0.926380473	-0.931983091	-1.054611698
0.039058744	0.497254018	0.665069914	0.680421171	0.624024909	0.740864182	0.694914221	0.723613084	0.641624807	0.760224022	0.761986371	0.790756702	0.903815151	1.027950441	0.85782599	1.016262091	1.020198918	1.077865639	0.999304758	0.799723072	0.697400999	0.662564666	0.738551229	0.54881847	0.680861071	0.706253596	0.789180355	0.590203755	0.557146407	0.363808814	0.132175964	-0.069286013	-0.340779974	-0.421132577	-0.623781622	-0.692952761	-0.785621562	-0.720806781	-0.8505907	-0.688875677	-0.652815087	-0.602800422	-0.641640321	-0.840062046	-0.900723247	-0.910109922	-0.872330057	-0.825414272	-0.864454962	-0.897198753
0.019469576	0.262583352	0.26110392	0.363752703	0.39466678	0.560776148	0.595472893	0.693063698	0.730845967	0.862754659	1.026956295	0.926740525	0.832782748	0.915177746	1.080397149	1.017885377	1.033786637	1.009685723	0.937193792	0.888067878	0.84218471	0.774426595	0.821251859	0.655350683	0.452601353	0.591871695	0.44687177	0.450717348	0.385841677	0.078099437	0.203270121	0.107410006	-0.0102575	-0.257268717	-0.296290588	-0.346838868	-0.419929486	-0.46636091	-0.721826277	-0.613643046	-0.662662838	-0.995675596	-0.92494969	-0.97100112	-0.911983237	-0.9829829	-1.035590224	-1.00372518	-0.985198066	-1.00894534
0.209465409	0.167508733	0.115923293	0.656848854	0.576268396	0.685972794	0.777197346	0.800958529	0.63255254	0.649767122	0.713942253	0.806035265	1.084788951	1.24087045	1.357906539	0.735506148	1.041491874	0.9759077	0.91013222	1.081568226	0.852024059	0.976136318	1.072739692	0.878869718	0.585146677	0.674023943	0.546552727	0.48409834	0.161362328	0.166649126	-0.02002311	0.03929494	0.035781834	-0.346368268	0.073307709	-0.472797668	-0.680289608	-0.625686111	-0.589147626	-0.836264479	-0.806993384	-0.942438106	-0.887207744	-0.989218707	-1.166488387	-0.999247714	-0.971638908	-0.944801471	-1.023361519	-1.01814761
0.032944711	0.168764516	0.303788679	0.35117471	0.479099494	0.548023971	0.624622418	0.689483193	0.869238646	0.853019923	0.805177799	0.949985288	0.889436063	0.968952784	1.071132379	1.006438772	1.054013913	0.953586475	0.882867577	0.975743324	0.884448688	0.81146022	0.771640626	0.664370674	0.626730587	0.515842379	0.44716782	0.358834126	0.302860475	0.069290591	0.136503007	-0.06576823	-0.212488951	-0.179005449	-0.359622489	-0.381294569	-0.522874224	-0.550363023	-0.588519485	-0.65998909	-0.784401959	-0.887450472	-0.756345165	-0.930910848	-0.967810184	-1.02444376	-1.033066706	-1.05634258	-0.936504747	-1.030248743
0.187501252	0.126759054	0.328379163	0.329838594	0.510412621	0.570140896	0.680866556	0.851619106	0.788768009	0.797947725	0.889868417	0.993086183	0.917573483	0.954706988	1.047696479	0.980533162	0.960009957	0.980261168	0.974708085	0.89668813	0.861015068	0.869552575	0.8988608	0.768650848	0.635370078	0.560996332	0.537010062	0.42697815	0.364987015	0.293547892	0.024453119	0.082667951	-0.021100005	-0.174647603	-0.275796805	-0.341888429	-0.490378494	-0.564089472	-0.683708813	-0.750388265	-0.880200957	-0.951386856	-1.013279078	-0.957444276	-1.026995043	-1.036008076	-1.108929957	-1.156777305	-1.171976453	-1.000016169
0.129779554	0.175855781	0.223065808	0.416168929	0.400981013	0.490915397	0.579084093	0.632735075	0.707956821	0.927842459	0.794267031	0.897720642	0.959483261	1.115494652	0.915156987	0.970626429	0.933056426	1.022954608	0.990020404	1.084261975	1.045072854	0.811850896	0.721248724	0.703008137	0.65633466	0.630372034	0.495755626	0.413834912	0.346956311	0.232054103	0.201988777	0.067106421	-0.056748642	-0.123741176	-0.364826026	-0.309301793	-0.462816947	-0.782148759	-0.644089717	-0.816536172	-0.751410564	-0.934595328	-0.957270281	-1.040168905	-0.997403075	-1.040705434	-1.004967689	-1.153135785	-0.9761329	-1.00679104
0.077122234	0.284488023	0.273827171	0.377383674	0.391829836	0.584255904	0.550959102	0.686155125	0.595519603	0.744095528	0.925108823	0.933839092	1.032139569	0.980450877	0.928300423	0.973072076	0.917583894	1.044518366	0.825803351	0.897325522	0.902124937	0.823574842	0.72519152	0.620552544	0.421897651	0.652029249	0.446354002	0.27778089	0.211712365	0.231123033	0.159827025	-0.018156732	-0.158956318	-0.163323749	-0.314377583	-0.391002596	-0.462459539	-0.428896287	-0.644438525	-0.73104332	-0.691802649	-0.744868436	-0.838545494	-0.998660532	-0.938980645	-0.96934345	-0.940144977	-0.954805276	-1.040384211	-1.131176191
-0.093410931	0.138695742	0.402332906	0.230760267	0.385949592	0.643871755	0.587066632	0.731121836	0.771884271	0.920402787	1.107275631	0.925511316	0.8836854	1.126011244	0.954665131	0.942201283	1.054702594	0.844111145	0.983810674	0.913659835	0.995160457	0.898047897	0.872259056	0.592841981	0.612297019	0.670169541	0.32174941	0.54687433	0.370912554	0.353513432	0.04949783	0.042014581	-0.041011857	-0.080565019	-0.302819307	-0.335156793	-0.436678076	-0.429690462	-0.759398248	-0.794010582	-0.720599062	-0.716155988	-0.805069695	-0.963775032	-1.088771742	-1.088471978	-0.945214842	-1.102629568	-0.906824093	-0.913362376
0.040582171	0.15761036	0.276841325	0.39535711	0.568250507	0.575543955	0.737518836	0.616042712	0.773434715	0.978226807	0.820358514	0.852231845	0.902952001	0.93734073	1.046208484	0.845538339	1.009911021	1.040643689	0.891036923	0.904787706	0.705143951	0.856163229	0.715247631	0.745543859	0.770998716	0.434905739	0.581818975	0.44131765	0.276003979	0.251818699	-0.081104819	-0.102322373	-0.231928178	-0.2408008	-0.419290477	-0.217788338	-0.379015115	-0.622314092	-0.507734806	-0.632710318	-0.652879575	-0.878529141	-0.885983049	-0.942521394	-0.881002188	-1.116086299	-0.973252974	-1.089987077	-0.951450082	-0.833794843
0.141172183	0.166641233	0.330402729	0.344350769	0.483777824	0.522369101	0.595732724	0.870705347	0.651380159	0.789279678	0.963618859	1.065590727	0.955293781	0.899091418	1.026069869	0.882307972	0.99870895	1.093028749	0.883143519	0.818981496	0.695108618	0.780775562	0.658611588	0.68953445	0.658605681	0.617397213	0.401306205	0.308778962	0.295709773	0.203878991	0.129049922	-0.046546624	0.132229051	-0.151710209	-0.24108041	-0.413500432	-0.497972744	-0.61790539	-0.590541791	-0.748878858	-0.979006067	-0.729332996	-0.846412811	-0.986729991	-1.041381967	-0.879702544	-0.956282192	-0.949189522	-0.871875677	-0.911210507
0.108205298	0.094966265	0.341865043	0.51722653	0.566729468	0.568749931	0.635244985	0.761607704	0.686957844	0.915856221	0.84535315	0.922828845	0.845414797	0.943866107	1.020150825	1.029528631	1.084289664	0.929673772	1.057734078	1.076366727	1.06243773	0.756047207	0.723309873	0.822054661	0.705178249	0.60722412	0.503740629	0.286234998	0.276408516	0.214137109	0.191118888	0.086208541	-0.025447766	-0.256866753	-0.337732218	-0.422335961	-0.572026053	-0.648367997	-0.54138028	-0.809736271	-0.719779119	-0.944241847	-0.846593042	-0.838261266	-0.947365027	-1.034884135	-1.217362307	-1.145800331	-1.033412737	-1.00992917
0.202615932	0.455253501	0.56123313	0.623710212	0.538495318	0.630246565	0.670212663	0.670344452	0.565613428	0.66594865	0.772867439	0.761068248	0.928058797	1.001096477	1.11929364	0.966390605	0.93217512	1.054609835	0.982253829	0.802255373	0.671657023	0.692142687	0.681767032	0.73796174	0.798566679	0.810434775	0.826435904	0.678491938	0.669056588	0.31911717	0.209744832	-0.069379365	-0.060790577	-0.453522765	-0.643262514	-0.674645181	-0.689661444	-0.811712259	-0.668116312	-0.628515609	-0.737821858	-0.580335444	-0.64680277	-0.71572355	-0.726918132	-0.992989381	-0.930813178	-0.847994078	-0.87384009	-0.841285563
0.132270741	0.439342387	0.506254971	0.537109026	0.683243865	0.783519438	0.706506942	0.680930802	0.646230763	0.758368584	0.760449722	0.83955747	0.843653113	0.9583726	0.965873316	1.102133758	0.861978462	0.925804289	1.097528477	0.790481378	0.740125067	0.817064836	0.726829626	0.691134383	0.824439128	0.649240288	0.6355901	0.560494263	0.481035388	0.269252924	0.075239993	-0.056774419	-0.358190657	-0.423494522	-0.460562202	-0.662636285	-0.672927226	-0.641772106	-0.763490677	-0.643933684	-0.808537536	-0.667601699	-0.712081119	-0.683113761	-0.754400934	-0.848891089	-0.779203738	-0.957301329	-0.878587452	-0.94925498
0.084144902	0.198983967	0.196541359	0.348537912	0.416528485	0.668040717	0.64999556	0.675230015	0.801580924	0.760502397	0.747226544	0.94988184	1.079123101	0.935244961	0.983147753	1.015833231	0.925055421	1.135944372	0.976220765	0.869677296	1.01632889	0.830392538	0.791839704	0.740616686	0.617531866	0.626336635	0.493157403	0.462504179	0.255435725	0.220662898	0.091937751	0.103687822	-0.105947371	-0.229362431	-0.358542679	-0.382379459	-0.432492913	-0.601131812	-0.675522974	-0.791846299	-0.841601625	-0.962262199	-1.003543378	-0.969518034	-1.015325071	-1.005128627	-1.046283703	-1.160662527	-1.106460225	-1.045783202
0.110399316	0.058745621	0.288343269	0.30135584	0.498686123	0.52210927	0.594669936	0.747838917	0.729775867	0.807011206	0.959054524	0.927143753	0.973361704	0.981125154	0.964662876	1.029087605	0.945497402	0.990469307	0.98159882	0.912487711	0.818916657	0.970273747	0.71456456	0.713115449	0.612894331	0.592172627	0.559114744	0.373739042	0.279730965	0.249381539	0.218918115	0.016340829	-0.104830541	-0.171726241	-0.2731749	-0.433074849	-0.550622712	-0.580327355	-0.670318007	-0.683130968	-0.778204931	-0.713568599	-0.90244759	-0.849850923	-0.992836803	-1.02943251	-1.08974137	-1.043905187	-1.022239521	-1.0490201
0.015759892	0.091781291	0.320486856	0.412511159	0.466354853	0.537841693	0.499559655	0.374487641	0.27494428	0.286800751	0.254289435	0.3010658	0.527051493	0.599370636	0.785090077	0.856378576	0.710838079	0.67732565	0.499152748	0.441033549	0.301898351	0.30711944	0.347070958	0.46088939	0.507647092	0.447793886	0.494780443	0.467166518	0.302101792	0.164451322	0.07767767	0.031330388	-0.022153178	-0.114651153	-0.301361458	-0.467646483	-0.493408593	-0.536056968	-0.44331463	-0.305852315	-0.348852597	-0.316130898	-0.224690428	-0.314819496	-0.462442382	-0.620903074	-0.786441227	-0.843310319	-0.717985479	-0.643417966
-0.088002252	0.165074864	0.263961497	0.415730898	0.493664361	0.545817197	0.637305717	0.655424743	0.773242004	0.840074348	0.850092993	0.909307696	0.943200302	0.951048508	0.981934071	1.122495121	1.026106331	0.918045075	1.085759526	1.042870423	0.964160534	0.87613835	0.775356943	0.699319269	0.606753212	0.539322493	0.462964103	0.38484016	0.322032052	0.198005617	0.082049334	0.061026873	-0.100396825	-0.147160707	-0.322177752	-0.359575579	-0.383931634	-0.422899253	-0.50117246	-0.627560075	-0.746302493	-0.734312433	-0.886234257	-0.976733865	-1.006151943	-1.047273397	-1.052396105	-0.92516609	-1.053117689	-0.913866827
0.067181323	0.28189868	0.349953168	0.335583504	0.346451327	0.654345881	0.77242914	0.662336648	0.61456548	0.797286419	0.891617181	0.959871234	1.016441732	1.152942018	1.076896468	0.909987621	1.054114665	0.929799583	0.910122431	0.846916904	0.891402573	0.809577474	0.692219568	0.754136024	0.735747349	0.449273404	0.41843565	0.481707951	0.246785001	0.183395163	-0.089622295	-0.036558512	-0.007733617	-0.127749984	-0.289010835	-0.473579388	-0.501349291	-0.607515947	-0.68600542	-0.704000432	-0.799329227	-0.988832481	-0.753403104	-0.908492341	-1.144513576	-0.950566962	-1.081347212	-1.022291392	-1.029029794	-0.984908342
19.67231857	49.47837711	23.18681097	-56.20887561	-11.62413496	34.00178463	34.55556131	-76.02094485	38.86159471	5.803244062	-15.54006008	-16.53664059	-44.62154818	29.40862817	-83.4119335	34.49604218	61.74128417	-26.81568037	7.493471199	57.47078442	-21.16135774	-27.43226688	108.575118	-33.20055086	40.02737191	-46.61387666	-8.616557818	-11.0491497	24.47915675	18.68987206	66.55051072	-4.194691232	31.96773437	7.744705153	-31.93994157	-11.9926812	4.132888238	-70.80776189	15.53536223	-51.02382125	19.87338389	-34.80857624	-16.40916168	-47.81809677	1.955753232	10.07967152	14.74892228	43.51286586	-49.83856785	49.19570061
0.074734742	0.181163773	0.25258761	0.336785191	0.472806886	0.562914782	0.548827541	0.657524275	0.853366687	0.752485278	0.944400811	0.94775346	0.802533677	1.067485882	1.033978795	0.989315118	1.024009685	0.985781586	0.981387497	1.00481055	0.835106955	0.884130647	0.617021647	0.626103681	0.995483267	0.518378087	0.368743871	0.38306466	0.370068655	0.2252984	0.049061461	-0.01854961	-0.188163125	-0.147748726	-0.339422431	-0.405415293	-0.396375184	-0.518854484	-0.590201883	-0.795730233	-0.847801256	-0.78044085	-0.805752094	-1.043593905	-1.045825059	-0.898897116	-1.022897755	-1.038925274	-0.9371401	-1.025220177
0.325120874	0.355899609	0.559950456	0.609418402	0.794042038	0.70877484	0.882941768	0.667670013	0.801634645	0.719952045	0.559595095	0.782844857	0.801391243	0.979050364	0.952568662	0.968761922	0.997385536	0.972521489	0.823410022	0.796191845	0.806653395	0.625800698	0.622796082	0.81387053	0.845269552	0.710533124	0.845951523	0.643732587	0.639278208	0.515744407	0.359638368	-0.109629172	-0.169535349	-0.290905807	-0.631077371	-0.757846163	-0.707710277	-0.66097737	-0.547797058	-0.736977365	-0.579218012	-0.705624699	-0.665731062	-0.721562295	-0.761163812	-0.871234781	-0.810437629	-0.811966069	-0.799656285	-0.841500581
0.09622999	0.145292444	0.312189111	0.441458517	0.347115279	0.494766039	0.748067832	0.848894746	0.882837222	0.857576635	0.92592185	0.905846447	0.895133651	1.044952959	1.016998999	1.015595351	1.051768422	1.038444133	1.000456485	0.955416822	0.959665675	0.893560202	0.814644676	0.795978074	0.534895216	0.606164812	0.430978424	0.273781859	0.353255897	0.226252489	0.068650247	-0.053782228	-0.04847433	-0.11093303	-0.373391256	-0.404640109	-0.531949258	-0.555856926	-0.683731234	-0.822304031	-0.824239595	-1.051114588	-0.815401265	-1.036400572	-1.005696363	-1.055644694	-1.021369766	-1.090545463	-1.059142209	-1.06845704
0.008098087	0.292693084	0.392433443	0.430407373	0.40087482	0.650141622	0.650042757	0.671731886	0.814121401	0.861072275	0.82739361	0.982447867	0.920844143	1.019131203	1.083970706	1.051416072	1.050878184	1.004507105	0.994928514	0.952825369	0.842050861	0.865904754	0.905410294	0.542124397	0.886173114	0.486678161	0.504042527	0.377759815	0.185675519	0.220887825	0.031002932	-0.078108369	-0.088245337	-0.206429904	-0.27706325	-0.456107168	-0.381145861	-0.668733515	-0.695306523	-0.667630125	-0.72346987	-0.912469662	-0.931457972	-0.93529724	-0.919615632	-1.067596143	-0.913089021	-0.972195718	-1.023788281	-0.931794983
0.06589191	0.203190161	0.215577595	0.410721505	0.465885917	0.569543627	0.612766506	0.717423907	0.862742668	0.876397095	0.954963935	0.970524853	0.976918527	0.942294865	1.036150287	1.013297802	1.00407835	0.970305248	0.970133005	0.958447772	0.906306623	0.839159706	0.729554757	0.671906125	0.636368389	0.577476215	0.517233214	0.314739487	0.360470533	0.19374256	0.106306215	0.037499251	-0.121630614	-0.110713938	-0.360115155	-0.454355045	-0.456038789	-0.618467888	-0.633548175	-0.769863639	-0.738051344	-0.861190788	-0.791198531	-0.884650218	-0.95482208	-1.008735955	-0.920146451	-0.933369613	-0.95393898	-1.035355832
0.032995319	0.181251032	0.332169916	0.588715537	0.531419806	0.42667476	0.207203085	0.115357694	0.225300511	0.43246712	0.514678168	0.557814554	0.321428763	0.245798946	0.244832251	0.197666354	0.158703845	0.255410742	0.403845843	0.55264475	0.548209259	0.458076751	0.322039715	0.055878886	0.214378142	0.429912911	0.524771316	0.538194018	0.368622604	0.240399098	0.071712793	0.025105648	-0.024527444	-0.230159562	-0.375587142	-0.508087334	-0.549997883	-0.444616294	-0.210610422	-0.064690728	-0.288188743	-0.540068357	-0.595419043	-0.515984719	-0.378806999	-0.284889906	-0.213761378	-0.182396355	-0.222105172	-0.260116086
0.072825093	0.264594569	0.529605656	0.628689748	0.751344671	0.726961912	0.561314875	0.49990531	0.649187668	0.891619945	1.094492026	1.051784604	1.050265392	0.933097904	0.917928288	0.94976324	0.882750978	0.868801297	0.933219618	1.090653096	0.968177689	0.953403842	0.66650766	0.396315724	0.480713206	0.767032979	0.732434904	0.680208841	0.518049441	0.304579386	0.166002551	0.079327498	-0.049285246	-0.286518548	-0.510919624	-0.722434014	-0.69463716	-0.59035813	-0.467601642	-0.395896589	-0.569346545	-0.924965993	-0.918980882	-1.063245674	-1.018222355	-1.001114228	-0.89245434	-0.890564184	-0.881257445	-0.833121538
0.138415991	0.057818786	0.336147274	0.313406469	0.514697101	0.57971716	0.487368262	0.679408951	0.796209332	0.870940246	0.943312727	1.163317704	0.889302745	0.966184422	0.96863418	1.066628171	1.066386478	0.78086563	0.949117941	0.854520048	0.897877792	0.874351397	0.695269172	1.004457588	0.59331702	0.573538101	0.526113551	0.42905566	0.2418543	0.177464073	0.225109437	0.224582149	-0.055428645	-0.272902611	-0.253720324	-0.37632888	-0.39696064	-0.494251745	-0.519203325	-0.937196012	-0.778234741	-0.965113703	-0.957821832	-0.90866705	-1.035509313	-1.080124526	-1.036713446	-0.956587972	-0.914189431	-0.917011028
0.044340298	0.070046434	0.158888079	0.256634795	0.382794296	0.403864902	0.419698313	0.57547527	0.577757689	0.570763943	0.662887726	0.656534976	0.824398309	0.996848675	0.949466757	0.951175482	0.98030716	0.835970282	0.822574861	0.728228138	0.62322942	0.635094671	0.530502208	0.560303919	0.516369424	0.481957141	0.357812915	0.305354824	0.227059417	0.075341008	-0.061835967	0.023758048	-0.024641641	-0.143712542	-0.146793554	-0.247336725	-0.394189169	-0.252129471	-0.422877494	-0.542070959	-0.554636748	-0.514400149	-0.656316286	-0.588193328	-0.736317245	-0.826793975	-0.950095237	-0.914456991	-0.998452578	-0.944453926
0.09387925	0.223036758	0.291702825	0.41302428	0.483976461	0.547932231	0.654366434	0.738953368	0.731880466	0.847297684	0.886910848	0.967751651	1.070683975	0.941236254	1.036930552	1.050143641	0.996833761	0.975722679	1.007680609	0.937278494	0.925026747	0.896149303	0.834899643	0.680594916	0.682129255	0.556897382	0.460437782	0.446733028	0.330008027	0.182385917	0.129511991	0.089309948	-0.109723729	-0.196319905	-0.284081674	-0.391967235	-0.537320598	-0.469869323	-0.707492505	-0.77153476	-0.858791735	-0.83476313	-0.840447107	-1.074553048	-0.982011358	-0.916238579	-1.069374007	-1.013615354	-1.080938044	-0.989259886
0.220823461	0.386553732	0.587518559	0.583546655	0.617010021	0.570674087	0.617971581	0.562731759	0.795617396	0.833514875	0.889977843	0.766047267	0.940184735	0.927406875	0.915326304	0.922098604	0.904499723	1.007146663	0.94185993	0.928132187	0.988700832	0.78146224	0.746232527	0.570447262	0.721946962	0.579161458	0.743506945	0.649740341	0.71569797	0.543704475	0.041627451	-0.087735785	-0.17720195	-0.412442423	-0.483320692	-0.56555169	-0.574428659	-0.559877686	-0.602770574	-0.586907518	-0.726894243	-0.962277374	-0.795233391	-0.81159586	-0.949561888	-0.958544831	-0.91726922	-1.021626576	-0.900017468	-0.96962282
-0.039710907	0.249586626	0.475179773	0.583651316	0.787481474	0.683821714	0.579171456	0.512806937	0.639868498	0.833609524	1.054702476	1.055710949	0.92951543	0.932670536	0.895371297	0.893646654	0.988309791	0.972230148	1.037766847	1.024850337	1.018863273	0.936342321	0.597125542	0.326483143	0.542478511	0.719372698	0.765721868	0.67036813	0.515118721	0.225883647	0.149535215	0.073995015	-0.125324262	-0.244772154	-0.484981891	-0.716947705	-0.731705014	-0.723509458	-0.494375146	-0.450823403	-0.627853711	-0.971911074	-0.940351316	-0.966155164	-0.92619083	-0.833553919	-0.862683532	-0.950214472	-0.887608997	-0.880567206
0.123980886	0.199208733	0.445810678	0.369714562	0.469014951	0.397912791	0.675275432	0.581379811	0.761776049	0.900212073	0.858790054	0.942451623	0.908954878	0.968951497	1.112569283	1.097944537	0.938230963	0.945267166	1.029110027	1.046968043	0.835982237	0.863953443	0.894505381	0.686577679	0.736093784	0.529133819	0.485324343	0.265507847	0.401852516	0.279316079	-0.012879481	-0.00042883	-0.131832532	-0.138527629	-0.309535911	-0.504009946	-0.485539972	-0.443620374	-0.694485653	-0.686876517	-0.862916007	-0.638787066	-1.028059689	-0.85781023	-1.062543488	-1.044767853	-0.920761432	-0.993077437	-0.880633449	-1.166568598
0.082766628	0.302246817	0.431942067	0.720014167	0.775068788	0.644912974	0.4175393	0.496221436	0.644519855	0.800801427	0.915525218	0.860191374	0.873402304	0.836776446	0.894495209	0.753058612	0.877127912	0.751074035	0.981349049	0.896594067	0.9934172	0.758647771	0.543571563	0.46306455	0.490833062	0.668055334	0.631546752	0.691867918	0.47507428	0.194026414	0.027500524	-0.050625045	-0.100502628	-0.224886145	-0.504181445	-0.6569625	-0.672626602	-0.655530932	-0.39328557	-0.437699055	-0.668971881	-0.847113226	-0.922851893	-0.95081474	-0.94510778	-0.814292707	-0.842969695	-0.800116384	-0.768404995	-0.870058063
0.23736798	0.241157941	0.298734799	0.367690549	0.495620466	0.434555321	0.57271367	0.74222882	0.891492517	0.641315074	0.861348918	0.924209418	0.953163281	0.92794234	0.902075115	1.056591725	0.919885654	1.121240556	0.904156489	0.767279506	0.918191016	0.811290115	0.735257613	0.858586362	0.658734463	0.610243001	0.367128238	0.468301149	0.309388426	0.131074316	-0.000693605	-0.121212927	-0.16545917	-0.164507807	-0.130320821	-0.408416849	-0.426966201	-0.47291165	-0.721794336	-0.702974764	-0.84385535	-0.799655321	-1.020792175	-0.842038489	-1.009207686	-1.063850247	-0.881049097	-0.972568838	-0.930977511	-1.052408176
0.084125857	0.169220882	0.45278691	0.58282004	0.76948131	0.703917087	0.42382795	0.433305346	0.692143074	0.881452425	1.08016707	0.995924603	1.022295044	0.831979827	0.801960406	0.987355588	0.888779574	0.924335582	0.868263923	1.035859382	1.006033444	0.869229029	0.659991646	0.46529602	0.523963682	0.672740988	0.73134284	0.634446102	0.512180528	0.279154231	0.127354975	0.020796979	-0.017474398	-0.254357449	-0.454707684	-0.644946902	-0.830760758	-0.731421561	-0.501759096	-0.424603287	-0.6666442	-0.887891663	-0.964742876	-0.899914799	-0.994311364	-0.858425314	-0.916479473	-0.920014138	-0.87158938	-0.95069274
0.142535313	0.275427318	0.285854137	0.327975605	0.424396555	0.572917841	0.719913875	0.719965883	0.734484868	0.744828968	0.807445079	0.894792445	0.984975922	0.903760879	1.017197686	0.979576141	1.01791133	1.081562466	0.998127418	0.852621184	0.820834632	0.830205547	0.797094747	0.5913782	0.614393329	0.643860872	0.461835201	0.358018397	0.27946555	0.178502759	0.175831428	-0.034843509	-0.14861547	-0.296744548	-0.342110188	-0.289629302	-0.236227252	-0.600866155	-0.524366234	-0.705674132	-0.747232937	-0.809470903	-0.936696921	-1.049985254	-0.958115723	-0.958186382	-1.190254778	-1.013455487	-1.05483773	-0.946108756
0.019397274	0.213984167	0.291735092	0.447578601	0.441524577	0.574755656	0.61968172	0.647336064	0.773170262	0.833017424	0.908286769	0.985849634	0.955425436	0.938312298	0.990014142	1.037721592	1.005838434	1.033567139	1.002363897	0.928017019	0.884830824	0.840357326	0.805393335	0.679163469	0.638743949	0.500436543	0.448411248	0.426146172	0.383466965	0.291465926	0.092327294	0.070536186	-0.136327406	-0.142044985	-0.263155082	-0.288232291	-0.479262361	-0.584537744	-0.626867237	-0.719565687	-0.723553512	-0.811273382	-0.823245073	-1.011083509	-1.015002256	-1.020362248	-1.013176354	-1.009555676	-0.949366442	-1.042510234
0.337350625	0.459190429	0.530016186	0.62661177	0.50020454	0.618756509	0.55643459	0.599892981	0.746505519	0.750267474	0.826960563	0.889974207	0.825495986	0.892157539	0.793873567	0.825836035	0.854487715	0.953547815	0.964334801	0.900238363	0.954784452	0.803073842	0.687302395	0.562431273	0.478472465	0.488953433	0.546910697	0.651793483	0.62834949	0.552344097	0.27075895	-0.113647571	-0.376401003	-0.550213334	-0.753413261	-0.541092367	-0.58251484	-0.591388183	-0.579069603	-0.597474097	-0.6906808	-0.944218952	-0.915757294	-0.93534252	-0.892698765	-0.744280879	-0.846291227	-0.860399997	-0.888997673	-0.982931548
0.1782552	0.220535049	0.317137552	0.382380453	0.55069198	0.435168403	0.550514193	0.712709616	0.797817517	0.746383441	0.909569186	0.741487989	0.9864743	1.06512413	1.022572059	0.888754107	1.024249389	1.03187677	0.95072408	0.841394539	0.8112611	0.845164512	0.730561377	0.687851287	0.621595198	0.563263967	0.459647138	0.378830614	0.224254495	0.189793634	0.075051472	0.008080321	-0.096786431	-0.114652133	-0.18524665	-0.418976766	-0.549317471	-0.59113583	-0.661660631	-0.616105123	-0.765153086	-0.762200821	-0.80842237	-0.895153529	-0.907297881	-0.883197627	-0.981807444	-1.073871587	-1.072818787	-1.023439247
0.167023953	0.120790319	0.26583867	0.437037725	0.4376605	0.607886735	0.684048228	0.678229907	0.863681186	0.805764308	0.84922963	0.905296434	0.93232914	0.971257836	1.005415876	0.926649831	0.968714641	0.936487047	0.996438484	0.875569092	0.874066356	0.858625633	0.797014264	0.756608833	0.631402066	0.516189292	0.447808136	0.346843015	0.279045509	0.118584523	0.112487742	-0.07625681	-0.12346562	-0.215331865	-0.228244815	-0.363197533	-0.407300879	-0.529963454	-0.655669041	-0.742735364	-0.755552333	-0.814224423	-0.91749632	-0.946247699	-0.95644126	-0.948287842	-1.04576466	-0.946964595	-1.015747747	-0.993758189
0.123638344	0.289436828	0.160771025	0.559794012	0.474386126	0.573133598	0.922435864	0.678088349	0.695745495	0.891503512	1.001057803	0.893191753	0.975969178	1.025119961	0.978079833	1.017233871	1.166636416	0.960631835	1.115058276	1.065684143	0.897802245	0.890468216	0.653503061	0.588329578	0.59577814	0.49077233	0.476555522	0.526233747	0.300108221	0.220855508	0.034111037	0.014367672	-0.21994382	-0.298716249	-0.290929971	-0.399958978	-0.484514608	-0.539819793	-0.721514553	-0.810520013	-0.88680895	-0.82962056	-0.823074526	-0.781922882	-1.006978773	-0.8834613	-0.961747669	-0.967971984	-0.793215682	-1.076671245
0.14905938	0.196295333	0.510898109	0.777699028	0.844101269	0.703106784	0.440335185	0.532014475	0.633835929	0.955558131	1.053575973	1.032745468	0.965609541	0.896247367	0.948911648	0.933195747	0.910728013	0.863272071	0.935795801	1.094517554	1.082374136	0.883486921	0.660401244	0.489428962	0.478832619	0.752863418	0.773539184	0.651888674	0.562442212	0.244006941	0.146212941	-0.004235489	-0.062824644	-0.274358217	-0.532321663	-0.625019795	-0.813069502	-0.68115523	-0.52973029	-0.462405077	-0.659536133	-0.945237021	-1.089577614	-1.112423649	-1.027690842	-0.979708289	-0.967862093	-1.00204956	-1.032112438	-0.960177846
51.23807401	53.8263844	-60.40145717	-56.19023106	-36.42882452	39.07878678	-59.86879517	21.30908293	-73.40260085	11.76653883	-4.044434129	35.69217521	12.66632294	-20.29289594	53.93398179	-86.07899599	13.82949467	59.40600389	-15.0936339	19.76485403	2.615878957	27.58381361	-57.30452432	-131.8741098	36.53443257	34.56727776	-11.45455958	-40.03202616	-63.28211248	-29.40512786	-46.94134539	-4.736206633	82.4017201	2.126879656	42.85354337	-22.24255453	64.73072921	-18.0903529	-0.671656345	-91.05038284	-38.05174778	37.41376833	-1.578116467	15.77431306	45.06215514	12.51583372	8.061059041	31.52924842	-3.163208503	-92.03357981
0.192086792	0.230479532	0.361109947	0.42241404	0.564369066	0.515805744	0.532594553	0.803466629	0.706502521	0.874728776	0.902599659	0.855956223	0.955543014	0.947376053	0.937260853	1.067838298	0.912008596	0.909744809	1.076696412	0.906562705	0.878358894	0.780427226	0.854341014	0.636799898	0.639884321	0.459066169	0.4524691	0.380404728	0.392065421	0.221345164	0.094639443	0.017739379	-0.146186359	-0.129788111	-0.418548382	-0.423365804	-0.433655848	-0.586132358	-0.729052921	-0.739660666	-0.788089141	-0.80078438	-0.893025311	-0.882337461	-0.884265324	-0.907976311	-0.938754962	-0.855792373	-0.95557199	-0.937170712
0.001095405	0.015867383	0.302865021	0.303858697	0.649212522	0.390439731	0.694984966	0.65702791	0.802049682	0.893549999	0.91107351	1.063093216	1.11096014	0.909489668	0.922559175	0.988351533	1.050374598	0.997784387	0.789336036	0.966406992	0.941620898	0.78571209	0.698922701	0.739835063	0.624465976	0.410262496	0.303143345	0.418309627	0.224980261	0.122571001	0.141521356	0.177486256	-0.036966531	-0.2196823	-0.220004112	-0.337469425	-0.502828964	-0.628125672	-0.713090012	-0.483069831	-0.795083813	-0.938815049	-0.94875498	-0.894653893	-0.961007616	-1.048391253	-0.848000736	-1.146758453	-0.987015994	-1.140887018
0.11671984	0.109471604	0.274101198	0.436226684	0.434744911	0.40518408	0.605040386	0.70982573	0.83180801	0.840984201	0.920348416	0.860339006	0.992061436	0.989404147	1.022427534	1.004146768	1.057277001	1.056252912	0.938297202	0.865347104	0.972312303	0.832144298	0.782381698	0.731650274	0.734902823	0.642934544	0.591262287	0.450683133	0.403810457	0.246101106	0.096027939	-0.046837242	-0.102189039	-0.167003384	-0.249462649	-0.395059735	-0.422097178	-0.547688935	-0.659969813	-0.820585614	-0.792699475	-0.89926768	-0.866591301	-1.025333661	-1.005659118	-1.124738993	-1.025720017	-1.066080499	-1.141903945	-0.988832433
0.240853908	0.056335617	0.291317367	0.40835056	0.389029468	0.520719854	0.708661165	0.66623363	0.653372301	0.758408095	0.915898919	0.972546333	0.950894487	1.000610532	1.008753632	1.002494787	0.976206267	1.031460623	0.985217116	0.933467898	0.933229795	0.843750755	0.817143041	0.770162956	0.367060865	0.558110352	0.505268269	0.346166581	0.275578393	0.317716069	-0.015779772	0.036265006	-0.098272453	-0.223061948	-0.245338595	-0.430237498	-0.470628546	-0.602814185	-0.578178545	-0.740726708	-0.679434697	-0.723454078	-0.946878724	-0.950628222	-1.03463348	-0.934657488	-1.036959528	-0.932733675	-1.076963045	-1.04450317
0.081319384	0.239413612	0.142706094	0.399437438	0.596423222	0.488500045	0.787018886	0.778218835	0.856142762	0.758029626	0.922206488	0.984720751	0.993254014	0.99432775	0.991404885	0.935087279	0.975700383	0.944641041	1.028418353	0.983437388	0.8812669	0.727078412	0.82194093	0.855428435	0.67435855	0.506102997	0.470991734	0.434693302	0.247101107	0.032172195	0.117538959	-0.024449838	-0.111808253	-0.331494283	-0.267576692	-0.482785387	-0.552554251	-0.641450003	-0.671954084	-0.717106346	-0.796612545	-0.828554073	-1.039249665	-0.926348662	-1.100052897	-0.898342931	-1.039909516	-0.940258664	-0.960284199	-0.941705859
0.30778867	0.114360565	0.275839869	0.285877523	0.517028841	0.428979346	0.734342561	0.642770545	0.711874932	0.702771215	0.879457596	0.857403995	0.868923985	1.036100042	0.947169259	1.044651145	0.908039678	1.029670652	0.943477713	0.82665307	0.928729142	0.795035491	0.905625548	0.739500266	0.708401027	0.588568421	0.507370062	0.342355734	0.168091336	0.387286725	0.071598077	-0.075166838	-0.03751458	-0.169590909	-0.281818601	-0.446886652	-0.354500249	-0.551108099	-0.79628374	-0.805815615	-0.781132908	-0.906882477	-0.989309054	-0.866933838	-1.06019686	-0.992044314	-0.961385034	-0.953337502	-1.085869416	-0.944873388
-0.044406973	0.202704306	0.464333911	0.307863529	0.492085467	0.532226529	0.692581489	0.726014477	0.729062512	0.854315406	0.898750696	1.049983961	0.921941439	0.995584337	0.903168694	1.063146023	0.928642239	1.157595411	1.037628422	0.777938501	0.827505071	0.776131659	0.754211952	0.712429018	0.876452304	0.626982987	0.568874864	0.448108569	0.211337121	0.225527213	0.085841014	-0.058634241	0.034193985	-0.252339655	-0.256591504	-0.298993562	-0.355605892	-0.500663659	-0.534570822	-0.718501949	-0.569191929	-0.762869784	-0.827396797	-1.050377038	-1.111944904	-0.949261794	-1.009009402	-0.99320867	-1.103656672	-1.007095978
0.148249519	0.155942693	0.291509054	0.461692335	0.44101762	0.63204881	0.6388736	0.730147083	0.73552255	0.858833175	0.899282928	0.963568797	0.915291532	1.184769275	0.991683922	0.878599592	0.904030135	1.037310964	0.974544983	0.939704256	0.926606694	0.962184444	0.637687709	0.636830784	0.941562227	0.612687017	0.564614696	0.530874849	0.394702965	0.103921243	0.215781299	-0.024649773	-0.203303233	-0.171680282	-0.287479766	-0.410659682	-0.47591265	-0.564895916	-0.693325721	-0.74465242	-0.892510469	-0.781469039	-0.764372304	-0.860042218	-0.950669963	-1.009810739	-0.954995018	-0.927616366	-0.917133169	-1.020260021
0.100940332	0.249100059	0.249154494	0.310441233	0.583460016	0.514632539	0.556832007	0.696860404	0.765963842	0.889285086	0.886278443	0.865682835	1.067643932	0.942328431	0.959567367	0.946025838	0.995865005	0.986784959	0.943598825	0.819822205	1.001321882	0.968915597	0.698990768	0.672231278	0.571064438	0.523448776	0.461058419	0.44580631	0.106642076	0.121415841	-0.088565849	-0.040024591	-0.030065399	-0.140497997	-0.25184811	-0.32317178	-0.473794498	-0.552732369	-0.655442898	-0.610428946	-0.708684058	-0.918482297	-0.831126779	-0.781269444	-1.000197166	-0.974341108	-1.05868846	-0.940255249	-1.021916775	-1.068139896
0.084778669	0.216946812	0.247626991	0.427301468	0.456829381	0.526410341	0.752074666	0.726447851	0.810511425	0.78369699	0.84222753	0.826121453	0.90697219	1.017237855	1.105105839	1.002756413	1.057790914	0.945586005	0.93021363	0.810136972	0.839681713	0.871246754	0.765571953	0.697701412	0.578641139	0.512730265	0.403805357	0.402575407	0.312639975	0.197320555	0.104665173	-0.018812713	-0.204232421	-0.185123862	-0.380152649	-0.378706505	-0.455006892	-0.559676556	-0.551841026	-0.731961068	-0.782319583	-0.77161858	-0.888964827	-0.935633629	-0.887803086	-0.919831683	-1.025618671	-1.037215932	-1.075347979	-0.958217695
0.015563736	0.243491807	0.335242102	0.377275227	0.533673331	0.587916113	0.599434179	0.68963252	0.831316029	0.847633567	0.886794333	0.895095869	0.948995781	0.968356995	0.939827081	0.925560914	1.086847602	1.020117812	0.909508156	0.880586818	0.92111782	0.797090365	0.799145397	0.711431027	0.672415841	0.566028983	0.537768425	0.392542123	0.357139671	0.202413349	0.154999816	-0.070193904	-0.211061816	-0.212105456	-0.242146483	-0.432550408	-0.363084075	-0.595230161	-0.519932863	-0.718857476	-0.784591833	-0.942051981	-0.943919959	-1.122819334	-1.00601835	-0.967766331	-0.965254554	-1.10409381	-0.943640122	-0.9678368
0.037697074	0.302587142	0.506295847	0.738153549	0.885820684	0.713342043	0.520435562	0.416829616	0.655516945	0.887009874	1.119643362	1.087009334	1.036201848	0.860095647	0.921119248	0.940608429	0.892865018	0.97844641	0.942024935	1.084707886	0.98634665	0.94265686	0.783119232	0.454377482	0.595568608	0.822547712	0.760408719	0.613923754	0.644170949	0.300972832	0.082564218	0.066012832	-0.072101037	-0.282226597	-0.446677928	-0.699784564	-0.739799941	-0.664738059	-0.565968437	-0.426479814	-0.708191103	-0.851969453	-1.015022621	-1.074546162	-0.860092204	-0.924334417	-0.907249648	-0.951940343	-0.952928122	-0.947762671
0.058008365	0.133945901	0.177806263	0.425089413	0.578107028	0.569865102	0.697584698	0.707140385	0.745832665	0.80524992	0.88338854	0.986266539	0.993820802	1.035733165	1.099894439	1.066987466	0.955446773	0.944692563	1.165105557	0.969157517	0.94169748	0.942011386	0.788758762	0.685663078	0.806711624	0.577086418	0.416856258	0.37373394	0.285836787	0.302851922	0.099655753	0.121383155	-0.048949844	-0.141512586	-0.312399142	-0.43434624	-0.410580606	-0.545754475	-0.774926791	-0.805805733	-0.739342789	-0.914434333	-0.924248443	-1.042760145	-1.056860587	-1.096734974	-1.161579596	-1.053866664	-1.086183544	-0.98909047
0.025865482	0.114785862	0.248470945	0.38198809	0.603058049	0.438137783	0.514244979	0.423467275	0.231513549	0.226277976	0.307208116	0.461115851	0.572244395	0.679522789	0.888514776	0.820414695	0.641665625	0.622597488	0.62058296	0.426712925	0.354440757	0.306476766	0.270913444	0.4565627	0.515638127	0.559817901	0.46705488	0.304175256	0.270457961	0.147160023	-0.017393678	0.000600722	-0.047519653	-0.140522596	-0.206091979	-0.34272776	-0.475068728	-0.498832991	-0.464295674	-0.487929069	-0.302975315	-0.249149302	-0.399943902	-0.462532414	-0.513088361	-0.71389078	-0.856379857	-0.766404152	-0.775583542	-0.666947529
0.030890685	0.266661929	0.393987064	0.356286851	0.478529992	0.542071781	0.637206732	0.801409852	0.627299814	0.82982953	0.902517537	0.970441715	0.978590408	0.905848677	1.009412198	1.062749669	0.94676969	0.956910657	0.965128244	0.919125709	0.791603113	0.738414	0.786266374	0.672687488	0.684387266	0.43653846	0.528823471	0.490721093	0.335065869	0.215089939	0.275632879	0.005631876	-0.199069197	-0.209654964	-0.276189771	-0.335204985	-0.401588699	-0.557122985	-0.568187633	-0.752624649	-0.794486297	-0.77356476	-0.827763608	-0.936011043	-1.003984848	-0.917972554	-1.029439104	-0.988333101	-0.928026565	-0.940674098
0.003886932	0.173255827	0.32455092	0.46570324	0.553148817	0.577561763	0.498713443	0.35549497	0.203697347	0.189855146	0.197986948	0.210327343	0.419960846	0.518190061	0.706957342	0.726468606	0.701713969	0.602234422	0.409940753	0.299499291	0.198438524	0.046820144	0.238860661	0.312817551	0.510185272	0.518626284	0.537340056	0.448198446	0.269268229	0.12489612	0.05557388	-0.005980106	-0.015992834	-0.118261647	-0.337946044	-0.43183908	-0.551839324	-0.46268635	-0.499632256	-0.383643713	-0.277740075	-0.142540266	-0.200871347	-0.24571834	-0.449552545	-0.568159967	-0.623087364	-0.728307671	-0.639770686	-0.505054596
-0.0541938	0.204659607	0.277424502	0.310698016	0.36695643	0.568209836	0.568230913	0.700445564	1.011988342	0.832727351	0.833080522	0.842252679	0.915643888	1.09864544	1.16001689	0.858820447	0.953523312	1.013436352	1.002302525	1.103898259	0.902139175	0.77709772	0.624895024	0.743600984	0.722487313	0.492379488	0.515379795	0.512670971	0.285708236	0.168857673	0.121259292	-0.223805162	-0.100928167	-0.228852272	-0.408363069	-0.312415789	-0.519466361	-0.588573271	-0.444124005	-0.783452812	-0.849991404	-0.682350521	-0.772121068	-0.918116973	-1.013262832	-0.786456677	-1.03752374	-0.850446654	-0.974071923	-0.989196936
0.203708052	0.091902646	0.236138236	0.383927325	0.389475541	0.53262479	0.653254753	0.771668403	0.884616886	0.808814898	0.969567277	0.92341911	1.198534382	0.906823335	1.101317852	0.991925664	1.098480316	1.002448327	0.889870359	0.932626377	0.863663876	0.947752502	0.461857427	0.701046038	0.693205474	0.625121435	0.447729046	0.366377064	0.174798651	0.137393388	0.218202697	0.020487487	-0.307935531	-0.1139094	-0.243694107	-0.400102717	-0.616843261	-0.59882247	-0.683036101	-0.800745578	-0.784596456	-0.968620741	-0.896048672	-1.01215927	-0.972720825	-0.926469628	-1.054690408	-0.992739962	-1.226708713	-1.045250261
-32.93886305	-24.77156631	35.99831257	-98.54987684	1.78273915	-54.61558648	-59.0967376	-24.1418286	57.12808813	29.14491205	13.05661219	22.55181483	-36.72175746	43.15111331	-31.49656874	-27.29510752	6.144564285	23.82894626	-23.39529742	-18.99639014	-10.97554897	15.1129681	94.60079085	15.52813641	-73.65386049	-37.14105346	-71.87089777	15.79256853	8.286466006	-25.37201663	8.468669645	-9.487568824	-51.76919215	60.71783528	33.35852053	-52.89338491	-70.464523	-26.92462903	-90.43854474	-11.31091283	0.852204685	78.77965567	36.8787776	-53.24159318	33.43357897	14.10132482	-36.93291698	19.51162228	-181.6612893	2.054620382
0.136951261	0.113537556	0.29794972	0.274679983	0.449189779	0.540869157	0.583497815	0.780061763	0.761804545	0.848798801	0.987133889	0.896784259	1.013846671	1.06412457	1.070959621	1.061838722	0.904603164	1.06904021	1.061634792	0.860608831	0.904196854	0.898805466	0.878469894	0.865773371	0.63544741	0.519739946	0.526526189	0.47079512	0.293582298	0.238618845	0.220868747	-0.040936971	0.033808794	-0.166949913	-0.310121306	-0.454271561	-0.567827826	-0.621598797	-0.679345397	-0.620838183	-0.771623111	-0.931667893	-0.948996409	-1.144241971	-1.007122575	-1.040451014	-0.978875262	-1.118492509	-1.10532541	-1.112419817
0.093762409	0.138029387	0.311710233	0.369004919	0.426838589	0.505848755	0.624058728	0.58523335	0.69685109	0.812506088	0.845411859	0.860840765	0.97753669	0.91777867	1.052749504	1.133791541	0.940357216	0.968983967	0.919263415	0.824498601	0.834230378	0.850557828	0.6980221	0.696667633	0.660454339	0.662946497	0.447292987	0.463967654	0.262485195	0.112049713	0.111800658	-0.010620408	-0.131325886	-0.206629602	-0.340130841	-0.334763748	-0.369908648	-0.385865372	-0.557690248	-0.759775005	-0.696166137	-0.82302306	-0.88656065	-0.829835087	-0.856787218	-0.895738536	-1.010861999	-1.024989035	-1.014268477	-0.900980058
0.092614032	0.271936347	0.248098847	0.277321417	0.403499418	0.582685209	0.689437573	0.623763551	0.752302908	0.915644395	0.86674367	0.844782065	0.990777863	1.060489502	1.15173233	1.018911107	0.960315439	0.849408327	1.104134376	0.996509826	0.920622633	0.857941811	0.777107707	0.675756001	0.598797637	0.650733526	0.413068389	0.400615029	0.298567778	0.191944131	0.108766812	-0.021123519	-0.03260023	-0.286018692	-0.298124712	-0.340620488	-0.493242083	-0.555194039	-0.551722521	-0.682333962	-0.689996809	-0.865711786	-0.866876108	-1.013762338	-0.959275731	-1.049659116	-1.04265101	-0.857869828	-1.016069652	-0.974535356
0.138572258	0.231554609	0.361707814	0.419913419	0.480717476	0.566898293	0.57481168	0.753129391	0.803789191	0.79630254	0.912798926	0.956217704	0.884721928	0.971099332	0.961267171	1.021838417	0.961348864	0.959557004	0.959092474	0.875755224	0.907553394	0.808181332	0.850505226	0.709960489	0.591960884	0.5520264	0.459320781	0.399183804	0.236196016	0.125692423	0.130683532	-0.091748385	-0.036364672	-0.21655976	-0.221803681	-0.318234	-0.429998042	-0.592518601	-0.619863585	-0.790113703	-0.724523387	-0.916064657	-0.881166285	-0.927700044	-1.021560731	-0.919844131	-0.87518526	-0.939927845	-0.923716517	-1.058074704
0.047746948	0.163022621	0.322381678	0.352831565	0.481788714	0.482633445	0.658489111	0.615344408	0.712672912	0.887978629	0.965458229	1.001237956	1.012794039	1.050033756	1.006970135	0.936334843	1.005487428	0.989419838	1.036392506	0.958170203	0.938458655	0.721279594	0.807505458	0.805526569	0.759353098	0.622852882	0.511206946	0.383629245	0.336769061	0.165824998	0.20453335	-0.012976948	-0.173843898	-0.25566366	-0.249655195	-0.334903389	-0.430798865	-0.653030901	-0.65959738	-0.692974579	-0.774945757	-0.818007634	-1.007667553	-0.843247807	-1.099793393	-1.010393422	-1.034122137	-1.096701251	-1.135619363	-1.091909821
0.267466425	0.449896922	0.616196442	0.591816536	0.715924086	0.771447937	0.662711508	0.688740645	0.607222597	0.761953279	0.727346507	0.805605975	0.864182221	0.959921216	1.030492875	0.996217232	0.878603703	1.049153266	0.853273967	0.859095497	0.664914914	0.68888032	0.732959639	0.733148569	0.731003628	0.75081209	0.695314014	0.597186936	0.474323622	0.586477093	0.120959218	0.079900887	-0.310809804	-0.496141502	-0.457616208	-0.718091621	-0.587515125	-0.749876592	-0.787544271	-0.589796755	-0.593476892	-0.602094662	-0.734083212	-0.832631357	-0.892448448	-0.733862196	-0.997361001	-0.89072789	-0.971323213	-0.826447411
0.128822185	0.227284986	0.304061462	0.365894275	0.408599502	0.57509634	0.586718792	0.778955452	0.797043874	0.8439192	1.004121278	0.929039705	0.97501949	1.009147711	1.018651954	0.946538631	0.973374118	0.985253259	0.955181053	0.979346209	0.973051353	0.836684698	0.7460898	0.639592901	0.541340691	0.577001898	0.563795287	0.35354771	0.241269331	0.265646795	0.21408591	-0.065650737	-0.105777013	-0.248448597	-0.268915728	-0.322632697	-0.475055698	-0.591507222	-0.621497867	-0.665123803	-0.725003766	-0.852086693	-0.86970852	-0.834944415	-0.933255027	-0.956838561	-1.054159154	-1.040228209	-1.099074527	-1.018268512
0.061081533	0.182661278	0.350840723	0.301483	0.427960452	0.537656962	0.631649403	0.796002292	0.758174937	0.83489045	0.855204095	0.770450344	0.845673244	1.037704716	1.074493492	0.957623933	1.010566231	0.96094185	1.041327085	0.89378256	0.920315901	0.888461502	0.771737618	0.636388346	0.55085442	0.464682473	0.586840504	0.340209794	0.243796735	0.053973445	0.132366837	-0.005880397	0.027192213	-0.204780118	-0.234138383	-0.433048033	-0.455795744	-0.665266391	-0.724923821	-0.76975499	-0.693452319	-0.86259567	-1.03702462	-0.869290975	-0.822660151	-0.99796922	-1.000931194	-0.949972358	-0.974888101	-1.00842975
0.188031042	0.187891468	0.223972433	0.368205803	0.37502029	0.494419385	0.65829428	0.877085528	0.797442053	0.818015226	0.816270695	0.98882437	0.945459072	1.03165813	1.070175323	1.047875274	1.002697916	0.890469022	0.976821138	0.923550271	0.837581334	0.862636952	0.811069957	0.76094946	0.645598328	0.600623859	0.485360854	0.304028336	0.171831041	0.219386484	0.01556764	0.017002336	0.040147633	-0.138430626	-0.266566631	-0.284536973	-0.463411677	-0.528957463	-0.632037713	-0.629925107	-0.733541957	-0.903370348	-0.863229911	-0.879456888	-0.921368481	-1.039546062	-0.894206757	-1.066946128	-0.984905158	-1.027094353
0.136408638	0.136129879	0.248715959	0.37481229	0.479096492	0.588608627	0.74166363	0.726328803	0.934106054	0.790272205	0.918790484	0.925748023	0.811320757	0.941057819	0.951785011	1.128091122	1.067614612	0.979785346	1.050184229	0.954065053	0.904882668	0.848022511	0.685321823	0.701353026	0.592652888	0.636569549	0.524920702	0.42224826	0.278564336	0.184372308	0.196529987	0.023803111	-0.252760184	-0.279923773	-0.353819788	-0.502115629	-0.460521246	-0.571099602	-0.55805868	-0.76778774	-0.767163037	-1.01018329	-0.803565965	-1.023519307	-1.149793073	-1.014189775	-0.931108614	-1.256971689	-0.980004969	-1.124961028
0.051792859	0.316735712	0.465415771	0.806503859	0.869154942	0.68366783	0.582508246	0.525077903	0.64680016	0.819724654	1.032302602	0.983762733	0.877448341	0.906545719	0.892775341	0.930744587	0.967070431	1.102363456	1.074904071	1.096888184	0.962495845	0.920825325	0.630651086	0.440471938	0.489476796	0.685663599	0.831537292	0.61146393	0.63006647	0.244845177	0.171331944	0.147026285	-0.017650354	-0.285494655	-0.488286326	-0.712990492	-0.81601307	-0.745862534	-0.610712429	-0.528163648	-0.74261636	-0.967030744	-1.032289468	-1.142056836	-0.876958644	-1.049682361	-1.041803916	-0.992587168	-0.91944752	-1.060488614
0.01831152	0.144012408	0.264791521	0.439172787	0.497598435	0.709773992	0.667228379	0.674125408	0.865312586	0.914342441	0.944527938	0.917683907	1.030559651	1.218430794	1.065894092	1.047071925	0.999898139	1.184831943	1.081350565	0.918849122	0.868441531	0.904409392	0.889072629	0.639200104	0.707446206	0.57438299	0.322043514	0.23731543	0.257838116	0.216244568	0.106777167	0.026183605	-0.098816845	-0.248466835	-0.32876633	-0.292219078	-0.494418188	-0.525235078	-0.713899835	-0.885036838	-0.879861785	-0.943657744	-0.855053513	-0.972161015	-1.074780578	-1.150948253	-1.024416873	-1.160266659	-1.222238157	-1.087136626
-19.70085249	17.92818617	47.86356241	-31.45365466	-24.54523239	19.60493629	-0.752076575	-19.47977863	22.56033799	10.00742514	17.8537236	7.500769987	-1.280541177	2.017936344	1.816362063	-35.39850187	-13.55281177	-20.12646236	-3.575901095	-26.73247498	-14.84751378	-23.95119111	59.68699832	0.548745346	31.3020116	-15.76706749	-22.40752495	-12.67861092	-36.74504764	18.83987028	-3.012376125	-1.238321949	-1.227744175	-43.08277766	14.80706667	4.249792532	-15.90041654	-7.561493708	-11.18041386	3.629337157	-6.819162937	19.67247619	-12.56107475	26.36386868	-25.35038573	1.366198773	-9.877812422	7.432567799	-20.13889193	-29.18242285
0.094713732	0.153058078	0.18243898	0.376882315	0.457504481	0.576412812	0.627651235	0.599017418	0.817950868	0.705979566	0.918902329	0.951077391	0.914792282	0.984911011	1.082278599	1.086529371	1.123302104	1.014022725	1.005228402	1.071641011	1.067691702	0.877459713	0.917100646	0.79692335	0.729916605	0.577694649	0.347610238	0.440284695	0.33272978	0.082308411	0.096097221	-0.055554396	-0.023862914	-0.206113228	-0.20994923	-0.357373918	-0.481331755	-0.55281598	-0.776513763	-0.792060284	-0.833332544	-0.812326539	-0.88089566	-1.025741901	-1.070917202	-0.993063661	-1.083783855	-1.019085128	-1.110622971	-1.030640868
0.190195997	0.170336961	0.370208063	0.32924406	0.372880815	0.479761665	0.689422783	0.815247604	0.783294127	0.808323221	0.881142155	0.987846464	1.031794206	1.070031081	0.995752968	1.040127111	1.144677759	0.998442367	1.054262651	0.934512858	0.835756297	0.889687441	0.730480095	0.808040294	0.669455928	0.501775798	0.419168998	0.465184095	0.258144117	0.023428604	-0.058260036	0.143937003	-0.086714419	-0.235648999	-0.252191701	-0.54934817	-0.493362748	-0.442013084	-0.591178113	-0.590896519	-0.796150059	-0.895416149	-0.938616899	-0.901625268	-0.9016919	-1.044790196	-1.037647588	-1.036522984	-0.958462498	-0.999137534
0.006695609	0.287554791	0.221411664	0.415854096	0.461384716	0.598145379	0.723975228	0.642053622	0.771963473	0.830244143	0.803128062	0.894892616	0.984374692	1.11785206	1.137620431	0.906699203	1.022446769	1.143116057	0.94302559	0.877592727	0.907229689	0.800881832	0.771108689	0.776644934	1.052449661	0.585050852	0.464451779	0.351760758	0.281644308	0.236097306	0.075220181	-0.044758293	-0.158302943	-0.232111753	-0.245450681	-0.247304517	-0.402340611	-0.372622238	-0.699927144	-0.656432278	-0.803181341	-0.794680475	-0.763266623	-0.999889239	-0.910838305	-1.004098791	-1.105951113	-1.008712969	-0.924915058	-0.920988793
0.044960068	0.138642884	0.38293617	0.360405636	0.416144103	0.526407087	0.666867717	0.753929194	0.717510617	0.849083191	1.048808291	1.181160878	1.063318579	0.783000079	0.968584808	1.016110905	1.245546466	1.037252642	1.022297652	0.770710069	0.916260467	0.671578587	0.843727502	0.796498814	0.701990196	0.532005595	0.303957392	0.369690064	0.302011873	0.117976562	0.151390015	0.021267988	-0.029916728	-0.319870541	-0.357671829	-0.30216781	-0.461465569	-0.618774133	-0.590066666	-0.735901091	-0.899171958	-1.044891158	-0.939033569	-1.076278046	-1.096795737	-1.000944925	-0.970057965	-1.057484601	-1.120172406	-1.019064653
0.014098496	0.168003743	0.139666223	0.276241674	0.402355516	0.565759283	0.47232266	0.462969796	0.433000844	0.427021811	0.591852664	0.589801641	0.815408778	0.878737104	1.051012399	0.937548844	1.027591193	0.834806499	0.809038533	0.63350677	0.582927788	0.517872416	0.44342133	0.550046039	0.349242267	0.428862283	0.395089741	0.253796856	0.233881986	0.072262717	0.027815559	-0.013156929	-0.025307471	-0.128314649	-0.261987922	-0.397072641	-0.271519153	-0.447616239	-0.494673042	-0.506366995	-0.396365164	-0.439517883	-0.714324497	-0.753872454	-0.762848491	-0.905638321	-0.842090035	-0.967808567	-1.090430767	-0.84321394
0.127813713	0.26198958	0.340192949	0.345535377	0.470063479	0.577991487	0.633196142	0.665393205	0.702711286	0.847741819	0.815758239	0.96403449	0.949394306	0.977013951	0.963188734	1.11058366	0.977315624	1.081725364	0.91993869	0.963563123	0.810684633	0.898484797	0.672411983	0.660387166	0.547465801	0.56074494	0.490972934	0.481596872	0.252940576	0.270284852	0.154549463	-0.030450104	-0.094470444	-0.223769983	-0.221952444	-0.356151629	-0.356747522	-0.513854091	-0.661797637	-0.625211633	-0.863425208	-0.798533108	-0.941677671	-0.988952134	-0.968022739	-1.060391103	-1.106128377	-0.974515982	-0.955696063	-0.900535884
0.066630193	0.193247943	0.266778849	0.336868665	0.401216683	0.54777468	0.60959186	0.662609887	0.780997447	0.770794305	0.882489187	0.946564841	0.996752783	0.931150707	1.064386219	1.063986416	0.970461091	1.001896186	0.919469675	0.897020057	0.861527232	0.717680521	0.84710892	0.733133762	0.657725518	0.543328346	0.337112189	0.40315983	0.276614427	0.301331296	0.101068738	0.011876348	-0.065969168	-0.153166428	-0.241245836	-0.389526223	-0.462763784	-0.683359479	-0.637172056	-0.668048178	-0.797775306	-0.813139279	-0.855513016	-0.931509927	-0.908733806	-1.025106415	-1.085702417	-1.022224485	-0.982349582	-1.006064285
0.00011634	0.258845273	0.372095169	0.415322611	0.467180464	0.529373658	0.597005606	0.654531445	0.770454135	1.035226332	0.82414941	0.977275059	1.004022486	0.968867519	0.953913207	0.912121399	0.984961647	0.949214695	0.997187196	0.963538037	0.819411479	0.75402039	0.753639643	0.670540938	0.20732293	0.651826723	0.551390065	0.463922559	0.209014778	0.206578143	0.115888985	0.007802264	-0.022163593	-0.145403635	-0.247823521	-0.342413174	-0.441631137	-0.538898793	-0.575485108	-0.789146817	-0.775796231	-0.958039261	-0.844560488	-0.923838415	-1.050166725	-0.945607985	-1.05605573	-0.882641159	-0.97301886	-0.845915929
0.054622047	0.294520396	0.214720161	0.50267634	0.457698287	0.538531214	0.548950509	0.815699889	0.714489809	0.802475614	0.929119197	0.822545504	1.155502212	0.955929461	1.004813633	1.00293333	0.928703867	0.949562797	0.901913353	0.952346674	0.908254343	0.744054044	0.620667185	0.885399051	0.310942137	0.464764746	0.356089559	0.467518565	0.17142573	0.159369401	0.075603376	-0.113858054	-0.127667342	-0.213971075	-0.401075702	-0.419044948	-0.423435196	-0.624067113	-0.634211847	-0.700233464	-0.957321252	-0.773743973	-0.876738089	-0.949577667	-0.90080939	-0.868445186	-1.015071786	-1.019746527	-0.901282552	-1.038201055
-0.023859551	0.179061365	0.236261065	0.428001107	0.516855857	0.529447199	0.618248011	0.729722512	0.831182877	0.882668677	0.973956328	0.981197482	1.005331303	0.957706159	1.016029728	0.965824231	1.052477077	0.992423288	0.942546151	0.948029273	1.033922355	0.859955104	0.871640497	0.753262365	0.648467023	0.570408582	0.485276094	0.360495138	0.287280133	0.265855639	-0.021005935	-0.095169455	-0.116078486	-0.231809612	-0.338742312	-0.47556675	-0.521273166	-0.604556906	-0.536989298	-0.754053367	-0.809692352	-0.866740308	-0.919310945	-1.070063884	-1.006692109	-1.041936949	-0.978732677	-1.050289222	-1.15287027	-1.06017378
0.004157145	0.153081894	0.129525001	0.295909625	0.380431142	0.434239065	0.582244505	0.675375224	0.783602174	0.874450194	0.860104369	0.988567498	0.919938928	0.984698097	1.009534968	1.088075065	0.983273556	0.976569554	1.000253847	0.988426108	0.863179723	0.913583631	0.831558875	0.679516889	0.561023929	0.545030624	0.509716221	0.427608656	0.303225418	0.115430457	0.101205994	0.009192297	-0.122165783	-0.253803493	-0.194873395	-0.393617196	-0.431026468	-0.547674628	-0.641940774	-0.735822429	-0.852563868	-0.910779816	-1.027415991	-1.008780471	-1.008253836	-1.0456354	-0.988490869	-1.137768719	-1.030639321	-1.059954576
0.132908455	0.323546831	0.294186641	0.273431288	0.463418092	0.497403277	0.574021921	0.725081193	0.741004044	0.837426293	0.717244198	0.858037761	1.054732818	1.009969485	1.06662705	0.982351585	0.924432361	1.004693752	1.113778096	0.92639373	0.89131581	0.951441173	0.890091286	0.831667518	0.603066892	0.53526863	0.422288648	0.393242218	0.38965029	0.298392759	0.184857844	-0.079221516	-0.123984435	-0.317044729	-0.335632928	-0.368701332	-0.437736652	-0.538283589	-0.469292966	-0.673286451	-0.6585765	-0.788098107	-0.841038357	-1.004181543	-0.940302504	-1.105890153	-1.066863687	-0.985961257	-0.960846848	-0.966156712
0.108552615	0.095141792	0.320417771	0.354976448	0.548888321	0.569199375	0.60329666	0.747188405	0.689540851	0.894575545	0.852373514	0.958075451	0.873584689	0.946308148	0.944164909	0.929357593	0.93526655	0.968294892	0.949991938	0.98575381	0.809509594	0.90059864	0.812536561	0.754066254	0.959880994	0.704628063	0.61938557	0.454864454	0.283975875	0.181721734	0.04499663	-0.020737451	-0.080779655	-0.069914644	-0.319793478	-0.387658917	-0.452139998	-0.601519136	-0.782693453	-0.772136587	-0.818925019	-0.840931744	-0.785542988	-0.898234088	-0.887705779	-1.002589785	-1.113328841	-1.046635427	-0.925286953	-1.05232036
0.119565385	0.178597619	0.271166115	0.361086645	0.407084369	0.519840307	0.72216694	0.662133023	0.870621849	0.801668522	1.061321798	1.071362497	1.061581812	0.986494898	0.950960132	1.053775516	1.048098964	1.002595054	1.141876126	0.94443571	0.841907831	0.8490869	0.748963278	0.695388994	0.717250936	0.529792657	0.43151154	0.412424706	0.354560858	0.17397161	0.062905314	-0.057477439	0.030001599	-0.130809836	-0.28101245	-0.411187919	-0.365339235	-0.524413043	-0.727960594	-0.772208177	-0.852841597	-0.774959602	-0.947913344	-1.039549483	-1.106523201	-1.016016621	-1.002976609	-0.96891007	-1.118810502	-1.001041128
0.066159807	0.12207359	0.373559683	0.44316514	0.446121603	0.510193169	0.733320343	0.703910406	0.706883635	0.825677643	0.880264634	0.979903686	0.8968027	0.97832316	1.044184481	0.929026377	0.987290486	0.995617073	0.92253133	0.980019013	0.837469459	0.812407195	0.808462616	0.653177579	0.614428601	0.586732085	0.453348813	0.427637681	0.261883398	0.205293164	0.021061612	-0.133849632	-0.121550842	-0.118173574	-0.279205761	-0.337804293	-0.442113153	-0.547272552	-0.698779345	-0.71973738	-0.728951015	-0.787760906	-0.855747802	-0.989636003	-0.992562395	-0.981353298	-0.96402517	-1.080964098	-0.96903897	-0.945421637
0.057322854	0.091910194	0.148830459	0.193797425	0.349125514	0.446881395	0.317335977	0.495486313	0.512617933	0.597783986	0.64788159	0.792984887	0.83901008	0.967201862	0.993673456	0.883831841	0.903149502	0.913922412	0.709138516	0.75079584	0.654660996	0.619770941	0.49371517	0.397665431	0.433387514	0.438627741	0.386680632	0.209574286	0.266023605	0.123355558	0.088960327	-0.02987023	-0.063804965	-0.024102517	-0.122827763	-0.276013008	-0.336014589	-0.350191264	-0.462369595	-0.492682858	-0.488762421	-0.521253056	-0.50211072	-0.621956351	-0.767401586	-0.809148801	-0.902605867	-1.031808154	-0.883553673	-0.871763138
0.078885944	0.223307563	0.328621452	0.488590238	0.574028074	0.501604088	0.387135466	0.148729251	0.066945256	0.243538883	0.321518093	0.188370648	0.031501634	0.098716271	0.214489815	0.27813358	0.290985944	0.110467782	0.073327182	0.232073072	0.279989797	0.222727895	0.106681796	0.176712136	0.429173774	0.531786611	0.613681128	0.539804114	0.390922004	0.205326262	0.047311112	0.004885888	-0.032321712	-0.168714452	-0.331812484	-0.484435697	-0.550113635	-0.501563302	-0.407841667	-0.164777983	-0.097288831	-0.221689221	-0.378790758	-0.211308057	-0.056622055	-0.11716439	-0.263949013	-0.308828883	-0.247020046	-0.130123527
0.053760433	0.271895316	0.429424312	0.395815736	0.430625006	0.494592751	0.623154599	0.627097927	0.821387188	0.990508743	0.927634178	0.982702984	0.987469626	0.992354521	1.034891386	0.982333301	0.98217587	0.839105717	0.94821204	0.898890569	0.873518001	0.802575975	0.850154441	0.602531733	0.42683603	0.550632284	0.503323818	0.322648627	0.404607641	0.281636618	0.166082362	-0.054350147	-0.179137292	-0.166195228	-0.243342225	-0.432505599	-0.415338525	-0.558417705	-0.558203449	-0.828986578	-0.829819973	-0.96708465	-0.934086823	-1.03133526	-0.959550992	-1.022545614	-0.982261447	-0.993584552	-1.01551312	-0.980473888
0.12389804	0.247840239	0.574588938	0.734097939	0.787572912	0.598791289	0.549671757	0.495012464	0.574011323	0.899537242	1.020519459	1.09356407	1.045550286	0.966849531	0.928191183	0.954917498	1.056693814	0.887921919	0.944264738	1.097951275	1.043699798	0.886464106	0.746266828	0.478708371	0.445990245	0.788051822	0.720635413	0.655912953	0.490925418	0.258250115	0.158567678	-0.04568621	-0.115927185	-0.223643411	-0.575913101	-0.691955736	-0.723562665	-0.743905902	-0.550143799	-0.44080655	-0.653222549	-0.932148853	-1.015496688	-0.950324672	-0.933805924	-0.986687579	-0.872717901	-0.87830693	-0.950558746	-1.022403769
0.02915006	0.126729859	0.190101147	0.189464164	0.422404999	0.311415613	0.548393391	0.551001116	0.486245775	0.509956883	0.756029544	0.703889433	0.895709479	0.774603589	0.955938883	1.054769464	0.957073986	0.847132485	0.857818186	0.798696246	0.633908015	0.594288101	0.546670163	0.378335938	0.428105618	0.541065518	0.323189387	0.158307071	0.150017381	0.025756748	-0.027445359	-0.084255161	0.004610289	-0.060952198	-0.164687512	-0.25199896	-0.449566129	-0.396222104	-0.542871059	-0.340725562	-0.623311603	-0.531130273	-0.505790525	-0.732563048	-0.798671424	-0.706264466	-0.879383881	-0.908838104	-0.870405381	-1.021139281
0.129044384	0.346712317	0.287771356	0.306791453	0.493156332	0.650230204	0.700585033	0.683041866	0.734021959	0.952101336	0.866394725	0.929893977	1.017361726	1.07453787	0.922366776	0.988948791	1.056850951	0.741016421	0.977019404	0.883663466	0.918794752	0.823919299	0.88490426	0.735028875	0.412515366	0.463702713	0.483051354	0.374737058	0.328781546	0.268967847	0.055134272	-0.184125725	-0.126508064	-0.114495949	-0.242753886	-0.355669622	-0.394979599	-0.538463058	-0.679095863	-0.682858191	-0.840470611	-0.799062292	-0.91526155	-0.897388274	-1.028274129	-0.961234209	-1.023302317	-0.883897525	-0.950904435	-0.938854463
0.011685894	0.297245403	0.356255612	0.269888898	0.498958731	0.59898277	0.674350098	0.686665577	0.77566019	0.922645586	1.033623696	0.837886106	0.981183145	0.887423197	0.81409759	0.967512385	0.976102874	0.995848812	0.907672017	0.927337755	0.951849297	0.823548829	0.698262974	0.639339882	1.079543092	0.569393677	0.436626918	0.436391583	0.330222934	0.204796825	-0.004931867	0.014998812	0.070949725	-0.178903912	-0.251157637	-0.506428095	-0.56167172	-0.558915906	-0.605234723	-0.747373164	-0.727920213	-0.75314064	-0.872574231	-0.884024118	-0.955368511	-1.044840555	-0.916948853	-0.970424974	-0.95348915	-0.964215962
0.059709474	0.284445956	0.354712354	0.343201728	0.471019936	0.542670205	0.663320535	0.709362164	0.753372399	0.794235519	0.940526484	0.823296767	0.866006049	0.95169392	1.052215628	1.022811533	0.970018575	1.045174799	0.966104089	0.918225338	0.845400492	0.846886764	0.794468069	0.766906644	0.601710811	0.518568823	0.478028255	0.41020384	0.284941494	0.113205658	0.027270834	-0.068327823	-0.10614896	-0.108753106	-0.308215213	-0.305368631	-0.450091817	-0.60067099	-0.603931454	-0.626630312	-0.712310424	-0.800515938	-0.847140775	-0.920799514	-0.932277078	-0.904866163	-0.973468258	-1.020784789	-0.968730096	-0.990147931
0.003467381	0.061938118	0.084779468	0.468729146	0.622675742	0.539763572	0.642948725	0.645216803	0.735076135	0.866361324	0.901019489	0.998754435	0.9080421	1.005646857	0.892961415	1.029610926	1.020066698	1.153599365	1.112984753	0.926819164	0.847961292	0.869709425	0.837640436	0.930718378	0.770570961	0.562846314	0.376264188	0.480549774	0.278111146	0.237991551	0.064241857	-0.102067708	-0.143156628	-0.274585134	-0.257723948	-0.238348217	-0.547269392	-0.77118403	-0.691223538	-0.823632151	-0.683339581	-0.820178358	-0.945782715	-0.992280109	-0.98119426	-1.035907594	-1.067773186	-0.954284377	-1.039574649	-1.159356535
0.241769584	0.331099763	0.621696092	0.758800042	0.829712383	0.787133656	0.739749721	0.70859228	0.679302173	0.733130141	0.697154719	1.006936961	0.852817138	1.075162831	0.888410369	1.049426962	1.03467562	0.999926431	0.953773149	0.833785286	0.769415106	0.834451611	0.758072233	0.730914159	0.695898376	0.857311877	0.918786486	0.688234408	0.514713243	0.413129686	0.294125081	-0.028625356	-0.215841545	-0.415800397	-0.496215423	-0.779253026	-0.693421396	-0.667046369	-0.662244925	-0.562908867	-0.551948901	-0.627643537	-0.707888956	-0.70138213	-0.704815783	-0.762368309	-0.919962517	-1.010463715	-0.884191229	-0.793751491
-0.060254474	0.1244857	0.246666889	0.433326587	0.49012094	0.529831417	0.472709574	0.521800277	0.372752523	0.356863673	0.386466117	0.531599866	0.656962023	0.759467127	0.79374047	0.870897838	0.739227309	0.745844484	0.581149246	0.487295457	0.496604381	0.332835186	0.284780016	0.367368269	0.435527877	0.497677305	0.425565887	0.459751574	0.309572758	0.10330072	0.036226881	-0.13220963	-0.079275712	-0.094841003	-0.236290404	-0.335320709	-0.428263959	-0.552092586	-0.476970666	-0.414412842	-0.403527732	-0.326718217	-0.377831512	-0.46767954	-0.572342187	-0.749964622	-0.820695862	-0.876347258	-0.779836441	-0.676224699
0.139711252	0.345907839	0.491275846	0.271186691	0.385265577	0.539743983	0.441842433	0.788407033	0.953649351	0.955164975	0.879382852	0.870292595	1.096283542	1.179771022	0.984601393	0.918078394	0.954549863	0.893454265	1.033641841	1.09677522	0.858345534	1.059057685	0.867225723	0.683696487	0.799336321	0.654940507	0.454258246	0.303479319	0.337558612	0.062738918	0.031497496	0.056123569	-0.1909405	-0.110366259	-0.031146288	-0.294370571	-0.332824324	-0.582905088	-0.69337262	-0.796264288	-0.757046388	-0.829686297	-0.832917298	-0.931381194	-1.037707794	-0.832048732	-1.16208307	-0.999339807	-0.727074132	-1.091708422
0.132619548	0.193981264	0.349596366	0.412759438	0.542552275	0.531889722	0.599431984	0.714761683	0.780161188	0.894581558	0.853843017	0.878511843	0.896856697	0.973326072	1.108965192	0.956891781	0.960806236	0.909498417	0.929304074	0.94055026	0.92756528	0.874991046	0.713605028	0.667656468	0.679966837	0.531480313	0.425958807	0.357770681	0.290999097	0.198381975	0.051089781	-0.027891533	-0.12395887	-0.226060001	-0.24495345	-0.398379142	-0.447616597	-0.557216157	-0.600140058	-0.711690588	-0.746889076	-0.842643125	-0.874679554	-0.886041353	-0.965275567	-1.020147362	-0.967038098	-0.940347615	-0.892604	-0.961284335
0.100074486	0.240116511	0.336095018	0.324161263	0.510621779	0.580392557	0.651509669	0.669653016	0.760992862	0.811674788	0.886683806	0.953727087	0.912844643	0.979479491	0.991118989	0.971671191	0.945775268	0.8881726	0.977431759	0.974476638	0.841726976	0.846814768	0.703829127	0.739758315	0.626634266	0.513577985	0.532037121	0.340020967	0.257989303	0.12325981	0.139421622	-0.003852799	-0.074367505	-0.245734749	-0.228288627	-0.448582462	-0.374066652	-0.574069244	-0.596656175	-0.746639783	-0.776731975	-0.770681349	-0.863308346	-0.95453675	-0.945784797	-0.982321264	-0.947412715	-1.038962661	-1.04210686	-0.988430238
0.399669105	0.49932432	0.485433682	0.609889895	0.719062071	0.705877423	0.726459752	0.647757112	0.676571431	0.5489729	0.808938887	0.772074913	1.006031215	0.924332411	0.940298255	0.896699599	0.96496756	0.996153737	0.94091437	0.865451046	0.81818249	0.762191496	0.701873396	0.797873682	0.737030779	0.6568265	0.729917996	0.603025574	0.510038632	0.437747595	0.210045006	0.113158888	-0.185931261	-0.434387491	-0.553992338	-0.676541996	-0.66290967	-0.837118943	-0.566148233	-0.74940963	-0.848812543	-0.536381983	-0.696007405	-0.682060631	-0.802005552	-0.836500711	-0.851588776	-0.8208574	-0.843812993	-0.826656468
0.075203537	0.177869094	0.315892543	0.382550467	0.509903284	0.610015296	0.724503561	0.707774433	0.773087927	0.960960206	0.836876464	0.909445983	0.956009882	0.957915975	1.030298553	0.987686561	1.048535374	1.02025982	0.846220823	0.988017801	0.927711006	0.74135893	0.753440311	0.671339939	0.619837043	0.595439312	0.48964121	0.390844849	0.253654561	0.175105861	0.075010885	0.024125499	-0.089026126	-0.240749744	-0.23553761	-0.37464352	-0.46691016	-0.514473479	-0.596691373	-0.611678146	-0.719592108	-0.789733435	-0.903145291	-0.918014199	-0.951812123	-1.045232978	-0.99035299	-0.99688603	-1.035813704	-1.015249477
0.185854613	0.252786028	0.436022282	0.434964975	0.468502858	0.491994927	0.675878999	0.802804844	0.853013217	0.725135336	0.86812875	0.934094421	0.993242742	0.944647533	1.088727783	0.808217528	1.055117135	0.984767475	0.922455572	0.920670449	0.986857617	0.867790845	0.745954463	0.7388094	0.595494634	0.559136106	0.511077328	0.409874879	0.355027837	0.176649693	0.096503558	-0.117943534	-0.030954759	-0.104617497	-0.161440059	-0.401030095	-0.456113663	-0.734194116	-0.559002367	-0.71661471	-0.763944285	-0.80675142	-0.961234384	-1.027429071	-0.893522279	-1.094983296	-0.961538078	-1.013097852	-1.0091734	-1.043964148
0.062823207	0.221386151	0.309157575	0.422941556	0.504407797	0.683665855	0.652047291	0.766468221	0.823975227	0.846163615	0.952330926	0.880323235	0.947068625	1.032375836	1.077489268	0.976155906	0.986454487	0.97487907	1.062213042	0.858712476	0.863530226	0.966625269	0.787837765	0.731497957	0.731576943	0.604456106	0.476380809	0.257537306	0.282520164	0.2086553	0.148343897	0.067882518	-0.060691342	-0.231401665	-0.217786493	-0.390628267	-0.425472837	-0.549738086	-0.742183718	-0.724796642	-0.874381075	-0.881153673	-0.913583232	-1.035014647	-0.988943679	-1.047729426	-1.025083522	-1.104788909	-1.115072478	-1.071391368
-0.005888067	0.08220584	0.335240109	0.361186386	0.450586049	0.487277696	0.495160958	0.352609742	0.43696447	0.421301942	0.455529494	0.4701339	0.633808646	0.862391249	0.82648877	0.856842575	0.863732577	0.720828121	0.650465333	0.482761003	0.379751876	0.345356504	0.382713964	0.446988124	0.50347046	0.5027477	0.336200268	0.444992651	0.26330931	0.146126507	-0.017948063	-0.050668014	0.014410066	-0.177551809	-0.154243348	-0.441168462	-0.463260991	-0.589435395	-0.519610871	-0.428489804	-0.333737791	-0.348460522	-0.402255019	-0.479875898	-0.626738218	-0.698329627	-0.898228157	-0.938448768	-0.784823375	-0.820183911
0.265900719	0.365915936	0.628893417	0.699628706	0.721646799	0.791769955	0.650412831	0.662064288	0.784010284	0.558863035	0.882275537	0.856281185	0.866192217	0.986035197	0.979625878	0.969063416	1.08702881	0.965270219	0.812747625	0.79517595	0.74175785	0.638422014	0.615249636	0.638211237	0.765858798	0.853244431	0.670336386	0.651144963	0.582398668	0.461461864	0.312363055	0.074825307	-0.164783643	-0.531061304	-0.59283455	-0.765999296	-0.66880914	-0.702243203	-0.716108625	-0.657322415	-0.75156323	-0.612486901	-0.569459832	-0.860864615	-0.814574178	-0.87413716	-0.83660061	-1.053428007	-0.881648731	-0.768609428
0.311799269	0.099422512	0.255554831	0.380061896	0.62373685	0.490141581	0.54639531	0.611694378	0.551901466	0.75052666	0.89942041	0.874015665	0.99992213	1.108876875	1.003818981	1.137436662	1.051623905	0.761198778	1.03166742	0.987042293	0.898386874	0.818883108	0.783756493	0.607017269	0.7317111	0.527168849	0.611432917	0.45698719	0.46627796	0.24778113	0.065901293	0.001254849	-0.205112564	-0.108054926	-0.321184895	-0.400477427	-0.400659273	-0.555008696	-0.719510752	-0.690831745	-0.68553738	-0.89575382	-1.00816931	-0.971983913	-1.174616527	-0.924543166	-1.024245798	-1.137320321	-1.076525513	-1.009307927
0.014825435	0.163082529	0.214971133	0.375840102	0.489468157	0.374636637	0.460406733	0.408042686	0.417476557	0.349730412	0.381468635	0.392318454	0.502220747	0.677965657	0.721170778	0.805224949	0.909221029	0.593715073	0.546143121	0.407827145	0.455526718	0.37519778	0.380857782	0.476265842	0.482592688	0.510055986	0.513592129	0.453572685	0.242023839	0.160027569	0.087394526	0.013191285	-0.092478263	-0.146667002	-0.310908693	-0.362649927	-0.578886067	-0.55856089	-0.473378117	-0.440690715	-0.269013148	-0.366835363	-0.188621704	-0.387886934	-0.513987259	-0.710467834	-0.898980202	-0.801906223	-0.728650796	-0.754774927
0.102555142	0.154881871	0.420317899	0.369660304	0.494510395	0.570825779	0.673365173	0.690177217	0.791665366	0.872169545	0.848720687	0.94341933	0.936875581	0.997721917	0.998556841	0.989632351	0.950432888	0.904761862	0.885777251	0.882324618	0.852324726	0.953136832	0.737406096	0.677849771	0.624513264	0.606213835	0.479740731	0.344386083	0.353669174	0.238691691	0.070780175	0.101791058	-0.091031917	-0.279361538	-0.320380449	-0.39969381	-0.377345225	-0.537338208	-0.55555183	-0.772661714	-0.754165359	-0.794851711	-0.834268078	-0.80416316	-1.00710671	-1.010016549	-0.916852928	-1.071025802	-0.886114624	-0.907579102
-0.042675398	0.091595863	0.245087935	0.464168406	0.392518361	0.563941485	0.481336667	0.475347905	0.372463683	0.405133842	0.361267676	0.464317256	0.563549679	0.740555485	0.805741395	0.850692649	0.864994044	0.773696219	0.573716526	0.529837427	0.350517603	0.377963714	0.367627644	0.440402963	0.500271397	0.44132771	0.482477337	0.441449237	0.281788485	0.214607764	0.030770904	0.016464321	-0.08298298	-0.117882972	-0.210390276	-0.388556814	-0.476567023	-0.493851745	-0.460948264	-0.414177715	-0.445716455	-0.356097353	-0.347718073	-0.441311458	-0.623343671	-0.725485727	-0.814227898	-0.828554335	-0.814834854	-0.711922416
0.043014281	0.11658931	0.163661543	0.358787756	0.463117186	0.689829321	0.540808642	0.70115993	0.875009616	0.931282836	0.789182132	0.911753306	0.947993508	0.905119666	0.937949321	0.871679931	1.133490308	1.008666629	0.904432194	1.001552161	0.921612617	0.907100711	0.848453437	0.799669863	1.03842782	0.620386066	0.358056344	0.20566367	0.267010562	0.074850967	0.145966237	0.045956913	-0.086889072	-0.261861662	-0.203320853	-0.419560844	-0.484409285	-0.626715102	-0.592703375	-0.584499597	-0.69466187	-0.685977816	-0.878030345	-0.850177754	-0.948111995	-1.029260556	-0.971075667	-1.032503483	-1.060217112	-0.987022876
0.040629239	0.177990588	0.368345811	0.449107811	0.556211515	0.55542341	0.441324936	0.296503126	0.132690751	0.007699617	-0.002999282	0.104165962	0.255035532	0.366473473	0.52472711	0.557791614	0.551132135	0.385999786	0.274076904	0.072955849	0.009196123	-0.007287297	0.184640724	0.338174616	0.452429326	0.564616766	0.610967556	0.48702631	0.346352529	0.12714923	0.110998688	-0.014456918	-0.04377215	-0.181145155	-0.303385873	-0.467195109	-0.550462556	-0.495523327	-0.449074679	-0.305924485	-0.106306438	-0.049650895	-0.026149269	-0.114930639	-0.243983359	-0.399718446	-0.595177524	-0.628100658	-0.51731576	-0.39635368
0.031702366	0.194611988	0.142598821	0.259069819	0.371638031	0.584875799	0.588023583	0.851380152	0.802901263	0.763403121	0.848693492	0.985226479	0.977668291	0.998303571	1.058628731	1.097288328	1.066401619	0.830191537	0.935458126	0.784213044	0.794372208	0.75495274	0.680173992	0.610660854	0.526924773	0.696615917	0.541987453	0.502448327	0.213145701	0.266281806	-0.003886246	0.010932239	-0.250360399	-0.199691985	-0.250232423	-0.306567494	-0.491545177	-0.585478882	-0.795354222	-0.743319118	-0.868689717	-0.925851008	-0.995970178	-0.942788609	-1.006614895	-0.964644234	-1.025041163	-0.999862004	-0.897471769	-0.973325168
-0.014226246	0.125501243	0.330202679	0.328119667	0.41195344	0.595108269	0.663202591	0.668922125	0.840544096	0.918801583	1.02617207	0.977669025	0.929946877	1.022840408	1.053311736	0.901961518	0.944886684	0.968405602	0.9512706	1.004096962	0.90580752	0.799639925	0.87889894	0.814393872	0.699220815	0.540889727	0.490757815	0.37936481	0.281217874	0.273312524	0.110838583	0.063313267	-0.12320618	-0.246427146	-0.265111301	-0.38261688	-0.470416461	-0.559311082	-0.628353734	-0.655330764	-0.907239703	-0.798424059	-0.941655208	-0.987605135	-1.101656713	-1.004224473	-1.153932848	-1.003099816	-1.040930531	-1.104606241
0.001017616	0.329844744	0.342487938	0.451812794	0.630788157	0.465200471	0.426377789	0.060957722	0.211649597	0.30355117	0.373913732	0.393233777	0.177967077	0.028316313	0.115806444	0.258102333	0.100193933	0.100670422	0.188127087	0.338806564	0.363222373	0.372139157	0.096323053	0.030088307	0.37360976	0.508512506	0.593281268	0.513875426	0.396606046	0.143108268	0.038383296	-0.062468858	-0.041347631	-0.189416188	-0.270603315	-0.481507053	-0.569318411	-0.562697324	-0.434692205	-0.028526081	-0.132841596	-0.233456943	-0.380258188	-0.305098459	-0.100638778	0.083397261	-0.079198973	-0.185367261	-0.239231201	-0.007835113
0.107563031	0.156565331	0.25585652	0.299734327	0.440750634	0.60828611	0.640870053	0.762170403	0.715364603	0.925910417	0.907525994	0.943410968	0.883800564	1.036379903	1.001911184	1.049376001	1.013937098	1.036564166	1.042654801	0.94819947	0.788899691	0.843322897	0.817256339	0.610513449	0.74666814	0.638570518	0.443893682	0.453884284	0.251582891	0.225728097	0.122944317	-0.147785828	-0.146616724	-0.270225816	-0.321555222	-0.348838464	-0.486452974	-0.401138245	-0.69760553	-0.797758154	-0.925475672	-0.685780713	-1.077688414	-1.039682424	-1.03752497	-1.032069128	-1.076587496	-1.054539091	-1.052589275	-1.155143853
-0.007255708	0.183478192	0.329399914	0.322748138	0.508115104	0.627825526	0.634422235	0.64021134	0.941724574	0.87418246	0.850525009	0.920189794	0.990653674	0.920828515	0.917857892	1.008544971	1.097040245	1.051572428	0.993128133	1.043689925	0.939665219	0.862758845	0.793128113	0.861885272	0.655877678	0.607711042	0.55714962	0.354675684	0.28433203	0.202128058	0.08899677	0.016197594	-0.137590031	-0.236808229	-0.306856912	-0.407207911	-0.391746344	-0.665240548	-0.709124005	-0.81201491	-0.920609684	-0.928365276	-1.021928843	-1.117328831	-0.997747707	-1.039072197	-0.929785038	-1.118282317	-1.165141774	-1.211831356
0.04057819	0.15667771	0.290782268	0.284005409	0.457603591	0.503412583	0.589577764	0.548820646	0.75046173	0.905821831	0.934898232	0.974129089	0.845707263	0.902450879	0.983070607	0.885566633	1.020985923	1.078045839	0.993810449	0.850063635	0.981118517	0.912773153	0.837368995	0.816013793	0.567686358	0.57176033	0.593196839	0.452044963	0.31056723	0.167000754	0.132749081	0.025303549	-0.014994173	-0.207627651	-0.156189943	-0.386188558	-0.52811892	-0.556178934	-0.64387695	-0.775606775	-0.708572052	-0.825383516	-0.928958133	-1.010598718	-1.085370896	-1.020046999	-1.050388016	-0.863620476	-0.894147649	-0.933044571
0.237730812	0.054197756	0.333120037	0.424314419	0.41007884	0.36233691	0.625490442	0.64104069	0.668148681	0.749650625	0.880074139	0.816117411	0.85976484	1.130437599	0.974236905	0.979555094	0.912776363	1.031563925	0.982791018	0.828553223	0.908071757	0.752076444	0.711542117	0.721226959	0.701845966	0.442875901	0.566120486	0.394709607	0.2827248	0.223151183	0.017077784	-0.008006577	-0.050708999	-0.301963355	-0.273402992	-0.463951132	-0.498555945	-0.611524569	-0.509848643	-0.808228782	-0.798349036	-0.930397781	-1.006338924	-0.876581722	-0.86915793	-1.017021429	-0.879023155	-1.066999202	-0.933160336	-0.927896419
0.205968531	0.146518789	0.404029018	0.532950309	0.451060454	0.52566812	0.66315269	0.746548534	0.680573415	0.767121618	0.835884991	0.879783833	0.964713453	0.955993405	0.930083876	1.013205785	0.99469399	1.024407395	0.990288551	1.020247782	0.864370175	1.025304587	0.786037229	0.701246397	0.688410071	0.555956771	0.467937712	0.322898996	0.246796147	0.189547088	-0.096682183	0.063480106	-0.040591742	-0.110813685	-0.163550693	-0.378721549	-0.49401159	-0.481350067	-0.66365785	-0.509227583	-0.876981746	-0.787387946	-0.843318765	-0.900428544	-0.816344013	-0.865972485	-1.00681914	-0.939471977	-0.990864846	-0.887132415
0.104103605	0.016401855	0.338311185	0.254406382	0.352401204	0.598815415	0.717500275	0.648443104	0.883992173	0.892485266	0.902989979	0.910256533	0.883256553	0.883384082	0.976632889	1.019360128	0.884869372	1.042713186	0.851095113	0.905586138	0.784389103	0.708592517	0.668148467	0.671041287	0.896579309	0.488840553	0.500390895	0.3649885	0.172927273	0.104707558	0.031884212	0.06169136	-0.071537428	-0.194735619	-0.405420272	-0.374377301	-0.552432888	-0.589503311	-0.735619517	-0.805529051	-0.664784611	-0.894957351	-0.876389847	-0.795740313	-0.930972088	-0.887720207	-1.01168517	-1.014671131	-0.881306196	-0.963456107
-0.042459498	0.042058771	0.152739575	0.419809832	0.466486414	0.448392772	0.474287282	0.377184798	0.383010597	0.394458782	0.329803932	0.518364325	0.55337809	0.703840955	0.818356603	0.817032264	0.83655133	0.73590813	0.636829603	0.527410661	0.417774324	0.326257319	0.343794478	0.468661982	0.500740305	0.492388458	0.406667844	0.406815394	0.254798145	0.139029028	0.032567555	0.051908839	-0.03116742	-0.160967212	-0.230637562	-0.435993251	-0.425468109	-0.521460439	-0.390977771	-0.498309948	-0.344288391	-0.415147274	-0.349218692	-0.484457638	-0.54649094	-0.685675204	-0.806068864	-0.865878192	-0.759262651	-0.718204715
0.031839958	0.266530852	0.242182156	0.418362992	0.481565863	0.524648333	0.605533868	0.692825729	0.795535134	0.787623298	0.85985125	0.920084257	0.883305044	1.003516441	1.040028831	1.137244829	0.995341934	1.082110833	1.076965963	0.958869314	0.823962978	0.820386881	0.81366642	0.755715355	0.693357304	0.654541578	0.565537196	0.342147936	0.246026619	0.218442012	-0.011520147	-0.021240741	-0.112388227	-0.284793381	-0.253214171	-0.520294098	-0.533703902	-0.627915226	-0.643621018	-0.666107295	-0.868716936	-0.827936595	-0.914130007	-1.036564365	-1.060278729	-1.103488132	-1.130760527	-1.057650619	-1.023984398	-1.06605465
0.084519768	0.177478641	0.23304054	0.372588353	0.439113815	0.548164437	0.545584661	0.732144387	0.82189732	0.898440257	0.913837039	1.034974234	1.057863595	0.965097828	1.0570512	0.952483262	0.986307052	0.916081427	0.772821865	1.014465111	0.916573885	0.828603557	0.734378684	0.653708242	0.436765416	0.537798002	0.446187707	0.332335748	0.251230768	0.162806628	0.08386635	-0.061082849	-0.140295042	-0.194937285	-0.325432895	-0.443390388	-0.513300026	-0.521154521	-0.617276943	-0.702787801	-0.759714976	-0.769434215	-0.798685195	-0.918663715	-0.903086819	-0.928903153	-0.945165729	-0.981413497	-0.989337685	-0.992357503
0.09460858	0.171434829	0.350253052	0.383520737	0.536344931	0.597824354	0.609954785	0.806086032	0.84288574	0.812028778	0.982141477	0.929680393	0.981889673	1.058502803	1.08350717	0.959326763	0.936284217	1.06258794	0.898571988	0.957823593	0.946086834	0.967886866	0.830485097	0.57850999	0.672702323	0.602657197	0.511575079	0.620013515	0.226915674	0.246321547	0.130589957	-0.072267549	-0.155895744	-0.12456991	-0.386181852	-0.455307096	-0.570827295	-0.565039945	-0.775692256	-0.641078493	-0.863055657	-0.856769428	-1.050144885	-0.962786431	-0.938095662	-1.01172551	-1.267908419	-1.173051164	-1.026531266	-1.066279324
-0.764429115	-0.11957065	0.512469725	1.348244557	-0.023476868	-0.235238484	1.399440011	1.173029245	1.500127759	-0.705706622	0.885182109	1.435695139	0.433399341	0.133504446	-0.073157068	1.333895209	1.885042191	0.079041405	0.448805186	0.023502901	1.336116677	1.316483734	0.613133964	-0.289105386	0.7686019	0.694582249	0.792184509	-0.259733999	2.100357519	-0.952760278	0.845485079	-0.206529978	-0.408088127	-0.739258473	1.041686719	-0.679380654	0.445419526	-0.267909094	0.088022318	-2.177108672	0.211100603	-1.70238894	-1.241849911	-0.164091493	-0.55757438	-0.403583391	-0.614422449	-1.522663621	-0.330557732	0.196971436
0.084033753	0.178930872	0.306185824	0.523306267	0.616834355	0.587470785	0.680419155	0.775391857	0.786388343	0.725882394	0.883776247	0.845666622	0.985561557	0.982419276	0.985171781	0.800247851	1.069153539	0.979200216	0.939784116	0.972770521	0.901455652	0.901795712	0.829143847	0.687135877	0.639734818	0.443226874	0.46850494	0.552048902	0.300509455	0.23828149	0.18058172	-0.153987863	-0.084281482	-0.080261599	-0.159962688	-0.273892146	-0.454553857	-0.644926241	-0.739892746	-0.760998884	-0.869261099	-0.848086669	-0.910023335	-0.935600789	-1.018261825	-1.173096204	-0.999358834	-1.125243396	-1.003749782	-1.073894908
0.084690102	0.121273392	0.252632782	0.456337677	0.492218009	0.632133088	0.689480609	0.710657812	0.773278028	0.818235876	0.916046168	0.970141089	0.971278857	0.968142024	1.033574347	1.123557809	0.87857449	1.018349871	1.005046726	0.871029442	0.900671174	0.834622393	0.864510886	0.776721986	0.656429027	0.649210927	0.428441497	0.411301746	0.385401265	0.183635737	0.163680991	0.093208309	-0.069461422	-0.229741191	-0.362612682	-0.473063397	-0.594966121	-0.552236532	-0.70570614	-0.691585567	-0.926411981	-0.856861668	-0.878079582	-0.975056121	-1.070427574	-1.106528562	-1.038582078	-1.070394998	-1.078003294	-1.105638853
0.086994212	0.153903054	0.26968049	0.39954819	0.488140312	0.548883798	0.497098729	0.423906987	0.392620777	0.354335702	0.387844563	0.413960878	0.501341103	0.651004405	0.808989937	0.769579811	0.798751247	0.700367513	0.537336785	0.465130669	0.283131765	0.308815249	0.390160798	0.448792808	0.496426271	0.429750303	0.49094707	0.466230105	0.29307681	0.145854045	-0.006006699	-0.061620839	-0.025949716	-0.110949014	-0.2716399	-0.420264891	-0.425987046	-0.531201573	-0.535522416	-0.426499325	-0.393802311	-0.285189381	-0.325050925	-0.374183993	-0.527726896	-0.641616361	-0.784169766	-0.805025077	-0.792601736	-0.727836929
0.243832895	0.299315378	0.165417389	0.317399468	0.560913425	0.516059808	0.638761812	0.628541253	0.879728601	0.952333225	0.87308684	1.08434303	1.058485715	0.907854056	1.079905507	1.208342113	0.94847029	1.04153363	1.0018577	1.011068094	1.017666714	0.896582945	0.880514602	0.647142877	0.653692189	0.672441161	0.436930978	0.321252694	0.389040003	0.201020798	0.029829529	0.133729339	0.006586181	-0.152355619	-0.360872858	-0.396568064	-0.540569588	-0.54793712	-0.700137676	-0.75706356	-0.894457253	-0.836593498	-0.98145572	-1.048747648	-1.052489349	-1.044335463	-1.048054214	-1.063777592	-1.022629973	-0.992490292
0.158668186	0.186935957	0.285707656	0.304853913	0.505928881	0.596721752	0.582541781	0.691780165	0.743620836	0.960706636	0.885290122	0.903864009	1.041614524	1.082654934	1.057004963	0.993159326	1.085564446	0.85518874	0.906673924	0.832479221	0.868986043	0.8911408	0.796803457	0.78635427	0.470120168	0.48828789	0.655474534	0.49303003	0.328566942	0.222966948	0.120184027	0.04684897	-0.058913385	-0.202781697	-0.329865348	-0.340030537	-0.423781826	-0.588932507	-0.647816469	-0.751844537	-0.832570698	-0.847135252	-0.787691715	-0.87693179	-0.94686253	-1.000703564	-0.966674002	-1.021178069	-0.917970185	-1.068728791
-0.001007042	0.1660672	0.283976387	0.314979228	0.411595611	0.480820888	0.647438615	0.744443196	0.842749336	0.791774483	0.924362766	0.883303427	1.037458409	1.006047692	0.972363784	0.932483876	0.972667953	1.010608296	0.949669592	0.83055765	0.829094228	0.794287255	0.798941332	0.629022662	0.711989535	0.568620683	0.385670695	0.326639658	0.341817418	0.285593381	0.062705388	0.034379683	-0.076851238	-0.179099485	-0.28055027	-0.301383607	-0.450735802	-0.482083086	-0.648368842	-0.698625095	-0.73453124	-0.849581141	-0.910327575	-0.914348656	-0.969395177	-0.98158912	-1.07369097	-0.938608911	-0.941931353	-0.913383551
0.193795803	0.372332503	0.378633691	0.50220493	0.667424791	0.707866871	0.667389125	0.599709631	0.713660877	0.740829254	0.760654624	0.953118907	0.988836994	0.82449751	1.125165902	0.885120456	1.061808853	1.029673815	1.099615521	0.919528397	0.727529314	0.828896917	0.830477927	0.692877502	0.76086849	0.710406728	0.694016851	0.535261618	0.48665569	0.418552298	0.050192075	0.05316312	-0.152686261	-0.390693133	-0.346145961	-0.50778605	-0.536692284	-0.650264789	-0.69997899	-0.646627549	-0.578312061	-0.69554295	-0.724309491	-0.767437544	-0.894565584	-0.995514441	-0.860227108	-0.922375195	-0.883010742	-0.874559094
0.075056617	0.183081966	0.295251358	0.426822195	0.50837484	0.549131591	0.696245291	0.765482554	0.787670235	0.812053731	0.739759304	0.972139589	0.948546519	0.917537071	0.922802813	0.984317583	0.974238902	1.018623727	0.937766713	0.80645481	0.841400903	0.893644842	0.79127877	0.674113781	0.595994155	0.50968361	0.571651868	0.362800682	0.346764283	0.226142198	0.138179529	0.01922303	-0.108781271	-0.327298184	-0.211060468	-0.354258343	-0.512872716	-0.56049658	-0.625699751	-0.700249673	-0.725943897	-0.759972101	-0.900979773	-0.884792196	-0.907554288	-0.911159721	-1.048698573	-1.031992105	-0.936213786	-1.028841693
0.162998593	0.119446839	0.255646208	0.310263438	0.545366326	0.546667995	0.649745207	0.748304182	0.664621549	0.741001815	0.95568894	0.918892235	0.944638819	0.981285247	1.063928489	1.056970612	1.035519201	1.011006501	0.901147219	0.891115841	0.827212676	0.906980815	0.695460628	0.704562501	0.640086015	0.571319758	0.423288807	0.383474159	0.309765916	0.173233571	0.048142172	0.028213858	-0.108784011	-0.238868971	-0.225484904	-0.177082524	-0.456922957	-0.726812065	-0.558621426	-0.662128354	-0.797909227	-0.859306398	-0.77580429	-0.920402391	-0.898859024	-0.969699018	-0.977831545	-1.041932199	-0.954298828	-0.985553013
0.110802405	0.193774006	0.215388551	0.417398137	0.466437311	0.555257301	0.550012459	0.779398549	0.736574003	0.877162042	0.916908947	1.096979096	0.994366854	0.972932852	0.965436017	0.969411377	0.917611364	1.071828063	0.864576578	1.058209052	0.862870969	0.943143183	0.785714119	0.724447524	0.843061318	0.526127668	0.499878959	0.564087408	0.357319144	0.246041098	-0.037482668	-0.014026426	-0.087347505	-0.173507724	-0.268252876	-0.408790191	-0.439510036	-0.57594842	-0.535409148	-0.802914252	-0.825921945	-0.936698078	-0.839389088	-1.13846876	-1.010012195	-1.01485979	-1.068563119	-0.970265482	-1.034207861	-1.087827627
0.008694797	0.101057775	0.223149795	0.254047743	0.53059147	0.603659849	0.614916267	0.870342964	0.834067556	0.766101421	0.751167742	1.070856594	0.884314541	0.906613449	0.994463329	0.939202387	1.173060596	0.831609808	0.973771832	0.961262199	1.004064413	0.883754442	0.839771819	0.819517375	0.802494286	0.503415298	0.487561874	0.446305974	0.352671891	0.302836464	0.021062087	0.070286846	-0.071973587	-0.236242759	-0.296252619	-0.473688047	-0.425042793	-0.661054786	-0.732821723	-0.824472705	-0.779598803	-1.053491985	-0.878332702	-0.976244004	-1.108397153	-0.967550972	-1.116874543	-1.045468963	-1.167393099	-1.034272194
0.056634618	0.094449914	0.193341506	0.345240487	0.433368947	0.440922569	0.425772857	0.463922511	0.452895935	0.506778818	0.562215046	0.678389476	0.765576998	0.900954508	0.974760889	0.994752897	1.019357075	0.902138148	0.707633055	0.655958787	0.600769272	0.575155557	0.482742042	0.480806966	0.424282377	0.47318842	0.245413289	0.257538038	0.185633248	0.049216978	-0.02648453	-0.002272197	-0.012947803	0.009155581	-0.146288208	-0.197821002	-0.351163899	-0.451558404	-0.494944243	-0.454601983	-0.489729074	-0.42571012	-0.607894906	-0.699076101	-0.819984087	-0.946944363	-0.918793923	-0.952755359	-0.981650615	-0.846130475
-0.037910843	0.021654072	0.260666343	0.29386143	0.422822971	0.298305498	0.47045305	0.414143932	0.433693506	0.528020315	0.723889688	0.716597943	0.881859823	0.913061725	0.945863324	0.945826528	0.952123117	0.905548965	0.783779983	0.764095368	0.673742204	0.634588319	0.611110616	0.480901581	0.414881977	0.484207968	0.363167068	0.226774598	0.126101394	0.058664922	-0.061335026	-0.031678878	-0.045844999	-0.051924576	-0.113324193	-0.236356172	-0.315936469	-0.307091051	-0.368815497	-0.393605837	-0.670433635	-0.654201115	-0.692529166	-0.684711572	-0.835706641	-0.830192609	-1.010787914	-1.051336125	-0.976143061	-0.987226241
0.11519132	0.283084502	0.386683335	0.430310061	0.496345464	0.558527562	0.570133646	0.741347844	0.708668934	0.849751422	0.864885709	0.85690856	0.955380051	1.00143525	0.961381428	0.960276504	1.020693614	0.918702944	0.997521307	0.845573279	0.799638714	0.78661537	0.804437247	0.652402398	0.699100175	0.619988706	0.499462083	0.292557169	0.313940211	0.135912494	0.015630843	-0.006324798	0.003284575	-0.16034323	-0.278551749	-0.283038666	-0.388248735	-0.562424608	-0.654086821	-0.753540573	-0.825285686	-0.848519483	-0.830840974	-0.868278357	-1.014311843	-1.036927161	-0.986334466	-1.077424282	-0.995733203	-0.982219255
0.187623296	0.18178426	0.252284014	0.479816735	0.510449193	0.441211016	0.70519793	0.728676855	0.844347408	0.848312209	0.892595522	0.852537739	0.94660928	0.933030306	0.839774213	1.010922335	1.012698293	1.027195249	0.963875482	0.901684774	0.795521111	0.955387936	0.838198014	0.845038645	0.920283989	0.582952276	0.457580232	0.347953075	0.239869856	0.178743056	-0.047924632	-0.076149937	-0.102402303	-0.208394512	-0.27792416	-0.361160395	-0.427200532	-0.672794894	-0.744415338	-0.828480445	-0.723259036	-0.936944572	-0.858391204	-0.806703218	-1.011360455	-0.881497164	-0.995009952	-1.002554474	-0.945683322	-0.859462324
0.048229682	0.276483394	0.418134379	0.696646713	0.474389137	0.429816225	0.584767518	0.751947971	0.606883588	0.80879555	0.900268018	1.026919304	0.794119501	1.03141336	1.072335813	0.857493951	0.809575062	1.060325896	0.874444906	0.954792569	0.881806938	0.872559062	0.707913615	0.578004629	0.535108175	0.737275162	0.425905054	0.580817679	0.384395363	0.168232659	0.135450085	-0.111353482	-0.1411223	-0.057573823	-0.202399811	-0.352126632	-0.465466198	-0.511519428	-0.741799827	-0.859496892	-0.911120745	-0.740747943	-0.844450811	-0.827684057	-0.928335981	-1.124117627	-1.249211094	-1.14358477	-1.00378675	-0.942945655
0.098660711	0.237374286	0.295884669	0.554395728	0.492883865	0.503202176	0.580026659	0.707545186	0.647623726	0.738516211	0.955035336	0.973382357	0.883464233	1.151657785	0.940076816	1.022260412	1.006256474	1.013560445	1.003571041	1.00541105	0.968471366	0.914919477	0.760826697	0.797541919	0.446572518	0.538024751	0.468200263	0.468220103	0.279926832	0.164944934	0.060395288	0.021970372	-0.081750062	-0.157110681	-0.1390714	-0.267682621	-0.473985676	-0.589541391	-0.693289454	-0.688630615	-0.811255477	-0.850724609	-0.937249133	-0.868447768	-0.927495176	-0.942458277	-1.008665722	-0.92716655	-0.989436299	-0.964700764
17.83989927	-23.82789955	-43.09838452	-59.45638682	-28.29362179	-8.897879946	-121.7309001	-46.46864184	18.49190053	-46.47866033	0.793815052	-47.99514472	-84.59177197	-42.23171536	-74.44843397	57.91210321	19.98038578	-49.36717706	-38.53886357	7.433182995	37.69710978	-25.46039832	-36.62026724	6.87381657	-25.63155779	28.98495184	20.29479859	-39.05140624	24.34834098	57.05757937	-88.62763009	37.23743171	-6.252304528	-20.46136971	-4.235283765	-78.62357026	87.78786639	8.004539053	-37.09240808	-40.78298032	-92.528509	-46.4398613	-7.4825897	57.71407104	71.64071841	-80.60563164	-20.26213367	20.91184306	131.9599949	54.82053563
0.051981457	0.223661742	0.185426827	0.415637198	0.522348347	0.561720842	0.53811819	0.411646784	0.353134362	0.330583299	0.392103822	0.354693639	0.517854927	0.738155034	0.790676531	0.868960376	0.805181882	0.778104637	0.485737372	0.451130817	0.342419254	0.333021598	0.307419438	0.385693036	0.491968401	0.512899603	0.553198227	0.412016508	0.291566748	0.090796768	0.032232789	0.000372366	-0.036122499	-0.154410561	-0.19540652	-0.376461078	-0.536599288	-0.511276947	-0.485856812	-0.370315608	-0.38452893	-0.226814406	-0.315682322	-0.372999847	-0.631116518	-0.669697438	-0.845742117	-0.89030902	-0.828150888	-0.639140646
-3.694840771	-12.31269212	4.728184166	2.678024339	28.44240308	-7.778613145	26.1964859	-25.69952215	-7.685321801	-9.034475867	-16.94570589	-30.25155004	-9.785338404	-6.039134847	0.58150517	-15.00842068	5.850491977	8.625645825	-63.38138263	-30.87767675	38.34524959	-21.35055863	1.609345948	1.314317653	2.102615254	-18.83542068	-14.57483059	15.67610985	23.16021344	-8.089418403	-51.18388329	9.714348108	11.7887699	27.89046311	-52.79130918	-12.22671839	27.72262908	12.26440381	8.196523705	34.79535373	27.74984297	4.55619752	-19.27230717	10.64447528	-27.93825674	-15.01914494	-31.838796	-20.96845173	12.38795718	8.090633181
0.098168204	0.245400294	0.327215581	0.394090018	0.341456339	0.441160849	0.665922331	0.644919644	0.788531996	0.78411437	0.890342275	1.009588137	1.003873974	1.090314426	1.075388485	0.977044512	1.060400494	1.028076573	0.864055764	0.881601983	0.953306668	0.871169031	0.916793965	0.735299803	0.93934284	0.597016145	0.54501759	0.249939976	0.265453831	0.196870839	0.012514319	-0.008278501	-0.121171037	-0.139350549	-0.30446123	-0.265021557	-0.520142433	-0.486944481	-0.54731678	-0.793726094	-0.781046936	-0.83937129	-0.889334207	-1.026599023	-0.993864934	-1.011222351	-1.02562293	-0.935003137	-0.982750066	-1.038972827
0.067158746	0.182846425	0.31708948	0.375238076	0.461421581	0.581796686	0.709653617	0.709287979	0.736953885	0.805883531	0.816021837	0.889568534	0.996523313	0.908311126	1.009053101	0.990374569	0.93771494	1.066790854	0.918576655	0.937576917	0.995963476	0.817727334	0.798865553	0.718653243	0.351022849	0.611151926	0.48986387	0.401368635	0.363568418	0.231609141	0.06973451	0.089249525	0.006082805	-0.195328399	-0.231056513	-0.347413429	-0.520574461	-0.550043775	-0.569739424	-0.758182434	-0.768700832	-0.80433026	-0.84757791	-1.076760664	-0.984224589	-1.073330246	-1.001744564	-0.986982284	-0.992544036	-0.976049873
0.071880503	0.271554617	0.41182	0.653811915	0.69056396	0.612257057	0.482223045	0.477248771	0.59762805	0.833522386	1.096885684	0.954100619	0.95507518	0.842336054	0.947351162	0.870982733	0.895423832	0.854275298	0.908662176	1.005111834	0.975598111	0.82796732	0.653851871	0.471610242	0.531844417	0.548293881	0.708583361	0.648216238	0.558799775	0.23524714	0.127231018	0.087496339	-0.07995456	-0.187665926	-0.456253332	-0.633569795	-0.840202878	-0.647926594	-0.482051701	-0.535237429	-0.632850777	-0.9162555	-0.930675354	-1.025144313	-0.899396311	-0.830892939	-0.910165655	-0.92344945	-0.851014657	-0.923105256
0.224587704	0.497646321	0.545052743	0.72037646	0.642981923	0.577700869	0.620820349	0.600775736	0.802952164	0.826729275	0.866725855	0.862799864	0.858264567	0.82351638	0.776047111	0.839413346	0.924190106	0.92504469	0.938851857	0.99909677	0.907631251	0.793200681	0.557175239	0.586469534	0.60654877	0.499107447	0.59198435	0.62723571	0.588504554	0.590474663	0.349910892	-0.147043067	-0.21861338	-0.427086747	-0.572103329	-0.605250114	-0.615250922	-0.639503871	-0.604456274	-0.695414994	-0.732415653	-0.758547822	-0.7716622	-0.843235734	-1.00720046	-0.879901963	-0.79018258	-0.853248698	-0.858637508	-1.072017218
0.033873941	0.270389255	0.508118465	0.713862544	0.814296701	0.59516279	0.603848145	0.414713571	0.693251837	0.935691554	0.98396522	0.934034966	1.027859232	0.876556682	0.860359908	0.772184293	0.975427989	0.886267978	0.874546862	1.039809428	0.994545131	0.839839533	0.672620653	0.450121336	0.505300051	0.701051804	0.704679413	0.688771097	0.488630579	0.25477728	0.120678702	0.010887682	-0.022219825	-0.289990737	-0.547038752	-0.610265778	-0.678223986	-0.671549981	-0.483897306	-0.419412468	-0.722360519	-0.86802663	-1.041871945	-1.099145128	-0.937072372	-0.798857788	-0.845976432	-0.931603755	-0.813947873	-0.982865556
0.045265662	0.206224335	0.346106271	0.277241446	0.415058763	0.723279702	0.591338988	0.69047177	0.86341688	0.857332115	0.832835978	0.85833811	1.006905012	0.838295239	0.940922418	1.046344344	1.15504129	0.959038492	0.847517496	0.958049578	0.932516123	1.098181386	0.804102547	0.962272848	0.527464103	0.559992971	0.59006504	0.379037629	0.255905302	0.216432542	0.086166779	0.063017783	-0.088230112	-0.25472029	-0.329747146	-0.275756414	-0.495347234	-0.641318507	-0.687424617	-0.780470342	-0.865013289	-1.008525224	-0.875509805	-1.014573123	-0.961922292	-0.926499143	-1.06844889	-0.925675269	-1.028126265	-1.085161295
-0.037553948	0.185652522	0.314297154	0.409000849	0.456232813	0.605067948	0.692383304	0.69356798	0.790230392	0.825705593	0.844281196	0.907737876	1.009266449	0.986374565	0.923718461	1.065151439	0.928354308	0.986518781	0.940071103	0.835650539	0.909307477	0.883818164	0.894147992	0.545564303	0.714798304	0.5077099	0.537246687	0.467283944	0.44289091	0.328798874	0.19453158	0.059985318	-0.054150501	-0.279394843	-0.267758004	-0.421511137	-0.526750127	-0.563343257	-0.651878872	-0.700930625	-0.751928892	-0.726421698	-0.908473416	-0.91295762	-0.964193237	-1.052223488	-1.009449584	-1.023289112	-1.038260197	-1.056151598
0.04017639	0.288953401	0.308017149	0.371210365	0.356361494	0.515193577	0.807256056	0.627350996	0.72187179	0.898567786	0.779176108	0.946228591	1.107814938	1.110104095	1.053399771	1.106217962	1.012021465	1.011365748	1.078487994	1.010040918	0.768470631	0.939130375	0.695417645	0.756684117	0.716129531	0.517495875	0.615293987	0.4546799	0.475994803	0.207175263	0.090312163	-0.023853611	-0.040349365	-0.213941576	-0.383500657	-0.238777609	-0.394752223	-0.608051767	-0.582892288	-0.853844682	-0.717810069	-0.763163557	-1.000575415	-0.893506117	-0.944245641	-1.024123195	-1.020665442	-1.038341681	-1.086498716	-1.112255152
0.181338429	0.186915637	0.289644736	0.38568515	0.404526385	0.652050925	0.616424523	0.679697811	0.544838429	0.861987536	0.997854705	0.992163827	0.897103228	1.059871889	0.74155696	1.043355167	0.985349382	0.791613205	0.902426937	1.065403298	0.992785137	0.840375755	0.792099513	0.951049417	0.599117298	0.563445614	0.401608844	0.387995406	0.177329986	0.274650098	0.001094914	-0.121570133	-0.191841041	-0.270288561	-0.287525146	-0.471756402	-0.593366416	-0.431722404	-0.685685332	-0.877259258	-0.809686397	-0.960538136	-0.906889531	-0.835193642	-1.231090044	-1.080216996	-0.867959334	-1.122458229	-1.224217371	-1.174681613
-0.038287145	0.192046133	0.209833051	0.305862853	0.466763706	0.579269354	0.59559219	0.700094343	0.795508305	0.784438701	0.82256693	0.946295533	0.973191849	0.980089381	0.892100148	0.874142641	1.006537958	0.997906228	1.038670382	0.783206073	0.938786591	0.7737095	0.793459504	0.670660273	0.586896462	0.500029918	0.495413258	0.379390374	0.334021616	0.271186421	0.028320392	0.031783449	-0.074359087	-0.279066696	-0.360440829	-0.461495448	-0.486860258	-0.643581509	-0.637531845	-0.601332926	-0.759043932	-0.8217762	-0.889110314	-0.936261212	-0.959812023	-0.974341069	-1.115269236	-1.006246791	-1.008555136	-0.950231704
0.11680716	0.225859095	0.290729801	0.360140575	0.456273009	0.494059762	0.670965655	0.669013939	0.717677021	0.761251774	0.888016933	0.893802191	0.970448948	0.974387239	1.015072765	0.923929129	0.971796589	0.965174027	1.019907843	0.970740594	0.912120026	0.759657493	0.833347082	0.714743263	0.676392447	0.554101342	0.425988239	0.395015557	0.324877523	0.099923657	0.130701834	-0.019940083	-0.089674323	-0.213016392	-0.205510684	-0.36193022	-0.489418461	-0.543335926	-0.655238081	-0.680266782	-0.703058759	-0.809315628	-0.859243694	-1.041040423	-0.986092854	-1.031054182	-1.176594855	-0.978708029	-1.033168692	-0.947648562
-0.021579395	0.207135986	0.286204626	0.393837692	0.570044024	0.508071849	0.612365154	0.709373937	0.789889348	0.833034877	0.935868674	0.975276946	1.093126932	1.011081232	0.986671205	1.08175818	0.994212487	0.963698229	0.952340403	0.990846479	0.918676859	0.840479424	0.784589103	0.698536061	0.618107549	0.650822522	0.449616488	0.395456786	0.259983716	0.192599107	0.110574005	0.07333821	-0.110385607	-0.22859009	-0.235430416	-0.348267333	-0.468490513	-0.559641345	-0.699877892	-0.755725602	-0.75683	-0.902461443	-0.982314624	-0.843559764	-1.000683709	-1.04960077	-1.025677974	-1.022446906	-1.138622634	-0.850529852
0.058762963	0.256660528	0.494285591	0.709062339	0.724812345	0.64086425	0.49115773	0.453780033	0.704511597	0.912039464	1.069329039	1.114529468	0.953594407	0.986813796	0.86632364	0.940713678	0.951919626	0.922789029	1.031972315	1.053333031	1.04421365	0.868180751	0.581623209	0.508773512	0.588744673	0.640958579	0.721932021	0.685520637	0.483906147	0.260226056	0.063717115	-0.006168515	-0.126276805	-0.224582682	-0.449253911	-0.723509346	-0.918809709	-0.741349415	-0.384907493	-0.489004886	-0.564264317	-0.855110275	-1.019546339	-1.118572899	-0.956353873	-0.942856906	-0.877921842	-0.889086937	-0.953225727	-0.934632205
0.059377869	0.204809787	0.353965458	0.556878885	0.635326105	0.542372599	0.39158328	0.086275769	0.098453357	0.287737057	0.34563232	0.310503998	0.121726724	0.023634103	0.168189607	0.256563399	0.22584613	0.040284423	0.107812178	0.250265171	0.367000206	0.276786738	0.131886398	0.098651221	0.346876109	0.547761621	0.597658745	0.48374399	0.376326725	0.14247009	0.04594265	-0.002197721	-0.037176186	-0.148168406	-0.320938661	-0.529592371	-0.605933166	-0.514958386	-0.383958117	-0.080183546	-0.144904565	-0.287009274	-0.358751199	-0.242393044	-0.160473532	-0.006966605	-0.105864064	-0.257635885	-0.216869622	-0.032245657
0.173313649	0.114404595	0.338271409	0.24728249	0.463882537	0.676155182	0.596664533	0.707376565	0.723867722	0.878318443	0.800306731	1.027099576	0.997582506	1.062014851	1.056660144	0.895644232	1.00519542	0.94150808	0.896710249	0.857243411	0.875478794	0.831062521	0.787175639	0.745057805	0.590696311	0.54078987	0.50530268	0.370935479	0.337464316	0.170392072	0.118069853	0.059004246	-0.211325718	-0.172488676	-0.360543866	-0.420888432	-0.436246621	-0.463598907	-0.72208301	-0.761726193	-0.775100103	-0.842606731	-0.928822795	-0.8719482	-1.012292002	-0.922486445	-1.01955483	-0.877094543	-0.973920171	-1.022497484
0.137982433	0.205943303	0.330817825	0.415855531	0.460201938	0.647633087	0.611886025	0.704456561	0.672069936	0.797448953	0.884376015	0.896228561	0.918361042	0.987834302	0.879721494	0.981253615	0.903250043	0.910414191	0.943320736	0.974024121	0.943962737	0.730909983	0.86949254	0.875539704	1.105409761	0.489811673	0.474372663	0.318427246	0.160249414	0.201517525	0.125199641	-0.054980171	-0.051008897	-0.153750055	-0.337230465	-0.420476975	-0.455345328	-0.45519852	-0.601893164	-0.746913212	-0.804536344	-0.804575633	-0.89795379	-0.913401596	-1.098597102	-1.09090372	-0.972399065	-1.049619605	-1.038705824	-1.007581592
-0.042018081	0.227261053	0.459683341	0.685599019	0.749910509	0.740640946	0.464200778	0.414440149	0.488981029	0.837166781	0.948680333	1.115623502	0.880505344	0.871008175	0.795438624	0.973660522	0.961827048	0.863687623	0.898416258	1.02485706	1.085359478	0.820346483	0.726295757	0.410875647	0.518257385	0.745361736	0.791112588	0.681033985	0.446093688	0.185745716	0.055850337	-0.002646292	-0.088661732	-0.299232639	-0.413897723	-0.703678766	-0.783884025	-0.653878826	-0.570438559	-0.421172053	-0.609705825	-0.954808645	-0.945953046	-0.996714041	-0.904375373	-0.917154234	-0.837938271	-0.827210994	-0.793050384	-0.906521628
-22.11076802	-17.20370374	-28.18016753	-18.84016283	3.306396434	17.94177475	29.35624241	2.856699539	44.74731058	18.82407249	-28.92378866	-35.05792858	39.24816975	-34.99469849	20.35867596	44.23485771	-13.1561566	6.280609067	16.6188297	48.51150791	39.88353136	43.48605982	17.88224246	-13.54625965	-13.7776355	23.69776481	-4.451552684	-38.46026112	-4.108522492	21.35760855	6.339008101	-59.47559554	-20.95773073	-63.59377301	11.09925241	14.00034287	43.50756422	-23.57603055	52.63902853	7.207959115	37.65238399	-32.84503712	-18.09003587	-8.921889598	-57.03218976	-53.99191789	-4.456443923	-9.870654585	32.19822036	35.31624499
0.367649622	0.506024959	0.620803712	0.693436659	0.525638207	0.63238629	0.570168758	0.692374782	0.773278952	0.741149175	0.890934028	0.931018942	0.933969569	1.000954541	0.858087447	0.71221499	0.950043059	0.977085904	0.937668786	0.917416697	0.829297261	0.890185588	0.654913586	0.747963253	0.59548445	0.482002108	0.627658328	0.585947582	0.630989524	0.476635431	0.195402502	-0.044734915	-0.291178447	-0.469753249	-0.558647118	-0.588228742	-0.712058724	-0.56165483	-0.663713605	-0.606414659	-0.714323285	-0.820284789	-0.732211727	-0.923130693	-0.93078528	-0.96762127	-0.983740245	-0.870467405	-0.945379356	-0.906427667
0.112379802	0.230089272	0.313824783	0.279354829	0.536425228	0.563022227	0.505179963	0.888045328	0.694377042	0.937936291	0.966400154	0.899609702	0.949587748	1.253101715	1.137706058	0.823533096	1.043901309	1.131174715	1.150907261	0.880423549	1.128170411	0.670997758	0.835757539	0.60938602	0.970540328	0.672488323	0.408127186	0.357289146	0.381909321	0.189386067	0.130614857	-0.015859629	-0.154482697	-0.313889377	-0.266555943	-0.494615535	-0.550619359	-0.616741444	-0.65026767	-0.627846854	-0.667716708	-0.903143725	-0.991656783	-0.820302135	-1.101906875	-1.013387762	-0.934316129	-1.137848658	-1.148570064	-1.064931669
0.286833809	0.467623765	0.593699909	0.663706527	0.651523795	0.69122297	0.719051063	0.638222605	0.805459052	0.767363398	0.947594853	1.060786817	0.977268438	0.913627859	1.01660428	0.882982893	0.927002836	0.90425649	0.876232617	0.8502693	0.884051023	0.839229066	0.756707584	0.682150891	0.470668426	0.619464449	0.662980119	0.593186843	0.546858644	0.364930328	0.165073359	-0.056798404	-0.261084664	-0.346616916	-0.438667397	-0.616377008	-0.627336899	-0.671487693	-0.553707052	-0.543487729	-0.849302921	-0.761647866	-0.873663708	-0.95023258	-0.967737626	-0.865406355	-0.949562438	-0.877741146	-0.915899869	-1.009889347
-4.337193593	38.01323331	9.890221246	-0.004159439	38.04338805	45.84492149	-20.37792295	8.080252022	2.588520566	28.92710861	-6.215033071	-22.91057619	-6.245883749	17.23360931	-18.48541889	3.218094005	-11.74869243	-28.27621242	-9.017123723	-4.224053214	21.99200448	21.82833555	11.78710863	-25.51269938	-2.956762001	20.82242478	16.77009981	-1.742086342	-22.27500164	-2.019433747	-20.96134857	-6.668890431	13.89192808	-9.37054244	-23.44554183	20.04550498	18.90752457	-10.25834006	-17.15426756	-3.478793172	3.718486978	-21.64831237	-16.50912604	-22.96550777	-5.158433584	-23.65211103	3.27453617	-19.63100582	-3.539019146	-22.59017972
0.073652178	0.204288863	0.281303381	0.413953397	0.505413395	0.477090199	0.597236577	0.81593622	0.830077474	0.838102165	0.883613354	0.838089329	0.998283078	1.071044796	1.085188764	1.00785255	1.008615558	1.044650631	0.90121972	0.924271289	0.875482248	0.798742633	0.63683357	0.662960541	0.624604379	0.61130041	0.436971888	0.336688862	0.227077579	0.166935136	0.076682159	0.044696969	-0.085944015	-0.279983493	-0.170981684	-0.369237891	-0.501250285	-0.646257746	-0.59131418	-0.739931354	-0.605155073	-0.87167056	-0.658296617	-0.997665869	-0.896161917	-1.038175269	-1.063781763	-0.946474153	-1.005596296	-1.013365291
0.067935624	0.257190482	0.258945856	0.271234919	0.31575927	0.632571697	0.539624371	0.657385223	0.70764006	0.883600005	0.843796219	0.988617557	1.113054802	0.986284723	0.915036774	1.095465267	1.161213374	0.986427446	0.985303799	0.929183468	0.781296563	0.888462428	0.776854359	0.733332158	0.711629231	0.537102904	0.690851558	0.520823509	0.435809984	0.152976967	0.004226004	0.041917501	-0.080623002	-0.153609486	-0.336077749	-0.275726234	-0.643856411	-0.575082898	-0.578326025	-0.794061243	-0.893088051	-0.812345178	-0.990625476	-0.870104062	-0.994913521	-1.084925638	-1.084209131	-0.930851757	-1.126891828	-0.818807608
0.147750298	0.248169174	0.353915013	0.376501816	0.476859983	0.466637724	0.690401137	0.649292377	0.680056702	0.72903426	0.937074244	0.840342493	0.812217146	1.012518419	0.990852067	0.949854619	1.072360312	0.85513953	1.043298464	0.876818411	0.818674233	0.767970106	0.700538538	0.648279906	0.428785679	0.555662564	0.477118454	0.317634745	0.366617191	0.19993144	0.103853662	-0.078825697	-0.095726947	-0.258602168	-0.368247982	-0.473137837	-0.455289492	-0.617176156	-0.664953308	-0.675651921	-0.740307057	-0.781149798	-0.863795348	-0.942947784	-1.050528687	-1.000830225	-1.038960095	-1.077556644	-0.966808941	-0.899689363
0.062098796	0.028143049	0.209066495	0.272130105	0.325728571	0.347152538	0.505036043	0.430786083	0.525858096	0.565404919	0.58144965	0.603830619	0.828373647	0.840806503	0.986251554	0.957463074	0.959075499	0.884777803	0.730397282	0.706757741	0.743549269	0.644215563	0.496749296	0.429417512	0.476967562	0.375203481	0.31809646	0.270304114	0.216274974	0.104561224	-0.044263216	-0.011145062	-0.025630897	-0.076647202	-0.17996968	-0.255207523	-0.249813144	-0.390229945	-0.470440594	-0.518809729	-0.505028862	-0.497903767	-0.624584236	-0.686059353	-0.905208124	-0.886517779	-0.975468135	-0.970840498	-0.990476366	-0.9181195
0.023692716	0.162669143	0.162638448	0.193464551	0.423681569	0.421159721	0.403451419	0.528941657	0.597485455	0.652456691	0.651313766	0.831343593	0.802101153	1.070965904	0.941984166	0.980864982	1.015778942	0.873106983	0.790710757	0.783791087	0.656948975	0.548285512	0.545236234	0.51056354	0.454668638	0.292159605	0.291909585	0.217804103	0.056614948	0.153989816	0.102124153	-0.048837575	-0.035568768	-0.092149396	-0.178735196	-0.2480414	-0.343533841	-0.43387503	-0.347078853	-0.456120605	-0.429390935	-0.602675932	-0.688159086	-0.740871299	-0.87659018	-0.987320816	-1.025804281	-0.903957413	-0.995961685	-0.960494859
0.087926241	0.23831532	0.490814316	0.674735125	0.715937771	0.619065058	0.554957106	0.564589979	0.681162412	0.877098689	1.023970493	0.995057276	1.007160693	0.972509135	0.896815428	0.862302144	0.882822894	0.950526199	1.00080006	1.032792675	1.115802624	0.947182948	0.616320712	0.425599997	0.438109817	0.793645654	0.802875415	0.703880162	0.475024452	0.208649296	0.143674971	-0.149560828	-0.227283669	-0.241500641	-0.476300172	-0.641665204	-0.727660378	-0.723796364	-0.578124458	-0.45867277	-0.702530287	-0.903144076	-1.028576978	-1.049279857	-0.942010974	-0.830698993	-0.91614734	-1.020524225	-0.938986403	-0.858494816
0.081334466	0.361582457	0.395883624	0.632508459	0.750708005	0.646449897	0.499800574	0.500587811	0.68798831	0.814383475	1.045398921	1.058616769	0.982246515	0.940874882	0.923462191	0.938485622	0.924254993	0.904156836	0.989864931	1.056976798	0.971224881	0.825259957	0.622728574	0.438492908	0.59763219	0.648901964	0.721537472	0.754074948	0.488958779	0.269240472	0.070104613	-0.083004238	0.02894721	-0.331947451	-0.533823756	-0.661521401	-0.768387966	-0.665646624	-0.49172065	-0.446226943	-0.616921795	-0.775931942	-1.110717157	-0.951139067	-0.961990611	-0.912525346	-0.952071586	-0.901999261	-0.998814572	-0.943692917
0.069100285	0.40285009	0.347485554	0.395136827	0.628887349	0.421637478	0.669031862	0.841824135	0.716978516	0.7623533	0.761647857	0.981004868	0.837227537	1.076393329	1.007377243	1.046235315	0.991482968	1.085615692	1.082803101	1.113981852	0.908847785	0.909568829	0.755602013	0.631055197	0.590900001	0.457238781	0.496094358	0.336005357	0.29605993	0.275588054	-0.108420968	-0.083801053	-0.003210048	-0.230942591	-0.230161654	-0.346202126	-0.573153796	-0.601021526	-0.601596789	-0.735272405	-0.739198467	-0.933090007	-0.950194542	-0.914769502	-0.868155503	-0.989398315	-1.012525898	-0.942690072	-1.122117627	-0.895074976
0.308396569	0.456362483	0.543900711	0.643199514	0.706075635	0.699570798	0.730349122	0.727985877	0.691813269	0.747936021	0.670661182	0.645875909	0.956403763	0.928889989	0.930877781	1.006041894	0.866970132	0.867911221	0.839229164	0.706675888	0.811191803	0.78613782	0.645603842	0.822269433	0.714220533	0.709266827	0.725070315	0.707019758	0.56167495	0.486517171	0.221009594	-0.136054031	-0.23688649	-0.472296888	-0.616032793	-0.516968541	-0.665200039	-0.746481544	-0.559849205	-0.743414251	-0.716439534	-0.614434907	-0.691801324	-0.658750648	-0.829174633	-0.850456531	-0.774919277	-0.83545376	-0.748847308	-0.829482898
0.033437419	0.24389975	0.307039818	0.275322685	0.493969539	0.685775908	0.65812455	0.779808582	0.798373029	0.874333249	0.79819531	0.89989397	0.906523201	0.900664429	0.9669409	1.013993414	1.094122355	0.966623334	1.05915215	0.844264314	0.791897656	0.682325194	0.871925555	0.735974442	0.580320028	0.706125372	0.395176331	0.388390821	0.30567325	0.282070948	0.209674932	-0.066769336	-0.006865982	-0.278236837	-0.278443346	-0.296023002	-0.465895739	-0.508937725	-0.784026214	-0.687897805	-0.779542268	-0.991882469	-0.882992017	-0.982596692	-0.903940831	-1.106887608	-0.957287114	-1.02777875	-0.9776683	-0.800856138
0.174528135	0.469184453	0.430053979	0.63130204	0.532298997	0.648439521	0.650759443	0.716832931	0.709280162	0.746097318	0.709582321	0.839874914	0.886475404	0.848539749	0.798381644	0.89149597	1.03691832	0.919912613	0.895533016	1.034158065	0.989050209	0.822793972	0.682263919	0.741521432	0.647020321	0.645729135	0.664614565	0.500341455	0.49222784	0.358732538	0.386617706	0.072168232	-0.197454221	-0.219520796	-0.467634539	-0.441420612	-0.582792243	-0.499977744	-0.674124169	-0.62828742	-0.687081454	-0.726559638	-0.647289904	-0.574676254	-0.8565618	-0.824955444	-0.855580028	-0.883040831	-1.039112143	-0.895216666
0.125699504	0.258860914	0.210423686	0.252063227	0.4533147	0.481263374	0.724081091	0.886995727	1.017254498	0.944814995	0.92468219	0.789304527	1.142462759	0.839417514	0.970000866	1.079248018	1.20484418	1.088203409	0.995579877	1.008952842	0.927465872	0.864519399	0.93137365	0.594445229	0.568561033	0.609130837	0.444237998	0.379496941	0.373853057	0.273592329	0.112092722	0.047560939	0.04701001	-0.175428743	-0.328120116	-0.480868353	-0.411390214	-0.431874919	-0.690057857	-0.693100622	-1.011686378	-1.052743878	-0.971730571	-0.980150602	-0.982153443	-0.89625075	-1.092666993	-0.962454218	-1.274239564	-1.067512647
0.184764832	0.171028553	0.405664191	0.425246837	0.536489996	0.48642785	0.633317349	0.766184622	0.89893369	0.802571711	0.870720094	0.990417635	0.907582188	0.919588405	0.904517597	1.062291227	0.919182608	0.976530979	0.943665396	0.846521875	0.904329338	0.909799838	0.808131735	0.668151023	0.648009474	0.526122065	0.422611519	0.336146832	0.295837322	0.204023522	0.001758792	0.008836266	0.113436067	-0.102956846	-0.31231073	-0.370182904	-0.458157749	-0.481379361	-0.603753813	-0.844053668	-0.833943105	-0.925683695	-0.866194397	-0.905571061	-0.937684674	-1.052006614	-0.905067148	-0.986641138	-0.955885048	-0.903739705
0.138894688	0.354890805	0.493887807	0.373482067	0.601782351	0.699657549	0.70409407	0.659464644	0.721547094	0.765967743	0.744199054	1.004644423	0.932286974	0.977330988	0.862464837	0.905127248	0.836792098	0.867407413	0.942018237	0.938390743	0.849173758	0.739412185	0.669146835	0.699226119	0.550298245	0.395846078	0.598961773	0.58530726	0.536110127	0.318577953	0.142717307	0.063035116	-0.142622525	-0.302522861	-0.467875312	-0.560282345	-0.601061215	-0.481369614	-0.615158256	-0.58909277	-0.694909674	-0.797465408	-0.880607017	-0.943747813	-0.94353187	-0.856452957	-1.027527229	-1.021189869	-0.979263367	-0.974916717
0.104032666	0.289913307	0.415084951	0.380925203	0.496827402	0.514448261	0.688005096	0.706233176	0.917093983	0.826849732	0.903426209	0.926296052	0.86121501	0.89311509	1.076529535	0.99280868	1.005257158	0.977975034	0.910729592	0.707381236	0.931859113	0.896081224	0.783328945	0.639002438	0.567009285	0.680659486	0.45576064	0.374519617	0.418479683	0.156662764	-0.007032259	-0.140392482	-0.112032893	-0.206526722	-0.308059786	-0.361609218	-0.471272636	-0.717139724	-0.598899432	-0.647823493	-0.68164769	-0.831965125	-0.802556553	-0.895175316	-0.864513461	-0.935137009	-0.814212322	-1.055770491	-0.926699204	-1.063232342
0.156391818	0.189650999	0.270616678	0.406197029	0.394109509	0.646805767	0.620940986	0.594908778	0.799646414	0.804104388	0.800050871	0.934305836	1.019181377	0.999767453	1.026740542	1.066988693	0.911747627	0.967732319	0.931118305	1.093526522	0.904620588	0.802373966	0.838940935	0.718535505	0.737337479	0.601744533	0.566973833	0.349834511	0.375266652	0.144821973	0.161348445	-0.031768285	-0.159209742	-0.196714315	-0.242675865	-0.368552054	-0.498722373	-0.615240432	-0.637815059	-0.808737503	-0.884670345	-0.934815691	-0.952335348	-1.034389946	-0.918684731	-1.041187358	-1.167501134	-1.074360972	-0.956750636	-1.117558867
0.168197473	0.248663293	0.239830484	0.378874197	0.54306543	0.760697137	0.641663001	0.683740156	0.810365919	0.907924972	1.037734676	0.805781559	0.901487618	0.82749694	0.952141259	1.060723889	0.986180967	1.094207029	1.109204856	1.045314843	0.725349984	0.77101282	0.750856686	0.856046391	0.666373642	0.687464378	0.456297699	0.394755345	0.372331468	0.325807686	0.154338051	-0.100456021	-0.0311724	-0.175811219	-0.153374403	-0.455852521	-0.293427313	-0.511463277	-0.631125339	-0.629323072	-0.91823156	-1.072813915	-0.830465399	-0.925138705	-1.141772556	-0.971316269	-1.067881871	-1.069958641	-1.258772059	-1.104957298
-24.79094214	26.44604096	1.771928593	13.63308037	-42.97125346	-27.07252257	-3.551120135	3.21047823	8.472511053	-48.67360102	19.69255497	12.98054533	4.084871999	-14.14614061	-1.262053036	-5.521579583	-11.35696704	31.60746225	-12.12263614	-1.165765786	38.9710722	-33.95566421	2.535183265	-0.887538677	-20.15652122	6.433838334	15.67500471	-8.295160647	15.73349265	-8.422521555	-4.853248796	6.980273242	11.01281321	20.46304743	13.73744251	-3.508380708	-3.541114857	-26.49309714	-6.956243435	-17.32966373	1.268066552	-11.56392882	35.20290826	25.54428051	21.56761372	21.33189936	-14.13968491	-6.505648893	10.35273775	-13.36914184
0.143424935	0.128107494	0.283278404	0.379835928	0.57489294	0.675818458	0.728166378	0.707101216	0.712967961	0.870422811	0.985382128	0.964703506	0.918228987	1.01627324	0.994713465	1.092400173	1.111125568	0.978246542	0.895462333	0.985756214	0.84493903	0.811423926	0.820546151	0.75608574	0.691960302	0.48041171	0.545452849	0.280548562	0.261928041	0.15307308	0.012078483	0.052265509	-0.203380166	-0.174981971	-0.202141509	-0.401735032	-0.462794203	-0.542017247	-0.690427495	-0.836480466	-0.782757645	-0.846528182	-0.88205285	-1.007974136	-1.054116472	-1.130002771	-1.164571564	-0.9877452	-1.128890364	-0.975418952
0.101134089	0.089169911	0.299196055	0.345042897	0.485415227	0.499168355	0.485268504	0.759586108	0.732614545	0.930126207	0.81685494	0.967136758	0.943555217	1.017809494	1.030576586	0.955693165	1.081604599	0.944747021	0.94161062	0.884558468	0.845800006	0.832153894	0.816042518	0.81213567	0.685655678	0.640485243	0.578496409	0.522670068	0.340479537	0.199314506	-0.010795268	-0.005102036	-0.074560516	-0.192129162	-0.203935966	-0.438394159	-0.544672206	-0.713064896	-0.64620562	-0.739028176	-0.966610703	-0.767979634	-0.867380411	-0.877014314	-0.911652448	-1.110946116	-1.030812093	-1.06009384	-1.005715004	-0.990564365
0.055467143	0.235773176	0.503277004	0.687624052	0.809689259	0.688089377	0.507557754	0.443184616	0.651127228	0.813116329	1.016866331	0.926018419	0.883414481	0.859375712	0.892740429	0.886568742	0.889611223	0.858530211	0.925540822	1.016907482	1.010128524	0.906329059	0.648063464	0.439649871	0.429667218	0.724111132	0.798973459	0.669965595	0.388865519	0.317316568	0.027125665	-0.003014813	-0.041076645	-0.252363384	-0.545182704	-0.660823947	-0.767669467	-0.648170449	-0.544656441	-0.43554217	-0.532442131	-0.894577647	-0.995164562	-1.043713977	-0.86653002	-0.878417254	-0.86116694	-0.975038251	-0.871738552	-0.817872746
0.193042974	0.195872607	0.27669144	0.46189889	0.512400723	0.509366512	0.623495912	0.651422393	0.7976855	0.745362037	0.775485895	1.00089342	1.052368888	0.897911764	1.115737828	1.058059006	1.175024558	0.955935099	1.001059485	0.902301118	0.948489647	0.885668724	0.766376271	0.768956433	0.202979999	0.495511115	0.444116403	0.322227181	0.382657842	0.215712194	0.238794543	0.064656714	-0.026514129	-0.206644771	-0.340129046	-0.340555731	-0.543038441	-0.538521772	-0.665495054	-0.679063527	-0.780483207	-0.811292507	-0.865241303	-0.917629074	-0.966722797	-0.93204252	-0.951816843	-0.939410645	-0.938350954	-1.03016918
0.058245122	0.21616887	0.317058423	0.507990532	0.567891468	0.560109297	0.470507166	0.330650475	0.178258061	0.06421642	0.156926613	0.205692698	0.341853435	0.480432255	0.611710851	0.669228606	0.645268685	0.510450906	0.253243616	0.129022992	0.142661108	0.045655164	0.214787589	0.307327913	0.464068038	0.5484143	0.616830798	0.419001115	0.331916983	0.160383685	0.007484148	-0.052164303	0.004067719	-0.241285003	-0.39590809	-0.507436763	-0.570389966	-0.516201745	-0.430353015	-0.316058297	-0.25228127	-0.08104266	-0.137838538	-0.20524547	-0.35366818	-0.41287016	-0.593168239	-0.640749731	-0.628149252	-0.497060968
-0.04550005	0.175472614	0.337616504	0.420605389	0.56087957	0.561545484	0.559869887	0.63016528	0.834367555	0.791249047	0.791243619	0.848926183	0.896896407	0.959656131	1.125227217	0.993929607	1.022561742	0.895618729	0.868380897	0.885349051	0.937595275	0.8663043	0.740719806	0.701993109	0.424913763	0.492225103	0.473030726	0.344275899	0.274867377	0.103350767	0.102247909	0.049073544	-0.190417229	-0.164610573	-0.284725767	-0.372864241	-0.550525529	-0.496068218	-0.61349464	-0.71557481	-0.730918112	-0.780871193	-0.782672392	-0.963355612	-0.946821666	-0.934735041	-0.94844847	-1.05862396	-1.024319671	-0.932471996
0.016059472	0.215737806	0.269911594	0.419415642	0.453616949	0.545369714	0.555662518	0.575898461	0.736508542	0.817665967	0.89973701	0.920071127	1.029468943	0.931391285	0.945928221	1.033811066	0.923617892	1.011316542	0.947682895	0.850027739	0.975568968	1.001906895	0.82113406	0.626362243	0.659017756	0.547135834	0.54663801	0.488829525	0.324505402	0.176158466	0.03918126	-0.006509416	-0.08636641	-0.195673452	-0.259750478	-0.342621192	-0.571640369	-0.555387994	-0.743516745	-0.668525778	-0.76504425	-0.820131443	-1.056039995	-1.027242761	-1.085479974	-1.014275416	-0.94811293	-0.985012674	-1.025549931	-1.004548829
0.119414134	0.060829744	0.328165528	0.513081266	0.508480357	0.514890247	0.743963865	0.628502713	0.699527424	0.745150496	1.002009041	0.830334461	1.071712576	0.851798349	1.009099326	1.018173199	1.076521853	0.919883324	0.983009514	0.954521787	1.000838359	0.900319147	0.82168082	0.654107814	0.775084315	0.547410724	0.566284218	0.326070652	0.305319697	0.353328216	0.02734105	-0.020830437	-0.041099542	-0.264100683	-0.322375933	-0.543704356	-0.579460942	-0.590321136	-0.695679654	-0.843308896	-0.783425086	-0.914007067	-0.95488959	-1.047394324	-1.111252745	-1.016631692	-1.020902239	-1.155345448	-1.07045832	-1.086358639
0.072914131	0.067515204	0.378765722	0.373282554	0.449416564	0.512171339	0.708010127	0.891223151	0.843468408	0.712656339	0.860458172	0.791672229	1.045572423	0.993017672	1.07708583	0.991597092	0.978906743	0.940199088	0.944504653	0.868283853	0.983343081	0.9688422	0.690371285	0.687789989	0.609417143	0.515118263	0.489152622	0.420298716	0.368508008	0.161261652	0.063606534	-0.033248569	-0.204607633	-0.186096846	-0.16482421	-0.427936846	-0.459037199	-0.681122969	-0.870980963	-0.792200081	-0.741952955	-0.979988487	-0.823113155	-1.072605316	-1.017999276	-0.900415612	-1.13174672	-1.05209575	-0.955036365	-0.999010138
-0.926651503	-8.888365821	-5.922213038	-4.690370899	0.806625046	2.810904081	-3.347189305	-1.10610348	-2.742399572	-5.730442289	4.306234396	-0.162048552	11.11244504	3.992299736	1.280394574	-0.235216349	0.766706191	-9.53553361	-2.937412551	-2.687271554	-10.39160512	1.174614831	4.774175405	1.186347331	-1.174182343	-10.19696697	-1.490513173	-5.224416067	6.637926059	3.351689356	9.367550879	7.856110121	7.542716172	3.3160383	-5.729547149	15.69958764	3.854795855	9.448066849	-7.054054778	5.176577753	4.013651153	8.667063624	-0.380415798	-12.87455649	-1.065892825	-10.96999512	8.408650357	-0.820290845	3.039609501	0.165255706
0.097456094	0.38255263	0.385631815	0.550112869	0.758648576	0.751191896	0.666289093	0.777692377	0.79298482	0.751660303	0.787130337	0.991545626	0.88996165	0.938896677	1.145162597	0.982315503	1.100202842	0.972744469	0.981573038	0.885613041	0.753159038	0.829585873	0.672045382	0.695878566	0.76529788	0.552010354	0.577095753	0.648138146	0.466416283	0.306370012	0.233230902	0.031104484	-0.128880706	-0.301427988	-0.37926109	-0.504106898	-0.598604382	-0.718469275	-0.705496826	-0.7156604	-0.648059919	-0.783147997	-0.717186961	-0.866899971	-0.830684102	-0.781575063	-0.85774012	-0.882899912	-0.925663854	-0.927534209
0.18527353	0.265448143	0.205255171	0.291788679	0.52126549	0.743771441	0.680839688	0.623224024	0.86018983	0.866625605	0.691705179	0.949646204	1.047357628	0.860724976	1.03073931	0.935280812	1.010722213	1.035812738	0.873493647	0.898803692	0.833333323	0.835964063	0.704741984	0.645047946	0.645499903	0.488969876	0.396049431	0.426096101	0.367030289	0.157427844	0.159376571	-0.068132786	-0.113081121	-0.199294309	-0.389734155	-0.296543331	-0.394312338	-0.492136167	-0.599319259	-0.855849113	-0.724465097	-0.909878287	-0.853506729	-0.995468762	-1.041727532	-0.906861593	-0.982303618	-0.895824146	-0.92598523	-0.908757427
0.120114046	0.212590501	0.532468958	0.608584246	0.636465796	0.566937533	0.382459566	0.410844915	0.565376787	0.663680669	0.943979659	0.829746053	0.741735269	0.708612983	0.662032563	0.69246194	0.718635872	0.643979032	0.805071233	0.834303395	0.784381327	0.778685797	0.478961948	0.457981052	0.459000929	0.607780175	0.700657076	0.736862517	0.424259352	0.190850241	0.058120943	0.045013029	-0.06789927	-0.303832914	-0.441471137	-0.710037892	-0.663440836	-0.59806058	-0.364168937	-0.320210914	-0.468955017	-0.698155559	-0.888957204	-0.860673703	-0.814957924	-0.793162914	-0.704130934	-0.688250841	-0.703625841	-0.661821983
-0.00811487	0.118388988	0.270597463	0.427145661	0.494974863	0.563645426	0.573383045	0.376541053	0.311667237	0.291889693	0.420675133	0.427244089	0.574648395	0.677215712	0.775567138	0.823176315	0.811254135	0.613469387	0.545361959	0.447790314	0.308375819	0.250172899	0.333076127	0.399975692	0.434068582	0.532425479	0.470472156	0.410817536	0.291331004	0.149886606	0.039840619	-0.001017188	-0.016102995	-0.143456322	-0.267464686	-0.474174461	-0.427422779	-0.53043501	-0.412560756	-0.356321194	-0.29771333	-0.199739703	-0.257417672	-0.469772881	-0.541318705	-0.593004792	-0.779371372	-0.795927045	-0.822902266	-0.696990592
5.649802703	-8.55394307	1.032500345	-0.090814116	-16.38729862	9.508814056	0.726451627	8.216610684	3.567634626	-10.98601153	4.530166611	-9.805488454	-2.785159821	2.554927547	0.599802384	17.33262016	-3.355829645	7.428328538	0.872141492	12.13129113	-7.661542666	16.80479019	14.4167064	7.833255292	-2.722353679	3.74403119	7.865732565	18.71720644	-1.324110253	17.33346821	7.165777045	-7.205930988	-2.141760768	9.993795083	-15.70574927	-11.13765418	-20.74259131	-11.92135316	-10.90469485	3.025915699	0.180656538	-8.644907575	-9.442255435	-9.417458244	13.33327232	-0.979289767	-5.745684961	1.960124345	-12.1865737	-10.33229309
-0.009365245	0.033280407	0.099203651	0.281206806	0.322218775	0.519201488	0.571171344	0.474548031	0.498341687	0.612104946	0.637832861	0.638927228	0.84299268	0.884890708	0.992205199	0.992133512	0.921729497	0.87628623	0.794308845	0.770245973	0.750481132	0.553753863	0.49306882	0.412256741	0.364308755	0.360976178	0.321072111	0.251517911	0.179722854	0.063361597	-0.009481435	0.010397963	0.143779974	-0.06080557	-0.042860904	-0.174706543	-0.289598373	-0.421662159	-0.512429856	-0.518384125	-0.413496507	-0.640650746	-0.620991091	-0.664861303	-0.759682002	-0.918593182	-0.961693571	-1.012367673	-0.974217673	-1.030534888
0.079178955	0.215010526	0.218120066	0.339794614	0.445752763	0.504410712	0.667511767	0.774375158	0.763987958	0.8975635	0.841097984	0.93157994	0.984896132	1.018253913	1.045395163	0.949196979	0.959821287	1.119913439	0.91538587	0.840928565	0.867045886	0.685295875	0.653012591	0.672713054	0.317138715	0.595242891	0.555023568	0.39194766	0.323387057	0.220996316	0.093721701	-0.054886127	-0.164066732	-0.208358176	-0.312750283	-0.285559953	-0.433213475	-0.5109856	-0.673857149	-0.684902217	-0.770273754	-0.857368564	-0.908724236	-0.869984027	-0.938232844	-1.115416711	-0.936043127	-1.081613708	-0.949210914	-0.977293498
0.001351715	0.151731825	0.242446045	0.400734261	0.35500806	0.475216475	0.586430441	0.658162766	0.750927902	0.923256333	0.876083162	0.998001198	0.917229718	0.992368265	1.006380319	0.967681323	0.942941934	0.943983808	0.972696803	0.952568338	0.808135357	0.842689285	0.957446191	0.687035044	0.786370557	0.513369135	0.464482905	0.437913518	0.255140964	0.214220327	0.101244372	0.058964468	-0.126488159	-0.258336251	-0.364388689	-0.43702814	-0.375165586	-0.476354959	-0.717423436	-0.757672363	-0.760896215	-0.775206572	-0.932166719	-1.025768585	-1.030726903	-1.107981507	-1.187450842	-1.044832786	-1.048544677	-1.153940728
0.277204045	0.397937995	0.465399889	0.488146614	0.785230478	0.868217344	0.721285285	0.746040891	0.80544964	0.572157563	0.753490301	0.974094824	0.973811045	0.971848833	0.97389902	0.967632137	1.003346359	1.08337459	0.923479572	0.848937356	0.965081794	0.686651289	0.795721266	0.727533018	0.702523664	0.613004188	0.663590365	0.686285785	0.495391606	0.34280557	0.112535216	0.04208332	-0.182796475	-0.221988102	-0.353637658	-0.506898131	-0.502911776	-0.545291973	-0.774784346	-0.561085087	-0.650693588	-0.656067161	-0.897597622	-0.714887876	-0.786055856	-0.836486618	-0.912076213	-1.045925737	-0.973169096	-0.832643319
0.208720031	0.351226008	0.578501589	0.538580277	0.659762064	0.457869464	0.691053657	0.641761034	0.685905865	0.869161574	0.852575825	0.902827706	0.904739092	0.862884255	0.930787414	0.960739682	0.963537525	0.836984277	0.861259109	0.907242698	0.844339245	0.795560778	0.749877387	0.68623059	0.540243698	0.594369892	0.452541513	0.517786832	0.628323758	0.36052685	0.052630659	-0.007873597	-0.146054853	-0.370803121	-0.471674801	-0.56329942	-0.675296633	-0.527336247	-0.556122804	-0.703352377	-0.771426393	-0.926787042	-0.886513757	-1.041753112	-0.964580069	-0.984046208	-0.92988679	-0.828553006	-0.80552523	-0.889053291
0.349955996	0.433554941	0.631793136	0.632152843	0.631773481	0.755705289	0.561930799	0.721597056	0.741760299	0.741759383	0.809572984	0.943674024	0.956506583	0.928647696	0.959259338	0.803936166	0.89990913	1.029246291	0.959277687	1.003786474	0.893349582	0.802107012	0.602098287	0.604722214	0.546219405	0.581988286	0.711615424	0.62009533	0.66600737	0.428151077	0.232867137	0.027957598	-0.174338036	-0.433220871	-0.596529014	-0.623782027	-0.654418826	-0.473180652	-0.732662134	-0.602783485	-0.712412176	-0.846923296	-0.862289368	-0.869425099	-1.027481757	-0.892891907	-0.808503955	-0.798790658	-0.876615692	-0.972540814
0.071078332	0.102383652	0.261384188	0.254514712	0.562138665	0.412754689	0.651674083	0.790997837	0.731621455	0.81235439	0.883606148	1.009238182	1.038028947	1.017403078	0.972210273	1.069930028	0.92319244	1.162471437	1.098738484	1.028089587	0.901994229	0.800143972	0.809368962	0.668965689	0.633421224	0.641637792	0.388701485	0.379912544	0.438304249	0.352533292	-0.103520568	-0.161034367	-0.151862301	-0.145650605	-0.267083657	-0.398244476	-0.304786608	-0.54728832	-0.694335272	-0.733022747	-0.848560932	-0.842401798	-0.943466817	-0.965270499	-0.966923343	-0.941021975	-1.036764975	-0.969937167	-0.845414346	-0.871926026
0.095187019	0.115970824	0.299136689	0.4482765	0.518800495	0.532667394	0.526325151	0.371428652	0.349264057	0.304041847	0.230392477	0.403819756	0.49943311	0.681594727	0.763227708	0.676964759	0.75042705	0.608795397	0.474745946	0.331604835	0.230994014	0.265179638	0.302322694	0.411896078	0.502716816	0.477113523	0.544507668	0.422224146	0.268738796	0.125612807	0.082751931	-0.007145033	0.014638388	-0.118532379	-0.259945457	-0.496124491	-0.494059336	-0.524369079	-0.468757304	-0.397685092	-0.282379173	-0.27565306	-0.311617546	-0.266842819	-0.443328019	-0.598322431	-0.714462639	-0.770672373	-0.731638094	-0.60963533
0.298411469	0.495218803	0.77625533	0.671477311	0.580383283	0.616811388	0.616178667	0.553099594	0.64850616	0.814349044	0.967322441	0.90017249	0.871030872	0.94311333	0.895558577	0.705897921	1.002062988	0.826636225	0.98125086	0.823971543	0.819181512	0.776290718	0.683052663	0.605217329	0.61135057	0.532067531	0.603039433	0.497820788	0.513419496	0.276617088	0.221253007	0.05828379	-0.372229395	-0.391535517	-0.711730472	-0.630349308	-0.586623736	-0.65461664	-0.466912631	-0.641552683	-0.602677009	-0.778373664	-0.834117539	-0.881592873	-0.926526871	-1.012050918	-0.874750567	-0.743626517	-0.78920972	-0.878381544
0.144806433	0.220214137	0.158155489	0.331530834	0.515234275	0.644396009	0.682210591	0.83484277	0.756957234	0.850630232	1.053870868	0.889847944	1.023569687	0.917840386	1.018080066	0.962687134	0.9665643	0.92343137	0.94379851	0.968668584	0.868535452	0.891692738	0.801513907	0.642245163	0.805225306	0.559706507	0.494290995	0.434780064	0.354771463	0.315151743	0.187383835	-0.013459604	-0.139403292	-0.32427612	-0.206910328	-0.503428319	-0.621779307	-0.596820982	-0.581140337	-0.729230518	-0.771521476	-0.719955198	-0.837060492	-0.906785611	-0.982629396	-1.04171483	-1.000190331	-1.070901259	-1.069260499	-0.903888856
0.112495379	0.358846286	0.406980543	0.308253765	0.50990631	0.57440187	0.574708268	0.645709905	0.676502027	0.912851826	0.874768286	0.98978011	0.953923529	0.839323869	1.109661851	1.021270159	1.054386103	1.042982069	0.835414377	1.03321305	1.130481242	0.955720736	0.892907403	0.768323394	0.473213273	0.596719885	0.494235007	0.437719647	0.294819498	0.30381177	0.197055028	0.01711352	-0.163248372	-0.226001231	-0.350030332	-0.449333723	-0.374129146	-0.541525993	-0.649103177	-0.577164048	-0.795338473	-0.855910121	-0.934636649	-0.878514626	-0.996454967	-1.166173214	-1.081382479	-1.211558883	-1.023364045	-1.080746921
0.17152014	0.283666245	0.509011048	0.650359516	0.668588074	0.773183977	0.787590544	0.73111279	0.738753024	0.722948352	0.87377613	0.741335572	0.906097573	1.060677475	0.937375095	1.068362948	1.033842379	0.962230771	0.910903502	0.978387669	0.827647887	0.801698355	0.877110575	0.824108481	0.783483325	0.653606799	0.690833155	0.660980543	0.584751989	0.34077033	0.214629166	0.052649933	-0.070838317	-0.400581933	-0.575062146	-0.552266087	-0.652126989	-0.664735661	-0.757269767	-0.721482379	-0.605593074	-0.78101582	-0.732393024	-0.702983396	-0.771622488	-0.898527295	-0.901180831	-0.841559625	-0.997240414	-0.773546221
10.64978927	5.45364552	-3.648890051	4.595508313	0.297294211	-11.0981079	-5.983340594	0.50825006	-10.70868991	5.511688029	3.297417867	-7.291111353	5.757506864	-9.082507118	7.661552985	12.68043822	18.19156773	17.30193608	-8.589133582	-19.20297527	1.175831065	-2.823564744	2.683843918	13.72681903	12.74754721	-2.3457495	-4.59133798	13.7019577	-0.014923425	-1.953874136	10.01439037	5.183877317	-3.549847986	-4.715685567	0.625633598	-17.4339873	-9.04558904	10.51870176	3.225547033	-4.755971138	-9.514379574	10.67109186	12.32024947	-5.83562445	9.517090956	-25.00302355	-2.727484569	4.293908087	-4.106345758	-0.991208422
0.220615404	0.238807174	0.252366848	0.368823637	0.474322293	0.487361755	0.716579277	0.822024678	0.74999801	0.899489829	0.831728443	0.960503878	0.913376228	0.937939144	0.973499991	1.051393216	1.058957457	0.91012467	0.983038891	0.898915008	0.797045967	0.868270483	0.745642132	0.709753075	0.661668507	0.48927145	0.490343079	0.439231035	0.219353163	0.162207301	0.181278299	0.041968548	0.040588389	-0.190050901	-0.283812717	-0.373164934	-0.412264887	-0.544340409	-0.678465493	-0.72034785	-0.812888253	-0.804183891	-0.862525541	-0.952001729	-0.970261979	-0.991492786	-0.905243382	-0.877886422	-1.141949932	-0.9689862
0.220372071	0.44851483	0.537323665	0.543189118	0.522257606	0.611224289	0.677170949	0.718485572	0.719720958	0.811023093	0.881751071	0.88434016	0.911686827	0.969415865	0.742429695	0.784761762	0.800598127	0.979286084	1.00195147	0.780489229	0.928744149	0.717031657	0.659624381	0.583470124	0.602432358	0.588467215	0.558514683	0.5640681	0.5230892	0.50397186	0.286866455	0.070836214	-0.407399071	-0.56971409	-0.504760965	-0.592539191	-0.570573481	-0.633179362	-0.572820428	-0.617590054	-0.740140596	-0.741008037	-0.91011963	-0.916344206	-1.01536477	-0.876546474	-0.828379253	-0.895329295	-0.851631645	-0.879901163
0.050007846	0.190991504	0.38661207	0.437226246	0.526456544	0.741503087	0.798326607	0.746175544	0.729634438	0.719092074	0.876547648	0.806379999	0.992725658	0.999786058	0.883646488	0.992394899	1.05383192	1.028451348	1.058653177	0.916617442	0.732797376	0.924451102	0.726495127	0.703842095	0.638007906	0.600431396	0.49015533	0.273823457	0.228421881	0.117804899	0.08956242	0.003923182	-0.011576133	-0.304112961	-0.231006531	-0.350150931	-0.497068068	-0.61549189	-0.786752047	-0.621785524	-0.70006158	-0.724934082	-0.809843884	-1.029587716	-1.018742474	-0.953827435	-1.026351139	-1.019436508	-1.006798565	-0.863004093
0.007015953	0.167803474	0.309374076	0.47238639	0.535491199	0.50060976	0.492617664	0.324319537	0.324259535	0.167191491	0.199484558	0.352108118	0.477961575	0.612641407	0.788741296	0.688745671	0.808746301	0.559272104	0.459595317	0.301475685	0.269136807	0.185519034	0.210563032	0.369932189	0.447424174	0.627542673	0.530024775	0.426327071	0.3134011	0.204826635	0.007699806	0.008889389	-0.022237001	-0.171346637	-0.281353972	-0.398411367	-0.472813275	-0.5489439	-0.461275205	-0.313237937	-0.25556919	-0.225566342	-0.258494395	-0.354410192	-0.455764482	-0.637552754	-0.744107294	-0.684474079	-0.698982855	-0.651954777
0.178932871	0.220716053	0.560145149	0.563391902	0.75542458	0.65844169	0.693150268	0.818922101	0.830989611	0.747037709	0.854983727	1.010959228	0.846632996	0.94935674	1.053432692	0.989214071	0.879240819	0.933287778	0.926473641	0.850385037	0.833197415	0.606520558	0.861762864	0.857255475	0.775354561	0.785995402	0.737486157	0.49850158	0.506714813	0.439159247	0.266923862	0.072348835	-0.224130167	-0.271441625	-0.503865603	-0.582647568	-0.711412998	-0.726303637	-0.634969397	-0.721200006	-0.680373105	-0.625047588	-0.605748864	-0.753152841	-0.798831395	-0.910851373	-1.007944601	-1.022104428	-0.963269198	-0.844340855
0.012134889	0.158395836	0.528356235	0.721168801	0.873750492	0.71323868	0.566425416	0.436252467	0.704096131	0.989551198	1.047008202	1.015398891	1.008132773	1.061505117	0.922737568	0.965084607	0.975995595	0.907750703	1.048633134	1.061240647	1.131498283	0.916880927	0.723679499	0.457010971	0.526107636	0.64362454	0.755438504	0.749199894	0.575026334	0.293655922	0.125120482	0.069778859	-0.025489962	-0.284460337	-0.414024653	-0.729453643	-0.766756128	-0.718064695	-0.574521886	-0.424161461	-0.605744378	-0.880183171	-0.993001784	-1.017986502	-0.948981868	-0.945251892	-0.97258794	-0.892056162	-0.981125755	-0.961124665
0.034454603	0.331507797	0.29855524	0.290595094	0.530669841	0.658771479	0.675091661	0.570098292	0.692202395	0.922782449	0.906422766	0.871099547	1.037822407	1.050245111	1.061129524	0.909989875	1.061240196	1.217497011	0.908615336	0.873413751	0.667579274	0.817515426	0.698306819	0.66408285	0.946771673	0.449823223	0.444013812	0.485059182	0.322162607	0.268550901	0.270546042	0.042646879	0.022924083	-0.146295917	-0.254892058	-0.275496101	-0.376626783	-0.634534977	-0.593048858	-0.777864229	-0.789855566	-0.911448734	-0.974975377	-0.973771465	-0.773212262	-1.127526178	-1.271946081	-1.091445218	-1.087131662	-0.909414864
0.065361396	0.19707898	0.260567892	0.404346362	0.409132069	0.487730836	0.717833588	0.682604028	0.912677561	0.833445058	0.897419236	0.990475267	0.954197024	1.086272185	0.985501726	1.004671261	1.036360525	1.061118839	0.959117792	0.966154633	0.897450085	0.796916354	0.747913417	0.653835843	0.659393286	0.555115632	0.5275099	0.427143448	0.336924616	0.193316322	0.14035286	0.0244349	-0.10076153	-0.196010679	-0.319609351	-0.377764588	-0.4228949	-0.640685764	-0.617189339	-0.653006609	-0.85750391	-0.821005546	-0.807561371	-0.884213869	-1.017519917	-0.911051969	-0.984134091	-1.001984488	-1.06241835	-0.972840183
44.17619932	5.853075577	33.92308072	-42.11165834	-1.82155564	-7.701991582	27.28699864	16.74774447	-13.07452909	-2.082195644	-10.2097266	7.692136293	-34.99011825	6.412213393	-58.40494378	-15.49649725	8.516615842	-23.0940712	17.68730235	-20.3760245	16.35041192	9.181744478	-14.85175239	-30.65878174	26.8440479	9.840425637	-1.210144568	-5.077825246	-11.97811241	-15.91617678	33.81230286	44.47358874	-45.01514184	15.14663664	-20.15302375	11.54445853	-20.74524018	6.422378097	10.98392178	-2.604147712	-44.99886641	35.92004765	-11.9370255	34.54662049	37.98941314	39.95081765	-20.71902798	-17.90259932	7.690213858	-7.993643724
-24.29656949	11.14044596	62.05000166	104.712423	2.143703169	-75.57683321	11.30584513	11.16170307	10.69760465	-52.5932138	-8.215827123	-21.79304274	-66.19127108	-32.94441014	-7.773065177	41.51058979	42.90338641	-36.16766145	5.374522393	23.27100412	-8.822157843	-34.77124277	19.94883499	96.2939114	61.59015274	-36.52666437	-19.63972704	-13.03698154	-25.07591033	19.28457483	-65.43074292	50.72680415	-70.2351157	67.53476428	-12.20615611	-173.2591932	-5.57278726	78.46466174	-24.8074229	33.6090812	77.71238817	11.87463499	-92.36406678	56.96775846	68.64564575	8.842825848	9.117177168	-10.46069874	105.2574112	-60.65274451
-23.96028369	-5.179570401	20.11841264	-15.91739855	-6.934208545	-1.700319696	-19.2173124	8.099825492	-25.44782632	2.766740065	15.05760787	-10.14379328	14.09038235	3.380371729	-12.35168497	-12.84800242	11.21086524	-13.52697527	4.033990802	-12.24608878	-8.047312897	27.19717889	34.44796653	18.7988134	-18.37379292	0.121627449	-35.54986274	22.66402999	-26.71629845	44.40568359	14.91961247	22.21567237	-7.536605448	-4.665624799	10.09818404	-5.6608888	-30.23992293	-18.92995495	-14.33171494	43.13795423	-10.22524924	-18.32643552	-20.59345514	10.3796525	-21.43155943	26.74091322	-13.86811198	5.082737383	-25.99562454	18.82555802
0.14055813	0.110311506	0.16104308	0.512025348	0.492406319	0.701365662	0.74791016	0.731651956	0.875421402	0.829783982	0.923688533	0.957349415	0.911502494	0.993779658	1.0211417	0.963683333	1.039059761	0.883038402	1.037104855	0.883884471	0.914514654	0.883137429	0.82706491	0.708265392	0.770595841	0.692431322	0.466333171	0.462354829	0.142982061	0.222614288	-0.042734333	-0.067016496	-0.167653793	-0.266588968	-0.266529957	-0.483605096	-0.208063679	-0.628480847	-0.586198332	-0.592406435	-0.984420529	-0.894228032	-0.83746202	-0.919953639	-0.873275784	-0.968737985	-0.958184754	-0.976449265	-0.954461736	-0.90172022
0.120976976	0.266154688	0.283414439	0.35852077	0.503492729	0.516828326	0.65158439	0.667759108	0.70606736	0.937632505	0.940593094	0.999417314	0.998864272	1.063370987	1.043560138	1.050793896	1.098353431	1.08771144	1.002688139	0.940146338	0.967510183	0.926751496	0.965621599	0.738915581	0.57957139	0.590813402	0.393798708	0.415791136	0.295184252	0.178370555	0.026281047	0.078693654	-0.20924804	-0.1188099	-0.286293734	-0.44444683	-0.513364709	-0.594382326	-0.657508536	-0.75466575	-0.85320616	-0.868551427	-0.955456443	-1.045845062	-0.951132908	-1.076989907	-1.102267206	-1.139474958	-1.177441193	-1.077764091
0.152566915	0.41404667	0.441324855	0.533989938	0.524681851	0.549914112	0.715972036	0.77357373	0.817493642	0.719657098	0.823453539	0.883771737	0.960828174	0.971955938	0.95728536	0.942139052	1.068687708	0.874538546	0.893951296	0.87211941	0.894878849	0.828044378	0.918354498	0.67446081	0.558054121	0.58550874	0.53189592	0.52057142	0.614390512	0.420674845	0.151980487	0.063997692	-0.287764877	-0.400637856	-0.507564585	-0.549521807	-0.525091572	-0.576887074	-0.656685709	-0.672981232	-0.803328447	-0.853691036	-0.794483706	-0.88498734	-0.998425842	-1.109946284	-0.816570559	-0.8729351	-0.920396005	-0.899602143
0.116232409	0.114852334	0.195510229	0.292302685	0.398880983	0.488702113	0.781578905	0.777908972	0.800494033	0.727413623	0.799912562	0.900522001	1.048475371	0.991378187	0.915640706	0.99541804	0.915233597	1.007573621	0.920323099	0.875178921	0.988925652	0.785831377	0.676748695	0.684987331	0.502570798	0.654783154	0.399670649	0.389999431	0.301215665	0.149810894	0.135366775	-0.078771282	0.059400595	-0.12062859	-0.21816809	-0.414143252	-0.595319646	-0.541368591	-0.688818088	-0.673208084	-0.690341362	-0.780455871	-0.843720549	-0.874715738	-0.887769327	-0.946957597	-1.078432029	-0.839086831	-0.920532701	-0.928141684
0.11988016	0.240590692	0.261586827	0.425658443	0.512124552	0.335201704	0.56706447	0.656558952	0.684004832	0.874195839	0.870966274	0.95202692	0.916842251	0.927795715	1.035518934	1.117584223	1.15416399	0.98191639	1.031124906	1.137522062	0.817048068	0.917017381	0.740681169	0.623322966	0.65186702	0.543822398	0.357486249	0.453208823	0.252429632	0.317979717	0.047026255	0.024726098	-0.121405589	-0.289726741	-0.335477143	-0.292547265	-0.624270211	-0.779919266	-0.581015954	-0.708034878	-0.810850175	-0.781064136	-0.824610233	-1.080431407	-0.884470487	-0.990014803	-1.112674208	-1.15415761	-1.10992374	-1.031072901
0.155310393	0.086810248	0.386835829	0.285576465	0.441588601	0.655708862	0.630867632	0.856061495	0.803191118	0.956117285	0.757607569	0.91923249	0.978348926	0.965071112	1.002626693	0.926775707	0.948730957	0.998873504	1.004795416	0.938937042	0.777036984	0.778707809	0.707062348	0.671878303	0.95936862	0.679052975	0.41665728	0.412034043	0.33116712	0.213059453	0.141628224	-0.064451095	-0.240448947	-0.107286632	-0.322192038	-0.52715549	-0.417378565	-0.603718534	-0.659733916	-0.712381836	-0.727780661	-0.753857353	-0.920313187	-0.985976822	-0.968814578	-0.87284081	-0.877852308	-1.068012274	-0.941788732	-0.875839702
-0.043918005	0.239556216	0.386725162	0.659190961	0.508667307	0.683866349	0.651085339	0.698936116	0.797504702	0.773327078	0.841584637	0.982159902	1.001935291	1.032800196	0.825342771	0.879155224	1.019129571	1.092760507	1.033458065	1.215967245	0.956513927	0.904810728	0.9738057	0.938665757	0.607342825	0.383074935	0.300762269	0.560813649	0.210630378	0.170113224	0.113195735	0.066078463	-0.259919728	-0.405591776	-0.311233273	-0.31202235	-0.530528656	-0.398080411	-0.613112766	-0.751970681	-0.871514571	-0.9023652	-0.823533114	-0.962300886	-1.019964988	-1.038849034	-1.111202018	-1.191814829	-0.934900361	-1.090661869
0.190892913	0.247698159	0.125454588	0.471899466	0.306257319	0.397034908	0.657586824	0.701246614	0.727617027	0.813239559	0.871943848	0.946515583	1.121367674	0.964706787	0.965899052	0.806865258	1.114514632	0.974419399	1.007121446	0.977451634	0.828512189	0.881885651	0.883031272	0.854412462	0.331350493	0.694383191	0.468135229	0.466180935	0.452139868	0.122508631	0.143262209	0.00199549	-0.06890804	-0.199602235	-0.325296527	-0.508828138	-0.415306404	-0.50192603	-0.665192784	-0.764613378	-0.843670666	-0.826450887	-0.976593308	-1.063963042	-0.934474668	-1.069237544	-1.108624912	-1.071843844	-1.025954747	-0.962964294
8.011829392	-21.14120636	0.34753698	-24.16624789	-7.095956089	18.95380871	-1.688695218	8.918535206	-5.072081661	6.006267893	7.089628181	-4.467506352	7.489794994	-9.339793446	5.968641932	-11.34086195	0.164847045	-1.841066567	-9.497458489	-6.042884641	5.244550043	1.218232987	-10.0765099	-3.236041233	-2.31382995	2.448552802	4.38439299	-13.52162957	6.706654083	-4.055823689	-19.54398382	12.31381308	-10.07428818	1.677656917	1.373059441	15.73184793	-6.841428227	6.372943384	-14.58014071	-1.561509227	-12.51015483	-16.70311393	-8.02198817	0.874930767	-15.5378498	9.854383519	24.04296894	-0.006084441	7.211775099	-28.36440628
0.07643636	0.238454633	0.329673032	0.455817638	0.461181947	0.528397917	0.683803725	0.628300256	0.832938206	0.874807852	0.873672895	0.858312716	0.928945915	0.92530919	1.170472173	0.966685988	0.88931702	0.953728349	0.896657243	1.03361825	0.894842585	0.891645866	0.815724195	0.804941796	0.716169381	0.581184137	0.509399604	0.412451219	0.345998262	0.073931537	0.1242103	-0.074273223	0.063277503	-0.272144975	-0.311230586	-0.382663121	-0.406501205	-0.686073446	-0.794313912	-0.729765973	-0.777009877	-0.906751905	-1.00248262	-0.985013905	-0.925128136	-1.025171829	-0.88859729	-1.00745648	-1.037217583	-0.931787504
0.105159279	0.171006117	0.360814203	0.403136689	0.486506245	0.597413297	0.61571956	0.61731596	0.774128187	0.827200683	0.819161689	0.943015626	0.979161576	0.980831208	0.986061195	1.093764042	1.017142878	0.978204751	0.859205793	0.982196295	1.128230756	0.808729167	0.788127968	0.823108084	0.559398447	0.55666428	0.404986704	0.424986936	0.277185419	0.209385397	0.259821334	0.023043633	-0.0530014	-0.255890438	-0.270504583	-0.395895828	-0.464283893	-0.607013275	-0.704840305	-0.768348285	-0.861944729	-0.867328557	-0.942827624	-0.952243379	-0.972281441	-1.108454632	-1.090527421	-1.144394263	-1.081276924	-0.996483706
0.143217844	0.390019989	0.453641379	0.533194703	0.650034631	0.743644197	0.709240409	0.581204494	0.778336468	0.748046364	0.810524453	0.868573573	0.899440183	1.048337508	1.171687257	1.164261103	1.011312285	0.912627684	0.837322577	0.885202196	0.739665153	0.801147528	0.669754378	0.610927133	0.731615855	0.680387053	0.731195048	0.546134477	0.445048626	0.356732423	0.24902911	0.108752496	-0.153869433	-0.210737035	-0.492850271	-0.640433199	-0.5867713	-0.698251996	-0.643147545	-0.561957113	-0.713792691	-0.753413486	-0.757159168	-0.839157095	-0.719260882	-0.942602512	-0.964022792	-0.92113938	-0.822471552	-0.82474561
0.015205254	0.169494598	0.363373794	0.332456541	0.544278627	0.605368524	0.645304924	0.793033113	0.838864736	0.837233587	0.838542748	0.948469494	0.962877877	0.924379843	1.065353335	1.018968672	1.005607195	1.067258732	0.990891353	0.8444819	0.833417781	0.878310479	0.795072622	0.694142191	0.623834741	0.585410967	0.497244897	0.46397718	0.280767007	0.18852925	0.059665953	-0.014215252	-0.09410602	-0.073987028	-0.267797949	-0.35866665	-0.616315989	-0.47325451	-0.688402048	-0.766338154	-0.896039538	-0.993808374	-0.976668548	-1.0062955	-0.994345697	-1.145892987	-1.097779071	-0.95316544	-1.039683024	-1.032652091
0.043827772	0.246129123	0.318921668	0.385516389	0.473389485	0.489715991	0.546038338	0.729430413	0.661849211	0.723784699	0.969147549	0.940732241	0.908656944	1.048002115	1.082428702	0.908607707	1.035725963	1.158586058	0.96713169	0.931085822	0.945852679	0.898609565	0.722040239	0.828561209	0.533224661	0.628649906	0.480115543	0.390544787	0.337061609	0.21910248	0.064180934	0.053598235	-0.174993331	-0.277271535	-0.369914054	-0.43566731	-0.530675658	-0.655503104	-0.762151394	-0.790581327	-0.902898236	-0.883730725	-0.907814899	-1.023327786	-1.043276153	-1.068403723	-1.070049573	-1.086878042	-1.103729117	-1.219451563
0.329507336	0.198670878	0.375527402	0.466929197	0.542934133	0.535880604	0.493910549	0.615867998	0.880280452	0.953448469	0.983857149	0.896378429	0.942427242	1.098781104	1.088077919	1.103447327	1.040332063	0.966335709	0.927745042	1.059244451	1.056907247	0.86710672	0.743088933	0.693674333	0.659305313	0.549907475	0.363665728	0.330733222	0.452267466	0.074178662	0.195407594	0.013747972	0.045562228	-0.097679967	-0.315301056	-0.259147735	-0.412127754	-0.563303491	-0.771367758	-0.760115061	-0.733451202	-0.888965381	-0.860652993	-1.148362622	-1.002002438	-1.18962599	-1.010500412	-1.217882503	-1.059014884	-0.908932379
0.113250066	0.108816593	0.265842098	0.261141646	0.476720924	0.494567173	0.681866392	0.775731161	0.799953026	0.685053418	0.839173108	0.893884975	0.963794233	1.015815479	1.049847049	0.920898047	0.980892442	0.958660095	0.980444537	0.920525604	0.989310861	0.921370886	0.75207485	0.712886664	0.682993522	0.515277742	0.549905721	0.347467085	0.169174705	0.130463529	0.003624195	-0.04899442	-0.124947443	-0.271030536	-0.280567055	-0.400433878	-0.458465685	-0.541710863	-0.539730829	-0.662002868	-0.73457484	-0.903909058	-0.956458762	-0.868113631	-0.994961456	-1.041323687	-1.027273965	-0.899902559	-0.905954563	-0.915277392
0.041564233	0.202776669	0.223231525	0.329354872	0.490845137	0.442905128	0.664731201	0.701011702	0.926482325	0.755567417	0.890077866	0.986517584	0.935767478	1.076539802	0.943835427	0.962774156	1.020603422	0.974062655	0.884940271	0.93046166	0.790145874	0.824518015	0.697959556	0.684685134	0.561179961	0.637426869	0.515011179	0.310427287	0.306548963	0.144984679	0.115011536	0.027501466	-0.1296097	-0.238822039	-0.272965558	-0.387252277	-0.483853346	-0.5133011	-0.653161005	-0.672952739	-0.81385096	-0.861844153	-0.932319854	-0.973953405	-0.933348365	-0.915902091	-1.006330246	-0.943075177	-0.897444977	-1.028011723
0.040324409	0.071792389	0.103146988	0.203812169	0.317765843	0.294112357	0.512331683	0.515506404	0.502086175	0.648236688	0.676756901	0.697212906	0.876543824	0.808209213	0.902135241	0.914940774	0.857999907	1.010383953	0.830023617	0.705099694	0.608102572	0.548224931	0.455776908	0.337053617	0.543622279	0.393356034	0.286331093	0.268038052	0.229053781	0.078353923	-0.004026781	0.059203463	-0.104707416	-0.083039045	-0.08177833	-0.201040984	-0.427077644	-0.510389762	-0.413540092	-0.570050087	-0.443210847	-0.524429226	-0.586474489	-0.744010405	-0.777297789	-0.951194361	-0.975307958	-0.95585502	-1.050271105	-0.852296265
0.055348872	0.192429334	0.271749623	0.426534987	0.552775198	0.53361583	0.690962705	0.73612483	0.729321809	0.794185136	0.894764796	0.92712345	0.853798325	1.038445616	0.922194335	1.047572089	1.011503214	0.839705735	1.024747606	0.882514945	0.963992152	0.816440685	0.760970151	0.644261731	0.852677379	0.575341332	0.470844315	0.366016974	0.263151723	0.188651766	-0.014153814	-0.036618681	-0.069208927	-0.277076737	-0.227772243	-0.397676533	-0.416516391	-0.631163138	-0.612831403	-0.712936771	-0.90982394	-0.856329204	-0.895390392	-0.88723027	-0.957428179	-1.007088871	-0.934416045	-1.055476167	-0.895762218	-0.932399192
0.25856068	0.192049364	0.24121629	0.329431403	0.268274201	0.519188762	0.52833505	0.708801036	0.818770613	0.795602815	0.832814053	0.908286983	0.935245992	0.983255566	0.953620674	0.956350444	0.902949002	1.014141139	0.967056631	0.889103313	0.858447211	0.780617652	0.706277083	0.791640703	0.350275368	0.449557949	0.412345521	0.309530817	0.240887949	0.062321001	0.163908565	0.083841506	-0.052870404	-0.231590263	-0.369309044	-0.366692219	-0.556115912	-0.457658482	-0.677840081	-0.750943751	-0.751388051	-0.830966983	-0.911031233	-1.07635437	-0.974059723	-1.10454907	-1.063356592	-1.041115909	-0.993621277	-0.971670965
0.09358805	0.159934263	0.272460442	0.388491977	0.461963902	0.565563389	0.707245336	0.783991067	0.752528358	0.869706398	0.864808171	1.009469782	0.971905047	1.025383584	1.00497478	1.103184239	1.02415444	1.034350783	0.962964483	0.940422047	0.908874296	0.861320276	0.74787407	0.836559282	0.61192151	0.609480597	0.608925132	0.395626315	0.437157816	0.227284427	0.093758697	-0.071228249	-0.082219344	-0.172819	-0.322957564	-0.513903049	-0.553297781	-0.525213487	-0.71341008	-0.702770709	-0.769009435	-0.977869582	-1.046630078	-0.911349117	-0.947450839	-1.145273661	-1.003272745	-1.070913898	-1.186976883	-1.089367388
0.035813796	0.119436467	0.374465433	0.386264666	0.49563226	0.612105099	0.655376217	0.733329239	0.746367163	0.843750412	0.892136384	0.954145044	0.962838995	1.009050661	1.071416703	0.994617812	0.892363771	0.958502225	1.002515924	1.048805754	0.900848785	0.830600242	0.860580304	0.737380891	0.677571214	0.614200176	0.507039897	0.317550554	0.254673262	0.262927874	0.044529506	-0.103422392	-0.073786283	-0.188876914	-0.218437085	-0.242711099	-0.387343403	-0.54196602	-0.616842004	-0.767348381	-0.627905411	-0.851921786	-0.927456146	-1.062068094	-0.927195074	-1.116280668	-1.064933723	-1.121141518	-0.984586827	-0.935060998
-0.035869796	0.040325956	0.203347466	0.228827009	0.451288065	0.478490776	0.407056525	0.526842026	0.561750563	0.519782003	0.651822059	0.653298572	0.731289952	0.884145344	0.893218728	1.033071546	0.993844335	0.972035715	0.757884274	0.677106961	0.607801819	0.563533947	0.535795451	0.463144805	0.522340662	0.469021291	0.375073261	0.309991909	0.092517614	0.097520884	0.111466494	-0.015767646	-0.020183013	-0.054119712	-0.354386104	-0.214613841	-0.339402485	-0.414237281	-0.460023663	-0.50324871	-0.505509727	-0.485730749	-0.540504762	-0.765385507	-0.675245846	-0.844976827	-0.948772674	-0.973214483	-0.92694672	-0.972891432
-0.013842724	0.09425922	0.168335164	0.237170737	0.249574021	0.360217821	0.491708945	0.522506373	0.530972018	0.640519347	0.660593176	0.666211388	0.878753362	0.732110132	0.964893102	1.104175066	1.021426861	0.892340345	0.851617335	0.588664832	0.660713104	0.520545745	0.474920109	0.431122801	0.447298268	0.358153872	0.328617099	0.225555808	0.140514095	0.097496319	0.039839222	-0.073682877	0.048320604	-0.068180942	-0.091368698	-0.132205764	-0.353034923	-0.511862784	-0.489146574	-0.512568147	-0.503548474	-0.562782397	-0.789061659	-0.763699951	-0.823627913	-0.988629597	-1.004667447	-1.00687692	-0.916682704	-0.882829468
0.008928179	0.208589893	0.379923181	0.382139117	0.381267043	0.573222336	0.657028925	0.584817615	0.727942233	0.884851296	0.924420257	0.81540129	0.906299132	0.987713629	1.005033507	0.901786065	1.005267255	0.875250793	0.995293792	0.867254291	1.002661622	0.983458362	0.734172002	0.667632475	0.289642888	0.528211627	0.473189663	0.332224815	0.212531099	0.213798895	0.107404874	0.031173463	-0.092105166	-0.11938601	-0.154679882	-0.29200662	-0.418873421	-0.678746287	-0.740748186	-0.635175186	-0.917477012	-0.908134054	-0.828206896	-0.870952038	-0.85672161	-1.064654656	-0.936517378	-0.996702241	-1.011209079	-1.048570488
0.090677229	0.069132558	0.468232752	0.388692621	0.297187501	0.671414976	0.638391838	0.764536286	0.840483416	0.807384875	0.850363555	0.94392949	1.048492238	1.135028368	0.901918283	1.027940005	0.983017004	1.00816957	0.886179775	0.832002174	0.943164148	0.721969164	0.723216332	0.690575415	0.49433992	0.448334245	0.385027216	0.475924151	0.400125532	0.177334001	-0.085659303	-0.128556966	-0.056485564	-0.266011515	-0.283772047	-0.346992714	-0.50308704	-0.622622519	-0.550835703	-0.62882321	-0.83770761	-0.818781169	-0.733439722	-0.904054458	-0.965865721	-0.96658622	-1.09042441	-1.013949102	-1.073738681	-1.097460939
0.0304976	0.233863926	0.330611345	0.439414334	0.363478697	0.487288966	0.647383931	0.868007707	0.848621192	1.027117287	0.83242158	1.003491165	1.025132763	0.931350328	0.913813705	0.959998961	0.986988772	0.989106315	0.877728015	1.119746009	0.917649242	0.969861857	0.681962119	0.604652751	0.769974456	0.578094721	0.567191547	0.50685129	0.379291505	0.185691523	0.376148372	0.126056076	-0.147594338	-0.169787593	-0.408728717	-0.458131672	-0.574274835	-0.709893668	-0.600372963	-0.817561209	-0.765870741	-0.822589182	-0.88895632	-1.131675593	-0.986009188	-0.994694725	-1.104772701	-1.181070575	-1.129472736	-1.142340909
0.245275412	0.162211958	0.377329499	0.336701429	0.525019633	0.453689665	0.673516597	0.526010792	0.795957193	0.77978537	0.742539395	0.813609499	0.908390013	1.070205736	0.984153764	1.193634219	1.180019108	1.185115007	0.914936403	1.076018226	0.822659663	0.668351577	0.883919256	0.802142373	0.566587242	0.470219363	0.341395006	0.444729968	0.37972373	0.24152972	0.097042107	0.164441023	-0.182652711	-0.246980552	-0.184389189	-0.474739675	-0.621940672	-0.634469019	-0.828315828	-0.628208995	-0.876033863	-0.964802483	-1.04403724	-0.932079134	-0.950053331	-1.091500026	-1.124950702	-1.197232479	-0.889263357	-0.993203229
0.173556243	0.281194051	0.390581373	0.462671386	0.437557441	0.478967295	0.802971864	0.738642769	0.751240473	0.849952379	0.814180738	0.862978777	1.072514896	0.809128345	0.923800064	0.969178559	1.011561356	1.077305986	0.988397368	0.854345296	0.94401579	0.673431967	0.610671819	0.710153034	0.692058188	0.635726669	0.447133518	0.428207282	0.211455674	0.319130961	0.165193798	0.01700556	-0.025919063	-0.314543727	-0.240670286	-0.458328848	-0.502025471	-0.487250442	-0.676598926	-0.66473674	-0.788161318	-0.810782362	-0.88856135	-0.836271138	-0.965217922	-0.941128387	-1.015611656	-1.002669802	-0.960958373	-1.008329609
0.1928061	0.008004014	0.595788381	0.36613063	0.396612699	0.734788208	0.558852938	0.653409553	0.915786014	0.923560572	0.993095591	0.910404799	1.058135223	0.828078209	1.215454901	0.984578206	1.037813997	1.070538717	1.010438178	0.960833168	0.853049276	0.894546509	0.826979451	0.909785578	0.743915729	0.535439534	0.441337206	0.366068323	0.314334446	0.155217617	0.118909527	-0.072964851	0.109121765	0.011449339	-0.24492288	-0.203850557	-0.601996849	-0.61591582	-0.584464704	-0.804859897	-0.78015289	-1.072005326	-0.907179264	-1.047873861	-1.273881041	-0.980527685	-1.078271997	-1.025420428	-1.160499293	-1.011086774
0.093709107	0.221354293	0.292238842	0.362919395	0.488949133	0.565060292	0.597211625	0.614900797	0.851602783	0.877925043	0.850257515	0.915802239	0.948729379	0.983722973	1.035009399	1.028292871	1.018210658	1.000077214	0.876470142	0.962097034	0.80157634	0.84496147	0.802957025	0.831388589	0.616514383	0.540954174	0.504093555	0.401538629	0.292100617	0.133507109	0.172836586	-0.014454963	-0.057787839	-0.175842245	-0.337139442	-0.449939294	-0.420625479	-0.547906412	-0.575466744	-0.765309873	-0.829953808	-0.806635964	-0.921935542	-0.869999314	-0.928664429	-1.019049728	-0.920196502	-1.024964605	-1.004007684	-1.014090057
0.029406227	0.280180485	0.237243493	0.360245493	0.560252047	0.462455649	0.589983691	0.551064127	0.860818553	0.836678566	0.809275274	0.965444746	0.893668635	0.940389989	0.939143575	0.961304093	0.944061818	1.026835996	0.8398756	1.012205541	0.827814779	0.83412915	0.828361437	0.654257419	1.181533187	0.563856901	0.402431768	0.312319559	0.174342363	0.260187815	0.030923956	0.01743241	-0.133658655	-0.016147203	-0.379897626	-0.376688499	-0.51695967	-0.498298394	-0.672001987	-0.654780598	-0.783527492	-0.827132313	-0.875906512	-0.917630113	-0.992306435	-1.168364559	-1.037064901	-1.015814362	-0.868476714	-1.123463943
14.06087492	-21.86882813	-28.4966707	-27.77038037	-24.07598706	-42.78420431	-11.08392213	-10.09096475	16.74211532	-10.77018035	7.894794461	17.11363981	83.26520846	-85.73617089	58.27109986	56.37518732	-21.36369393	-15.1466001	-10.62436828	-35.94548117	25.09078282	41.03544934	37.9368568	-1.616080291	12.34733599	-2.27880544	-9.386687441	9.781801027	-16.73761978	41.03055925	-36.72733412	-57.46225464	7.449537991	102.9350576	22.80173565	39.08224933	31.2804008	-14.92170583	46.30916719	-42.61512513	-20.64255792	18.51542238	-12.17545332	-89.57825088	-42.21059742	-17.81706219	10.65978935	-38.28231753	-4.561090466	20.20433974
15.41487448	-4.008288657	9.641542151	-23.20862938	-1.094078656	3.117247319	5.123036296	12.57883909	-5.501365079	-18.15144111	13.83930517	4.712179378	11.44405287	-1.711934342	13.16573436	-3.798788344	30.33620865	25.75220978	-3.264840441	19.53937368	5.197122077	14.5931617	-39.1192086	7.166092565	12.23693492	-1.78361311	7.389913957	3.158108754	5.365768159	3.522377633	-12.72594697	-17.15740108	-36.46347651	9.24495215	0.253877572	-5.300094218	1.069687106	13.01299132	-9.676473444	-11.9876574	-29.31517587	-12.15317975	-20.44516396	12.53445746	-22.43721066	23.98901267	-0.320410606	-51.40240745	10.45051051	-17.42115597
0.017372487	0.179541673	0.270809752	0.491728955	0.479196752	0.503750938	0.631950888	0.677602893	0.713477262	0.845400529	0.920323037	0.913997451	0.975491406	1.050020281	0.967659755	0.990180245	1.000033728	0.993833812	0.964892416	0.95072546	0.865433866	0.839466044	0.746001517	0.614415157	0.773110702	0.561993134	0.431724516	0.275115359	0.363747564	0.202973892	0.148246515	-0.044774181	-0.15776805	-0.128673783	-0.286483959	-0.392875533	-0.445026219	-0.700600564	-0.606186526	-0.686631805	-0.797798457	-0.804595274	-0.889289334	-0.883288829	-0.921178586	-0.946499022	-0.949209533	-0.954885888	-1.067881954	-0.970003777
0.046461995	0.197980411	0.328961882	0.566846498	0.479479367	0.626923409	0.458606851	0.290830196	0.187958852	0.171752722	0.158852917	0.121047028	0.338372354	0.480255801	0.550144923	0.558495978	0.65579627	0.501837055	0.314633121	0.15091029	0.084055523	0.097136418	0.193156352	0.382836692	0.508607411	0.521001638	0.628678554	0.51726642	0.282635609	0.08013361	0.009988377	0.050300468	-0.057298428	-0.135405198	-0.393862754	-0.471450934	-0.492584118	-0.624797389	-0.519856583	-0.327626806	-0.132106476	-0.164286878	-0.081815049	-0.109277066	-0.345823126	-0.521137367	-0.581865084	-0.702291264	-0.664978109	-0.444604068
0.169459211	0.346387374	0.514628065	0.757579991	0.641149017	0.727494721	0.677771567	0.61088488	0.816044149	0.682257233	0.712566628	0.808998667	0.870655071	1.069686843	1.029846312	1.04069132	1.124320311	1.064066067	1.002600783	0.846284884	0.802225675	0.759691176	0.728378294	0.721452083	0.801532258	0.65486434	0.566882385	0.573061328	0.649012724	0.4142524	0.200581014	-0.009644642	-0.305847275	-0.332911766	-0.573299299	-0.563625895	-0.684175285	-0.623302936	-0.666483004	-0.595732905	-0.660058756	-0.591020081	-0.702404042	-0.704342397	-0.884140606	-0.890209557	-0.875653919	-0.957894457	-0.990240242	-0.853224762
0.051590307	0.320509587	0.468072992	0.448446838	0.501265153	0.629106839	0.497136221	0.660881105	0.768786731	0.774149189	0.803670543	1.050649112	0.99213746	1.020082174	0.977096518	0.935140013	0.961849818	0.910011815	0.894843709	0.974481341	0.939091544	0.854726977	0.972902343	0.573655996	0.940476643	0.423543026	0.602279886	0.441323364	0.241613522	0.071957107	0.08745213	-0.031937535	-0.063321754	-0.063132138	-0.078334646	-0.384042313	-0.316023127	-0.470814531	-0.584142813	-0.734252828	-0.569156946	-0.827006335	-1.004251853	-0.936122622	-0.878414295	-0.852814799	-0.910135202	-1.047155187	-1.094559227	-1.129243505
0.054481805	0.279326328	0.433313908	0.532037809	0.597923532	0.498661596	0.483135612	0.170115082	0.092243427	0.119104648	0.291564938	0.141623073	0.069447588	0.239104592	0.329984623	0.342008103	0.327790975	0.086266878	0.028373728	0.169204534	0.334252763	0.200574014	0.027966517	0.21372322	0.3916783	0.472724494	0.619214443	0.520788795	0.357610866	0.164711264	-0.003883461	0.02571823	-0.009056248	-0.181474815	-0.392180508	-0.497847759	-0.56430466	-0.565050225	-0.397235814	-0.25299472	0.048931171	-0.275386419	-0.342279962	-0.19054922	-0.017426189	-0.185061213	-0.294214124	-0.344937035	-0.27774529	-0.212895899
-3.554500639	0.731960272	7.520117629	1.071119893	1.796241363	-0.328192423	-0.576487203	-8.908814162	-4.064714998	-4.83071982	-1.521232019	-2.175323974	-2.761077821	4.148348798	2.514300342	-1.735263793	0.463018587	3.99406136	0.385411286	0.237806107	3.449796964	4.00873495	2.445112681	2.30393475	3.912088281	0.674803992	4.257612211	-2.979227575	-4.662765317	-3.62796186	6.16499088	4.003954919	1.542874854	2.685680195	0.028515129	-1.143432179	6.053827922	4.139587943	-5.928677691	0.664516374	4.949319022	-0.555470981	3.647412344	7.809579375	2.310873768	-3.527706982	-1.817283977	-6.926287108	3.883418696	-2.325671422
0.120001075	0.187097211	0.215006688	0.442909317	0.455991881	0.604102781	0.630923003	0.741394456	0.7381496	0.738750393	0.882664434	0.883750508	0.962424382	0.980879145	1.058533218	1.033860048	1.010389314	0.945253991	0.96628307	0.966749183	0.890356024	0.93595462	0.792994779	0.752309275	0.629899755	0.522529111	0.444395946	0.408076768	0.310957329	0.170141904	0.072346074	-0.037859655	-0.135998453	-0.259156846	-0.268801878	-0.306311491	-0.443291512	-0.495046269	-0.571816531	-0.755828994	-0.785509859	-0.773146826	-0.977457998	-0.878641204	-0.894588428	-0.972138713	-1.057013067	-0.972746959	-0.957836158	-0.95289589
0.123689456	0.191168176	0.369967493	0.373145147	0.526891161	0.470757366	0.676089571	0.609779478	0.822647204	0.746147694	0.859373916	0.905678017	0.893807393	1.047608583	1.028918038	1.007110336	0.940535998	1.036725777	1.021950755	0.902591371	0.923626425	0.895380422	0.755930031	0.680592263	0.697023753	0.515831298	0.494736817	0.4250463	0.281855448	0.190755173	0.084735002	0.011454865	-0.03583862	-0.149012157	-0.2714188	-0.375507128	-0.479952949	-0.448990114	-0.703972307	-0.712002443	-0.82307033	-0.878045253	-0.869325237	-0.95723065	-0.957960097	-0.944966913	-0.860272589	-0.982590626	-0.933318056	-1.017745258
0.186263619	0.096473562	0.19958198	0.42373674	0.490679099	0.651127046	0.658053468	0.868979739	0.7904354	0.833062699	0.865321553	0.955005405	0.975151627	1.045859684	1.066716235	0.892985927	0.909471344	0.978081183	1.040456635	0.903108426	0.933212759	0.729910023	0.679964881	0.692184478	0.55688395	0.741327767	0.459352461	0.281096711	0.356051317	0.191838822	0.017418462	0.047653517	0.003458086	-0.149394702	-0.242841561	-0.334374839	-0.346511686	-0.578585332	-0.573042572	-0.745884379	-0.828394616	-0.990467264	-0.933777367	-0.923153831	-1.035274546	-0.971258721	-1.013479384	-1.088938907	-1.017455314	-1.091183429
0.108804196	0.509709127	0.633332189	0.754370754	0.538421343	0.577100757	0.484339254	0.656955638	0.686930126	0.814045713	0.874213522	0.860517782	0.877796679	0.981249176	0.830955625	1.036872613	0.865103754	1.070514131	0.877987478	0.920122497	0.794028743	0.788895553	0.709283001	0.593754396	0.625048859	0.676300167	0.481523448	0.682630484	0.604130864	0.461724194	0.194988106	-0.046711508	-0.326178264	-0.430869944	-0.668663236	-0.556190267	-0.665031299	-0.576576809	-0.532556479	-0.594378086	-0.756356285	-0.753670897	-0.794044393	-0.820726819	-0.855135434	-0.883970945	-0.952343257	-0.962387649	-0.987081622	-0.958181428
3.65018111	-23.88014811	27.08743484	22.5996345	-2.624811483	-10.68459087	131.0216117	62.92580585	-69.2048034	-35.53862084	-21.92381497	48.38868255	-1.239677781	14.56870196	-11.20088903	-3.684775351	50.62404126	-6.153488601	-6.645556506	-31.82454842	13.40435724	53.21059338	-19.088764	4.917598987	-0.958459992	63.77714637	-11.55201901	-49.80602563	0.094604138	21.70831368	-72.65592006	-63.42419184	7.974323305	-4.114839458	-61.89639597	-38.97718652	27.75632188	-12.64531604	3.130099497	15.42146067	39.51217642	102.5400703	-35.21117115	-11.84438464	-31.1415959	26.64658205	54.85408352	32.55377652	-76.40366671	-14.91844161
0.174522174	0.188424662	0.321742771	0.305215067	0.450599362	0.438847691	0.67222553	0.739381835	0.746169057	0.92050416	0.954383517	0.889373823	0.957542775	1.052009937	0.945106351	0.958300845	0.993669141	0.977559655	0.969793265	1.052318561	0.952379817	0.8696438	0.724311357	0.727955657	0.314022454	0.659475294	0.585208392	0.411808206	0.268973373	0.246832028	0.041859022	-0.095745177	-0.048345414	-0.286278838	-0.274465804	-0.34588418	-0.461107616	-0.467840003	-0.556802848	-0.585139076	-0.864346991	-0.787335141	-0.844209276	-0.886897224	-0.974543444	-0.940787106	-0.958081992	-1.027035056	-0.904814016	-1.02534007
0.167449635	0.124701407	0.238522588	0.332612	0.61777121	0.572778407	0.668489241	0.715073924	0.802484626	0.8255529	0.779338245	0.914021659	0.935568494	0.952108161	0.92124812	0.968665853	0.954593343	0.998645353	0.967084401	0.938657224	0.858791064	0.943316887	0.685764922	0.717648124	0.566506973	0.574450729	0.602712319	0.38145338	0.345912849	0.214101243	0.102114306	0.010896648	-0.097005945	-0.180998128	-0.30514241	-0.396649547	-0.51674516	-0.672909908	-0.564506047	-0.63895073	-0.83824342	-0.902731572	-0.943677477	-0.817308293	-0.930655956	-0.891997802	-0.934980361	-0.962247219	-0.948304348	-0.966904111
-0.100456617	0.169528547	0.343516534	0.43718183	0.419077898	0.608418532	0.526915199	0.68439499	0.736778426	0.873442347	1.036795578	0.853722494	0.970683615	1.071490232	0.97686937	0.98322856	0.93543303	1.082688074	0.95058679	0.911241796	0.838675923	0.928489559	0.949107349	0.761917376	0.590293005	0.493951367	0.5322518	0.254348235	0.302417354	0.176810825	0.157222578	0.102204996	0.037182558	-0.141504997	-0.149649145	-0.335489944	-0.58453927	-0.609739798	-0.705370091	-0.579880051	-0.760759573	-1.011334486	-0.999528748	-1.064861426	-1.046813932	-0.979094265	-1.051198806	-0.913744272	-0.880451246	-0.822721233
0.039427042	0.131889528	0.318367507	0.337161187	0.441235338	0.493600122	0.598535651	0.708944238	0.852145399	0.735240302	0.917700157	0.951762709	0.989680065	0.967947409	0.918086245	1.067817499	1.007776724	0.971570048	0.932420936	0.998394542	0.866261239	0.810187446	0.792347561	0.683296301	0.653716566	0.665641474	0.384766457	0.369397404	0.333281517	0.23197942	0.110323523	0.076751198	-0.062012981	-0.213127684	-0.291152798	-0.446437964	-0.516902124	-0.520856885	-0.689859645	-0.722118409	-0.747842005	-0.810439645	-0.832102576	-0.833703059	-0.87389197	-1.028731091	-0.9167998	-0.991483105	-1.001110709	-0.95941483
0.309520707	0.343120294	0.494547222	0.531543163	0.611462224	0.667907059	0.753117737	0.690602528	0.734846376	0.763883323	0.768958377	0.815864391	0.844634764	0.921247498	1.003152547	1.029868834	1.147060242	0.928130359	1.013296245	0.831523846	0.728725438	0.820691094	0.653885632	0.796942222	0.75504218	0.566726979	0.591419202	0.524795181	0.476202789	0.281428328	0.187983506	-0.035399074	-0.183787187	-0.33941663	-0.373083784	-0.504771258	-0.516445434	-0.601026887	-0.629283719	-0.523309657	-0.665602255	-0.713136045	-0.824575392	-0.890450725	-0.791061604	-0.891589408	-0.897006975	-0.865411594	-0.942335651	-0.750594424
0.042009002	0.040634633	0.319499849	0.323099483	0.46299264	0.460916772	0.461723965	0.410779945	0.349329675	0.445224969	0.399289835	0.360549039	0.586901995	0.736553334	0.823540724	1.010947729	0.817215703	0.799266376	0.602058913	0.50295474	0.413154722	0.331059436	0.332418665	0.371178335	0.495562736	0.539829236	0.387477725	0.384438161	0.255025463	0.093428737	0.063284289	-0.051002637	-0.003817085	-0.187308439	-0.367860339	-0.341752588	-0.464065998	-0.517454671	-0.414333378	-0.439059104	-0.278463616	-0.292180386	-0.384696555	-0.379530643	-0.603266561	-0.713325597	-0.8569037	-0.835352939	-0.781482914	-0.781275127
0.071264971	0.220472593	0.355033762	0.436651203	0.445622425	0.585527549	0.64495513	0.705230117	0.82075033	0.840262961	0.931262116	0.96149913	1.011239995	0.933130539	1.04657543	1.05991209	1.051549538	0.955662456	0.926532052	1.037055754	0.804391834	0.846055416	0.674436616	0.764527754	0.607033729	0.560351262	0.430292654	0.457567158	0.284074971	0.118627232	0.131833364	0.028454761	-0.061399488	-0.148831037	-0.272695996	-0.345375715	-0.529650016	-0.584484655	-0.732404657	-0.624966353	-0.808395085	-0.801639876	-0.853214658	-0.869445233	-0.890949626	-0.961191897	-1.062393319	-1.048826675	-1.049309992	-1.014571717
0.078794176	-0.054416989	0.388206004	0.366972171	0.276489911	0.61089979	0.657280864	0.737433741	0.504537449	0.646073136	0.953647849	0.920563441	0.799585035	1.029694355	1.155451901	1.061810845	1.121556797	0.855962491	1.033668888	1.123028425	0.874481762	0.929679234	0.798341503	0.678058386	0.70994549	0.480567347	0.385008468	0.447986882	0.189734249	0.055257347	0.206555318	-0.093245683	-0.182605562	-0.282903735	-0.327061599	-0.248439119	-0.50978662	-0.599275881	-0.438771663	-0.920788731	-0.80014605	-0.929259352	-1.146431565	-1.240367449	-0.963175412	-1.192087988	-1.009242289	-1.029449273	-1.121268973	-1.044073593
0.078438414	0.156700999	0.139765569	0.285369523	0.419534784	0.473276803	0.6320474	0.650164436	0.854899311	0.665759314	0.937662611	0.932195052	0.918038505	0.88584172	1.059482264	0.940060063	1.032811679	1.057452035	0.839917699	0.92716163	0.822735301	0.74153068	0.668369509	0.66590613	0.694250305	0.581151015	0.457300641	0.458168534	0.376184567	0.214651741	0.197710194	0.047509868	-0.164833602	-0.111650133	-0.188008652	-0.409267048	-0.484424506	-0.558730354	-0.735014466	-0.655979324	-0.647130301	-0.768237628	-0.832270289	-0.979461185	-0.882395791	-0.933208558	-0.958640274	-0.994127973	-1.039540358	-1.063347016
0.197185778	0.216921414	0.337020294	0.46897329	0.47835565	0.717364537	0.477873858	0.669988295	0.775479288	0.818014996	0.906011465	0.747983312	0.726901772	1.035523695	0.877282422	0.912915308	1.030267005	1.056339044	0.918702765	0.855027179	0.883248864	0.95713577	0.649628982	0.579657699	0.739385271	0.570157323	0.496775857	0.334333116	0.33241226	0.096864566	0.060324188	-0.046105212	-0.046884606	-0.228325364	-0.451907331	-0.521639333	-0.374031585	-0.539702941	-0.678163485	-0.666313506	-0.78983606	-0.85806398	-0.798534017	-0.941532559	-0.87169033	-0.969188987	-1.066702141	-0.950663053	-1.060245928	-0.957611015
0.059528799	0.090433005	0.26772108	0.386491282	0.408315627	0.411496659	0.447362141	0.429646429	0.486458922	0.298162438	0.416305228	0.538607523	0.684489181	0.830557642	0.796381111	0.919978525	0.793842619	0.83790658	0.717477915	0.47074004	0.341243653	0.388176332	0.395967596	0.417361352	0.423157513	0.490186918	0.392728641	0.363196683	0.292390907	0.148126298	0.02826755	-0.060483622	-0.05149615	-0.122989563	-0.290794569	-0.370372516	-0.478388593	-0.370701695	-0.496083604	-0.432786068	-0.437270222	-0.419947691	-0.3576336	-0.464763223	-0.641327137	-0.788480002	-0.812500099	-0.87900389	-0.779459199	-0.820898535
0.108141714	0.18384941	0.260327536	0.431901461	0.49757583	0.493211644	0.642249132	0.711595202	0.838796345	0.870923232	0.994348521	0.940850846	0.946204347	0.906339482	0.96444504	1.023162318	0.948845741	0.912349998	0.97994856	0.795813253	0.830895716	0.839585539	0.805320553	0.596091767	0.669789516	0.583501861	0.54660197	0.450867101	0.302795166	0.284353606	0.050756524	0.201266911	-0.022817366	-0.218693208	-0.211890792	-0.458374683	-0.586341503	-0.460582755	-0.631041863	-0.669167855	-0.742062933	-0.827672265	-0.840821014	-0.991371131	-0.980108857	-1.023778605	-1.000765705	-0.932650299	-1.047663557	-0.908341856
0.298537492	0.0911672	0.198845288	0.511794173	0.549280575	0.476487979	0.655537742	0.632395363	0.742771357	0.854554223	0.966388969	0.896567441	0.814597443	0.876238423	1.030356485	1.002059741	1.019287201	0.966582813	1.032132547	0.93342293	0.938383464	0.78239973	0.706059421	0.602142849	0.644681095	0.605916584	0.671959986	0.281159091	0.26525382	0.195845489	0.186727136	0.237885654	-0.230552419	-0.140350152	-0.441693589	-0.378065919	-0.579862096	-0.495783615	-0.820868566	-0.542604183	-0.706484905	-0.876719344	-0.714603136	-0.909029256	-0.917813362	-0.804460113	-1.143367995	-1.135419833	-1.144550114	-0.864579985
0.128829843	0.25208211	0.515219765	0.600115781	0.832076979	0.703408901	0.506135753	0.339014572	0.631038704	0.695584267	0.937516645	0.976008005	0.878845071	0.863583099	0.837658071	0.784227975	0.828982605	0.721095934	0.953800635	0.949592745	0.953092665	0.852823454	0.632923313	0.405191819	0.444826345	0.669307406	0.797047369	0.659375243	0.493439435	0.270706423	0.022554402	-0.064326529	-0.095290177	-0.317969442	-0.474322856	-0.689958168	-0.803136715	-0.70034829	-0.39809091	-0.466170063	-0.577086442	-0.733298881	-0.974078429	-0.925160958	-0.96397213	-0.816393156	-0.789252015	-0.946365695	-0.805555296	-0.775550514
0.007127611	0.170272454	0.278930776	0.338075626	0.469033051	0.62094942	0.643277437	0.736786044	0.745501199	0.827378197	0.882261024	0.965400917	1.003938778	1.068022361	1.050647163	1.044243556	1.071964336	1.02472242	0.899266886	0.893800042	0.872343956	0.828833995	0.828173969	0.851385767	0.718396752	0.573462646	0.465634203	0.503364947	0.303259284	0.152772106	0.058549562	-0.027815745	-0.035710933	-0.271288807	-0.26145236	-0.356075688	-0.496020985	-0.647750816	-0.65570954	-0.815545637	-0.836187826	-0.894274478	-0.857007712	-0.973568568	-1.074364122	-1.072983755	-1.088360883	-1.051441377	-1.076841422	-1.065457066
0.108036668	0.072944038	0.324708548	0.280233829	0.538158162	0.602130575	0.717140098	0.724713489	0.827913213	0.89908199	0.931330577	1.025306426	0.910804194	0.92151852	0.929971711	1.0668182	1.135692271	1.15599822	0.884016682	1.006893847	0.995201793	0.914058752	0.673473738	0.758984456	0.628662688	0.529825097	0.40888729	0.409110275	0.29631882	0.146136901	0.099432892	-0.057226561	-0.134174017	-0.200226436	-0.271098471	-0.23338101	-0.600051871	-0.663773231	-0.669375686	-0.707380305	-0.90827076	-0.900456042	-1.000537939	-0.950568993	-0.873150573	-1.012557376	-1.10935623	-1.050719791	-1.120162295	-1.082166108
-41.26702994	25.97443894	37.71948928	13.15401219	-34.59780081	-12.18352463	4.074008071	10.16268711	7.914681253	32.19162205	-14.040001	-15.68355493	-12.65102485	-4.453071181	-2.509999895	-30.97860345	2.115055319	4.877469915	14.90045231	14.43209008	-10.47291245	-5.907484816	-5.735991075	19.94117739	5.045095878	12.76475072	-13.7811768	-9.814786723	-4.107529637	27.18818719	4.962205485	-28.76726252	8.999176535	-5.158312553	-13.72187255	26.6567783	-5.961774744	-7.869254692	0.710689798	-4.72680855	-13.78239453	4.481619762	8.339676003	15.08535446	10.51357787	11.67242686	8.834946402	6.769200904	7.157720646	7.900531251
-0.030600864	0.185739356	0.383245377	0.54744115	0.531466625	0.589357828	0.364792928	0.195806675	0.015384505	0.151465923	0.117441288	0.096515232	0.016318814	0.253589839	0.367372697	0.414380199	0.358392765	0.277102698	0.040334285	0.076285118	0.084825838	0.121428996	0.02347468	0.201331836	0.385925734	0.573518635	0.671397422	0.572022847	0.389735706	0.246827389	0.01803464	-0.003316069	-0.056448407	-0.184159616	-0.388267023	-0.578141727	-0.652298552	-0.596460423	-0.403943066	-0.245424126	-0.036929101	-0.131752762	-0.115905391	-0.050895009	-0.009897103	-0.192336057	-0.316423713	-0.445469976	-0.37616317	-0.260502448
0.125521095	0.216143823	0.365076752	0.337037523	0.482592654	0.526549036	0.549058766	0.66389401	0.793706262	0.869453558	0.842610249	0.913341686	0.900435199	0.943591974	1.012319534	0.896117769	1.080443599	1.017738716	0.99571145	0.904733841	0.896308528	0.835329642	0.87015029	0.790294268	0.835802199	0.56366123	0.420161656	0.364494479	0.289671059	0.188243182	0.039913361	0.019364897	-0.12675334	-0.164139981	-0.43045216	-0.369093529	-0.518766904	-0.633417949	-0.730070097	-0.712829661	-0.860396215	-0.883602923	-0.876780315	-1.013779866	-1.015900959	-1.024037595	-1.00965214	-0.924723362	-1.014266099	-0.909119378
0.163341126	0.219621939	0.220426491	0.467743939	0.415741312	0.421326194	0.580264179	0.841268513	0.639581211	0.883034873	0.861449696	1.02225	1.078173234	0.852060205	1.055379371	0.93282188	1.054889876	1.153165348	0.983554439	0.837201686	0.957417262	0.766103403	0.844518762	0.715143423	0.694247432	0.567588803	0.492078235	0.401565248	0.227232386	0.146297537	0.229439099	0.005934969	-0.058580511	-0.174616264	-0.279387182	-0.463450596	-0.457661643	-0.596673814	-0.659491664	-0.874558392	-0.81602271	-0.795178775	-0.902193502	-0.945225233	-0.95758144	-0.974965816	-1.107540396	-1.075698209	-1.077479841	-0.996958811
0.079706531	0.161123671	0.231313226	0.427643764	0.518326727	0.539594663	0.708437499	0.687057671	0.826510208	0.864663293	0.968673412	0.876644646	0.893917977	0.940182822	0.907693961	0.968049387	1.061511474	1.016763219	1.076702322	0.857208033	0.892660848	0.793565687	0.771297928	0.603235853	0.672385518	0.49027522	0.531396506	0.385956282	0.296848615	0.235219202	0.103715652	-0.015150992	-0.090675509	-0.203829292	-0.329313059	-0.435662047	-0.414579709	-0.562293351	-0.707762626	-0.728188312	-0.761014768	-0.843899699	-0.891460809	-0.878462019	-0.930181493	-0.892556203	-0.94048632	-1.027931579	-1.026257362	-0.949578396
0.260704196	0.518799784	0.564566236	0.638313671	0.56651563	0.573105779	0.521534661	0.569485504	0.759261622	0.601850842	0.800465743	0.829356794	0.864374803	0.908637456	0.909183483	0.906275532	0.787212446	0.963045993	0.91686181	0.976909218	0.94984877	0.712334012	0.742662535	0.629737529	0.569111045	0.751426695	0.635120783	0.726101099	0.632430383	0.381966652	0.23030112	-0.019521229	-0.237092898	-0.361470224	-0.625622476	-0.70294004	-0.626918017	-0.501787638	-0.531085385	-0.619641561	-0.790300469	-0.798423611	-0.902370601	-0.84437738	-1.078435979	-0.86357833	-0.876961054	-0.894417883	-0.857668635	-0.91652533
0.152481511	0.434722822	0.592163737	0.60178742	0.72499067	0.750012351	0.664776573	0.663564785	0.685915746	0.772367258	0.80993027	0.90445641	0.979040898	1.06908496	1.024505851	1.014594573	0.943795131	0.990535406	0.976317381	0.779573592	0.849266719	0.78136204	0.698284901	0.708489773	0.677399167	0.723318781	0.721186295	0.584299734	0.447952806	0.496636009	0.179990592	0.018371121	-0.151198908	-0.267685992	-0.455502062	-0.642395767	-0.8181238	-0.704949294	-0.745685063	-0.635295418	-0.665374482	-0.649955887	-0.745358089	-0.756515771	-0.839582086	-0.865028838	-0.871497885	-0.90549106	-0.870421943	-0.849151939
-0.036811979	0.283716079	0.315136365	0.618492456	0.659240859	0.591691316	0.439540758	0.354653325	0.427427841	0.789070721	0.774969491	0.741453119	0.783465438	0.577444927	0.678380487	0.576517774	0.543818271	0.766237516	0.662381685	0.716630161	0.80434011	0.763876524	0.45727253	0.311377088	0.294302986	0.640268182	0.606010605	0.607514163	0.34504227	0.210741712	0.149441305	-0.010639076	-0.143688343	-0.246448733	-0.486633311	-0.525040996	-0.665684294	-0.528917604	-0.411700184	-0.252456122	-0.413716629	-0.620242031	-0.846187817	-0.787816676	-0.602766354	-0.711675056	-0.58637976	-0.652809168	-0.578263855	-0.604390767
0.04636422	0.128938146	0.339475291	0.381380067	0.484148314	0.461665203	0.695195597	0.82556634	0.880867479	0.770725803	0.873283254	1.019260522	0.851606401	0.897200566	0.933974037	1.109123273	0.999037311	1.008098082	0.940658573	0.863153248	0.959742329	0.876928372	0.774883409	0.703282147	0.671130601	0.662506101	0.471928324	0.22104659	0.388261432	0.271452041	0.28026187	-0.031561816	-0.182032289	-0.106503284	-0.292536827	-0.497707339	-0.447393195	-0.551006046	-0.661473863	-0.658340273	-0.829691375	-0.876268828	-0.846654885	-0.909773364	-1.026033888	-1.177733557	-0.901879067	-1.061458523	-1.091710107	-0.95037845
0.086461781	0.217158353	0.207461811	0.240024929	0.478573818	0.474564853	0.546364361	0.413061891	0.32827538	0.33155789	0.320186637	0.424441118	0.603825634	0.656748977	0.767792613	0.839119517	0.823392395	0.766572932	0.544285049	0.449314511	0.323925854	0.403024776	0.487493136	0.527230845	0.477772726	0.502093782	0.540540345	0.402706941	0.265910389	0.149660097	0.112634361	-0.04524784	-0.062220858	-0.117602461	-0.377060542	-0.357877778	-0.509320143	-0.564661325	-0.466698922	-0.491880268	-0.385204915	-0.334093202	-0.447516782	-0.502063189	-0.531535731	-0.732103542	-0.849139649	-0.957372331	-0.814281372	-0.80935073
0.208062324	0.1249386	0.187917138	0.4039598	0.516986892	0.530165927	0.653632578	0.652154495	0.724247814	0.800863373	0.860856316	0.8976785	0.905419496	0.959851968	0.882386189	0.877209146	0.919995277	0.941677098	0.973355793	0.824337561	0.907181243	0.712882676	0.901945567	0.817074705	0.439863687	0.533026057	0.353039115	0.309987806	0.307157161	0.239237932	0.100240507	-0.045478969	-0.03763564	-0.150130023	-0.244583783	-0.389269932	-0.457824481	-0.509758712	-0.515544678	-0.644982965	-0.826142922	-0.924371909	-1.029153045	-0.902084312	-0.978418006	-0.874537215	-1.030278647	-0.989314023	-1.046967	-0.854607766
0.200555279	0.5114697	0.552658728	0.627508071	0.840302916	0.760600472	0.682630203	0.660107785	0.528701474	0.716627521	0.638342597	0.806418992	0.912765703	0.980512882	1.089421458	1.007803264	0.967124394	0.943342217	0.84935749	0.852756436	0.75127881	0.661624606	0.601118103	0.707059378	0.563062522	0.838128306	0.871281606	0.728110913	0.568846133	0.403699318	0.244956931	-0.007117312	-0.180166098	-0.392425324	-0.523544227	-0.69590661	-0.833217295	-0.574996949	-0.576746715	-0.614495978	-0.539166853	-0.591967581	-0.640917592	-0.682821634	-0.765051486	-0.817319629	-0.788893982	-0.860768653	-1.057111376	-0.83271573
-0.056275591	0.098724688	0.351644073	0.433692688	0.464800877	0.557646012	0.54430485	0.681798477	0.778738361	0.842833962	0.964732143	0.929731804	1.039694678	0.956161479	0.950833733	1.096339922	1.025683081	0.98100821	0.949050676	0.919484368	0.90287755	0.814247037	0.806732333	0.634279904	0.762254033	0.576881475	0.541176225	0.364863761	0.265495272	0.097499723	0.184841367	-0.033412503	-0.042944506	-0.236802527	-0.208788925	-0.608746215	-0.576708064	-0.508729933	-0.728017667	-0.708268634	-0.763342691	-0.784528335	-1.037174934	-0.892780351	-0.756998015	-0.998155532	-0.996814171	-0.988199515	-0.990451985	-0.897300863
0.132763301	0.198637245	0.243854473	0.335704949	0.527458365	0.565517176	0.69089811	0.682975184	0.726039557	0.835875453	0.821172626	0.968323909	0.953385681	0.98721084	1.062016347	0.931458523	0.927849495	1.031917759	1.005245352	0.91945721	0.941173634	0.833402461	0.807028125	0.70421481	0.55959509	0.538051078	0.421035563	0.390752233	0.258865732	0.28548889	0.0678843	0.008006669	-0.185102628	-0.246150944	-0.281842372	-0.439803133	-0.561521477	-0.624510411	-0.726028061	-0.830412539	-0.874508071	-0.976100282	-0.945492837	-0.989761093	-1.158594499	-1.131094679	-1.110906801	-1.100187391	-1.077058896	-0.973873406
0.182859154	0.096361917	0.224917514	0.358534757	0.61455934	0.596078959	0.578288192	0.707341906	0.789982575	0.872600152	1.0253333	0.98050651	0.929747012	0.998220923	0.983307919	0.820716397	0.846773724	0.930828129	0.917280996	0.927797637	1.021286052	0.808731034	0.597034306	0.629839744	0.763422697	0.677905627	0.623308122	0.29469947	0.117432251	0.14488897	0.177345103	0.065199463	-0.093540004	-0.222818457	-0.209118234	-0.374303148	-0.579568298	-0.615735922	-0.577202486	-0.889522231	-0.687117429	-0.729284337	-0.899515356	-1.023560237	-0.959402669	-0.910626444	-0.982324886	-1.004212455	-0.984971608	-1.028002824
0.135459753	0.260781417	0.221113096	0.366971805	0.592551393	0.533685956	0.633715904	0.7646998	0.855308426	0.78878041	0.886128951	0.908178146	1.078896684	0.950072829	0.883559452	0.979092599	1.089058515	0.945698366	0.870631411	0.994153602	1.001169011	0.645756405	0.735163152	0.592935059	1.014866716	0.55648658	0.603772567	0.302755722	0.267158828	0.177973141	0.084240794	0.005032557	-0.069832698	-0.193980599	-0.27731965	-0.344233313	-0.428086321	-0.569122761	-0.669989776	-0.827296615	-0.822793161	-0.876850934	-0.902123034	-0.972667774	-0.921349163	-0.987607705	-0.983499467	-1.089417494	-1.041735843	-1.030257636
0.126381284	0.252938577	0.616182743	0.625939468	0.67555605	0.537282223	0.705066741	0.715984752	0.507895497	0.844259131	0.741845939	0.857412175	0.911163409	0.910712482	1.025609658	1.071343086	1.069571033	1.059133261	0.921433389	0.946642795	0.846445356	0.826310876	0.749317724	0.611518129	0.755260419	0.688326604	0.572490914	0.6344915	0.471325898	0.304747685	0.255872222	-0.088313372	-0.151860589	-0.410696458	-0.455060515	-0.593175964	-0.632029956	-0.587465883	-0.675199353	-0.690280083	-0.714633725	-0.640988201	-0.522741069	-0.674423563	-0.747841325	-0.97216541	-0.796383828	-0.933946625	-0.914402494	-0.883460777
0.049955025	0.196645682	0.508821646	0.629755171	0.538331558	0.52498085	0.465824011	0.205669968	0.497001919	0.544729441	0.885057926	0.958137446	0.71331365	0.842800145	0.499964603	0.655957803	0.656587082	0.590442269	0.674632133	0.726643041	0.884856103	0.663522153	0.533279947	0.324825544	0.20347209	0.709276055	0.617733487	0.740046469	0.522699368	0.230498206	0.145131108	0.022111218	-0.150916037	-0.143371263	-0.598713502	-0.577479156	-0.738982587	-0.389531481	-0.428890185	-0.173678761	-0.544175985	-0.635663375	-0.877405066	-0.7165827	-0.846078278	-0.7413435	-0.583692934	-0.860506911	-0.650855779	-0.534895276
0.063116859	0.157049414	0.345464767	0.501325938	0.560872399	0.486790421	0.449062379	0.306901824	0.089382302	0.088779279	0.026685811	-0.110467441	0.066270275	0.27916504	0.474737907	0.521916602	0.390170308	0.303720386	0.07776781	-0.01394426	0.093129125	0.08012419	-0.017144458	0.30130617	0.335753131	0.599194195	0.547757537	0.530924231	0.379046497	0.212377677	0.066454214	-0.014053429	-0.090422555	-0.23570765	-0.290220456	-0.46887222	-0.509265078	-0.607829252	-0.493841734	-0.300266242	-0.063346195	-0.103881921	-0.05038277	-0.006627468	-0.104684664	-0.316519893	-0.37228957	-0.5036251	-0.468663565	-0.252593497
0.027986893	0.299386256	0.557601627	0.552788955	0.775766966	0.739568294	0.722099594	0.761130611	0.628551193	0.762325752	0.768688171	0.767104017	0.890485792	0.964521768	1.065556203	0.900001582	1.070441606	0.968330667	0.935028234	0.858133099	0.733771665	0.708168116	0.710434431	0.63348556	0.689841607	0.608160525	0.786672535	0.581735828	0.46312167	0.180022456	0.191760643	0.003674194	-0.106288398	-0.3230633	-0.493026474	-0.627566656	-0.659265491	-0.587069107	-0.673754898	-0.635365953	-0.717891425	-0.725660133	-0.596822121	-0.814912002	-0.873970519	-0.77855947	-0.840323351	-1.000234155	-0.938689533	-0.848758545
0.107864923	0.174996393	0.295185278	0.358000287	0.415351416	0.560306838	0.491091433	0.760506221	0.696823162	0.80648796	0.815772217	0.90424731	0.966841145	1.20972954	0.856766941	0.990058532	1.103333568	0.837120629	0.927696854	0.973124566	0.866792757	0.801411413	0.873605513	0.687914862	0.990313595	0.688893524	0.534656849	0.422952929	0.39828731	0.136302809	0.131593906	0.023199822	-0.147863633	-0.215010102	-0.265486349	-0.320784103	-0.574670927	-0.654793148	-0.711049199	-0.727601363	-0.766773291	-0.920300772	-0.867272245	-1.019906159	-0.931301239	-0.984853344	-1.001741013	-1.103220245	-0.91113679	-1.024163994
42.02965462	-12.99262842	-21.1804912	47.94651408	24.13789619	49.33997071	-4.538970037	10.10184912	-97.36117114	-2.87564233	42.60839375	-41.66512924	-61.38161597	67.75069842	-52.8870809	55.96108508	6.283991472	-8.246088208	-76.88437292	-82.3492417	9.846820146	13.25699954	-72.15909637	29.28326391	-58.57977278	-63.81497061	-9.56758189	14.40399886	-33.13675377	46.80632897	-10.0305637	78.08906347	98.59512125	-35.23803733	76.86740437	-69.04860431	-1.950259116	-68.18060314	-65.9004548	-2.75832419	-47.77099544	-41.0457969	-32.70566728	-100.8879782	-35.14126695	14.2392714	53.56279203	3.321107893	57.55634541	27.81231432
0.168287844	0.320209971	0.38823527	0.509265258	0.389527875	0.60164345	0.635510384	0.67689497	0.709590442	0.788537227	0.868011551	0.977792091	0.895720556	0.957436982	0.84520279	0.880208609	0.968662508	0.963847549	0.941733438	0.900663696	0.868283854	0.837111617	0.707118039	0.60885539	0.653266184	0.5847377	0.453063793	0.397468461	0.405805143	0.307549819	0.240496863	-0.069789829	-0.131728913	-0.287366678	-0.422947979	-0.544252788	-0.4626586	-0.644024628	-0.604645143	-0.764588056	-0.647390084	-0.841873598	-0.828944747	-0.851349386	-0.99839067	-1.02811803	-0.952369585	-0.90790131	-0.916860419	-0.798459715
0.097622846	0.122121022	0.216196358	0.379623315	0.326504999	0.627562617	0.614987033	0.717725595	0.833601557	0.777815208	0.900233687	0.961157509	0.98498249	1.152071858	0.877134096	0.918013811	1.129289373	1.064529997	1.048664248	0.87767665	0.848801614	0.680105793	0.7164898	0.622206576	0.740167075	0.590703724	0.317783695	0.513432509	0.359637821	0.10970697	-0.12102687	0.079548161	-0.180416195	-0.11102616	-0.393753339	-0.31126022	-0.419042295	-0.506602126	-0.702768939	-0.612610197	-0.755254298	-1.004950688	-0.829017175	-0.792414664	-1.053987419	-0.970815363	-1.101829431	-0.995964851	-1.069103151	-1.14985046
0.07837336	0.218922184	0.400361998	0.400028595	0.481150693	0.577550538	0.639088556	0.767959324	0.733406321	0.778232809	0.973516452	0.968216258	0.984853357	0.972925326	0.950951939	1.000773682	0.979201829	1.012238066	1.025975683	0.960827681	0.827968519	0.792632298	0.746879097	0.654186076	0.616266031	0.627464151	0.502469738	0.384940387	0.311769507	0.100176935	0.139384355	-0.021351498	-0.104657845	-0.204309995	-0.310741966	-0.351812905	-0.454204752	-0.502659519	-0.64633023	-0.749225316	-0.746171419	-0.83389791	-0.880010545	-0.916942487	-0.945391484	-0.893624538	-0.941789006	-1.077706474	-0.945866391	-0.980875998
0.15167313	0.237960794	0.305970291	0.351953131	0.58207022	0.582797906	0.543769059	0.709390204	0.739265727	0.809514916	0.818330422	0.894706585	1.038048919	0.925701717	0.941699439	1.021223766	0.944990872	0.949216345	0.88650344	0.962557749	0.904635593	0.898205966	0.765716635	0.683621933	0.607652712	0.595814941	0.443798194	0.305160604	0.27409367	0.130577749	0.122143962	0.054198577	-0.024278291	-0.206001906	-0.274885787	-0.378860929	-0.529483034	-0.471421803	-0.647802831	-0.648962139	-0.770748205	-0.840819472	-0.879540914	-0.910598833	-1.033289855	-0.978908738	-1.065738318	-1.02565446	-0.920180623	-0.978147588
0.298811536	0.219540347	0.400386284	0.309851422	0.513542698	0.545085283	0.645904522	0.65317947	0.688612471	0.806821098	0.831303056	0.941059685	0.805232457	0.968534317	0.939806839	0.925289355	1.09129456	0.978852049	0.948636347	0.901989607	0.840393823	0.797074551	0.802913611	0.762382975	0.643101862	0.573787929	0.400190882	0.387669056	0.286456662	0.184237834	0.128827621	-0.037361037	-0.06131037	-0.231492881	-0.373600869	-0.20725947	-0.516108128	-0.61330688	-0.608701042	-0.789020698	-0.807304202	-0.730020856	-0.901007836	-0.984478971	-0.965949388	-0.930531161	-0.963296664	-0.991785643	-1.009105619	-0.882599825
0.033458759	0.164254443	0.324698078	0.503887617	0.606434052	0.527257848	0.43501943	0.283617002	0.160010235	0.025651208	0.006111306	0.063329279	0.237211081	0.377723259	0.583717603	0.571030586	0.549032731	0.376030559	0.237386969	0.103371008	0.003076668	0.009968678	0.057231023	0.271512556	0.444642053	0.599849524	0.570281091	0.491615327	0.305714521	0.148581374	0.057779102	-0.031958502	-0.021583593	-0.188807929	-0.409034809	-0.426732538	-0.614600848	-0.530070754	-0.464087419	-0.303663059	-0.126377417	0.018496557	-0.021860652	-0.083824941	-0.256981092	-0.346561534	-0.56421655	-0.616128581	-0.5681605	-0.441980316
0.237412937	0.478174117	0.228394757	0.299396203	0.389830547	0.644665581	0.74859328	0.658915354	0.729699573	0.815550379	0.83987773	0.905920081	1.067528052	0.911728428	1.132417575	0.965660351	0.975966661	1.156842806	0.921638349	0.832594428	0.745010726	0.866040854	0.865285106	0.80803558	0.645407123	0.629922063	0.604864287	0.367835615	0.316391834	0.187026878	0.222485877	-0.142870861	-0.033644422	-0.28506132	-0.334752506	-0.430167534	-0.43687495	-0.462086988	-0.707879591	-0.801975056	-0.961358637	-0.922797831	-1.016640023	-0.960071262	-0.957646621	-0.993571506	-1.145681376	-1.024755073	-1.092088948	-0.97819044
0.205985261	0.296921299	0.253392004	0.580198366	0.448140156	0.57893699	0.568578854	0.703935392	0.740197224	0.907447807	0.81023148	0.865538314	0.953326058	0.956716148	1.095774223	0.974567774	0.885775725	0.921302498	0.935175428	0.980280592	0.884427755	0.873833054	0.609563691	0.614619144	0.685099075	0.473686469	0.43408302	0.323363608	0.473974325	0.265655243	0.012461299	-0.039938419	-0.157829717	-0.281418214	-0.232467652	-0.421197726	-0.456041174	-0.588966991	-0.625373769	-0.731515387	-0.643857346	-0.867835962	-0.883963952	-0.989240103	-0.895407466	-0.89914264	-0.91226229	-0.959644405	-0.906114449	-0.956847223
0.159325718	0.150845768	0.214643379	0.352515162	0.461109722	0.6329022	0.640042684	0.633358365	0.800642589	0.919519585	0.707290732	0.916639828	0.976553944	1.020256805	1.045762035	0.961449324	1.107682312	0.876916046	1.050282854	1.019682456	0.800453849	0.898683796	0.584349511	0.633146874	0.740481507	0.578558486	0.456248803	0.336911458	0.240875316	0.2779809	0.034103855	-0.066160302	-0.070649171	-0.189877104	-0.366960033	-0.374744765	-0.442526734	-0.63704461	-0.512046297	-0.743189419	-0.759949512	-0.763697884	-0.978838045	-0.822809041	-1.10156285	-0.992335804	-0.965441797	-0.918778931	-1.022455388	-0.948841601
0.018067654	0.116627413	0.286871056	0.331351223	0.566076751	0.550902555	0.652318402	0.670022594	0.750475309	0.776139293	0.910599943	0.865520184	0.940446038	0.971310593	0.943640088	1.051761022	1.051146264	0.931415593	1.084961638	0.949287468	0.980495369	0.877290668	0.773031238	0.798631643	0.910514176	0.618953536	0.514069244	0.400917024	0.312602955	0.246577375	0.041193067	0.014238859	-0.263073176	-0.130251341	-0.237303834	-0.322747767	-0.569177884	-0.635820154	-0.586350837	-0.71576189	-0.8060062	-0.880870872	-1.054301592	-0.830568081	-1.000598906	-1.015956521	-0.975856513	-1.040372116	-0.92166602	-0.975934972
-0.030835923	0.156367122	0.36160922	0.495966012	0.55546703	0.52694024	0.385698894	0.322646596	0.269339352	0.082719779	0.063299562	0.206149787	0.477370664	0.637085475	0.555512809	0.727564508	0.706542746	0.526617842	0.29762674	0.191259955	0.115018372	0.0800068	0.24394777	0.368342098	0.536662553	0.573626803	0.551435055	0.526154424	0.311122055	0.205107959	-0.022111956	0.005394915	-0.026790192	-0.107084657	-0.321451274	-0.43309255	-0.536481617	-0.610556487	-0.483919942	-0.284917489	-0.196254425	-0.103070572	-0.147885168	-0.240826762	-0.446171816	-0.527207463	-0.693068358	-0.705290023	-0.571146353	-0.494895104
0.125376875	0.186469622	0.425095805	0.372082049	0.556542967	0.722168553	0.674726271	0.706737288	0.761504601	0.92616653	0.890182251	0.874778365	0.872873843	1.155803409	0.896793619	1.01455676	0.994093827	1.157831012	1.092064477	0.869336138	0.925630732	0.910913839	0.75046458	0.746805091	0.723485591	0.514392187	0.528439369	0.378506993	0.252464521	0.178458888	0.143513343	0.077943432	-0.229676867	-0.144527729	-0.432265194	-0.410027368	-0.625457074	-0.547175883	-0.732196699	-0.804197329	-0.644393917	-0.804134752	-1.050895236	-0.919362682	-0.966483593	-1.092067213	-1.02684896	-1.255600946	-0.982587914	-0.928834414
0.137505777	0.213267421	0.251980107	0.362616576	0.44379274	0.492805769	0.655691235	0.666439297	0.775027299	0.784515006	0.812125549	0.897890122	0.928829562	0.924392731	1.067326598	0.96043436	1.039604185	0.99296137	0.976486597	0.957376144	0.80046275	0.788603993	0.758758587	0.67270802	0.623216244	0.527868496	0.459235491	0.388407027	0.290443217	0.180368331	0.106833372	0.021666926	0.00276911	-0.178654448	-0.343171572	-0.358144091	-0.424586668	-0.574572137	-0.679511664	-0.69236925	-0.726308461	-0.717296687	-0.798961135	-0.844347539	-0.974905099	-1.00646983	-0.979614512	-1.012764781	-0.993488548	-0.965886204
0.230374573	0.517331908	0.660734671	0.570186721	0.558310607	0.537673239	0.576064303	0.737088594	0.795962878	0.696770363	0.903565845	1.105332302	0.994094058	0.932770909	0.752268066	0.938939851	0.87821083	0.905178224	0.90990047	0.900615942	0.837754467	0.736254191	0.755566766	0.750421691	0.551579925	0.603600509	0.700851307	0.61022994	0.649992937	0.535352837	0.256482745	-0.070093284	-0.355841593	-0.614924555	-0.598517592	-0.692125505	-0.732792544	-0.544521596	-0.454897281	-0.547871886	-0.760512331	-0.877646038	-0.872697666	-0.855793502	-1.076669413	-0.915624519	-0.879419907	-1.033221191	-0.761290204	-0.853650219
0.055469413	0.196762999	0.378026652	0.360962461	0.468308953	0.601729332	0.670458604	0.685003711	0.696403109	0.887838793	0.868804049	0.908451747	0.95752974	0.876211614	0.971999473	0.899998932	1.089635239	0.979070644	1.033437842	0.820239495	0.938645671	0.701151483	0.76521132	0.814190865	0.613793018	0.593979861	0.300623267	0.327911375	0.286198033	0.297739494	0.263142393	0.00073395	-0.062317443	-0.181744251	-0.357971123	-0.397653579	-0.485792063	-0.594262672	-0.513904024	-0.654931116	-0.909771413	-0.873881671	-0.884190433	-0.901475247	-0.939805071	-1.001801231	-1.044632219	-1.082822501	-1.021374413	-1.061633204
-0.008530272	0.14802473	0.195833009	0.393242909	0.365416671	0.545089567	0.683172944	0.842027464	0.675293744	0.784787505	0.796438222	0.890728578	0.932396437	0.928732553	0.925365348	1.074482292	1.068675854	0.943171464	0.867694011	0.853106673	0.901817756	0.869462102	0.774934735	0.735863618	0.464835274	0.407022744	0.329866659	0.434207971	0.302112064	0.171044937	0.095611847	0.016957646	0.03719927	-0.176918048	-0.29419797	-0.319597409	-0.520256279	-0.646619353	-0.60678568	-0.74293248	-0.741155292	-0.797458262	-0.876025481	-0.913152772	-1.118839845	-1.014534824	-0.960766853	-0.998002155	-1.000244961	-0.919734583
0.018450443	0.171010959	0.263788309	0.620947668	0.788929371	0.536655071	0.601315035	0.422159138	0.731930639	0.823115965	0.813748991	0.963306153	0.703250274	0.597883114	0.733415312	0.868565553	0.807579787	0.684053941	1.046194341	0.9401766	1.044171818	0.839320469	0.581333276	0.383963668	0.281029263	0.695328769	0.675500173	0.569829476	0.517811025	0.320518516	0.198938057	-0.026918509	-0.045334274	-0.374474638	-0.457089483	-0.682262558	-0.894075518	-0.461762166	-0.450115399	-0.292852463	-0.350133242	-0.661649157	-0.973146029	-0.940251014	-0.811067631	-0.649509958	-0.832599576	-0.880524053	-0.765291092	-0.761235071
0.26520474	0.346804371	0.455519914	0.639542262	0.554821557	0.654869006	0.729939634	0.712610716	0.697586436	0.836921757	0.889992788	0.802741503	0.900798369	0.972960229	1.141351704	0.983760589	1.027141129	0.973135127	0.952510756	0.823494909	0.840030689	0.903556572	0.613528395	0.691234162	0.631406202	0.720638499	0.688081953	0.691022311	0.482906159	0.384864556	0.294502689	-0.00757721	-0.172236621	-0.292960225	-0.522885127	-0.569528084	-0.660079941	-0.599800164	-0.615003028	-0.648042513	-0.647141032	-0.738208102	-0.784048154	-0.757861476	-0.97094676	-1.02141079	-0.907043855	-0.843925641	-0.965222507	-1.041583024
-0.058823265	0.152130734	0.355009662	0.404220752	0.383444627	0.54644328	0.662983368	0.767719396	0.683912132	0.886725006	0.842062426	1.009461342	0.904131966	1.018558207	1.15427602	1.010238621	0.880723317	0.883938524	0.950379047	1.017336765	0.854528939	0.856397288	0.708282338	0.709669847	0.581209144	0.6848006	0.585076998	0.383990434	0.207742354	0.223998594	0.101812554	0.049608768	-0.100276175	-0.055296003	-0.309888234	-0.370572606	-0.447524551	-0.698294152	-0.741529055	-0.69560186	-0.805556474	-0.82672433	-0.934835538	-1.031386318	-1.155946366	-1.108044185	-1.118176359	-1.0810607	-1.041331604	-1.084751445
0.147113008	0.143030276	0.378028989	0.428950781	0.43482468	0.472686574	0.64151935	0.684091006	0.922706649	0.85441041	1.018052335	1.005906405	1.04690887	0.984140823	0.975343607	1.009141429	0.896905632	0.87327366	0.972919395	0.982210313	0.878560403	0.771031679	0.877235911	0.705622565	0.682265384	0.55477741	0.511897599	0.396834446	0.392913062	0.245389164	0.075577626	-0.084200625	0.062858991	-0.24651282	-0.226456194	-0.431180757	-0.356478656	-0.596545356	-0.614765177	-0.705301628	-0.897927141	-0.92796367	-1.091023269	-1.052235196	-0.912612643	-1.043652034	-1.207407487	-1.061157246	-1.160558869	-1.167659155
0.017466588	0.182062837	0.340536965	0.263327848	0.474657602	0.540436523	0.641490293	0.732335527	0.920256445	0.788569703	0.951370364	0.952663406	0.940486517	0.975018063	1.03717955	1.082249524	0.74245354	0.956806473	0.892094629	0.936888127	0.851159929	0.844607631	0.738999843	0.784434058	0.962030081	0.543725684	0.376486607	0.447866797	0.239667181	0.136597068	0.003215502	-0.031045099	-0.125741825	-0.131370433	-0.263025666	-0.352194281	-0.496951659	-0.640097903	-0.607367862	-0.655385596	-0.881845777	-0.909099467	-0.92859112	-0.894770989	-1.015822228	-1.045347335	-1.047260896	-1.042142921	-1.033976256	-0.974922969
0.155993498	0.515547545	0.477933413	0.611565958	0.586598478	0.611234016	0.538217794	0.671750518	0.761110073	0.783165314	0.848279301	0.846855317	1.095933765	0.879549695	0.839142871	0.988437576	0.811846872	0.868065531	0.879084334	0.91460315	0.855466966	0.904704071	0.73772716	0.602931961	0.625662168	0.476097394	0.617162797	0.677076144	0.442201172	0.480839862	0.24320884	0.021632559	-0.2084579	-0.243757539	-0.54801095	-0.534081583	-0.427623047	-0.654679952	-0.549628287	-0.664701976	-0.909215577	-0.760166919	-0.899405501	-0.849950704	-1.080334156	-0.812572673	-1.021803668	-0.8462335	-0.979209121	-0.930355074
0.117611945	0.246546875	0.372423451	0.329971488	0.401381615	0.436031884	0.675173702	0.586814329	0.809196532	0.850847379	0.814012673	0.933660042	0.922638149	0.907193486	0.962106498	0.923677279	0.911409176	1.026951036	0.964509276	0.892348218	0.90826846	0.908499506	0.795703116	0.759148677	0.63717269	0.50971218	0.418103981	0.428612514	0.268675841	0.174408574	0.050232157	0.045502802	-0.078329841	-0.235178719	-0.286677261	-0.384031358	-0.542174939	-0.461387172	-0.582043294	-0.699745571	-0.804345879	-0.878036908	-0.894651917	-0.932400115	-0.920325225	-0.964841013	-0.929807032	-1.070146273	-1.046715639	-0.932620665
0.393873303	0.204295164	0.566580995	0.564963624	0.434060411	0.656790042	0.733710299	0.702102457	0.880182678	0.861617918	0.900622997	0.966157785	0.952662594	0.877182098	0.931759933	0.938482793	0.872967485	0.885123199	0.818573292	0.904819795	0.987257185	0.802315127	0.851400262	0.677789964	0.619542685	0.509107459	0.557778528	0.640846403	0.424304943	0.258530834	0.193374933	-0.015884164	-0.191837211	-0.405174469	-0.370160846	-0.439797306	-0.467523796	-0.45185531	-0.698664543	-0.659046278	-0.913188791	-0.732891176	-0.883040138	-0.948497923	-0.964937636	-1.051301762	-0.998732859	-1.05100011	-0.952798785	-1.017796316
-0.051155253	0.167538413	0.28853855	0.401712762	0.600110679	0.48376442	0.626426163	0.782367206	0.866316628	0.760371425	0.803075976	0.911597322	1.12940175	1.009535074	0.978368276	1.01140906	1.007305932	0.976904166	0.940051694	1.020840018	0.864822753	0.8416769	0.761223277	0.69397988	0.628883319	0.531380493	0.392332402	0.474488525	0.295264908	0.224383235	0.107077088	-0.094446334	-0.032195425	-0.252966555	-0.328057351	-0.380801136	-0.504067529	-0.477484617	-0.606863741	-0.729099969	-0.732152043	-0.804353429	-0.834506779	-0.882793516	-0.911497416	-1.037006712	-1.039483189	-1.053172581	-0.966027004	-0.991596999
-0.014789854	0.295107342	0.433699616	0.39908648	0.470236458	0.616105167	0.71232698	0.790641451	0.703606973	0.781819007	0.95037514	1.002965856	0.906325753	0.965862751	1.061478747	1.163080999	1.113715388	1.014129104	0.897564342	0.93080527	0.841733342	0.864676894	0.807593237	0.7539169	0.694374501	0.444009221	0.505491323	0.431161384	0.316831821	0.240969952	0.152392108	0.093842628	-0.070017496	-0.021825209	-0.341912198	-0.451931372	-0.412026392	-0.623154675	-0.733003602	-0.753867351	-0.843949188	-0.822948003	-0.946192165	-1.06706894	-1.010241036	-1.137862101	-1.062152182	-1.062361815	-0.986318433	-1.113473118
0.054893166	-0.017548071	0.242310249	0.402828881	0.559601296	0.49390349	0.835985405	0.625248949	0.54432473	0.837998003	0.958128823	0.78524905	0.908349172	1.039978561	1.010196616	0.959729276	1.01514641	0.892396909	0.878429261	0.95353963	0.955578603	0.855095529	0.808939734	0.808925929	0.633539482	0.528995483	0.418953032	0.374841302	0.350435627	0.221119058	0.220769509	-0.051342893	-0.101492897	-0.291631848	-0.407846283	-0.476218435	-0.534612932	-0.586618038	-0.672285633	-0.666602104	-0.742731477	-0.676903939	-0.836746784	-1.107277669	-0.938705364	-1.027793249	-0.857085279	-0.961164137	-0.951818622	-0.870301042
0.051752456	0.325751269	0.553095001	0.673676525	0.68975286	0.723601765	0.56197106	0.406762301	0.674803051	0.984475399	0.889702028	1.054475854	0.917752183	0.845108188	0.928779521	0.913561821	0.965721352	0.887602429	0.896333937	1.030081597	1.040069892	0.915730238	0.556834024	0.491040293	0.530515011	0.650659755	0.718295837	0.729253659	0.594705966	0.266502568	0.00376294	-0.105591424	-0.01691242	-0.263583812	-0.448633076	-0.716590654	-0.861394755	-0.71510579	-0.495367096	-0.451272394	-0.608510307	-0.853153713	-1.014411265	-1.026419303	-1.001937589	-0.953864931	-0.887054776	-0.93069749	-0.959851707	-0.876839379
0.08127026	0.258900549	0.307275941	0.408822426	0.407588926	0.474268203	0.662762196	0.650084525	0.70177264	0.852513411	0.885275655	0.888740212	0.99264291	1.022592762	0.980622019	1.028500041	0.950988872	0.916962932	0.961655487	0.953942244	0.836975034	0.863910837	0.830260041	0.692072019	0.556251018	0.451268761	0.455069557	0.32932136	0.409609427	0.259814386	0.124566754	0.058558603	-0.168833416	-0.215135604	-0.272334199	-0.33621578	-0.42689137	-0.578715917	-0.609557454	-0.728382212	-0.75345403	-0.842206216	-0.874825159	-0.956393845	-0.930282539	-0.989580357	-1.034479853	-1.020005653	-1.03587621	-0.935044479
0.048185841	0.184576677	0.413820853	0.526060324	0.527841512	0.459542292	0.303458845	-0.016754693	0.19393075	0.388339539	0.41956917	0.390802253	0.274787816	0.068809161	0.091953022	0.112942659	0.111301641	0.028099159	0.264323115	0.39317212	0.499645772	0.375042819	0.145700585	0.050492393	0.281672111	0.493202759	0.554073305	0.483809171	0.427655692	0.245481235	0.068492385	-0.022173956	-0.010610951	-0.237235914	-0.43300385	-0.536580333	-0.59345082	-0.591440428	-0.347602121	-0.066539045	-0.088781572	-0.347853972	-0.377701319	-0.346851513	-0.206599527	-0.118280085	-0.081856768	-0.136929654	-0.130898505	0.036194397
0.113522568	0.1483216	0.205702732	0.50106965	0.489551906	0.626063344	0.604769385	0.86133298	0.713772967	0.993446256	0.845603965	0.921717952	0.884614285	1.137545426	0.998848931	1.061997174	1.028378505	1.006275333	0.992660971	1.032493839	0.911599989	0.772347675	0.798104484	0.807302392	0.688297614	0.732137976	0.454957027	0.287242072	0.205409254	0.338486129	0.106583243	-0.003090842	0.031472512	-0.224576795	-0.398772482	-0.444574966	-0.380507611	-0.616095574	-0.607172639	-0.707594169	-0.752179759	-0.795911225	-0.975971364	-0.905282352	-0.917210652	-0.99066661	-1.001940077	-1.046403285	-1.087880685	-1.059020828
0.208376223	0.228213792	0.185852205	0.381679877	0.443207012	0.529926296	0.64396561	0.787586753	0.815424278	0.816342134	0.89305403	0.966624973	1.027681482	1.033461325	1.023317568	1.013635708	1.016795844	0.968199301	0.977264698	0.827445914	0.830561649	0.918239602	0.739361343	0.768070928	0.674428931	0.611356607	0.404959019	0.30326955	0.384295551	0.233786369	-0.007486749	0.047936488	-0.17298056	-0.216043911	-0.177269445	-0.372544146	-0.491031616	-0.572020068	-0.704767206	-0.666219355	-0.739196411	-0.782823791	-0.817501028	-0.942225083	-0.942631179	-1.040893933	-1.034577169	-0.974770745	-0.899758506	-0.858862174
0.066502744	0.222968781	0.193784565	0.386629083	0.401919817	0.621287247	0.706351178	0.770159484	0.768162603	0.921320431	0.902338502	0.901546139	0.919725371	1.044859142	1.080187173	1.141981237	1.082901347	0.981805713	0.963541043	0.865408164	0.975178684	0.898851478	0.850961609	0.693640032	0.562108623	0.488020172	0.433844994	0.558538292	0.364043748	0.135803699	0.19201251	0.06559312	-0.015682544	-0.128516056	-0.352252499	-0.446871081	-0.511240071	-0.601827704	-0.690312778	-0.686793996	-0.864158408	-0.864504982	-0.84390286	-1.129054088	-1.030791079	-1.081666832	-1.039932621	-1.080166913	-1.000379299	-1.085155519
0.047968327	0.226662428	0.489718643	0.538519233	0.642372425	0.600011489	0.453783275	0.218103553	0.444237528	0.676407825	0.734563568	0.900542529	0.797985376	0.642834044	0.661093034	0.63775947	0.634607643	0.718541836	0.749797139	0.870935239	0.830339183	0.713014573	0.520637563	0.406869157	0.404594334	0.611716943	0.545462729	0.562782294	0.363502067	0.26944463	0.074659993	0.053255537	-0.057687096	-0.180470346	-0.430354065	-0.644562464	-0.706006727	-0.599431762	-0.4374921	-0.273050948	-0.518228954	-0.724502398	-0.88498742	-0.881589858	-0.684945124	-0.676990344	-0.800230298	-0.542572783	-0.689686632	-0.719641022
0.054465007	0.206952158	0.219456831	0.332279412	0.431949168	0.532406592	0.645840259	0.72396954	0.851079264	0.815648199	0.875557069	0.892749201	0.974866359	0.981588534	1.053126576	0.988181354	0.957304195	0.958783548	0.996791812	1.003919426	0.911463066	0.85909989	0.736849566	0.671360252	0.845331294	0.708505901	0.503681768	0.454279333	0.334907075	0.069517864	0.050778611	-0.10312968	-0.079804459	-0.133098096	-0.330470368	-0.331506903	-0.412261289	-0.735908055	-0.718096185	-0.620701433	-0.885440727	-0.76782279	-0.837598182	-0.993582377	-0.932931106	-1.001373955	-0.998945231	-1.009270249	-1.060638347	-1.119055936
0.224347347	0.254596266	0.281279851	0.439973053	0.472941427	0.559374182	0.708173734	0.77109806	0.733254452	0.842185314	0.867672976	0.943698784	0.92550833	1.022778493	0.946688711	0.977847911	1.217066596	0.959878608	0.924387556	0.887479081	0.856757382	0.89180982	0.84524935	0.745973976	0.439643463	0.5169517	0.529156087	0.516636118	0.272068061	0.182857839	0.12277704	0.04205565	-0.08410362	-0.056154964	-0.320882978	-0.307483127	-0.492819711	-0.691573641	-0.705293336	-0.757256545	-0.841638068	-0.860148567	-0.959255619	-1.034531756	-0.87117778	-0.96013283	-0.947064159	-1.032161532	-0.855046074	-0.808152543
-0.173539994	0.28483053	0.345305954	0.450092998	0.516706025	0.633244139	0.662857205	0.778121843	0.855959722	0.798521627	0.919380947	0.922618062	1.025300976	0.934611698	1.088671405	0.990654589	0.936903128	0.935171118	0.871595835	1.047808762	0.807070144	0.760525082	0.74133689	0.906416192	0.66816184	0.607810313	0.424622005	0.409884306	0.185297831	0.229755986	0.05695648	-0.054083795	-0.088292529	-0.152582194	-0.370735753	-0.520680136	-0.374460712	-0.465449759	-0.648584017	-0.571264913	-0.964771893	-0.64425014	-0.668224113	-1.013721176	-1.019795379	-1.065202487	-1.010417135	-1.032227432	-0.948406066	-0.914567747
0.090032789	0.308136808	0.279913025	0.461085455	0.488401988	0.529293586	0.513320553	0.669343481	0.824851599	0.806351327	0.886200291	0.918805873	1.041244306	1.015546174	1.020243658	1.056156031	1.066925293	1.048980362	1.094332067	0.903101971	0.9434928	0.781551502	0.796751637	0.824339806	0.740529236	0.626907052	0.472412643	0.382695016	0.184516823	0.238114746	0.071070235	-0.005434294	-0.122658444	-0.213285295	-0.229035665	-0.351271783	-0.582623672	-0.598009115	-0.608342464	-0.679509053	-0.826129844	-0.909762244	-0.930538281	-0.976962023	-1.043447055	-1.112497274	-1.062348694	-1.057029888	-0.985290367	-1.092298018
0.061140711	0.227202727	0.271397832	0.454952528	0.56102398	0.613652776	0.658269436	0.696597424	0.789931556	0.81624309	0.96571589	0.859981356	0.938234621	0.917360641	1.089824986	1.031819518	0.924950279	0.864261244	0.949516356	0.960447109	0.902934246	0.775886929	0.68211053	0.670764529	0.633706113	0.586252207	0.472318304	0.417210492	0.361397023	0.299369394	0.000131857	0.021721744	-0.164554465	-0.202159904	-0.317379457	-0.44385084	-0.354296636	-0.610285593	-0.510689802	-0.767657437	-0.720900858	-0.836651611	-0.950263075	-0.928368081	-1.005833953	-0.969491357	-1.078782705	-1.032959019	-1.042257427	-0.920703949
0.135647316	0.087115734	0.288817073	0.362211801	0.445003377	0.601213218	0.679934091	0.717733776	0.74121298	0.779482187	0.836304682	0.857292328	0.922672843	0.986320252	1.005023356	0.920839363	0.965615715	0.988989894	1.016068153	0.946134769	1.025872051	0.901878493	0.695523168	0.786146585	0.641687972	0.493086833	0.46690053	0.416654803	0.233989433	0.170634116	0.057347571	-0.0915609	-0.105429936	-0.160271209	-0.3822179	-0.378702685	-0.481661749	-0.572821522	-0.649579479	-0.688787093	-0.746239751	-0.778034377	-0.909326369	-0.987189463	-0.952741168	-0.86872907	-0.970019235	-1.033444465	-1.052050428	-0.989398129
0.079338372	0.012103539	0.127110536	0.347831255	0.230747521	0.288282362	0.453422922	0.536904603	0.685990576	0.69224331	0.629806519	0.805139321	0.756170702	0.845463755	0.918997668	0.938197451	0.868734944	0.845058983	0.822807071	0.788787141	0.741781906	0.569245982	0.534292635	0.495174056	0.473787632	0.354046117	0.245356647	0.180540164	0.225645231	0.091319308	0.119805039	0.019975392	-0.076695126	-0.068860385	-0.113880859	-0.29941793	-0.313168969	-0.369477603	-0.471808985	-0.458500141	-0.468908129	-0.540329026	-0.614111387	-0.812687937	-0.857385569	-0.883725482	-0.935155464	-0.966006138	-0.936461728	-0.961727459
0.048933255	0.094380769	0.251776204	0.395926645	0.538342224	0.491086207	0.688551603	0.654600484	0.721891762	0.953155902	1.011897578	0.940784625	1.076018108	1.015074868	0.990839981	1.013401768	1.010763386	1.066463328	0.946431564	0.993502928	0.967675476	0.790521312	0.773896861	0.709861553	0.641286127	0.694594688	0.496845645	0.404170293	0.357122014	0.259830927	0.203753937	0.127060694	-0.09167212	-0.297815962	-0.501815095	-0.471801549	-0.610798371	-0.568786921	-0.595741757	-0.761986206	-0.735025756	-0.941620973	-1.048950463	-0.909070576	-0.941359753	-1.082262121	-1.056782183	-1.061358006	-1.200390875	-0.90457818
0.159519482	0.278358326	0.274632955	0.311930242	0.290121939	0.634221192	0.785537655	0.569884217	0.693979295	0.926485706	0.929100677	0.980661652	1.061719225	1.176109111	1.062338039	0.977859507	1.177266936	1.112953486	1.069835289	1.066861806	0.829993304	0.881186505	0.599377928	0.761808461	0.701637114	0.570527181	0.553521101	0.433654327	0.312884615	0.209648213	0.130910885	0.008334145	-0.114296606	-0.314859229	-0.328985197	-0.432708318	-0.438289146	-0.56691183	-0.69147577	-0.735478927	-0.925604358	-0.747092725	-0.911616206	-1.015960383	-0.922338607	-1.04109855	-1.172464399	-0.998293797	-0.916932256	-1.272568871
-0.017059223	0.096598183	0.156470575	0.281151963	0.366225763	0.416464268	0.494002326	0.511745439	0.531689143	0.504643678	0.642594466	0.634291815	0.763892766	0.832782068	0.961919295	1.090146782	0.974393129	0.806098589	0.859769823	0.7973817	0.604180006	0.532374425	0.519641041	0.490514291	0.472144932	0.418121229	0.318610482	0.310867671	0.226733277	0.084415253	-0.046668313	0.098690446	-0.139935052	-0.026892716	-0.18380987	-0.384494862	-0.348473794	-0.468239568	-0.523251368	-0.480619388	-0.600915456	-0.578796951	-0.546291141	-0.705359691	-0.830260377	-0.768628185	-0.987587605	-0.968394132	-0.945477983	-0.901291535
14.86194379	1.158253425	3.634048028	5.05307064	1.096298145	-12.63647798	-5.356090614	-2.492252497	-1.50006981	2.288294922	3.202519223	21.58714523	4.973730101	0.955093737	-0.843940935	12.2915547	11.92549584	11.74226358	5.886386459	10.64243368	20.14177977	2.145847148	-2.45697108	-5.232552579	-14.63267464	-4.135985785	-20.78841497	-6.240862008	-9.874578356	2.712636559	13.48838519	17.51460379	15.08904984	-3.768216421	-1.751271381	-3.246495404	-11.75344213	-8.849798922	-13.05504184	-3.377053032	-8.627365335	-1.013205181	2.256574652	-6.783115076	16.69506468	12.33640326	-8.179401734	-19.82227201	-2.294087903	12.26923858
-0.0070692	0.304529814	0.316381936	0.699763965	0.584803296	0.616195164	0.233945761	0.216736511	0.549646512	0.78211887	0.899836136	0.7000807	0.625304841	0.58364105	0.443812773	0.583608458	0.549797772	0.616083306	0.658031866	0.772750769	0.627812143	0.603672123	0.630287696	0.318518392	0.329715997	0.568376616	0.619947094	0.701635097	0.569900835	0.212738234	0.025410819	-0.030007945	-0.137555263	-0.12852304	-0.270067064	-0.452085629	-0.655610221	-0.5588211	-0.372122094	-0.242693397	-0.498051463	-0.759965613	-0.887418042	-0.630901031	-0.72773018	-0.581204721	-0.582783925	-0.543575375	-0.574721732	-0.50230769
0.240630501	0.298302897	0.353782216	0.379638939	0.470487242	0.526766677	0.505626465	0.742548438	0.743198235	0.709520505	0.701448848	0.842032489	0.944107009	1.097725783	0.789480804	0.99586543	0.970849392	0.833394267	1.105411114	0.83238488	0.730594442	0.769942183	0.656014793	0.720383624	0.6918531	0.676148236	0.48817197	0.372003779	0.308479996	0.101497648	-0.083871182	0.01702279	-0.163507733	-0.054290227	-0.298049322	-0.533404147	-0.545922734	-0.464560611	-0.620205953	-0.795569192	-0.785935964	-0.80811057	-0.963578055	-0.823876345	-0.855706445	-1.059683265	-1.158416003	-0.999113486	-1.013416473	-0.959874428
0.150766042	0.09947365	0.244969075	0.268060387	0.587248349	0.563684649	0.46782505	0.713479347	0.914468013	1.009433874	0.891319845	0.847347129	0.9939529	1.011061958	0.973579438	0.944481403	0.912574822	0.902731415	0.940514287	0.910850293	0.875677808	0.75090263	0.839794499	0.756914222	0.671133247	0.611794408	0.486184961	0.38518448	0.337039956	0.148227613	0.080183268	0.054042342	-0.119706526	-0.181196147	-0.39640646	-0.24451428	-0.396894694	-0.557022961	-0.52987168	-0.799281424	-0.825026929	-0.990959841	-0.753922113	-0.809858188	-1.051873268	-0.882120664	-1.073483552	-0.998140706	-0.992298662	-1.049540454
0.040980597	0.196337364	0.244077225	0.363266282	0.430878656	0.455846429	0.684983038	0.802261585	0.979156116	0.901142586	0.959279693	1.047871842	0.892507889	0.96517478	1.068104007	1.049836342	0.90267405	0.988374532	1.047685871	0.986153568	0.888709348	0.77641018	0.874674239	0.807062693	0.468869937	0.422309823	0.497488434	0.496860188	0.090767788	0.189250028	0.051287841	0.103883592	0.009051284	-0.226766574	-0.269246473	-0.376064617	-0.44221918	-0.66504054	-0.773578096	-0.877379566	-0.835022548	-0.874652806	-0.929104542	-1.104827021	-1.182598783	-0.995428065	-1.080512918	-1.097625085	-0.987041754	-1.05450034
0.053397774	0.223869184	0.34907448	0.450846103	0.473813549	0.603941804	0.543353762	0.686576631	0.869865839	0.737862891	0.754264305	0.929817148	0.819523346	0.877982251	1.080478959	0.953718238	0.943935202	1.177324772	0.806413212	0.876604088	0.83297375	0.806944342	0.70536506	0.768582174	0.751516106	0.672201365	0.434594969	0.422764349	0.23365508	0.285010106	-0.022667402	0.031336305	-0.079497464	-0.134726189	-0.267321852	-0.393626579	-0.478128986	-0.4571307	-0.757895648	-0.882330137	-0.808480907	-0.853054442	-0.894378769	-0.950909321	-1.214398383	-0.931721974	-1.018918115	-0.894653083	-1.065925822	-0.937278353
0.266910828	0.300733772	0.508448093	0.566110748	0.609399303	0.698870216	0.639071949	0.634148756	0.640626862	0.839428612	0.851060837	0.883742619	0.952294345	0.936893292	0.855016176	0.809495105	0.82880743	0.894189231	0.891407614	0.866593492	0.872064137	0.909562876	0.689570365	0.637831514	0.524422617	0.45775073	0.480614317	0.596760909	0.513801137	0.441347816	0.195642792	0.049294895	-0.230182144	-0.386965648	-0.369574999	-0.616180085	-0.552693035	-0.639365992	-0.592659694	-0.601025862	-0.823768532	-0.776677354	-0.916342983	-0.995678968	-0.855936569	-1.023081031	-1.006450851	-0.973961971	-0.941218693	-0.914394114
0.41913926	0.285013753	0.079652452	0.665437264	0.404189424	0.462247324	0.449364042	0.352342439	0.796786663	1.169207107	1.297153177	0.904037031	1.010808114	1.107426639	0.616686254	1.113949536	0.782973731	0.872270443	1.182036714	1.352441201	1.116796629	0.461808847	0.661714396	0.708156239	0.555521854	0.409721383	0.530047927	0.546779305	0.38775966	-0.062024032	0.023418562	0.085110858	-0.117759862	-0.216883113	-0.682578682	-0.459005844	-0.013419294	-0.817726184	-0.568442235	-0.242052268	-1.163286441	-0.869106182	-0.619902537	-1.049202939	-0.990436103	-1.225344054	-1.017553382	-1.26949361	-1.099462569	-0.596589664
0.108077313	0.128582618	0.280307492	0.472044751	0.518999855	0.532398321	0.724702433	0.654209433	0.686622669	0.795450166	0.981103808	0.959189103	0.974474666	1.068180352	1.084469295	1.040266906	1.048351179	0.958187372	0.856207792	1.026079765	0.952526897	0.756812827	0.976902191	0.65144191	0.635419651	0.602168565	0.549843916	0.447482819	0.263978248	0.083009601	0.129154223	0.140005216	-0.050818373	-0.223754992	-0.324716066	-0.464141978	-0.533549851	-0.645892828	-0.695664294	-0.843035738	-0.927282788	-0.844670278	-0.876960302	-1.038485559	-1.048978837	-1.123603822	-1.013485636	-1.184484868	-0.887888245	-1.084457616
0.10680099	0.241159496	0.524842527	0.704286122	0.699552463	0.739304251	0.554879869	0.443512302	0.625051747	0.939414835	1.082975363	1.065674123	1.02763545	1.017402122	0.924925598	0.979226343	0.907514705	0.968237095	0.999178619	1.139336284	0.933901184	0.878912921	0.798816474	0.330677607	0.535931372	0.700600536	0.87103127	0.625703794	0.479787874	0.292798415	0.115746287	-0.031048471	-0.097956025	-0.255891018	-0.413195575	-0.682013393	-0.797281586	-0.67535543	-0.489041867	-0.489075116	-0.59808966	-0.871249191	-1.042712927	-0.878041574	-0.986189295	-0.991140719	-0.842703978	-0.936157873	-0.820081036	-0.958881067
0.271285414	0.397563917	0.60222948	0.560168273	0.695350203	0.517512916	0.659356267	0.603761071	0.77716739	0.768690174	0.955585321	0.763406003	0.891261717	0.881087191	0.82398125	0.925595772	0.800307103	0.866823238	0.961655789	0.883409634	0.875809168	0.738153399	0.752673163	0.554043709	0.554197061	0.576725249	0.604756441	0.722002118	0.512697877	0.61928875	0.321288426	-0.040560022	-0.211982889	-0.368591998	-0.583589428	-0.577822939	-0.618009648	-0.56152293	-0.536185946	-0.539333125	-0.610507576	-0.867711045	-0.896282209	-0.949771579	-1.072224833	-0.878894713	-0.95568171	-0.965836133	-0.977502865	-0.836214681
0.129813342	0.106544856	0.209187868	0.367432249	0.487128801	0.475823224	0.723872723	0.725467212	0.772085561	0.777757628	0.867578589	0.881570399	1.086898795	1.141266203	0.923081287	1.067379626	1.121858692	0.807738972	0.897997127	0.88492043	0.872525324	0.778709896	0.745896533	0.732564237	0.812184361	0.671441942	0.484664096	0.436630835	0.251379826	0.233643533	0.111744107	-0.068072772	-0.123554829	-0.08805275	-0.322994348	-0.504261797	-0.48441721	-0.504054485	-0.783529713	-0.822946014	-0.915108854	-0.840856028	-0.907956102	-0.895930665	-1.268612027	-1.190035144	-0.909874814	-1.092017289	-0.99175814	-1.113564745
-0.118973128	0.284858865	0.227560247	0.489462739	0.549627536	0.577390774	0.461257793	0.828630606	0.867230868	0.919387552	0.89882982	0.871068404	1.002739671	1.03806081	1.003437376	1.064692512	1.156501672	1.033561985	0.92945388	0.961710047	0.820403835	1.029720932	0.80881591	0.859813976	0.618551392	0.535460319	0.459235516	0.493035441	0.196352395	0.285720861	0.01749706	0.130902411	-0.077268056	-0.195102875	-0.353070066	-0.611415096	-0.601194384	-0.562243589	-0.782579507	-0.795260392	-0.960510058	-0.845919356	-0.898891774	-1.133238638	-1.117100638	-1.081434765	-1.033937773	-1.03532492	-0.944441876	-1.064502372
0.026149669	0.148051444	0.332811489	0.520316627	0.513999468	0.575427938	0.476011678	0.253621247	0.165258402	0.016936741	-0.022115696	0.123113034	0.212973346	0.367613203	0.500039078	0.600231172	0.513501875	0.438450964	0.21547017	0.093386559	-0.038896223	-0.019970412	0.1760703	0.348366953	0.473443183	0.589435653	0.518402742	0.506059297	0.305448416	0.236427202	-0.023559937	-0.030519084	-0.03761903	-0.181785398	-0.352025687	-0.456221366	-0.553965867	-0.561649795	-0.463955731	-0.27908781	-0.119131027	-0.007579942	-0.029989026	-0.143883501	-0.268313864	-0.436890266	-0.504162134	-0.598313206	-0.473065872	-0.397970003
0.177623197	0.100810888	0.479606093	0.66691685	0.633008721	0.649381929	0.638780885	0.388200808	0.662239644	0.651797914	0.989222439	0.808199067	1.02522249	0.825658699	0.778665494	0.686472661	0.76693251	0.822130367	0.839129712	0.861334081	1.002928295	0.633763613	0.626789103	0.501650019	0.584216839	0.568576682	0.838063296	0.475756861	0.355163916	0.21109072	0.010804948	-0.054757627	-0.21096089	-0.176443496	-0.46603223	-0.631916276	-0.656195159	-0.712096384	-0.3899814	-0.45333597	-0.658953167	-0.839150488	-1.116792567	-0.740123916	-0.71495852	-0.751601842	-0.816463193	-0.668662914	-0.871019082	-0.694728373
0.070621455	0.187488709	0.428065711	0.669860194	0.764399617	0.728718242	0.433874681	0.466553555	0.606987657	0.91056843	0.904090793	0.98297532	0.929489052	0.917684692	0.883727085	0.924904569	0.906174631	0.962162824	0.87014047	0.996599394	0.962701413	0.871056888	0.54930217	0.473469321	0.460670337	0.741663514	0.670380814	0.581047343	0.472325781	0.163860149	0.071572118	0.014052805	-0.060448541	-0.233489567	-0.521162863	-0.706462546	-0.736800103	-0.590620746	-0.50735598	-0.461202825	-0.601272445	-0.86624839	-0.987177568	-0.937813424	-0.989958163	-0.799905786	-0.861707155	-0.892646124	-0.917713112	-0.871378381
0.033403866	0.2883904	0.435839711	0.498749829	0.576396244	0.50803795	0.587310818	0.646557039	0.793267848	0.910374504	0.979980641	0.905945553	0.977840406	0.884200967	0.879183695	1.025639953	0.883557575	0.879023736	1.006832355	0.998547279	0.926108529	0.774359273	0.774131608	0.652324141	0.574167717	0.669992604	0.61301028	0.484825587	0.563488302	0.486865397	0.203188171	0.098900043	-0.183302166	-0.346817551	-0.417015806	-0.561915853	-0.508024827	-0.647647881	-0.649174092	-0.646886568	-0.65697201	-0.901396831	-1.029443199	-0.834796212	-0.837048764	-0.951096085	-0.922904601	-0.847423905	-0.911871138	-0.974988872
0.122486039	0.201744112	0.221316814	0.331225139	0.445509849	0.518794787	0.516852544	0.680347296	0.809161663	0.827781477	0.960309313	0.829659732	1.142917113	1.113772473	0.862401051	1.051269792	0.930501664	0.85291515	0.855139994	0.753912335	0.686886177	0.755413715	0.836219909	0.708082046	0.635795542	0.618855858	0.527444552	0.247470191	0.341572656	0.170561652	0.049673852	-0.004740237	-0.179784569	-0.166219574	-0.325171379	-0.362034443	-0.370641306	-0.612406066	-0.667890683	-0.690244434	-0.867134109	-0.933885908	-0.921525264	-1.006842618	-0.809812151	-0.913864904	-0.93784808	-0.975274225	-1.037744378	-1.013999516
0.11854872	0.198562683	0.184665947	0.413712568	0.528699584	0.590977388	0.673515578	0.674819019	0.669771781	0.788760034	0.874365686	0.839245144	0.931553307	0.972837085	0.962162607	0.949703893	1.01555767	1.004643921	0.955923843	0.923791727	0.916630616	0.838458904	0.712725827	0.646543172	0.747704198	0.505349808	0.542667133	0.409619344	0.328498484	0.189835748	0.142850553	0.05972755	-0.087237624	-0.252493675	-0.160170243	-0.468888883	-0.468099553	-0.543344751	-0.686410021	-0.750499266	-0.758489254	-0.859607169	-0.844338569	-0.969650356	-0.821357453	-0.873964628	-0.954535973	-0.926701501	-0.987275773	-0.92714301
0.009977528	0.228230707	0.426363492	0.653519047	0.775012028	0.562328956	0.538025468	0.279537388	0.570137645	0.745513684	0.954820072	0.809362301	0.743980036	0.765175956	0.613388595	0.784985818	0.657588498	0.73686619	0.791618597	0.836926205	0.830655578	0.680002849	0.56514484	0.306146324	0.495630598	0.67519622	0.619566971	0.665306913	0.491397994	0.340486613	0.089089354	-0.096335649	-0.043833046	-0.199739944	-0.417258923	-0.535115265	-0.69134306	-0.581303877	-0.456652865	-0.39623795	-0.5223019	-0.707597453	-0.931954958	-0.892379544	-0.874727011	-0.854038859	-0.754983829	-0.682489783	-0.668162796	-0.7281701
0.021277959	0.176273173	0.369050363	0.508873544	0.616503601	0.526416048	0.411113097	0.19200861	0.018273559	0.125720768	0.11480192	0.106320254	0.026791041	0.168902658	0.332417721	0.389161267	0.342363825	0.175234489	0.078901804	0.118270502	0.161568208	0.141894437	-0.030607334	0.199206436	0.403882401	0.593297491	0.585204192	0.492494376	0.423557582	0.225984135	0.041132461	-0.019708031	-0.06616282	-0.220876159	-0.403230073	-0.500698581	-0.599659797	-0.502853518	-0.415201597	-0.216943461	-0.003352227	-0.141577995	-0.20021822	-0.092509409	-0.01192836	-0.239769534	-0.281431638	-0.393590879	-0.35807721	-0.228899229
0.169083073	0.332413559	0.504868733	0.546172365	0.593109495	0.680829185	0.809344407	0.776941809	0.700407048	0.698922384	0.699767358	0.85665903	0.881902024	0.9706288	1.01297907	1.01375657	0.956736048	1.021866437	0.976477722	0.908131157	0.817147666	0.828616094	0.63552818	0.816114313	0.684562149	0.683169691	0.740928127	0.630107483	0.49255004	0.427420722	0.123339064	-0.105771422	-0.213686522	-0.369334878	-0.629967742	-0.589255958	-0.443887832	-0.699780441	-0.558445547	-0.657344116	-0.702017658	-0.715056881	-0.784245445	-0.775153356	-0.853290192	-0.888853774	-0.88069187	-0.853112028	-0.913804343	-0.943631063
0.134842016	0.334503403	0.312761931	0.290689931	0.528713604	0.67602967	0.630489341	0.731758208	0.933440925	0.864277511	0.89896552	0.930120507	0.95008042	0.852658169	0.930840256	0.996100946	0.855174914	1.040371538	1.006687105	0.934650916	1.014009414	0.877767727	0.979662049	0.634452899	0.501816278	0.483804246	0.443057715	0.378079878	0.383729284	0.103741098	0.064295948	-0.019039828	-0.07990406	-0.157354149	-0.036654269	-0.425566418	-0.468435458	-0.347321077	-0.575435831	-0.700072637	-0.778566156	-0.77649177	-0.919978512	-0.936247516	-0.878462864	-0.989384482	-1.051341942	-1.133636736	-0.986077369	-1.034347915
0.123433784	0.074870834	0.348509289	0.438354717	0.479371157	0.71221546	0.560763986	0.743418562	0.835712159	0.899930294	0.861485034	1.012351348	0.949808577	0.977850992	0.980755858	1.03419276	0.988909456	0.783589862	0.849805612	0.924621041	0.846771648	0.892704092	0.826787578	0.70898038	1.012650728	0.504878457	0.570775946	0.368428604	0.160997907	0.139763676	0.141075509	-0.05040494	-0.113309291	-0.103405302	-0.33698484	-0.381463532	-0.499513997	-0.521196104	-0.680186461	-0.64187037	-0.756837699	-0.93371768	-0.858678373	-0.939223827	-0.933948049	-1.050763877	-1.046542137	-0.936197035	-0.945979782	-1.098704262
0.122227043	0.437488759	0.467000546	0.559324181	0.637482303	0.574193205	0.597223341	0.563520568	0.821360851	0.756941335	0.913813282	1.008465025	1.139586786	0.921563919	0.949736436	0.911557579	0.981901654	0.905391013	0.907053703	0.835791504	0.993376068	0.785629649	0.719744368	0.645847944	0.621784727	0.628951161	0.668959028	0.630129709	0.555519026	0.664032885	0.233430488	0.040407705	-0.123234548	-0.43307102	-0.572663266	-0.523481992	-0.503236341	-0.543288814	-0.579320308	-0.538904246	-0.710949989	-0.94276706	-0.952973423	-0.912010245	-0.914575042	-0.841869505	-0.858302237	-0.919988776	-0.83136975	-1.00356221
0.139895826	0.310141774	0.376014127	0.374339329	0.478255222	0.647183661	0.6144041	0.704620276	0.70167453	0.849285775	0.844935646	0.95331042	1.115666163	0.895120869	1.021787427	0.839921055	0.991548752	1.067364934	0.980106632	1.081289074	0.86026088	0.850395091	0.934893071	0.807655705	0.542795137	0.527208861	0.545116572	0.325174933	0.053315912	0.159971464	0.073931814	-0.020221762	-0.0502083	-0.098654951	-0.208615319	-0.391738679	-0.443485123	-0.465868665	-0.65264828	-0.743097122	-0.839637644	-0.818499056	-0.895786809	-0.974687085	-0.838893222	-1.062257243	-0.971477619	-0.962517099	-1.000991371	-1.0775005
0.090125896	0.130027148	0.167386739	0.462089042	0.531017332	0.594463699	0.6770916	0.651001278	0.876039331	0.901613702	0.968956729	0.935025999	0.969980666	0.975547667	0.966222304	1.037561675	1.093963568	1.077418077	0.959546943	0.969819842	0.828385171	0.82191432	0.76271541	0.737567267	0.711218346	0.566856919	0.602527297	0.415822225	0.281116452	0.183597889	0.200865268	-0.048228568	-0.153388	-0.17227311	-0.255292843	-0.329284612	-0.575226616	-0.603044054	-0.711506974	-0.718068399	-0.798241382	-0.885417755	-1.043890718	-0.921162368	-0.955633863	-1.115266178	-1.051263481	-1.016086862	-1.079129331	-1.017541325
0.084909898	0.221676448	0.068450946	0.405573762	0.366436294	0.585343718	0.775713323	0.641114314	0.836737005	0.89298355	0.726537244	1.217748995	0.901553995	1.111353634	1.095265199	1.032674565	0.95646664	1.00621518	1.003755224	0.994154237	0.777173085	0.867069801	0.858811274	0.647355405	0.616476385	0.583432039	0.41428877	0.373203186	0.296020188	0.226445904	0.135482784	0.017744129	-0.086730665	-0.167905893	-0.340479083	-0.48621334	-0.41209926	-0.583235654	-0.788286043	-0.739651499	-0.754283772	-0.70463492	-0.917023894	-1.03657698	-0.909879057	-0.964907062	-1.065345127	-0.879374792	-0.977448532	-0.875629153
0.17571935	0.217264153	0.254480727	0.404242785	0.54283869	0.59340747	0.609870275	0.830007333	0.815363885	0.927194582	0.858450235	0.902052662	1.062714565	0.979020669	0.862458633	1.001315458	1.000261321	1.013993962	0.929919682	0.91792504	0.888272527	0.835718237	0.721338821	0.736807871	0.240480087	0.603762834	0.56058202	0.347342857	0.26514377	0.151199136	0.046314528	-0.000377519	-0.095142999	-0.136020599	-0.25270136	-0.452011532	-0.402352914	-0.591419391	-0.652954045	-0.7864358	-0.733814331	-0.772513237	-0.99180992	-0.946846271	-0.916902262	-1.009155173	-1.12366346	-1.14082059	-0.888334362	-1.055830912
-0.02345382	0.161743496	0.23812982	0.346258808	0.458971312	0.508088078	0.446792225	0.430929899	0.28201971	0.4641801	0.384281271	0.443803117	0.659531297	0.744511517	0.845168356	0.943065358	0.866888518	0.786047476	0.616018725	0.543057929	0.413519851	0.310015068	0.35796625	0.439543798	0.468215157	0.510901326	0.483025279	0.272829231	0.33198377	0.096173843	0.068970946	0.001617124	-0.041498242	-0.016275424	-0.172626184	-0.348558828	-0.446117745	-0.448290565	-0.600964259	-0.467570801	-0.376783717	-0.463470156	-0.374413088	-0.536922162	-0.667247397	-0.827975994	-0.859874453	-0.837563797	-0.868186567	-0.806804378
0.111016196	0.383766701	0.55134152	0.489045764	0.674377269	0.635460145	0.877868016	0.733605376	0.510791228	0.644140164	0.766125611	0.748815989	0.840520467	0.872992767	1.098287916	0.940121523	1.00138263	0.820786986	0.879082499	0.823006693	0.764963657	0.721513649	0.747280438	0.637430847	0.613378288	0.744390429	0.675127721	0.675032191	0.50557093	0.310917056	0.235437042	-0.105092329	-0.189212919	-0.205320225	-0.457687839	-0.726806447	-0.643527373	-0.656594368	-0.538756405	-0.700148068	-0.744459156	-0.722591519	-0.621095564	-0.614265271	-0.779410053	-0.798649691	-0.847200727	-0.871850401	-0.811800358	-0.776123327
0.09854156	0.339614995	0.189173185	0.294293201	0.449273394	0.629968304	0.735179288	0.696630658	0.715535308	0.735700836	0.833010816	0.891551691	1.007604424	0.980431651	0.955360789	0.958291568	0.958753815	0.912290636	1.090289411	0.951578123	1.00908645	0.843989651	0.786671046	0.65833206	0.72990246	0.614842881	0.410551256	0.261454962	0.352149934	0.107666585	0.17620625	-0.058718807	-0.018761082	-0.129303243	-0.166151902	-0.412435311	-0.437730066	-0.677995373	-0.670668447	-0.694995825	-0.825362682	-0.827034302	-0.936737154	-0.932623679	-0.98874429	-1.017258113	-0.974452153	-1.070346989	-0.888833413	-0.984343302
0.036203085	0.050376386	0.134999586	0.290569634	0.423046373	0.364542791	0.490374742	0.497436224	0.506832979	0.633392718	0.79923434	0.728596925	0.899350443	0.982571013	0.941415564	0.945216755	1.033866333	0.875353095	0.707398844	0.715976002	0.625816447	0.489875097	0.540339179	0.499185522	0.453195269	0.330814617	0.328755272	0.241936855	0.126942749	0.027655616	-0.034570535	0.038885014	0.067105449	-0.056456286	-0.079156874	-0.170799385	-0.347778863	-0.305062529	-0.50675057	-0.517186419	-0.531420374	-0.551812917	-0.644392546	-0.696686544	-0.814468678	-0.7870187	-1.022733444	-0.994458179	-0.911826045	-0.931006762
0.011904831	0.26475886	0.328559245	0.310303372	0.468145664	0.589586406	0.600976246	0.749741097	0.692825802	0.742415598	0.940905404	0.86290153	0.860756888	0.992299814	1.059331507	0.989410863	1.07848801	0.965984899	1.024468316	0.832327325	0.832318922	0.783744653	0.845302464	0.753748493	0.953379017	0.63731408	0.440695046	0.397428445	0.33252718	0.108870809	0.085926926	-0.195202565	-0.22892565	-0.077195928	-0.245229087	-0.362213063	-0.456340701	-0.539792824	-0.712844089	-0.72236807	-0.734609624	-0.730237841	-0.983575454	-0.904298901	-0.896122375	-0.925342512	-1.030729818	-0.980306934	-1.10500786	-1.014761299
0.118395586	0.280216735	0.385584707	0.3938851	0.487212758	0.56849627	0.626933774	0.72106232	0.728362712	0.83761459	0.852507326	0.846377537	0.972008281	1.01267715	0.963752875	1.181035556	1.123483584	0.985035717	0.945019806	0.84118989	0.810937361	0.991104549	0.644642328	0.758797724	0.570597285	0.636895843	0.531666834	0.461083539	0.384051971	0.295703897	0.225844375	-0.045599296	-0.095695834	-0.17418374	-0.247672766	-0.425124652	-0.553799961	-0.753882541	-0.619626927	-0.776290973	-0.984491133	-1.013420879	-0.913573108	-0.97062265	-1.069216691	-1.046894135	-1.149484693	-1.099415531	-1.153149643	-1.15793144
0.14044103	0.071130169	0.297215984	0.325311972	0.452804074	0.595983741	0.602057466	0.681149343	0.764365168	0.70405029	1.023860497	0.894721059	0.961080414	0.937063424	0.932271658	1.131202923	1.018519879	1.096008831	0.982252998	0.878729197	0.942531505	0.894582503	0.772171351	0.842370304	0.604275887	0.605314782	0.513005891	0.286573036	0.335057307	0.175419915	0.117518268	-0.067537015	-0.16194116	-0.162481621	-0.304797919	-0.32379407	-0.423415062	-0.523965144	-0.689432475	-0.649307855	-0.718660504	-0.705489034	-0.99401041	-0.925603446	-1.044844396	-0.959402665	-0.890196419	-0.977142019	-1.037736685	-0.980826034
73.90656155	12.20302365	-28.71505649	71.16402012	-34.23023372	-41.4818116	-13.46387415	-33.62462552	-19.30990331	-43.92794555	29.33585387	-50.25937451	-9.128097302	-41.9882642	-50.10564705	57.16489402	-31.6912271	-29.94423007	-24.36548328	-46.67619225	2.338813244	-30.20672572	41.55552975	-18.99226321	12.14304192	-5.98330365	22.66616394	106.5469564	-4.486297874	10.67201161	65.17272155	-39.46659193	27.99992152	67.94329124	66.99283442	-107.4838235	39.49055238	13.33714383	53.77165294	25.49985837	-29.86570637	26.6093504	33.43369251	-38.0692936	73.21847307	-29.06850621	0.475906839	112.7997132	-10.63327306	-45.84818655
-0.028470329	0.258430015	0.373937104	0.345355741	0.540705879	0.601350268	0.576962339	0.639027363	0.706621184	0.825002118	0.87344173	0.820953349	0.947017607	0.96806674	0.899271827	1.021279244	0.954176121	0.876051435	0.895953345	0.917107206	0.801220606	0.841518631	0.758474642	0.665969013	1.054812141	0.491413874	0.519933468	0.348312909	0.238299136	0.269307894	0.18739349	0.097093634	-0.086927334	-0.281763158	-0.3433558	-0.257351888	-0.476795763	-0.594518613	-0.707285346	-0.76813224	-0.835771901	-0.913413525	-0.811257963	-0.883521594	-0.892560894	-1.018913958	-0.959024461	-1.013283105	-1.079969725	-1.065320609
-0.006954878	0.149848433	0.31080091	0.44245666	0.593939793	0.678469319	0.545975332	0.728888328	0.69691735	0.765743557	0.840309452	0.830771636	0.956260222	1.024581061	1.037569695	0.94427759	1.087211188	0.965100688	1.011833759	1.023299886	0.814882789	0.935711059	0.870588073	0.728765835	0.566525226	0.567520438	0.700248512	0.484748449	0.476356456	0.162752321	0.186931513	0.007858997	-0.048115939	-0.183895857	-0.308161097	-0.292771602	-0.588979483	-0.513416904	-0.653914522	-0.694527216	-0.795118277	-0.873194282	-0.970001307	-0.976520669	-1.114793559	-0.981639123	-1.145309842	-1.266334082	-0.994376562	-1.124387104
0.058970415	0.357498578	0.386991489	0.440893207	0.486149658	0.480320572	0.71226991	0.700251636	0.781608405	0.790945275	0.862372318	0.868844896	0.974973689	1.014007189	0.946204774	0.943659007	0.960086681	1.008866132	0.915638693	0.852592613	0.911423398	0.72624715	0.646467481	0.664697573	0.716850814	0.562671494	0.320719651	0.560965652	0.290211334	0.293391622	0.073757351	-0.114682787	-0.041779111	-0.167454427	-0.295048789	-0.414271949	-0.354091456	-0.523118027	-0.612739199	-0.60059672	-0.840760373	-0.89382765	-0.792597988	-0.850013499	-0.920959438	-0.855865462	-0.834129479	-1.071897591	-1.017646994	-0.8902985
0.158861509	0.221669988	0.313615919	0.342557823	0.43758952	0.499585234	0.664817716	0.728801016	0.818469075	0.973464642	0.813195433	1.032001264	0.990066541	1.080786405	1.169058015	0.998414582	0.985369142	1.047409128	0.941254653	1.039065102	0.906322429	0.995845656	0.784259941	0.599724534	0.618151491	0.565913302	0.521389466	0.466513927	0.369166949	0.322997269	0.130107014	0.072677157	-0.150038119	-0.118301818	-0.285354212	-0.249194398	-0.58020432	-0.564886486	-0.6863097	-0.772641602	-0.921985808	-0.829927056	-0.910221017	-1.022759849	-1.180785614	-1.035005723	-1.021498907	-1.092012685	-1.13267762	-1.040472963
0.142554498	0.272015248	0.252616214	0.414227978	0.405278407	0.72381015	0.533317558	0.745482529	0.882527226	0.949434566	0.788755857	0.968306571	0.814148898	1.04490743	1.041270014	1.111927044	1.014584682	1.001636342	1.082487312	0.971450438	0.896889595	0.83566894	0.762225859	0.703691765	0.636389081	0.444322099	0.458541815	0.298989894	0.324802733	0.256361907	0.097273905	-0.070308228	-0.217783974	-0.159475769	-0.346707419	-0.367539906	-0.514379292	-0.557713805	-0.608112541	-0.697634579	-0.835611664	-0.820238514	-0.88175666	-0.974641852	-1.115170344	-0.92772304	-1.127309848	-1.072859425	-1.048688462	-1.055947148
0.065561676	0.081953885	0.30731595	0.321189297	0.526746627	0.659371976	0.602799127	0.543939092	0.863662899	0.940808905	0.87580219	0.886347485	0.8167338	0.975724836	1.013717894	1.055954238	1.102374685	0.959256867	1.06000713	0.883295804	0.941639663	0.801495155	0.723076224	0.625333516	0.80042622	0.580749263	0.524901675	0.417781659	0.282602242	0.223580715	0.1435476	0.15168036	-0.040788909	-0.141859907	-0.312551021	-0.419207231	-0.38582215	-0.444861617	-0.602675779	-0.679866112	-0.813739641	-0.915098248	-0.948036009	-0.866859621	-0.876115917	-1.013458849	-0.953455432	-0.942412666	-1.065985082	-0.9091938
0.122007829	0.157728602	0.250567385	0.340713766	0.522398131	0.580007316	0.638688805	0.715025547	0.831812589	0.797909164	0.83371598	0.910241338	0.900626661	1.014565173	0.951725048	1.084372091	0.981087246	0.960002954	0.930013527	0.976817199	0.927298521	0.832349601	0.7733942	0.679495228	0.644176378	0.542004689	0.421443933	0.488494182	0.280519829	0.124699362	0.155728098	0.022126357	-0.138103491	-0.154695289	-0.295929854	-0.352529417	-0.442412668	-0.623230592	-0.669728648	-0.679997853	-0.703279974	-0.68569714	-0.818298923	-0.95108119	-1.029655618	-0.962093983	-1.007738615	-1.045253558	-0.993948815	-0.999354912
0.11423224	0.241751398	0.444766859	0.42357071	0.615501531	0.520784103	0.756470247	0.670248362	0.844504914	0.870890811	0.763804414	0.754475299	0.865247913	0.917097304	0.96065984	0.857057356	1.032593296	0.850224279	0.926376572	0.984267329	1.062926886	0.793304806	0.974931811	0.831175668	0.625440308	0.713939561	0.527375175	0.263775566	0.165853894	0.306786069	0.015181799	0.078118509	-0.240506951	-0.107580187	-0.315035707	-0.4287687	-0.515402203	-0.401921788	-0.660792426	-0.682205688	-0.781307873	-0.918480541	-1.026723802	-0.937116914	-1.092302335	-1.121959427	-1.152661551	-1.172972546	-1.187280581	-1.160871513
0.277245605	0.123212692	0.161265355	0.370220732	0.462781124	0.474329342	0.548768633	0.885445081	0.738419504	0.913387968	0.962150278	0.810342928	0.991234808	1.008448259	0.84828773	1.114966007	0.939721142	0.969680661	0.900859552	1.002552786	0.897331843	0.72946368	0.723158906	0.669921219	0.488924645	0.667592471	0.438063797	0.364020998	0.283608152	0.17731827	0.209443866	-0.006760179	-0.073897307	-0.217286683	-0.428420261	-0.343947812	-0.43454737	-0.56338458	-0.620201971	-0.679470605	-0.780014698	-0.763902897	-0.791075869	-0.904528359	-0.946559346	-0.814007276	-0.930442869	-1.005742379	-1.031331764	-1.0145343
0.078786757	0.204383027	0.266953219	0.359127577	0.5200099	0.519818776	0.67191793	0.676518937	0.766784662	0.818468944	0.981293068	1.023076033	0.962819701	0.934202455	0.919191323	1.083796827	1.018189778	0.942547087	0.978612559	0.904353222	0.828774359	0.830508184	0.699400881	0.670979636	0.597311001	0.508406794	0.43392388	0.410566788	0.328146349	0.222983268	0.22175123	0.069226464	-0.099707626	-0.1104084	-0.221685002	-0.456830323	-0.476359065	-0.539426708	-0.690523892	-0.719245979	-0.758756001	-0.821694407	-0.851608128	-0.908922376	-0.930423979	-1.026792436	-1.066423873	-1.035405133	-0.970963004	-1.01864328
0.165531363	0.294013014	0.423831083	0.58707308	0.620183577	0.66785552	0.396078172	0.205856485	0.289068944	0.623872525	0.664614001	0.720654353	0.599585146	0.61269643	0.531674045	0.492670752	0.68153571	0.584361674	0.80462003	0.678168548	0.692267762	0.792389373	0.472053738	0.41914522	0.427479642	0.51435848	0.625388697	0.710836294	0.303362241	0.169510935	0.053362583	-0.024156429	-0.045269885	-0.150488617	-0.353033935	-0.680195037	-0.669835409	-0.610172649	-0.344303983	-0.123112749	-0.297468879	-0.566433216	-0.722829153	-0.621326985	-0.571237682	-0.540871808	-0.37008431	-0.358457924	-0.494294075	-0.576779235
0.064378124	0.247117294	0.187408739	0.438148387	0.442729937	0.55845619	0.615463089	0.776976644	0.787088677	0.856849665	0.857130818	0.93700092	0.909664369	1.019910331	0.916225494	0.977839007	0.94832822	0.968281599	0.926462809	0.902532508	0.848666014	0.841064071	0.889352528	0.679255524	0.68205983	0.399891839	0.448730823	0.350613107	0.127678921	0.302305375	0.12927768	0.011641122	-0.017122031	-0.181831065	-0.319349635	-0.418914668	-0.495404825	-0.520045195	-0.713748263	-0.685872067	-0.735821358	-0.871792653	-0.895761707	-0.869228963	-0.970500278	-1.039086989	-0.973370401	-0.957709032	-0.954478196	-1.035983764
0.167140544	0.229181365	0.292321988	0.321122947	0.553577614	0.581792477	0.640027332	0.599036949	0.711861919	0.817336266	0.949138533	0.958558243	0.945208021	1.006560718	1.015351845	1.048182308	0.964837915	1.011556568	1.031431219	0.863321641	0.876586439	0.808269393	0.751554234	0.698219002	0.556215379	0.456921841	0.472171524	0.390008074	0.271753409	0.215144696	0.096728598	0.077883185	-0.123966891	-0.293554558	-0.262437502	-0.431201657	-0.437118627	-0.621032353	-0.654670676	-0.706924261	-0.8081616	-0.765448915	-0.85427319	-0.971459646	-0.941703179	-0.985031583	-1.048412869	-0.956481288	-0.953962647	-1.004858514
0.063899336	0.217137633	0.431174421	0.368448613	0.582148019	0.592657228	0.519219905	0.650686575	0.868326951	0.942197455	0.949416393	0.948917541	0.860547445	1.066556055	1.05846259	0.982876404	1.007601127	0.958909043	1.011076414	0.923104111	0.867944223	0.876693005	0.790042478	0.718199527	1.076847984	0.393800455	0.371220849	0.306629669	0.326466326	0.17308439	0.052452642	-0.008450109	-0.137783927	-0.219101604	-0.307467671	-0.295128519	-0.539808857	-0.420155484	-0.600531527	-0.711990904	-0.757825713	-0.842420836	-0.930708952	-0.964137756	-0.851959812	-0.956368183	-1.106911782	-0.972200733	-1.005490536	-0.974655698
0.065488238	0.179398005	0.230922358	0.364621311	0.322599888	0.57026751	0.622856941	0.750139403	0.816098589	0.838679554	0.887530536	0.845233536	0.958540957	0.928497059	1.042808087	1.038056331	1.054588269	1.049842498	0.987913432	0.932964956	0.869167148	0.760576927	0.797361249	0.741312147	0.700605501	0.471730907	0.46607368	0.422021656	0.203339293	0.176092604	0.145653635	0.004981218	-0.097045811	-0.169970316	-0.282193586	-0.368822374	-0.613800624	-0.465156338	-0.574531384	-0.676602099	-0.695558015	-0.79899368	-0.891684253	-0.842347474	-0.900058837	-1.014935715	-1.096878272	-0.975684921	-0.988522076	-1.04873118
0.210537416	0.383811201	0.578888844	0.584998124	0.686475708	0.53912187	0.567423723	0.456480744	0.718074027	0.896339558	0.746696471	1.046133969	0.945833425	0.910844841	0.931323651	0.928883795	0.919775193	1.023159999	0.996259421	0.884606093	0.910239738	0.756206824	0.750497717	0.524463013	0.559878092	0.563011581	0.573797732	0.65389632	0.475867354	0.498361198	0.159440719	0.010714559	-0.274440412	-0.361237755	-0.770862254	-0.672714474	-0.629770956	-0.453663916	-0.468200273	-0.641224014	-0.621120873	-0.724299904	-0.798408063	-0.852035205	-0.907253436	-0.91293027	-0.965754685	-0.809694139	-0.968954307	-0.954335966
0.021839188	0.180790987	0.349219507	0.446363665	0.528269748	0.502252796	0.321515657	0.090958499	0.089378024	0.316010576	0.29620276	0.306578531	0.10564305	0.038529312	0.201007423	0.24196876	0.164142192	0.109337481	0.133338866	0.276321699	0.358898336	0.238113848	0.113276136	0.126081397	0.315446169	0.532792162	0.603233045	0.518774205	0.401569723	0.275249376	0.049542398	0.032501573	-0.056990688	-0.168019544	-0.350986297	-0.52696519	-0.617428239	-0.55703238	-0.381852592	-0.157458526	-0.105635263	-0.287522434	-0.337997134	-0.314620291	-0.118596448	-0.000149188	-0.212053709	-0.238799799	-0.183079295	-0.06255574
0.152317682	0.206375163	0.258271529	0.316462164	0.45940913	0.476440377	0.681181237	0.738668236	0.765580531	0.756674319	0.868985201	0.992011107	0.832904452	0.879928691	0.960468096	1.032772371	0.971063517	1.071402324	0.878325024	0.993402984	0.916474932	0.810490259	0.684647339	0.780647274	0.479710758	0.515992498	0.488767194	0.302424574	0.323578587	0.19347413	0.111977689	0.074334511	-0.020305351	-0.070455687	-0.293163606	-0.391872685	-0.41931917	-0.587737691	-0.521001211	-0.75683346	-0.779371163	-0.788302899	-0.863254408	-0.953723337	-0.995910668	-0.996446889	-0.920437031	-1.076493867	-1.039812782	-1.114931014
0.140265008	0.325315989	0.144252405	0.373225395	0.4610551	0.410947774	0.582615252	0.659216433	0.860351737	0.873868388	0.813924673	1.09148651	0.949211099	0.978423041	1.087915622	1.114140411	1.041735698	1.041199357	1.060696087	0.998171902	1.036119559	1.037876071	0.849686138	0.646115251	0.743822093	0.648287784	0.47415977	0.360829363	0.43311923	0.293209316	-0.017480486	0.022563712	-0.09031934	-0.247036522	-0.360933292	-0.425735813	-0.397986648	-0.613700154	-0.674067813	-0.84573111	-0.682535596	-0.8113454	-1.005879844	-1.021663041	-0.959485998	-1.102032395	-0.975260546	-1.07917642	-1.14866841	-1.16020261
0.060380695	0.18363114	0.374984044	0.535938886	0.579627503	0.527969909	0.382048186	0.186380292	0.064480438	0.2245861	0.238869933	0.198289871	0.005187689	0.154247339	0.220587927	0.306160717	0.257457908	0.104276007	0.08749011	0.239340947	0.290619271	0.210705826	0.074903707	0.174274153	0.410373098	0.507138094	0.600483462	0.50608603	0.409164293	0.205699057	0.101717746	-0.023660618	-0.055485507	-0.196576542	-0.358673566	-0.469944673	-0.569968111	-0.521563166	-0.41727479	-0.113633466	-0.103742143	-0.248791398	-0.259250968	-0.24953648	-0.065476617	-0.122738989	-0.276139406	-0.312527937	-0.263994727	-0.139561581
-0.068190274	0.146911039	0.300134484	0.472960394	0.37627736	0.430947663	0.437382607	0.698417211	0.82168237	0.786796286	0.861911801	1.069002441	0.918684525	0.968077281	1.031310996	0.866526431	1.076160107	0.984995484	0.963528414	0.909537365	0.899672794	0.776679791	0.82608516	0.62915135	0.169163266	0.522422131	0.249028145	0.379737256	0.258431925	0.182562583	0.120438237	0.038117096	-0.016139235	-0.196429251	-0.355408474	-0.445986946	-0.45790772	-0.418591477	-0.679345187	-0.648392661	-0.863930298	-0.779433237	-0.909657967	-0.958482232	-0.955570237	-1.073975735	-1.157568839	-0.975329577	-0.969149916	-0.983489533
0.136899939	0.180905784	0.126346066	0.399935738	0.420580597	0.728686631	0.579655005	0.674158489	0.793448173	0.866240776	0.897387962	0.912351032	0.981574954	1.043106701	0.97439832	0.946670655	0.934199749	0.903076705	0.872576011	0.894232737	0.852901906	0.783675329	0.875050531	0.687394225	0.833150383	0.524134692	0.568523129	0.249428702	0.492830994	0.188688412	-0.015503333	0.021894055	-0.219747378	-0.213050608	-0.239909295	-0.524972855	-0.384375751	-0.527586995	-0.511579187	-0.687881616	-0.809936561	-1.012838873	-0.830500498	-0.700280973	-1.152546109	-1.091709493	-0.963603376	-0.903831019	-1.135869451	-0.962721043
-0.012299267	0.241704	0.219516911	0.422196343	0.383569355	0.481259095	0.63646663	0.703645187	0.830807121	0.877739503	0.888325304	1.02435583	1.020563929	0.971165712	0.906789764	0.86188033	1.02410861	0.891036421	0.95294053	0.87371129	0.878294613	0.855204633	0.965765518	0.659339794	0.733497491	0.543773846	0.433294657	0.310267078	0.170615724	0.10723664	0.06377179	0.036132402	-0.183919629	-0.109207493	-0.311021984	-0.352717425	-0.402415586	-0.563010927	-0.711085025	-0.835027026	-0.752489283	-0.850689687	-0.845360947	-0.939304868	-0.871417956	-1.084107271	-1.012075757	-1.041744407	-1.033230205	-1.013544063
0.051760507	0.35927262	0.273672047	0.341610219	0.484268776	0.574415648	0.681448226	0.738969359	0.824025267	0.851156124	0.837879739	0.917451973	1.071479178	1.058706048	1.038844894	1.064542307	0.92154614	0.991581263	0.937551766	0.980596156	0.779614301	0.857326078	0.867961869	0.860443505	0.606120868	0.656524783	0.396619207	0.386788976	0.275302981	0.138408861	0.072222485	-0.041721714	-0.074670214	-0.232877547	-0.207712754	-0.321164094	-0.43935537	-0.609006289	-0.554505659	-0.777235059	-0.774125501	-0.939741555	-0.893599889	-0.961521656	-0.880035606	-1.001129628	-1.078706888	-1.139426167	-1.017669625	-1.115193541
0.078914573	0.088855144	0.363451301	0.461037736	0.371603916	0.57331549	0.711105035	0.706493655	0.865090811	0.809609757	1.043553766	0.929418567	0.950099236	0.955816775	0.953234855	1.055016756	0.874000402	0.899338781	0.966718875	1.090176713	0.909413256	0.896938369	0.970972546	0.764749508	0.634765535	0.664523958	0.376986157	0.338073902	0.2622673	0.343020959	0.17822283	-0.082384077	-0.013128113	-0.284228783	-0.330213026	-0.514683117	-0.484070104	-0.522718375	-0.727144083	-0.846099875	-0.644664075	-0.982843761	-1.127828682	-0.856168454	-1.110048469	-1.074009236	-0.977516686	-1.087010071	-1.127423691	-1.331193412
0.116066538	0.131944113	0.295999109	0.372281029	0.407660874	0.495645021	0.612251762	0.791439411	0.693805569	0.768815932	0.960193191	0.918356427	0.864731168	1.063194056	0.924885648	1.08933253	0.953438251	1.030590721	0.832370514	0.956440616	0.861599496	0.797581871	0.774666249	0.672083533	0.524834371	0.664189131	0.430278393	0.463169521	0.256009676	0.230417441	0.169716156	-0.009222402	-0.053981993	-0.194995466	-0.311163438	-0.360383889	-0.4389792	-0.670931484	-0.730954037	-0.724712744	-0.776202317	-0.930591344	-0.684110144	-0.908172353	-1.031113109	-1.111021007	-1.054261008	-0.995124304	-1.06327869	-0.964749041
0.093929341	0.253937866	0.316214069	0.435862597	0.466233232	0.522982624	0.629628565	0.755772444	0.834479097	0.863578654	0.97890248	0.986998569	0.99167701	1.008362311	1.06610894	1.045840514	1.075171718	1.027248806	1.063683382	0.947982855	0.932999858	0.931475502	0.724106642	0.687698737	0.678711636	0.577077647	0.512059941	0.443685834	0.253855127	0.262315638	0.119837547	0.058014298	-0.05900088	-0.11770392	-0.261428543	-0.45817996	-0.543237437	-0.554550808	-0.694086598	-0.741862332	-0.813072986	-0.915689967	-1.044822001	-0.903385626	-1.039130181	-1.159001986	-1.104242114	-1.083649713	-1.107227645	-1.098724477
0.106516842	0.162435889	0.235652884	0.430457628	0.514347296	0.661835578	0.451601135	0.223318643	0.296746289	0.131197932	0.229067808	0.350103303	0.306670071	0.607064296	0.614291995	0.81410017	0.776098393	0.581015287	0.414228864	0.354829411	0.186588227	0.218173036	0.241941978	0.36694067	0.556999951	0.435176745	0.48131044	0.456567339	0.371687276	0.171753958	-0.001326389	-0.005189492	-0.003162125	-0.126628183	-0.277419445	-0.389479506	-0.535493441	-0.584945546	-0.514481893	-0.329007371	-0.255912647	-0.148949783	-0.228088046	-0.242671714	-0.519374038	-0.620144509	-0.768319806	-0.802420641	-0.696802079	-0.580431754
0.039006725	0.180532456	0.350963046	0.377791795	0.510233646	0.574357178	0.694161149	0.562563489	0.626064903	0.776414849	0.803047617	0.938995324	0.981360492	0.883728956	1.068590982	1.141185251	0.965728285	1.056303706	0.914350203	0.888242143	0.854268471	0.880834918	0.737483915	0.643500895	0.353122392	0.518534481	0.427307607	0.372836357	0.210219628	0.071000217	0.018577082	0.006842848	-0.055144472	-0.256097381	-0.264971986	-0.37804594	-0.382645815	-0.629316348	-0.618189188	-0.710476679	-0.824717214	-0.977425378	-0.914777108	-0.985553031	-0.991533869	-0.94298377	-0.932256995	-0.986681812	-0.992173638	-0.967095554
0.36095366	0.458465516	0.676154852	0.663569066	0.652155306	0.551269548	0.652157376	0.769710186	0.751452842	0.764578306	0.802459148	0.921519401	0.904029377	0.759930047	0.874030955	0.816255258	0.990508505	0.917142597	0.924874708	0.99813177	0.855699548	0.847040071	0.830918807	0.535346019	0.647522429	0.653403119	0.671249983	0.708675049	0.592069572	0.518213651	0.19265665	-0.055028616	-0.362451371	-0.388978066	-0.523641703	-0.69008119	-0.679809201	-0.486788079	-0.675111816	-0.625193701	-0.66237158	-0.765048389	-0.859479856	-0.896773649	-0.911016503	-0.961780007	-0.927149389	-0.79891243	-0.822875153	-0.795159189
0.031948587	0.120688538	0.390635093	0.65372637	0.71312271	0.727204237	0.483273585	0.478083863	0.639864738	0.911571215	0.994855528	1.047949632	0.806773037	0.807089633	0.841724406	0.772130221	0.970679993	0.929380654	0.900286292	0.910376494	1.132862904	0.889400262	0.509707353	0.484776933	0.444063573	0.627215623	0.733210761	0.671443986	0.455074993	0.363298618	0.015006975	-0.086210388	-0.099807907	-0.293888839	-0.455651423	-0.587546933	-0.75160795	-0.601478047	-0.570586635	-0.509109213	-0.62489479	-0.817258936	-0.944564907	-0.935952353	-0.957291528	-0.906809141	-0.826290005	-0.924276284	-0.869041274	-0.932161755
0.136644308	0.322713092	0.290778422	0.287453179	0.471052884	0.530137933	0.534105417	0.794170445	0.703851659	0.800708341	0.866216817	0.921198605	0.878535231	1.038703686	0.983871805	1.079116439	1.031601295	0.95085382	0.923769748	0.96247671	0.731941804	0.83018619	0.889711234	0.714493383	0.688510575	0.364356919	0.431773026	0.390637407	0.232228812	0.139603169	0.099625755	0.00773696	-0.10821869	-0.069266248	-0.150195446	-0.443821454	-0.534876465	-0.538474743	-0.552423028	-0.683141608	-0.703113754	-0.794885536	-0.811529129	-0.930162749	-1.045982895	-0.928029999	-1.070034627	-0.942752562	-0.953199881	-0.973074678
0.131866454	0.248511129	0.306789797	0.367217517	0.488897194	0.549042775	0.539529021	0.709181985	0.715017473	0.786834091	0.817958297	0.847709036	1.004725333	1.058339343	1.022710444	0.977214554	1.007230737	0.974358163	0.953917539	0.863649416	0.807061477	0.834493985	0.749504064	0.690333034	0.630694296	0.467299673	0.4456333	0.330961072	0.375005852	0.16949141	0.066912441	0.036733551	-0.042476793	-0.287655511	-0.232110939	-0.351434838	-0.532224176	-0.559567179	-0.64051667	-0.679063254	-0.805203896	-0.906246277	-0.909394652	-0.780352603	-0.990804689	-0.941777023	-0.989229238	-0.958175903	-0.940987555	-0.989247448
0.062224887	0.18074477	0.182514657	0.406248632	0.486875946	0.374652109	0.642212677	0.577613267	0.633560168	0.800787427	1.02847777	0.96442315	0.654935882	0.978933458	0.790608106	0.884692055	1.066797105	0.91695347	1.133282583	0.950697402	0.884274791	0.939058447	0.766000674	0.663351204	0.349172529	0.685792605	0.630128771	0.343484306	0.246998784	0.130147549	0.055652592	-0.069201907	0.134959406	-0.380867024	-0.317808621	-0.226610106	-0.630379468	-0.588427469	-0.557312209	-0.669949749	-0.63169223	-0.722089869	-0.94298928	-0.889447811	-0.992687935	-1.139383873	-1.000715705	-0.875553248	-0.99016878	-1.040742685
-12.53325697	-1.027607073	6.809525763	-28.08126641	30.30256999	-4.634553373	-17.27021566	-12.64386089	-18.95422033	38.90042796	16.32876369	-8.151320396	1.978112392	10.5999607	28.99761243	-11.44565264	21.37528558	21.61475296	15.64755436	-15.54444512	-13.96896359	-22.53957932	-8.475824576	6.665860912	-0.485801991	-13.85693734	-11.40368716	29.14466545	-35.21135644	-12.95238816	-28.85898584	32.30793094	36.78775965	20.50105487	-33.04232126	-19.6212107	19.1518487	-15.9662522	-19.45812366	15.54206816	-33.67585343	-24.04624401	-25.72363781	-29.3543863	5.184323219	8.742273929	8.255398161	16.06676183	-43.16099884	30.30691858
0.201039776	0.45996944	0.505966559	0.633152847	0.848867835	0.674012136	0.698315891	0.642449722	0.629992676	0.757132116	0.723340313	0.730931514	0.832058204	0.930345771	0.944980149	1.060470137	0.941110456	1.127637852	0.875798524	0.808915317	0.797858288	0.751378961	0.637317331	0.599459794	0.878175982	0.71554784	0.733287629	0.760749563	0.649689048	0.398544361	0.226272985	-0.046047364	-0.214057446	-0.537597191	-0.490449559	-0.645372475	-0.866506817	-0.67042839	-0.701953488	-0.60812331	-0.623314123	-0.565389032	-0.653653315	-0.723975366	-0.860033499	-0.805025794	-1.070453035	-0.894526034	-0.922917231	-0.869392069
-0.010764256	0.219646977	0.324513245	0.473483064	0.540687599	0.522593704	0.297991707	0.148707618	0.037737522	0.153657306	0.257768196	0.20027408	0.131304338	0.060717618	0.266732361	0.253406292	0.217528569	0.131136767	0.109847041	0.179806272	0.318280189	0.305823534	0.007167749	0.183937227	0.367358258	0.530596697	0.630970318	0.523846212	0.387894021	0.217122602	0.068314251	-0.015274559	-0.105791812	-0.129442591	-0.385734099	-0.509059832	-0.611464609	-0.554069218	-0.423885099	-0.146599308	-0.096918876	-0.253377799	-0.280864689	-0.254660305	-0.106309893	-0.026801801	-0.147557411	-0.227897082	-0.216613274	-0.096286025
0.046961332	0.110172426	0.334718265	0.555129414	0.613682677	0.524963705	0.42231296	0.305585169	0.133098102	0.073675862	0.149720502	-0.000620383	0.110884632	0.368984596	0.443744797	0.504155107	0.365821372	0.249503843	0.182621255	-0.044702713	0.094862522	0.047374202	0.102714532	0.350276504	0.418831489	0.522520055	0.565857254	0.569578635	0.321125107	0.137148171	0.105262071	0.034193407	-0.121940901	-0.142411056	-0.279218214	-0.466903406	-0.559194367	-0.530937365	-0.46137349	-0.221509031	-0.033126234	-0.024579542	-0.100576431	0.001066672	-0.217339299	-0.35499824	-0.507361677	-0.52797953	-0.447088507	-0.283100725
0.289285282	0.157332965	0.31914554	0.486916771	0.417868451	0.570899738	0.604444789	0.820179398	0.712958728	0.887187411	0.91892251	1.093699854	0.98337032	0.973178972	1.094350281	0.991008587	1.165302533	1.035384136	1.071658604	0.902939946	0.898063194	0.825201484	0.772709732	0.836924124	0.627992993	0.507639345	0.41120078	0.433818465	0.353857384	0.196770977	0.045062928	0.055088222	-0.094749065	-0.224145501	-0.235513569	-0.295361236	-0.558569553	-0.667663772	-0.736367928	-0.749679956	-0.872901189	-0.803887011	-1.013857512	-1.006446665	-0.998058511	-1.009977426	-1.120535239	-1.076045237	-1.186909276	-1.140023467
0.243412871	0.363954748	0.387239042	0.444709207	0.579567615	0.737999277	0.574685662	0.672939337	0.689262111	0.882868607	0.700545253	0.811521598	0.987228916	1.010477142	1.068088632	1.005094373	0.896315304	0.951296676	0.958922567	0.920809238	0.747828568	0.729263551	0.686882186	0.618152311	0.724213962	0.728008134	0.604285346	0.662397865	0.511188222	0.431478919	0.322765574	-0.121208502	-0.22502294	-0.321799678	-0.452049299	-0.573471885	-0.687665828	-0.69777334	-0.679295352	-0.694158896	-0.708572344	-0.766293142	-0.747820963	-0.812116302	-0.803507622	-0.820213063	-0.884948082	-0.888361818	-0.829263532	-0.902234211
0.02118259	0.186281473	0.269352973	0.403746143	0.529565646	0.50309458	0.532410527	0.632683427	0.775870858	0.814361055	0.913627676	0.955900683	0.930674598	0.952468134	0.996435487	0.961616524	1.082549745	0.959960627	0.896033928	1.047866517	0.948465628	0.861603025	0.748429814	0.671904157	0.520481336	0.479721303	0.507822169	0.46110897	0.233253804	0.25328518	0.161329018	-0.015327571	-0.12953087	-0.248280233	-0.30189343	-0.378738572	-0.592524358	-0.682335038	-0.627402348	-0.611886875	-0.77026498	-0.744121625	-0.791196444	-0.827059348	-1.003178149	-0.976913686	-0.807725715	-0.98107637	-1.063490193	-0.915945167
0.134173602	0.052035406	0.367207569	0.550200933	0.577082738	0.515451687	0.346632916	0.211247367	0.366365699	0.454801409	0.578391369	0.765327707	0.757481081	0.441751952	0.40787877	0.519977508	0.38351074	0.405267631	0.636435328	0.600347171	0.719267701	0.526213155	0.271301547	0.33411396	0.354919562	0.631192068	0.526523394	0.52881642	0.318781983	0.193962284	0.085845699	-0.035228405	-0.156881044	-0.200920179	-0.326622187	-0.40214374	-0.593405925	-0.553656103	-0.438229639	-0.304975622	-0.373339632	-0.623664977	-0.761081306	-0.581629651	-0.509795066	-0.526296294	-0.45671834	-0.521792939	-0.443009587	-0.561060873
0.198945729	0.278331805	0.229336221	0.266262751	0.575726826	0.652513095	0.632595344	0.670755008	0.648415574	0.766442423	0.787623512	0.886249216	0.884826935	0.95991261	0.876576057	1.017350323	1.197594253	1.111473904	0.793716886	0.998700145	0.874183251	0.780945815	0.673050064	0.678902998	0.521573847	0.552427464	0.458012556	0.300149912	0.315746648	0.259545174	0.108043656	0.131510369	0.004977762	-0.178484815	-0.302677123	-0.347862003	-0.540436631	-0.58340877	-0.554513485	-0.583856164	-0.896910494	-0.769141083	-0.8464955	-0.882004925	-0.951521235	-0.984412813	-0.998451372	-1.031963348	-1.154732728	-0.997411892
0.299083784	0.380256522	0.273743339	0.532351433	0.253255553	0.727230437	0.5422642	0.707822403	0.772115408	0.806150131	1.003986793	0.812672746	1.08160416	1.06288419	0.983331983	1.021187316	1.019712754	1.086186949	1.071992857	1.034832246	1.015010966	0.908002681	0.648555162	0.660323705	0.822129747	0.178071812	0.426322195	0.570238763	0.305161172	0.232313157	0.261390718	0.080143335	-0.101152353	-0.386034818	-0.21226948	-0.199430677	-0.238282929	-0.604530387	-0.552580441	-0.917925617	-1.157716847	-0.927802259	-0.888887229	-1.416232837	-0.869270137	-1.185127331	-0.913016121	-0.968850469	-1.129774737	-1.138175827
24.16951545	-15.95440571	20.81222894	-1.319028304	-18.66859789	74.55773553	19.3810349	71.09951555	-20.74282552	-51.24800732	24.86770396	-42.95917887	32.74127646	12.93557952	-22.08841192	54.11814323	-21.456014	-35.82880161	31.75584629	-42.85507626	54.77004743	47.77412674	-2.395165125	35.00869155	30.28038169	-31.70427668	4.460405002	-9.572208207	15.98896441	3.589874611	-23.29028215	38.88990892	25.31330546	23.21811973	-52.83192681	14.93858295	0.140490948	-62.78415599	-24.14628122	44.48986922	38.70366882	49.34253361	-28.08166111	-47.80214529	-67.2915629	35.97362458	-36.19375293	72.57566279	-27.82624221	-7.078276943
0.230277758	0.385573146	0.471217211	0.547600234	0.669585283	0.669097835	0.678919749	0.779100183	0.700412342	0.669477903	0.695514388	0.865272719	0.883004095	0.863111706	1.050123787	1.018487388	1.015126365	0.885511329	0.968308497	0.919134303	0.879439703	0.803686074	0.661720832	0.726013768	0.649139229	0.61244663	0.654957994	0.650375599	0.402801054	0.230089551	0.168889057	-0.036830304	-0.193911251	-0.249113909	-0.527166244	-0.500737938	-0.62455718	-0.692118936	-0.639592924	-0.789344705	-0.651930254	-0.786394354	-0.585343283	-0.779622165	-0.84518775	-0.828444484	-0.736227087	-1.030347212	-0.953283568	-0.796712415
0.251590061	0.422481956	0.631537751	0.744084132	0.737970317	0.737027363	0.817794475	0.636199823	0.572649795	0.636495691	0.757041559	0.798401907	0.96263513	0.87403331	0.801592032	1.046979481	0.895884717	0.832360536	0.94711039	0.730144529	0.813599032	0.729001298	0.728790085	0.73316866	0.73756514	0.669957394	0.855255924	0.76114371	0.56806367	0.456411996	0.205142777	-0.086996027	-0.266381571	-0.526972425	-0.540435483	-0.65392526	-0.917092061	-0.708220511	-0.735829618	-0.610288802	-0.606728245	-0.68874279	-0.756390769	-0.736765494	-0.702084136	-0.896370634	-0.942070262	-0.843777971	-0.861800821	-0.862808935
0.068731838	0.262697529	0.254705878	0.420090043	0.481867253	0.507715083	0.540418625	0.669881648	0.750863746	0.796979867	0.879699905	1.060957306	1.035846179	1.002577811	0.953040556	0.880457688	1.007674438	1.044392259	0.972845767	0.864151413	0.889366908	0.858097197	0.793910251	0.64440135	1.074831676	0.552216082	0.562507992	0.322940908	0.282241336	0.202155226	-0.016993196	-0.195237744	-0.082233287	-0.044242577	-0.376880788	-0.46279693	-0.367325852	-0.550476821	-0.697621087	-0.583660977	-0.666626054	-0.773286117	-0.951838651	-0.960734075	-1.027233407	-0.962103728	-1.074031695	-0.955388316	-0.947384673	-1.070117659
0.085868066	0.299347003	0.210089314	0.417996531	0.424763777	0.567191272	0.598752566	0.765851643	0.786890581	0.742511781	0.926316129	0.843902458	1.044729584	1.171428558	1.1470101	0.90749392	0.906120174	0.905246825	0.951198816	1.005866097	0.940246449	0.796115946	0.831800721	0.828036354	0.259354619	0.527905185	0.582289189	0.334856949	0.234341085	0.10713153	0.089931953	0.031350533	-0.167885441	-0.142081449	-0.26168448	-0.393778894	-0.362207658	-0.494264089	-0.497233631	-0.676267011	-0.746688102	-0.727874017	-0.847857661	-0.855032026	-0.988834504	-0.896152919	-1.038347632	-0.937794646	-1.025907519	-0.871001073
0.057391464	0.286420937	0.240452412	0.383524765	0.587254775	0.47601587	0.531826091	0.676337852	0.854086695	0.85980266	0.85254557	1.001253643	1.014598153	0.902779161	1.151251809	1.035064397	1.034650756	1.120384154	0.908499709	0.899247968	0.873686657	0.878237843	0.866226383	0.675526942	0.351406857	0.444342294	0.375836428	0.370014078	0.216447666	0.111469368	0.050862072	-0.065918162	-0.11696186	-0.12388749	-0.311615651	-0.250565983	-0.521693702	-0.495517976	-0.542030404	-0.701955525	-0.834673904	-0.860985645	-0.850763646	-0.986015138	-0.892795576	-1.025655438	-0.971878589	-1.029149594	-0.979275671	-0.981032677
-0.001375532	0.074739681	0.432854838	0.258461363	0.400871873	0.675316367	0.732660829	0.843150286	0.667593843	0.727946518	0.770194791	0.957902057	0.877860047	1.134603806	1.046022045	1.005289221	0.974068781	0.873375298	1.131635292	0.816034666	0.928176723	0.736640744	0.754780557	0.574770897	0.643486873	0.718705808	0.410329452	0.313583002	0.316094418	0.30537516	0.032960154	0.155045906	-0.172036664	-0.116076625	-0.302738021	-0.369514376	-0.442460073	-0.574789547	-0.675370685	-0.701786504	-0.759503854	-0.837676216	-0.921040139	-0.926983144	-1.027943252	-0.989001821	-0.949661172	-0.910029081	-1.003894922	-0.955224127
0.12933312	0.181117152	0.218775591	0.328341772	0.667821793	0.633735059	0.69597933	0.759330684	0.795265066	0.848732291	0.966499352	0.764365659	0.930576407	1.037953702	1.044167842	1.050643307	1.147960601	1.06607739	0.921472162	0.966187291	1.048142285	0.793515052	0.854728426	0.659783097	1.04012225	0.698274994	0.469838121	0.344885941	0.238547194	0.127418147	0.07629871	0.060196793	-0.027969812	-0.266174292	-0.418933292	-0.298675395	-0.524541124	-0.595725383	-0.55190491	-0.634409466	-0.822993408	-0.87882457	-0.89798146	-1.0119328	-0.929834447	-0.917016976	-0.909829302	-0.947803733	-0.985292721	-1.090174896
0.133276301	0.210515066	0.290669666	0.480168869	0.447674058	0.618366151	0.552233707	0.672446722	0.764703796	0.693308751	0.79182232	0.916904329	0.975946769	1.06564292	1.057866638	0.986242565	0.911869957	1.014933805	1.063842891	0.911050656	1.036713267	0.745673079	0.740845429	0.671313816	0.571589295	0.507100201	0.461599128	0.413910701	0.335703274	0.181356589	0.105570161	0.062150366	-0.113622057	-0.109696291	-0.337756571	-0.364549179	-0.475399819	-0.495465721	-0.570213028	-0.667155798	-0.853803756	-0.822241606	-0.780436939	-0.97480508	-0.958141033	-0.97037497	-1.049117302	-0.956776464	-1.023236479	-0.885454437
0.144541133	0.388461728	0.554657299	0.541178469	0.727103966	0.820485955	0.701844216	0.658836081	0.722559913	0.617836406	0.668814129	0.845888161	0.828552961	0.9782926	0.952048562	1.058609881	0.995013868	0.866102538	0.800191783	0.831219203	0.818578824	0.651726656	0.687627203	0.543920093	0.691258074	0.817171417	0.676219571	0.630988889	0.650214049	0.42775992	0.389505606	0.027524041	-0.209307888	-0.321119268	-0.565649497	-0.675529494	-0.617908028	-0.560280277	-0.616579165	-0.801840556	-0.692214839	-0.723908538	-0.676679562	-0.693377644	-0.710063676	-0.793058916	-0.921272379	-0.84709654	-0.786420794	-0.738541077
0.103272209	0.24548962	0.304002095	0.362464287	0.468573217	0.561011143	0.65710914	0.715631372	0.764099233	0.853506169	0.851997903	0.978770484	0.978905244	0.987946686	0.98291875	0.98719211	0.978130237	0.952282107	0.841144323	0.911577323	0.898684237	0.949734458	0.727053458	0.864565183	0.277779941	0.56067388	0.556032921	0.489454149	0.200253904	0.216290792	0.093966424	-0.030263842	-0.118411655	-0.067669514	-0.355631936	-0.49731121	-0.438480505	-0.611348254	-0.668244436	-0.812605756	-0.788521135	-0.887158018	-0.789767578	-0.866873818	-0.942506486	-1.122037466	-1.087465841	-1.007170112	-1.004033212	-0.770055935
0.275684566	0.274086948	0.368644439	0.367636664	0.47234684	0.490223535	0.610290409	0.588104123	0.715556429	0.823184037	0.862094535	0.949194936	0.898269719	1.02669035	1.032623537	1.151155598	0.970017747	0.964320745	1.003366165	0.952591063	0.757305863	0.814173174	0.807348782	0.749544547	0.366423209	0.390210383	0.586881339	0.418091038	0.27307652	0.187283709	0.180104404	-0.101552824	0.047913878	-0.193999209	-0.126531313	-0.299579828	-0.435001615	-0.453432661	-0.664315329	-0.754569702	-0.818597725	-0.872151348	-0.852600842	-1.003343245	-0.978300373	-0.872188802	-1.009738628	-1.179583244	-0.965694683	-1.020211406
5.882726055	-4.38774131	7.87378005	4.714615625	0.882133886	-0.570819137	-9.250823609	3.515851394	-1.734313367	4.856143969	-5.393542343	7.810681929	12.33028409	-23.50378389	-12.06909271	-15.26538549	-17.00809178	-13.36637689	-1.28348131	-18.56482804	6.871019996	14.61792974	-1.766189936	-11.67337176	-8.148967529	18.97370957	-21.83358338	-6.863871243	-5.08617212	-5.824874454	-0.435037116	19.16312004	-5.213800695	-7.974977615	7.884743922	2.849467558	4.870539602	-9.683038143	-0.072352514	7.447205407	-3.778014472	8.607221441	-9.226017998	11.30060747	8.37552937	2.553750319	-22.55003414	-1.927751437	-15.35758252	-0.610024699
0.075298278	0.26610924	0.241146583	0.400491074	0.464694751	0.564074942	0.521972712	0.780391037	0.864093901	0.889276019	0.943859951	0.998063256	1.019212961	1.03423377	0.948262986	1.06215711	0.988085796	1.074782912	1.076966458	1.038114391	0.909788715	0.895695537	0.848827158	0.739950856	0.652891792	0.602132831	0.382325355	0.351217395	0.338413477	0.263612426	0.139946247	0.004630506	-0.016972228	-0.280534242	-0.343186582	-0.280513178	-0.544482507	-0.612547586	-0.635425061	-0.661676648	-0.773064528	-0.845051067	-0.879404534	-0.917488377	-1.035392336	-1.155885435	-1.046792138	-1.093238652	-1.053834248	-1.15292754
0.153339502	0.279832646	0.415581506	0.502549704	0.57554023	0.596531245	0.663078314	0.574825067	0.724126934	0.729664091	1.011316627	0.901733327	1.025766603	1.031225686	0.886960057	0.956163347	0.874662588	0.943374511	0.980232319	0.92527656	0.752541013	0.867980294	0.764268485	0.573917553	0.600338719	0.520020897	0.598807172	0.55658325	0.528597437	0.333159788	0.164988639	0.040527583	-0.251878513	-0.412164726	-0.438894541	-0.648179112	-0.596991166	-0.524044206	-0.636671376	-0.6388555	-0.603515535	-0.804979557	-0.80842813	-0.994390569	-0.973260708	-0.885731744	-0.970856031	-0.889199405	-0.907476895	-0.969534514
0.144531023	0.065325745	0.296380251	0.403367889	0.555030463	0.593897733	0.636857084	0.728442681	0.680819402	0.746609495	0.924944816	0.900930134	0.939859108	0.933288802	0.928541375	0.934546043	0.86720748	1.013375051	1.013695451	0.989188144	1.055432057	0.855781003	0.811289048	0.593744337	0.499603076	0.51742051	0.594835484	0.494666917	0.405722659	0.172014246	-0.010397694	-0.029581268	-0.02620335	-0.238812246	-0.240584355	-0.409859029	-0.48506121	-0.425540431	-0.533002282	-0.636683302	-0.766249787	-0.754158325	-0.968985637	-0.927341921	-0.96242707	-0.989306356	-1.066092858	-1.030309598	-1.021660559	-0.972077451
0.036419189	0.094189749	0.369394667	0.499385044	0.383805864	0.47593325	0.671020198	0.76841604	0.759270638	0.764617613	0.958581207	1.045428308	0.888961189	0.919297059	0.985163423	0.923465115	1.109299228	1.012118379	1.070445472	0.918917619	0.992923646	0.828357648	0.832305623	0.657645739	0.645066069	0.617150573	0.333895369	0.428087967	0.240158452	0.291116273	0.020725764	-0.07816594	-0.051548069	-0.068150486	-0.228317734	-0.284010452	-0.582538691	-0.470833139	-0.672853555	-0.755990186	-0.802130459	-1.00371868	-0.984699909	-0.972354154	-0.988698835	-0.970099727	-0.985312332	-0.970157407	-1.076617836	-0.987539456
0.070048151	0.14465811	0.35011162	0.513183554	0.61778272	0.583460524	0.455253326	0.2315403	0.057715158	0.11168749	0.088363379	0.023190106	0.12923876	0.308815302	0.435905807	0.471936528	0.429165038	0.250517415	0.17095367	0.009642817	0.102692804	0.072220351	0.04886761	0.211260448	0.370788854	0.54805326	0.576064641	0.511328992	0.357512255	0.230365822	0.049306946	0.00775575	-0.053060681	-0.151366009	-0.368425752	-0.452590185	-0.624806009	-0.542126209	-0.408250391	-0.260752525	-0.005702209	-0.056186272	-0.112990068	-0.015609479	-0.057467308	-0.261833871	-0.388005053	-0.504355746	-0.43023365	-0.315666057
0.04186225	0.24916203	0.46840387	0.706965696	0.850973462	0.657826447	0.514482922	0.5685062	0.598859868	0.921842912	0.999150931	1.117205515	0.988705615	0.905068551	0.940640662	0.98843266	0.990685324	0.859153507	0.960665683	1.125140235	1.056235557	0.838006226	0.688493513	0.430141259	0.492975745	0.608871911	0.716666266	0.601986621	0.441539989	0.211112757	0.11377909	0.036818616	0.037125688	-0.249002412	-0.574471943	-0.700422076	-0.7891868	-0.63862835	-0.543207292	-0.46605263	-0.588402253	-0.919164195	-0.958999555	-1.074215729	-0.841150034	-0.892198555	-0.884897303	-1.00563484	-0.841647396	-0.947054402
0.043496887	0.110568283	0.356958168	0.345843768	0.483315384	0.545623956	0.656980382	0.835395441	0.827547718	0.687461125	0.951913502	0.972251078	0.956155492	0.882649408	1.208484923	0.973870789	1.054682603	1.045013726	0.992470051	0.972742114	0.937689273	0.781836609	0.872189756	0.91996067	0.670736619	0.611217906	0.424547854	0.398589405	0.29654243	0.359704664	0.087978795	0.024623427	-0.1877439	-0.138285285	-0.344717167	-0.327915438	-0.617510996	-0.570561829	-0.681847322	-0.674194572	-0.788710313	-0.914677631	-0.859066312	-1.019273113	-1.019859235	-1.076967908	-0.898201773	-0.969051168	-0.896351768	-1.081677782
0.164274753	0.273054021	0.316741537	0.420996415	0.453340736	0.507788963	0.60149374	0.606395215	0.737920359	0.881226889	0.892931587	0.903639309	0.999151397	1.025663049	1.075419443	0.993663034	0.969656797	0.899911995	0.884563985	0.913471557	0.731467523	0.889442791	0.709164578	0.712893034	0.346399177	0.614661019	0.524320776	0.39153582	0.276684244	0.172043737	0.114873396	0.115020425	-0.096573123	-0.272133668	-0.266020614	-0.430436068	-0.605965963	-0.603089102	-0.719964121	-0.613925429	-0.844923997	-1.049166197	-0.815123072	-0.985303203	-0.850727741	-0.965083673	-0.966360956	-1.040890441	-1.006862835	-1.019687088
-0.028327175	0.234131407	0.30628796	0.389495689	0.603400946	0.492908197	0.651023352	0.842580877	0.734866119	0.857857338	0.8714066	0.906137435	0.967152886	1.00701208	0.980313071	0.929825805	0.940213634	0.884048314	0.959644608	0.866445597	0.900043754	0.798838368	0.760777223	0.675080498	1.131336959	0.678225992	0.552781732	0.435302268	0.353346792	0.241410938	0.200594678	-0.007860918	-0.09920724	-0.138810623	-0.33720292	-0.362730715	-0.534090373	-0.649655958	-0.688857324	-0.592576605	-0.700222681	-0.879289212	-0.846391889	-0.81739525	-1.071219842	-1.012911794	-0.98331658	-1.028597193	-0.931825435	-1.069604716
0.109427682	0.374678474	0.366194416	0.488327873	0.562804043	0.601688118	0.704479039	0.598660492	0.753712281	0.888978887	0.860952851	0.909901025	1.047848698	1.00688438	0.971522271	1.063354362	1.174546268	1.007027023	0.885771326	0.893753277	0.829010501	0.902503961	0.772352923	0.74406732	0.581925507	0.509942112	0.592760695	0.531340689	0.251811779	0.281640356	-0.031131358	0.100766552	-0.140575588	-0.237648695	-0.313473248	-0.513459398	-0.454869909	-0.587994439	-0.597697166	-0.71129852	-0.759958166	-0.770478115	-0.95399361	-0.883235504	-0.977043815	-0.963679851	-0.912632882	-0.959474245	-0.945996902	-0.867431999
0.033987645	0.245560802	0.454805691	0.528586769	0.613618622	0.43915392	0.239209013	0.072821611	0.237549052	0.46843919	0.414618063	0.596105265	0.426593453	0.228165719	0.2079815	0.171857847	0.254273315	0.205834206	0.448260256	0.440134582	0.631627837	0.591018274	0.258972965	0.052646433	0.290735188	0.442627651	0.535635191	0.444766874	0.314979245	0.281644642	0.006375093	0.02852714	-0.040237376	-0.179226867	-0.428490623	-0.458798944	-0.618106201	-0.421367391	-0.297473354	-0.176352967	-0.340230701	-0.508811235	-0.54592981	-0.5629908	-0.33235264	-0.207116385	-0.278683283	-0.163472621	-0.141375825	-0.310979437
0.080434937	0.194732351	0.280955833	0.400652318	0.410899042	0.579898885	0.742884872	0.790810117	0.767875233	0.925175515	0.94874609	0.911742377	1.036208965	0.876671334	0.86509005	0.911150374	0.918704911	0.861688558	0.878319651	0.922087536	1.009178779	0.841781849	0.829670743	0.685606423	0.593210285	0.611849319	0.480724718	0.388878264	0.310877246	0.113287673	0.131452983	0.034007699	-0.058066044	-0.202971145	-0.262613832	-0.4318464	-0.486049237	-0.49876606	-0.636155169	-0.689295572	-0.792829521	-0.818080686	-0.814435042	-0.97741036	-0.81414883	-1.036731165	-0.956519608	-1.10641893	-0.949889958	-0.98659642
0.123631541	0.164787907	0.223128475	0.399836592	0.542914154	0.549917853	0.69519571	0.800519918	0.775424992	0.849111979	0.785411044	0.945146801	0.996718263	1.0116367	1.086888493	0.903963288	0.996486315	0.9741816	1.139618783	0.939997154	0.889438597	0.895722739	0.960264712	0.66515451	0.089894694	0.59130116	0.546279437	0.391318043	0.356993966	0.271087048	0.086362591	-0.023775502	-0.034425935	-0.238612237	-0.254969101	-0.361988082	-0.497438826	-0.502421003	-0.560165851	-0.562039528	-0.799500134	-0.804851277	-0.889435319	-0.972217269	-0.843453398	-0.929312307	-0.987897269	-0.966813438	-1.094464717	-1.022952242
0.121986133	0.230333527	0.222523153	0.37792635	0.460777193	0.618447573	0.751102678	0.822249073	0.742095909	0.751636867	0.943596686	0.900512696	0.860530339	0.918532527	0.996589779	1.085486702	0.958056812	1.023931771	0.964180026	0.880220793	0.996225703	0.934406364	0.841951912	0.780781976	1.158998098	0.596585189	0.463834642	0.296778489	0.295519953	0.276168361	0.078790926	-0.020298238	0.040757204	-0.14353153	-0.312810673	-0.476852214	-0.454295641	-0.444353602	-0.647283629	-0.732224762	-0.917609578	-0.840080647	-0.789230722	-0.853628064	-0.938356689	-1.033619346	-0.907763424	-0.915093096	-0.992699757	-1.048634431
0.064039204	0.167549367	0.361063827	0.270164464	0.588015308	0.523048319	0.662878322	0.699091696	0.828006232	0.86402699	0.754935337	0.950914809	0.958169916	0.989588439	0.999774611	0.96725044	0.939018935	0.99737277	1.001013934	0.947852822	1.054582505	0.755807378	0.857161717	0.796013768	0.596987538	0.584619121	0.463587768	0.534545636	0.224422126	0.291518704	0.130743005	0.03867289	0.069287672	-0.109707811	-0.278982183	-0.326590415	-0.47961444	-0.570589341	-0.651419136	-0.547268051	-0.795919195	-0.837954166	-0.800082503	-0.861211376	-0.875709524	-0.93330875	-1.068236474	-1.034637997	-1.139136487	-0.963914125
0.025817038	0.312268846	0.478247452	0.595420363	0.683360152	0.765823508	0.572265342	0.466466271	0.620877415	0.866776037	0.880480957	0.996074445	0.934528024	0.945620874	0.906321841	0.853050672	0.920069575	0.864445535	1.035447235	1.070634529	1.039630312	0.929129485	0.65270875	0.49731824	0.445778649	0.634008684	0.830747272	0.649618384	0.496036735	0.308813316	0.11050044	0.023643997	-0.104095423	-0.204868499	-0.547680184	-0.708477804	-0.720990258	-0.57824878	-0.487261829	-0.500527666	-0.606063509	-0.8975984	-1.058482872	-0.964991982	-0.926386812	-0.908417437	-0.817792286	-0.96974629	-0.942711833	-0.955710188
0.097997938	0.152846082	0.280287375	0.357426488	0.501490351	0.593096009	0.600875259	0.711760949	0.751377457	0.827703414	0.938297743	0.947751776	0.990228565	1.029642063	0.905520743	1.002429105	0.881511411	1.008910876	0.923574006	1.022085972	0.777080396	0.909498822	0.802687258	0.681661149	0.700344663	0.480204001	0.46666809	0.311783381	0.383929161	0.102063433	0.038687394	-0.040314235	-0.170626156	-0.206859107	-0.314885052	-0.41132366	-0.47185162	-0.633872508	-0.649807445	-0.744552593	-0.768739917	-0.752025745	-0.872955777	-1.015676089	-0.953677284	-0.899352479	-1.029916989	-0.955406251	-1.018538048	-1.020811573
0.142287749	0.051443066	0.181606912	0.506071455	0.434181172	0.559085399	0.709904063	0.655753387	0.834768547	0.941013508	0.819377738	0.957281014	1.145392775	0.963136143	1.075534336	1.057119018	1.14588529	1.106417417	1.044344171	0.906962646	1.022351133	0.935849894	0.794518959	0.815416569	0.535588736	0.555468338	0.555939767	0.441861042	0.225251216	0.350267743	0.016518585	0.056432995	-0.102732879	0.093718498	-0.349251164	-0.469361708	-0.442769509	-0.56785699	-0.819036541	-0.745556652	-0.722286971	-0.974092326	-0.943647531	-1.162632454	-0.902954142	-1.167915315	-1.040623076	-0.9425913	-1.1640963	-1.024676067
0.092975205	0.333266288	0.417679294	0.459692149	0.489540466	0.581471118	0.648455911	0.629641528	0.673800492	0.679260122	0.869952162	0.876539497	0.96432868	0.959002535	0.916193002	0.967808715	1.012501331	0.977853243	0.854224713	0.995487659	0.895257204	0.721158172	0.76606096	0.698757956	0.585158426	0.674053793	0.553110565	0.540928242	0.416222472	0.252811556	0.14412102	0.074506468	-0.094807965	-0.296392419	-0.506193913	-0.536169293	-0.552834642	-0.481360732	-0.508297657	-0.611312	-0.618573582	-0.828704731	-0.917106936	-0.955759232	-1.0235204	-0.893917565	-1.022181929	-0.969090611	-0.916104416	-0.928104805
0.092932546	0.110275884	0.345332679	0.290991597	0.395069188	0.511969477	0.581683366	0.79074784	0.778304653	0.861967817	0.75366908	0.949213148	1.141754196	0.903452551	0.935048912	1.03162848	0.95858577	0.973554607	0.926894328	0.972927884	0.813608666	0.901003098	0.676986832	0.70060881	0.47351132	0.491246787	0.400488959	0.465734507	0.354330071	0.226208208	0.114230944	-0.09244589	0.032519549	-0.244753577	-0.23452009	-0.463373617	-0.400493718	-0.660322158	-0.573337192	-0.680831065	-0.729081606	-0.868586311	-0.813520456	-0.810859377	-0.950723608	-1.109334435	-0.86646729	-1.037440603	-0.892795897	-0.959699557
0.122761315	0.194830956	0.296127247	0.375437071	0.395845435	0.539114279	0.592690283	0.701496201	0.759713526	0.807023672	0.877921971	0.891622481	1.01909749	1.007449078	1.022602411	0.937342229	1.028907008	0.958972921	1.004668291	0.908531513	0.811330481	0.749549808	0.733463687	0.742633957	0.58960354	0.583329658	0.468462308	0.437667709	0.267476286	0.223248543	0.123635766	-0.01691907	-0.005415592	-0.211814513	-0.370059635	-0.434805948	-0.423531333	-0.622797005	-0.596603021	-0.750996278	-0.778352632	-0.825359017	-0.890374403	-1.075362451	-0.921669657	-0.960427443	-0.958655754	-1.066262867	-1.005291408	-0.914387487
0.089008465	0.195874942	0.168903795	0.325640996	0.309913806	0.635203229	0.635353971	0.654909365	0.78003644	0.808148891	1.028081206	1.004397496	0.825700568	1.066764384	1.079760099	0.929830963	0.917697354	0.988042679	0.797680244	0.966580602	0.935127434	0.728195436	0.798951981	0.70394126	0.757465996	0.515322046	0.452950593	0.333658917	0.403523034	0.240211448	0.096173896	0.185120487	-0.143919959	-0.104690576	-0.340999114	-0.269310623	-0.339911824	-0.497184037	-0.592748976	-0.639342453	-0.905119294	-0.753043822	-0.813226569	-0.919066322	-1.049807948	-1.047845092	-0.855888167	-0.976923025	-0.945606514	-0.759682965
-0.023656429	0.0555607	0.234736637	0.397697574	0.415468798	0.57628887	0.650826601	0.685937823	0.62950322	0.869953274	0.928517959	0.916563458	0.977264917	0.967732369	1.076390333	0.949905349	1.052745902	1.0462809	0.960585911	0.972957938	0.838223471	0.714967667	0.82465967	0.638841594	0.621193105	0.571610961	0.532494676	0.451728276	0.327138466	0.216559185	0.246063475	-0.032615044	0.018567933	-0.218797139	-0.152596254	-0.452507811	-0.500600134	-0.544798293	-0.550173413	-0.633763375	-0.838591493	-0.836408898	-0.976009152	-0.953921148	-1.080299338	-0.978283388	-1.112946582	-0.968685714	-0.938427793	-1.06114362
0.150207917	0.206283355	0.147375298	0.298510898	0.513528444	0.571973355	0.71521687	0.660822653	0.594686925	0.854898497	1.035518278	0.961911651	1.057311025	0.979280122	0.843104416	0.946382256	1.008302157	0.988754436	0.997362674	0.829965903	0.927055376	0.878847385	0.796818294	0.681147608	0.624771487	0.552447957	0.612390299	0.434096906	0.336894575	0.285551413	0.172916567	-0.017815577	-0.113708893	-0.285878052	-0.257185198	-0.300019502	-0.45055445	-0.549594874	-0.516309062	-0.625814141	-0.851653054	-0.755121049	-0.887604464	-0.886709069	-0.988187088	-1.039783675	-0.993308982	-0.900306292	-0.984450937	-1.026951413
0.008770725	0.189612458	0.267273542	0.358391885	0.373334258	0.478542383	0.531133559	0.699579195	0.769830427	0.738375961	0.932871732	0.967394254	0.915098443	0.991961126	0.987843515	0.934904613	0.975342681	0.932750318	1.065258459	0.843167606	0.884683449	0.689190484	0.864842428	0.811189502	0.381384781	0.70995515	0.437805015	0.320628323	0.322799629	-0.007051974	-0.002329324	0.035544309	-0.253090036	-0.106464318	-0.402646855	-0.438531315	-0.698509742	-0.496273825	-0.670930366	-0.650922997	-0.778515712	-0.871566798	-0.847884497	-0.910613168	-0.924864258	-0.942699624	-1.00689452	-1.03290542	-1.081291184	-0.927691978
0.05879036	0.237519868	0.634880785	0.657129263	0.718467697	0.751921454	0.522658126	0.426479974	0.565517463	0.968198257	1.034816206	1.181767499	1.027599352	1.00179809	0.829408281	0.89771275	0.905655596	0.923792227	0.934586808	1.040727554	0.994052218	0.91854261	0.683235071	0.508599807	0.544673672	0.696699705	0.74279875	0.712407291	0.585550438	0.322579627	0.053910406	-0.065764434	-0.13197232	-0.249930722	-0.550251	-0.660127498	-0.685491621	-0.642616939	-0.610376394	-0.494534532	-0.72110274	-0.867913439	-1.014654301	-1.035227784	-0.971657528	-0.948681154	-0.903076146	-1.005660052	-1.017822873	-0.945632357
0.119440356	0.368372215	0.436964805	0.574741194	0.735912785	0.71592482	0.6418516	0.659372686	0.778745333	0.895391603	0.722245443	0.779182533	0.803597752	1.066962613	1.033791568	0.964640594	0.992955747	1.013318276	0.857531281	0.868455594	0.797234797	0.762882032	0.655536174	0.624139761	0.655860728	0.719965449	0.559360466	0.582854712	0.326875675	0.290097124	0.218468021	0.078085019	-0.182660898	-0.33383712	-0.422913308	-0.536614576	-0.657818436	-0.742367065	-0.665640678	-0.647306509	-0.629528274	-0.683169351	-0.709328612	-0.840813839	-0.751750761	-0.787257448	-0.880110103	-0.915974671	-0.780045198	-0.74439177
-0.100016472	0.164358311	0.350389614	0.469646265	0.405879533	0.557890789	0.641401046	0.667846641	0.93468968	0.864153873	0.834175052	0.920068161	0.9812021	0.869345224	1.037099735	0.9933243	1.03664012	0.833482878	0.885703192	0.854020099	0.8648249	0.713463607	0.732109175	0.564659688	0.702025964	0.614293219	0.639107486	0.390114496	0.427849901	0.190000677	0.040243587	0.037859908	-0.127046253	-0.325206827	-0.38369458	-0.329015059	-0.64620377	-0.56663037	-0.652241445	-0.710727672	-0.794221295	-0.840483739	-0.791943563	-0.842205189	-0.971245025	-1.027255328	-1.14996942	-0.97741489	-1.010075643	-0.96064503
0.082851823	0.330459357	0.29032709	0.36797404	0.478034675	0.547616846	0.639907563	0.695977877	0.800115391	0.873371392	0.814948727	0.923985962	0.892957679	1.064350976	0.965449131	0.952569701	0.920986847	1.02088331	0.985667703	0.88926416	0.974808862	0.803074368	0.85558014	0.69007246	0.603675575	0.515860783	0.479717362	0.355765949	0.256879638	0.175125949	0.110632897	0.016754217	-0.047316958	-0.163946654	-0.23430286	-0.479531125	-0.488056219	-0.606274193	-0.691242644	-0.702757393	-0.737879625	-0.804990756	-0.855452865	-0.880293704	-0.98150897	-1.013398121	-0.98963371	-1.004478775	-0.962217185	-1.000088676
0.167420436	0.222474991	0.24109005	0.279520336	0.422907585	0.562339406	0.552205308	0.593695582	0.834162222	0.879832323	0.916778245	0.959427811	0.899327471	0.966027468	0.97990938	0.9011903	1.032725498	1.030740395	0.983886858	0.939268602	0.945320897	0.855694011	0.791961406	0.728092652	0.644255748	0.508976468	0.479845797	0.426984929	0.335434376	0.203069262	0.119133781	0.030822452	-0.028660747	-0.204564885	-0.213758193	-0.394704291	-0.396365243	-0.550362845	-0.592412095	-0.696789432	-0.819160029	-0.888197017	-0.881901287	-0.961358389	-0.943862973	-1.009859157	-1.040155581	-1.008035636	-0.940795983	-0.947300549
0.278270783	0.387166563	0.536239865	0.56729536	0.66873016	0.947776624	0.66093645	0.611402543	0.738512987	0.836354555	0.788861895	0.758042169	0.834724732	0.933466859	1.068019577	1.151947978	0.952391506	1.03702682	0.818937193	0.739615171	0.655289053	0.625322448	0.755290549	0.698090452	0.756947187	0.788052463	0.767089246	0.675056028	0.611955149	0.378877169	0.193894676	-0.02214417	-0.108522485	-0.404369226	-0.720831393	-0.583835863	-0.641795246	-0.710136394	-0.710654726	-0.623313037	-0.712699186	-0.678772341	-0.665666215	-0.642728979	-0.878891053	-0.739250923	-0.96591159	-0.982310882	-0.874807278	-0.830948546
0.240505266	0.396010145	0.571224884	0.726994751	0.596008075	0.752278748	0.725985406	0.706660664	0.641548679	0.752150108	0.637153794	0.842886255	0.918683789	0.756978718	0.985842998	0.905780919	0.97328999	0.97410356	0.878191871	0.793429831	0.668149028	0.718912773	0.700652282	0.626521622	0.854977604	0.769419795	0.78783887	0.583781777	0.549032785	0.455490145	0.3373419	-0.032221681	-0.253342376	-0.387705638	-0.632168636	-0.716481587	-0.719390776	-0.596760595	-0.650185185	-0.714191425	-0.622211906	-0.643939209	-0.658726715	-0.687365265	-0.79818362	-0.784323115	-0.815931522	-0.893424901	-0.825462126	-0.888500289
0.179841161	0.225098316	0.460425153	0.653219627	0.732727713	0.67081586	0.444833655	0.4331937	0.603971616	0.886374958	0.931961853	0.958400622	0.821427099	0.761603748	0.768244396	0.802320948	0.805295889	0.806999164	0.866881168	0.846351708	0.929249139	0.788000296	0.449769518	0.409473743	0.50210737	0.597565077	0.763578651	0.707237161	0.490362586	0.225831045	0.020698628	0.011585901	-0.043075604	-0.291615439	-0.497897569	-0.685564646	-0.607821835	-0.715887623	-0.394202038	-0.33315229	-0.475681076	-0.760206526	-0.875865555	-0.954877218	-0.812057047	-0.802310379	-0.715916959	-0.771880444	-0.82323341	-0.792425401
0.116020795	0.257585939	0.437168913	0.322756479	0.448777415	0.682713491	0.632712333	0.628972722	0.537296874	0.846788785	0.785849117	1.11776104	1.029585718	1.027768647	1.021931962	1.071397948	1.021978748	1.074143501	0.901231644	1.030992168	1.046621096	0.80632704	0.81354982	0.684434031	0.546111888	0.600776291	0.608983075	0.280755038	0.350122129	0.169435487	-0.00904129	-0.114477756	-0.099422604	-0.085015431	-0.245373245	-0.420441973	-0.488400379	-0.628768598	-0.694260268	-0.887489017	-0.766296707	-0.942376274	-0.954136988	-1.028169188	-0.923713346	-1.065700601	-1.130709411	-1.016495851	-1.063972199	-1.016285043
0.04369674	0.18339644	0.328904944	0.443806956	0.548012449	0.599158596	0.422789092	0.268928955	0.099779313	0.025823654	0.06464854	-0.047887119	0.126192126	0.310135861	0.435000799	0.468912221	0.408274792	0.355005484	0.11968702	0.080656574	0.099705784	0.086215009	0.071955087	0.220671034	0.412999723	0.562894955	0.552137	0.511411976	0.39478533	0.209185341	0.046568872	-0.015781675	-0.011190196	-0.196415998	-0.383449649	-0.49556017	-0.588507173	-0.556622821	-0.421045416	-0.292226241	-0.087902284	-0.076003124	-0.071347328	-0.045789511	-0.137915689	-0.274893273	-0.50091308	-0.513333094	-0.498592706	-0.343272137
0.014402356	0.184124582	0.388977701	0.455299183	0.44261399	0.622910535	0.659599135	0.76184641	0.80757547	0.985522503	0.863856073	0.907564466	0.942201291	1.05757566	0.990811951	0.968541166	1.026981005	1.03560292	0.96899304	0.98561564	0.820223665	0.848288308	0.933522158	0.700032509	0.421484734	0.606962895	0.441760927	0.401605164	0.411043747	0.136568579	0.03975574	0.053758456	-0.102071417	-0.203589671	-0.321035791	-0.348736143	-0.46808568	-0.588412196	-0.675769152	-0.621244961	-0.729541689	-0.901939488	-0.902602101	-0.915542413	-0.912361446	-0.839489187	-1.033451473	-0.961594833	-1.011314565	-1.126238953
-0.058765604	0.176136462	0.33902029	0.385500665	0.504965303	0.378671121	0.760508318	0.637097951	0.829632032	0.840723169	0.942149804	0.915904019	1.002054866	1.191278434	0.948067425	1.038561162	0.979381483	1.026139831	0.936513327	0.859318638	0.898751548	0.828992482	0.760772674	0.679225336	1.055632935	0.465912769	0.437197897	0.402790473	0.305261878	0.35437426	0.042872192	0.029218293	-0.144658102	-0.235136843	-0.329602548	-0.398787594	-0.473360397	-0.584755173	-0.616909414	-0.606601341	-0.692193578	-0.720721973	-0.955791908	-0.980333999	-0.872759481	-0.900402384	-1.036718941	-1.015854127	-1.011849517	-1.011904503
-0.016224524	0.075770829	0.298441121	0.270988289	0.313127899	0.545150897	0.677953711	0.619578285	0.705947347	0.795912918	0.876080778	0.859383383	1.048045632	1.013029883	0.900036748	0.958053458	0.925469534	0.929360655	0.973527189	0.928262703	0.855557466	0.791698782	0.714585824	0.623903466	0.395011389	0.502840775	0.553469238	0.437413339	0.288664994	0.121785889	0.113060569	0.042789733	0.011272266	-0.146204026	-0.34608331	-0.293822157	-0.385673816	-0.533410895	-0.724302567	-0.603968644	-0.803925879	-0.779670086	-0.850164525	-0.849000752	-0.944116316	-1.03467125	-0.939588494	-0.937354581	-0.953774938	-0.971390146
0.157269883	0.325837282	0.413241072	0.44850369	0.521721872	0.410558888	0.720170383	0.726489705	0.775668343	0.807651106	0.918799805	0.934441175	0.922698178	1.00554455	1.01373261	0.87227562	1.051410354	0.924996648	1.013174244	0.945286709	0.931558881	0.888981204	0.92430283	0.696498241	0.719207756	0.524069229	0.291683805	0.457951046	0.429419673	0.209587663	0.211817659	-0.107792765	-0.206563536	-0.280662766	-0.322193922	-0.401096434	-0.528242134	-0.600675942	-0.814540947	-0.724169228	-0.842177065	-0.89599291	-0.875510851	-0.908042649	-1.046043289	-1.107786665	-0.941284099	-1.046855672	-1.098987292	-0.977549149
0.072265995	0.225752476	0.295515553	0.388753615	0.402528281	0.614303787	0.62980539	0.485398875	0.830534257	0.817807456	0.971805418	0.934972078	0.913432868	0.953277001	0.953020304	0.906688629	0.966037124	1.037168797	0.839519815	0.957720636	0.826563536	0.809689892	0.823406793	0.65543812	0.661142967	0.530170022	0.52395619	0.482286804	0.280797206	0.326206675	0.149344225	0.016527891	-0.07027124	-0.123553698	-0.335082717	-0.365353395	-0.336352789	-0.508301455	-0.715861883	-0.696095116	-0.801634872	-0.870212216	-0.954523651	-0.878464912	-0.924286576	-1.094231596	-1.038279663	-1.072527854	-1.165032782	-1.192575761
0.163544428	0.133657778	0.29610124	0.428731285	0.436491847	0.60084362	0.725591058	0.845904787	0.759088268	0.836600976	1.04087684	0.960575581	0.957517017	1.123890898	1.016260673	0.971464506	1.044816031	1.140158103	1.092084396	1.003712198	0.95681714	0.769791839	0.775068501	0.64017769	0.593234373	0.590182263	0.428434545	0.295995933	0.355112714	0.223663496	0.179361927	0.072380694	-0.125629681	-0.200609987	-0.245316558	-0.341198613	-0.606237434	-0.55348422	-0.751976911	-0.752126315	-0.753704528	-0.849188816	-0.857698362	-1.035407108	-1.106041433	-1.070029651	-1.192511098	-1.180734006	-1.124792654	-0.875499337
0.17646038	0.324009203	0.322921889	0.384660981	0.612835798	0.578344943	0.547850042	0.695409676	0.810897849	0.918091349	0.876689742	0.897338196	1.016081584	1.078010249	1.145952428	1.042388193	0.988763582	1.143247027	0.991268548	0.975737943	0.948921821	0.811876273	0.733020726	0.611179841	0.791386841	0.575648427	0.486855844	0.251263178	0.25901287	0.240441279	0.208075205	-0.004787285	-0.139393621	-0.23498709	-0.373552005	-0.345114429	-0.41226726	-0.630836161	-0.685632902	-0.768782637	-0.840170512	-0.862740246	-1.030518869	-1.078562632	-1.077064422	-1.080089207	-0.965449287	-1.030633806	-1.144752287	-1.049139456
-0.033935422	0.171044376	0.256722036	0.115261311	0.521841451	0.546621176	0.482642823	0.663776205	0.960420468	0.873829801	0.943419298	0.878980506	1.076856892	0.808196242	1.046198442	1.020753655	0.960568357	0.947363762	0.875772621	0.862194394	0.817261584	0.719536148	0.868426296	0.949176977	0.522713626	0.49929787	0.436646333	0.182466284	0.194931673	0.008104299	0.056115803	0.037752087	-0.10606671	-0.234251622	-0.458348787	-0.465326238	-0.478158047	-0.422077491	-0.666256525	-0.614491754	-0.84717036	-0.866302714	-0.759389588	-0.912074404	-0.894643742	-1.014982902	-0.913016313	-0.902817277	-1.01787295	-1.18606516
0.163893596	0.146751663	0.388071662	0.426846799	0.533511711	0.570541882	0.732703502	0.871079126	0.725598417	0.792824431	0.895001562	1.015360009	0.918094476	1.06909922	0.953978944	0.953724388	0.936211339	1.207301297	0.945932644	0.886884208	0.956439228	0.744571595	0.869044974	0.596792215	0.613758668	0.446065631	0.531360283	0.259528479	0.263422141	0.225865204	0.112143231	-0.039755967	-0.138080332	-0.165777337	-0.24115011	-0.340427391	-0.40957972	-0.544408107	-0.717389154	-0.654968348	-0.737338168	-0.86099543	-0.776514058	-0.841532197	-0.826892845	-0.942375553	-0.983702805	-1.003673027	-1.067853995	-0.918056042
0.203206173	0.123484827	0.253188211	0.377193616	0.414212569	0.515386617	0.665591644	0.703065646	0.740118259	0.824681662	0.9206661	0.955389148	0.800571774	1.090668946	0.967015043	0.990106567	1.117605117	1.018000482	0.958709223	0.906333402	0.887093862	0.720882422	0.838835435	0.798433882	0.603135573	0.529645354	0.533473441	0.424043657	0.418391177	0.251994229	0.177089148	0.009553488	-0.130490002	-0.305399587	-0.349595093	-0.40384968	-0.484140237	-0.578402115	-0.592462134	-0.75006862	-0.742644703	-0.925839873	-0.961331823	-0.91476876	-1.029903833	-1.035561704	-1.132614752	-0.993175743	-1.149067752	-1.049007042
0.197201299	0.181255484	0.213690386	0.399517758	0.429200413	0.588287879	0.793802823	0.80839115	0.813518468	0.778225092	0.964828086	0.944036787	0.969960676	1.057035088	1.057740623	1.005165744	0.974162892	0.933202509	1.10698191	0.925942421	0.942687471	0.87715642	0.803368493	0.755133281	0.709253691	0.619439611	0.403187788	0.36813078	0.33907464	0.163410149	0.059059745	0.077760058	-0.129326328	-0.245682227	-0.412503106	-0.383908871	-0.576778831	-0.527606246	-0.696482915	-0.711086724	-0.783730717	-0.858410033	-1.05908245	-1.068576483	-1.025974009	-1.014127287	-1.017982443	-1.046101243	-1.102011069	-0.816316713
0.009945471	0.297154458	0.493302596	0.632974924	0.737133837	0.678656243	0.524743913	0.429407259	0.681116311	0.811626371	1.004736392	1.00229934	0.996251456	0.883694347	0.847179814	0.869812855	0.853736134	0.804373798	0.838688425	1.038709709	0.990504059	0.851399819	0.573697702	0.439464465	0.506172067	0.584150468	0.699744899	0.61742774	0.473620327	0.223017378	0.056466428	0.031314688	-0.098776547	-0.20670303	-0.506057861	-0.650569824	-0.767329304	-0.630635359	-0.489442755	-0.384611673	-0.640384879	-0.777167653	-1.007393497	-1.019034475	-0.950576001	-0.90496486	-0.887756949	-0.931117308	-0.834781545	-0.784097909
0.142010943	0.227976517	0.281278974	0.420079512	0.463601079	0.606841039	0.698310546	0.706514472	0.738831005	0.880378555	0.862414592	0.942540584	0.982695038	1.001373363	0.889804407	1.041909239	0.923372214	1.027825821	0.931717555	0.967280923	0.844339451	0.878973189	0.763521725	0.720787663	0.734099315	0.498589135	0.499396536	0.279142361	0.267479104	0.177700417	0.069287857	-0.089195222	-0.056887312	-0.214067315	-0.313192926	-0.435221226	-0.365989404	-0.520901256	-0.585157092	-0.680948361	-0.691834535	-0.822285176	-0.957862113	-0.954768531	-1.018850724	-0.981638809	-0.948623043	-1.029302283	-1.014924623	-1.094480057
0.078530128	0.262808782	0.599594199	0.60596031	0.725434348	0.661258197	0.839085643	0.683049345	0.655855343	0.702447671	0.718870994	0.789201994	0.951797182	0.854387846	0.939680769	0.898991136	0.856279851	0.963723728	1.020684031	0.787377086	0.683126089	0.759220143	0.727711528	0.774624952	0.777581052	0.625690279	0.779781081	0.83735416	0.58003005	0.365049579	0.306626315	0.192285679	-0.117619921	-0.422549231	-0.556925349	-0.745187452	-0.536266522	-0.760196593	-0.72353541	-0.590072424	-0.619487512	-0.68208507	-0.625589901	-0.706041597	-0.64589079	-0.813008004	-0.857932158	-1.085302912	-0.752423596	-0.717283346
0.115418676	0.29855242	0.423763018	0.636189153	0.74146226	0.702476453	0.427520999	0.404035446	0.485719473	0.833462427	1.007456299	0.909936791	0.806424854	0.760598932	0.753754644	0.674588282	0.769556293	0.621262013	0.818189936	0.801256267	0.875074056	0.72416388	0.570380072	0.364602144	0.500932558	0.65899785	0.694881467	0.709969965	0.495960824	0.27351609	0.055113463	-0.047064122	-0.069946888	-0.218649666	-0.456321204	-0.487975619	-0.730805553	-0.662705876	-0.375950212	-0.508216285	-0.543290189	-0.875963387	-0.905451004	-0.86084296	-0.832899811	-0.75304031	-0.69726409	-0.670166649	-0.678202518	-0.719979578
0.081538027	0.263558498	0.10922948	0.407716602	0.438886004	0.707876901	0.839996634	0.680954429	1.012678316	0.791400926	0.967117903	0.926957938	0.914798324	0.887513953	0.928596612	1.010073352	0.72989226	1.085268788	1.082840342	0.871885691	0.82004145	0.69390545	0.60140412	0.676186606	0.592465161	0.585585404	0.388461345	0.57369788	0.213976871	0.204644537	0.099585824	0.016971575	-0.265635974	-0.185088549	-0.306190661	-0.627355566	-0.456975445	-0.788362377	-0.762596447	-0.714365148	-0.902211189	-0.870102736	-0.903846786	-0.858383011	-0.848257008	-1.031441112	-0.99627815	-0.996547227	-1.018334162	-1.073195031
0.133665664	0.371863922	0.443890998	0.466615219	0.541991133	0.448506274	0.783475103	0.507435835	0.843440502	0.790880257	0.855897803	0.941855211	0.902813358	0.860822481	1.061169541	1.122179579	1.097594323	0.753284012	1.135419005	0.9733582	0.904130024	0.784096659	0.869948614	0.744647681	0.603794045	0.573017825	0.440481889	0.500549751	0.418671582	0.198380746	-0.043898798	-0.063907907	-0.192361153	-0.153711498	-0.178347793	-0.372192051	-0.627629536	-0.460072141	-0.888509343	-0.71514014	-0.774606019	-0.925035221	-0.771448581	-1.009726703	-0.879093799	-1.11350099	-0.937394729	-0.973359283	-0.776577931	-0.983481154
0.07006823	0.247129102	0.301659586	0.455353922	0.419950832	0.514341423	0.745146655	0.758468781	0.575781843	0.783319138	0.924543734	0.902365756	0.935890974	0.940592778	0.965662451	1.009757231	1.03191763	0.919671604	0.965621782	0.890829389	0.922309155	0.816430792	0.809582369	0.704764943	1.162360463	0.615298077	0.3976007	0.484980616	0.298005021	0.284753838	0.197151054	0.076407661	-0.146029871	-0.153067164	-0.288024827	-0.321645184	-0.49401138	-0.619383455	-0.771959299	-0.777791904	-0.62481704	-0.897283931	-0.989534842	-0.87663411	-1.011406182	-1.056303013	-1.03434187	-1.134431354	-0.994068249	-0.91498127
0.032635983	0.195404129	0.308122793	0.480246211	0.451165142	0.535305019	0.637840323	0.689573354	0.721902521	0.909399202	0.855654972	0.896787379	1.005187699	0.949352823	1.002204147	0.974824215	1.022776919	0.962963645	0.941108539	1.002594817	0.802227031	0.824216078	0.725376306	0.746962648	0.649946876	0.666055333	0.509361644	0.401074377	0.304297272	0.236235307	0.108766127	0.013713177	-0.026090036	-0.21446286	-0.299323297	-0.322660068	-0.548838044	-0.60622693	-0.576465299	-0.712914509	-0.705645414	-0.823527736	-0.934491846	-0.874715438	-0.864117991	-0.98777091	-0.978740063	-0.97443241	-0.983901947	-0.960703299
[truncated: 635 more rows]
[truncated: 590 more columns]
