# Supplementary material for: An Improved Power Quality Disturbance Detection Using Deep Learning Approach
Source: Hindawi journal article supplement (doi:10.1155/2022/7020979), 2022-05-21
Supplement: f1 [file 7020979.f1.zip › 7020979.f1/x30db_test.txt]

0.11895716	0.171913527	0.288056465	0.377809453	0.454192217	0.540884761	0.617425468	0.68747885	0.790224816	0.846172896	0.889059128	0.917621008	0.977081518	0.95510235	1.000060626	1.014887324	0.990181075	0.968354657	0.959594058	0.919591316	0.874472539	0.840985251	0.742800142	0.693868684	0.637755853	0.541554579	0.444416044	0.388348913	0.31930249	0.197305235	0.073020423	0.017663039	-0.102663061	-0.194276868	-0.291117292	-0.365876995	-0.473988286	-0.558762962	-0.636198836	-0.722591396	-0.780748722	-0.84379582	-0.877251179	-0.928489204	-0.931970178	-1.002907763	-0.986952771	-1.0194959	-0.994893036	-0.964207574
0.118769489	0.200342703	0.295452928	0.386419801	0.480066762	0.566019984	0.644277941	0.716004564	0.766845773	0.800887457	0.846789954	0.897692718	0.941469998	0.988256153	0.977241911	1.004878695	0.992917972	0.997868788	0.96909932	0.910494026	0.89370866	0.844101047	0.772934257	0.716286294	0.641479871	0.585133423	0.459364145	0.41909767	0.321160276	0.200667998	0.124867665	-0.049391728	-0.067002972	-0.198083717	-0.271545072	-0.396032194	-0.447519021	-0.536278646	-0.630253101	-0.716963772	-0.786547894	-0.838933627	-0.908883009	-0.940617582	-0.956303572	-0.986891219	-1.014615019	-1.010927221	-0.984703243	-0.993149168
0.083713888	0.187958276	0.287786818	0.397023057	0.470712724	0.562983403	0.64111914	0.725772898	0.75962209	0.84284205	0.892373697	0.943606338	0.963333408	0.953334334	0.980789121	1.000246563	0.98952175	0.980475678	0.963676057	0.91947681	0.854067453	0.821162894	0.746190852	0.710157755	0.61424242	0.575617265	0.45207278	0.37618823	0.302162215	0.218901211	0.095852106	0.011782569	-0.088230249	-0.179259509	-0.320849781	-0.395994885	-0.467008773	-0.542919595	-0.642421374	-0.693369641	-0.773249885	-0.808803802	-0.881934077	-0.913438911	-0.950823757	-0.991452585	-1.011452766	-0.993443521	-1.012159444	-0.991681324
0.090610251	0.160194444	0.291853328	0.412716323	0.488545746	0.541619155	0.661156433	0.696223506	0.720879765	0.868938168	0.894331682	0.945425352	0.979103152	0.995397041	0.970727479	0.974585837	0.980284181	0.980331098	0.972380647	0.955154426	0.90149401	0.812666727	0.802155435	0.680796175	0.671558746	0.591850021	0.508177755	0.447877214	0.318689501	0.248463233	0.185490466	0.058733577	-0.053191917	-0.197954568	-0.307384695	-0.363689686	-0.510449544	-0.600649015	-0.653377938	-0.774594066	-0.83815422	-0.923166547	-0.910970121	-1.008983635	-1.012284654	-1.033609449	-1.107990307	-1.125042932	-1.080341878	-1.04259519
0.143582676	0.209112478	0.280330527	0.381354414	0.495649662	0.577932356	0.645318456	0.756254957	0.804611653	0.838926089	0.905862915	0.95835651	1.030820169	0.994087226	1.048478762	1.037755317	1.031876278	1.021207492	0.983906344	0.90332524	0.941096203	0.868494902	0.826777127	0.733833722	0.650547	0.599264161	0.465238129	0.402732394	0.310163616	0.203609579	0.100249808	0.007607037	-0.05783958	-0.210487635	-0.317337959	-0.415837356	-0.525191164	-0.564877212	-0.68994321	-0.730517837	-0.811351174	-0.900479298	-0.98305305	-0.965813526	-1.014026949	-1.059064018	-1.031696648	-1.072375412	-1.078441165	-1.049605459
0.120040466	0.205949107	0.321970796	0.364604992	0.454802564	0.574905921	0.625373701	0.719782364	0.778388557	0.80709339	0.891318649	0.915648627	0.931286437	0.988567289	1.021595778	0.954417167	0.946319178	0.959693593	0.985198702	0.920005768	0.870441587	0.868064484	0.803169961	0.69373354	0.597387279	0.568327412	0.475036059	0.412201371	0.305898351	0.207174107	0.082561851	-0.018819872	-0.110016083	-0.173017514	-0.304413186	-0.38117103	-0.460212659	-0.555007589	-0.594071423	-0.743085984	-0.742174939	-0.821043816	-0.899395434	-0.934163798	-0.967386053	-0.996658751	-0.972422555	-1.015346197	-0.984103796	-0.968542492
0.12292853	0.174224309	0.254216203	0.402422973	0.471423524	0.537871936	0.647631102	0.683083723	0.788873362	0.835284762	0.902787191	0.918514144	0.952392757	0.977351414	0.984779443	1.002440596	1.023897335	0.968315381	1.039150799	0.937795666	0.877029821	0.820866594	0.787692808	0.741011321	0.26506729	0.541117903	0.452574703	0.38828904	0.299984445	0.173771349	0.075867604	-0.009673065	-0.085008296	-0.195784152	-0.281040145	-0.379671168	-0.490588309	-0.556555325	-0.629886672	-0.707281788	-0.775644056	-0.85089729	-0.919033745	-0.919964828	-0.95387676	-0.915328672	-0.976017472	-1.019541403	-1.009854149	-0.968840069
0.239165189	0.457966109	0.596901776	0.631550977	0.636094063	0.603718781	0.556883068	0.653454213	0.670927187	0.750373188	0.843462316	0.925443185	0.95747822	0.940373064	0.887529602	0.886359396	0.861171556	0.89531462	0.90878123	0.903522509	0.9091103	0.758303945	0.689498116	0.588425455	0.550903448	0.615537806	0.595881911	0.611352967	0.606265868	0.476201977	0.286207419	0.01254257	-0.271208637	-0.457798201	-0.609912346	-0.662918072	-0.654634637	-0.574384563	-0.599597365	-0.602189179	-0.713698162	-0.810672681	-0.894743787	-0.926780735	-0.915116645	-0.86587594	-0.931308263	-0.846080898	-0.875596866	-0.897921644
0.118491069	0.208771372	0.326502512	0.394364735	0.485895433	0.559716843	0.619903023	0.674223909	0.799915472	0.814849293	0.915183944	0.93509614	0.943026613	0.968763677	1.003761074	1.025142477	0.962186416	0.985032176	0.971624209	0.940704453	0.864103414	0.847639366	0.77064964	0.703846993	0.645618821	0.536843918	0.464201869	0.371111981	0.299185957	0.20190602	0.087811924	-0.004390348	-0.108455957	-0.188447946	-0.237177769	-0.389567591	-0.469874926	-0.563657717	-0.686986551	-0.703206637	-0.763813243	-0.805934266	-0.89268743	-0.899988265	-0.960719465	-0.948728272	-1.018325469	-1.00457707	-0.996594006	-0.957533244
0.099224203	0.204340693	0.266901847	0.359939724	0.486182627	0.544444877	0.622502059	0.683995016	0.757246439	0.828769564	0.84785166	0.918658253	0.97538994	0.952378093	1.005825165	0.965281512	1.004304297	0.955292133	0.9803287	0.938338978	0.883309566	0.849029286	0.766866801	0.728443601	0.630401547	0.529317803	0.489297155	0.37381486	0.267476758	0.175986314	0.083352805	0.021894014	-0.10359803	-0.219030533	-0.293068748	-0.373023023	-0.447250908	-0.523129629	-0.636544188	-0.713058294	-0.757730209	-0.801985926	-0.844505673	-0.879602129	-0.96373583	-0.976880848	-0.995279285	-0.982053837	-0.994777467	-0.994415102
0.135204944	0.243248526	0.255702538	0.352136707	0.49050551	0.569184385	0.63495971	0.661295821	0.775245396	0.781077342	0.909842028	0.896397621	0.916409823	0.956435312	1.013645456	0.925826533	0.998305501	0.971919573	0.920579209	0.929182497	0.897721854	0.812356034	0.776631984	0.683218058	0.631399248	0.564232335	0.456451904	0.39765269	0.263194453	0.244416645	0.127266574	0.013376858	-0.12199594	-0.163810666	-0.258129072	-0.369201203	-0.476427935	-0.540702161	-0.618737485	-0.674710059	-0.730428683	-0.82798	-0.887895001	-0.969519283	-0.946450669	-0.984547525	-1.021297482	-1.015076405	-0.997056056	-0.992242732
0.0962327	0.23866157	0.240682	0.336763888	0.490820296	0.577024727	0.636176387	0.7145571	0.82469213	0.868159316	0.911308636	0.942010305	1.018576536	1.004915273	1.019385027	1.067020011	1.02819834	1.026808586	1.00181356	0.965419575	0.918371179	0.90457656	0.783704401	0.730823638	0.626254659	0.558928675	0.440281426	0.400317667	0.34466908	0.187280735	0.115356511	-0.047576098	-0.116925421	-0.207597704	-0.309641667	-0.387671711	-0.498886292	-0.598765673	-0.686283331	-0.721801238	-0.835493365	-0.932809591	-0.935958366	-1.037255541	-1.02200576	-1.06376393	-1.068209794	-1.101664116	-1.095284535	-1.094159262
0.065193598	0.173909477	0.34778281	0.476522892	0.569603726	0.552682926	0.447528797	0.296716518	0.170536404	0.03938677	0.041315264	0.116468877	0.263022625	0.421790017	0.542800614	0.620069562	0.562291776	0.420288112	0.244643952	0.112064772	0.047953761	0.050158902	0.164065414	0.278397932	0.44482828	0.556084892	0.575895655	0.494923008	0.34176462	0.185871313	0.08183631	-0.008526516	-0.059086819	-0.196657174	-0.350001351	-0.478026234	-0.567003518	-0.542326311	-0.446863776	-0.294356967	-0.15850352	-0.039044261	-0.045537135	-0.105181034	-0.264561394	-0.433548663	-0.5614502	-0.581672812	-0.563928932	-0.43125443
0.053700702	0.189907995	0.381850077	0.500587152	0.56268094	0.541796555	0.370812225	0.16915945	0.043075099	0.205605195	0.267733195	0.207065587	0.056278478	0.134451632	0.284113555	0.355274509	0.279079745	0.150562572	0.0129082	0.204863004	0.260933534	0.182169689	0.035692213	0.177612608	0.371722528	0.542576344	0.570162222	0.5226621	0.346365381	0.188756736	0.07455461	0.004116974	-0.030876924	-0.192406126	-0.370847199	-0.540404152	-0.585010613	-0.524085191	-0.382308043	-0.181512002	-0.048446915	-0.214904458	-0.276295046	-0.177245467	-0.048684763	-0.138652664	-0.28176492	-0.325561571	-0.298280566	-0.134150063
0.104625739	0.200592337	0.298320773	0.406084322	0.449056942	0.534835747	0.650779845	0.705764591	0.754181427	0.829291839	0.843507425	0.922552352	0.989061359	0.997619954	0.970541204	1.014678353	0.975864971	0.944680415	0.949748393	0.914659796	0.886242313	0.824381963	0.791998951	0.709261243	0.636793325	0.537376684	0.470666453	0.376640531	0.320679995	0.217896485	0.101313917	0.018968474	-0.056172721	-0.188869848	-0.2899285	-0.412029577	-0.455500628	-0.540461364	-0.652772832	-0.688887974	-0.748872328	-0.84073008	-0.87283675	-0.905012399	-0.940555474	-0.986268793	-0.989986017	-0.980095887	-0.985981022	-0.99997786
0.090745044	0.181003053	0.279080387	0.389111992	0.526193425	0.574818453	0.639532481	0.717538419	0.783110904	0.875589633	0.881583317	0.932874217	1.011216446	1.02296301	1.050076003	1.007041361	1.015706991	0.996387795	1.026956895	0.924310993	0.936859028	0.896817143	0.841551966	0.737604507	0.668545706	0.566579619	0.473862924	0.391009514	0.311047385	0.212182278	0.094769904	0.015096798	-0.075045015	-0.217639019	-0.274543687	-0.433911221	-0.485809585	-0.611580399	-0.662758641	-0.740124568	-0.847757005	-0.908490358	-0.938880597	-0.994093216	-1.009632416	-1.047677259	-1.039881479	-1.09574932	-1.052140809	-1.049090267
0.072909198	0.201350532	0.304724913	0.382544539	0.478989885	0.559032002	0.622992203	0.691880762	0.766470394	0.840781184	0.881835342	0.914711595	0.944006622	0.991366869	1.004132039	0.968541574	0.984556305	0.974564052	0.955593496	0.941649316	0.877802235	0.838791781	0.772088711	0.732011378	0.614642069	0.552228898	0.474953007	0.376998128	0.318522663	0.201778172	0.09960398	0.001648398	-0.08266575	-0.157520481	-0.303301481	-0.385194733	-0.475012547	-0.530792136	-0.636704545	-0.718237984	-0.755054777	-0.859910844	-0.880436118	-0.903910583	-0.942659019	-1.017239945	-1.014379893	-1.005854168	-0.989857659	-0.98278072
0.123177269	0.166572896	0.289051646	0.368942697	0.473816033	0.566408806	0.637356378	0.678137605	0.743479512	0.860179894	0.856842578	0.92009647	0.954456361	0.990782363	0.972679322	1.009593962	0.992363703	0.974478417	0.936561886	0.952625401	0.845297554	0.816521366	0.801016286	0.731059832	0.647143609	0.579424604	0.480429307	0.421769887	0.327796914	0.185165438	0.116521317	0.007030346	-0.081174771	-0.189429099	-0.317128124	-0.393072986	-0.45704106	-0.567340614	-0.640282986	-0.69497615	-0.780517453	-0.852418721	-0.860680108	-0.943035805	-0.966263767	-0.957527033	-0.996545891	-1.001673521	-1.007186433	-1.002299459
0.097761308	0.219196047	0.309479343	0.392078517	0.473835703	0.568284918	0.623619008	0.712219385	0.792196204	0.838241471	0.876538907	0.913052669	0.984830349	0.964839717	0.954256761	0.996304637	1.018157566	0.959557084	0.94674797	0.919437206	0.872895046	0.854134358	0.767257661	0.699794987	0.462246861	0.562185516	0.497578296	0.364660121	0.288906087	0.195242303	0.063747371	-0.019121644	-0.093212685	-0.178732061	-0.276917271	-0.369933149	-0.498457189	-0.545307909	-0.5966332	-0.678821934	-0.767191933	-0.84394301	-0.87692659	-0.961377177	-0.965409092	-0.975698774	-1.021653935	-1.011063109	-0.985772152	-1.003287494
0.109302171	0.178916762	0.276873528	0.381930672	0.509067683	0.564215596	0.63113455	0.703144054	0.771083914	0.856259548	0.911156555	0.946053233	0.996031024	1.009954765	1.047311872	1.01874108	1.054387693	1.031042739	0.986799699	0.927774923	0.92460885	0.899518084	0.789828982	0.737431405	0.668800775	0.585865321	0.522810249	0.415807533	0.303844902	0.195525876	0.088459906	0.002691036	-0.079787406	-0.215489566	-0.323191837	-0.4200372	-0.493034776	-0.605160192	-0.687785076	-0.770818254	-0.805935177	-0.86478838	-0.972689412	-0.978073322	-1.018156993	-1.04823438	-1.065263592	-1.083727133	-1.100265081	-1.030655501
0.118381138	0.180252136	0.27671751	0.373810135	0.485840184	0.571332341	0.607610819	0.686459535	0.796302352	0.844179046	0.870456361	0.900108433	0.930675806	0.972638526	0.982170016	0.983688569	1.001753409	0.999844325	0.953129595	0.933152021	0.873214511	0.841160662	0.83433258	0.714475567	0.647400471	0.532594387	0.477755169	0.37140188	0.305436004	0.195221513	0.108753575	0.037913579	-0.107188819	-0.200130412	-0.283249713	-0.369587593	-0.489738987	-0.559542764	-0.656931591	-0.729656029	-0.786647553	-0.797174817	-0.892331028	-0.930211958	-0.955161725	-1.000049087	-0.988919922	-1.018260614	-0.994113917	-0.977840109
0.075259399	0.215198612	0.425926528	0.596115473	0.667143208	0.581083579	0.396331006	0.304414842	0.491781917	0.70217389	0.803095542	0.814041649	0.70579232	0.660099243	0.637088801	0.649138398	0.625897996	0.648177781	0.723864735	0.800249563	0.816410191	0.720438851	0.479314376	0.308559815	0.409828925	0.547036254	0.660603858	0.591090693	0.447082516	0.243068484	0.056834884	-0.000355625	-0.066485891	-0.214961709	-0.430852458	-0.57824067	-0.673323143	-0.568745189	-0.426102117	-0.307490372	-0.455983913	-0.687038328	-0.797224068	-0.814743433	-0.754008734	-0.660991171	-0.642946071	-0.658856629	-0.636824837	-0.622957395
0.143331274	0.366979781	0.470620769	0.592644254	0.652837683	0.696579207	0.71551653	0.669732118	0.695604794	0.714126884	0.758021997	0.830367422	0.855066493	0.965580827	1.008408004	0.981364341	0.984000203	0.953395076	0.914729792	0.85912495	0.799665378	0.72497441	0.6845228	0.736385776	0.701309985	0.668671936	0.676728274	0.587470909	0.476320095	0.36572097	0.17367287	0.008714941	-0.158227649	-0.355517256	-0.463680445	-0.585596062	-0.629668146	-0.651864161	-0.699917684	-0.659165978	-0.687739914	-0.688239597	-0.753002584	-0.77552108	-0.77303136	-0.878544901	-0.891450613	-0.893628493	-0.880350033	-0.84433355
0.08765778	0.198972966	0.288696014	0.328617661	0.462879926	0.564714258	0.638814576	0.690935187	0.806990538	0.849524505	0.921145151	0.90527378	0.949322222	1.003540233	1.01316148	1.009613677	1.021025869	0.978893752	0.95191137	0.964313853	0.899731125	0.860315803	0.782711878	0.723311884	0.692957909	0.574657744	0.533323865	0.401982146	0.313951713	0.168767195	0.105634287	-0.0045699	-0.130897185	-0.189414232	-0.287660641	-0.390239933	-0.473470987	-0.62380337	-0.641035288	-0.78310621	-0.828175715	-0.914225775	-0.942628427	-0.982409481	-1.060008525	-1.044904183	-1.060609469	-1.050122377	-1.095096322	-1.038553985
0.081832484	0.247186055	0.455079677	0.666174868	0.720188809	0.614402028	0.458160213	0.370550813	0.566271704	0.770736491	0.917900186	0.892807872	0.866383976	0.810779085	0.778609456	0.807932996	0.780786088	0.776086928	0.864923481	0.924786259	0.911478984	0.807731159	0.595751445	0.394964089	0.466599877	0.648225088	0.734540912	0.641427116	0.471981371	0.252045203	0.06154511	-0.031572394	-0.074788367	-0.247657868	-0.454360923	-0.65532868	-0.702394087	-0.607132644	-0.464032873	-0.422478851	-0.592738564	-0.780643161	-0.884811184	-0.922651727	-0.879155513	-0.799086604	-0.791979024	-0.780032919	-0.788817808	-0.783927615
0.027590988	0.149328949	0.307828854	0.452869502	0.520397357	0.557925148	0.464341618	0.353543769	0.255699628	0.161043554	0.173417373	0.299101726	0.434147022	0.558738896	0.686801674	0.714198455	0.70392311	0.592536248	0.419797347	0.280854272	0.211366343	0.225402016	0.245599354	0.383173809	0.466687383	0.555490549	0.543111724	0.449901192	0.329516261	0.164647862	0.058382584	-0.002420629	-0.042419984	-0.149434502	-0.288277631	-0.459629861	-0.533076583	-0.541285686	-0.488790462	-0.363340198	-0.25497339	-0.184508171	-0.201888605	-0.288694356	-0.43547241	-0.561950864	-0.693926938	-0.716656424	-0.702260865	-0.543392924
0.07758265	0.211568389	0.312288957	0.383833698	0.505055073	0.555947177	0.633801078	0.723724535	0.81112563	0.803139415	0.853354094	0.968817838	0.947574493	0.987846333	0.968094659	1.02936395	0.985005042	0.981399549	0.944145438	0.908131922	0.887361052	0.836433387	0.78428351	0.673404981	0.887193527	0.554861323	0.47801791	0.38532176	0.285786863	0.190824786	0.065692116	0.02451011	-0.065002105	-0.1348999	-0.281674398	-0.325686517	-0.478931338	-0.524791441	-0.661850913	-0.739762342	-0.764482297	-0.858804473	-0.904359222	-0.909128422	-0.96298942	-0.992711983	-0.976306412	-0.996390578	-1.002947335	-1.004986979
0.158663433	0.359318613	0.478376232	0.564164025	0.684504631	0.666114739	0.678876118	0.696818143	0.703992094	0.715186358	0.784931914	0.891055823	0.915799025	0.947540823	1.006778466	1.017242271	1.03652915	0.948586071	0.905730596	0.861676418	0.807995489	0.771923955	0.727386746	0.725658592	0.718203696	0.71140182	0.685696475	0.560097369	0.483275114	0.387413858	0.200253422	0.008255245	-0.190583606	-0.297961918	-0.449720712	-0.595445653	-0.656535081	-0.670321485	-0.675710189	-0.625974201	-0.657386436	-0.67205061	-0.71061456	-0.734747317	-0.780690377	-0.88540275	-0.900198499	-0.915390171	-0.881958324	-0.861489912
0.050941476	0.210924203	0.391910452	0.543867265	0.609232106	0.499050927	0.32596149	0.228653837	0.377731487	0.586149445	0.681031697	0.662605023	0.55223368	0.46626706	0.438579163	0.427393481	0.413114944	0.475074209	0.538224853	0.664347438	0.675591062	0.575648882	0.391579158	0.253777232	0.328790275	0.536619697	0.613064232	0.560192231	0.415831545	0.208765279	0.048763583	0.015500894	-0.064806972	-0.173656705	-0.406782943	-0.550216414	-0.594703118	-0.52484516	-0.349197368	-0.213894487	-0.383334508	-0.573051461	-0.701644175	-0.649746181	-0.575457014	-0.479996647	-0.436253322	-0.437699314	-0.437503495	-0.434812645
0.124627903	0.175524245	0.27721682	0.391421292	0.436919887	0.514507881	0.623807679	0.683233581	0.776075312	0.837155912	0.861144674	0.92478716	0.917240062	0.984931395	0.996142286	0.977115959	1.012390023	1.010443616	0.956232004	0.891312062	0.934686928	0.84457772	0.77097846	0.715001354	1.078541551	0.566638025	0.459747428	0.39843658	0.313212575	0.231585947	0.074489386	0.015893224	-0.090245704	-0.192348845	-0.260620396	-0.387930398	-0.465642622	-0.568821192	-0.641707595	-0.74423734	-0.792400086	-0.837835877	-0.893379709	-0.943998792	-0.907994937	-0.969703793	-0.98431323	-1.003114223	-1.012423857	-0.970950156
0.10861101	0.192726414	0.288600775	0.389985845	0.50794081	0.590385402	0.638987163	0.715121996	0.793526022	0.853926254	0.888568808	0.946725939	0.978878464	0.986000158	1.022971637	1.06281462	1.003979205	1.04533424	0.994243853	0.941955469	0.931327144	0.885104519	0.828196028	0.727323802	0.637242835	0.592780734	0.504757052	0.410567298	0.305395648	0.219019207	0.098357606	0.008856787	-0.084201355	-0.198212889	-0.353672785	-0.388605401	-0.49113015	-0.589802521	-0.654479355	-0.742227711	-0.812704012	-0.878232572	-0.945585321	-0.989684831	-1.040993127	-1.067363966	-1.062789362	-1.084320715	-1.093623288	-1.074915324
0.073903076	0.192189645	0.269753343	0.372277985	0.46061544	0.545785223	0.644071904	0.689208749	0.752044613	0.837437324	0.867695952	0.936600707	0.972263448	1.017124643	0.989774906	1.002608286	0.984022136	0.977728477	0.968613991	0.929258211	0.885652805	0.812377299	0.777550805	0.741379027	0.636011143	0.538203703	0.469821857	0.354234715	0.288772665	0.177547323	0.127049782	-0.012362386	-0.07353649	-0.178120857	-0.300293522	-0.383479206	-0.4869445	-0.564328895	-0.627201669	-0.726715259	-0.779374887	-0.840121424	-0.852554353	-0.896076873	-0.963941572	-0.955024488	-0.977916238	-0.977371696	-1.011272051	-0.986890761
0.010012305	0.110389294	0.211611171	0.302766362	0.434012709	0.495903423	0.494351566	0.441569594	0.459743068	0.435365659	0.484139841	0.568446263	0.68462665	0.801000328	0.863200007	0.908950646	0.836822268	0.778016122	0.668420132	0.559091928	0.456615255	0.472751413	0.440317784	0.441129975	0.47443112	0.42922372	0.429702273	0.347909477	0.215368683	0.128730818	0.033817077	0.007207921	-0.049765911	-0.108973285	-0.237009393	-0.381373788	-0.423401139	-0.474747586	-0.491205218	-0.438405471	-0.430222892	-0.417665505	-0.488306575	-0.565466568	-0.668979299	-0.830900697	-0.855014386	-0.900757292	-0.847307916	-0.761184601
0.08495199	0.160910098	0.267468303	0.381870387	0.474999177	0.545062401	0.605312892	0.709799009	0.783635058	0.890021344	0.850889358	0.927488446	0.970775385	0.962308516	0.991977448	1.009186703	0.968807726	0.968501991	0.966989841	0.88266461	0.899910372	0.79038403	0.737745035	0.727608723	0.648736443	0.556409029	0.484164261	0.374417716	0.257806559	0.16781427	0.075868481	-0.02992198	-0.075048118	-0.217902619	-0.262591575	-0.374425453	-0.417758241	-0.597087078	-0.626170712	-0.668862387	-0.796758192	-0.829815352	-0.88761206	-0.909779297	-0.934365448	-0.964253569	-1.015997198	-0.997947151	-0.972606895	-0.999534002
0.0893763	0.217116889	0.292140944	0.370535377	0.461746319	0.555311823	0.641780718	0.698648474	0.782336674	0.835314504	0.898944124	0.94539642	0.956815322	0.97456613	0.993556137	1.01345415	1.018913785	1.023888621	0.979814956	0.933181923	0.922755278	0.884440236	0.797729874	0.743713465	0.647567446	0.575909995	0.488620719	0.405303931	0.328060505	0.18884722	0.107501621	0.002870854	-0.139858755	-0.195640591	-0.290180301	-0.388414025	-0.463994096	-0.583648193	-0.645737899	-0.71523385	-0.798779983	-0.8182942	-0.884664189	-0.972915526	-0.961430296	-1.074825066	-1.016480153	-1.015441191	-1.042004955	-1.039151492
0.084384094	0.227192652	0.291266334	0.413725307	0.478543098	0.546867365	0.69689554	0.702301982	0.758323218	0.87531569	0.852502182	0.941748939	0.966890687	0.99985177	0.978909496	0.99691606	1.038190617	0.960897896	0.973765767	0.926569693	0.892662371	0.788502858	0.809204332	0.71927735	0.654477578	0.5862622	0.475950468	0.388273336	0.312871091	0.168685106	0.08664709	0.017325603	-0.105662506	-0.178490632	-0.271236786	-0.367189219	-0.465306552	-0.583287228	-0.618816743	-0.697281316	-0.776901979	-0.793413045	-0.868189312	-0.894995903	-0.974264622	-1.031446864	-0.989646217	-1.036687963	-0.98779994	-0.981148655
0.085227415	0.246675873	0.291941672	0.380909804	0.468624429	0.558659703	0.609478702	0.711578413	0.784497729	0.838518906	0.908424105	0.872056258	0.95279619	0.995728336	0.960097982	0.972546287	1.009943953	1.013950333	0.945818284	0.926176601	0.888474992	0.84995836	0.788503116	0.717594382	0.651316123	0.575270741	0.461785848	0.409694787	0.287984737	0.224513879	0.080306043	0.041390505	-0.093787647	-0.232764874	-0.274293423	-0.395061196	-0.455852593	-0.576474545	-0.625590675	-0.689776766	-0.760834205	-0.83369774	-0.877164103	-0.920489755	-0.98361506	-0.981656722	-1.025194717	-1.002490374	-1.018971556	-0.987416562
0.064488657	0.222620961	0.331451349	0.402253348	0.508990457	0.560751627	0.648921341	0.726730669	0.804520306	0.824041514	0.917900927	0.905484828	0.943895218	0.879462662	1.002613635	0.956012958	0.973724531	0.993021775	0.98534042	0.953621144	0.905315547	0.848299037	0.771816095	0.692522806	0.628929613	0.539941444	0.456438334	0.330808954	0.282830924	0.245204058	0.047121271	0.014346884	-0.083630173	-0.174792774	-0.296646255	-0.454080712	-0.443540363	-0.554924622	-0.648144537	-0.723215791	-0.778511187	-0.79989939	-0.861968129	-0.961148641	-0.962484156	-1.000034394	-0.98185996	-0.987771697	-0.980539502	-1.000111379
0.120538136	0.156325005	0.327652649	0.393543843	0.50016928	0.564640436	0.637927787	0.73519077	0.784890161	0.824208478	0.866462227	0.923441266	0.946555543	0.97812424	1.005532956	1.001771442	0.970830668	0.998694361	0.950794812	0.907992043	0.863539248	0.802201625	0.748277144	0.716615262	0.633391997	0.54893443	0.491003838	0.396954017	0.303404719	0.179903005	0.118589256	-0.006840674	-0.09600014	-0.172801944	-0.276245777	-0.377170239	-0.444504876	-0.514006189	-0.644693656	-0.713500377	-0.773327131	-0.815887862	-0.850834732	-0.909029828	-0.947523774	-0.952116196	-1.005091912	-1.014784816	-0.993823598	-0.954885869
0.262741031	0.435166312	0.586179594	0.566432193	0.661409185	0.580792492	0.563735103	0.601220301	0.691928276	0.789657129	0.881581904	0.90223078	0.940322186	0.936963657	0.874331334	0.89997848	0.88366536	0.916754939	0.978075359	0.894071597	0.888036445	0.797310409	0.715693688	0.660061139	0.562344808	0.562487901	0.614650038	0.617981558	0.554351476	0.422202667	0.257276595	0.001597873	-0.264905681	-0.433140268	-0.555847582	-0.590463511	-0.600394897	-0.628157493	-0.56332985	-0.611834623	-0.719205391	-0.825088816	-0.865804078	-0.959038556	-0.920805458	-0.886486431	-0.876770385	-0.900655419	-0.877381116	-0.92790948
0.101080026	0.18556605	0.288788247	0.381222236	0.478461275	0.550377889	0.614543341	0.74631273	0.794262222	0.865403754	0.891470369	0.871692512	1.014728403	0.98954882	0.989954866	0.999202896	1.005407749	0.984061153	0.919666601	0.938469779	0.900166781	0.847629575	0.742772041	0.708803047	0.642038377	0.552798286	0.488289154	0.357004326	0.260149517	0.215317943	0.083965252	-0.024558379	-0.081634163	-0.183954503	-0.299140764	-0.367305824	-0.492218871	-0.541374521	-0.607763325	-0.695527316	-0.762702049	-0.887265345	-0.856227339	-0.911879377	-0.967332425	-0.97754071	-1.01950571	-0.976686488	-1.005898823	-0.962077303
0.11691351	0.195879875	0.274998232	0.366108135	0.49368386	0.573375038	0.65462273	0.730783124	0.793142871	0.812821662	0.888029279	0.931223031	0.948512071	0.970063521	1.004602958	1.062607821	1.002484939	0.990731452	0.992867319	0.977076327	0.896562808	0.859479429	0.797846491	0.71847928	0.649349013	0.637707268	0.48046331	0.373238361	0.309107086	0.222920794	0.065738262	0.002589674	-0.091553301	-0.183907654	-0.344275165	-0.410015844	-0.517209477	-0.587620775	-0.684479566	-0.734698544	-0.783816581	-0.923024283	-0.972043495	-1.007068982	-1.031728322	-1.0559627	-1.087870729	-1.073266748	-1.07556433	-1.053845034
0.105435103	0.187515141	0.297965383	0.3765114	0.461001386	0.581858871	0.654525609	0.704648933	0.757869227	0.817912958	0.870508624	0.869390441	0.98602948	0.984550057	0.99769083	0.998275771	0.982502351	1.031538982	0.967041791	0.897053202	0.873694229	0.837187026	0.803199445	0.717495894	0.469740122	0.537941323	0.465255789	0.39340412	0.282661855	0.203440662	0.112075498	0.028282326	-0.114525491	-0.179885861	-0.31703487	-0.436930352	-0.45982247	-0.581871482	-0.679152342	-0.67664141	-0.788165411	-0.829212612	-0.883835728	-0.947640555	-0.91312952	-0.968374539	-1.020317318	-1.024196372	-0.980787044	-0.998796837
0.109030689	0.202243163	0.257276372	0.435809453	0.471250081	0.517819152	0.645954977	0.699715808	0.757723812	0.792848368	0.876675021	0.904849562	0.980555869	0.986976907	0.988094154	0.985212661	0.999890398	0.981852959	0.982060322	0.936682062	0.879525385	0.871592572	0.734195895	0.691459731	0.496350476	0.560221331	0.498535893	0.393245034	0.24225348	0.223290485	0.06950206	-0.007443929	-0.098912161	-0.174766331	-0.302218621	-0.342866359	-0.478391563	-0.559733931	-0.649234849	-0.685675962	-0.784154247	-0.833127727	-0.909027612	-0.93428649	-0.95797259	-0.980569285	-1.007128447	-1.036608914	-1.008694612	-0.969481443
0.047745672	0.21254404	0.267040691	0.36688043	0.428286307	0.553927998	0.62890254	0.755163895	0.738720711	0.866013804	0.872418508	0.939923541	0.973335194	0.954318521	0.96681429	0.985401086	1.034529201	0.989044543	0.993922367	0.880393622	0.884821849	0.863157862	0.736277607	0.73398639	0.625373063	0.514783416	0.478259699	0.416741456	0.312243451	0.163093137	0.118306883	-0.015156348	-0.011148674	-0.205537537	-0.279302277	-0.387432679	-0.43202361	-0.517784221	-0.631621944	-0.702791185	-0.775958649	-0.858432858	-0.874798658	-0.940536591	-0.938900513	-0.946909395	-0.956082763	-0.960992654	-1.012494447	-1.031701738
0.05579382	0.126046882	0.233309359	0.318276787	0.412169082	0.484422645	0.504438514	0.464501552	0.431302947	0.423197329	0.471716196	0.521854074	0.65229385	0.766492947	0.893657341	0.912173121	0.874307448	0.766845457	0.64361878	0.549681153	0.471600961	0.408045685	0.405061222	0.426812575	0.489187972	0.482269874	0.432655693	0.369619533	0.260335161	0.114249866	0.013756405	0.017758323	-0.0538672	-0.100080515	-0.235978559	-0.383061189	-0.435753583	-0.485488492	-0.469717091	-0.453114447	-0.422861515	-0.398398488	-0.442199349	-0.537939534	-0.638656807	-0.792385115	-0.854296165	-0.893487682	-0.874044523	-0.751966512
0.176357567	0.346700981	0.510785182	0.64518037	0.696999403	0.713717724	0.6406398	0.696539198	0.726125295	0.71035622	0.742592241	0.790099119	0.873580376	0.92601106	1.021095794	1.028956518	0.9967738	0.928980902	0.859622329	0.828040191	0.799607984	0.751925308	0.734854828	0.729172291	0.71751317	0.722810265	0.680714308	0.619545281	0.524823184	0.362952059	0.161558192	-0.05426671	-0.16238866	-0.401086425	-0.522280478	-0.609160792	-0.666115609	-0.671210486	-0.671453551	-0.650720258	-0.670364349	-0.649157557	-0.712945975	-0.724725511	-0.788856164	-0.881921953	-0.897555246	-0.928048965	-0.913266047	-0.811362695
0.115161865	0.202147764	0.299313926	0.378522265	0.483811469	0.542345887	0.648615182	0.706747935	0.775679449	0.845935522	0.925381535	0.940582019	0.974466588	0.992461608	1.028732823	1.022995285	1.00650985	1.02787106	1.003490735	0.940154231	0.923150788	0.845417584	0.806555213	0.722773604	0.655207793	0.567068519	0.504473879	0.404955103	0.271153009	0.20900247	0.154101314	0.000607255	-0.141693097	-0.218371803	-0.293713772	-0.417762448	-0.523687085	-0.577162401	-0.672735015	-0.767287305	-0.821968848	-0.910072349	-0.953448905	-0.969964136	-1.03829007	-1.083286956	-1.06555817	-1.09532942	-1.079310077	-1.052210075
-0.114134463	5.042233604	7.901415022	0.118067969	-1.054743727	8.591927934	1.970227024	-0.989906545	3.742926183	-0.278232466	-10.27130977	0.380878861	1.484510426	-1.881269005	-0.440551359	-1.229969014	-0.723359477	-4.951386172	-8.575419997	-3.468159016	4.062968579	5.148766129	-2.068065942	6.789492762	-1.814150921	-1.94165922	3.834509817	1.857840874	-0.230482153	-8.25903582	4.593753845	3.605667752	-0.527373666	-0.572331752	2.072615861	4.862346554	5.094885316	10.99879857	1.306332373	-6.848891036	1.778978201	8.661952978	0.168282869	-8.40464312	0.898075202	4.782413002	0.013318557	1.345772111	-2.734923862	-4.821532263
3.902040563	3.208616148	-0.908869907	-4.670274123	5.016933193	4.288048755	-0.948487466	1.729952897	-1.222432588	-1.984150034	5.810331466	-1.329490975	5.107089097	0.970155659	0.419452964	2.679875787	-3.600838275	-3.422711602	-0.344134134	2.154632019	1.445689029	-2.313386025	-3.024325425	2.008879744	0.591162661	2.032532022	5.908650983	-2.621362104	-1.967171846	4.289792264	-0.000561562	-2.695302114	0.070597917	-0.220785042	2.286606758	-3.670955743	1.388564716	-2.357418387	-9.184738949	-1.200273125	0.499622461	-2.055052697	-5.992519544	-1.518601516	-0.430864495	-1.892504979	4.629182391	1.094864347	1.228097806	4.191022865
0.20031828	0.35439767	0.510038302	0.601913026	0.647219454	0.751853523	0.723499555	0.65695912	0.723710882	0.768398082	0.762128099	0.869326881	0.92934202	0.95907835	1.053755713	0.991167011	1.019885367	0.946222082	0.878917297	0.820722837	0.770673129	0.760568868	0.710106795	0.725000505	0.715545881	0.739496686	0.687038353	0.639463949	0.527681791	0.374123728	0.167381128	-0.010528577	-0.121576014	-0.295071837	-0.488415704	-0.620420568	-0.649136352	-0.672221151	-0.652275231	-0.641531445	-0.665140898	-0.674723643	-0.724909591	-0.715192253	-0.856026179	-0.868167814	-0.893665206	-0.905398923	-0.886222102	-0.874781595
0.095187994	0.188707409	0.300749005	0.411913879	0.451860885	0.541214609	0.660556998	0.737228041	0.766029772	0.816291755	0.928695511	0.948745386	1.006110998	1.001616498	1.044724145	1.053085964	1.011905521	1.007563095	0.999916343	0.957071493	0.878461669	0.906310936	0.790377264	0.757306386	0.642837843	0.611443679	0.487859365	0.426273608	0.274240381	0.211560346	0.101152944	-0.025668977	-0.106005238	-0.218523948	-0.313668409	-0.37061673	-0.50051492	-0.555092967	-0.620177687	-0.778586395	-0.820053248	-0.901170762	-0.927585	-1.019286872	-1.079327029	-1.03548469	-1.081861862	-1.107806821	-1.111589839	-1.021453447
0.095950562	0.195173713	0.234490588	0.362323222	0.459754463	0.503253082	0.712667859	0.692376413	0.766214858	0.886634932	0.890288149	0.927564801	0.965387257	0.981955314	1.007163266	1.037934175	1.042672163	1.020630319	1.017939976	0.998845418	0.965316325	0.821559066	0.781841728	0.795854879	0.593958883	0.574155944	0.53140418	0.403327563	0.306906542	0.26755173	0.027242205	0.018072839	-0.096676423	-0.212003976	-0.369270836	-0.44455968	-0.523227461	-0.549145018	-0.665863481	-0.700017643	-0.848676186	-0.851762781	-0.931808698	-1.000366942	-1.066965049	-1.06387497	-1.023573686	-1.072091618	-1.090272733	-1.041701954
0.049612822	0.203808318	0.258513317	0.394934405	0.454006009	0.605438745	0.654583379	0.730642785	0.754742751	0.835355701	0.892238305	0.965369139	0.982557052	1.05487802	1.00454295	1.01058435	1.052082084	0.995336175	1.014463585	0.958928306	0.888918809	0.860417919	0.806609569	0.7051025	0.695002802	0.571453177	0.509092975	0.384251139	0.32897916	0.122409703	0.085548588	0.083186451	-0.072309514	-0.219259538	-0.289197793	-0.428971247	-0.512814974	-0.611388945	-0.696147358	-0.765216021	-0.807041044	-0.895589546	-0.965557238	-1.022774164	-1.012478699	-1.051877514	-1.015174868	-1.081036528	-1.06778961	-1.032134991
0.117086642	0.183124065	0.255250665	0.402943257	0.515536699	0.553898384	0.635942718	0.704532488	0.755634815	0.82202339	0.909324326	0.922958209	0.971689706	0.97393045	1.006971023	0.962091107	0.99532264	0.97317084	0.968183955	0.934167405	0.88479316	0.847627801	0.77996161	0.714841442	0.6093706	0.541903772	0.432979724	0.384414902	0.300351827	0.209632018	0.093765746	0.003600062	-0.102400326	-0.166593557	-0.265775528	-0.384016763	-0.438022963	-0.53789068	-0.639840139	-0.739784329	-0.796195692	-0.842277976	-0.882156885	-0.928113501	-0.946389816	-0.990498195	-1.016215589	-1.01994495	-0.996375734	-0.98971894
0.270944382	0.468150891	0.609060609	0.662627631	0.618314989	0.617654053	0.561214934	0.603456515	0.701313125	0.75682052	0.878121587	0.930767176	0.911888269	0.923239556	0.887411479	0.847893551	0.917912698	0.887620259	0.868298285	0.954296224	0.877820928	0.767691782	0.677827804	0.620502153	0.556330533	0.598591595	0.615678228	0.658093927	0.598433249	0.478412684	0.251519614	-0.004593029	-0.255758978	-0.461117196	-0.634656675	-0.659727364	-0.638001182	-0.601050626	-0.573806306	-0.601880463	-0.666970067	-0.790189241	-0.857799547	-0.95625306	-0.912787341	-0.864900861	-0.869351318	-0.845101225	-0.854675095	-0.888691161
0.078102909	0.21190624	0.32324122	0.387902842	0.472928114	0.561268559	0.629740629	0.744894243	0.702818819	0.802841089	0.88710972	0.902738962	0.978897718	0.991523721	1.022483202	0.979793368	0.986344381	0.953301751	0.978658662	0.898851912	0.88929841	0.863181078	0.751849778	0.689301989	0.635328899	0.593237225	0.465743947	0.352242371	0.290743185	0.206398466	0.135710648	0.014810849	-0.106998802	-0.20120909	-0.275517785	-0.34534018	-0.452739406	-0.57046158	-0.631298344	-0.685817634	-0.777060505	-0.861126103	-0.848817772	-0.897125672	-0.95928984	-0.957562585	-0.992769231	-1.022543904	-0.99562768	-0.981097397
0.10086455	0.147254015	0.3083762	0.381130395	0.458350959	0.558534992	0.629140565	0.710430441	0.801475107	0.886521819	0.868154415	0.930475026	0.984385946	1.008336327	1.005234891	1.025533081	1.039503428	1.049030916	0.997526148	0.9334062	0.920432868	0.86478817	0.788622944	0.741603079	0.673235522	0.549454376	0.505800933	0.410505797	0.308755984	0.198052356	0.10342699	-0.011600302	-0.114036059	-0.191634949	-0.328067304	-0.412629722	-0.47199154	-0.61106038	-0.66769537	-0.741930635	-0.820676931	-0.898720898	-0.922887777	-1.002562413	-1.024012028	-1.050261792	-1.077250694	-1.099600904	-1.050800295	-1.07163138
-0.524184074	5.104888012	2.79076118	-0.414655516	1.476519331	7.124126116	-0.041678192	0.812693741	8.193848437	-0.08643986	-3.774360102	1.228279683	-7.693829278	-1.307500191	-3.035792383	0.456695854	1.557719756	1.469517386	-0.656895171	2.388404709	-3.064461726	-2.317650732	8.036960491	-2.133982719	8.40634909	6.070408647	4.401978098	2.708429959	-0.578760682	-0.540256964	2.997529632	6.191967336	-1.427965738	-2.33935269	1.346878371	3.380476936	-1.67164406	-1.177490944	-8.899260812	-5.737640314	-1.440212793	-3.510894251	-1.418432626	-5.121453001	0.422214067	-1.684756648	0.496577045	-2.780495272	-7.375258917	0.496403524
0.072717377	0.23969208	0.516060057	0.649395865	0.765194726	0.678391067	0.498905574	0.45752274	0.615591042	0.868225742	0.997840898	1.007800159	0.963705687	0.881494764	0.897310957	0.865747178	0.845952472	0.835113663	0.940103087	0.990807613	0.997908515	0.85683054	0.647559762	0.447609578	0.492148007	0.678155115	0.741230238	0.677102859	0.486558128	0.249820356	0.076102676	-0.007531655	-0.06127686	-0.265824668	-0.493652961	-0.675585117	-0.739800255	-0.703958942	-0.495643675	-0.43647569	-0.639261476	-0.857351579	-1.01957526	-1.005630219	-0.923973038	-0.90248113	-0.861298528	-0.890503543	-0.8747238	-0.879035252
0.105818357	0.176504603	0.351875214	0.350030736	0.424437674	0.521073167	0.633540691	0.654259267	0.81302221	0.812000129	0.882145012	0.944157196	0.932574988	0.960048076	0.994437681	1.043190252	1.000832255	0.990031461	0.941153295	0.957811165	0.876962448	0.852132688	0.786273786	0.650986938	0.599271301	0.578629231	0.504373937	0.411508421	0.266522992	0.203631535	0.129341955	0.00682596	-0.166796019	-0.170041666	-0.334014346	-0.358055306	-0.496733628	-0.540317644	-0.606334039	-0.680456999	-0.789565822	-0.890116596	-0.89809402	-0.936464489	-0.916279524	-0.966796701	-0.971367875	-0.958922581	-1.013764072	-0.94997076
0.223709582	0.477261413	0.596126023	0.609803351	0.632643608	0.582506857	0.571836416	0.568563628	0.654975833	0.811177373	0.86992949	0.916044171	0.936343664	0.952710147	0.867026947	0.874408502	0.911662785	0.890025871	0.930157257	0.887061789	0.877048671	0.819233712	0.699288429	0.602115471	0.59114811	0.568732739	0.612668221	0.630314935	0.606299392	0.444520344	0.231982789	0.008206468	-0.275040556	-0.410892852	-0.600818817	-0.616354618	-0.562452134	-0.549170388	-0.58980937	-0.610957505	-0.669481971	-0.79944285	-0.849698878	-0.900087722	-0.906655877	-0.916350721	-0.837618882	-0.87863419	-0.912004658	-0.911072724
0.114061807	0.155720538	0.281241059	0.393835168	0.458075327	0.530698069	0.597252119	0.668214177	0.774403665	0.874361193	0.930807073	0.929112223	0.962726718	0.97988907	1.024387584	0.99956002	1.063020591	1.042603773	0.967452948	0.934820514	0.912365456	0.838423739	0.804342048	0.728439365	0.665884056	0.587080331	0.487512185	0.429370539	0.315708259	0.187137185	0.079691202	-0.006698477	-0.105147994	-0.189434034	-0.303263158	-0.414008457	-0.530963902	-0.606678586	-0.652443824	-0.743145611	-0.774148231	-0.845990699	-0.968296692	-1.024828585	-1.07891939	-1.083123776	-1.056682138	-1.076072701	-1.061745498	-1.049414542
0.054454661	0.180765553	0.340822611	0.478191929	0.569170651	0.556668155	0.453540005	0.286525239	0.129416234	0.017964389	0.003147436	0.109078965	0.250114797	0.405640374	0.540511756	0.576349527	0.521293175	0.412851424	0.258380726	0.116395836	0.0083923	0.034833733	0.136017265	0.28609981	0.45138727	0.541400678	0.577858251	0.480976842	0.337834276	0.180788345	0.048605211	-0.003735341	-0.046830661	-0.182815642	-0.327455629	-0.495300683	-0.57378327	-0.544731732	-0.46900905	-0.294583602	-0.135399837	-0.037103951	-0.007408554	-0.086704069	-0.218820798	-0.399148636	-0.539516176	-0.591644946	-0.553841312	-0.40152389
0.087851148	0.164025804	0.338295705	0.376851481	0.449332165	0.558852141	0.615257484	0.678557401	0.734633739	0.799585704	0.884277162	0.936528783	0.937579768	0.968864005	1.00033587	0.991191757	1.023236449	1.012789196	0.957785375	0.93008255	0.860386825	0.821603321	0.824966231	0.760104288	0.637908477	0.588541564	0.424951115	0.362719821	0.280683691	0.160568481	0.100682457	-0.003540417	-0.12899953	-0.153698683	-0.273036761	-0.40493683	-0.469068311	-0.555952917	-0.636079564	-0.672551274	-0.744853421	-0.85978495	-0.857153454	-0.934867968	-0.956483272	-0.958923547	-1.003079301	-0.987298876	-1.006750335	-0.977819635
0.103021344	0.256929195	0.506354487	0.672835051	0.774094007	0.697075959	0.500273641	0.455321162	0.655983404	0.876354505	1.025658083	1.03643462	0.945849376	0.923527015	0.90158346	0.875073162	0.883871768	0.91370775	0.945131415	1.007764097	1.029518243	0.878360483	0.614499424	0.455481173	0.521453651	0.657580268	0.753134336	0.646051353	0.483214704	0.276690229	0.095837225	0.026360691	-0.06236694	-0.279547066	-0.500549839	-0.670008372	-0.762689439	-0.677561173	-0.522632229	-0.447966417	-0.632980987	-0.925364018	-1.009787896	-1.032727935	-0.956395034	-0.936342891	-0.901871565	-0.898458928	-0.900167573	-0.912173527
0.11879344	0.187388543	0.292911784	0.347414882	0.45847437	0.569210681	0.651677564	0.707204472	0.761043294	0.829242634	0.875063115	0.935098287	0.977756333	0.941547633	1.005784886	1.006865968	0.989272298	0.995357108	0.941286611	0.925136495	0.863588296	0.853246816	0.74959134	0.721631382	0.628713765	0.542062821	0.457837376	0.400087915	0.291177441	0.199969376	0.095654378	-0.00274298	-0.132880274	-0.19047377	-0.267687057	-0.395895217	-0.491276795	-0.516386566	-0.648836243	-0.696638199	-0.778858694	-0.816279446	-0.869684376	-0.928994179	-0.96366711	-0.966574959	-0.948954437	-0.976925375	-0.987605687	-0.991551133
0.074097727	0.23434324	0.452280529	0.676082922	0.738669827	0.649528227	0.523430602	0.433431199	0.631740327	0.859259868	0.964168731	1.007688908	0.928979029	0.861798945	0.886297244	0.882673295	0.858132112	0.85562607	0.93336187	0.994819437	0.970351495	0.859889346	0.652223299	0.426645631	0.473289225	0.682292828	0.76209872	0.689047209	0.521366614	0.255872626	0.087549613	0.006049225	-0.050490284	-0.274188557	-0.474680755	-0.697091183	-0.724103343	-0.67378076	-0.491086735	-0.448560502	-0.620017252	-0.870091945	-0.995047858	-1.031399981	-0.946436729	-0.851115084	-0.848785458	-0.867270499	-0.864103838	-0.884450251
0.086803572	0.177252648	0.312367211	0.391143134	0.467580134	0.545190593	0.649901895	0.72084852	0.779817424	0.836106001	0.892212279	0.930544858	0.952773774	0.999759172	1.020776493	1.024887165	1.00485046	1.032659924	0.984882998	0.935669192	0.890576637	0.876001926	0.822642429	0.724644995	0.657395483	0.554944677	0.49860179	0.393699113	0.334069578	0.225324174	0.117542159	0.032916708	-0.089987059	-0.182241521	-0.282610567	-0.3859033	-0.546927116	-0.581895959	-0.707995316	-0.754953182	-0.800956526	-0.93665292	-0.953715629	-0.991218554	-1.013319017	-1.088029225	-1.118192902	-1.079843355	-1.079526144	-1.059809348
0.031059375	0.085655074	0.208372894	0.289381754	0.386149443	0.442089738	0.457925668	0.457450456	0.472497338	0.478973632	0.564883335	0.62261666	0.72378912	0.829461339	0.913627909	0.922715926	0.905648256	0.824760233	0.745181785	0.644733399	0.593391628	0.486416375	0.435183033	0.436854959	0.481829712	0.424842251	0.357663089	0.326391356	0.206371502	0.106451771	0.034489711	-0.028920461	-0.049132023	-0.101426435	-0.206965404	-0.295455335	-0.415038491	-0.482084806	-0.486884455	-0.445926271	-0.526446581	-0.497357181	-0.570330501	-0.598210578	-0.750370318	-0.844679738	-0.923279323	-0.949439304	-0.873581802	-0.822303503
0.093199765	0.187795971	0.264141369	0.414126903	0.448264477	0.514609912	0.650802546	0.703588562	0.819282181	0.815024312	0.878664628	0.940436297	0.940285894	0.964600688	1.015988512	1.018796458	0.967816328	0.961160026	0.974526333	0.888344234	0.90142839	0.837039162	0.781808174	0.686080542	0.369178295	0.555702044	0.498581603	0.370625754	0.304765272	0.150148131	0.104271228	0.009555101	-0.072901514	-0.190909325	-0.288329283	-0.424540145	-0.498904014	-0.576740862	-0.67122408	-0.727835378	-0.808024363	-0.814124212	-0.886165355	-0.96593585	-0.938178693	-0.983069851	-0.996643575	-1.002126239	-1.008311863	-0.969737899
0.25252713	0.460214233	0.557224941	0.633749082	0.614405263	0.589913478	0.54537262	0.614793911	0.668859018	0.787764916	0.910950177	0.898604406	0.945122524	0.91752403	0.881607966	0.847839317	0.883636928	0.912797979	0.944822173	0.9174673	0.840487164	0.821242383	0.691380278	0.637210674	0.567160687	0.571835421	0.64293525	0.631187084	0.570398579	0.483723366	0.285152734	0.001494066	-0.254627347	-0.496715804	-0.602564253	-0.623626979	-0.630517485	-0.603516171	-0.536199987	-0.59293826	-0.723736593	-0.778458599	-0.879043502	-0.915080467	-0.899356607	-0.900890341	-0.868677792	-0.855101272	-0.903766848	-0.89432259
0.114260759	0.209792088	0.288549266	0.375458338	0.45991963	0.547640114	0.610339943	0.692037292	0.751550037	0.84399892	0.85934851	0.882328583	0.974699327	0.975699622	1.014472171	0.995370767	0.988442639	0.968856771	0.961485419	0.919384986	0.881121123	0.842210111	0.764338783	0.699866574	0.646822565	0.572952936	0.484855838	0.372648526	0.278783415	0.181972699	0.089924497	-0.011820056	-0.106061016	-0.170689599	-0.299868363	-0.371873291	-0.482104774	-0.541073167	-0.59489753	-0.724296818	-0.791093759	-0.843481602	-0.89899825	-0.919913315	-0.956977998	-0.975069936	-1.029612919	-1.00670983	-0.991609397	-0.966941073
0.114006992	0.20305586	0.241902011	0.379638357	0.492606244	0.53382171	0.635465751	0.740151389	0.771455206	0.828300531	0.946321424	0.926205497	1.01201666	1.036617968	1.06244847	1.052838653	1.043100018	1.020849423	0.99928842	0.889423652	0.930400902	0.857546603	0.823137404	0.681277302	0.643658525	0.543831278	0.528456252	0.395659831	0.284218438	0.17423417	0.148931305	0.001893996	-0.11516997	-0.16805207	-0.366680586	-0.401457823	-0.459181329	-0.5713001	-0.673302783	-0.790207965	-0.832388165	-0.909185777	-0.960199226	-0.96202542	-1.023429835	-1.051926883	-1.06417492	-1.085435683	-1.107369801	-1.063847385
0.085661568	0.205154652	0.303039684	0.372125838	0.46802695	0.559565498	0.641116323	0.668329278	0.792058268	0.840171147	0.887547366	0.922277309	0.939587721	0.977361701	1.021874351	1.011085661	0.979011466	0.974084247	0.948190903	0.923692457	0.902985661	0.834624302	0.74725882	0.72018774	0.636196872	0.533765097	0.476861301	0.365418638	0.296552993	0.187171445	0.106210808	-0.005019293	-0.10035892	-0.206289559	-0.291465605	-0.391716752	-0.45510514	-0.571978198	-0.655290536	-0.719269201	-0.786874819	-0.826780183	-0.877074244	-0.90363476	-0.950178033	-0.957970099	-0.978518336	-0.982890772	-0.977493504	-0.964486547
0.266193241	0.414112338	0.474826052	0.567341044	0.544406992	0.584781482	0.6247845	0.663690366	0.707688289	0.791646806	0.880824131	0.913600266	0.954310742	0.929764997	0.906252099	0.899338472	0.89636617	0.933423062	0.910022951	0.941786939	0.850793697	0.800940723	0.737198519	0.672737751	0.582447306	0.624245039	0.57463079	0.577271226	0.468936994	0.357706207	0.238567546	0.021696769	-0.19488268	-0.366161693	-0.503449443	-0.614185281	-0.599253543	-0.592203051	-0.556085192	-0.645183316	-0.717977652	-0.798532879	-0.898877064	-0.94033807	-0.888590533	-0.938141581	-0.925303518	-0.888133573	-0.901364186	-0.89969136
0.101699026	0.170977973	0.294443973	0.382372945	0.498478908	0.537572668	0.623842515	0.701139559	0.767562065	0.808676405	0.9242764	0.915010765	0.9776388	1.039872879	1.062210656	0.995385318	1.053717782	0.995741194	1.012198674	0.949916639	0.897095514	0.86617861	0.825744015	0.751289284	0.695275718	0.603036408	0.509603289	0.462571993	0.288363442	0.175962343	0.119145107	-0.013858999	-0.129383725	-0.193535937	-0.292539337	-0.450513661	-0.481011489	-0.558854127	-0.671183045	-0.763539992	-0.795901516	-0.899332169	-0.918118628	-0.970511543	-1.021881823	-1.046347663	-1.080817738	-1.056157678	-1.074967804	-1.059293684
0.162230272	0.402312196	0.503631737	0.629481669	0.681981294	0.726734488	0.718349522	0.679866761	0.709568801	0.712438236	0.759088887	0.842023156	0.859529446	0.941175376	0.979937768	0.997263101	1.014714099	0.917202191	0.848440507	0.831182084	0.78066622	0.746064216	0.71306264	0.689676106	0.718963689	0.697050686	0.701969221	0.649820266	0.565471591	0.381997345	0.223216369	-0.007734364	-0.216972397	-0.386782021	-0.528602738	-0.591644341	-0.6437421	-0.655428659	-0.669722802	-0.660555137	-0.668867674	-0.655711789	-0.667015789	-0.746817427	-0.7673675	-0.873556491	-0.895033979	-0.88356675	-0.886270269	-0.844722847
0.082776255	0.177679932	0.319752322	0.391376197	0.492618405	0.559021912	0.649848372	0.713532492	0.776705447	0.799268641	0.883799077	0.94376504	1.023893945	0.981359972	0.998559464	1.012827033	1.004974793	0.999368697	0.970063247	0.94198736	0.942209025	0.880322074	0.838397657	0.709148725	0.68917298	0.537836466	0.482315235	0.384832768	0.296613174	0.185197725	0.110176637	0.039440882	-0.106072731	-0.245403274	-0.313435382	-0.450274894	-0.51212881	-0.56167792	-0.646602242	-0.734784405	-0.830986458	-0.853452089	-0.948373618	-0.975996692	-0.980512042	-1.016759117	-1.097378063	-1.103171863	-1.054599632	-1.057190338
0.053304933	0.237520727	0.462901337	0.631260066	0.665106538	0.585959826	0.377766324	0.332292072	0.467462867	0.712008537	0.830717814	0.822230935	0.735605524	0.679057813	0.695024885	0.684509075	0.685832876	0.697828936	0.723387965	0.823961014	0.799623538	0.728873009	0.493033087	0.352329164	0.442989859	0.596401247	0.657721959	0.617850408	0.428246089	0.264574539	0.129517433	0.006876567	-0.079052104	-0.270079285	-0.443676544	-0.63279202	-0.667016971	-0.576384583	-0.361631938	-0.326269294	-0.444895751	-0.702217937	-0.887478885	-0.847659238	-0.779248422	-0.685322811	-0.664534224	-0.625895547	-0.644495319	-0.684088678
0.042226571	0.166790827	0.299778301	0.468743148	0.527833825	0.57164609	0.466117279	0.392129059	0.221261369	0.14913428	0.151448794	0.235097012	0.372199837	0.512197847	0.680317307	0.695309427	0.651691001	0.545244783	0.395450392	0.211262571	0.151612579	0.172085885	0.190325244	0.322748254	0.462990293	0.562804797	0.544770863	0.484647966	0.32753897	0.142616599	0.017815188	-0.011642407	-0.066736776	-0.146262876	-0.306664306	-0.475081508	-0.529471917	-0.526057628	-0.474105979	-0.391812029	-0.209758545	-0.122824863	-0.17051085	-0.205866706	-0.386059679	-0.524640098	-0.654718808	-0.704923819	-0.644802368	-0.526682354
0.059494598	0.192024485	0.346092795	0.504066673	0.590486255	0.570013277	0.416155778	0.196366927	0.00868626	0.170529645	0.18394673	0.119217564	0.052955034	0.215613538	0.339146774	0.389384896	0.334794232	0.218892256	0.047559637	0.118872217	0.167152224	0.17405653	-0.015525196	0.210406253	0.403968383	0.532281002	0.595624583	0.513069154	0.353828705	0.183931216	0.028258206	0.02691017	-0.05222967	-0.188800517	-0.361653407	-0.511529061	-0.586533784	-0.568725378	-0.404642232	-0.207069177	-0.009461642	-0.138653281	-0.167344087	-0.101245518	-0.066461284	-0.201585991	-0.335595402	-0.414604836	-0.354644691	-0.213809452
0.033595013	0.100444269	0.255176899	0.370043638	0.474255864	0.490509653	0.463697455	0.443263339	0.380831238	0.37300783	0.397736538	0.49968888	0.606274827	0.759574274	0.792657875	0.86894903	0.843092858	0.727207838	0.602583197	0.501327245	0.402336794	0.359181325	0.412463676	0.437968017	0.489076635	0.508931719	0.446929277	0.370330403	0.251887467	0.139375636	0.030964652	-0.007779244	-0.01275067	-0.129513858	-0.248476078	-0.373520975	-0.480109205	-0.501038599	-0.487028805	-0.426414644	-0.395719676	-0.355946115	-0.383035066	-0.493254771	-0.59603321	-0.757497912	-0.834289197	-0.860663529	-0.831948598	-0.716530501
0.054909692	0.198313286	0.396730857	0.504502261	0.543222677	0.483946469	0.295704758	0.076021534	0.289559646	0.485729252	0.573791117	0.552691149	0.412429403	0.246381593	0.182802779	0.160270712	0.17254907	0.259995105	0.420417763	0.547210839	0.562173	0.48474802	0.30603182	0.102431302	0.282719337	0.474735702	0.552312573	0.515010053	0.337573649	0.214295384	0.05316238	-0.005241886	-0.055872686	-0.182405343	-0.371836895	-0.496694299	-0.55464941	-0.499382978	-0.272092833	-0.086593945	-0.284261719	-0.46228007	-0.557473187	-0.51663963	-0.410801037	-0.269277946	-0.160963713	-0.154999064	-0.168207738	-0.270584275
0.120957558	0.221434323	0.281157822	0.384695549	0.48724033	0.545127594	0.640782719	0.666178141	0.785919995	0.826316272	0.893972933	0.88996427	0.963561622	0.975393157	0.992358228	1.01236559	0.951708999	0.995017638	1.000579661	0.948496783	0.85126716	0.835461947	0.800059206	0.667939219	0.925833682	0.569090952	0.451001798	0.385453869	0.272487542	0.207582418	0.100264612	0.006368514	-0.110143206	-0.189640473	-0.304643814	-0.371115092	-0.460779635	-0.521369597	-0.659194429	-0.724470769	-0.775324738	-0.795610566	-0.844604522	-0.907075359	-0.983247467	-1.023604409	-0.991526274	-1.019513694	-1.02196525	-1.00214164
0.06428561	0.183383766	0.26433165	0.398071498	0.456048737	0.562914339	0.644086329	0.705149603	0.766701592	0.840592924	0.913590775	0.93896043	0.939467874	0.950891571	0.987025965	1.019755791	1.028548557	1.000557547	0.946876503	0.933115854	0.856654736	0.852296985	0.819662841	0.699384228	1.076132038	0.601111329	0.470090612	0.395884972	0.281067911	0.179298222	0.128186768	-0.046660728	-0.103061084	-0.201349818	-0.278311257	-0.367106838	-0.486429166	-0.536344183	-0.634561335	-0.667418975	-0.768475831	-0.806197416	-0.92286617	-0.939101966	-0.963642857	-0.955090896	-0.988244957	-0.990748223	-1.000566121	-0.999718395
0.053702331	0.186146891	0.290713875	0.385241039	0.487964111	0.581132815	0.633550115	0.729808337	0.755107324	0.795209756	0.859672009	0.944650208	0.991983879	0.996605388	1.010489456	0.98073027	0.984200351	1.01321963	0.947797769	0.926990775	0.841747447	0.827223255	0.746992473	0.744691897	0.599443921	0.546371423	0.459729453	0.385098371	0.265294739	0.251674796	0.092768266	0.015025085	-0.10843992	-0.208463845	-0.336677622	-0.421787626	-0.456838267	-0.551868367	-0.637763861	-0.693571026	-0.767027318	-0.844337213	-0.873312813	-0.902360152	-0.946203307	-0.966664732	-0.942044781	-1.000565535	-1.015206197	-0.95946141
0.112239046	0.192263099	0.281142358	0.358622943	0.438179827	0.5571512	0.653340696	0.703949181	0.762798148	0.830846682	0.874721771	0.905832259	0.952599117	0.99890283	1.010214606	0.993187513	1.036138919	0.980750856	0.969358854	0.919524026	0.857427205	0.832457951	0.735503539	0.681451928	0.602522282	0.541083689	0.492933344	0.388958274	0.309591158	0.22049316	0.085804639	0.011142287	-0.071747299	-0.239063045	-0.305549707	-0.390869556	-0.455611521	-0.564055152	-0.642668646	-0.710199829	-0.73948403	-0.853847273	-0.840759229	-0.908499884	-0.97194609	-0.974965776	-0.990497856	-0.992511181	-0.991432181	-1.005871822
0.010753979	0.068893853	0.163677991	0.275870465	0.368511806	0.416435891	0.441868183	0.469357611	0.473469147	0.539616064	0.607187611	0.639034917	0.757326384	0.849382464	0.920873186	0.941750253	0.930768005	0.849953233	0.73988237	0.662416681	0.596835882	0.520805432	0.476288835	0.420929122	0.477738189	0.459775123	0.386181544	0.313839311	0.192265011	0.123159177	0.033897868	0.034752145	-0.01615032	-0.097101012	-0.166457598	-0.306862007	-0.36200879	-0.44922352	-0.483728651	-0.450716811	-0.478040336	-0.515630232	-0.552369621	-0.651536294	-0.720532749	-0.805735269	-0.914124638	-0.954575385	-0.928706356	-0.817047584
0.112710462	0.205900835	0.313565416	0.38189494	0.465238232	0.562350889	0.659720601	0.722027992	0.781235742	0.830271113	0.880775948	0.913192233	0.951015037	0.997675293	1.017750762	0.971645735	0.990656037	0.968338568	0.897457324	0.971127383	0.881970185	0.837322412	0.762884262	0.678817504	0.64366148	0.59716688	0.46106337	0.385738518	0.303298447	0.214279695	0.081840227	-0.032619071	-0.046695818	-0.208689987	-0.315722876	-0.413333833	-0.438512966	-0.559902643	-0.583437914	-0.700003409	-0.806352867	-0.807466967	-0.90311241	-0.89226515	-0.971816026	-0.975278873	-1.00196999	-0.985809454	-1.024799649	-0.983709527
0.078424759	0.186411463	0.313928792	0.376136908	0.438311362	0.566517759	0.633443324	0.692546527	0.7574818	0.819775146	0.926929521	0.917040071	0.95999967	0.96936372	0.955824057	1.028168312	1.003155451	0.993936323	0.961904308	0.876573143	0.870623536	0.826650673	0.749317817	0.727254579	0.637006799	0.558796212	0.470130513	0.368591025	0.302315266	0.175658928	0.09722003	-0.003492663	-0.092246678	-0.185903687	-0.285248172	-0.420655269	-0.446415821	-0.578019237	-0.659533935	-0.698263044	-0.735603885	-0.819885329	-0.895891587	-0.936497254	-0.973158529	-0.966105183	-0.951531992	-0.974181332	-1.024019082	-0.998505019
0.098796514	0.255537757	0.293696845	0.429770679	0.466330198	0.544968279	0.575819455	0.734414193	0.819947716	0.788724817	0.918654985	0.917481055	0.935638273	0.979575992	1.009597317	0.998077668	1.001162546	0.996771197	0.936440387	0.922005483	0.939251585	0.809826893	0.779805976	0.66862313	0.611936666	0.548861312	0.425847448	0.364075887	0.332245303	0.224579173	0.101999196	0.004123327	-0.106223331	-0.185516068	-0.306156469	-0.393027755	-0.451567165	-0.589499445	-0.623883052	-0.717656207	-0.826026303	-0.838442091	-0.887373901	-0.920897626	-0.968274722	-1.022916676	-0.98357368	-1.009904313	-0.994045933	-1.037028514
0.111353693	0.197926809	0.272973701	0.350060563	0.498049842	0.536604466	0.621626619	0.695474092	0.797221342	0.813661042	0.881797051	0.938423471	0.971168144	1.02808431	1.004141213	1.013946944	0.98083359	0.996702635	0.950185961	0.925255963	0.910246326	0.850469798	0.786001468	0.701140618	0.642224379	0.520761746	0.466904118	0.36276733	0.304689117	0.197962111	0.099179953	0.00717906	-0.101949254	-0.145672451	-0.305604382	-0.363829317	-0.498447419	-0.552392623	-0.620165127	-0.714672465	-0.763000733	-0.870751618	-0.820176415	-0.92156477	-0.960400745	-0.960838985	-0.999171191	-1.005702314	-0.997627557	-0.974853837
0.152321208	0.172830926	0.28665243	0.381811546	0.438956764	0.520524766	0.604031542	0.730351742	0.736152665	0.797251186	0.875522766	0.933160313	0.999923555	0.974942266	0.97205314	1.028831958	0.967687092	0.99242878	0.937333935	0.962709553	0.906456237	0.820195031	0.776691152	0.693821532	0.599746237	0.562491917	0.495921598	0.384978589	0.274784197	0.250346212	0.086516479	0.010968094	-0.08816499	-0.195827668	-0.313569947	-0.347952956	-0.483157422	-0.560172518	-0.64821438	-0.679269098	-0.728183255	-0.866225166	-0.8676707	-0.927623183	-0.977793105	-0.921297198	-0.959651516	-1.036724213	-0.922198484	-1.021985901
0.109063058	0.183881491	0.307075096	0.382108721	0.473160894	0.542058097	0.599933163	0.716533696	0.788756704	0.849394201	0.873224935	0.922021794	0.946947709	0.998927679	1.001239264	1.003435433	0.977462178	1.003182056	0.943593546	0.928459892	0.903849559	0.808671572	0.77264213	0.700809571	0.64029634	0.553944191	0.445010488	0.370813363	0.297387717	0.189519008	0.08000715	-0.0056465	-0.063057571	-0.189819607	-0.282809508	-0.347635745	-0.475719458	-0.51820269	-0.634245559	-0.715025835	-0.780065777	-0.814238025	-0.875561419	-0.920978153	-0.957222404	-0.986155384	-1.003676057	-0.980064747	-0.984485979	-0.983450628
0.066789384	0.196573787	0.301040484	0.382637633	0.478766415	0.550430039	0.640659473	0.705047659	0.766726109	0.820541661	0.835329443	0.916042812	0.963907456	0.992054954	1.009597148	1.002349424	0.986382986	0.971786258	0.940185571	0.910530649	0.88846486	0.838611046	0.778965873	0.71671373	0.608238728	0.561955107	0.473880746	0.386537319	0.259901344	0.18539334	0.124299391	-0.004978383	-0.085250359	-0.188526588	-0.307680841	-0.391942307	-0.470897724	-0.555924565	-0.624346891	-0.700601682	-0.761576703	-0.858490147	-0.866280971	-0.943256853	-0.959600946	-0.970551358	-0.972498766	-1.016174647	-0.992288778	-0.981793883
0.08834318	0.179940834	0.259064853	0.390982265	0.520365381	0.552379042	0.582376093	0.72455592	0.747883794	0.870783562	0.849733117	0.935853038	0.951007553	0.960464906	1.024093	0.968934012	1.005179988	0.951442323	0.962528202	0.928236927	0.885849519	0.784363968	0.740533523	0.712466891	0.647876472	0.5175609	0.46932012	0.366410953	0.251219281	0.170569707	0.130903126	-0.004940209	-0.070563394	-0.189562348	-0.342914798	-0.438891928	-0.395932697	-0.472886728	-0.662067339	-0.765737095	-0.815478706	-0.860952205	-0.936425298	-0.952827174	-0.986858855	-0.978980706	-0.995219592	-1.00617087	-0.98099643	-0.998974132
0.246575763	0.375671244	0.532995708	0.578812583	0.591624658	0.59159866	0.607745772	0.65746348	0.671037081	0.823494925	0.880329368	0.907276717	0.914285796	0.932263598	0.890609298	0.874298718	0.893763143	0.981115346	0.958891767	0.892378634	0.855046059	0.782100482	0.69851783	0.656532111	0.563767946	0.622935696	0.586604307	0.581171265	0.562155739	0.381238156	0.215518627	-0.052699367	-0.222830735	-0.376386416	-0.493050415	-0.540084359	-0.596373885	-0.593275715	-0.621558373	-0.663896549	-0.727010371	-0.805379983	-0.873554113	-0.926196721	-0.965674105	-0.982241469	-0.895021385	-0.899096425	-0.957365165	-0.929191122
-5.2156372	-10.91970188	-5.154128413	2.683931287	6.22546925	-11.34485419	21.56761203	-29.30716159	-16.69112293	4.148053702	9.555389867	-0.356118951	12.57605094	14.7404771	-13.38813883	3.844017576	-0.804785457	-12.7109929	-1.913553551	-0.605521662	30.16748475	23.05380608	8.742800153	2.348242725	7.127265595	1.960728612	-17.37384643	11.65611926	12.09142869	-21.12055136	10.18925318	-8.26062231	3.394503689	-0.993901587	8.72579783	2.586789219	-8.691405708	-17.63551096	11.8802004	-11.14272133	-11.54067225	-3.038093451	-29.58144913	4.638417159	2.136068152	-26.694216	2.326145397	-0.834284	17.08238331	8.311835315
0.105881316	0.201484201	0.324904484	0.382380589	0.499256215	0.565091452	0.629367361	0.710805581	0.78131655	0.84173991	0.859498597	0.885736902	0.965473964	1.053402942	0.969648246	0.989926361	0.974410781	1.01204211	0.97466386	0.897444312	0.906090379	0.872972678	0.782724441	0.741665154	0.251693844	0.56498647	0.455583485	0.380206165	0.276238272	0.182430671	0.094891729	0.006442435	-0.103510582	-0.219464194	-0.308948099	-0.362306575	-0.50695915	-0.56474551	-0.68189134	-0.713512232	-0.783869585	-0.810999122	-0.883723805	-0.968781028	-0.919479741	-0.984824817	-1.052886856	-1.004795694	-0.975631227	-0.949196088
0.144377119	0.173429049	0.279755508	0.398887721	0.503661125	0.560094982	0.573721774	0.719386488	0.766755798	0.826818456	0.870315292	0.91323988	0.982285322	0.968148123	0.959492318	0.987134765	1.009310408	1.004277242	0.947305181	0.933246665	0.888465347	0.821424981	0.766049347	0.690493673	0.644464164	0.54257738	0.493051539	0.39138178	0.290987483	0.165450737	0.133148906	-0.003862447	-0.11969069	-0.198405263	-0.273696423	-0.415100716	-0.467553881	-0.565915687	-0.635765689	-0.704100334	-0.744118501	-0.818642866	-0.892184225	-0.918581978	-0.933417443	-0.990670846	-1.015480013	-0.969540367	-1.001941234	-0.960621865
0.071062719	0.232600209	0.287088547	0.389346197	0.472900312	0.535829233	0.613833869	0.726584983	0.768176042	0.830620356	0.903029383	0.933003611	0.961598934	0.975873703	0.992835528	1.020148171	0.966703793	0.992093443	0.9586142	0.920193929	0.881078573	0.813915042	0.806742336	0.698772672	0.628363773	0.586923426	0.449244078	0.377593957	0.292048465	0.222600897	0.10335571	0.003620867	-0.088289328	-0.228991032	-0.274094767	-0.365459927	-0.472541934	-0.533477524	-0.637069158	-0.707463979	-0.784019182	-0.828839746	-0.893648107	-0.918907071	-0.952073981	-0.986061472	-0.971926336	-1.015251648	-1.029163255	-0.941170316
0.120599308	0.177051056	0.295433767	0.376923463	0.46238599	0.536503295	0.623771053	0.696571254	0.811657236	0.829920684	0.904968988	0.924170826	0.946821957	0.945411849	0.987705205	0.991463728	0.991678129	0.97072603	0.949635376	0.911715297	0.853692987	0.79785449	0.819399687	0.717849888	0.63838566	0.564114422	0.473385388	0.373163239	0.280813506	0.204271687	0.08858179	0.00808333	-0.094681389	-0.187180416	-0.307605393	-0.404171202	-0.439354384	-0.555230079	-0.633229102	-0.685761954	-0.7668934	-0.822380884	-0.885881071	-0.909601385	-0.932698214	-1.009753631	-1.014025127	-1.032777417	-0.998779978	-0.998157971
0.125947309	0.161469058	0.282178054	0.372979939	0.472487851	0.554697761	0.594573439	0.710845145	0.708125923	0.802545839	0.909206654	0.890563976	0.949955195	0.973599299	0.981487909	0.944764669	0.974713436	0.963784257	0.928830872	0.888132205	0.934248342	0.818722755	0.75638737	0.668942651	0.645611778	0.54051698	0.406451101	0.361097086	0.291034028	0.223310928	0.104094897	0.015559882	-0.156273485	-0.168978672	-0.311031848	-0.421038198	-0.491741165	-0.560017492	-0.614055099	-0.691300236	-0.805772478	-0.844386707	-0.835069426	-0.932439378	-0.909363914	-0.995617994	-1.004289363	-0.951426052	-0.964516422	-1.010091019
0.081274468	0.193982179	0.289686921	0.362824305	0.460498467	0.548701625	0.686134313	0.749967928	0.813315105	0.852100342	0.898934351	0.935232178	0.972165034	0.992649554	1.003183979	1.016758361	1.014815749	0.961521015	0.960972821	0.910920232	0.896964607	0.833052622	0.794393053	0.713154689	0.667736274	0.561534344	0.497676853	0.370622169	0.346385636	0.185117307	0.071014889	0.008695547	-0.099505522	-0.227059655	-0.296720264	-0.380110447	-0.457445636	-0.581104825	-0.658708597	-0.747477634	-0.821012998	-0.897363419	-0.952344	-0.98786415	-0.978409708	-1.066311164	-1.028275062	-1.085491249	-1.07749537	-1.011288113
0.069233964	0.220720438	0.455664179	0.653084951	0.705697386	0.629777339	0.450682788	0.368898077	0.546981051	0.761320567	0.880726464	0.855074118	0.83160473	0.770418644	0.758503128	0.773405053	0.725666352	0.746435382	0.842947934	0.885144909	0.894512088	0.789970877	0.534964647	0.428953099	0.428042522	0.616579212	0.717429613	0.636664735	0.461261738	0.263501794	0.086038191	-0.015770919	-0.066292371	-0.244353688	-0.429670145	-0.626314927	-0.686719267	-0.631836307	-0.439439377	-0.374439237	-0.504792044	-0.763731734	-0.875418381	-0.877781383	-0.823279547	-0.781957824	-0.765109503	-0.782356755	-0.764120032	-0.752352794
-12.20808261	7.793416911	6.731234582	26.3056145	17.80602502	10.03553627	12.24809528	5.560600686	20.87862269	-4.109283123	-24.65926947	3.464811977	-5.862174844	2.588498799	7.623217097	8.490388147	-20.27467938	-1.285799766	3.021952898	10.00530574	-6.897067703	-16.29837313	9.91535577	15.7403849	30.15321099	-7.644403854	25.08427963	7.117938057	-22.44806505	-4.030970002	7.402608417	-9.724138449	-1.9035803	28.15781161	-14.76698534	19.61680983	2.159632433	19.64530429	16.4945483	-3.503718334	-2.846632841	-3.206451312	18.46128932	-26.62748056	-1.247712252	-13.82694559	30.50018846	-18.47378336	-7.286916614	-25.61945996
0.08578028	0.247594991	0.472659665	0.672273258	0.755951504	0.666776309	0.495376027	0.446452076	0.620208234	0.862217325	1.005395136	1.004628812	0.90228323	0.848859358	0.877350603	0.867558725	0.86094055	0.891019995	0.937727171	0.9843555	0.969514962	0.855564412	0.618802548	0.463118748	0.478646524	0.662415395	0.736926001	0.667956153	0.491434916	0.261574278	0.090968317	0.014468609	-0.084474247	-0.272231005	-0.478707925	-0.685119188	-0.771748583	-0.677312621	-0.493041926	-0.411664275	-0.636151393	-0.815430326	-0.962666645	-0.984643777	-0.923768286	-0.877898699	-0.830535996	-0.874822061	-0.870195563	-0.850309136
0.118847262	0.214558587	0.259916311	0.378011361	0.482276414	0.569438879	0.643153902	0.742120049	0.807178795	0.844282553	0.897185927	0.928290937	0.992972686	0.99992877	1.019057023	1.058947396	1.053833376	1.021632583	0.982721006	0.948593613	0.915245654	0.848071977	0.81318535	0.73188563	0.681330603	0.580787104	0.507983372	0.420937723	0.280523836	0.187587255	0.103073209	0.01674765	-0.075883314	-0.203173042	-0.328853662	-0.390227287	-0.472413108	-0.57577668	-0.658518331	-0.762067549	-0.815005294	-0.888008081	-0.9429017	-1.024618263	-1.049024172	-1.058799942	-1.099421797	-1.083072105	-1.085318364	-1.067243583
0.429252207	0.164608907	1.345195002	-0.286368043	0.084822768	2.408220525	0.695635537	0.272511182	0.855421883	0.051906367	0.799135652	0.399151887	0.114727136	1.084734042	-0.006493746	2.288993274	0.966645856	0.589627609	0.826329726	1.047696444	1.617835459	1.385548102	1.334333965	1.073917733	0.252617812	0.922440696	0.212574659	1.095863396	0.003087255	-0.293313684	-0.191649733	0.62945759	0.600837485	-0.580900892	1.21852926	-0.736358673	-0.306503129	-0.956268575	-0.943237411	-1.066455523	-0.870508122	-0.632964645	-0.00242405	-2.063600008	-1.151032141	-1.052874644	-0.419415597	-1.62518628	-1.803496714	-1.211745599
0.1435847	0.220579965	0.299112475	0.385768908	0.439265155	0.540489435	0.617012747	0.716635144	0.769562521	0.831838218	0.911301829	0.900005201	0.924205762	1.007872351	1.026066703	1.040232192	0.98877869	0.994836916	0.972034691	0.8697116	0.821519346	0.826335383	0.752595131	0.729158024	0.600467608	0.592805865	0.496842405	0.39572496	0.234762369	0.207381064	0.108171213	0.01054661	-0.108992601	-0.149368962	-0.185389385	-0.415491687	-0.442052169	-0.542652024	-0.608979069	-0.650527332	-0.762624522	-0.818676629	-0.840843992	-0.926916052	-0.979829606	-0.986387052	-0.97722918	-1.046056358	-0.918662359	-0.996371566
-30.98684707	19.49190153	17.97569545	10.73256016	11.71043378	-1.856913921	11.48961425	2.396943948	-2.940113278	-33.26702552	5.389769024	-17.65225145	-0.712291484	-13.82953447	9.465458583	23.26852801	57.98109139	18.25533584	-8.488594959	49.68486279	17.34329643	14.82970768	-0.773728799	11.0969566	24.26818458	8.773064893	-11.25800491	-8.931539061	3.035471355	19.74760709	-49.097651	19.35662633	-17.92133123	-10.17160922	5.307574416	-3.13248723	-22.91325023	15.34862432	20.91600028	6.677454382	-13.10026252	-0.887413735	-10.2224427	-21.6707306	-7.819846163	16.91713085	36.67179518	7.908391865	5.039323281	27.91083844
0.060637433	0.189124369	0.328292746	0.338513081	0.491187227	0.545793093	0.626602652	0.734223828	0.7931219	0.834317672	0.911701535	0.910260891	0.978077491	0.976801952	1.014040988	1.012778603	1.009853515	0.97587255	0.908958911	0.928122	0.8847999	0.860238056	0.792820909	0.683246438	0.627122028	0.562749178	0.465963643	0.388191511	0.306122049	0.202233182	0.083501768	-0.001318405	-0.055310955	-0.163433292	-0.284776381	-0.380798161	-0.447736507	-0.583130781	-0.662702663	-0.684990138	-0.794368704	-0.834969876	-0.902508831	-0.902370279	-0.920757929	-0.989074017	-1.000205059	-1.042968339	-1.036742474	-0.988265993
0.090623669	0.174990104	0.283251415	0.384332419	0.494049746	0.539155092	0.625267416	0.708872499	0.788842856	0.822880227	0.850700623	0.908251504	0.973503258	0.97273599	0.968295333	1.004503259	1.015088564	0.952406037	0.944706813	0.929568697	0.911265081	0.834148059	0.739457742	0.734807855	0.987380015	0.550101056	0.495982026	0.391157255	0.29949994	0.1843134	0.123680357	-0.007203659	-0.07063116	-0.199480543	-0.302303492	-0.382988736	-0.483436747	-0.547089152	-0.640726529	-0.670932262	-0.811825535	-0.862464272	-0.878018783	-0.905711854	-0.954035396	-0.963698773	-0.986271394	-0.957858062	-1.011819838	-0.960703293
0.087791286	0.200998692	0.31464932	0.390112725	0.42690626	0.554503782	0.62569428	0.676635561	0.756426996	0.814477747	0.898083693	0.890877324	0.955746934	0.940471262	0.982564089	0.996791586	0.997299605	0.982256156	0.923322212	0.94949653	0.879036158	0.781396048	0.786974495	0.698461248	1.003770835	0.58027039	0.492010214	0.397125001	0.302148249	0.234846269	0.08114703	0.006714071	-0.093168293	-0.176804754	-0.302830437	-0.390098922	-0.530053676	-0.555218012	-0.651417502	-0.720931364	-0.806719832	-0.781226441	-0.865818231	-0.840749995	-0.959068572	-0.994944168	-0.994987934	-0.994337672	-1.007008465	-0.998822089
0.08657352	0.245780131	0.468551648	0.658491587	0.73668277	0.654009023	0.452488345	0.428601774	0.61591147	0.834682614	0.985609655	0.957266192	0.92008037	0.872953969	0.810072135	0.854667934	0.862138286	0.883392625	0.920223141	0.969195434	0.975066917	0.871254874	0.607792387	0.451330856	0.492757708	0.667419739	0.727893628	0.685733539	0.512095845	0.27313009	0.100150587	0.005040391	-0.039103535	-0.24827619	-0.458285	-0.640824238	-0.737156662	-0.665463146	-0.51373809	-0.417431561	-0.610868035	-0.861140676	-0.975278651	-0.997333509	-0.931397638	-0.879996113	-0.890636852	-0.842948496	-0.852708908	-0.866288763
0.203591601	0.346262593	0.526977071	0.577241365	0.652478273	0.693199272	0.679936458	0.71833432	0.739278705	0.736524302	0.786975438	0.902239134	0.911334938	0.995548493	1.025478476	1.02751268	1.017844328	1.007747126	0.966654435	0.905839275	0.818988976	0.776335777	0.731594048	0.738237046	0.720520571	0.702090689	0.636860336	0.60142351	0.485698818	0.344309365	0.16668899	0.041614754	-0.163572584	-0.375597583	-0.43761027	-0.599188012	-0.609359296	-0.709749783	-0.655330246	-0.688110462	-0.666545628	-0.697909458	-0.751876288	-0.770678719	-0.791635408	-0.879544219	-0.92417066	-0.896597967	-0.855786007	-0.865664087
0.070922723	0.190595962	0.296050734	0.393687924	0.500923699	0.534342375	0.666684678	0.659094957	0.807703226	0.818369818	0.911901402	0.917253287	0.99055504	1.017198077	1.029732587	1.070020107	1.021342582	0.994433227	0.988862278	0.956006999	0.902890165	0.884077562	0.815220711	0.743283676	0.668590411	0.575239762	0.487113805	0.414209934	0.285299906	0.237598119	0.076192515	0.038833301	-0.108821188	-0.15898436	-0.281907247	-0.359305289	-0.474137288	-0.620324085	-0.688552769	-0.78536402	-0.820711158	-0.824667779	-0.940641494	-0.981599578	-1.015754178	-1.055151332	-1.035850139	-1.063654523	-1.119581493	-1.0843624
0.116067704	0.167262909	0.300279091	0.361880833	0.47236247	0.539301286	0.614263994	0.715745358	0.810898209	0.842607197	0.867049483	0.929457064	0.968635549	0.980125576	0.99866741	0.96356264	0.973233568	0.985114937	0.954476211	0.880368578	0.897930813	0.846804955	0.748207332	0.694643064	0.985881411	0.544651177	0.479955585	0.401419676	0.325494661	0.179099503	0.111409427	-0.025221315	-0.095524142	-0.202510847	-0.283511161	-0.385978602	-0.467201459	-0.547484452	-0.614076755	-0.721686169	-0.799386114	-0.808970737	-0.868858081	-0.926644124	-0.946978931	-1.024845181	-0.997603313	-1.007448771	-0.988863036	-0.949988182
0.119793924	0.185190727	0.230322639	0.352731128	0.438916077	0.568306037	0.607486244	0.69569236	0.782503095	0.869661386	0.873185596	0.966637702	0.949980308	0.954658233	0.986458132	0.977560949	1.018212694	0.991354173	0.941441149	0.925494018	0.869614537	0.849821595	0.73811146	0.716074429	0.318191893	0.545588989	0.464964465	0.389150371	0.317032195	0.202355543	0.105451015	0.008085836	-0.078041471	-0.149456947	-0.265420137	-0.334319599	-0.471961357	-0.546795995	-0.635144503	-0.67248149	-0.703314245	-0.780058279	-0.884701694	-0.925235335	-0.948466976	-0.979758121	-0.973804438	-0.974380086	-0.996814138	-0.948330064
0.06692077	0.191199181	0.295375246	0.345651086	0.45647833	0.549068711	0.657299536	0.713691186	0.761267174	0.849191346	0.885536189	0.918690318	0.964105432	1.007662023	0.995164242	0.998171577	1.005496828	0.998885055	0.936527153	0.921775087	0.916331827	0.826731672	0.780661788	0.689329994	0.624765007	0.550714311	0.499412299	0.403378077	0.266445937	0.178574779	0.084215116	0.034482812	-0.086363709	-0.230346282	-0.305943812	-0.395280551	-0.476819466	-0.557235084	-0.653622987	-0.678476638	-0.770983566	-0.82702628	-0.874156636	-0.901858722	-0.958616987	-1.003485066	-0.999704308	-1.005121137	-0.999112976	-0.970221978
0.073020635	0.203578679	0.378235064	0.520686217	0.590377241	0.509341853	0.278521724	0.115765863	0.322671719	0.533537254	0.597185493	0.574316645	0.483379294	0.366388783	0.284750576	0.303520112	0.295886743	0.344697894	0.500393057	0.588956949	0.633593697	0.50593025	0.317915234	0.152351904	0.289650188	0.514646318	0.572018158	0.541120981	0.394801659	0.231951106	0.054443497	0.016548804	-0.083594165	-0.231226847	-0.372093125	-0.550407768	-0.564185957	-0.496136448	-0.290712249	-0.180675009	-0.338549463	-0.498680521	-0.623626537	-0.547297045	-0.451024038	-0.332071258	-0.266710833	-0.319461357	-0.328687675	-0.341815791
0.079599237	0.179320535	0.362979261	0.365202802	0.490294085	0.580399661	0.633698427	0.724206373	0.802335421	0.81436616	0.863394408	0.957173162	1.003747422	0.990366005	1.020743064	1.030309111	1.037978435	0.978468045	0.944923977	0.939336812	0.944637947	0.909204555	0.747453838	0.715869236	0.649103184	0.582161683	0.489413571	0.422187982	0.318753099	0.202748299	0.091659357	-0.031262553	-0.148788778	-0.217630379	-0.338208473	-0.378653395	-0.521200015	-0.601033855	-0.670734827	-0.730003817	-0.810632037	-0.863349167	-0.972067226	-1.03710777	-0.979842543	-1.063801627	-1.090026687	-1.058301287	-1.084088019	-1.059622432
0.076475338	0.192114187	0.293608709	0.381051531	0.514998707	0.555356994	0.633672748	0.703819062	0.765771013	0.829573915	0.90208159	0.948518301	0.979643188	0.982709765	1.034604845	1.036640999	1.032360952	1.006458189	0.978245169	0.962152052	0.92440232	0.851879117	0.783942344	0.741833566	0.672626235	0.56615063	0.50645152	0.424193558	0.311765812	0.230700423	0.110262866	0.007870356	-0.110072997	-0.232836903	-0.301113947	-0.427182803	-0.491285569	-0.577339686	-0.66740672	-0.788053944	-0.800024843	-0.904677267	-0.962193703	-1.009742104	-1.053354355	-1.058288433	-1.101567655	-1.106892441	-1.065888575	-1.057094581
0.112162127	0.17525654	0.284597107	0.411594317	0.440730692	0.57275973	0.626464992	0.760392686	0.786975225	0.838412506	0.868992639	0.959322702	0.941097794	0.99240041	0.991479486	1.005010544	0.993135331	0.979632114	0.955403199	0.934979458	0.904923551	0.84608435	0.799092286	0.68934407	0.613157242	0.541937203	0.46732717	0.364855486	0.2754745	0.213444556	0.111762368	-0.002895356	-0.112269788	-0.210573139	-0.26061314	-0.411087393	-0.482693751	-0.563569432	-0.626029382	-0.721697337	-0.762445614	-0.822467194	-0.900697285	-0.928590944	-0.936830649	-0.979641441	-0.996497614	-0.989954473	-1.000023468	-0.989488496
0.03957183	0.184093192	0.389605211	0.536681617	0.570566139	0.46744985	0.30021178	0.155391858	0.334965602	0.501558547	0.616263119	0.587711843	0.481655285	0.367758354	0.296710696	0.254753337	0.308395473	0.314564961	0.461925357	0.557936059	0.627122093	0.5240746	0.312426237	0.140283017	0.306445413	0.466921697	0.570901061	0.505688139	0.408848121	0.183761097	0.04767431	0.028428755	-0.079820558	-0.190432156	-0.405107741	-0.536585569	-0.566132851	-0.481999501	-0.283927012	-0.126074046	-0.30393053	-0.511611599	-0.581941775	-0.603620455	-0.457940248	-0.347486715	-0.295314552	-0.294890448	-0.299685511	-0.351913841
0.275864824	0.4246391	0.548379935	0.591975585	0.583398719	0.56761839	0.561583435	0.592510181	0.720594423	0.805760651	0.874603418	0.940138257	0.936888511	0.933126019	0.857962368	0.90971492	0.891448392	0.924945955	0.92177865	0.9337593	0.855178278	0.800680245	0.730272709	0.642726711	0.571053531	0.564924888	0.601339564	0.599128662	0.583049664	0.411363814	0.23923646	0.009710877	-0.229154419	-0.39430113	-0.547356298	-0.615169988	-0.624683091	-0.528545271	-0.595038069	-0.581166834	-0.718277683	-0.799884669	-0.875930734	-0.954144987	-0.966447272	-0.908988348	-0.911399651	-0.879045685	-0.89014114	-0.924930956
0.110989268	0.210653004	0.295266652	0.38230932	0.470979173	0.558909683	0.637925139	0.731272936	0.77993003	0.861976952	0.882193301	0.926243613	0.962688984	1.009295517	1.068607357	1.025843515	1.007907412	1.011407952	0.986900046	0.954412735	0.925666849	0.847976343	0.777642787	0.738625686	0.668457857	0.596447082	0.486645941	0.409387641	0.304948402	0.22136059	0.099537654	-0.012815339	-0.101766519	-0.195194892	-0.274332147	-0.394307803	-0.507181948	-0.597185602	-0.689930179	-0.727908078	-0.843714674	-0.929138148	-0.960950136	-0.982596264	-1.032561066	-1.03768713	-1.065699465	-1.084837355	-1.110646475	-1.060421714
2.134226226	8.870875622	3.749957023	0.976453006	-2.306981945	5.224364148	-0.814405762	-0.465813453	-10.08809518	-3.643552825	0.211254597	2.083727007	-2.066426299	5.669356061	0.143962366	-0.923233286	0.207226997	3.975397728	-0.01129261	7.278541892	9.337522147	-10.68406841	-4.522326489	1.032286594	3.41949553	2.069968388	-1.082229381	1.384678786	-3.552617556	7.210438937	5.768317955	5.290124834	-1.709933343	-2.609933274	4.492265746	-0.338750139	-3.462464415	-2.112331507	5.092889949	2.653077654	-0.072785098	1.123746681	1.401278124	4.611934932	-4.286360658	-0.68347738	-0.966447512	3.076535453	-5.267195831	-0.926520748
0.116885659	0.183160269	0.300328681	0.391135914	0.478381542	0.570320765	0.676532977	0.708057462	0.775786261	0.859280658	0.920181095	0.904143921	0.95641825	0.997752299	0.995517668	0.986115994	1.01358706	0.945761586	1.015107392	0.924150102	0.866721871	0.832742876	0.784273399	0.716242759	0.378327	0.549224675	0.437305341	0.416646497	0.332726105	0.187435125	0.090437761	0.045746389	-0.142724683	-0.220060863	-0.251786498	-0.410791772	-0.503666413	-0.585843965	-0.628930108	-0.730038639	-0.743804235	-0.859310094	-0.83855318	-0.916320071	-0.967419073	-0.973283957	-0.990898527	-0.981135202	-0.959857675	-0.96529334
0.230638126	0.384167544	0.466487957	0.535140355	0.568076287	0.587771388	0.58158147	0.645959821	0.705003399	0.799702023	0.92784091	0.930378753	0.938726548	0.916477861	0.955438149	0.893498213	0.981588996	0.943329002	0.948366465	0.953691773	0.929810707	0.808750024	0.718833295	0.624176193	0.588014593	0.581098545	0.552314145	0.521850239	0.505662773	0.392372029	0.19128079	0.014437972	-0.208181707	-0.351452158	-0.520520947	-0.546522419	-0.557731603	-0.541604528	-0.587753354	-0.671134296	-0.710710691	-0.753592723	-0.866182164	-0.920147632	-0.956231253	-0.940513623	-0.908709716	-0.88855589	-0.917006293	-0.948531949
0.089136336	0.162243717	0.261309663	0.381848163	0.514504176	0.609751655	0.664953747	0.682899764	0.774260149	0.860003751	0.872207237	1.017491937	0.974680379	1.027838418	1.08212573	1.067866124	0.991649589	1.02449658	0.967508815	0.906516357	0.856113583	0.879275773	0.807474941	0.749585372	0.701571578	0.562008051	0.512492664	0.364556956	0.319745949	0.217525825	0.117899754	0.019159578	-0.069619806	-0.1920141	-0.369765358	-0.401402215	-0.491602183	-0.620815868	-0.632632968	-0.754169667	-0.797279669	-0.900180486	-0.918589773	-0.938215906	-1.071441345	-1.056526361	-1.079218145	-1.101993915	-1.103209636	-1.032144319
0.182111237	0.210048182	0.284186599	0.415334878	0.453405711	0.548926928	0.65269747	0.7032659	0.791232433	0.804800226	0.909253871	0.987741719	0.985801897	0.9908339	1.045450676	1.034720772	0.992818824	1.027562988	0.993487562	0.988038575	0.930178556	0.867972063	0.810939978	0.76878639	0.673071701	0.599411918	0.519470288	0.36824394	0.301206996	0.261374657	0.148047016	-0.013624416	-0.15456324	-0.168259725	-0.352006701	-0.390581575	-0.514582906	-0.632707789	-0.674203423	-0.734190817	-0.818320409	-0.873310537	-0.973758245	-0.976514268	-1.058782303	-1.006708607	-1.076682839	-1.095831176	-1.067334358	-1.03432352
0.091669843	0.226555785	0.411252568	0.603421773	0.638830106	0.559667379	0.421558747	0.277629272	0.467288696	0.674082501	0.777389126	0.753024312	0.654377596	0.618490774	0.596804343	0.617638038	0.587148471	0.624603971	0.686283772	0.804069123	0.80768836	0.688403099	0.483798576	0.279692287	0.338752054	0.568518743	0.628848997	0.619726638	0.432354667	0.229229595	0.065373511	-0.01363977	-0.054105993	-0.201607753	-0.404711057	-0.595557848	-0.639183734	-0.55061567	-0.402072689	-0.291673968	-0.450520659	-0.697810294	-0.768250322	-0.757664448	-0.702404743	-0.633106426	-0.580318875	-0.594322006	-0.597938174	-0.631977288
1.929243377	-5.733609708	-3.487088274	-4.038697085	-1.68893783	6.884255437	0.000168755	7.245680493	-1.224691559	-1.88581581	-1.903497946	9.341646191	3.763089941	1.215840574	4.045559348	-4.564255263	6.114113102	0.771513735	-3.72295439	-2.043279643	-9.72116355	4.580697028	2.468243913	0.091385753	-1.014889337	1.522242424	10.79073558	7.461155972	-7.668600502	5.192768317	0.998652604	-9.941546321	-0.03902966	-3.391813954	4.168399006	-15.03751949	-2.895681911	-4.109148272	8.278512912	5.45773666	-2.973497779	-3.205942874	-3.529135899	2.710208658	1.167215486	0.037750709	5.191901333	12.33310316	-9.49677796	-4.313073518
0.015979655	0.084865179	0.191672192	0.274369657	0.362806771	0.433976905	0.475583527	0.486975881	0.52651181	0.504824727	0.587566102	0.665598922	0.78438522	0.852331159	0.905912291	0.943136891	0.924080356	0.864261687	0.768864073	0.661514402	0.563499047	0.503128274	0.457292339	0.475563388	0.447783403	0.444807621	0.373406497	0.330073074	0.196321184	0.095729835	0.005342104	-0.009659883	-0.036644485	-0.093204124	-0.196547674	-0.305329117	-0.367618244	-0.422967083	-0.460023829	-0.449619619	-0.502988983	-0.509355671	-0.556790667	-0.662865007	-0.761255425	-0.851770017	-0.923193779	-0.943146728	-0.938595989	-0.876170865
0.093159717	0.17012044	0.289373937	0.392169324	0.449952795	0.567235242	0.646781808	0.705193853	0.755009165	0.823354644	0.880020614	0.939646895	0.943759052	0.96620725	0.986401617	1.012135093	0.99092032	1.006265926	0.974340133	0.928673759	0.89780126	0.858542953	0.777734141	0.701697838	0.636142213	0.574576564	0.484668671	0.38391013	0.294079746	0.197106052	0.090065557	0.002290102	-0.117779528	-0.198684145	-0.272634695	-0.365876468	-0.456225736	-0.548780082	-0.629745942	-0.702681194	-0.769967816	-0.81047007	-0.904965153	-0.931328284	-0.965418723	-0.97180015	-0.996469226	-0.999696609	-0.973586071	-0.979646632
0.1313733	0.213435058	0.284513902	0.412894943	0.476844528	0.55790766	0.620643025	0.759706399	0.775082322	0.857000986	0.810376002	0.947704307	0.929532016	0.966873137	1.042410944	0.968736368	0.951257335	0.943764216	0.983952397	0.929446807	0.848697484	0.855301299	0.782966844	0.699141057	0.628289979	0.583192294	0.475536856	0.394999399	0.30957312	0.194052981	0.140126695	-0.041271133	-0.099671014	-0.200387116	-0.248806823	-0.392966681	-0.430780605	-0.575574556	-0.698213438	-0.738889017	-0.73489597	-0.829902296	-0.819412861	-0.902144101	-1.009846872	-0.942592085	-1.017296793	-0.983002664	-0.994430441	-1.049573524
0.076142982	0.180679	0.339574795	0.462924392	0.554031412	0.562807433	0.456963671	0.306873089	0.172412022	0.071535057	0.060576813	0.191043926	0.332757644	0.478551597	0.611369384	0.653212399	0.573367973	0.498115174	0.291648233	0.179591724	0.105233291	0.090049676	0.174019127	0.343709674	0.445297013	0.577870801	0.557574568	0.480064563	0.290600751	0.142965997	0.060603099	0.003064219	-0.035672459	-0.193202642	-0.332246792	-0.483830274	-0.562978817	-0.558864587	-0.458308654	-0.343200497	-0.190458222	-0.095816727	-0.097356896	-0.204604131	-0.316456306	-0.468120157	-0.60632273	-0.65115601	-0.57520432	-0.48051861
0.113842048	0.203626753	0.289537939	0.43153635	0.541739606	0.577796703	0.623995926	0.708624149	0.774588604	0.867157711	0.903653259	0.914499363	0.954693879	0.948404931	1.04500459	1.004830977	0.979643385	0.956899076	0.960291295	0.924276246	0.853279509	0.783272158	0.792754393	0.699376464	0.838162577	0.535736984	0.462846869	0.420858611	0.292919871	0.193740904	0.082176153	0.000534305	-0.108173628	-0.210931946	-0.27157667	-0.403257426	-0.487790602	-0.543982423	-0.592104755	-0.698481672	-0.79443384	-0.827892121	-0.899171492	-0.923275583	-0.950907091	-0.96064699	-0.976175813	-0.997051054	-1.003746008	-0.973037761
0.080373062	0.186304477	0.290938379	0.33786795	0.448204465	0.524915841	0.616736363	0.705698435	0.81346294	0.865444681	0.877429352	0.9126821	0.943209336	0.989410568	0.98976905	0.996798006	0.983058543	0.941756687	0.90712396	0.905862939	0.858098964	0.845684195	0.721019013	0.704147751	0.647315256	0.568280924	0.481071949	0.409316345	0.277541603	0.155950852	0.099302046	-0.018943821	-0.07441041	-0.175856067	-0.287190848	-0.391828126	-0.455197407	-0.569385332	-0.635330449	-0.727200338	-0.775370881	-0.871168741	-0.889313021	-0.958875815	-0.945438935	-0.964890741	-1.015301527	-1.031782202	-0.986745651	-0.98215205
0.158847486	0.409161113	0.541013656	0.642995966	0.698506247	0.695956774	0.713839494	0.718652791	0.719203429	0.728135821	0.787413378	0.834011616	0.89567148	0.917206996	0.995231486	1.012331937	1.029301356	0.97076736	0.906432397	0.827186105	0.76956691	0.746908089	0.718648006	0.730854677	0.690413544	0.694611735	0.684901456	0.651755495	0.531129252	0.425710566	0.196014501	0.009576292	-0.209275944	-0.403037268	-0.503271506	-0.61124952	-0.672716305	-0.620415016	-0.659290724	-0.662625841	-0.682341671	-0.663132069	-0.682878887	-0.743571411	-0.822683923	-0.855512836	-0.858799412	-0.908625304	-0.877632982	-0.836497812
0.113118079	0.217320702	0.305001484	0.389782527	0.45648113	0.576168581	0.624475207	0.723475128	0.790367822	0.843920245	0.862476693	0.910824209	0.960442746	0.945777874	1.006316973	1.001847372	0.979873673	0.98043891	0.951990325	0.90613177	0.914781208	0.828818323	0.808606719	0.733149138	0.329168491	0.541249624	0.491463897	0.39327877	0.278507581	0.214767476	0.06917087	0.00444834	-0.125346147	-0.20650981	-0.28326678	-0.399979604	-0.489526365	-0.510437375	-0.583350362	-0.71421659	-0.772261877	-0.818533866	-0.886796644	-0.911430892	-0.96918908	-1.025241961	-0.984592133	-1.01140803	-1.009628941	-0.977066465
0.006844836	0.232560026	0.263058064	0.331972091	0.504489172	0.486370848	0.665504389	0.729126208	0.747213721	0.826757007	0.896500043	0.988590624	1.102613172	0.957853614	0.996013657	1.037248527	1.075476306	1.017391235	0.960667985	0.97495723	0.846695829	0.850288677	0.735130581	0.663491126	0.676662964	0.518958071	0.461732196	0.36550402	0.245784444	0.236349914	0.072670729	0.05100946	-0.086765079	-0.230514069	-0.275731963	-0.398141227	-0.406626945	-0.59168703	-0.611509257	-0.665283407	-0.719321377	-0.761197622	-0.964383303	-0.909106663	-0.895983659	-0.931810074	-1.003498675	-1.027624229	-0.962717534	-0.944074464
0.112194478	0.21249683	0.296354199	0.367576812	0.464387858	0.551857653	0.629161749	0.700455949	0.773591754	0.804793911	0.904269404	0.924619672	0.9786461	0.972286014	0.976514837	0.989446798	0.986681986	0.998700881	0.960536263	0.899333511	0.88887952	0.869818859	0.784138861	0.734367162	0.634485889	0.557287224	0.47826339	0.381465939	0.315514297	0.1921613	0.104903647	0.012977556	-0.107033176	-0.191843767	-0.297008111	-0.387187153	-0.457044495	-0.537529841	-0.625952692	-0.687339265	-0.779558293	-0.848321603	-0.875490627	-0.91364134	-0.947086352	-1.002094451	-1.024576979	-1.007805217	-0.993368394	-0.999228007
0.07872396	0.17315796	0.282218032	0.345366857	0.453698367	0.557505476	0.622675535	0.686690089	0.770228975	0.787212671	0.892266982	0.935270488	0.965892643	0.994023371	1.051020042	1.046906869	1.014503775	1.0097163	0.953146653	0.943493227	0.925496414	0.889509177	0.820100324	0.719600435	0.67217708	0.598844516	0.509616851	0.426142164	0.298235711	0.200862525	0.135257916	-0.022016141	-0.150290023	-0.188230667	-0.27710259	-0.389491511	-0.476430829	-0.590234951	-0.672876459	-0.735608361	-0.822384348	-0.885099961	-0.907322481	-0.999532437	-1.0382765	-1.106897765	-1.050399854	-1.104985689	-1.083366966	-1.072254042
0.13034723	0.174601166	0.275162475	0.402395769	0.480151888	0.5512124	0.629576546	0.743236149	0.812034312	0.817557376	0.903919721	0.950214279	0.960720626	0.99186857	0.971681897	1.014889416	1.067833532	1.014600873	0.996294723	0.908215194	0.939193217	0.877180508	0.796315438	0.761637136	0.674809154	0.61504129	0.49796725	0.434541893	0.329713296	0.175596993	0.131474415	0.001571306	-0.159154612	-0.233438268	-0.300834841	-0.412607301	-0.503609617	-0.599391695	-0.635858146	-0.74609723	-0.817680153	-0.900563158	-0.953257157	-0.981923932	-1.027556974	-1.077724913	-1.067776773	-1.083168078	-1.057493373	-1.10244035
0.136809642	0.205956031	0.252259588	0.364525105	0.456952254	0.57486327	0.648258416	0.742116081	0.750894377	0.806756855	0.901919987	0.936960407	1.013857318	0.934513239	1.007638799	0.980947305	0.988104025	0.967045753	0.958763915	0.931961488	0.880686816	0.846697094	0.748805458	0.699405218	0.359273588	0.582561251	0.472322766	0.408314867	0.252874525	0.213149766	0.115168747	-0.036031036	-0.112927775	-0.165320817	-0.317344628	-0.376242567	-0.437144611	-0.565456496	-0.638522018	-0.688242834	-0.77476686	-0.837328096	-0.860204103	-0.960297466	-0.968968351	-0.950510851	-0.957857098	-0.986160777	-1.012479489	-1.012910028
0.097153736	0.158797094	0.308179366	0.396062076	0.458201691	0.584732441	0.592506569	0.695677002	0.766072962	0.860360772	0.897145272	0.924791712	0.964216178	0.99368882	1.005100018	1.021306484	0.986438123	0.968580839	0.932180031	0.935204157	0.871806618	0.821689056	0.755924226	0.714744014	0.685985617	0.617425184	0.44762867	0.349509781	0.211896802	0.165438903	0.094543903	0.010279863	-0.041924093	-0.160194114	-0.287053386	-0.41476199	-0.508200928	-0.593868234	-0.642387241	-0.728682738	-0.760836844	-0.870684384	-0.87435341	-0.958841953	-0.915516341	-0.963835819	-1.003209543	-1.048483748	-0.96691833	-0.992438428
0.135058663	0.197765332	0.276807016	0.371094912	0.483426269	0.529997981	0.671196196	0.734310274	0.783451949	0.865803282	0.856635293	0.87439161	0.952609771	0.953266989	0.936084808	1.039753877	0.973555843	0.955980599	0.976166458	0.88573379	0.93926792	0.81818238	0.775466999	0.717906965	0.614378263	0.590892676	0.490690195	0.39346637	0.290920065	0.223867227	0.056184071	-0.018960943	-0.060353624	-0.206814624	-0.280802096	-0.389286697	-0.474344599	-0.579236245	-0.615140141	-0.704324796	-0.750233648	-0.781141806	-0.86935764	-0.880821817	-0.954818186	-0.985611879	-1.006306353	-1.025355015	-0.972951147	-0.935611459
0.094759344	0.144867723	0.275041325	0.362705432	0.45839181	0.569781541	0.610718628	0.696958097	0.815262491	0.811142043	0.841478801	0.92788685	0.929784732	1.022241275	0.985479598	1.018824037	0.997062326	1.000885971	0.944829337	0.917235153	0.857378768	0.819617686	0.776547077	0.691074667	0.635911083	0.56815034	0.512423358	0.356549588	0.302444359	0.175940773	0.113778937	0.047419927	-0.083639809	-0.179448669	-0.28503043	-0.390825326	-0.446246386	-0.536073804	-0.659548348	-0.704195811	-0.771084505	-0.807107354	-0.816055658	-0.910603035	-0.966479122	-0.935607984	-0.992037607	-0.991832759	-1.020139152	-0.949767468
0.105809168	0.18240322	0.262088215	0.378973591	0.450850315	0.566633115	0.627545968	0.701318156	0.818419279	0.868269208	0.866402166	0.946734959	0.926897041	0.99459786	0.953249178	1.00420377	1.001402464	0.989538259	0.955417355	0.922687288	0.89907299	0.844185037	0.791976487	0.668117851	0.624374641	0.562701307	0.485981605	0.39874822	0.298305268	0.234867906	0.112770123	-0.024605224	-0.121445721	-0.191711091	-0.302961813	-0.438172896	-0.439796613	-0.576100358	-0.630036125	-0.698919551	-0.767457352	-0.819959942	-0.878481624	-0.907627546	-0.948024008	-0.975356003	-0.986805887	-0.964674318	-1.020233921	-0.960955752
0.215069848	0.406379893	0.591976874	0.675325677	0.763034207	0.724098042	0.721893156	0.691239465	0.71000516	0.681087798	0.77296926	0.781545564	0.851006249	0.893919087	0.967811649	1.010281422	0.986221504	0.925119831	0.840131296	0.814787314	0.729642911	0.748373128	0.665038515	0.721134438	0.726976318	0.749870207	0.728082636	0.694020288	0.624111362	0.444453422	0.248045364	-0.027485689	-0.18340565	-0.436235053	-0.572563802	-0.650022508	-0.720713236	-0.705539376	-0.670435175	-0.632042472	-0.646488144	-0.631780338	-0.676395139	-0.688249027	-0.743987933	-0.82244044	-0.837649649	-0.877638867	-0.870414371	-0.809380431
0.1896165	0.393178903	0.513322237	0.58810103	0.611182433	0.703492878	0.704907071	0.69383637	0.718778261	0.767527514	0.789121873	0.803223172	0.877051212	0.971854165	1.005594796	0.971622596	1.00752372	0.954332668	0.88842895	0.813540204	0.811290232	0.750176305	0.719113693	0.691341646	0.714988046	0.65384033	0.698977709	0.630904842	0.475838339	0.362585509	0.168528206	0.009302302	-0.204804264	-0.316300721	-0.459220348	-0.581787362	-0.610233949	-0.620438157	-0.685273209	-0.677107221	-0.67491034	-0.638609484	-0.68860059	-0.775569692	-0.776292103	-0.833158599	-0.905811905	-0.950105463	-0.887656551	-0.855540174
0.059746927	0.20646314	0.277941399	0.421103581	0.474640402	0.548239869	0.616749191	0.735547076	0.804408208	0.830920984	0.900920213	0.944043092	0.962739799	1.013049125	1.017991474	1.018904081	1.001396169	1.028692917	1.008633202	0.939840866	0.88863946	0.857521842	0.828007974	0.769936224	0.681401207	0.579754629	0.492206723	0.426130754	0.295515582	0.193259605	0.082053581	-0.022986241	-0.161671696	-0.184165808	-0.3057794	-0.423109952	-0.471167615	-0.593546845	-0.673767915	-0.761899358	-0.807234578	-0.908103702	-0.921151437	-1.007166819	-1.030021499	-1.030081907	-1.086473644	-1.059606615	-1.077594693	-1.071707338
0.085927904	0.195450914	0.296128008	0.377862918	0.499298412	0.565674156	0.654397874	0.696493063	0.783828118	0.860535589	0.908677209	0.916968232	0.963266162	0.942933869	0.979146647	0.979174762	0.969800927	0.971238432	0.975355249	0.921957556	0.909850694	0.834729385	0.773516545	0.683832808	0.623432416	0.546929396	0.471944788	0.379654499	0.324905477	0.188085487	0.103256851	0.028948024	-0.082499875	-0.203086359	-0.297490099	-0.391656319	-0.481954584	-0.566389174	-0.615448689	-0.723738037	-0.741872447	-0.853373061	-0.874079036	-0.950226256	-0.947555932	-0.966253519	-1.004625572	-1.024678039	-0.958612389	-0.962152379
0.048335777	0.178956525	0.291918942	0.411001297	0.496071598	0.552242508	0.483825832	0.407024923	0.326827875	0.279327519	0.286441613	0.374578264	0.497624611	0.618142126	0.760733087	0.786645951	0.762657089	0.628292266	0.519598986	0.370308225	0.271277955	0.271823058	0.29409232	0.391164145	0.483442562	0.517894389	0.509358483	0.434813238	0.277392093	0.15419924	0.051777258	0.013373104	-0.019949849	-0.142094803	-0.28823415	-0.426543031	-0.504051337	-0.539515392	-0.460764466	-0.418334954	-0.315890275	-0.257862852	-0.275684049	-0.379198914	-0.512368519	-0.648790045	-0.756561984	-0.785307781	-0.754945643	-0.616463641
0.108094832	0.20664656	0.272323183	0.416539897	0.450776222	0.549140414	0.605857731	0.760360643	0.766907684	0.84313627	0.873436381	0.888823275	0.929376957	0.979572844	0.985899054	1.015527492	1.035540341	0.988196647	0.961623011	0.950067166	0.901488962	0.826445144	0.760657356	0.682671335	0.618360523	0.591158281	0.433673511	0.348419317	0.280845	0.195596369	0.078854152	-0.025280088	-0.108343162	-0.187777535	-0.29347817	-0.385303413	-0.460853361	-0.566488508	-0.650954604	-0.725385104	-0.745756194	-0.779047806	-0.885495089	-0.922697926	-0.962087015	-0.970542563	-0.962367089	-0.990301978	-1.006713899	-1.001067117
0.118132259	0.162898939	0.277685964	0.356620733	0.477396469	0.595246052	0.620066479	0.720754508	0.794558774	0.817402661	0.800332307	0.902212612	0.980066277	0.992707919	1.040545597	1.010752102	1.005249378	0.989005013	0.937047647	0.935892601	0.881351657	0.779107955	0.776347345	0.751615518	0.619970621	0.594543161	0.472011743	0.426614728	0.305538977	0.200995901	0.123225776	0.031241654	-0.118531762	-0.183484924	-0.295384491	-0.354714766	-0.492149305	-0.538717835	-0.646871806	-0.691796684	-0.730392598	-0.803430156	-0.880260009	-0.923399377	-0.942192694	-0.989417857	-0.997547836	-0.991941959	-0.983497483	-0.988019292
-0.852436392	4.918904398	-3.919734987	-13.64422636	15.87161323	-1.645567641	18.24759886	11.53449193	-2.435236228	-12.28984515	18.32332843	8.71740681	7.515081794	9.881652342	4.977997858	-4.341507344	-12.49237483	-19.10658663	4.465001276	-15.65398826	-0.034627502	2.384031809	6.227109903	19.24884973	-11.74510109	4.904301776	3.99847655	-0.639480507	-3.429762468	-0.906501647	-0.533995366	17.70350004	-3.372946248	11.2810141	10.40308245	25.15040524	-13.5604225	-8.622550447	-14.0607436	18.02415909	-0.221589214	9.640161078	-9.195304839	-8.563801592	14.81825047	-5.025958401	-15.08586633	12.3670469	10.58435674	-14.96676763
0.144870038	0.149052958	0.283304451	0.421047332	0.458486809	0.543938098	0.656150174	0.655149591	0.775592085	0.823493141	0.921974577	0.928464088	0.957145425	1.003247724	0.986036962	1.002138434	0.999237033	0.944516727	0.979696795	0.932824421	0.905000457	0.832437945	0.759532916	0.698339268	1.107138895	0.559211274	0.477903604	0.386426117	0.302287177	0.171992464	0.093924933	-0.023866254	-0.075562902	-0.218654108	-0.319967594	-0.408757716	-0.461258594	-0.513394168	-0.652896264	-0.68491933	-0.763123717	-0.844285475	-0.881362499	-0.882989637	-0.993632215	-0.98787227	-0.980448347	-0.986800155	-0.969630595	-1.005392965
0.218779971	0.462403604	0.618519551	0.704294653	0.731609447	0.7012863	0.719406446	0.701249697	0.638046672	0.655026373	0.716955983	0.740725459	0.859033152	0.914922681	1.002305071	1.004818117	0.98299905	0.939632194	0.858162465	0.820789881	0.709063305	0.667633862	0.66338343	0.745011564	0.737840647	0.764802184	0.777866248	0.654998188	0.582814246	0.445755457	0.219088306	0.00693108	-0.252148219	-0.457752278	-0.620010356	-0.685683841	-0.729827774	-0.705169178	-0.66769053	-0.653213129	-0.64620733	-0.596091056	-0.664976559	-0.706992206	-0.751165021	-0.794294238	-0.895352364	-0.910896286	-0.893733069	-0.805931175
0.111929118	0.170879121	0.258014032	0.391050477	0.460138371	0.560962661	0.632804337	0.739899058	0.815575291	0.845558855	0.856628183	0.966367601	0.984600147	1.018973974	1.033004524	1.049799039	1.00347858	1.009033351	0.971852821	0.969791042	0.924223894	0.870265229	0.769381386	0.741319211	0.697329572	0.585382674	0.475581403	0.426296416	0.327569844	0.176897814	0.12116858	0.014909345	-0.097511314	-0.20957198	-0.300492284	-0.424574091	-0.488141212	-0.619368742	-0.675946799	-0.780897311	-0.839991811	-0.92660059	-0.93513964	-0.995011236	-1.03131568	-1.022869722	-1.087974795	-1.065917756	-1.041065495	-1.045868767
0.068980198	0.158648202	0.2644193	0.422053357	0.425387242	0.561579534	0.670715486	0.68737947	0.807756785	0.848188525	0.893968466	0.909756662	0.961534727	1.004571874	1.003524924	0.950031195	1.01548631	1.038737861	0.945546776	0.939146294	0.879688926	0.842466037	0.724527122	0.711228851	0.958595684	0.538802492	0.464482572	0.378950696	0.303030101	0.205271427	0.093149049	-0.014726741	-0.073102029	-0.227616683	-0.281200591	-0.383732779	-0.492825117	-0.5039189	-0.618194979	-0.724161435	-0.785693083	-0.83073743	-0.891312534	-0.946253161	-0.990961199	-0.970224415	-0.981972255	-0.990404279	-0.984101444	-1.012122312
0.118576308	0.154136139	0.274265841	0.376707694	0.475250969	0.547543194	0.63634447	0.72064138	0.786689208	0.838058373	0.894458973	0.938811721	0.948351117	0.965799649	1.014006493	1.014949113	0.999043216	0.949554909	0.944293196	0.956086712	0.885333346	0.82787405	0.798181215	0.698807835	0.630638475	0.534410842	0.483547248	0.370853617	0.276547511	0.205785429	0.103346035	0.005635345	-0.081048431	-0.211128662	-0.292388506	-0.350878883	-0.461451277	-0.584270329	-0.650073869	-0.68669496	-0.744066779	-0.800186266	-0.902247793	-0.904589617	-0.961401271	-0.977594422	-0.981649791	-0.98185597	-1.001454888	-0.968371726
0.044896005	0.217774091	0.354425606	0.50848245	0.557034938	0.470528276	0.278863178	0.113117146	0.298304166	0.491633819	0.577392637	0.565104537	0.407879191	0.290221143	0.205306673	0.197524517	0.205692989	0.262400527	0.41227437	0.515127531	0.569904463	0.489838799	0.278477554	0.085059468	0.30376792	0.48481891	0.561768119	0.518365455	0.362717203	0.193334754	0.051994411	0.006276836	-0.060276326	-0.194975726	-0.380747158	-0.502329852	-0.563585919	-0.489286105	-0.285243267	-0.098742893	-0.282244849	-0.482382764	-0.538533566	-0.545763229	-0.401726092	-0.273392263	-0.191564372	-0.192952994	-0.204218684	-0.269121204
0.075672113	0.259696296	0.484587369	0.687309286	0.764303577	0.682317078	0.506764011	0.444170669	0.614145391	0.887185333	1.011610269	1.017194272	0.975993621	0.901719907	0.900199721	0.899819132	0.902554386	0.898806777	0.965247943	1.00341408	1.022616325	0.877377296	0.654258502	0.474499514	0.480531366	0.697771997	0.747178378	0.690183248	0.532306603	0.276917365	0.046516385	-0.006884537	-0.074150937	-0.262166921	-0.449294668	-0.690871503	-0.768446837	-0.684129577	-0.508496031	-0.445293679	-0.62210207	-0.905768788	-0.996886691	-1.023075638	-0.929847895	-0.917028814	-0.88351191	-0.913470082	-0.8657978	-0.907441021
0.009166874	0.16534081	0.2717641	0.358752012	0.5387427	0.581091209	0.614933541	0.672693757	0.732156383	0.904265609	0.88245888	0.946882766	0.997651934	0.987055435	1.014764283	0.963409749	1.008675129	0.975963912	0.974199941	0.964645365	0.933156239	0.786262004	0.788912128	0.671749448	0.639600434	0.567324162	0.517166576	0.380091483	0.241049747	0.203684886	0.120556706	0.039897599	-0.085261837	-0.17219372	-0.330336559	-0.377941252	-0.437511169	-0.494847646	-0.640426965	-0.73371547	-0.803353296	-0.800417953	-0.881381405	-0.926324825	-0.961926861	-0.950663923	-0.911832769	-0.999247941	-1.016591747	-0.997368227
0.018772827	0.057643695	0.168929447	0.289850417	0.358522091	0.421685774	0.412671316	0.46445713	0.519400334	0.547003359	0.654466838	0.705950369	0.773930513	0.863880364	0.943320217	0.993641208	0.963228457	0.908870543	0.827500018	0.667946745	0.611536887	0.517792895	0.483178726	0.466002437	0.448190681	0.417798562	0.36301088	0.260818194	0.185705598	0.076554276	0.020519632	-0.010554781	-0.033161999	-0.08423597	-0.13644752	-0.26267102	-0.361277941	-0.405415594	-0.484055404	-0.485244521	-0.486695671	-0.510879045	-0.611569964	-0.723795866	-0.790572432	-0.869395392	-0.948211225	-0.973655367	-0.934778515	-0.907181404
0.101432303	0.173984831	0.246457286	0.381945635	0.48229015	0.553775557	0.625214093	0.70834097	0.763706389	0.848451578	0.903700848	0.948298633	1.015833919	0.996341582	1.019088145	1.001935726	1.059814912	1.00043577	0.988170895	0.977817935	0.895028806	0.848922067	0.817950327	0.733232094	0.649781455	0.596364378	0.489633128	0.389363715	0.330512658	0.187295085	0.088500862	-0.026108418	-0.088404186	-0.21415216	-0.32556856	-0.374547589	-0.496863777	-0.597522577	-0.670284545	-0.767702993	-0.841169703	-0.903540339	-0.959134183	-0.993710665	-1.039543359	-1.044631738	-1.090910496	-1.123519287	-1.090837233	-1.097868964
0.234663208	0.40535845	0.527609612	0.57924273	0.608719814	0.596701751	0.602712039	0.639324954	0.690758682	0.804369162	0.827945933	0.930308442	0.917857143	0.946488099	0.886305422	0.866600244	0.853429103	0.89989294	0.916973884	0.941260327	0.878065289	0.792248558	0.713141759	0.652310045	0.563060408	0.585030754	0.584887352	0.607172642	0.50579989	0.404273483	0.229724823	0.019337964	-0.187876508	-0.416093284	-0.533169784	-0.611416932	-0.608655637	-0.556981608	-0.597548658	-0.617636653	-0.655892032	-0.783683964	-0.866048632	-0.901593054	-0.932923176	-0.944551352	-0.904912805	-0.893936646	-0.921039747	-0.980428572
0.090282653	0.263382153	0.49155528	0.691076861	0.753522058	0.677182228	0.519195288	0.446352703	0.652179449	0.900619899	1.036415358	1.042683481	0.952480448	0.929577821	0.913600494	0.934913594	0.892179752	0.935661177	0.9906115	1.050375894	1.01112593	0.890741185	0.618727927	0.434253787	0.53678725	0.668290127	0.757981581	0.72058372	0.505799622	0.286788571	0.077304885	-0.005420067	-0.084651644	-0.267413997	-0.50320291	-0.696802005	-0.769021915	-0.699387432	-0.494699587	-0.460063202	-0.644623524	-0.860188661	-1.006956895	-1.042266698	-0.944556371	-0.920430112	-0.921966603	-0.908710339	-0.882075182	-0.897754548
0.097826776	0.234463076	0.282163599	0.370950583	0.455961643	0.569096865	0.641763617	0.69101335	0.792921062	0.823828689	0.940499653	0.901666441	0.935983267	0.995842346	0.982358491	1.015188707	0.956411389	0.99272186	0.979212697	0.898073811	0.889769727	0.850307356	0.746700743	0.680693493	0.611569971	0.569955866	0.47821092	0.345807168	0.324009448	0.210047653	0.110864377	-0.012270109	-0.115318905	-0.177550574	-0.321082867	-0.359117295	-0.436050303	-0.563745561	-0.644493029	-0.64974753	-0.755190122	-0.854709785	-0.90680068	-0.881239341	-0.948588964	-0.97827964	-1.030163732	-1.002647639	-1.023960021	-0.993806891
0.078023537	0.277472653	0.474696379	0.672232876	0.719817937	0.649703081	0.514789199	0.413781371	0.611131072	0.825316482	0.942930429	0.924808018	0.86328752	0.817244409	0.826418747	0.823039521	0.822252728	0.81790216	0.891555382	0.953217424	0.959286009	0.832480643	0.618320787	0.390170894	0.489205946	0.659071912	0.728627871	0.67366453	0.455005497	0.271596558	0.058847865	-0.004363145	-0.035851778	-0.227469757	-0.474148509	-0.669545157	-0.734412577	-0.659885325	-0.486938766	-0.40712512	-0.564461511	-0.790684419	-0.966526821	-0.965786889	-0.886903734	-0.843690627	-0.845625719	-0.833054542	-0.821710807	-0.858479759
0.114725445	0.200500942	0.265976183	0.385360034	0.459926476	0.536827054	0.646758596	0.701660896	0.731677656	0.787991105	0.841073963	0.937402415	0.96991356	0.932855466	1.016483378	0.969287744	0.931361351	0.976766604	0.974224904	0.931693163	0.880976423	0.860221932	0.758325829	0.717091653	0.583480774	0.548403254	0.461244744	0.393896272	0.290190739	0.201103504	0.10269799	-0.01272392	-0.046920766	-0.187433966	-0.300632982	-0.391244547	-0.487101062	-0.575747841	-0.662556612	-0.705874642	-0.782869466	-0.886373877	-0.838834686	-0.895015442	-0.942449497	-0.979421863	-0.982555081	-0.998774578	-1.011781476	-0.981610222
0.0561921	0.299905095	0.498881371	0.670436472	0.739815416	0.67316744	0.515403035	0.446118195	0.626118534	0.894299761	0.972049921	1.01701576	0.972012127	0.891231804	0.869259523	0.917189893	0.8906871	0.87299881	0.930238181	1.00520782	0.997310969	0.870972425	0.643647905	0.452050597	0.51808469	0.693404037	0.779744224	0.691563589	0.499263956	0.281187864	0.080063077	0.012074449	-0.051199494	-0.24228629	-0.471467356	-0.668930159	-0.774418531	-0.701727632	-0.488743205	-0.472878616	-0.607755301	-0.877070545	-0.985318063	-1.00839472	-0.942283424	-0.902459661	-0.906424353	-0.867894939	-0.884844993	-0.86321138
0.081079727	0.217899224	0.264337352	0.399169738	0.479714693	0.549297655	0.616563025	0.682542394	0.780001961	0.839482137	0.847797545	0.933868114	0.971497169	0.99456077	1.029415904	1.021673495	1.007005778	0.980395714	0.956962474	0.913140651	0.901611637	0.818849901	0.750590094	0.677026586	0.633847832	0.56235629	0.436786848	0.391195857	0.288944766	0.187667884	0.098169682	0.002927359	-0.104912704	-0.188857392	-0.27592501	-0.395077825	-0.451688523	-0.503668326	-0.606366249	-0.710809495	-0.792434207	-0.843503816	-0.888426204	-0.914004617	-0.986647916	-1.00704953	-0.992575897	-0.983667636	-0.976582744	-1.006732925
0.099358776	0.206588347	0.29608128	0.394748458	0.458669503	0.545451239	0.616534794	0.717687349	0.774357485	0.849396238	0.872147858	0.923701358	0.996235841	0.994704985	0.966521613	1.002792895	1.028591133	0.966943359	0.948749291	0.941099907	0.880755655	0.825675605	0.776637244	0.710752552	0.638269635	0.561743539	0.461906414	0.347610211	0.273438921	0.194376085	0.11273189	-0.003062752	-0.113878136	-0.18547838	-0.280596366	-0.363776891	-0.479685731	-0.569859587	-0.604130381	-0.701703426	-0.78275158	-0.831758812	-0.905041665	-0.917168717	-0.951534999	-0.983712068	-0.990447894	-1.020887701	-0.981806429	-0.967274725
0.290024343	0.507231093	0.606974509	0.669090813	0.619977109	0.577598449	0.566033793	0.591292719	0.695043512	0.758637386	0.868069506	0.941441623	0.938045895	0.927997225	0.862850954	0.829484793	0.86655899	0.882169444	0.931830342	0.906460609	0.87557745	0.776308642	0.674483832	0.596155348	0.521035922	0.559207355	0.614599636	0.685494079	0.649158259	0.452998391	0.256632489	0.022839521	-0.256315424	-0.486898067	-0.611416299	-0.656590081	-0.5868606	-0.574613086	-0.600223715	-0.629122676	-0.708186405	-0.801035966	-0.87755258	-0.93693163	-0.91627402	-0.910035294	-0.850649115	-0.863451376	-0.82559267	-0.863658267
0.112795454	0.199834106	0.308346846	0.380478202	0.472377073	0.524498301	0.655408697	0.732119462	0.794192208	0.849454606	0.886504888	0.928624878	0.962047896	1.011638117	0.995035564	0.973328763	0.964577095	0.99155252	0.960501232	0.90730361	0.877558371	0.846910961	0.770096594	0.725595184	0.657693541	0.557959504	0.470426315	0.369489855	0.308304383	0.182117539	0.080094061	0.011919711	-0.096265744	-0.195941313	-0.304511449	-0.371351174	-0.493653254	-0.550054169	-0.620854526	-0.692334086	-0.76344758	-0.825298671	-0.90045288	-0.946484092	-0.960787858	-0.976762868	-0.992106958	-1.022975555	-1.005374923	-0.969377303
0.08811767	0.226601863	0.30246371	0.381496903	0.470846899	0.565032555	0.637376802	0.69385665	0.765361674	0.848521027	0.876956287	0.928919594	0.956347875	1.001691159	1.003898115	1.018192157	1.015734639	0.966015559	0.952551254	0.927638528	0.89792155	0.842812496	0.78882238	0.686703379	0.656606659	0.55422469	0.497180955	0.402760458	0.28707239	0.18234509	0.107379362	0.007890251	-0.08715141	-0.194964711	-0.263863293	-0.372536404	-0.460599019	-0.564860905	-0.622005079	-0.709728868	-0.795308068	-0.822111637	-0.880718871	-0.949844928	-0.985528553	-0.967299995	-1.003689032	-0.994332099	-0.987501649	-0.983261983
0.098873952	0.215157867	0.324121333	0.381095851	0.432337947	0.617880752	0.640924924	0.74081112	0.793434174	0.853066466	0.892472523	0.845246047	0.869749856	0.968583066	0.988755551	1.014585892	1.010007129	0.998999075	0.95235776	0.953631051	0.902336876	0.779762237	0.738530524	0.744869892	0.610455735	0.577653766	0.451584004	0.379785737	0.28777954	0.212389294	0.114895221	-0.067919319	-0.122080713	-0.193210515	-0.349637755	-0.382262791	-0.500569029	-0.471073061	-0.654220827	-0.699334521	-0.772927046	-0.805774451	-0.831481949	-0.93076509	-0.966071061	-0.962127741	-1.002968226	-1.019822694	-1.014238527	-0.960821396
0.063881198	0.251345924	0.519985466	0.710326347	0.79283109	0.733825358	0.525685926	0.451296072	0.703967614	0.920773021	1.059937814	1.09377846	1.03344246	0.97499125	0.942420456	0.924026948	0.957286159	0.977551465	1.035899613	1.063190794	1.077373816	0.914451073	0.662276306	0.486827186	0.520762654	0.73430524	0.812012038	0.709005383	0.540787839	0.26688826	0.096109294	-0.014061657	-0.083473193	-0.263424702	-0.496950843	-0.720667742	-0.798609575	-0.722733287	-0.545401267	-0.484416308	-0.66366767	-0.899014936	-1.045447246	-1.074729811	-1.008641309	-0.956286272	-0.92409756	-0.946149995	-0.969442866	-0.966355845
43.10961128	-5.038068681	6.498853748	-17.68912987	7.920888522	-3.105232177	27.88993022	-7.343722592	7.123121865	16.57534677	6.125176363	14.82554724	-14.06123864	-5.986350063	-18.81186313	37.2945526	16.76752023	23.34695001	-4.857353319	12.56475253	9.552733625	3.674170034	-14.17759482	1.300014484	-21.49323098	-25.84459765	18.75491238	12.32852649	8.109956168	-10.55046095	-18.21385879	-14.72196741	-3.989755381	-6.743634641	-23.52896998	5.023712993	-6.699414961	7.741551635	-0.283036971	-25.82201608	16.10795868	8.365944456	3.525990708	3.303204839	-18.77936306	7.350933868	-18.75829402	7.988279109	-8.737678076	3.451802935
0.121461282	0.179790396	0.283190066	0.387363243	0.489304429	0.534529988	0.648735988	0.677269753	0.777374306	0.803397108	0.915239015	0.968511107	0.979082607	0.977832887	0.963657114	1.005763712	1.004162106	1.007208283	1.003067393	0.942320636	0.860347432	0.842618737	0.73410146	0.706621007	0.685458766	0.602432114	0.463258305	0.382911803	0.292915582	0.186797652	0.065535589	-0.065622178	-0.112154134	-0.198189338	-0.294659911	-0.392066809	-0.473151176	-0.535897312	-0.645529928	-0.686175968	-0.774777194	-0.83259039	-0.878019113	-0.917560397	-0.908141844	-0.949873959	-0.968722127	-0.968678104	-1.003122102	-0.959652819
0.084058819	0.169871526	0.295249585	0.365821105	0.515662762	0.553624874	0.614288912	0.733036187	0.782552977	0.80712857	0.891698998	0.875906589	0.974511002	1.008554811	0.977602965	1.013852125	0.997363303	1.003485306	0.945347179	0.935079338	0.886817158	0.81538676	0.767504455	0.709358734	0.650551294	0.567333184	0.497766377	0.355426472	0.275793486	0.22357782	0.089179466	-0.021568176	-0.172272993	-0.220671059	-0.313836805	-0.382290507	-0.48882748	-0.490159608	-0.679061714	-0.746453053	-0.805846761	-0.895340208	-0.86698135	-0.878199428	-0.939062795	-0.949468032	-1.000184292	-1.042575431	-0.994415312	-0.961179979
0.083067107	0.197709286	0.336087626	0.341207124	0.490337991	0.552384413	0.626961359	0.72597063	0.801508398	0.859080943	0.935310453	0.956959399	1.001054941	0.970764885	1.026196529	1.046488093	1.020088176	1.00791571	1.005587873	0.969633338	0.927957398	0.854611634	0.835014723	0.755596377	0.634724892	0.557564412	0.495930568	0.406814096	0.306303331	0.170735611	0.100239101	-0.043207129	-0.116084824	-0.203072172	-0.287435094	-0.427323476	-0.521742208	-0.602601942	-0.689094535	-0.764786618	-0.821318304	-0.91545384	-0.979638242	-0.965910319	-1.038984794	-1.074108432	-1.07313392	-1.062786923	-1.105988025	-1.081501776
0.09454301	0.201383918	0.282991037	0.335490278	0.46253677	0.541342527	0.59403704	0.646751874	0.810749361	0.837542334	0.90649419	0.923122872	0.978529355	0.982780499	0.956697656	0.980512219	0.979310081	1.004254037	0.95188773	0.943983183	0.826172341	0.818894515	0.763350314	0.702278679	0.311901617	0.553132765	0.468127226	0.401481901	0.271785878	0.185324935	0.142074508	0.024320019	-0.089332207	-0.16891294	-0.314265164	-0.415949094	-0.439522822	-0.575849374	-0.643460065	-0.723645818	-0.780268527	-0.844510094	-0.878004242	-0.942205907	-0.947715205	-0.981416645	-0.985745581	-1.022125668	-0.982106591	-0.992920791
0.077784443	0.19934359	0.280530527	0.392543495	0.480535082	0.52646489	0.648708162	0.694972668	0.801511447	0.871735723	0.821039867	0.938450938	0.92767541	0.964048495	0.996655166	0.980275554	1.056559417	1.020977464	0.926567026	0.902871203	0.877408404	0.829065141	0.685081983	0.732541526	0.631447936	0.547284266	0.460494184	0.326183341	0.284647221	0.159295486	0.095792282	0.02935013	-0.069629525	-0.207778506	-0.314230364	-0.409766582	-0.481484729	-0.550155645	-0.598541058	-0.693467606	-0.743669249	-0.805756402	-0.881408963	-0.919371481	-0.937356881	-0.975040967	-0.970950585	-0.999179777	-1.031057572	-0.970860108
0.070059283	0.211703601	0.316559581	0.305569799	0.487521889	0.600795131	0.627816716	0.686811178	0.781098292	0.850808613	0.880085383	0.933766835	0.97172888	1.00753221	1.00523009	0.991968103	1.032210232	1.037446523	0.930312151	0.962286946	0.869749462	0.831720419	0.796219823	0.693140482	0.61576349	0.551310088	0.52598152	0.43311662	0.293404798	0.184126774	0.103351233	0.049432567	-0.139625862	-0.180967975	-0.331410127	-0.409802644	-0.458151521	-0.551449034	-0.627780728	-0.707521004	-0.754231584	-0.821511285	-0.872363958	-0.950697738	-0.964602764	-0.949562127	-0.993981005	-0.988625919	-0.991764309	-0.958208145
0.085109685	0.193063011	0.307720453	0.390970132	0.493891058	0.560451404	0.639941493	0.700138658	0.734406339	0.843124462	0.91591731	0.890889849	0.937612316	0.948254803	0.983524156	1.016081513	0.989216922	1.002404034	0.923927233	0.933238326	0.890072698	0.862887628	0.715478415	0.717389999	0.896489404	0.573430079	0.47657691	0.360416555	0.31420289	0.172430439	0.098839854	-0.013334922	-0.110508017	-0.211972487	-0.26783386	-0.350069298	-0.442191076	-0.541633401	-0.648160456	-0.715449883	-0.764636916	-0.826127525	-0.898184899	-0.933131298	-0.986777632	-0.981556331	-0.997442415	-1.021479528	-0.985405885	-0.983496914
0.107986639	0.247425827	0.310300682	0.384429948	0.479580948	0.535806121	0.625247066	0.728216013	0.74178898	0.834395154	0.918936202	0.9301296	0.970152717	0.968498277	0.98052661	0.957595329	0.968383999	0.968306444	0.922692798	0.891132298	0.886706544	0.824368229	0.787902496	0.671689969	1.019043501	0.552738634	0.474675624	0.403461663	0.286563094	0.22980966	0.094330525	0.0078438	-0.095856838	-0.211193307	-0.323080473	-0.41113185	-0.463742216	-0.543555147	-0.626277003	-0.707792236	-0.769573047	-0.831459105	-0.885748377	-0.924187422	-1.013196252	-0.978109224	-1.002816445	-1.035473118	-1.020607806	-0.985273984
0.047714255	0.184719446	0.326343635	0.366895221	0.454345041	0.545846312	0.614184252	0.752056067	0.797561694	0.8529152	0.840904464	0.887409665	0.902015764	0.987283631	1.030536073	0.997247682	1.012870469	0.969703661	0.928002939	0.921647476	0.908767647	0.835640476	0.767807658	0.689223043	0.643175855	0.551653543	0.478626851	0.35338736	0.309276386	0.199913887	0.10018283	0.006294975	-0.092076115	-0.184739735	-0.257480231	-0.401522693	-0.47219433	-0.577192757	-0.638983265	-0.732314546	-0.747650983	-0.851246774	-0.944270656	-0.91886349	-0.984217871	-1.003503074	-1.006598046	-0.998766634	-0.976846947	-0.964400009
0.098396726	0.17629657	0.277417192	0.381826393	0.469778706	0.548140833	0.637558497	0.708734737	0.792198519	0.822882886	0.877747846	0.942491535	0.966772614	0.963273414	0.988961414	0.997966287	0.987639993	0.99390309	0.953941024	0.930277985	0.883323782	0.846052593	0.799563737	0.704785511	0.612017696	0.551681016	0.466531478	0.394353625	0.298707755	0.186536304	0.098029283	0.016931265	-0.084431512	-0.179399981	-0.262681635	-0.350406409	-0.458581124	-0.575719437	-0.641552515	-0.679248917	-0.772121989	-0.845031082	-0.868587771	-0.894256423	-0.92740712	-0.989272921	-0.983797076	-1.004146496	-1.011043688	-0.96479027
0.096684406	0.161750569	0.291998597	0.374448486	0.483320045	0.56985886	0.61389682	0.721473413	0.787766899	0.861832824	0.893485688	0.965278174	0.978774251	1.000149335	1.044180842	1.035673065	1.044046776	1.0048111	0.985425575	0.94959253	0.897063525	0.875009034	0.799333885	0.731897834	0.684117731	0.566336892	0.516532541	0.358864888	0.355373896	0.2139269	0.089707931	-0.015475577	-0.07934069	-0.232927611	-0.296167898	-0.355461635	-0.48479275	-0.562936892	-0.682269993	-0.728474117	-0.766051594	-0.895219996	-0.922558985	-1.031774158	-1.021026631	-1.027875552	-1.089929055	-1.046576374	-1.045043487	-1.036613158
0.077755759	0.287505217	0.521926616	0.725816613	0.807495038	0.65773437	0.495899923	0.447586089	0.666774248	0.934874884	1.032595683	1.059279928	1.022228428	0.915824398	0.927588699	0.944338445	0.952261623	0.949245497	0.991539293	1.066667423	1.033200223	0.924269367	0.667943262	0.469870362	0.500098631	0.68497626	0.7805294	0.706947592	0.51756627	0.253434236	0.068372349	-0.014059018	-0.099424512	-0.270181301	-0.50288241	-0.684807847	-0.744614085	-0.69361306	-0.565124094	-0.470580344	-0.655651805	-0.909555245	-1.085652417	-1.062818873	-0.99240432	-0.953660384	-0.948843895	-0.976105227	-0.954032462	-0.964829375
0.073544029	0.196220816	0.27114171	0.371236474	0.508895099	0.553396855	0.650991071	0.730822387	0.822910697	0.844703582	0.904310475	0.950774659	0.968686878	0.997889546	1.012566774	1.003347786	1.010452262	1.029018259	0.980660543	0.943736659	0.922433542	0.854405142	0.802121978	0.731850275	0.671381232	0.591582056	0.488964511	0.384351134	0.287457206	0.166998821	0.094519133	-0.009866879	-0.10552727	-0.224942269	-0.283040872	-0.368464996	-0.466501176	-0.613213237	-0.658800755	-0.757933831	-0.840092408	-0.902241336	-0.952090479	-1.018817235	-1.029119547	-1.007166781	-1.078974795	-1.080663954	-1.100262903	-1.055836276
0.036984261	0.127478713	0.292394456	0.423839003	0.521333421	0.490243242	0.463217193	0.398370437	0.339599997	0.274783943	0.314133761	0.417754791	0.515062164	0.652427429	0.774189349	0.811189239	0.748252802	0.707320962	0.555709913	0.416952524	0.313192088	0.33071849	0.340168076	0.382085588	0.450851775	0.525929071	0.474071601	0.382797268	0.292176092	0.186984524	0.04680306	0.014418256	-0.05550474	-0.151665529	-0.306633198	-0.397579751	-0.515331439	-0.518633234	-0.481751708	-0.434049264	-0.340939021	-0.286854037	-0.317446986	-0.41638882	-0.511060929	-0.640071347	-0.799164969	-0.839162145	-0.799816904	-0.661639722
0.13276205	0.183571416	0.284804689	0.397721395	0.500153122	0.595321402	0.599671193	0.697960869	0.782161312	0.818758845	0.865398497	0.922080845	0.95767482	0.977584228	0.980000446	1.000104316	0.956696819	1.003562771	0.974518421	0.937738989	0.885164868	0.837798585	0.804439691	0.711590988	0.650566741	0.538054187	0.485363671	0.362594579	0.335214176	0.193941111	0.091118564	-0.024753407	-0.102547103	-0.189008923	-0.287637799	-0.373916453	-0.458338956	-0.537207145	-0.665329437	-0.697056332	-0.770363566	-0.81653118	-0.910544413	-0.90746098	-0.956380556	-0.988476554	-0.999129127	-0.998059354	-0.978709905	-0.983612353
0.050017984	0.165392721	0.296575824	0.461556707	0.546813476	0.536073321	0.472386013	0.359009138	0.245530582	0.166772989	0.165875742	0.237636479	0.403035152	0.531821898	0.652980481	0.702676923	0.646506178	0.531508309	0.391264584	0.236268689	0.161088439	0.177724251	0.228023432	0.372409503	0.448463235	0.547764305	0.539234771	0.451569425	0.313169848	0.198461456	0.048338179	-0.010037437	-0.048350687	-0.1493712	-0.306939312	-0.43638865	-0.543687734	-0.555871403	-0.492263791	-0.335716409	-0.216121379	-0.157363004	-0.140287075	-0.247998952	-0.378605553	-0.520941417	-0.66464744	-0.694056956	-0.667758609	-0.536655185
0.05361838	0.197764183	0.283762904	0.361838483	0.506381601	0.522737118	0.642005588	0.680517843	0.766705045	0.760248483	0.912033865	0.925596531	0.948272387	0.972796409	1.009756781	0.992462596	1.014518739	1.003144623	0.976113383	0.954737439	0.89257208	0.813489372	0.766336056	0.66682156	0.644394292	0.552084443	0.47970533	0.376466783	0.284586967	0.183609515	0.085720175	0.004791277	-0.121976195	-0.18354648	-0.25668691	-0.422374354	-0.458724188	-0.545805478	-0.673225772	-0.66218518	-0.724532852	-0.847377041	-0.911738262	-0.912101217	-0.942394278	-1.021720371	-0.981303621	-0.964269619	-0.960468937	-0.985097899
0.12151464	0.216525476	0.314398045	0.378834132	0.46054822	0.547948292	0.628442288	0.769170837	0.810829295	0.867421193	0.889671893	1.011497688	0.941132121	1.018312729	1.021770205	1.04527169	0.991832443	1.03571415	0.995246526	0.969255251	0.900328506	0.837697849	0.828053388	0.709057237	0.622262723	0.584161932	0.529866823	0.42528464	0.292656948	0.19670312	0.059497827	0.000283295	-0.122974473	-0.218289423	-0.323900138	-0.429907599	-0.469573843	-0.609575382	-0.673252645	-0.73967103	-0.782165636	-0.947590134	-0.978618719	-0.956650645	-1.062093802	-1.069224779	-1.052004421	-1.067508584	-1.062795319	-1.034221823
15.42046264	10.38090366	-11.46945161	10.85277465	1.064908963	21.18247157	19.41528021	-19.37406277	-4.120393683	29.6526839	-14.70618164	23.08375698	21.93112233	-31.2935328	-7.422740149	-18.38374495	34.96668823	38.74125768	-10.99108965	-26.73043685	15.55438046	8.607356445	-21.11856512	15.89546369	5.663596079	8.864917245	-7.245645665	0.565603036	1.626708993	-2.015840434	32.41497015	-2.58176093	-2.812485348	32.30116802	-15.81295378	-7.263637466	20.7801468	-7.37300344	-8.108475255	4.751639522	-1.710281596	-3.558631439	-24.72055353	15.00506145	2.730458731	3.816998722	4.333231186	1.47988984	0.344709767	-2.76859642
0.113874638	0.158065577	0.260602084	0.358767323	0.486754111	0.592713787	0.638811421	0.768940018	0.793133799	0.807073227	0.888322458	0.924708077	0.952290184	1.014382058	1.008858014	1.044679338	1.037725584	1.025428272	0.97305302	0.989930928	0.949906085	0.872514062	0.794504776	0.781299821	0.676516968	0.588106997	0.517065549	0.400980565	0.26933542	0.21273048	0.116909418	-0.005318657	-0.081253558	-0.204226397	-0.300316468	-0.410222707	-0.49113974	-0.598568466	-0.672875784	-0.742628796	-0.825094803	-0.868546464	-0.934372229	-0.953909937	-1.036956052	-1.07330952	-1.112904226	-1.072213319	-1.085181596	-1.044322954
0.110982825	0.143148236	0.306723549	0.411942766	0.448154507	0.516541635	0.660941717	0.723279878	0.833959544	0.864113262	0.881223331	0.948607686	0.936101977	0.967586269	1.016038086	1.005692496	0.997158555	0.987966978	0.940157475	0.946879746	0.904712617	0.844120092	0.748492239	0.678783843	0.657051743	0.553012197	0.452068248	0.377845296	0.279828968	0.228547367	0.116811538	0.010018772	-0.112099533	-0.157267091	-0.261017196	-0.36892058	-0.467091475	-0.570380226	-0.631244116	-0.764052578	-0.791706004	-0.820761707	-0.886559141	-0.934305892	-0.97836157	-1.003391293	-0.97044395	-0.969900891	-1.006301423	-0.998412639
0.140303036	0.210095256	0.305716469	0.36888857	0.499996643	0.543219288	0.614819826	0.688850181	0.776780315	0.850851676	0.920132958	0.902756808	0.959341124	0.967397764	0.998661327	1.046518805	0.97438323	1.010825577	0.962582952	0.900888	0.859184969	0.813694264	0.754998619	0.696460329	0.6544867	0.554049342	0.495364996	0.417570602	0.27427081	0.216898835	0.138675692	0.01108405	-0.086502385	-0.234117533	-0.268526467	-0.377536052	-0.477852642	-0.564039904	-0.615755283	-0.715571885	-0.79153044	-0.842886239	-0.876617788	-0.944453498	-0.971741603	-0.980684084	-0.971955727	-1.049064824	-1.005760628	-0.947254304
0.103370206	0.200691178	0.293626408	0.38100996	0.468109989	0.575911185	0.612076221	0.709586969	0.775135602	0.834973342	0.865103455	0.918993911	0.97182095	0.965754112	1.00108714	0.965816613	1.017326626	0.956024007	0.986416185	0.898153357	0.875702344	0.829797514	0.770496037	0.729062643	0.651713488	0.54766162	0.464519373	0.364057045	0.258805081	0.198315121	0.128100695	0.005476943	-0.106778589	-0.194411938	-0.265357345	-0.391764131	-0.473258765	-0.549155076	-0.625641238	-0.72379639	-0.759875689	-0.854934027	-0.886968598	-0.900671524	-0.951379258	-0.991919148	-0.97531449	-0.995716091	-1.00577957	-0.974978225
0.119848861	0.197990547	0.31146692	0.411054988	0.44607636	0.582962146	0.606921053	0.728879487	0.775310293	0.840175238	0.908085307	0.955645828	1.00070687	1.007995813	1.042039995	1.004030371	1.027073398	0.988123201	0.996254799	0.966086467	0.944342701	0.875173637	0.812362303	0.759838928	0.692158219	0.557698115	0.480044903	0.400551437	0.321617973	0.189106658	0.120445103	-0.011933858	-0.112033339	-0.204198731	-0.31620373	-0.41455825	-0.523515228	-0.6024352	-0.676193784	-0.762384511	-0.824269435	-0.907100835	-0.950653498	-0.970248503	-1.025954958	-1.03177035	-1.086439959	-1.05382046	-1.07318813	-1.046910349
0.233922288	0.387044101	0.610983201	0.650235772	0.732052106	0.695415956	0.731265317	0.668014918	0.69274484	0.696191727	0.751709234	0.769689569	0.907215917	0.966398426	1.024480877	1.02281542	0.978995801	0.940018229	0.89767791	0.822512256	0.772079672	0.703063232	0.734335551	0.725700534	0.779210616	0.759615657	0.745684601	0.700354675	0.618185212	0.378331825	0.232541222	0.007295417	-0.218320435	-0.360076239	-0.56383233	-0.662659199	-0.715574134	-0.738958154	-0.653816605	-0.674346773	-0.632007919	-0.612210678	-0.659182193	-0.720946688	-0.793136748	-0.823716217	-0.902419389	-0.862098567	-0.888158883	-0.814205767
0.12197184	0.195085334	0.286513442	0.362471035	0.452138184	0.567029664	0.646400527	0.69547877	0.749575521	0.819352747	0.898382547	0.927305767	0.963144378	0.996038829	0.999290226	0.975533101	1.008009817	0.988456889	0.975953067	0.905940113	0.882276964	0.834482101	0.755079252	0.70052253	0.648365205	0.556341798	0.466350183	0.388634965	0.279150197	0.1926952	0.071958841	0.030959712	-0.06343767	-0.173002887	-0.280312636	-0.365692687	-0.472574061	-0.540816204	-0.664991492	-0.690003039	-0.798443368	-0.851763898	-0.878420186	-0.932119026	-0.993807654	-0.986739671	-0.983347897	-0.998143967	-0.997512405	-0.976545552
0.10984468	0.214129651	0.306587728	0.374821822	0.464366538	0.574219396	0.634830047	0.698191482	0.757672781	0.813566221	0.858391802	0.929870192	0.961280717	1.020067979	1.0001465	1.018608025	1.025636184	1.014802237	0.962678082	0.878958345	0.867449105	0.835390438	0.832904671	0.740179162	0.631097574	0.534371844	0.454488129	0.390049473	0.289541304	0.195304231	0.125506038	-0.006903264	-0.123718471	-0.202662154	-0.2780616	-0.404154445	-0.45592115	-0.55884952	-0.631351696	-0.684985304	-0.701608835	-0.831624503	-0.871109945	-0.918520835	-0.954996533	-1.005390081	-0.989209067	-0.968571034	-0.997143405	-0.968769824
0.073310626	0.200789151	0.29466497	0.368463267	0.449220051	0.563256704	0.640390071	0.714036246	0.795767739	0.850425703	0.846300971	0.916651934	0.951918002	0.95953686	0.993305243	0.973356496	0.995252462	0.983222058	0.944906496	0.945105246	0.863282012	0.806635725	0.793118853	0.706875862	0.651643337	0.54244834	0.43627378	0.366112969	0.277039667	0.202390571	0.102254962	0.012608114	-0.104897511	-0.219289022	-0.276328252	-0.357274996	-0.476406349	-0.553011321	-0.625603844	-0.715355558	-0.768668939	-0.809269407	-0.900486936	-0.928282948	-0.954917236	-1.015528799	-1.001081108	-0.998833324	-1.007184181	-0.971740322
0.081467865	0.217205732	0.303081751	0.422089671	0.460584576	0.527578461	0.638365984	0.732812236	0.796137981	0.819703448	0.935046403	0.920105423	0.983351661	0.945060482	0.991705746	1.009832034	1.042377107	1.004161627	0.998411411	0.979745978	0.900644832	0.855640948	0.790792441	0.739858706	0.673953286	0.573093642	0.524994589	0.398707437	0.324791191	0.181063591	0.068327971	-0.009890396	-0.087054713	-0.208361265	-0.275262707	-0.383533359	-0.488669337	-0.59436439	-0.632963904	-0.758491201	-0.818660743	-0.885859415	-0.909078421	-0.960065177	-1.010627019	-1.073533867	-1.013370054	-1.07320014	-1.039463782	-1.044741226
0.060956482	0.266789239	0.519565817	0.69242612	0.790819169	0.692484699	0.54096215	0.432185774	0.663895696	0.89224502	1.045756725	1.061968349	0.965917898	0.94502912	0.944269058	0.946106427	0.902872922	0.915002199	1.002871773	1.085353304	1.035749653	0.920464853	0.689017363	0.473129131	0.512760205	0.705061762	0.770895804	0.725213735	0.480527177	0.267912271	0.080419036	-0.02207074	-0.087788208	-0.243599705	-0.489923392	-0.71019056	-0.769174987	-0.714489213	-0.539399192	-0.455178817	-0.690530268	-0.903229606	-1.047698541	-1.06121208	-0.970908985	-0.907494127	-0.944860548	-0.933953759	-0.944161381	-0.953935213
0.162807185	0.171152487	0.308554695	0.406769734	0.446072845	0.559607808	0.649188777	0.711360091	0.788041765	0.854456785	0.889932634	0.932042904	0.981542062	1.021854828	1.036821894	1.012253516	1.029269322	0.968376341	0.97997465	0.999706697	0.933479968	0.921954383	0.763816782	0.752185486	0.680349131	0.620661675	0.468176487	0.385165132	0.303037897	0.252582304	0.124450952	-0.008524556	-0.129184289	-0.196188303	-0.349070461	-0.410288375	-0.48132137	-0.615314135	-0.664256271	-0.751040888	-0.814672539	-0.910423448	-0.941848455	-0.995207999	-1.035501386	-1.022806351	-1.086369753	-1.102679239	-1.088583722	-1.062375541
4.237329508	4.688286784	4.052678994	-0.109624566	4.523676405	-15.10706519	3.029671043	-3.831550886	-3.244292195	2.558355977	-0.793769564	7.863121954	2.639510229	-2.723459868	-7.93738574	5.618375763	-14.2687299	-0.51541742	5.310211075	-10.8823927	4.023541284	-15.13101275	-7.845489485	-6.135680395	2.804428784	1.406043747	5.567943841	5.302743017	2.357791251	2.146632848	1.66825029	-13.9803765	-3.473145066	8.720287444	-1.3368428	3.264038118	-0.297185002	5.252577845	0.489846537	-2.274456695	13.97822996	-0.969835315	2.719028348	-1.162602137	-1.387557299	-4.492330833	-1.16817765	0.749614787	7.409343405	-2.507989812
0.076174802	0.204603957	0.239094562	0.355793082	0.459901459	0.60067277	0.576249679	0.690158169	0.803620872	0.853561698	0.930143379	0.93172284	0.952642947	1.01102897	1.011690181	1.025851985	1.015490554	1.06028849	0.998411361	0.939357755	0.91216102	0.877620423	0.806430755	0.754554004	0.672662181	0.55321597	0.512006323	0.409682105	0.292779059	0.194745129	0.122564812	-0.040916042	-0.086179042	-0.202575648	-0.276853447	-0.357797754	-0.479631794	-0.587549236	-0.672093579	-0.762034896	-0.831549123	-0.840597807	-0.934757296	-0.987409326	-1.050796101	-1.079720797	-1.0834196	-1.035930046	-1.00953869	-1.06246343
0.067072341	0.217784289	0.318628172	0.348560517	0.477873978	0.491901548	0.610791415	0.702219825	0.797963414	0.830742535	0.828287476	0.936519831	0.907504332	0.947062839	0.954337191	1.021062923	0.914683304	0.96874678	0.965218599	0.895462045	0.871024276	0.883933739	0.779934163	0.77826511	0.620787385	0.580695322	0.490403387	0.429987338	0.288983657	0.253359047	0.080991398	-0.023857705	-0.094126193	-0.192069061	-0.276061797	-0.41924514	-0.476276412	-0.536147788	-0.605271384	-0.678478384	-0.72545256	-0.846929271	-0.843039023	-0.931959811	-0.967473641	-0.97059438	-1.00485217	-1.021721614	-1.025271517	-0.99862402
0.085797366	0.166448456	0.281224713	0.401906097	0.482360054	0.581316941	0.62740338	0.732107938	0.783200517	0.812664676	0.906273188	0.933975808	0.961625382	0.955057058	0.986168026	1.013727275	1.031553974	1.002430494	0.934810212	0.923930853	0.892487042	0.792463635	0.761024596	0.672322215	1.084345157	0.564305549	0.4816296	0.343750883	0.25953089	0.167013794	0.055518738	0.009763184	-0.117270763	-0.161860264	-0.336968583	-0.39643513	-0.442356803	-0.566739373	-0.634898729	-0.694993975	-0.76715993	-0.826241718	-0.883821809	-0.949717728	-0.96720949	-0.980343431	-1.039206172	-1.019386167	-1.026198231	-0.978896672
0.11184091	0.173417339	0.263931629	0.401834053	0.471124726	0.545916469	0.600537593	0.732402086	0.807853708	0.852309105	0.856566631	0.981622614	1.041660286	0.982506187	1.03478684	1.03216169	1.038564239	1.04631573	1.000121096	0.92412638	0.925674231	0.901455526	0.749267445	0.761734162	0.639181061	0.54700398	0.489076913	0.431313123	0.330575428	0.187729902	0.088409913	0.010061324	-0.198355798	-0.175689071	-0.279840118	-0.413125082	-0.590433092	-0.577369885	-0.683955666	-0.775774608	-0.82745474	-0.912086922	-0.944484382	-0.967191358	-1.045098327	-1.071740391	-1.079820213	-1.084865726	-1.053297787	-1.073688096
0.017879926	0.095807391	0.231609454	0.309663838	0.326159836	0.447697962	0.438359084	0.479427204	0.459870111	0.518225616	0.521408812	0.671253563	0.758219295	0.844091365	0.900271445	0.946778587	0.920139697	0.847627566	0.720543207	0.624298932	0.539200634	0.496504102	0.489435453	0.490507142	0.493161648	0.421535004	0.406289278	0.313469941	0.190675169	0.081921808	0.021616441	0.005028346	-0.049850754	-0.113154919	-0.191548133	-0.283166877	-0.352685309	-0.440532585	-0.502067466	-0.435726797	-0.470337643	-0.533786109	-0.579309185	-0.666754262	-0.795531783	-0.840543892	-0.955374827	-0.941565544	-0.917017084	-0.852179754
0.083787742	0.17515365	0.302796498	0.381537929	0.454473736	0.54283155	0.661480584	0.694324537	0.772571226	0.82260354	0.878412526	0.918652909	0.980378501	0.977825513	0.9928357	1.03961855	0.991946058	0.97589583	0.958375998	0.917286127	0.900706944	0.842835799	0.792473672	0.730739911	0.648130326	0.558406703	0.475123687	0.437027161	0.313397259	0.208842297	0.09572731	-0.015779762	-0.075528405	-0.167196652	-0.328735696	-0.370745548	-0.45706715	-0.549135327	-0.638332906	-0.68566849	-0.796014217	-0.788968003	-0.905671928	-0.921175542	-0.957124869	-0.955810692	-0.985174307	-1.025677488	-0.973633094	-0.982915929
0.11987023	0.198050592	0.306084719	0.380420841	0.488237994	0.554108107	0.645419213	0.710723129	0.74336942	0.840490934	0.86473298	0.910491109	0.950968833	0.980255227	0.998545539	0.989133692	1.017131534	0.997327538	0.939290317	0.92496385	0.859599723	0.847924252	0.772144706	0.68925648	0.60665276	0.557776469	0.495557371	0.338545317	0.311240231	0.194737151	0.09872263	-0.003075927	-0.091176062	-0.203241965	-0.27909738	-0.38038384	-0.471655432	-0.586006981	-0.643169643	-0.730839717	-0.798388781	-0.835296568	-0.907788932	-0.902621855	-0.964024817	-0.97223664	-1.005396133	-0.987252061	-0.996563817	-0.99434528
0.109231403	0.198217849	0.287731768	0.405985447	0.490328177	0.535359108	0.59634091	0.695059365	0.76647038	0.811157128	0.875759467	0.902587806	0.952078838	1.008636638	1.000397355	1.019684525	0.991286231	0.928092208	0.958219677	0.933422411	0.858245919	0.817282234	0.790986604	0.715714562	0.245142192	0.541424483	0.462443872	0.402720989	0.307679914	0.200920855	0.098433026	0.021696356	-0.078599237	-0.178971355	-0.267960101	-0.362548526	-0.506573086	-0.533650876	-0.651929398	-0.677160535	-0.776374407	-0.843534435	-0.840033224	-0.938678942	-0.970354007	-0.975420921	-0.98126951	-1.012705128	-0.99985924	-0.981594841
0.125797223	0.192592749	0.282886612	0.353558137	0.480476463	0.520810229	0.63939823	0.725574469	0.780914139	0.829439054	0.83843557	0.915919419	0.969142494	0.999275802	0.958367338	0.979210383	0.970303866	1.015363165	0.941244992	0.904390178	0.886608763	0.855843707	0.783259868	0.708740319	0.34562532	0.544412282	0.487836073	0.414338279	0.279822524	0.187745745	0.091440957	-0.017626054	-0.125705258	-0.169896151	-0.298083608	-0.397218898	-0.490326642	-0.544474709	-0.622022521	-0.691559278	-0.787309491	-0.838519507	-0.849663204	-0.91116329	-0.929038928	-0.993005268	-1.01505949	-0.952571618	-0.978846431	-0.968854447
0.077910461	0.214700855	0.289937187	0.381544474	0.472101211	0.555774705	0.663396466	0.695593744	0.791589921	0.860138682	0.89017438	0.959121176	0.981811739	1.011591497	1.047488249	1.037652215	1.009370356	1.006614223	1.007600366	0.983859031	0.939261843	0.856858676	0.802025707	0.73794474	0.6746707	0.605980301	0.484138163	0.400823019	0.30171597	0.202828094	0.113840229	0.019621406	-0.102310527	-0.225688384	-0.310651103	-0.421777352	-0.492061753	-0.591892361	-0.682485954	-0.765553706	-0.815480854	-0.896482487	-0.957890723	-0.980759421	-1.065493932	-1.057279541	-1.05338941	-1.087796192	-1.074863095	-1.087354489
0.109485008	0.211838747	0.269801378	0.406444247	0.459936512	0.568236459	0.631579649	0.743678189	0.759576609	0.883889987	0.901813813	0.93630312	1.00624144	1.023134679	1.014548352	1.012238154	1.017701228	1.025676065	0.970015422	0.968450607	0.914779186	0.891635284	0.783318477	0.7293087	0.637487712	0.583023499	0.486555991	0.391770776	0.324099062	0.184554423	0.088344081	-0.012314878	-0.073078062	-0.256443174	-0.31938607	-0.385465952	-0.522670407	-0.582833176	-0.675074599	-0.726818295	-0.825417855	-0.884618204	-0.915279469	-0.978547814	-1.066368727	-1.026602717	-1.052391442	-1.079223959	-1.083954596	-1.0750334
0.088830299	0.199558709	0.271060891	0.373683303	0.477680704	0.548614902	0.594002705	0.737999361	0.762905966	0.846274483	0.875621654	0.919384843	0.981986359	1.009164552	1.000855285	0.982428261	0.966708375	0.983701783	0.924033271	0.888212813	0.896006738	0.800287112	0.757740901	0.688096554	0.635510008	0.515644473	0.481336919	0.398431226	0.323187641	0.221101642	0.112950852	0.003058595	-0.052453114	-0.229471705	-0.258561469	-0.34895677	-0.484464523	-0.599560696	-0.629084348	-0.68554479	-0.794315553	-0.83619873	-0.898578776	-0.961861355	-0.95960349	-0.999536032	-1.027212473	-0.993748652	-0.955662438	-0.971499056
0.055105826	0.178406878	0.327114488	0.375046029	0.444637964	0.590500127	0.6631153	0.738493003	0.73716578	0.853129079	0.859503409	0.937918402	0.966131212	0.985547466	0.981858063	0.97902137	0.998787526	0.978150978	0.940743032	0.950461313	0.909399284	0.830386786	0.733735795	0.695815365	0.953308191	0.561389173	0.457695861	0.395640078	0.298287271	0.186769622	0.085950636	0.004162094	-0.090005563	-0.188175321	-0.300306804	-0.384704448	-0.470545755	-0.538853176	-0.62861003	-0.68339969	-0.797068543	-0.836365129	-0.893143389	-0.89568111	-0.999720081	-0.974802011	-0.996193038	-1.002008903	-0.952442617	-1.04430633
0.056803915	0.174195193	0.268896943	0.375640503	0.488719823	0.564709336	0.625756709	0.749467046	0.807270187	0.883417922	0.869475482	0.9263173	0.941716316	1.015399372	1.006423492	1.022899287	1.048662259	1.034494615	1.015444367	0.959162271	0.908156411	0.881743146	0.791790687	0.728761646	0.704072941	0.554169092	0.497191965	0.405476606	0.316059731	0.217232698	0.104828441	0.003146466	-0.130275296	-0.234287988	-0.353875614	-0.392826642	-0.514532446	-0.573229038	-0.687978853	-0.791416634	-0.820370647	-0.906356518	-0.981284286	-1.00191651	-1.051413711	-1.1060219	-1.097444242	-1.065084143	-1.092081324	-1.074421583
0.07527379	0.196322583	0.280701737	0.391480018	0.468851202	0.559335035	0.654668067	0.684289191	0.772392859	0.805434465	0.870954918	0.916566678	0.948124979	0.995695158	0.995468696	1.020088154	0.991848173	0.983396816	0.948371179	0.921386215	0.874890356	0.842429266	0.797588401	0.711230502	0.635431245	0.545521108	0.475263106	0.375879866	0.296531283	0.205697918	0.1200543	-0.002591002	-0.099142921	-0.201503799	-0.295646195	-0.349115679	-0.471091437	-0.561569792	-0.624985608	-0.709074705	-0.755199086	-0.834254094	-0.877738612	-0.930131452	-0.958115895	-0.990705538	-0.99917472	-0.985143393	-1.015257451	-0.951471262
0.018705205	0.092354316	0.185339822	0.270248523	0.345439893	0.405559667	0.456215498	0.486822249	0.521821078	0.546362674	0.623884928	0.685248969	0.815159921	0.872401719	0.92335834	0.980288302	0.945654016	0.871469487	0.811717542	0.688665876	0.596385348	0.542475611	0.499612326	0.503841776	0.465117133	0.414835584	0.372222289	0.268032078	0.186020596	0.0862781	0.026534105	0.010773081	-0.012156254	-0.092164672	-0.207405826	-0.253886963	-0.351460052	-0.398090599	-0.460140513	-0.494038808	-0.535377831	-0.53719933	-0.588745614	-0.707220558	-0.771179883	-0.865614788	-0.923373977	-0.968594091	-0.941838906	-0.876052019
0.046656272	0.198142817	0.366159838	0.523463078	0.594810597	0.542656283	0.38326637	0.145540377	0.077803287	0.247124832	0.286427224	0.230398836	0.091777559	0.094478608	0.256162334	0.298860293	0.255048264	0.10242977	0.086212898	0.229329284	0.297220161	0.257704192	0.078093135	0.152554286	0.382496666	0.537565381	0.590210079	0.531363582	0.361888217	0.193385667	0.072690167	-0.00941285	-0.057900252	-0.194032312	-0.381148545	-0.513531365	-0.600150806	-0.534837531	-0.380278632	-0.148534823	-0.080394751	-0.233564601	-0.313501977	-0.228491108	-0.078388487	-0.090242754	-0.245196057	-0.284074111	-0.252484537	-0.116254439
0.083433459	0.139202615	0.302104853	0.370249767	0.444683479	0.500257832	0.620952262	0.677169133	0.765817317	0.821191229	0.890185194	0.936892962	0.992817156	0.985882782	0.97903118	0.965155891	1.00724853	0.938043979	0.94894853	0.974928321	0.912435686	0.843005019	0.799945036	0.714738845	0.466101539	0.578055613	0.476185822	0.376007373	0.309414381	0.196208139	0.098077958	0.016104784	-0.109059801	-0.185300882	-0.272991811	-0.372836388	-0.490133239	-0.580049574	-0.642467644	-0.730934593	-0.783480845	-0.843212005	-0.863748837	-0.922975554	-0.935983574	-0.97324161	-1.030575213	-0.978629438	-1.033481358	-0.988180995
0.076975768	0.27919462	0.509803177	0.689626606	0.788546693	0.698915151	0.526261318	0.43633732	0.654273265	0.884466382	1.028939138	1.034287606	0.9928157	0.946598392	0.922337887	0.912666152	0.924096711	0.90242681	0.967881597	1.048779049	1.005529418	0.904534043	0.630941563	0.465448461	0.5041206	0.694858405	0.794992358	0.685788609	0.517117833	0.289403078	0.077434129	0.011624462	-0.065916857	-0.226155717	-0.49086664	-0.711218203	-0.772773361	-0.706079098	-0.535234729	-0.446195594	-0.661614363	-0.862570947	-1.025888693	-1.039528062	-1.002833473	-0.940962434	-0.941203959	-0.913836041	-0.907243954	-0.9113636
0.034813139	0.070258548	0.174047568	0.266604289	0.308311094	0.397650586	0.45670076	0.527155268	0.520148982	0.58725863	0.675731119	0.716973228	0.795924972	0.881207858	0.941199425	0.966995665	0.960879721	0.915713669	0.785536783	0.727638508	0.640639496	0.608743402	0.527018888	0.461333172	0.440535897	0.40957857	0.345805818	0.2749529	0.175907164	0.070276033	-0.012724308	0.030973672	-0.050396271	-0.056646777	-0.165302899	-0.245139462	-0.360695942	-0.432993607	-0.429276056	-0.494830092	-0.527072132	-0.610288488	-0.642849122	-0.740883902	-0.807371332	-0.922317277	-0.925397161	-0.996944031	-0.944819693	-0.885596712
0.106420049	0.157755138	0.309456253	0.369290307	0.499521725	0.556049688	0.57609904	0.725723352	0.797206155	0.812761956	0.841603857	0.932296967	0.954947239	1.014603128	1.001957128	0.992601044	0.988427698	1.021876434	0.957683676	0.912352833	0.860518453	0.865333305	0.767549196	0.730656899	0.501114543	0.559814013	0.453031016	0.40944011	0.306008183	0.170203174	0.11810032	0.021572533	-0.057966717	-0.186976034	-0.255886897	-0.384987151	-0.45179775	-0.532678843	-0.647131209	-0.708667691	-0.791030875	-0.821447677	-0.924502059	-0.94260641	-0.924660077	-0.950589596	-1.001641084	-1.009079477	-1.016969784	-0.945535646
0.118858366	0.200251962	0.318488779	0.412497576	0.46726007	0.537778835	0.621212348	0.716937298	0.776027247	0.824215574	0.862089483	0.922053484	0.984570026	0.969572444	0.96867977	1.02483167	0.983465078	0.994109047	0.935983408	0.930328228	0.909476303	0.847323485	0.774459838	0.702268447	1.070178033	0.584973471	0.444018973	0.406457709	0.308828979	0.193217438	0.078138396	0.006149973	-0.099794457	-0.166239536	-0.291695146	-0.399784968	-0.476986299	-0.547731778	-0.617870085	-0.748643748	-0.775539397	-0.807146144	-0.887561619	-0.949228054	-0.997079532	-1.01038326	-0.967321775	-1.024303783	-0.978057374	-0.985525132
0.118555497	0.204611009	0.308854748	0.388850324	0.469326764	0.57293763	0.637791395	0.720534976	0.785883034	0.831050875	0.882996169	0.898277908	0.99763768	0.977329037	0.955713088	1.001049452	0.955020994	0.993261839	0.939827907	0.92143791	0.885780655	0.828315696	0.747811183	0.710485963	0.642237537	0.547532446	0.476284943	0.403283509	0.290677054	0.229794259	0.11684434	-0.014366413	-0.065676346	-0.178537119	-0.302919631	-0.354086499	-0.483397749	-0.584147076	-0.608066739	-0.720400183	-0.728677993	-0.831405651	-0.88452179	-0.911831597	-0.948986748	-0.929312768	-0.978207857	-1.027256618	-0.98045989	-0.982832599
0.109465058	0.164501483	0.312096093	0.407921259	0.494976535	0.599974809	0.62709179	0.715411488	0.812139098	0.904961081	0.868205778	0.943738706	0.962503499	0.996879221	1.014534379	1.022473344	1.029348889	1.023679181	0.981270341	0.948927254	0.898664048	0.837832298	0.795739888	0.733676335	0.654705644	0.609163647	0.492655341	0.385526848	0.264773756	0.191116084	0.129190142	0.018620107	-0.071472564	-0.219178181	-0.318807085	-0.340128368	-0.533844602	-0.579619739	-0.69440163	-0.721055722	-0.849049194	-0.863740301	-0.953553818	-0.999548803	-1.004714757	-1.049433275	-1.089225856	-1.059169907	-1.062566056	-1.019880502
0.225531475	0.464383082	0.571073312	0.705548029	0.760725515	0.711246129	0.745014337	0.737611345	0.646145149	0.700171503	0.679811746	0.752839869	0.884177775	0.92377003	0.984219549	0.996041315	0.973640063	0.936820749	0.852979134	0.801035034	0.707148717	0.711595645	0.665978475	0.759145536	0.704395283	0.75551168	0.76346185	0.669723482	0.603625749	0.421065522	0.243982667	0.024604104	-0.271910345	-0.410359138	-0.541197306	-0.665768841	-0.737418552	-0.692330404	-0.681919647	-0.619353428	-0.61630912	-0.640212059	-0.69324281	-0.69534516	-0.761986711	-0.837195893	-0.883441037	-0.902054799	-0.883860232	-0.8285921
0.034493726	0.125869324	0.276011862	0.383550084	0.461649113	0.507838217	0.504672897	0.442721064	0.385529998	0.366252211	0.373191929	0.468083669	0.594793215	0.720890443	0.841647485	0.879134187	0.820692507	0.743270427	0.59751548	0.46428759	0.394879311	0.347293011	0.387155075	0.414039044	0.475505068	0.503276918	0.460655836	0.406286364	0.272584583	0.12909723	0.014638003	0.012753639	-0.047382574	-0.154254949	-0.245246379	-0.380595101	-0.466774561	-0.520986349	-0.469792799	-0.441159198	-0.343643754	-0.384013233	-0.377804755	-0.48492248	-0.641227808	-0.731413267	-0.816420682	-0.850386941	-0.833078773	-0.746286497
0.099271449	0.162104182	0.337792637	0.396058101	0.490395594	0.535238376	0.598628807	0.76018044	0.772236949	0.851145165	0.906326557	0.876021454	0.987706154	0.93221732	1.029876151	1.01697646	0.992555896	0.956618233	0.97323746	0.963122326	0.95203158	0.808639241	0.785719849	0.733654286	0.600177643	0.544029149	0.440212997	0.312802801	0.272631605	0.144867174	0.064427449	0.023793887	-0.095311301	-0.197009507	-0.271123335	-0.364993924	-0.460873368	-0.617240912	-0.633001612	-0.76566227	-0.795377326	-0.742562444	-0.882898106	-0.924739638	-0.907688611	-1.011264299	-0.94281152	-1.028058543	-0.998681509	-1.017073647
0.080490528	0.205037031	0.310142591	0.411040242	0.482569649	0.555797796	0.649548242	0.711133072	0.756822321	0.831895779	0.884839862	0.93842467	0.963007376	0.998796395	1.013068707	0.972045154	0.978719564	0.987070437	0.939612776	0.935956005	0.862234505	0.814729546	0.772144026	0.686645966	0.636521981	0.580291913	0.458009267	0.389421561	0.286381957	0.181309583	0.099153086	-0.000757267	-0.076953965	-0.211403475	-0.281996037	-0.35704395	-0.456998158	-0.572212633	-0.629055484	-0.737215736	-0.756230332	-0.825815404	-0.894892235	-0.923138019	-0.972536058	-1.008017256	-0.985122928	-0.993987411	-1.007519523	-0.986760088
0.070344373	0.187678528	0.282756952	0.349890633	0.476209652	0.556957174	0.621244192	0.717712913	0.76611479	0.854324253	0.883922347	0.912033827	0.955500164	0.971969615	0.987489254	1.009301942	0.96544447	0.971895852	0.95371456	0.93824517	0.893715669	0.797903455	0.783052812	0.705443959	0.621510636	0.577738615	0.462446079	0.387706634	0.265944888	0.187262355	0.107176458	0.026786476	-0.083059217	-0.199865321	-0.281214003	-0.370237805	-0.473774602	-0.583149445	-0.628324809	-0.706570732	-0.794163753	-0.822649053	-0.887681841	-0.915265331	-0.958633427	-0.974970625	-1.038588824	-1.004822981	-0.975152511	-0.987079039
0.20644868	0.402998877	0.540150902	0.635358727	0.719812285	0.715081726	0.711036789	0.700227058	0.671758444	0.70770245	0.776636291	0.818449842	0.882212406	0.928678715	1.005436228	1.017981841	1.003717607	0.952335041	0.876654013	0.84375462	0.716206639	0.710824833	0.70513374	0.728416087	0.740520794	0.738371083	0.727186997	0.633426196	0.568435383	0.422550628	0.208642046	0.025561543	-0.194859489	-0.413329883	-0.512355761	-0.639667732	-0.658525932	-0.689099023	-0.668491354	-0.697375982	-0.617139002	-0.648272106	-0.697438798	-0.731638857	-0.785423922	-0.893748289	-0.847506872	-0.898613267	-0.869381309	-0.822776757
0.120159617	0.189950653	0.3297235	0.381724669	0.50011322	0.552171563	0.606329439	0.715080408	0.794064769	0.859817287	0.875405853	0.915582535	0.96480564	0.984575231	0.989860216	1.00490305	0.959804236	0.986391091	0.950561492	0.932686193	0.877711781	0.81859006	0.780019823	0.727508305	0.635250627	0.567720503	0.498481792	0.373829348	0.300289352	0.192097852	0.096187947	0.012417955	-0.09836236	-0.196075778	-0.272135543	-0.39345939	-0.486509119	-0.560350767	-0.636308799	-0.704857821	-0.760700402	-0.835519018	-0.88606907	-0.933732058	-0.970885215	-0.990124276	-1.006800853	-1.013414951	-1.023877419	-1.008085541
0.091692255	0.181647898	0.289126052	0.4018919	0.48368982	0.544886916	0.630706814	0.684699177	0.801277615	0.834799141	0.858286147	0.956835041	0.924654582	0.985071816	1.011569259	0.990331668	0.995137391	0.992012158	0.943473783	0.923448551	0.882266859	0.836493551	0.787364919	0.720660301	0.617694778	0.577671695	0.490912184	0.384853468	0.282127224	0.19785017	0.114798315	-0.03078269	-0.091510144	-0.188953103	-0.262088445	-0.371046081	-0.470701678	-0.533519414	-0.687800473	-0.672459652	-0.748929333	-0.81949328	-0.886633857	-0.960446077	-0.949060655	-0.969782954	-1.018128698	-1.024483385	-0.957721618	-0.978185315
0.113509805	0.190515927	0.292282129	0.378875711	0.519196802	0.573604785	0.673006462	0.714766363	0.798525009	0.849479385	0.922704891	0.943324702	0.986603607	0.975964884	1.034325633	1.03236882	1.026250771	1.013939213	0.977129029	0.9774413	0.912622594	0.839183483	0.81713348	0.734314231	0.634646504	0.585568495	0.482396608	0.395783463	0.303676356	0.196988506	0.112808316	-0.021646437	-0.075794344	-0.192762372	-0.327793069	-0.42897492	-0.510835132	-0.609074799	-0.697573499	-0.734784189	-0.845787965	-0.905375119	-0.957357337	-0.993391676	-1.042581834	-1.092908068	-1.077941613	-1.080857992	-1.107454546	-1.069468461
0.029333944	0.092043514	0.268447708	0.373881385	0.471939672	0.503182661	0.475726989	0.423586536	0.3937169	0.360583573	0.420566263	0.499276527	0.625841226	0.760395224	0.855361185	0.869807506	0.860469403	0.751953007	0.622948372	0.526539648	0.416060992	0.399081684	0.392147579	0.422775918	0.490507202	0.484883175	0.46160106	0.345702063	0.244030447	0.133987166	0.037358548	0.043977642	-0.047226214	-0.123037989	-0.228869007	-0.371875344	-0.451456901	-0.499451396	-0.493565617	-0.431687618	-0.389233416	-0.388335021	-0.418278802	-0.494553684	-0.611890803	-0.746919627	-0.834132072	-0.870790525	-0.848985768	-0.748360147
0.228131456	0.407024531	0.564248422	0.641154608	0.738279642	0.783752119	0.749225066	0.720904224	0.702680097	0.671727346	0.694411042	0.781712773	0.859518931	0.920984688	0.970409611	1.017010464	0.972466528	0.984570548	0.865753655	0.79662385	0.763446879	0.704116677	0.6929698	0.709328331	0.722397051	0.742609312	0.785673038	0.696769391	0.550279804	0.427401075	0.231495402	0.029498807	-0.226047233	-0.436169749	-0.523071006	-0.661888439	-0.730141769	-0.705722765	-0.695673783	-0.640332185	-0.62308772	-0.659716673	-0.653460029	-0.702329509	-0.75011342	-0.846215845	-0.89611944	-0.876379107	-0.883971512	-0.829479022
0.090294359	0.186968506	0.306856587	0.37819075	0.523239842	0.54740853	0.711820624	0.71406875	0.760183989	0.839037291	0.84539494	0.910698407	0.960860069	1.024414547	1.081715267	1.03350633	0.956241448	0.997008906	0.945638245	0.922343796	0.889146743	0.79281382	0.787675302	0.731333616	0.622742217	0.525316264	0.472535688	0.433724842	0.265394707	0.181752938	0.10011078	0.031330152	-0.057273979	-0.157825705	-0.251597352	-0.39130875	-0.444763531	-0.536398231	-0.60944093	-0.703653906	-0.763446574	-0.857173509	-0.831953702	-0.93551702	-0.965951636	-0.949204223	-1.013015175	-1.026358927	-0.980010476	-0.959863758
0.050683081	0.131578679	0.256714982	0.384040367	0.500210878	0.486114104	0.496685869	0.391362759	0.336076299	0.283817217	0.343441193	0.415075915	0.530866877	0.710797446	0.805524157	0.816790192	0.807424694	0.698397378	0.538539312	0.425777586	0.351281311	0.312104357	0.361445346	0.414008904	0.455352699	0.514466389	0.501361676	0.37479089	0.25863662	0.167590961	0.040084726	-0.018142919	0.011279718	-0.125058697	-0.258345647	-0.398293634	-0.472062653	-0.48644697	-0.463870954	-0.416537939	-0.356158832	-0.31826018	-0.297200323	-0.41036628	-0.503090272	-0.715765407	-0.802978902	-0.806222702	-0.802380541	-0.679225711
0.094480976	0.231614042	0.253870255	0.363589683	0.453966004	0.561897998	0.625605511	0.715516976	0.790321983	0.810423935	0.871108468	0.893520938	0.922437952	0.968756372	0.985766597	0.985841757	1.009522657	0.980562626	0.993049631	0.941731875	0.888245951	0.820984505	0.749984823	0.738322752	0.650520729	0.568136775	0.447642621	0.394289234	0.284700782	0.220535409	0.096023724	0.019023103	-0.11204057	-0.183227384	-0.269506469	-0.418757396	-0.465890378	-0.530048811	-0.626879041	-0.700304458	-0.786851118	-0.816405924	-0.899543117	-0.934615024	-0.96351239	-1.003508113	-0.987787943	-1.000663312	-1.02348129	-0.972015691
0.037180178	0.129394048	0.238671606	0.391828924	0.473534956	0.472030822	0.476502906	0.435958153	0.394558581	0.345012115	0.378213577	0.482755115	0.588618265	0.720388133	0.815464889	0.856074573	0.826640942	0.734830935	0.602791731	0.456588247	0.390707201	0.362863041	0.348374928	0.453500779	0.480430191	0.490779172	0.458435342	0.397417726	0.246203999	0.110887491	0.039498758	0.002508172	-0.042442158	-0.137581247	-0.262467148	-0.371152645	-0.472567204	-0.508874986	-0.47260766	-0.427594325	-0.383359229	-0.320881446	-0.365048208	-0.47411081	-0.587236288	-0.726078493	-0.795689501	-0.856231446	-0.784633312	-0.722239902
0.122291393	0.205698053	0.262910721	0.376639343	0.4929058	0.593706564	0.64234559	0.720884543	0.749484114	0.816467071	0.85300821	0.930322846	0.977029525	0.953318734	0.990680955	0.996200392	1.006001548	0.968876766	0.928480867	0.948730073	0.897673975	0.856332958	0.819658269	0.688588456	0.978051387	0.605553706	0.48480959	0.38409422	0.265048987	0.164096571	0.099159736	-0.010624981	-0.091459446	-0.208411284	-0.296668661	-0.353289594	-0.4646266	-0.54799917	-0.614335971	-0.706014424	-0.755982852	-0.795272545	-0.910492733	-0.911035576	-0.944278787	-0.978935441	-0.975992217	-1.00396571	-1.033591532	-0.994742237
0.040002164	0.1701952	0.358332992	0.495730517	0.579880719	0.528741043	0.462615959	0.309012118	0.143298094	0.013730182	0.014511964	0.097731348	0.244876782	0.415674225	0.518895812	0.599909799	0.543519638	0.408822571	0.239165142	0.100666798	0.005176741	0.025397508	0.126020704	0.28889758	0.441675319	0.564411307	0.561704527	0.48425244	0.348278594	0.168222278	0.064035814	0.004711851	-0.0514533	-0.161265811	-0.333043515	-0.47750921	-0.564714717	-0.552990891	-0.441584407	-0.296995933	-0.135146176	-0.035063395	-0.005057862	-0.084257215	-0.236210593	-0.401866674	-0.516488151	-0.592506634	-0.520224512	-0.407843175
0.065476366	0.205469669	0.338621729	0.4190073	0.489979241	0.552512373	0.580807662	0.72560328	0.800580881	0.821744294	0.865382803	0.916990252	0.955566378	0.958486596	0.98468074	1.007430777	1.021266433	0.992906208	0.969662978	0.929318466	0.832315936	0.8334566	0.824453638	0.706569445	0.651850425	0.551584143	0.488527831	0.391636661	0.313410572	0.171529877	0.05786664	0.003799137	-0.095608949	-0.16906101	-0.306628178	-0.378140239	-0.442761921	-0.555131044	-0.577208994	-0.73718438	-0.768994056	-0.809058259	-0.901230642	-0.950642505	-0.946432217	-1.022712361	-0.975187379	-0.951032572	-0.943669276	-1.008578245
0.122547306	0.192237726	0.268968967	0.397134527	0.489015474	0.558718302	0.646010541	0.709187278	0.787467197	0.818917826	0.911314781	0.920784215	1.004444286	1.034441501	1.030376704	1.013082606	1.021249248	1.005477365	0.977981635	0.984924503	0.943629495	0.894802744	0.844416256	0.701636283	0.664794605	0.565916084	0.512943216	0.381099067	0.308211783	0.20356427	0.10153944	-0.005173214	-0.101618192	-0.187095898	-0.274372439	-0.393467935	-0.504581224	-0.59371085	-0.666950372	-0.744312588	-0.838991382	-0.89943642	-0.937604817	-0.959375042	-1.035645829	-1.05065295	-1.078747227	-1.082020421	-1.085928756	-1.072251153
0.049398998	0.194346781	0.362843011	0.49598425	0.56856243	0.490674246	0.333604527	0.085322211	0.15480616	0.312689685	0.388242129	0.335061464	0.194381921	-0.01085122	0.09598601	0.180664243	0.138890992	-0.012643364	0.190011361	0.337115075	0.421337069	0.324317944	0.154069357	0.100611892	0.337605165	0.520110137	0.561273011	0.515368209	0.393461191	0.200898068	0.045436375	0.01930979	-0.021698002	-0.195526981	-0.370486172	-0.528562273	-0.584332554	-0.518087473	-0.33167633	-0.066049544	-0.170806421	-0.334587005	-0.400714348	-0.332930657	-0.196403605	-0.018184115	-0.131918289	-0.18220658	-0.139822369	-0.01529335
0.092217398	0.166251401	0.293219366	0.401231663	0.470198807	0.55487395	0.67367573	0.727997146	0.787285046	0.86339999	0.920219306	0.943411351	0.99548298	1.019417616	1.048018821	1.043610076	1.018708011	0.98567672	0.98627388	0.987754552	0.924186746	0.84255321	0.815663534	0.749830165	0.667039712	0.561007601	0.515287611	0.425378534	0.279788301	0.226608463	0.13699775	0.015390451	-0.155745283	-0.240776029	-0.32305529	-0.423655877	-0.449391381	-0.573341586	-0.692220729	-0.754709265	-0.8298296	-0.861538503	-0.979977416	-0.983456064	-1.021154911	-1.050598192	-1.024874085	-1.075365685	-1.079155869	-1.056311401
0.12398908	0.293448645	0.295510453	0.378890013	0.43599704	0.550702247	0.652402741	0.731357217	0.770877319	0.896821744	0.899682041	0.941126883	0.94940876	0.976181663	1.010582427	1.012744071	1.044233136	1.007779989	0.969549859	0.973909574	0.931540416	0.859163547	0.818346661	0.745445031	0.672400745	0.529220779	0.509717708	0.387339571	0.301306157	0.169087361	0.117157145	0.001713497	-0.097718491	-0.199759069	-0.292545248	-0.426754895	-0.47971923	-0.616979437	-0.740526871	-0.78483644	-0.808553427	-0.900242322	-0.927482221	-1.025586879	-1.05076328	-1.041166014	-1.081227645	-1.10143705	-1.098854683	-1.054969673
0.07071912	0.20623256	0.314218962	0.426093907	0.441775657	0.550632536	0.627217825	0.747588334	0.804597763	0.815302446	0.903566454	0.945154023	0.969317261	0.996297985	0.975535262	0.987008969	1.010837977	0.988478371	0.974054072	0.904955641	0.919106249	0.828625988	0.783028892	0.714290023	0.651380705	0.508106962	0.4746952	0.366051656	0.310397339	0.203211152	0.094707255	-0.01988239	-0.140642559	-0.200056454	-0.254501751	-0.410625728	-0.460568339	-0.516202048	-0.664616543	-0.741448423	-0.805574132	-0.849552464	-0.873571872	-0.955254525	-0.945875373	-0.973143663	-1.009140826	-1.008799132	-1.004968972	-0.960058413
0.103363382	0.172094732	0.306499098	0.348982945	0.490010652	0.581043618	0.60593021	0.730038234	0.784130832	0.895415733	0.896746256	0.876427026	0.963670341	0.988671065	0.994804421	1.009160946	1.00224244	0.974053491	0.954761874	0.947922854	0.865714324	0.825190829	0.776095485	0.73869763	0.665507496	0.56164623	0.413612137	0.380460412	0.254414736	0.220493981	0.116286879	0.052036123	-0.038097469	-0.218459363	-0.286641179	-0.395634145	-0.44348688	-0.536261459	-0.627793084	-0.712294896	-0.755333615	-0.853077649	-0.850302845	-0.910539617	-1.003266215	-0.997365829	-1.009545885	-0.998818109	-0.980371113	-1.002977915
0.089693274	0.17506768	0.282463244	0.404423092	0.488153745	0.540045745	0.650378032	0.709195112	0.798312658	0.774460341	0.891135915	0.896701568	0.999498367	0.9880214	0.956355761	0.973839779	1.01739067	0.97737808	0.964670048	0.874608552	0.823687695	0.827895666	0.757888613	0.729783836	0.634295859	0.580947469	0.471867396	0.364815508	0.287041371	0.193763965	0.122127084	-0.010892542	-0.08715114	-0.210270255	-0.253730315	-0.358652396	-0.460388356	-0.600240082	-0.637984754	-0.701365194	-0.754123241	-0.801669796	-0.917583491	-0.957109679	-0.990906253	-0.971244881	-1.002375434	-0.975131787	-1.016519699	-0.969114741
0.075929124	0.175696042	0.299495885	0.355146916	0.466480982	0.574783083	0.600122834	0.703087244	0.778240966	0.844106497	0.895254291	0.927135456	0.909726926	0.989579552	0.97759472	1.008958427	0.971949492	0.986681038	0.95699613	0.912720856	0.86043948	0.838171544	0.753270819	0.688387375	0.990389014	0.580555536	0.468541909	0.379664988	0.28442636	0.210796003	0.12668645	0.018514337	-0.106280799	-0.205140863	-0.252682435	-0.429612693	-0.471137945	-0.538420988	-0.611203456	-0.706009417	-0.749617847	-0.811218607	-0.858791689	-0.861154211	-0.955050715	-1.001317141	-1.00768123	-0.996259362	-0.95569631	-0.963511312
0.010530928	0.122599458	0.276222518	0.382743985	0.443560966	0.486968682	0.47524843	0.431413319	0.381586322	0.368511349	0.387805347	0.479553146	0.60439967	0.715540006	0.821135119	0.851565635	0.810407397	0.691651382	0.612255113	0.474010299	0.4108064	0.367688553	0.377565244	0.436710327	0.470852826	0.505981462	0.471901489	0.39325356	0.272377899	0.142960543	0.040144805	0.007290357	-0.058471905	-0.142153187	-0.246434626	-0.368787385	-0.464456995	-0.496923227	-0.483084817	-0.424629304	-0.351687013	-0.365600865	-0.379313357	-0.463355472	-0.572379003	-0.7362742	-0.823258578	-0.851919777	-0.813887026	-0.742720177
0.096061564	0.197426177	0.292818817	0.409026379	0.460225695	0.571772573	0.625556661	0.716258435	0.790920676	0.860741991	0.923586555	0.942111393	0.996232938	1.001535256	1.027923696	1.004765745	1.044827205	0.999491286	0.963977863	0.987329837	0.923835912	0.877079355	0.815203711	0.738390315	0.675455674	0.577682449	0.487696523	0.422615446	0.326390277	0.210711048	0.112784747	0.003621252	-0.112776151	-0.237832762	-0.305665379	-0.43143899	-0.482730085	-0.580343977	-0.665776055	-0.767201978	-0.815108156	-0.898265126	-0.952943493	-0.973024096	-1.031889748	-1.064584109	-1.066238507	-1.079333278	-1.087753463	-1.054065978
0.109529793	0.161189028	0.285658633	0.419457142	0.465996768	0.538288054	0.618487343	0.672200571	0.752170447	0.833352295	0.838754899	0.953106972	0.933325728	0.986773605	0.965207775	1.005860377	1.012786375	1.015287722	0.952653696	0.960034267	0.877069312	0.835324064	0.741637155	0.707644733	0.333801739	0.537363828	0.457569082	0.387685566	0.30205733	0.19511502	0.109635302	-0.010334637	-0.078278659	-0.219521072	-0.253748199	-0.38621086	-0.461577444	-0.571120086	-0.632840004	-0.728041375	-0.77410365	-0.864906505	-0.856967508	-0.891327969	-0.937739153	-0.939846615	-0.976121668	-0.992084742	-0.976284305	-0.959840468
0.113874248	0.222292537	0.273211824	0.388474098	0.473063005	0.534092951	0.613833848	0.712591759	0.768021377	0.868526175	0.872437734	0.960011949	0.94240498	0.995858167	1.000129865	1.066352815	1.029862103	1.013625091	0.973597254	0.962328747	0.894384713	0.842205695	0.793531701	0.710978958	0.641841353	0.572573369	0.482477363	0.362825858	0.293984372	0.163384711	0.081106378	-0.022521194	-0.076046892	-0.235738418	-0.276873765	-0.415597043	-0.493608922	-0.618152579	-0.680812131	-0.747110583	-0.787263466	-0.81998372	-0.911292302	-0.983298521	-1.034118001	-1.016802382	-1.073665325	-1.071107449	-1.029014904	-1.036928682
-0.199508397	-0.012501627	0.29772413	0.315732153	0.343073297	0.481957875	0.779078981	0.988750398	1.022553832	1.020528391	0.944046164	1.149968508	0.934815121	0.989290311	0.918155915	1.124916761	1.240894116	1.073146982	0.903220957	0.885674221	0.742055758	1.006603779	0.601615301	0.635632956	0.592779604	0.266250962	0.494304499	0.679510089	0.395297929	0.288249668	0.391793707	-0.17879213	-0.094639871	-0.251200099	-0.279815749	-0.34390479	-0.844173945	-0.557837609	-0.386316338	-0.921484602	-0.452777366	-0.933314666	-0.966247567	-0.872889158	-0.61306027	-1.074129648	-1.31633624	-1.349249125	-0.756277012	-0.816820713
0.044471612	0.195554304	0.355974222	0.388000524	0.53345225	0.542183309	0.673057555	0.661550325	0.789326163	0.862546327	0.916472569	0.942493985	0.980553397	1.015580679	1.020082321	1.010623351	1.051647267	1.003519923	0.969028033	0.988740392	0.873742217	0.891422602	0.796842565	0.733382126	0.678517748	0.594286146	0.484017339	0.377341825	0.296342601	0.208096836	0.077655005	-0.033668296	-0.071479127	-0.171028956	-0.26846465	-0.396922754	-0.547006745	-0.601819653	-0.717626842	-0.784999167	-0.841566996	-0.892680257	-0.942483385	-0.971204621	-1.038931616	-1.062201397	-1.052526103	-1.007549274	-1.07731856	-1.064538192
0.103471085	0.201726033	0.308388778	0.365668893	0.455880406	0.559022725	0.65093848	0.738685088	0.814858569	0.814948943	0.896727943	0.919139024	0.960656534	1.014727634	1.029375314	1.01639259	1.034778867	1.032509148	0.971885644	0.963917306	0.886105304	0.851917747	0.795651167	0.742756807	0.65627892	0.599783763	0.530006607	0.399268307	0.293834552	0.208143146	0.116168594	-0.020677504	-0.108676159	-0.235576542	-0.338691335	-0.419060789	-0.516250226	-0.573046976	-0.696681006	-0.794833256	-0.837469367	-0.853352951	-0.916223418	-0.969341376	-1.027060928	-1.04744196	-1.043027611	-1.050858134	-1.10779372	-1.086914892
0.050703423	0.131722212	0.280156209	0.369673064	0.511795339	0.497409727	0.492508275	0.409570738	0.330999644	0.308929767	0.348270791	0.437409577	0.577981422	0.682023474	0.80786633	0.816264776	0.803873084	0.670975977	0.534991181	0.417815055	0.359715655	0.320208467	0.34226638	0.417618312	0.496778257	0.514056836	0.490166947	0.398500986	0.281755852	0.149103341	0.039157262	0.014317451	-0.02411906	-0.138634464	-0.251061623	-0.415514709	-0.494120372	-0.533525792	-0.487399453	-0.398281889	-0.351572117	-0.305946534	-0.343777944	-0.423921866	-0.547279808	-0.705665022	-0.785300608	-0.812253684	-0.800424247	-0.706091948
0.087002038	0.183293114	0.295861027	0.348014633	0.499556758	0.610926216	0.635733006	0.729955161	0.779236332	0.810645035	0.860106172	0.95625478	0.992353515	1.043874288	0.990639277	1.072244784	1.061234962	1.024317602	1.023875998	0.967914634	0.898492098	0.876424548	0.828206148	0.724504347	0.63820068	0.626346355	0.526168397	0.408645928	0.33863881	0.24573105	0.080839739	0.010228429	-0.121213257	-0.241606255	-0.290458892	-0.38003792	-0.51641047	-0.597893132	-0.705953466	-0.726874002	-0.806822646	-0.91184463	-0.931012136	-1.024448025	-0.985806649	-1.026295177	-1.043048842	-1.103268476	-1.147822722	-1.020284608
0.106162602	0.193218032	0.285166232	0.37584523	0.507084016	0.548880382	0.62696011	0.698130907	0.761061623	0.79131361	0.910713333	0.893589777	0.991039972	0.985133662	1.006023722	0.943663118	0.991343661	1.002203251	0.951534555	0.921905929	0.860868775	0.8558201	0.736900649	0.67336451	0.465927704	0.55566815	0.478106019	0.401669716	0.328238889	0.198941013	0.077884981	0.002764263	-0.116932162	-0.227801964	-0.287548819	-0.374680313	-0.448173929	-0.55009641	-0.631226686	-0.677921602	-0.795015719	-0.818584725	-0.91278017	-0.941080348	-0.947691302	-1.0169586	-0.999723634	-1.032107368	-0.964527532	-1.017701369
0.097602899	0.17712077	0.283697257	0.386491404	0.466198093	0.542632877	0.612829438	0.704176012	0.749955763	0.824683878	0.864774656	0.934798624	0.975455988	0.981914679	0.990571877	0.982349249	0.974348006	0.9711279	0.988126758	0.909160938	0.830598364	0.849803068	0.773279488	0.733430355	0.63919723	0.512713183	0.453226544	0.379211475	0.278793804	0.178157035	0.110284329	-0.011569131	-0.072314134	-0.217221748	-0.314337662	-0.38432658	-0.464105193	-0.556474277	-0.617187822	-0.679206104	-0.787164263	-0.833500335	-0.864521864	-0.915684069	-0.926894964	-0.963764185	-1.011000641	-1.001803126	-1.016154634	-0.990306384
0.183075631	0.337927567	0.470692623	0.549766288	0.598743795	0.711725919	0.724512055	0.642638175	0.686903423	0.763445225	0.790957964	0.866045463	0.972543585	0.985899969	0.997220759	0.967725934	0.970058315	0.96354706	0.896942348	0.862999591	0.813633353	0.789620807	0.703000357	0.740854625	0.715442408	0.6888818	0.66102636	0.553514299	0.465526447	0.314905018	0.207063214	0.040618747	-0.168150878	-0.329777339	-0.444238671	-0.522618191	-0.632352201	-0.660054371	-0.651449071	-0.651375416	-0.651891606	-0.720573571	-0.740411325	-0.774441379	-0.815431767	-0.85827941	-0.871773427	-0.937497634	-0.921906905	-0.871115656
0.110852904	0.210708337	0.293361704	0.377948859	0.46200007	0.569425023	0.646040526	0.73797752	0.788185501	0.81726495	0.870429518	0.939379549	0.956420629	0.987888077	1.012310058	1.003749841	0.997086229	0.946397733	0.962303129	0.942791833	0.872478809	0.816074189	0.749326706	0.728369992	0.610579619	0.552169702	0.5004792	0.389643577	0.305548104	0.20918512	0.116277854	0.019942746	-0.092526412	-0.186412573	-0.296352258	-0.394660257	-0.49539201	-0.560560423	-0.642777252	-0.71377969	-0.784246408	-0.820751133	-0.893037132	-0.937241663	-0.943051119	-0.980293374	-1.009749353	-0.975384819	-0.998858205	-0.964372088
0.089352076	0.196773513	0.26068025	0.408457809	0.497516473	0.578704382	0.629133953	0.687139105	0.765225921	0.803587711	0.910440068	0.914150267	0.956058228	1.016410125	0.982083642	0.973670205	1.006988476	0.991168256	0.964733607	0.916492751	0.850043481	0.783285008	0.781899048	0.733390011	0.596442759	0.545879367	0.497460844	0.404035378	0.320120514	0.208033069	0.123522265	-0.030672025	-0.090564333	-0.191210255	-0.285777395	-0.40866301	-0.463135017	-0.550581162	-0.63896529	-0.683395218	-0.757820804	-0.788730788	-0.873804446	-0.883110345	-0.933365784	-0.953242803	-0.97414114	-1.028452663	-1.008390582	-0.980827669
0.072244359	0.200934907	0.306431825	0.351741417	0.473531886	0.591649563	0.667166319	0.758813868	0.776733043	0.841737177	0.898077841	0.941661535	1.020749031	0.982824804	1.042497319	1.047849546	1.001998563	1.009076045	0.995130602	0.913050328	0.919128866	0.855902385	0.781683107	0.755456743	0.680245901	0.582924493	0.501157217	0.397529572	0.332505679	0.216411965	0.11045761	-0.012422195	-0.092431216	-0.232971461	-0.334273174	-0.367345368	-0.519680429	-0.598721675	-0.697258244	-0.742389678	-0.819061476	-0.881737919	-0.979284762	-0.992167096	-0.993368284	-1.089435754	-1.087638111	-1.084701821	-1.050333577	-1.092523082
0.051932258	0.188547402	0.304138217	0.367504347	0.508410149	0.581441816	0.673197801	0.72457677	0.765953777	0.881192436	0.90540471	0.923719252	0.973226808	0.99661132	1.034838138	1.034295647	1.062923315	0.988645111	1.000485231	0.973270796	0.937549241	0.834500007	0.805278631	0.750034147	0.687205836	0.595729017	0.481675953	0.412014127	0.356824835	0.209029226	0.078408913	0.003465839	-0.111596707	-0.201355192	-0.340082085	-0.37599059	-0.478492904	-0.573660709	-0.705164095	-0.784552642	-0.853341325	-0.886655172	-0.982531711	-1.039207258	-1.065527128	-1.08325074	-1.120570435	-1.123543379	-1.104698179	-1.07909832
0.010996038	0.099950271	0.166742514	0.278508799	0.330697015	0.401368766	0.444329135	0.464049596	0.500370106	0.537770284	0.613255892	0.713974964	0.760901147	0.870490339	0.918252673	0.979282122	0.947861807	0.877366453	0.784531986	0.702277574	0.601234798	0.51868616	0.523153976	0.503409023	0.449738201	0.402880641	0.334798153	0.264738646	0.125731825	0.092831252	0.037214685	-0.007514822	-0.034749415	-0.104353445	-0.185172695	-0.281654332	-0.367685726	-0.431683134	-0.415182245	-0.470815959	-0.501859097	-0.523586286	-0.606757477	-0.721447002	-0.793188925	-0.89329925	-0.948162048	-0.968916978	-0.937216669	-0.878684189
0.038842755	0.07195784	0.151779716	0.261068336	0.300207589	0.358037433	0.439799392	0.490739749	0.557869772	0.592210642	0.675802815	0.733971373	0.825341128	0.935631351	0.941691578	1.012965709	0.990610723	0.898034738	0.847472966	0.767582272	0.681532921	0.620965464	0.552238992	0.472394138	0.433197376	0.394083565	0.347283742	0.229393581	0.15867864	0.096998981	0.032573911	0.006921222	-0.012058707	-0.06647405	-0.133708883	-0.242589859	-0.300796154	-0.405596774	-0.452021759	-0.478999662	-0.545457232	-0.613069288	-0.648467037	-0.747215813	-0.863330321	-0.928953289	-0.965418575	-0.997475646	-0.952618832	-0.884262802
0.089360688	0.191271394	0.293794583	0.396366763	0.464462264	0.546711305	0.628933898	0.728797317	0.777666266	0.798000684	0.876209896	0.933320853	0.953480566	0.973875229	0.972910494	0.991551021	0.986702892	0.946443454	0.944817995	0.903749488	0.900584362	0.826151995	0.783062708	0.716594541	0.626624786	0.544007305	0.482558098	0.364200908	0.309481229	0.185717798	0.100306348	-0.000540248	-0.083013191	-0.174197179	-0.269214236	-0.384492027	-0.448810451	-0.544710587	-0.61347909	-0.72609318	-0.757739907	-0.809525181	-0.881615961	-0.916894369	-0.963670256	-0.966937736	-0.98732906	-1.007965502	-0.998246379	-0.977173836
0.097920142	0.197064532	0.284871879	0.388047947	0.43497095	0.541325332	0.643178395	0.6961705	0.763338728	0.800839798	0.910721689	0.989239408	0.946827268	0.992575105	0.979554788	1.008518688	1.001692973	0.959467756	0.988637429	0.920602276	0.917364031	0.832581049	0.761933958	0.698322784	0.881989858	0.565199905	0.493059534	0.362394143	0.335701269	0.189748509	0.095744654	0.016402287	-0.078309502	-0.189957143	-0.262013329	-0.359272569	-0.450684634	-0.579837561	-0.648327367	-0.687783784	-0.791049795	-0.854707558	-0.898514707	-0.932568146	-0.946835297	-0.965060994	-0.972030216	-1.021892467	-1.002389924	-0.975726894
0.130798714	0.202391343	0.336608505	0.306211523	0.504125409	0.579088822	0.629023268	0.755977199	0.764068961	0.87007734	0.84659156	0.889986014	0.992842132	0.975884383	0.991038652	1.0168366	0.987766837	0.979720884	0.992635236	0.966891408	0.875139098	0.830041544	0.825164821	0.717935776	0.671449126	0.582032961	0.475279913	0.363638114	0.282626249	0.149292767	0.092095109	-0.037552511	-0.096181038	-0.231368327	-0.276568214	-0.31373928	-0.428973924	-0.552190724	-0.607977341	-0.686218371	-0.806314574	-0.839867721	-0.881269844	-0.925227429	-0.937601212	-0.971497573	-0.90138621	-0.988108596	-1.052331517	-0.954049969
0.128530559	0.167182542	0.292170894	0.395473628	0.483828421	0.606382909	0.623036742	0.736856198	0.794540019	0.839705532	0.895685534	0.874458499	0.974854896	0.950548414	0.971813615	0.955720306	1.025101133	0.955570994	0.946512402	0.928044228	0.858959238	0.849747704	0.785293186	0.713605786	0.379400937	0.525508005	0.440165532	0.407970156	0.322286402	0.175258841	0.077766967	0.046358934	-0.122024763	-0.19478652	-0.282007694	-0.376036252	-0.484610691	-0.565165191	-0.640027461	-0.703581009	-0.773453004	-0.876230299	-0.901675442	-0.923431735	-0.952544514	-0.973554684	-0.951889217	-0.968696655	-0.964889497	-0.990957898
11.55479063	-14.71519906	-29.49492992	8.335175831	7.003562213	1.450379555	6.91755749	14.35983174	1.064003182	-12.35103316	2.18989822	8.634651551	-3.7597077	-5.502029339	8.384731572	11.59743768	15.68316523	-3.944782918	-28.70406285	22.46286128	-5.549877619	-13.74085629	-25.51498257	13.90451917	7.841994857	6.470151465	-13.30432111	-3.092008728	35.73322974	0.662147853	9.149506715	-9.906533047	12.09394403	-22.00565728	9.267096677	-11.78588864	13.57345219	3.110923452	-28.18381687	27.53124439	5.700246638	-4.373386028	3.285392755	-15.73790973	-4.138132212	-26.4271968	23.04659703	16.44729544	-3.104680802	-4.331847561
0.026905318	0.154936953	0.273045164	0.390848762	0.516991535	0.529368109	0.470351053	0.433574237	0.3446321	0.291348468	0.331247888	0.405890052	0.550298816	0.678659419	0.776926766	0.830096144	0.794296101	0.68680889	0.566913941	0.428860945	0.343206627	0.30386684	0.371924428	0.413734868	0.463438799	0.505504716	0.489959689	0.388221978	0.28289765	0.123266823	0.029417722	-0.002840266	-0.039560632	-0.155935852	-0.275062292	-0.394153429	-0.507268771	-0.526855573	-0.47559877	-0.394661301	-0.346899398	-0.31274989	-0.353450255	-0.411027993	-0.546534395	-0.671766584	-0.768665405	-0.825200906	-0.807476157	-0.699075123
-1.595476909	-3.61112906	3.840617644	-23.12095881	0.858199372	-1.117074205	4.885511801	1.869066287	16.59343091	13.20139172	-10.47284753	0.972761748	-2.31061277	-9.578649504	-2.465336028	-6.182779059	6.077835932	1.013438025	-14.56192699	-9.312304262	4.300141658	8.766144114	0.30044042	9.464731044	-1.280582326	-11.53444156	4.599081494	-0.235480921	-8.294735961	-8.866462273	14.08120793	8.638599442	-0.131815988	-0.420710621	-4.773364332	4.242357775	6.412391232	6.292982241	7.436156059	9.206921016	1.673458296	9.832503251	-10.01953987	-2.591270429	-7.029338394	-2.147890656	-6.982484036	-9.92248079	0.79835388	7.856430157
0.07292373	0.178671834	0.298568544	0.376239698	0.499485496	0.517138444	0.647599631	0.685002745	0.781032402	0.816595362	0.914393552	0.912424442	0.948066054	0.952658253	1.020740291	1.020601425	1.003866453	0.998594669	0.996059915	0.948268001	0.897808285	0.790998612	0.812505453	0.719558566	1.03190472	0.531078761	0.485088178	0.379160548	0.270369459	0.152888867	0.112059532	0.003238501	-0.106115547	-0.18686701	-0.287366647	-0.376823899	-0.5026966	-0.576651312	-0.617873509	-0.709508554	-0.737947023	-0.816266845	-0.878529965	-0.914108919	-0.948614688	-0.947128395	-1.006597472	-0.993180415	-0.979286388	-0.944783478
0.075160344	0.195894226	0.271087141	0.373641656	0.473357186	0.57947565	0.635589301	0.729866348	0.791523523	0.843289647	0.889825427	0.921785567	0.981342993	0.985281946	0.944971381	0.976280632	1.026283101	1.022599005	0.935377821	0.954703805	0.876949917	0.804434891	0.767211738	0.718972433	0.278141777	0.538725701	0.450178309	0.356594051	0.276249321	0.156211806	0.099793815	-0.024872788	-0.110676068	-0.176965667	-0.285364249	-0.353946486	-0.497649895	-0.559915644	-0.680111587	-0.699946158	-0.745239787	-0.822329243	-0.870144556	-0.904652006	-0.945948891	-1.010394465	-1.012107712	-1.00430116	-0.972454037	-0.962598123
0.043230573	0.267042723	0.478265799	0.65925205	0.75515042	0.695725478	0.482598763	0.458334947	0.685784509	0.851734632	1.038745378	1.023294642	0.949636152	0.875630678	0.89222019	0.918021017	0.902808204	0.891824019	0.969029214	0.99902343	0.993192658	0.859461396	0.655221812	0.435383376	0.489141241	0.666167355	0.753455098	0.690575844	0.485712902	0.246869193	0.064425126	-0.004578516	-0.082048494	-0.276695092	-0.4957515	-0.687657459	-0.724979529	-0.668423676	-0.51974667	-0.435466117	-0.632272024	-0.867939534	-1.0233248	-1.044462544	-0.929984131	-0.88385138	-0.866461044	-0.922286383	-0.90773128	-0.914057432
0.270020123	0.450025941	0.589730762	0.607553172	0.621750404	0.579202572	0.544893575	0.551423893	0.661784173	0.777542763	0.905479183	0.927656313	0.924948303	0.88861339	0.90347318	0.878542723	0.879677346	0.902359033	0.985447258	0.914266821	0.90212734	0.798983895	0.700645362	0.609270103	0.575963107	0.57574524	0.590799307	0.668340791	0.600173017	0.463263255	0.266944707	-0.010927489	-0.2741712	-0.46952439	-0.58247264	-0.661066013	-0.639180344	-0.59072769	-0.562541528	-0.563817065	-0.689178871	-0.774398823	-0.89007418	-0.917101957	-0.932111453	-0.916406901	-0.862921175	-0.839483744	-0.840608243	-0.889858116
0.099789484	0.247612496	0.487314388	0.680212836	0.714559328	0.688178238	0.469297137	0.456814045	0.636407404	0.863860826	1.00237666	1.037269722	0.961319843	0.883943257	0.905457362	0.862822969	0.878782911	0.904868606	0.941157585	0.996121821	1.017242094	0.854521518	0.63442498	0.423942742	0.516271293	0.683440732	0.788868274	0.689945782	0.483670615	0.277770195	0.07918119	-0.016049334	-0.040320797	-0.250974082	-0.487414548	-0.710383323	-0.744572721	-0.692368839	-0.495519712	-0.428319808	-0.641092305	-0.84810165	-0.990833296	-1.0032214	-0.945669384	-0.871712439	-0.86348049	-0.895703804	-0.897696481	-0.894370616
0.154242368	0.202554938	0.342244421	0.379499565	0.443017593	0.600386857	0.61353425	0.657860045	0.792792572	0.780970655	0.927021435	0.894334445	1.02852564	1.024771458	0.990180369	0.961977208	0.964679485	1.010612602	1.022833029	0.898298163	0.916034554	0.867915584	0.759321395	0.738133054	0.702110137	0.601594106	0.470519614	0.402389804	0.293974076	0.23407493	0.10604871	0.007985674	-0.114619099	-0.218256391	-0.362185953	-0.432609473	-0.501835369	-0.641901259	-0.638188685	-0.729576975	-0.859323825	-0.899020474	-0.946917011	-1.031236006	-1.044585663	-1.0607805	-1.065817135	-1.078826833	-1.090598695	-1.059999449
0.070695095	0.234422681	0.243535814	0.40902857	0.468428536	0.597820698	0.583892847	0.690334831	0.782900857	0.863814576	0.891972283	0.8932295	0.96231147	0.929614384	1.011585494	0.985301507	1.012442256	0.968580853	0.979819746	0.912920339	0.896340742	0.836442208	0.786655582	0.692690788	0.816459976	0.557242764	0.44659445	0.369521006	0.30626456	0.279993013	0.117157709	0.001954322	-0.122909388	-0.196552	-0.255933624	-0.367840653	-0.498678668	-0.56995734	-0.557995384	-0.723954081	-0.792485016	-0.794691091	-0.870819569	-0.961638592	-0.978267814	-1.003434976	-1.003606954	-1.007791012	-0.971511811	-1.019435663
0.080752543	0.190952147	0.259512672	0.39791034	0.467033794	0.520533878	0.605843393	0.704923651	0.73718134	0.827920988	0.889246586	0.958773352	0.986846012	0.929025048	1.005962952	1.030283147	1.022207268	1.010352616	0.983353335	0.934674387	0.895352031	0.836609413	0.77812105	0.718425661	0.615405768	0.601197089	0.537024892	0.395958356	0.300249276	0.196006295	0.089525687	0.021367954	-0.071319403	-0.163441996	-0.284792782	-0.381341681	-0.477326647	-0.546474594	-0.659186731	-0.714891189	-0.750852758	-0.837893913	-0.859483921	-0.898426467	-0.922204449	-0.913771468	-0.967099272	-0.981386459	-0.992221157	-0.967415172
0.077609201	0.244339642	0.296987482	0.414383391	0.477983704	0.536735299	0.656588434	0.714807325	0.780024556	0.822681705	0.900005882	0.975798111	0.956429303	1.031650355	1.019630566	1.076458766	0.973440134	1.03733481	1.028303781	0.979151238	0.893357336	0.881516003	0.809882132	0.742234413	0.615529723	0.562487995	0.392165908	0.3872339	0.33912547	0.217111686	0.095039699	0.019541063	-0.065358051	-0.25076368	-0.329262573	-0.377458037	-0.481907104	-0.597298602	-0.698455093	-0.723684211	-0.781590528	-0.901974396	-0.962853526	-1.016136233	-0.983901216	-1.059448775	-1.070598466	-1.064770346	-1.096157927	-1.096100998
0.097717005	0.201041476	0.339810916	0.368820687	0.490982655	0.553467438	0.648088348	0.676967237	0.766211635	0.839785767	0.898263084	0.923067199	0.952203904	0.970283926	1.011118948	0.987547746	1.039657481	0.958108795	0.928010982	0.904144926	0.86008687	0.856367697	0.783749378	0.688927479	0.607793408	0.555177628	0.459257097	0.390415873	0.278749723	0.229159189	0.102220193	-0.03044837	-0.116269476	-0.190816182	-0.289398236	-0.372693987	-0.463555921	-0.574147275	-0.615604277	-0.706913637	-0.788502277	-0.808400308	-0.880228508	-0.944103442	-0.925036289	-0.982429504	-1.003248072	-1.013868457	-0.985499856	-0.990223219
0.111787723	0.195715206	0.317515453	0.397763349	0.431447685	0.558272161	0.620276007	0.698480089	0.768732185	0.829694381	0.884263525	0.947900605	0.962031011	0.996529794	1.033784884	1.003809681	0.986419184	0.999145483	0.979424946	0.911033236	0.85572149	0.83092163	0.776145695	0.718339971	0.628762336	0.59342838	0.47134447	0.406025873	0.292818704	0.18146829	0.097121154	-0.003154848	-0.071709492	-0.197839142	-0.269090276	-0.370306711	-0.459265845	-0.540491073	-0.626056653	-0.702797678	-0.791592361	-0.842475396	-0.88535896	-0.942891635	-0.962803315	-0.980704913	-1.004585631	-0.999316985	-0.985637803	-0.96700192
0.102670924	0.196762603	0.266322664	0.408263611	0.470346406	0.540074394	0.633073341	0.707036454	0.739973669	0.844770305	0.873726125	0.905997924	0.94541295	0.989146607	0.980557155	0.997314062	0.983696882	0.969468042	0.97484281	0.941621323	0.892033388	0.838102189	0.743409889	0.729229021	0.613569491	0.561287253	0.495748432	0.358605021	0.270635891	0.191773379	0.090105381	0.018432271	-0.098424973	-0.196811116	-0.284382273	-0.383204791	-0.447762594	-0.543972669	-0.671570866	-0.671423694	-0.752295578	-0.834005834	-0.892552211	-0.917121383	-0.9579565	-0.990864732	-1.014137084	-1.000028212	-0.990642933	-0.972355099
0.047743852	0.258377424	0.502667452	0.672877783	0.755460386	0.666278362	0.500929243	0.481310523	0.666358629	0.888346056	1.046217696	1.017305479	0.959589974	0.911302566	0.903364808	0.94142474	0.892619516	0.916260305	0.992015638	1.042681264	1.043368272	0.872098246	0.665889683	0.458545535	0.517060344	0.683054272	0.730966808	0.677398931	0.500899612	0.25148564	0.092290227	-0.009948979	-0.104106183	-0.236661643	-0.519351545	-0.702855985	-0.76169802	-0.687558419	-0.538793546	-0.467598847	-0.645373413	-0.921836822	-1.017608699	-1.032211094	-0.988402099	-0.930193466	-0.912887371	-0.908945846	-0.899252189	-0.913702612
0.03652187	0.186342553	0.374324268	0.520970573	0.595839367	0.523045175	0.380198628	0.125396277	0.120358417	0.285986076	0.356735929	0.290409507	0.130284834	0.030365822	0.175757747	0.234421305	0.181913482	0.040323629	0.132514139	0.277965911	0.338891262	0.291009551	0.123910038	0.126956966	0.354467845	0.521759442	0.571203075	0.512641118	0.378625182	0.192863966	0.06227395	0.008490827	-0.059665502	-0.186755452	-0.366539897	-0.513708257	-0.562161254	-0.530872111	-0.350598327	-0.118436326	-0.115979958	-0.277607741	-0.358582724	-0.303666858	-0.139217223	-0.029917562	-0.183045453	-0.240563412	-0.202472382	-0.032984951
0.11350608	0.205951165	0.315187175	0.402825674	0.456403178	0.540694538	0.635101411	0.727265201	0.772212265	0.832682352	0.887681318	0.914886191	0.97253884	0.999150461	0.979713748	0.987748637	1.011744525	1.001658533	0.962123228	0.902522539	0.878667066	0.800874091	0.784512668	0.729235791	0.64248894	0.524079391	0.465267414	0.368634638	0.284854891	0.203513004	0.109580653	0.002661039	-0.055620439	-0.204282519	-0.288339933	-0.3724535	-0.446366602	-0.548147668	-0.615527852	-0.710932947	-0.791492594	-0.817519271	-0.873117489	-0.93517355	-0.965838252	-0.985789665	-0.995942459	-0.991799815	-0.991291021	-0.99099234
0.092528874	0.185400239	0.27213121	0.402868935	0.487860393	0.616219336	0.62246525	0.727521029	0.760681346	0.846435514	0.863960572	0.951258788	0.938096388	0.97838186	0.926917207	0.975292174	1.006573066	0.984078493	0.930341155	0.906447533	0.861338898	0.838777984	0.760649507	0.683105238	1.080683768	0.575602959	0.479382438	0.410490537	0.292862081	0.225874773	0.046957016	-0.00343704	-0.108022176	-0.198937622	-0.299253991	-0.403706535	-0.478861984	-0.521589591	-0.617432894	-0.703963986	-0.769141791	-0.851686475	-0.899871658	-0.904055672	-0.967485772	-1.006489	-0.982662188	-1.003864681	-0.950285821	-0.989278336
0.080109236	0.236739109	0.465111188	0.700053319	0.741089284	0.662589995	0.507853894	0.451678991	0.637653186	0.856674341	0.97746017	1.02539163	0.926446438	0.886007637	0.877902028	0.89596091	0.886788777	0.873679531	0.92399531	0.983019328	0.99862227	0.858947764	0.603112578	0.425653179	0.512104004	0.702964687	0.742230616	0.679328564	0.470353356	0.254734035	0.072444377	-0.02628527	-0.049150273	-0.245984422	-0.496948012	-0.657792811	-0.745653034	-0.661606768	-0.478550721	-0.444130479	-0.663897535	-0.850753191	-0.97748871	-1.003800384	-0.948304382	-0.87074773	-0.861040593	-0.874769516	-0.897893586	-0.885270542
-17.60806276	0.103899432	6.408788392	2.600224945	-5.035851937	-16.04966372	5.438741129	-7.237109448	0.814354265	-4.461168896	16.25511344	1.253596183	17.61957941	3.451897948	3.572416573	-2.530624746	3.507601171	-10.5255286	21.87346105	-1.6561907	5.327037286	4.92388392	-8.483308219	10.02529337	-3.905832962	2.976603583	-7.949167369	-11.09918433	12.20011946	11.01142555	2.910861379	-0.244648846	8.134576441	1.231277848	0.010835566	7.460902839	-8.818879219	10.89582453	-0.521463936	2.857241827	2.743462705	-0.427262171	-7.616207601	-0.773263011	-1.461296403	-9.540927311	2.183836382	-13.36242577	6.32074776	1.174219986
0.248313434	0.472331773	0.605655454	0.672131518	0.628336682	0.588877698	0.567708299	0.557904638	0.717665411	0.736629368	0.862022287	0.911475158	0.928111285	0.890693472	0.848111293	0.853064137	0.887491804	0.951176178	0.925713453	0.925268107	0.868549438	0.760768151	0.669736397	0.601347649	0.54089987	0.548469545	0.636677812	0.656266475	0.608626975	0.484368818	0.294815565	0.012354005	-0.299680122	-0.481795522	-0.62411239	-0.604264234	-0.650963245	-0.612287622	-0.594680935	-0.60426128	-0.690715583	-0.798764706	-0.896533515	-0.935481824	-0.928105336	-0.882319941	-0.862397997	-0.835298047	-0.855592639	-0.905999866
0.126955539	0.189238554	0.327029014	0.400034712	0.509681434	0.513987008	0.675607702	0.699536717	0.755453562	0.91194096	0.885930763	0.950833127	0.952984239	1.022675912	1.042136738	0.995042514	1.006087254	0.987809779	0.969283728	0.97364319	0.909248433	0.810835713	0.829645476	0.752028367	0.680498055	0.672831743	0.48812678	0.378201145	0.318587861	0.224042797	0.100898266	0.040882517	-0.048994929	-0.188529572	-0.307698037	-0.425492786	-0.476668568	-0.583695171	-0.692159938	-0.717889316	-0.792653682	-0.903958382	-0.910877498	-0.982866632	-1.005752206	-1.009535211	-1.043581577	-1.127642136	-1.119739452	-1.02422138
0.209868009	0.428963148	0.543026901	0.578584127	0.588109838	0.569384796	0.606725075	0.655054198	0.716228487	0.77687127	0.894153358	0.925899149	0.930182622	0.960683901	0.865403025	0.875308162	0.87764396	0.902435522	0.960415876	0.962969872	0.881138742	0.792949592	0.705701606	0.601936962	0.561526723	0.613456515	0.583769449	0.57875327	0.535075008	0.424260059	0.225700023	0.011696342	-0.208033264	-0.454606845	-0.56283108	-0.608935569	-0.550777339	-0.58114329	-0.622161744	-0.67443432	-0.692443138	-0.815954129	-0.932836071	-0.922216183	-0.915834638	-0.94652144	-0.906594281	-0.857807965	-0.910760275	-0.941476103
-5.40624568	-9.489577315	0.392135307	6.608677778	-3.994958099	0.448468193	8.860672806	1.977898631	1.623125805	-1.125205739	10.45574723	-3.240448086	-6.176209992	3.804063909	-2.517996102	-1.009652377	-9.930896225	-2.604632734	7.040579661	-7.778177371	-1.900714048	-5.336540907	11.34881616	3.080347061	-11.89069063	1.788823997	7.506933346	2.61443952	2.01754431	9.042167972	4.141983431	6.360185917	-8.36874845	-0.757100227	2.503507295	3.731579513	12.87521235	-8.477681685	-0.477113096	-0.695643542	-2.110277532	7.729673296	-7.576516095	1.104256425	6.354931078	1.640705127	1.744953012	-9.280649191	-4.83859488	7.422927226
0.109016309	0.155170872	0.295210244	0.388096026	0.464953053	0.565615396	0.632640948	0.721431411	0.801262812	0.823464478	0.876722353	0.88066034	0.958111405	0.971204266	0.996932429	1.013885623	0.970534368	0.960347996	0.977680885	0.918766652	0.913075872	0.84144749	0.800324995	0.73027381	0.519641903	0.557793338	0.443053973	0.37965	0.299884172	0.198093142	0.110645726	-0.008362372	-0.090350178	-0.178653644	-0.299179641	-0.389086941	-0.471853937	-0.533516819	-0.633668743	-0.721326727	-0.801220875	-0.83965655	-0.828587065	-0.912328471	-0.938727116	-0.995756283	-0.976307478	-1.013818924	-1.030139749	-1.022781145
0.092837089	0.234278829	0.265202704	0.393791957	0.491632527	0.591279312	0.613058832	0.719807191	0.762409503	0.874574141	0.917637666	0.946575559	0.953812684	0.963775426	1.07371094	1.053431658	0.984934952	1.008420006	1.042695782	1.00205178	0.963761569	0.836914467	0.810842621	0.723184742	0.627431788	0.555475584	0.544969296	0.397397936	0.323812038	0.237155523	0.083534839	-0.046799235	-0.134971305	-0.212323637	-0.284438402	-0.438312285	-0.463932793	-0.586916221	-0.722493002	-0.719802923	-0.83242608	-0.880686512	-0.977993344	-0.969100581	-0.982321927	-1.098410369	-1.06386372	-1.088461801	-1.120887419	-0.999330649
0.101459899	0.195476722	0.314584497	0.406561108	0.467270659	0.550906921	0.665948676	0.681997886	0.800028009	0.839356657	0.905736025	0.895114328	0.966977153	0.997324764	1.020066442	0.978331619	1.002158782	1.01105769	0.958374167	0.903769785	0.867409257	0.803961128	0.801181208	0.687274456	0.529345205	0.532141577	0.428537246	0.413432006	0.321088242	0.147019276	0.069772347	-0.037080712	-0.092673831	-0.215485507	-0.285402926	-0.404267525	-0.465280157	-0.567355318	-0.631141115	-0.675755894	-0.745621515	-0.848090198	-0.887672685	-0.93344134	-0.91606975	-1.000451868	-0.958351168	-0.967546284	-0.992318996	-1.001748806
0.035654525	0.055168469	0.158461164	0.250484449	0.32551315	0.404363966	0.452106198	0.507654886	0.530560222	0.537281021	0.64957893	0.716780323	0.816759793	0.900123745	0.971979961	0.971506646	0.954257504	0.937105577	0.79764082	0.687251987	0.620637618	0.579340906	0.550844668	0.490668359	0.442119634	0.41906989	0.323329627	0.252142593	0.161751635	0.10116499	0.042037994	0.011445669	-0.044454417	-0.068601424	-0.189253745	-0.24024302	-0.295663908	-0.382273195	-0.449056044	-0.477481597	-0.516471352	-0.591873639	-0.619865981	-0.74051758	-0.802113177	-0.890678088	-0.963035911	-0.956590067	-0.960868458	-0.883089724
0.030275494	0.059971692	0.196096298	0.24234566	0.329012891	0.39989921	0.473616495	0.514633267	0.526102574	0.625735926	0.658298499	0.769658363	0.869016868	0.910915884	0.980950212	0.981355452	1.003577226	0.945065827	0.793835301	0.750984583	0.677601914	0.600017531	0.521409185	0.476465314	0.422347498	0.355298673	0.300679687	0.2377072	0.151400327	0.049153859	-0.010877146	0.002913341	-0.025654493	-0.073582278	-0.148096297	-0.224762703	-0.314626396	-0.381262197	-0.426447864	-0.480745254	-0.546573623	-0.595657138	-0.672265864	-0.755429645	-0.806914594	-0.901931084	-0.966654328	-0.985571296	-0.961443132	-0.936908
0.090575722	0.267497484	0.494748279	0.656416712	0.750730603	0.681760899	0.517054447	0.458148106	0.669734397	0.868346837	0.994847982	1.034254013	0.947911959	0.93604587	0.885422167	0.904385992	0.915310395	0.887993357	0.952387028	1.046162671	1.038957142	0.870068644	0.697778245	0.451687701	0.515113009	0.672518091	0.762316656	0.714072691	0.481313516	0.30832252	0.074892633	0.013296266	-0.076305837	-0.278535182	-0.4909254	-0.669379595	-0.7695741	-0.695324464	-0.516291866	-0.427494259	-0.655260034	-0.896374783	-1.021582755	-1.011044154	-0.979363121	-0.902037226	-0.893308039	-0.935327903	-0.901354713	-0.941455421
0.042977554	0.264445532	0.481998917	0.68367569	0.761214784	0.672779171	0.53498417	0.47849856	0.637721082	0.884423653	1.015070362	1.033598805	0.973385844	0.902585178	0.905365606	0.910262164	0.897516777	0.897230119	0.978402568	1.049403436	1.025095589	0.880929561	0.663898612	0.469976995	0.523492143	0.672519291	0.755579753	0.667747016	0.498650479	0.267941643	0.07060472	0.006300429	-0.077420271	-0.246499715	-0.510913069	-0.658095406	-0.764159518	-0.699557499	-0.500407413	-0.437071668	-0.654494931	-0.869739217	-1.010736024	-1.030976484	-0.975468053	-0.909274272	-0.913535193	-0.942423746	-0.912931427	-0.896504224
0.096493855	0.240096294	0.272439742	0.38021413	0.489869364	0.567979895	0.589676022	0.701311873	0.796533338	0.82195949	0.924998108	0.905978297	0.979592499	0.980294086	1.028863385	1.005968341	0.998432478	0.975803789	0.971479775	0.935654841	0.901103785	0.839043943	0.762164694	0.726063614	0.640472765	0.502539316	0.417375755	0.389575168	0.300216235	0.220220199	0.120033858	-0.026058795	-0.056978299	-0.176021371	-0.2712151	-0.415797574	-0.441557881	-0.585555126	-0.714657055	-0.708046416	-0.759769979	-0.822568118	-0.853494243	-0.927314005	-0.965064027	-0.932746725	-0.969761604	-1.036533466	-0.950592554	-0.927564129
0.232411236	0.444501724	0.540124936	0.691216026	0.756866162	0.74610232	0.748526442	0.699082468	0.672747921	0.679960287	0.753309602	0.81498896	0.861482497	0.976697518	1.013879467	1.03497854	0.989810334	0.954335986	0.919910107	0.827575401	0.748992462	0.713142579	0.681450287	0.733064206	0.703761941	0.739003777	0.757692772	0.674930069	0.578580932	0.449912381	0.237814277	-0.031643245	-0.226787486	-0.405311902	-0.531871487	-0.639841585	-0.66240847	-0.730606394	-0.635682351	-0.601080314	-0.626836601	-0.655195231	-0.713497197	-0.763514261	-0.76424457	-0.830417642	-0.86670992	-0.876791653	-0.892742068	-0.806147234
0.110863454	0.218110364	0.301113996	0.380065125	0.437884423	0.545686428	0.677436004	0.683664077	0.807539892	0.823244451	0.916731949	0.931666449	0.945090838	1.007410915	0.962032861	1.044535828	0.998783241	0.987159654	0.958764435	0.964099408	0.882000919	0.860661254	0.810329279	0.690252563	0.592037764	0.583489827	0.501262183	0.402717121	0.334753568	0.148011048	0.092355287	-0.011275277	-0.081155637	-0.1803046	-0.332068062	-0.392491634	-0.452585927	-0.554819318	-0.623561102	-0.68238788	-0.784135454	-0.816570967	-0.871062598	-0.946426222	-0.947783205	-1.012038729	-0.95788542	-1.037300443	-1.01255788	-1.006842408
0.173928058	0.326595601	0.487270004	0.573792273	0.608656533	0.682400048	0.657455691	0.726111608	0.704343131	0.773980687	0.802634486	0.857468387	0.907464069	0.963841307	1.009065562	1.025036254	1.008826913	0.961504269	0.926389668	0.86402874	0.81966253	0.752140929	0.727850456	0.712913106	0.772470017	0.691657959	0.677588849	0.588911733	0.477464897	0.344976464	0.193127611	-0.009981709	-0.164265913	-0.371477319	-0.440981507	-0.548958127	-0.629129498	-0.648012524	-0.6493457	-0.681890349	-0.692787329	-0.685189595	-0.720737343	-0.791865565	-0.799204065	-0.883830963	-0.8749173	-0.880060289	-0.914734696	-0.887702675
0.155281531	0.19017532	0.316949473	0.322471723	0.461986709	0.565688848	0.617844844	0.728433477	0.775131438	0.837159618	0.937736261	0.9444094	0.906164848	1.064932526	1.035742377	1.044051527	0.989774794	0.98536249	1.013939145	0.949495786	0.948771381	0.83462717	0.800279475	0.719745628	0.64535899	0.543698921	0.491507082	0.389926936	0.298629657	0.209188585	0.083723018	0.081941631	-0.126283218	-0.182174507	-0.330468121	-0.442129085	-0.447394575	-0.600884454	-0.68429923	-0.677786968	-0.841185741	-0.915300803	-0.914643238	-0.919207071	-1.06415248	-1.038514775	-1.10585148	-1.067651639	-1.076002172	-1.058365504
0.064505519	0.199671963	0.323015616	0.434314161	0.461300172	0.596122934	0.640769966	0.727854645	0.753408108	0.806225563	0.87356815	0.941471494	0.932335123	0.983139808	1.030664329	1.048519649	0.958455309	0.993359396	0.932802968	0.897442101	0.903532813	0.869031769	0.744341875	0.702750737	0.641609695	0.542730081	0.495156193	0.391650902	0.274558233	0.190364582	0.1135073	0.004303109	-0.120121293	-0.196959386	-0.281121341	-0.339500213	-0.495049198	-0.558210752	-0.632651294	-0.705292081	-0.738997871	-0.797051652	-0.847758637	-0.909011009	-0.992495651	-0.986254	-1.016102231	-0.993389595	-0.959917174	-0.991881631
0.143349319	0.34545473	0.455554959	0.51298331	0.560188265	0.567029277	0.593005783	0.634502424	0.725036244	0.827974975	0.897379088	0.926469763	0.943119946	0.969170246	0.945781643	0.91438455	0.921506637	0.934921004	0.974618546	0.904448189	0.832330571	0.80642264	0.688655656	0.678238617	0.602116775	0.578837972	0.588695215	0.537219746	0.471744412	0.374304335	0.212286639	-0.000418782	-0.193228085	-0.38099592	-0.464645353	-0.550423117	-0.532739833	-0.555143743	-0.588043657	-0.653687878	-0.69355626	-0.830814051	-0.851604922	-0.93147205	-0.911322241	-0.946008741	-0.9263366	-0.898969035	-0.946019532	-0.977171854
0.091480345	0.198925664	0.279166479	0.437341325	0.465910682	0.574587333	0.655227442	0.711374246	0.709688531	0.850458877	0.865051346	0.955618898	0.96830952	1.006353456	0.987329877	1.015966478	0.993648466	0.985677885	0.94691987	0.94409728	0.913654407	0.85159264	0.776639717	0.713411462	0.624754846	0.556293223	0.474484965	0.425920226	0.250797823	0.170436568	0.085958504	-0.028341725	-0.08150511	-0.156642367	-0.266371434	-0.404021996	-0.468769172	-0.574562187	-0.657206888	-0.749721434	-0.782497222	-0.8564784	-0.89944844	-0.909901525	-0.974378663	-0.999909411	-1.021497687	-1.057209786	-1.030864703	-0.967240002
0.089375666	0.214204683	0.281284815	0.391378209	0.468716603	0.596647435	0.647340358	0.762135463	0.805471281	0.874597744	0.931673493	0.929605753	0.974643316	0.995650141	1.059678193	1.046805746	0.991236297	1.018739731	0.97516088	0.984947336	0.875785254	0.884113721	0.773983075	0.733425014	0.6679321	0.56017779	0.491422564	0.408524252	0.321851446	0.213560662	0.086463452	-0.016586101	-0.105545801	-0.215601108	-0.317605586	-0.38476341	-0.518034354	-0.611476061	-0.719603048	-0.738056126	-0.789662112	-0.92190618	-0.951959781	-1.015510165	-0.982032279	-1.036016151	-1.0425649	-1.091531854	-1.039335484	-1.070385572
0.058937064	0.234255832	0.30109454	0.348436072	0.457053674	0.641555266	0.630727465	0.71440136	0.770656278	0.74989531	0.985098255	0.98076237	0.950443747	0.967534429	1.016819653	1.053254669	1.013972503	0.992628987	0.98818651	0.953787258	0.932034958	0.862153965	0.799555922	0.711447331	0.656712955	0.606201736	0.510778366	0.399301243	0.314824111	0.196709993	0.079228276	-0.034736498	-0.127837784	-0.18699373	-0.342552705	-0.427442625	-0.522088303	-0.629459994	-0.632853769	-0.732222	-0.836365447	-0.890433333	-0.950688932	-0.983816161	-1.011570308	-1.068676155	-1.108465665	-1.065004409	-1.042735258	-1.043068019
7.880232812	4.616036191	-16.56224813	-5.031723091	-10.23410734	11.18372123	-5.884310576	-2.608000102	-0.254002277	11.58079333	9.296187028	1.599184328	4.944201743	11.90000511	-1.978757746	2.006190276	-3.25081776	-3.47628506	-0.730868865	2.888280069	7.184766568	3.802091409	-0.235172933	-1.690956369	1.273717045	-0.069492937	-12.83388746	-1.520127373	8.041284511	1.459559456	2.493363004	-8.851721494	-8.853655444	-2.40342179	-6.483418461	-6.063026804	-4.159626155	3.485882454	-8.293346787	-9.825439329	5.816998696	-15.16757419	-0.057952506	2.630266405	-1.156510993	-0.694236802	1.003814734	-9.884043217	-5.288069041	-3.184880695
0.112043915	0.211955767	0.269952346	0.391986671	0.490835892	0.56687644	0.63195532	0.711116912	0.76020734	0.847389256	0.896227027	0.930518862	0.969442835	1.031320464	1.025071364	1.055793125	1.031753687	1.033982655	0.975417367	0.939580086	0.898850281	0.875022027	0.802557322	0.756145441	0.700420779	0.578648883	0.472897499	0.406739107	0.314959807	0.211744498	0.120363007	0.02545832	-0.092631172	-0.189420517	-0.313545999	-0.416285725	-0.498558317	-0.576890953	-0.652761645	-0.759799031	-0.827096725	-0.916633758	-0.960007546	-0.956588247	-0.994755222	-1.062690454	-1.082978813	-1.0873031	-1.09177082	-1.060361699
0.087034727	0.148750733	0.322184673	0.389288884	0.470786056	0.539335157	0.651924311	0.730939655	0.758970079	0.851606723	0.885338811	0.954030206	0.97934673	1.032612275	0.989829668	1.003275556	1.045697185	1.009552777	1.015074333	0.951009641	0.920655869	0.865502233	0.761951005	0.747080609	0.675195834	0.579308163	0.482277716	0.386586469	0.291822086	0.186401262	0.106487968	0.00735882	-0.091749807	-0.188206729	-0.30341314	-0.425468346	-0.51646145	-0.588339091	-0.677581296	-0.700922464	-0.809824553	-0.877273852	-0.968929465	-0.983038161	-1.046629178	-1.08060024	-1.102951271	-1.058910179	-1.070823516	-1.048743635
0.08695945	0.253894055	0.461262603	0.673221063	0.753248374	0.664330929	0.511606116	0.445359549	0.639475589	0.835357809	1.002340074	0.986795681	0.949257204	0.859475864	0.866207735	0.899371385	0.906634672	0.894727443	0.941284027	1.021428979	1.004063323	0.842446816	0.66039044	0.426711255	0.482356897	0.648759223	0.738836722	0.676447835	0.493787199	0.242630453	0.041834549	0.014440987	-0.056641309	-0.272525712	-0.478706237	-0.661700726	-0.758236477	-0.680097446	-0.488218723	-0.450306635	-0.648676823	-0.833446498	-0.967786778	-0.994666985	-0.95670105	-0.853601738	-0.904858278	-0.875049303	-0.872616088	-0.881583664
0.120890291	0.217685306	0.281478689	0.368306764	0.487607138	0.56176183	0.626128615	0.684428748	0.746136693	0.838051841	0.875784064	0.920498046	0.937294309	0.976292177	0.983340309	1.020603913	1.03678888	0.991934507	0.965650216	0.918599721	0.868425222	0.832177836	0.795757632	0.716763554	0.197346699	0.518185025	0.493224765	0.41614275	0.27288401	0.195528819	0.093187104	-0.036594709	-0.066190743	-0.175522603	-0.295733068	-0.369068944	-0.439950482	-0.585399055	-0.633150513	-0.712962875	-0.79473634	-0.849244575	-0.855728893	-0.902843911	-0.942624751	-0.990241334	-0.997985468	-1.012356676	-0.97158551	-0.952994673
0.054451113	0.159748771	0.330415619	0.470050846	0.575451194	0.559235051	0.465535783	0.318081559	0.191472179	0.097986515	0.080969183	0.188107105	0.326366057	0.486911062	0.621092333	0.64033127	0.600391332	0.477910575	0.322072303	0.165242099	0.071447031	0.106361937	0.20111522	0.337248823	0.466924048	0.54626286	0.545786119	0.465931647	0.321604584	0.157755002	0.04522371	-0.004184277	-0.028508896	-0.170945145	-0.313817424	-0.470229891	-0.563073083	-0.559025956	-0.479544981	-0.324518004	-0.191335044	-0.098223668	-0.081749682	-0.164964416	-0.321941905	-0.474143829	-0.580248084	-0.65068312	-0.608313949	-0.490028379
0.080003572	0.183113153	0.294785356	0.356945709	0.470888845	0.557056614	0.645691619	0.715011705	0.800059779	0.805852253	0.874897469	0.952456017	0.921080103	1.048397132	0.961321872	0.989432273	1.017598316	1.000927747	0.976757144	0.91101582	0.90478429	0.862858532	0.787732361	0.694938925	0.366906299	0.546590879	0.477843837	0.368705	0.277771073	0.182841565	0.059578026	-0.024085532	-0.115066938	-0.206001583	-0.280024904	-0.389445528	-0.512753388	-0.523793196	-0.623648583	-0.665897959	-0.767994233	-0.842029005	-0.901492155	-0.925994677	-0.948688112	-0.960613081	-1.011446912	-1.022424403	-0.999138256	-0.967164724
0.118588455	0.191718664	0.291036222	0.364616389	0.491973755	0.55184029	0.676602858	0.740987401	0.760444146	0.776461977	0.907180347	0.937023245	0.982744341	0.98240437	1.014206509	1.028613191	1.012734559	0.998493697	0.950311671	0.969948636	0.909071251	0.863468592	0.8108805	0.686680753	0.688970543	0.587426671	0.494597111	0.401300733	0.337460665	0.223600936	0.061403306	-0.027685638	-0.090978013	-0.169132941	-0.303782968	-0.431975546	-0.518092537	-0.592082133	-0.682084325	-0.736569869	-0.819335555	-0.926485971	-0.972187531	-0.94278821	-1.034229133	-1.078183669	-1.050389139	-1.087466888	-1.022683667	-1.085661721
0.045508663	0.223424858	0.313439887	0.375495363	0.52489282	0.555641515	0.631269373	0.679931726	0.795597934	0.876146674	0.912641159	0.922985523	0.976577868	1.03256589	1.025063375	1.037889484	1.03930137	1.023245073	1.009036712	0.96561776	0.905776443	0.888669816	0.825245175	0.763285035	0.714074746	0.589907234	0.510015314	0.416278213	0.273483384	0.192377639	0.124356428	0.018175833	-0.111098015	-0.195088323	-0.312433306	-0.37012058	-0.4930524	-0.594779857	-0.686538288	-0.770628579	-0.855027222	-0.905188242	-0.952039978	-1.027857607	-1.037607782	-1.103903648	-1.075773881	-1.126617402	-1.095504183	-1.060953546
0.051446373	0.181243802	0.32301377	0.408815895	0.453483571	0.548896933	0.659246452	0.690703401	0.816998058	0.940422844	0.900159346	0.910320885	1.008046183	0.983848672	1.001925868	1.006732068	1.036519163	1.013109438	0.992288998	0.945803991	0.954132425	0.886689179	0.817370222	0.726941997	0.656276825	0.584004433	0.519060571	0.392114232	0.253621307	0.245156704	0.080205155	-0.009237255	-0.105899185	-0.23234694	-0.298700015	-0.370534397	-0.509057739	-0.557867121	-0.659696383	-0.768676832	-0.848998884	-0.880245781	-0.962330808	-0.960943659	-1.011254953	-1.083028389	-1.078299288	-1.055612306	-1.087951699	-1.069091924
1.318131618	2.05383713	-1.356910263	2.981615277	1.123419459	1.330999741	2.639171548	-0.713289894	1.665444906	-0.080206814	0.458283866	-0.767868352	0.656072253	2.212428631	1.053331334	0.411073346	-0.833483368	2.640005403	-0.64257792	0.859348601	0.4891631	3.858100912	3.340460753	-1.699075032	0.773299892	-1.594251145	-0.053217177	0.684878567	0.829621097	2.500059871	-1.379176477	-1.501393267	-1.628876553	1.201896291	-2.139612854	0.310805695	-0.333468412	3.41912774	-0.114507586	-1.720178804	-2.861612827	-0.967870809	-0.417684897	0.509918712	-0.607707998	2.954111417	-2.32697583	-1.971241133	-1.371664831	2.507919564
0.193274155	0.354962679	0.499146959	0.559266781	0.632398887	0.677090708	0.713104998	0.733341316	0.71061232	0.762370227	0.796956081	0.878002177	0.926771366	0.974805123	0.994660583	1.034128994	1.032395955	0.950205543	0.931981015	0.842840022	0.795648812	0.770341969	0.756559432	0.726280271	0.723422373	0.666275635	0.649093845	0.577058132	0.455981466	0.342735087	0.193344532	-0.026393054	-0.128704554	-0.304296344	-0.434867325	-0.555569845	-0.629421999	-0.616500459	-0.638829798	-0.691812789	-0.728331759	-0.717335211	-0.741213982	-0.782075185	-0.825835809	-0.863741281	-0.887990163	-0.898817075	-0.955270319	-0.911040255
0.117478256	0.214111341	0.303620116	0.407424913	0.503535263	0.594455569	0.632107104	0.691694683	0.74446149	0.872313428	0.903130354	0.935890898	0.979909905	0.99856928	0.969096364	1.024470172	0.952870886	0.974699453	0.935984	0.98051265	0.914894769	0.853831433	0.768120824	0.767704178	0.646334758	0.547696212	0.449063442	0.412146972	0.348472537	0.164235311	0.08439499	0.001353072	-0.089255988	-0.163292636	-0.303732726	-0.359136385	-0.452909115	-0.563459144	-0.636235096	-0.703410897	-0.754363083	-0.821375507	-0.911659406	-0.915255891	-0.978500354	-0.990923607	-1.003263868	-1.026542187	-1.008175943	-0.992334282
0.056867214	0.204633636	0.445242319	0.637041741	0.675367875	0.585495595	0.460510371	0.361098428	0.54246158	0.751146905	0.89041257	0.863043216	0.762579911	0.717384823	0.674802539	0.701180119	0.73854497	0.714062901	0.787997617	0.866921078	0.87559333	0.729240197	0.520914636	0.322911115	0.445092453	0.59251933	0.697070054	0.630789832	0.471199399	0.207331445	0.05857401	-0.023082801	-0.065844291	-0.182303902	-0.46677389	-0.618303527	-0.692517424	-0.626803526	-0.445831949	-0.351176426	-0.53542175	-0.768151053	-0.849025155	-0.856751173	-0.765383777	-0.711157564	-0.695314339	-0.70238235	-0.703433186	-0.738296989
0.035900117	0.169791272	0.290493305	0.402359328	0.515462243	0.535165748	0.484205537	0.412403187	0.320646003	0.315124922	0.310479133	0.380196372	0.527151858	0.648122599	0.781813632	0.800579255	0.778881943	0.659393995	0.520774702	0.410246428	0.28921823	0.275658955	0.312427122	0.375746935	0.480685738	0.526690167	0.51783432	0.392894675	0.293924891	0.119531886	0.039959664	-0.006229939	-0.032434927	-0.154127512	-0.259768221	-0.421407729	-0.481034985	-0.538518931	-0.479682609	-0.405078486	-0.333392719	-0.28640786	-0.324455409	-0.389854159	-0.532993147	-0.658299184	-0.759295028	-0.820763406	-0.760153959	-0.661895219
4.881498968	-1.349692982	8.26311114	7.155218552	0.20774705	-0.952318892	3.892636325	-4.87476758	-0.358718587	0.339242093	1.569317797	5.366937558	0.194783779	3.956387366	-7.14162755	-1.790367586	3.901374373	-2.191221698	5.243213541	5.355162784	7.790796953	5.556787861	3.79700239	-3.029200181	9.84604967	-2.098344738	2.76370916	4.767266941	-2.310167963	-0.535583729	2.928786969	-7.699831284	-1.454454661	-0.700114927	-1.096050192	0.579327886	-0.775292557	-0.298342306	2.69671765	2.122136792	-1.78926413	-2.379762449	5.219043198	0.955628043	1.018907593	-2.903707502	-2.145313161	-2.245204654	5.20323294	-5.033019755
0.024592102	0.041845379	0.146947639	0.259389747	0.317142381	0.402992099	0.444472164	0.482412557	0.505795808	0.582535409	0.658709625	0.730234285	0.815337203	0.870755527	0.938866422	0.97031546	0.97539498	0.921543117	0.826740283	0.716685264	0.641897352	0.584393243	0.499713684	0.462783245	0.42455506	0.42637944	0.33428554	0.255403203	0.12667206	0.07825135	0.031651026	-0.010475306	-0.002475313	-0.077043309	-0.176037712	-0.287130548	-0.350023648	-0.39012561	-0.446518996	-0.4784227	-0.561339714	-0.563454037	-0.627013008	-0.732608661	-0.816900523	-0.900064893	-0.97083038	-0.986288761	-0.947401828	-0.939008143
0.069450569	0.199361604	0.308217439	0.377233936	0.485876679	0.548481201	0.599040438	0.685523213	0.757473452	0.852712023	0.857637417	0.90969171	0.963087984	0.981898194	0.999709367	0.987048935	1.014522241	0.927922661	0.957522663	0.955998012	0.897850707	0.824846107	0.766973894	0.683492568	0.282247551	0.552495323	0.489927151	0.367395015	0.311412404	0.18798847	0.088029491	-0.011349473	-0.118793856	-0.160826503	-0.280607843	-0.40113262	-0.471767675	-0.552998443	-0.586172552	-0.718588841	-0.783621088	-0.821554353	-0.8378973	-0.921686915	-0.954612954	-0.995923107	-1.016301244	-0.985174112	-0.977632946	-1.004731477
0.082701647	0.190511915	0.287285728	0.378762967	0.478061897	0.550596056	0.633327087	0.712403171	0.787389368	0.86976219	0.881973387	0.947548625	0.983811488	1.057129865	1.07631538	1.023277735	1.033581221	1.000957046	1.016209803	0.961841806	0.897286033	0.868458315	0.821571376	0.730755565	0.706703628	0.600100995	0.482113375	0.40779841	0.300689927	0.196991221	0.073726294	0.039432545	-0.113957566	-0.206856513	-0.275913879	-0.38186314	-0.487055552	-0.608489571	-0.67397861	-0.762735294	-0.84124748	-0.898611646	-0.971730704	-1.016976006	-1.047428397	-1.087325063	-1.078192345	-1.08327916	-1.088816971	-1.042699472
0.182498654	0.360304355	0.462932178	0.557168816	0.655246788	0.693537315	0.694585045	0.70942467	0.734671699	0.701712252	0.806351139	0.863891714	0.870546663	0.987258712	1.00299188	1.038520221	0.987628509	0.964617492	0.932420991	0.856363726	0.776586819	0.735829235	0.725102947	0.736462184	0.673843388	0.680637912	0.653246576	0.592005667	0.479722469	0.300414463	0.206196293	0.011266412	-0.180779977	-0.36436699	-0.462234752	-0.571176674	-0.658987332	-0.631546268	-0.683312047	-0.687601007	-0.673358411	-0.68646778	-0.717797376	-0.765239478	-0.835918698	-0.874510627	-0.918268475	-0.913668439	-0.876664213	-0.867365086
0.15818221	0.374022901	0.461130511	0.526784849	0.549394843	0.576615454	0.573839202	0.632311574	0.757743516	0.780108685	0.880920566	0.932044102	0.937666042	0.964125069	0.902186778	0.942232596	0.980399299	0.948763578	0.94855606	0.930682193	0.847927563	0.786080133	0.736703954	0.63676202	0.592675751	0.558653167	0.553707852	0.528741628	0.452146895	0.357348205	0.199739336	-0.025355728	-0.195656617	-0.334950522	-0.445659903	-0.540038665	-0.576570313	-0.56862031	-0.595244088	-0.650090384	-0.737205002	-0.803854119	-0.919542509	-0.893781094	-0.96224184	-0.922815687	-0.934291996	-0.914389577	-0.914358174	-0.956319904
0.266497625	0.472578441	0.618975269	0.687140896	0.641029193	0.620555377	0.574226092	0.587025387	0.704967258	0.784818948	0.876995071	0.936098186	0.909081489	0.85845326	0.853661729	0.864100541	0.868263698	0.901119553	0.915154505	0.939016258	0.883999499	0.748156476	0.713085307	0.605944756	0.57470678	0.541585267	0.609138398	0.665459768	0.617878865	0.458200203	0.302611003	0.017724086	-0.302469271	-0.483345416	-0.608653939	-0.658796321	-0.672298777	-0.571581412	-0.575029027	-0.624917162	-0.675609386	-0.781851854	-0.874388348	-0.946696636	-0.946968082	-0.893330231	-0.87575512	-0.87068771	-0.868815822	-0.87404477
0.149374764	0.213766123	0.330267032	0.43437148	0.50512988	0.570111616	0.672412642	0.731465898	0.71266464	0.83082446	0.880073579	0.999706663	0.978127081	0.984262611	1.012233347	0.990796879	1.029153725	0.996368763	0.936307398	0.931106458	0.879867696	0.819451813	0.770665191	0.744101595	0.634627251	0.598777858	0.453772919	0.419965354	0.289422373	0.191291735	0.113529312	0.025276028	-0.088367455	-0.159375274	-0.302652699	-0.42952683	-0.470299033	-0.499352883	-0.627576609	-0.682949054	-0.753326017	-0.839949949	-0.874124264	-0.886946618	-0.980739821	-1.01287073	-1.008261133	-0.970931573	-0.991377031	-0.920702527
0.048995997	0.147404507	0.300797542	0.409254311	0.505384642	0.52741415	0.511126721	0.409438992	0.293808893	0.250692115	0.270027832	0.354644439	0.491567608	0.634867165	0.741805657	0.77769108	0.753848741	0.643198027	0.51400524	0.36519974	0.27237147	0.241625518	0.304673537	0.368726688	0.466221966	0.525433793	0.512360503	0.420585149	0.28909354	0.149561345	0.02741865	0.012341364	-0.042372994	-0.147112466	-0.296095317	-0.408361523	-0.528113183	-0.523364981	-0.499267641	-0.389672698	-0.312600479	-0.266003728	-0.272839948	-0.357077652	-0.49703619	-0.626463817	-0.725405658	-0.804893064	-0.765334153	-0.654164118
0.280974697	0.46445253	0.63731343	0.626161187	0.625290461	0.62070733	0.507155902	0.559808143	0.659710019	0.780998775	0.868065459	0.9316012	0.920888764	0.912548693	0.887395275	0.845514523	0.884846595	0.904653759	0.933011339	0.920101633	0.88381685	0.78563417	0.706477006	0.632778076	0.556245887	0.577425933	0.628627348	0.658020239	0.602524429	0.488295806	0.257517571	0.014916591	-0.262524629	-0.461405473	-0.627289013	-0.605547291	-0.697354166	-0.562247691	-0.571307063	-0.615195143	-0.672328106	-0.780444941	-0.864680811	-0.959915525	-0.947144741	-0.907372905	-0.880354622	-0.856754171	-0.862111942	-0.890986667
0.094131409	0.177991923	0.251902481	0.410308328	0.417635768	0.596843246	0.623264264	0.715972824	0.808307765	0.870533708	0.920724215	0.939401082	0.967182031	0.968549931	0.985846558	0.969045325	0.984566926	0.956800496	0.932992065	0.912593715	0.923533479	0.853214797	0.785040318	0.676751375	0.623753121	0.562166431	0.478315015	0.39631742	0.275514878	0.214532711	0.109595494	0.025047284	-0.086340174	-0.226717868	-0.294439003	-0.383221513	-0.474724767	-0.54751803	-0.62714331	-0.759434786	-0.723752405	-0.810855034	-0.874921206	-0.896387113	-0.945566037	-1.011160631	-0.988470343	-1.021504842	-0.997834435	-0.997879959
0.092097519	0.206950667	0.270552577	0.400751102	0.463494401	0.607323469	0.642152641	0.74680897	0.797050088	0.819512588	0.904302837	0.927619768	0.945137066	0.989699776	1.027203559	1.014403277	0.981426497	1.034225829	0.978347515	0.95392588	0.918206981	0.856384836	0.808659237	0.733950404	0.680233049	0.555325806	0.467514622	0.408197965	0.305139179	0.213564678	0.093426517	-0.013959941	-0.084009112	-0.20664646	-0.325456398	-0.406880133	-0.456712604	-0.58314764	-0.68612732	-0.768411134	-0.841013692	-0.89123811	-0.947280511	-0.989343499	-1.0615698	-1.07069329	-1.0502642	-1.060271213	-1.083140894	-1.004642156
0.164535301	0.380874057	0.53651531	0.658222415	0.686475432	0.696645801	0.71964369	0.692079123	0.721293744	0.681354489	0.750988645	0.842244555	0.891525016	0.953950714	0.999488105	1.007741289	0.981621634	0.966662842	0.890701933	0.801555566	0.771227777	0.718819463	0.690078064	0.719920674	0.734174237	0.755337839	0.707045311	0.653227332	0.533706575	0.427493047	0.217708831	-0.014177859	-0.200536669	-0.3472115	-0.514003855	-0.619625779	-0.630467179	-0.724958563	-0.634335239	-0.699391772	-0.624065611	-0.652922703	-0.703506735	-0.762114813	-0.84224695	-0.849616336	-0.88128756	-0.876894954	-0.859335719	-0.835882886
0.534482194	0.578073087	-2.856652185	3.267535046	0.036415466	2.955344626	3.915449316	4.915021645	-0.619336293	10.82634891	-1.862800912	0.011123234	2.762443444	4.115742109	1.366416979	2.395503076	2.293728555	3.796470422	2.690462831	-1.647778684	1.044232123	-0.095413555	-3.139116999	2.244582067	0.781733351	3.000778325	0.819524605	-0.477908907	1.59070808	-0.454180099	3.095011884	0.363621727	2.410348972	-0.450224848	1.186174505	3.973261314	1.282269757	0.222454228	3.691654077	1.019060937	2.145961292	2.005903363	-4.064596541	0.298314985	0.5002888	-2.67340887	-2.659711809	-2.039974877	0.727861586	-3.810933849
0.094692846	0.171358787	0.305247409	0.371106018	0.467948028	0.568607186	0.645148788	0.708480503	0.758861901	0.835646426	0.913870332	0.928389173	0.947295342	0.981658838	1.012943484	0.998084624	0.994278714	1.001782313	0.96786262	0.911579574	0.862232606	0.795482786	0.775811124	0.72900122	0.642351598	0.596627039	0.473345924	0.379434761	0.295068947	0.19932968	0.088608194	0.020965907	-0.08418574	-0.175625916	-0.256837345	-0.352692908	-0.441656111	-0.569814275	-0.627977348	-0.718375373	-0.780418036	-0.8217189	-0.887279073	-0.943609505	-0.990037897	-0.978008902	-0.990458486	-0.988235633	-0.986678029	-0.980405128
0.260563321	0.387088505	0.516572046	0.612727417	0.618081596	0.58160333	0.61117929	0.62487141	0.692113819	0.800358597	0.917362812	0.911936968	0.931004921	0.91679655	0.868399621	0.850134239	0.909876441	0.914313963	0.976703361	0.89256005	0.886955585	0.758460755	0.683100542	0.64021035	0.585288482	0.563830448	0.616681517	0.600372223	0.578448155	0.411556363	0.263389016	0.027339477	-0.285196067	-0.423897434	-0.555912617	-0.646158843	-0.590507633	-0.595548732	-0.615615076	-0.648512979	-0.701076838	-0.765975152	-0.876399209	-0.958323897	-0.934775041	-0.906588452	-0.899327275	-0.829125431	-0.886213929	-0.919078965
0.117051828	0.182498108	0.268369933	0.392792239	0.454092067	0.548550899	0.609497916	0.700510949	0.74049274	0.827139736	0.862914515	0.939498649	0.92092612	0.998445589	1.001870291	1.003976877	1.016386913	1.010435641	0.910979796	0.900215861	0.885380372	0.824033605	0.781103252	0.706021	0.672444182	0.546298807	0.478146343	0.393645243	0.328405017	0.213003429	0.093502384	0.050832507	-0.123264567	-0.177460882	-0.291784588	-0.410909747	-0.470077107	-0.558612407	-0.624015265	-0.664332928	-0.772662401	-0.854878623	-0.909188331	-0.946868404	-0.923308925	-0.982828631	-0.983923603	-0.998959441	-1.018969394	-0.984431502
0.030388129	0.169274586	0.300760689	0.423144038	0.510070505	0.523141143	0.485657181	0.369586405	0.302046579	0.192462221	0.207350138	0.31368481	0.441926978	0.605676103	0.714282402	0.748493739	0.69939266	0.597627	0.478794083	0.318237606	0.245144275	0.215437475	0.256923707	0.377531622	0.502821998	0.535515886	0.516461848	0.422855336	0.300122446	0.152455796	0.041038245	0.01018733	-0.025671443	-0.15361089	-0.310954597	-0.458244309	-0.519320407	-0.521997751	-0.488814059	-0.356080962	-0.251143653	-0.217511736	-0.234675945	-0.322228049	-0.45440678	-0.606076643	-0.73113589	-0.749517176	-0.688986159	-0.609069175
0.172976706	0.367420199	0.495862916	0.617539155	0.651698043	0.711731798	0.715364781	0.704257358	0.771157913	0.771095993	0.746352807	0.849094447	0.879390414	0.938725747	1.008057826	1.034768544	1.020496314	0.951489345	0.89662265	0.833022026	0.802142832	0.741676703	0.731623587	0.7128679	0.703248937	0.702398015	0.649260397	0.60432755	0.515698566	0.388923771	0.194596465	0.024559725	-0.186677727	-0.381519005	-0.462273426	-0.601639577	-0.588801403	-0.666152935	-0.664609038	-0.657959068	-0.704474611	-0.709509243	-0.693953609	-0.786800253	-0.806989161	-0.830667905	-0.882607198	-0.880944544	-0.908052333	-0.896350691
0.059179782	0.275009537	0.515160086	0.703508902	0.771277981	0.723891761	0.507295331	0.471465019	0.697029332	0.906312114	1.077222829	1.082369682	1.008588003	0.949300378	0.944595106	0.950673768	0.986973983	0.9434168	0.996654899	1.031077614	1.038513514	0.911192352	0.676260065	0.448605379	0.544371344	0.709544694	0.781485892	0.721694955	0.514645447	0.277143229	0.074244912	0.006189377	-0.061978711	-0.240234849	-0.508587835	-0.641047498	-0.769381255	-0.725988919	-0.51720596	-0.456488883	-0.683783078	-0.915639556	-1.02222299	-1.092642938	-0.980300753	-0.952268247	-0.933674354	-0.938550638	-0.942277016	-0.925228595
0.108468959	0.145773592	0.239139805	0.307806835	0.440160611	0.539282222	0.686898107	0.762335519	0.801797061	0.831107959	0.92715451	0.96019767	0.960041944	0.947817723	1.009826253	1.023454193	1.069967446	1.062360171	0.99236922	0.951616118	0.920780112	0.886634243	0.815134687	0.715258092	0.741898455	0.597312717	0.492409754	0.382478768	0.273628799	0.1617352	0.084461774	0.043520382	-0.013892067	-0.181301752	-0.289210052	-0.472354615	-0.530471835	-0.598900442	-0.65977873	-0.710145419	-0.776617624	-0.874161192	-0.93722513	-1.037926794	-1.039008718	-1.047044625	-1.102496684	-1.126253514	-1.095422888	-1.064134802
0.088213866	0.207671718	0.303058374	0.381865943	0.443181461	0.562985655	0.643463797	0.699254723	0.769426576	0.821967924	0.877363853	0.949953025	0.985256027	0.977529182	0.97495966	0.97610083	0.979165298	0.992396692	0.945440124	0.949991545	0.847728082	0.817441839	0.78647273	0.711252982	0.633647059	0.554381643	0.472137712	0.411994668	0.304640691	0.215253232	0.090295259	-0.010189382	-0.099469647	-0.192314802	-0.272780022	-0.396631391	-0.494071547	-0.565052171	-0.646270926	-0.730479955	-0.752455769	-0.844166947	-0.876146849	-0.925592761	-0.966291437	-0.97089358	-1.011789352	-1.006347858	-1.003807488	-0.978210121
-11.33715057	-1.526942854	5.211366384	-11.82991535	-2.084994351	1.338681325	15.00643146	14.48213439	15.61643604	7.467450057	5.949184097	1.805966195	4.107617377	-3.267380082	-6.678400324	5.271617177	-4.798403545	-3.534294922	-5.522743743	11.40725253	5.577394102	-2.340437332	-0.259099044	7.190930509	-14.12732049	9.168087053	16.67374165	0.269227224	-0.598906637	-16.82137008	-3.487114188	8.141507364	13.20074583	-11.92340815	8.450370895	3.022968857	0.879432532	-9.656189691	6.744157078	11.27928627	-1.455074075	-4.577615151	10.40095371	6.173013848	9.286009181	8.729880103	-5.292972979	5.402191409	-0.156162236	-5.433286679
10.38939327	19.44420011	-27.28922493	21.78722349	-29.58503691	3.248835298	8.090830237	-2.798014187	1.273334283	27.5896584	1.593019995	-14.51770642	-11.03616841	-5.823800003	16.7512331	24.85304934	7.614611833	-9.468699365	-36.69724371	-23.99391243	4.632963989	-6.918121174	23.44339749	-8.02778373	39.85276888	14.92620745	-17.32597017	-4.49467479	8.082550444	-9.008806193	-9.082003698	4.692875646	6.55225594	-11.92264599	0.766826737	-6.549906567	-25.75545751	-11.49254473	33.2437286	23.23977123	1.14125501	10.60507001	3.961630547	9.91958893	-12.71731695	-0.137344567	-41.3133316	-27.87164309	-11.98129488	-9.701801237
-5.677786514	5.178047156	1.143388958	2.788568853	-1.051590476	-4.848391649	-0.905323634	-2.93840124	2.623281738	15.3261563	-4.76124049	-1.706980013	2.293454887	0.701251533	6.944673195	1.656042444	4.129383635	5.177482833	1.622650283	-1.256090279	-1.523534044	0.101248837	8.084607911	10.19488887	0.193761982	-7.638501987	4.676400153	2.893812679	0.115160173	-1.006695397	3.273157622	0.135545157	-4.053289039	3.854335606	-0.779914544	-3.823880925	-13.87136991	-12.45575405	-1.96810865	8.417232954	1.821746592	6.040077413	-3.307259763	1.49651509	-2.404186327	-1.130517508	1.294726579	-2.943633425	-5.102692066	-3.73299118
0.108672259	0.181882604	0.265045508	0.378096778	0.466001882	0.612950285	0.662570949	0.658913129	0.758186386	0.824893124	0.875893546	0.896865829	0.944863317	1.060992318	1.030353252	0.998617886	0.979164234	1.022346734	0.96521491	0.942161766	0.887645618	0.818493304	0.747158916	0.751404511	0.592488398	0.571514911	0.512493149	0.380292506	0.356775944	0.230507093	0.071498397	0.00944126	-0.043907068	-0.19219201	-0.269144124	-0.380353442	-0.491584426	-0.566185875	-0.677524732	-0.679056688	-0.787579626	-0.920187074	-0.889979527	-0.975735292	-0.962342871	-1.029821075	-0.986035238	-1.005535835	-0.985016651	-0.981567176
0.082046271	0.199541067	0.304615974	0.360997117	0.483083446	0.553931916	0.623670388	0.708479003	0.798251439	0.848918554	0.88232228	0.924878669	0.956721104	1.010670831	0.994725457	1.04721973	1.029154309	1.050228967	0.966344677	0.997883937	0.916316904	0.876142083	0.82849755	0.741430678	0.671177098	0.559225092	0.511859478	0.411303761	0.310800485	0.206079855	0.093692573	0.007392428	-0.095622421	-0.190397906	-0.339720367	-0.408191552	-0.541878844	-0.58138359	-0.690432559	-0.773691743	-0.837456477	-0.897451128	-0.950956614	-0.974552451	-1.01435945	-1.060259839	-1.075196928	-1.049086429	-1.082585338	-1.090706544
0.201589231	0.392625867	0.478904086	0.527175268	0.551548095	0.566270838	0.581284578	0.667796224	0.768447547	0.792547792	0.894548981	0.952337676	0.957897421	0.970152271	0.959935022	0.930453916	0.945631078	0.932147735	0.952394572	0.912089602	0.907435323	0.845204508	0.695873167	0.636647833	0.565649694	0.549749623	0.560583848	0.527048276	0.456941961	0.320277382	0.21551746	-0.002811207	-0.165216735	-0.34091257	-0.477293109	-0.547329198	-0.55316692	-0.607506712	-0.560011186	-0.696418308	-0.714848826	-0.826404199	-0.911458319	-0.92744887	-0.930857899	-0.954819204	-0.943637685	-0.883496682	-0.926159901	-0.946208241
0.088661016	0.242663025	0.289174693	0.384088401	0.484532294	0.57713673	0.638744089	0.683862715	0.736338288	0.847326558	0.915338755	0.975007281	0.959788279	1.007827543	0.968634921	0.973930077	1.010543319	0.993660632	0.993953723	0.930964561	0.905359247	0.798049601	0.731415513	0.738884658	0.561865509	0.602041655	0.497694398	0.387809806	0.261320521	0.210951083	0.119505928	-0.003732681	-0.078022663	-0.169934523	-0.322778788	-0.420724099	-0.455064917	-0.570714118	-0.693378914	-0.73394364	-0.821698692	-0.901310557	-0.844808025	-0.951377068	-0.961659903	-1.014980249	-0.968544764	-0.982954731	-0.976079089	-0.988208594
0.090884924	0.155446714	0.275820715	0.372895647	0.460558947	0.546364067	0.602770577	0.697143401	0.770222422	0.853142703	0.874563196	0.929636471	0.947530482	0.976862345	1.066566813	1.002027455	1.037223144	1.016865971	0.985198082	0.953186396	0.964685502	0.830657053	0.802138299	0.726963592	0.659787025	0.593307137	0.517838419	0.389314121	0.297251193	0.214347843	0.139663029	0.011558851	-0.132421453	-0.176725287	-0.33057769	-0.408200529	-0.494604129	-0.586826974	-0.660141872	-0.755551261	-0.857220199	-0.898596713	-0.95223919	-1.002786921	-1.026928771	-1.051746465	-1.072922561	-1.130869123	-1.070054342	-1.125413731
0.112424991	0.211370448	0.261568864	0.392548438	0.511530873	0.544221449	0.656460306	0.707575065	0.80709351	0.817769536	0.853492759	0.897115783	0.974162515	0.955956673	1.01819543	1.052023018	1.037975229	0.977025471	0.921211331	0.894539394	0.912817844	0.851092796	0.787210818	0.737020732	0.957599047	0.569261382	0.452559622	0.409675975	0.25192055	0.197838705	0.137340295	0.006289386	-0.073982421	-0.166209378	-0.30955911	-0.390623222	-0.481282173	-0.552413009	-0.624559841	-0.62499058	-0.748655986	-0.846892178	-0.912435715	-0.943334059	-0.960760796	-0.994664325	-1.014232306	-0.991101682	-0.967084181	-0.985106263
0.082811677	0.174037317	0.273256258	0.26147766	0.447535192	0.597823962	0.641675299	0.773138274	0.813561696	0.870520861	0.850180662	0.992824957	0.974412924	1.022193878	1.003291465	1.023406129	1.064802056	1.068212473	1.023562575	0.919643108	0.920361397	0.875376549	0.753137324	0.756696206	0.738100206	0.551109238	0.49127499	0.431855604	0.351999012	0.244592004	0.128846831	0.020080536	-0.167140919	-0.205592983	-0.342158016	-0.356801119	-0.579625654	-0.536306929	-0.693854143	-0.70989045	-0.820268471	-0.9217162	-0.994616199	-1.016359313	-1.036149258	-1.075856636	-1.071166359	-1.066113485	-1.035047623	-1.058381295
0.104413048	0.200989142	0.27637673	0.356306031	0.470512705	0.537245007	0.646320954	0.715385873	0.743037129	0.826120655	0.858319783	0.947061558	0.988440695	0.971511515	0.985703918	0.978786954	0.986544967	0.976469319	0.992060589	0.871334205	0.910473339	0.826494812	0.744261395	0.723082931	0.339763224	0.537695255	0.457013296	0.407371508	0.338422637	0.212265732	0.053724471	-0.025170949	-0.081219506	-0.19051584	-0.299697418	-0.388063719	-0.436876439	-0.548695797	-0.657374068	-0.705978961	-0.775368969	-0.803143097	-0.900604191	-0.924862323	-0.963966051	-1.007363913	-0.99292865	-1.058146363	-1.00521228	-0.978087118
-3.641656854	-1.720932578	-0.723880751	9.112940936	3.278750364	6.73896853	-2.8205195	2.304918769	3.605502363	1.417898609	-0.811918276	-2.599900513	1.308634985	0.729528877	-1.809680673	10.98967943	-0.222825923	1.942967218	1.919795357	-4.901299786	0.022289243	-3.10719125	4.192784093	-4.761510684	2.625487243	-3.128479757	6.189199877	0.269299083	-2.105782777	-2.112242985	-4.084304592	-2.581162604	-2.219029251	0.116100838	0.312116302	-2.39834322	-2.536115114	-4.364796936	-5.528055601	-4.660388364	-8.073314101	0.220045219	6.346223708	4.728675811	1.140623768	5.401986544	1.130556979	4.980615085	4.186870284	2.203383387
0.094200178	0.224185205	0.266329669	0.397171476	0.451412558	0.534550284	0.622038162	0.674647113	0.756748955	0.812241799	0.873244409	0.919965079	0.929420461	1.002201763	0.964640729	1.038969555	1.021525723	1.030248894	0.969056974	0.938256306	0.885778308	0.817171746	0.785250998	0.71465726	0.622098655	0.601689213	0.481405358	0.417849542	0.255722046	0.251287562	0.101178821	-0.017617855	-0.082637827	-0.216962931	-0.284085208	-0.393471729	-0.483690199	-0.542545453	-0.662678042	-0.721504929	-0.770959987	-0.827617111	-0.877831559	-0.944223344	-0.954602012	-0.973832774	-0.992657448	-0.971877268	-0.991178378	-0.907797873
0.095926888	0.213806965	0.262519654	0.377755245	0.508045388	0.572140024	0.640276209	0.706586463	0.806532934	0.816304095	0.883957701	0.967471649	0.989182688	0.993899594	1.039877058	1.056180273	1.04579831	1.030458395	0.986962803	0.967576335	0.919747905	0.871495458	0.798667957	0.751145063	0.668057743	0.574689656	0.489765659	0.42242645	0.30312604	0.182342237	0.155828666	0.01097471	-0.077313402	-0.169408391	-0.30093204	-0.363023066	-0.506986997	-0.596604445	-0.680869414	-0.752332049	-0.859154538	-0.86009353	-0.949555106	-0.996198381	-1.044916876	-1.060019166	-1.11580799	-1.075403331	-1.063268661	-1.057098527
0.158866536	0.32781598	0.45468372	0.5812191	0.637691801	0.715584937	0.676792069	0.719941727	0.761320323	0.788471853	0.755725969	0.839555453	0.908749168	0.981991678	0.986158912	1.041318052	1.019034182	0.947861013	0.963672549	0.873940816	0.82182876	0.803856869	0.738057106	0.689072174	0.667003247	0.668983505	0.652661249	0.616517154	0.522697142	0.346897609	0.148778421	-0.020835155	-0.150887605	-0.344770057	-0.44750373	-0.567677898	-0.624099861	-0.662475998	-0.698933633	-0.650292436	-0.709062039	-0.67677005	-0.693665951	-0.778857359	-0.8320222	-0.899002183	-0.90888015	-0.885909109	-0.892029116	-0.868079623
0.072299098	0.188997375	0.313911008	0.401111244	0.535821575	0.540998874	0.644963022	0.738117334	0.789058	0.866598722	0.913450494	0.936122946	0.984331386	1.014924681	1.022473349	1.04034259	1.016311994	1.025032337	0.995201999	0.953108117	0.908744032	0.825124748	0.817449137	0.757687391	0.682931649	0.583066179	0.501865145	0.40896728	0.309580668	0.204988281	0.100175879	0.024204908	-0.087830929	-0.213685143	-0.304596957	-0.40324838	-0.49559294	-0.597959441	-0.684917363	-0.739162814	-0.827640454	-0.884730686	-0.948446232	-0.99105548	-1.04433663	-1.075784273	-1.068263504	-1.083719445	-1.048656547	-1.056194461
0.111523101	0.201286767	0.290006699	0.361309928	0.477502768	0.553687467	0.63283355	0.714132783	0.802983339	0.881698446	0.852899467	0.950831931	0.969720405	0.992252762	1.019855559	1.005462429	1.043938651	0.988633622	0.9655766	0.991075749	0.921767818	0.859520855	0.823179674	0.745415669	0.70218139	0.579900098	0.454740423	0.426008342	0.28924169	0.242233639	0.13410008	0.010985262	-0.110979424	-0.198740552	-0.318700026	-0.417001436	-0.499181274	-0.588487492	-0.696289265	-0.735598257	-0.816527609	-0.937508821	-0.985668392	-1.026083212	-1.034455801	-1.093037427	-1.124995625	-1.084027787	-1.091112858	-1.078318077
0.096821061	0.199361782	0.243362685	0.447500974	0.490267371	0.603555872	0.566832211	0.689788149	0.807431918	0.872292506	0.92675857	0.923261379	0.979308503	1.033458472	1.031673806	1.019660575	1.011239546	1.028221877	0.970913267	0.986528214	0.898835759	0.913563653	0.819562543	0.756593493	0.658883907	0.548768716	0.478510272	0.416078438	0.280055448	0.183217214	0.162721288	-0.01129835	-0.109079277	-0.193697446	-0.303945497	-0.386651589	-0.493784723	-0.584870562	-0.704368551	-0.738304214	-0.847845312	-0.907122712	-1.004132429	-1.001272328	-1.033413869	-1.06704234	-1.06748877	-1.070157482	-1.045311304	-1.014656599
0.077809989	0.193973062	0.286339481	0.381972555	0.474692735	0.568311981	0.648207704	0.663103483	0.752691018	0.808059302	0.871237544	0.921836929	0.943050009	0.976408101	1.014816104	1.025104161	0.997906526	0.973729546	0.939260997	0.913657154	0.867354922	0.83127502	0.781357356	0.700820822	0.624012954	0.557677715	0.471770836	0.388312497	0.297313824	0.197198351	0.112104307	-0.002592379	-0.049544056	-0.218661648	-0.275546428	-0.376051171	-0.477735221	-0.552893727	-0.638141596	-0.716390555	-0.757561334	-0.838965702	-0.861283216	-0.949128398	-0.927499609	-0.984762296	-1.013281962	-1.015607924	-0.984314661	-1.016408499
0.113609542	0.223067734	0.282589996	0.365391884	0.509848483	0.545982042	0.614561104	0.65951477	0.767426891	0.836720798	0.876646908	0.947054463	0.994155614	0.95509317	1.02056102	1.000826706	0.980239542	0.970422904	0.983709564	0.916614746	0.896876742	0.818113053	0.789675008	0.694716916	0.609618603	0.54590401	0.475199969	0.385333257	0.310993095	0.205013376	0.105876246	0.01743195	-0.069103784	-0.181130894	-0.29356783	-0.375239294	-0.467510296	-0.546590501	-0.628511178	-0.711743365	-0.749823514	-0.853889206	-0.887552472	-0.928318921	-0.951937566	-0.980727574	-0.991123789	-1.003391347	-0.976135345	-0.983311513
0.033198236	0.104184091	0.161093202	0.252477349	0.318521654	0.403162295	0.458863876	0.475035742	0.522945446	0.547361698	0.611962225	0.691326766	0.819402702	0.921562717	0.953856002	0.980662112	0.958187279	0.891781844	0.824910542	0.708641569	0.653100613	0.558512394	0.538447825	0.481591857	0.474482273	0.38773345	0.341015387	0.239910202	0.197022948	0.083141999	0.020465501	-0.013794409	0.00535967	-0.091744417	-0.175407649	-0.230182573	-0.331638548	-0.394363057	-0.451946551	-0.464195134	-0.525922805	-0.59612227	-0.659681612	-0.738196841	-0.793867381	-0.907570846	-0.938810173	-0.929013571	-0.938456218	-0.87792693
0.095991266	0.218375142	0.319386544	0.386183604	0.443615006	0.545233577	0.605668368	0.724663141	0.775901573	0.799526428	0.900428916	0.971684232	0.982122659	0.991840835	0.97844599	0.996171495	0.996945464	1.005620678	0.97150052	0.881373855	0.889454976	0.82976086	0.785671833	0.711488296	0.897835743	0.539082255	0.479656507	0.361974176	0.261582055	0.199872102	0.101487624	-0.014319321	-0.100156907	-0.182795605	-0.332035987	-0.416904639	-0.471992675	-0.558949658	-0.65083196	-0.697408887	-0.754300917	-0.835574299	-0.899182639	-0.903589974	-0.965727985	-0.962407695	-1.034301453	-0.974551451	-1.03341449	-0.977688612
0.104341443	0.193367488	0.281490825	0.372530935	0.492533671	0.563414871	0.626957541	0.706938452	0.755517921	0.814797912	0.859628286	0.900687059	0.962354024	0.973331403	0.98976479	0.947774495	0.965484874	0.980178532	0.966201603	0.936956325	0.894408986	0.828039164	0.788520553	0.65354478	0.353260582	0.527778113	0.472507959	0.385730571	0.253553804	0.200923743	0.110263447	-0.025957098	-0.150321149	-0.234051625	-0.298666196	-0.351014592	-0.48758064	-0.557815396	-0.628931392	-0.703090924	-0.807325235	-0.843566022	-0.888526561	-0.917523223	-0.929799663	-0.956652081	-0.966005793	-0.993085493	-0.96717401	-1.003669038
0.114682892	0.164768932	0.260067343	0.381920878	0.47653588	0.59416978	0.639684451	0.716978024	0.792061724	0.852100869	0.92353367	0.935187657	0.979488053	0.993977514	1.05120263	1.029607627	1.033591238	1.041727453	0.986231401	0.949262236	0.937241867	0.86175385	0.805285076	0.753652499	0.636121798	0.602117551	0.501319346	0.427264849	0.294107642	0.195646623	0.090904618	0.012248568	-0.110470242	-0.212057445	-0.284630256	-0.432045312	-0.504963111	-0.566395563	-0.67510445	-0.74753208	-0.833618967	-0.916483483	-0.946577228	-0.982536495	-1.029638461	-1.047628142	-1.073089748	-1.090819289	-1.07396949	-1.056965101
0.118761784	0.191137467	0.295592295	0.406402516	0.470269922	0.54973185	0.614536599	0.69324566	0.780706215	0.846348885	0.900283274	0.923805012	1.052565078	1.002945734	0.96893128	1.026934297	1.021006433	0.993835873	0.989486465	0.984193556	0.913261387	0.858463388	0.809873395	0.709092385	0.679819363	0.578588347	0.477464525	0.391564179	0.286107553	0.213597989	0.081321862	0.022971427	-0.100806545	-0.179148409	-0.312993039	-0.41153242	-0.521393725	-0.568300547	-0.678153565	-0.749582318	-0.814591729	-0.887143618	-0.947999216	-0.983541507	-1.020344788	-1.061430603	-1.087955315	-1.075027688	-1.083158667	-1.011996195
0.045693881	0.087003965	0.187624346	0.270642856	0.354519153	0.412173194	0.463992929	0.464595476	0.504784622	0.511777009	0.606438725	0.7043223	0.775308526	0.883635761	0.956252172	0.964424691	0.924478747	0.851937624	0.798887442	0.711521742	0.614402779	0.533401617	0.509480887	0.500058226	0.442036186	0.436327659	0.354381091	0.293052077	0.191527065	0.095747997	0.017710572	-0.017280905	-0.056332137	-0.075670151	-0.172258749	-0.260466861	-0.336630414	-0.397363243	-0.484340385	-0.518792951	-0.500847829	-0.539104436	-0.608131892	-0.6767157	-0.807570442	-0.901844447	-0.930086556	-0.94602161	-0.942114311	-0.876065759
0.015209178	0.079301089	0.157495164	0.241440994	0.321982195	0.438020323	0.433677461	0.443716944	0.511613035	0.596885432	0.634349298	0.719818195	0.81063627	0.89341913	0.972030096	0.952283909	0.973584236	0.919792424	0.809781254	0.74083909	0.641243346	0.553112314	0.522956208	0.472059913	0.442695615	0.408549349	0.349158494	0.231060135	0.178340212	0.062730908	0.032950779	0.013725133	-0.023951486	-0.070822005	-0.16709721	-0.231656202	-0.360005737	-0.391173291	-0.459690882	-0.477650594	-0.517861568	-0.590443437	-0.656610065	-0.707780757	-0.824241803	-0.903505424	-0.942976403	-0.978723808	-0.956992245	-0.89977064
0.079488117	0.18682036	0.296740701	0.344819289	0.454429193	0.544774689	0.60158015	0.760826721	0.797638231	0.85722649	0.889317223	0.915743011	0.966882358	0.973803754	0.978392517	1.033394204	0.997038834	0.954347351	0.995441476	0.898906455	0.862126316	0.846365098	0.762612678	0.708273128	0.245907342	0.571148157	0.466075351	0.393449872	0.314488323	0.217183074	0.064243937	-0.019786449	-0.100301751	-0.196018698	-0.269285176	-0.371662502	-0.519027501	-0.560178252	-0.602337977	-0.703294417	-0.784686052	-0.833796946	-0.897540675	-0.93814712	-0.937517091	-0.964980561	-0.979390941	-1.015051888	-1.001656731	-1.008824434
0.084487883	0.202650385	0.261220322	0.406087164	0.441283327	0.539770785	0.600949959	0.704304858	0.785554128	0.856214315	0.887404018	0.862375435	0.961784144	0.958201581	0.975395105	1.016328036	0.981598245	0.959686658	0.917102108	0.924464986	0.883076229	0.836987502	0.740721347	0.684755591	0.499765388	0.575210497	0.441499748	0.401281674	0.293226649	0.192810344	0.105417281	-0.018457086	-0.073650218	-0.210326695	-0.291464364	-0.382849704	-0.482301016	-0.571807789	-0.6142659	-0.695920589	-0.799733214	-0.818521829	-0.909091976	-0.944283771	-0.967474481	-0.967208752	-0.994882925	-1.01087115	-0.99592451	-0.953633327
0.120269558	0.129583184	0.278926192	0.400497702	0.47967437	0.563095698	0.660677066	0.73095249	0.74468462	0.852631069	0.935147304	0.920294982	0.96987486	0.986071385	1.040770598	1.012090935	1.070038866	1.00963965	0.981452039	0.957426739	0.949262718	0.904690566	0.852778544	0.74479912	0.623588994	0.54917354	0.493242676	0.407115944	0.323471566	0.212117399	0.127425746	-0.015502186	-0.115983013	-0.268216567	-0.329871868	-0.360430348	-0.483239706	-0.623622003	-0.681401038	-0.714361053	-0.889704814	-0.908258922	-0.980316022	-0.987810846	-1.030006037	-1.067422381	-1.111285306	-1.044762572	-1.104943833	-1.102831506
0.069648168	0.201294209	0.25308496	0.37243984	0.463745501	0.552219409	0.607661025	0.717507855	0.757369004	0.902520105	0.900018734	0.992179981	0.955944821	0.992856255	1.016840008	1.024012061	1.034173	1.003628013	0.957771749	0.985890083	0.920490324	0.842150086	0.824347475	0.725373199	0.595172564	0.535486896	0.517674018	0.394832262	0.330259635	0.176469962	0.084853178	-0.04973599	-0.069989333	-0.170313759	-0.294440319	-0.359101816	-0.487564621	-0.578025838	-0.670082482	-0.698332898	-0.862859368	-0.887758964	-0.948801823	-0.995999899	-1.016830472	-1.04884858	-1.123343731	-1.057385508	-1.090299687	-1.06120154
0.127641785	0.193501185	0.27345398	0.354317314	0.465190527	0.520427166	0.62801123	0.697597773	0.747335128	0.870562788	0.90086854	0.889245403	0.948842251	1.009998833	0.987561703	1.006016817	1.017127875	0.972600937	0.961613126	0.907371754	0.88826115	0.81018138	0.753928186	0.66911426	0.641224847	0.576763754	0.493030061	0.392971124	0.320138778	0.228815614	0.081063825	-0.017320826	-0.135646813	-0.186362965	-0.297810208	-0.388515979	-0.502960106	-0.570006736	-0.629856246	-0.705756287	-0.745916044	-0.815059242	-0.87629517	-0.934157898	-0.947172438	-0.965842031	-1.007746036	-0.978023427	-1.003320314	-1.001616515
0.10807086	0.224043107	0.285871143	0.426373243	0.549497125	0.618239635	0.580950618	0.805226164	0.73343341	0.843970394	0.919071295	0.920922594	0.996944024	1.00293359	1.037443848	1.03796368	1.005716743	1.008546234	1.013089772	0.988866166	0.945944335	0.876187145	0.836325785	0.701267116	0.673500873	0.578028577	0.548427979	0.455677466	0.303254671	0.167025285	0.144921511	-0.00198728	-0.11096608	-0.203407067	-0.317262107	-0.423013262	-0.490448282	-0.599614327	-0.615527156	-0.858463253	-0.882543708	-0.875456107	-1.004734364	-1.036047267	-1.045097388	-1.051693643	-1.052737512	-1.080210752	-1.036010853	-1.077019015
0.114477908	0.186278549	0.283303036	0.361387151	0.465583679	0.565923212	0.617632646	0.722977978	0.782774698	0.813834417	0.886231625	0.933638242	0.970025267	0.979212494	0.984456841	0.975622644	1.01121423	0.986727775	0.963176571	0.92364247	0.874043251	0.837514724	0.788480726	0.697355587	0.636752128	0.544413729	0.487512206	0.378577705	0.313981751	0.216484269	0.117381661	0.00189841	-0.104905233	-0.206794637	-0.296102695	-0.353904878	-0.463423183	-0.562060505	-0.646125975	-0.716264354	-0.777488879	-0.816937599	-0.859125251	-0.923416606	-0.992414368	-0.964175576	-0.984489849	-0.992035672	-0.998335989	-0.960923479
0.096574481	0.173909282	0.250219808	0.389502919	0.438587811	0.569338894	0.614203943	0.740653172	0.762329987	0.820534678	0.885888293	0.943867514	0.952900365	0.957393614	1.016796832	1.001378321	0.987266423	1.011593804	0.930391888	0.952573065	0.863734391	0.821305187	0.776574092	0.656992568	1.026860982	0.552003221	0.490836482	0.394526008	0.305955413	0.194338288	0.115659218	0.000774248	-0.099144144	-0.181208245	-0.261077834	-0.405465423	-0.44439129	-0.551804126	-0.654521566	-0.715648414	-0.735756991	-0.819686978	-0.881683117	-0.889192805	-0.938888376	-0.973569989	-0.965583731	-1.002424336	-0.995397613	-1.03117828
11.18219924	6.070872627	-5.506861494	12.59534921	4.039449197	0.201468068	3.852255365	-7.74806538	12.39794658	-16.65167434	-10.53388878	1.316055525	-15.05370855	10.86848609	-5.791003483	9.350027775	21.97225949	-8.879532597	-0.505335447	-4.37879281	-6.749604879	-3.01260663	-4.980593815	6.343981485	13.92626738	13.48347016	-11.91358477	-24.23636607	-10.77496756	-5.043336866	3.790853607	0.966914173	10.96098501	-18.76860438	-23.0435105	7.029204022	0.372737212	-5.232315502	6.386810455	6.458518281	16.87830593	2.986864941	-12.8583391	-3.485667198	7.579959871	16.09160045	-17.69523766	-2.626824259	-7.255047573	14.00472551
0.679040635	6.172512008	4.410893627	1.74668903	4.595893848	0.771970843	-3.438776307	1.721681384	4.417117086	0.857950734	-0.441237432	-3.617764918	4.584297659	4.458786077	-1.360249262	3.650142613	5.859512248	4.930152339	6.556400336	1.023948963	3.439316064	7.748419559	6.283568795	0.585301811	-5.044044536	-5.063167806	-3.508829168	-4.65532911	1.190204086	2.659004621	5.195564811	0.300250604	-8.794082622	-2.37501282	0.600780598	8.634140467	8.31878097	4.542350175	-4.535861763	-0.506018035	2.744463811	1.461524468	-8.299910072	-7.709381827	0.586731507	-2.338757363	-6.609083137	-8.924858823	-4.643532695	8.721762465
0.087990425	0.160275229	0.287855221	0.394534708	0.456977898	0.566933443	0.611429475	0.690835293	0.789321393	0.833559484	0.901921206	0.921824049	0.956759208	0.982176882	1.029110438	1.0044653	1.010809583	0.976314908	0.970060875	0.928500942	0.892198794	0.837424444	0.767627358	0.733287885	0.61169387	0.558802707	0.508183183	0.423035862	0.271898184	0.178243173	0.105891414	-0.010866642	-0.090894005	-0.19424165	-0.289302652	-0.385111614	-0.488690852	-0.564087178	-0.627265663	-0.705725186	-0.767644748	-0.80785145	-0.883174572	-0.927171238	-0.942731977	-0.973563605	-1.007404277	-0.998840809	-0.996665041	-0.968502345
0.048996844	0.156741029	0.352031864	0.453421534	0.559290897	0.568452715	0.451680881	0.34065639	0.203729415	0.082224156	0.079525035	0.191431598	0.316751322	0.471502271	0.615226295	0.632173351	0.594434588	0.482043727	0.323136128	0.195547775	0.088018533	0.091443382	0.191069871	0.307408186	0.479620847	0.548849231	0.584499991	0.509631663	0.341365886	0.185265522	0.054717146	0.002741588	-0.01851778	-0.147929166	-0.336562393	-0.457801292	-0.558029087	-0.550847921	-0.462388	-0.318551197	-0.187000683	-0.0903171	-0.085477334	-0.169875503	-0.31765857	-0.495877846	-0.632537709	-0.67672639	-0.582123574	-0.475842035
0.19159753	0.398835007	0.557494516	0.629165926	0.685247874	0.750421273	0.702985784	0.724890725	0.733987442	0.708410508	0.753788954	0.84879435	0.904463295	0.961353808	0.977671594	1.046080685	0.996565055	0.959056396	0.910690341	0.800445739	0.776055166	0.746595848	0.737062263	0.785328663	0.716843908	0.747511036	0.733455822	0.658048152	0.536629442	0.387234392	0.187448365	-0.005913309	-0.172058604	-0.386519699	-0.461979523	-0.607428047	-0.618095965	-0.667340859	-0.666065557	-0.634459319	-0.66350955	-0.650587446	-0.689404193	-0.720976365	-0.821472978	-0.872975454	-0.885490252	-0.936162844	-0.850860168	-0.843871087
0.087606957	0.192201733	0.282844307	0.423437798	0.488765826	0.551093808	0.668360119	0.707280565	0.701105781	0.900306764	0.890224863	0.908510834	0.926374399	0.972835495	1.025906463	1.012718014	1.049479239	0.903003331	1.040846728	0.958519494	0.901821569	0.817846427	0.737458988	0.716724717	0.647456907	0.610462326	0.465635079	0.432157819	0.259697762	0.204078291	0.113858675	0.01193005	-0.061353152	-0.199543532	-0.314777281	-0.308328208	-0.499225243	-0.563146903	-0.639959376	-0.683804887	-0.750290799	-0.845440611	-0.833149713	-0.918124117	-0.916944555	-0.984238575	-1.015280686	-1.007978322	-0.948310168	-1.028174487
0.055868556	0.179535082	0.35660591	0.529690164	0.577015621	0.547024541	0.390624922	0.164193516	0.025730707	0.179815196	0.196638685	0.141827685	0.011107945	0.175190414	0.340982092	0.376509584	0.331565378	0.180170606	0.000397642	0.159822632	0.226141273	0.19600074	0.014869376	0.174480821	0.408728237	0.553903188	0.584616814	0.534562596	0.363124465	0.200481812	0.047178074	-0.024386666	-0.04343482	-0.206255331	-0.38284925	-0.50195384	-0.579538899	-0.536136945	-0.390243252	-0.199531536	-0.014483897	-0.169149955	-0.238207347	-0.158133325	-0.036508968	-0.177761429	-0.30257422	-0.383628217	-0.310086658	-0.17383366
-1.464461945	-1.354092002	-0.615048197	-0.559903629	1.725449248	1.266292976	-2.079766533	-0.989701706	-0.414537791	0.783615987	1.243669659	1.880785383	-1.460481232	2.999298874	-0.117249214	-0.411449925	-0.419777604	3.553046981	0.190095498	1.311992449	0.955275422	2.30249674	0.777892049	0.025699962	2.595278943	-0.553749305	1.34392652	-1.015603584	-2.510068059	-1.910276859	-2.234856465	-0.461223985	0.23049519	0.320860433	2.096117285	1.250266476	-3.644759383	-0.240157745	-0.616115312	0.679368128	-0.779795701	-1.194957102	-2.888452978	-0.065325513	-0.738866543	-0.930118029	0.151897325	-0.940484936	1.599296177	-0.771100366
0.102873279	0.224652337	0.278835233	0.357868882	0.481083594	0.543303487	0.621985183	0.709756144	0.77070918	0.833311449	0.877306001	0.918171938	0.973300129	0.995246007	0.992178531	0.981027274	0.965058965	0.977686788	0.909512027	0.926218582	0.864689775	0.831005038	0.745169157	0.709739911	0.646007971	0.538910529	0.468694123	0.378302792	0.272405935	0.206464266	0.083096065	0.006820156	-0.075572581	-0.194335078	-0.288435421	-0.385720449	-0.454716655	-0.563493077	-0.656028735	-0.712412333	-0.761203481	-0.824627157	-0.873705798	-0.93155061	-0.954200523	-0.948767574	-0.980234515	-0.98176688	-1.009681984	-0.960401243
0.123754962	0.222808211	0.314853805	0.37959359	0.452144503	0.544058607	0.627316987	0.69646801	0.751356958	0.825405089	0.885974102	0.924050924	0.97761227	0.974594471	1.026847148	0.998092173	1.027946122	0.961951758	0.956053705	0.963257951	0.895947603	0.822018495	0.788325885	0.703692388	0.632601514	0.560161123	0.448371587	0.39687649	0.300254519	0.212432434	0.089519605	0.015174702	-0.103956596	-0.182837073	-0.301986903	-0.388522925	-0.445678546	-0.551648256	-0.645738964	-0.708744448	-0.777928053	-0.813634195	-0.892231334	-0.917485881	-0.937334037	-0.952410423	-1.009894854	-1.010332733	-0.954492998	-1.012254933
0.116679394	0.191636534	0.322736374	0.389707005	0.474243399	0.564385087	0.6427913	0.761450904	0.785561491	0.813729496	0.917986318	0.954896445	0.992256865	0.993181612	1.016551683	1.012609837	1.001151638	1.013773635	0.939831793	0.921278605	0.900425447	0.868884819	0.777935247	0.744789273	0.655863632	0.552249314	0.467777995	0.453675939	0.279656496	0.187021434	0.112721284	0.010401117	-0.093689325	-0.187074262	-0.286588804	-0.402941472	-0.509837305	-0.554980175	-0.617042703	-0.717162945	-0.819024876	-0.852243569	-0.920661335	-0.948170295	-0.999356302	-1.025431159	-1.091972436	-1.081350792	-1.053827718	-1.023486729
0.221241885	0.44924635	0.579113493	0.586997015	0.626782404	0.569912063	0.59110628	0.611080494	0.696867232	0.777346752	0.912047087	0.941998093	0.925954926	0.856723579	0.889364032	0.873685875	0.897500871	0.966409239	0.915665696	0.973968135	0.939560245	0.792312622	0.686711086	0.613219732	0.573595693	0.583475629	0.615877012	0.614898355	0.581781752	0.445992356	0.211876643	0.025989522	-0.23097146	-0.44435282	-0.528161357	-0.615755977	-0.628314525	-0.580135348	-0.601170814	-0.65095295	-0.700825438	-0.820743207	-0.825661591	-0.957911991	-0.899789117	-0.908843001	-0.853013171	-0.842349941	-0.866319484	-0.931963033
14.35877086	-12.71110319	-3.744493131	4.322493137	-1.817932646	22.73004808	0.152484906	0.830869248	22.86538738	-15.53612499	4.668608276	-16.64536279	-8.439664321	5.911973092	4.241518287	30.34512536	1.135726075	-0.105555229	-4.494535619	-21.79978758	-2.158622719	-18.62098459	18.60961631	8.867859857	18.84306785	-5.059174597	-5.393168143	14.19005047	19.72809018	4.265177563	5.083844777	-8.82979349	-0.894289049	3.53377287	-3.92181939	13.64984155	4.538044918	-9.599763316	-13.32739743	24.98428749	15.97072317	-15.22352171	-3.832421252	-1.974136528	-28.71376989	23.26371598	6.910150277	14.2514017	13.21117985	8.605185359
0.118748009	0.206018138	0.296899356	0.388093346	0.462420918	0.54440288	0.593541986	0.750664656	0.82473434	0.851705132	0.900156665	0.911201158	0.941689859	0.961070241	0.985156504	0.991041247	1.012748174	0.985879152	0.972584217	0.939610993	0.893880954	0.827006761	0.760006731	0.720032866	0.253712912	0.594785214	0.460770352	0.359079797	0.274435739	0.197974587	0.096445696	0.016718223	-0.099098004	-0.188738005	-0.291932335	-0.394602791	-0.490644011	-0.564526666	-0.594939614	-0.706312426	-0.779830799	-0.834208473	-0.936424017	-0.953764804	-1.002986623	-0.934273317	-0.980467618	-1.005627552	-0.980252145	-0.984876272
0.126611926	0.215640712	0.283194693	0.366729532	0.506868817	0.596178602	0.627935174	0.698360151	0.800198077	0.81658926	0.895425743	0.915687936	0.957955563	0.968126558	1.025981183	1.037521892	0.974320925	0.949397621	0.984194106	0.890609684	0.890594737	0.82877543	0.804661824	0.682957955	0.639111451	0.580661348	0.487036726	0.390724143	0.27527536	0.175050981	0.118170832	-0.019135907	-0.117644898	-0.179272837	-0.28951182	-0.388112809	-0.452544473	-0.559825001	-0.63631434	-0.687473638	-0.791131244	-0.829917795	-0.878339091	-0.925929744	-0.973607511	-0.944082916	-0.964945497	-0.991166724	-0.964823104	-0.980307801
0.074441267	0.169263669	0.322231311	0.384663988	0.444457865	0.569777726	0.635693353	0.706466813	0.73228984	0.885035831	0.911858203	0.922134971	0.876893105	0.958820233	0.995551704	1.024020282	1.038330692	0.948803417	0.946334556	0.963506079	0.842699984	0.819978502	0.765667208	0.716015053	0.668734056	0.501792205	0.490694537	0.367207816	0.265045645	0.211442023	0.148749946	-0.031339293	-0.061491659	-0.179796347	-0.292726729	-0.321041332	-0.476665124	-0.47711834	-0.660639167	-0.70684467	-0.785628324	-0.825116687	-0.85773363	-0.935488771	-0.963831333	-0.957427791	-1.063011394	-0.962212207	-0.966301671	-1.004800529
0.085916641	0.17932244	0.292097945	0.366764654	0.486950552	0.568170436	0.609854889	0.677585572	0.743145156	0.828796726	0.883439889	0.934196732	0.937003951	1.008765698	0.967574628	1.01871443	1.026246437	0.966077937	0.914519841	0.9277649	0.887442663	0.839301468	0.77833742	0.702979732	0.64660566	0.579778012	0.460793876	0.377692302	0.288871228	0.219196477	0.101014177	-0.000579291	-0.097879833	-0.179309469	-0.257727584	-0.349750396	-0.475318408	-0.56853053	-0.611981378	-0.688645449	-0.777379347	-0.807202644	-0.874835817	-0.931794845	-0.964856976	-0.969812756	-0.994177553	-0.992918045	-0.989635183	-1.002425947
0.190477277	0.326653873	0.477866252	0.603257193	0.649013804	0.701884143	0.692435503	0.729379372	0.717106699	0.772850593	0.807455192	0.84450343	0.925325558	0.937608548	0.962033592	0.997588744	1.021078499	0.972692239	0.916829239	0.859695103	0.820308702	0.80996321	0.766022181	0.726647699	0.700102157	0.700593414	0.669305198	0.55764936	0.461944542	0.350801991	0.149296278	0.029890022	-0.139407959	-0.360369214	-0.458419918	-0.551334968	-0.643429604	-0.63093307	-0.607652781	-0.672556574	-0.680592075	-0.737387218	-0.759931027	-0.745106601	-0.830828226	-0.896001544	-0.906335796	-0.900316023	-0.909293348	-0.840356467
0.038383962	0.086325722	0.252285322	0.337815903	0.456517357	0.505204762	0.440987812	0.429814826	0.374008427	0.362521871	0.401018121	0.472844669	0.582691873	0.717369819	0.850590804	0.8620158	0.831747652	0.716938478	0.592521711	0.470383613	0.364757567	0.34939791	0.381672518	0.431846785	0.520751015	0.502263829	0.459645943	0.365193662	0.253638921	0.117710045	-0.008655664	-0.006560827	0.006881289	-0.161248008	-0.284575816	-0.375331439	-0.459898297	-0.51020835	-0.506934062	-0.40234397	-0.36450852	-0.373797222	-0.377475878	-0.506456602	-0.627032022	-0.680951079	-0.825407722	-0.860394836	-0.836715884	-0.72471661
0.102533066	0.185193357	0.306402082	0.410427937	0.474247783	0.577141713	0.631336407	0.719218013	0.756235785	0.81039321	0.848677548	0.913131123	0.951142279	0.997482236	1.003118404	0.979967527	1.03460495	0.989324763	0.946380084	0.898211118	0.86778863	0.844322649	0.762198512	0.706811426	0.631656944	0.538941496	0.484043804	0.388531617	0.328581919	0.198743259	0.076307439	0.001201862	-0.102938188	-0.15241128	-0.288455379	-0.371261873	-0.452678843	-0.581403768	-0.622013476	-0.720719031	-0.779306703	-0.858738491	-0.884481778	-0.925491778	-0.965669055	-0.990170287	-0.981705367	-0.988679324	-1.023808303	-0.948213474
0.064335492	0.264373325	0.266121131	0.413506749	0.479414318	0.532425036	0.607452125	0.70918498	0.783500302	0.747076131	0.917162288	0.9443279	0.934088825	0.997941351	1.023212974	0.98692462	1.014409791	1.004900292	0.961904728	0.944905746	0.921271602	0.914771795	0.839439509	0.705466164	0.613169258	0.614909941	0.508457823	0.356667164	0.335773945	0.203719367	0.090885383	0.069350343	-0.182228875	-0.179537089	-0.29463824	-0.407685291	-0.499127257	-0.68436114	-0.67828708	-0.802225394	-0.841112214	-0.889280698	-0.957074402	-1.015903229	-1.000116549	-1.051159745	-1.125520982	-1.096315406	-1.088009608	-1.096638311
0.152388433	0.21369993	0.309500478	0.418994891	0.521344282	0.545204944	0.59248598	0.760157623	0.687164751	0.828543466	0.925970237	0.950014408	0.942976765	0.969063335	0.998316097	0.961053585	0.956997449	0.970462314	0.905864147	0.909085849	0.842019025	0.825706777	0.772401593	0.698336133	0.622135532	0.614488281	0.423983791	0.348877537	0.255665105	0.202568186	0.100702647	-0.039708231	-0.07584433	-0.202147149	-0.252655542	-0.350985557	-0.437698254	-0.499911258	-0.610116177	-0.731939118	-0.770141497	-0.81665625	-0.865960246	-0.957841519	-0.953350556	-0.986598827	-0.982248299	-1.032670561	-0.962722163	-0.974475357
0.069215466	0.24015492	0.301754164	0.365487115	0.442960339	0.589328911	0.613842631	0.693931759	0.754584917	0.833309673	0.86659137	0.932139123	0.981207563	0.961570434	0.982543144	1.041697637	1.01155958	1.002740503	0.949944929	0.910028607	0.922646823	0.863502646	0.814857582	0.679345653	0.835144742	0.521941591	0.451829602	0.384666095	0.276423407	0.183133596	0.112743608	-0.007143251	-0.145344133	-0.213051329	-0.276754669	-0.392875738	-0.474244508	-0.487942827	-0.621274344	-0.714481014	-0.774926295	-0.819580238	-0.852433484	-0.943184732	-0.965302621	-0.989237832	-0.993449748	-1.001576778	-0.971518652	-0.965805559
0.041454529	0.137161343	0.272514274	0.390455662	0.448188137	0.509740892	0.485572258	0.444338551	0.379380774	0.373429264	0.421512221	0.490708297	0.624982479	0.711091703	0.830631721	0.859841684	0.818380334	0.76679921	0.618351434	0.49580909	0.404343193	0.363966981	0.371762665	0.429802425	0.489189145	0.501498417	0.451062805	0.370249858	0.229187957	0.125011789	0.048251614	0.010240186	-0.025393694	-0.145555772	-0.24835507	-0.392294241	-0.479168457	-0.482100547	-0.491071841	-0.448132521	-0.380041576	-0.34888256	-0.416560702	-0.491571819	-0.615540598	-0.733159083	-0.822927069	-0.885395577	-0.814852635	-0.755932544
0.07403567	0.210895486	0.305826731	0.354422093	0.462210917	0.580732476	0.628816734	0.700231346	0.760639022	0.819679841	0.89470189	0.914350298	0.948426094	0.992021376	0.99305025	0.987345726	1.00243416	1.004605617	0.955588561	0.928778757	0.87362414	0.881825282	0.778934166	0.708967533	0.624807005	0.53733667	0.49653821	0.377533298	0.301805415	0.204996574	0.097250472	0.007771583	-0.107657532	-0.190877077	-0.269910735	-0.388050526	-0.493513647	-0.567419263	-0.63272135	-0.697941449	-0.751184938	-0.85499889	-0.893046707	-0.907521603	-0.977226899	-0.97591287	-1.000719816	-0.984145105	-0.982630888	-0.960001541
0.097130414	0.201139594	0.382330676	0.380829678	0.492912561	0.563288015	0.604789945	0.684500832	0.793378462	0.864583695	0.86013966	0.917298103	0.971640903	0.959992352	0.941615912	1.014413896	0.980105967	1.024098604	0.945857118	0.853415743	0.921644019	0.846252052	0.825937125	0.762044922	0.609001627	0.560023048	0.485314322	0.376865508	0.286012584	0.176420309	0.119811024	0.03310677	-0.129063228	-0.163174031	-0.329963731	-0.406725129	-0.448502746	-0.527002639	-0.639685733	-0.741936851	-0.747208983	-0.852732371	-0.879497371	-0.923349118	-0.921201997	-0.958246339	-1.038912895	-0.992770454	-1.007642143	-0.980193591
0.08286045	0.257198338	0.453725185	0.642132319	0.717422064	0.64700169	0.473563799	0.422005528	0.617898317	0.793083623	0.929521201	0.970882274	0.895888041	0.860897218	0.814052252	0.837153375	0.82980412	0.84728687	0.896586627	0.925137499	0.958758804	0.832292568	0.647437646	0.430307879	0.506685631	0.641042008	0.716229493	0.637965796	0.467672672	0.24050928	0.059112516	-0.001172678	-0.058952489	-0.272331868	-0.474480086	-0.664372392	-0.749759148	-0.665086671	-0.465027566	-0.42333446	-0.582879428	-0.826271875	-0.952078445	-0.947601335	-0.922010463	-0.852344852	-0.820092158	-0.861682539	-0.816348937	-0.827298701
0.066778172	0.216328429	0.293754953	0.393186729	0.485018495	0.545139855	0.628207927	0.723054486	0.782787129	0.835087765	0.916277952	0.938249827	0.969356098	1.004255227	1.017976162	1.020478135	1.052998448	1.032191862	0.999321636	0.952163049	0.938375041	0.867211979	0.778963889	0.739279128	0.670035881	0.620037867	0.523028428	0.40247138	0.313614817	0.229828062	0.100350956	-0.013207305	-0.077690485	-0.251262747	-0.314644955	-0.425152783	-0.525304184	-0.59821248	-0.685740671	-0.754152163	-0.800756591	-0.910947791	-0.932545677	-1.001902149	-1.04373486	-1.057542118	-1.09067235	-1.08197741	-1.101737558	-1.052254751
0.09601458	0.221951351	0.292824346	0.39873824	0.487761388	0.581465617	0.665358053	0.706821697	0.743907519	0.859165525	0.926003064	0.978269471	0.967691339	1.057224259	1.026774608	1.024530249	1.046854938	1.028010229	1.01788382	0.957162108	0.883883324	0.836784007	0.832691274	0.72376841	0.632113915	0.580418717	0.511262487	0.427690575	0.344393499	0.233660011	0.121122645	0.034319042	-0.067024769	-0.199804468	-0.346108914	-0.404358927	-0.505075181	-0.597394829	-0.671130661	-0.762865691	-0.81339134	-0.878966123	-0.910073857	-0.992650999	-0.993111245	-1.071424088	-1.048876228	-1.07603695	-1.078459173	-1.055506409
-1.012917061	-6.74716306	-3.992642314	1.970931865	1.294602514	12.22365953	0.636778912	2.282309664	6.646351642	-1.19226919	5.626162369	4.594206818	8.027052061	0.603580275	1.807819708	3.567952038	-2.383810046	2.365922269	-6.980401001	-1.169181958	9.123673769	-2.139896535	1.824459766	1.5923101	-1.144389328	-4.350829651	10.20164426	-1.078992495	-6.282181389	0.98542113	-7.568281894	-7.592193751	8.279623284	3.589462469	-2.837020526	-4.000734602	-4.812679692	7.278562038	1.624565109	-8.068198178	0.106986634	-1.922142941	0.555373067	-6.163302344	1.293300285	-9.848339963	-3.376089914	6.373106311	0.234479423	-0.151462752
0.032828353	0.171716228	0.365268312	0.518310956	0.57819816	0.544340329	0.421606384	0.21263206	0.02590967	0.12083805	0.159899224	0.101444458	0.037574117	0.202778206	0.374818048	0.414959215	0.362670409	0.252128506	0.076167308	0.068389811	0.167503408	0.135455166	-0.002001089	0.216111837	0.394916112	0.531783135	0.581220797	0.517239627	0.37644261	0.200778105	0.045969544	-0.010148683	-0.019729418	-0.193620311	-0.37923684	-0.512715503	-0.613166167	-0.538512633	-0.411337715	-0.225535361	-0.0078996	-0.110200756	-0.182899338	-0.081030456	-0.049152704	-0.224406703	-0.35109714	-0.415142337	-0.366975238	-0.245075154
0.11092991	0.142260627	0.328193479	0.372332633	0.491909283	0.533052434	0.655889606	0.707580265	0.776740903	0.805746632	0.889007764	0.939797153	0.934718346	0.974879977	0.961497098	0.994419944	0.95687629	0.978772697	0.993814219	0.925975445	0.864547243	0.821267684	0.773980966	0.724477812	0.924183608	0.52009277	0.467845585	0.391516994	0.285419166	0.179765801	0.090486394	-0.004841566	-0.124338314	-0.180094284	-0.324467921	-0.380101191	-0.490082279	-0.549534756	-0.625672365	-0.708948454	-0.769102326	-0.806993235	-0.858943681	-0.909534952	-0.968007073	-0.991318641	-0.974744256	-0.986477424	-0.97163886	-0.993401884
0.106511031	0.190471435	0.322918574	0.355440968	0.473396617	0.596490816	0.637475121	0.672434538	0.76716245	0.860804863	0.90940888	0.948952853	0.988073468	0.972886162	0.960986392	1.039132706	1.019521793	1.035694483	0.970515125	0.96267294	0.92502722	0.860970542	0.783835554	0.734221247	0.664568501	0.562379959	0.436485999	0.4205827	0.314214104	0.192364159	0.089659208	0.018048931	-0.116767784	-0.220373276	-0.236187147	-0.404364222	-0.532540357	-0.572729919	-0.669967296	-0.747972282	-0.879598712	-0.839516712	-0.973337706	-0.975944184	-0.988349918	-1.033841686	-1.130441371	-1.05345036	-1.061531979	-1.100687423
0.093623288	0.182635424	0.251778414	0.398853562	0.456791204	0.532748202	0.615963771	0.685416853	0.791532135	0.835892187	0.887667526	0.920856016	0.983742699	0.98715138	1.00788251	0.967719629	1.005382336	0.96565781	0.950956601	0.93249901	0.871249774	0.834833994	0.766665873	0.695673621	0.662671971	0.562773464	0.482199525	0.391520795	0.314543499	0.178336323	0.115745949	0.02152672	-0.109811102	-0.192058277	-0.289849725	-0.348728976	-0.472128972	-0.559723878	-0.611704016	-0.683985134	-0.77996147	-0.867804716	-0.888114038	-0.930146724	-0.976077503	-0.948885464	-0.99351002	-1.007884725	-1.012134392	-0.974435949
0.21849799	0.431148216	0.579944198	0.619949213	0.60295608	0.566696026	0.543887274	0.590718905	0.726280639	0.760541032	0.929888421	0.924657768	0.944061488	0.924399623	0.915488527	0.878473551	0.870828088	0.919209374	0.943431719	0.925582501	0.908073449	0.776140947	0.696441228	0.604336043	0.610025277	0.584562256	0.634627478	0.640593771	0.567836413	0.422853216	0.222001673	0.017800679	-0.223561717	-0.476918533	-0.548911895	-0.611509013	-0.61700265	-0.601995372	-0.589346245	-0.606112123	-0.687088248	-0.806197949	-0.86423258	-0.893512719	-0.945958086	-0.87861112	-0.874746731	-0.879274295	-0.885451584	-0.918878257
0.165441497	0.361347365	0.525446178	0.582000378	0.693425336	0.708791016	0.679367742	0.71515057	0.708233667	0.734580622	0.755256491	0.859189115	0.890705278	0.953971456	1.016952975	1.032998081	0.997845713	0.939828878	0.876309899	0.827342916	0.779608168	0.741739781	0.753701575	0.736003779	0.696409579	0.703999861	0.672806693	0.621274387	0.540174794	0.334186093	0.232686761	0.019074445	-0.19051085	-0.337814573	-0.442951379	-0.542853544	-0.650057969	-0.649646296	-0.637292211	-0.674616138	-0.658144676	-0.64271907	-0.708108003	-0.739229819	-0.78645339	-0.862045651	-0.871774207	-0.897602144	-0.865706006	-0.859235326
0.023780645	0.248155365	0.492951121	0.600812614	0.637852922	0.556664049	0.374893266	0.326571174	0.451657938	0.696820304	0.791935681	0.800219799	0.6865133	0.61159863	0.592852148	0.597055122	0.613430588	0.640770812	0.723563309	0.811250845	0.796855626	0.651599684	0.490862138	0.311492008	0.393443484	0.520356598	0.662591954	0.595937131	0.398990163	0.197451161	0.053905545	-0.064495963	-0.060659781	-0.229903583	-0.474332619	-0.591189031	-0.681926752	-0.567053729	-0.406320509	-0.305877148	-0.451609626	-0.727200875	-0.773632077	-0.752883108	-0.741389229	-0.596846808	-0.573117648	-0.597100689	-0.639126162	-0.599973114
0.117305728	0.20501217	0.295277037	0.423549782	0.491588534	0.559860211	0.593198353	0.690933886	0.74391749	0.813607304	0.872170354	0.944477246	0.990568372	1.010058974	1.019772595	1.062858562	0.994724777	1.003027138	0.982325475	0.932087748	0.913028714	0.898791857	0.799221183	0.721555706	0.640453002	0.556561235	0.469981799	0.419259962	0.283183542	0.233083678	0.095621621	-0.01755113	-0.091902119	-0.223231984	-0.249875204	-0.40581625	-0.499086812	-0.581577038	-0.650897848	-0.749271366	-0.807446444	-0.870397319	-0.944098459	-0.957860511	-0.990724073	-1.026753848	-1.060371666	-1.052144775	-1.015166003	-1.080677863
0.040058613	0.146407552	0.273088756	0.339197485	0.450810706	0.465705201	0.463098612	0.405838361	0.34711818	0.390086455	0.362144749	0.477790293	0.601975382	0.722325386	0.825512025	0.843307278	0.83491556	0.724676171	0.582851105	0.492456606	0.379510997	0.357517998	0.362609463	0.441274371	0.489008381	0.49459159	0.502038376	0.391769975	0.286714932	0.117862542	0.016681053	0.021398865	-0.024900937	-0.121720143	-0.248578787	-0.403165781	-0.484176666	-0.505284701	-0.475066051	-0.433932981	-0.377004389	-0.387925514	-0.410085128	-0.448145286	-0.587861326	-0.702207217	-0.840023319	-0.872995112	-0.830190466	-0.735165165
0.105929236	0.186226583	0.26570573	0.355682507	0.507388153	0.519508766	0.649126458	0.704014663	0.773951021	0.852221172	0.862387148	0.939811189	0.953259124	0.993872031	0.972600782	0.999504861	1.000616134	0.960330175	0.950886568	0.927689704	0.892146511	0.845356796	0.798030434	0.754922998	0.375448465	0.518691121	0.456091869	0.352932192	0.315096079	0.195233038	0.115684789	-0.070350356	-0.0711534	-0.165360081	-0.296487581	-0.39514614	-0.472102009	-0.600392606	-0.622662181	-0.713837894	-0.779570873	-0.82921781	-0.875136282	-0.939166249	-0.96039196	-0.973610899	-1.017757076	-1.027197869	-0.990186594	-0.968006322
0.259138735	0.432911811	0.535283569	0.695801257	0.740164355	0.745021252	0.722429708	0.70880417	0.705550125	0.714309277	0.748995403	0.803195492	0.88388449	0.946225158	1.00368089	1.021556922	0.97140794	0.923753804	0.861609413	0.79592061	0.746317609	0.672974481	0.679161656	0.733699565	0.705923541	0.776876185	0.764438872	0.677310169	0.605152599	0.449544798	0.230509491	-0.006768343	-0.222554766	-0.364246913	-0.551469847	-0.661031085	-0.711261999	-0.711627596	-0.680012693	-0.649376602	-0.669866474	-0.668696131	-0.662752624	-0.742204589	-0.76256693	-0.845559236	-0.873498193	-0.844904436	-0.866006456	-0.842942713
0.066529119	0.1806684	0.293258765	0.391131131	0.458603269	0.56194617	0.690967521	0.693278629	0.809023282	0.898742699	0.879037637	0.919616749	0.961496467	1.013940551	0.993545262	0.971156329	1.013058779	0.983382275	0.950581584	0.942909105	0.864239058	0.846192336	0.748503538	0.755212289	0.664604815	0.529337395	0.465400871	0.359916437	0.28670308	0.229323566	0.14719727	0.001467863	-0.111499959	-0.208854752	-0.255443338	-0.399306739	-0.520984135	-0.55558752	-0.609698164	-0.697843182	-0.779318236	-0.891979087	-0.868034109	-0.925147585	-0.931797471	-0.999869899	-0.984690021	-0.959108222	-0.984779996	-0.988515404
0.09727488	0.204689926	0.306641356	0.391480595	0.49691751	0.537297002	0.64214667	0.704569612	0.783974479	0.83793711	0.91744407	0.97033575	0.953927618	1.000291158	1.024803472	1.030259072	1.030736498	1.019127223	0.997047011	0.969140567	0.932595358	0.870451158	0.811248772	0.734439814	0.673053924	0.596650264	0.492252338	0.411879465	0.283476193	0.205931433	0.076546446	0.009998591	-0.117739246	-0.2213805	-0.288479155	-0.410661698	-0.476499642	-0.612816997	-0.67944477	-0.730261935	-0.831997491	-0.878317913	-0.964513624	-0.983694961	-1.017266074	-1.093333794	-1.05310199	-1.061923958	-1.063624195	-1.068672706
0.054050954	0.26496752	0.293687164	0.466619857	0.428846287	0.544540095	0.65287322	0.706898646	0.771755436	0.854250255	0.865952454	0.937492548	0.995014767	1.01280763	0.996493254	0.974048613	0.958116824	0.967406176	0.960633783	0.878322523	0.907188123	0.91605613	0.739702175	0.698387129	0.616342443	0.485229497	0.481172702	0.374792847	0.270396677	0.243635683	0.149162008	-0.025372194	-0.044227388	-0.169393912	-0.316248457	-0.389365924	-0.410695223	-0.66367016	-0.572675765	-0.701209866	-0.795816193	-0.784532863	-0.858269522	-0.930024253	-0.959461982	-0.983418698	-1.033908506	-1.011921836	-0.939380715	-0.971561677
0.121417688	0.218479402	0.294242308	0.339954203	0.497213317	0.554240763	0.628416417	0.715147225	0.795866487	0.810973388	0.851149463	0.93878996	0.929174496	1.003210852	1.022203311	1.006905452	1.000268278	0.960278845	0.997452784	0.946359634	0.868079	0.798906404	0.795728883	0.676818729	0.902036459	0.572884767	0.501285721	0.406591203	0.287737969	0.22949169	0.094867226	-0.03008382	-0.09247878	-0.201615952	-0.303329185	-0.348694946	-0.459585127	-0.571839666	-0.614813029	-0.742959844	-0.76949603	-0.819795323	-0.897178087	-0.955867957	-0.87853412	-0.988910826	-0.970866116	-1.031444993	-0.9881256	-0.961314452
0.212352217	0.343952873	0.444189149	0.585897693	0.622523906	0.640980083	0.66131904	0.695829112	0.707611437	0.744779459	0.800966877	0.826162446	0.91408938	0.983227236	0.982915822	1.018582402	0.984379649	0.927887485	0.892865489	0.858278091	0.812713249	0.742583897	0.745936447	0.66137815	0.698730562	0.716381625	0.64167066	0.587894195	0.501910751	0.323939911	0.178520994	-0.013419033	-0.145170588	-0.334497363	-0.442406983	-0.584546857	-0.631309358	-0.636670965	-0.70105336	-0.668234057	-0.690401344	-0.711030072	-0.74403272	-0.801376494	-0.82415237	-0.86577109	-0.920772161	-0.935968484	-0.907149621	-0.87930515
0.084264544	0.197333515	0.405173067	0.578827938	0.653903957	0.548799854	0.413985908	0.335078758	0.490326024	0.715219061	0.792378089	0.788937451	0.770660945	0.638975164	0.643779195	0.650096439	0.61656055	0.665360083	0.742617039	0.76605581	0.849332782	0.681659982	0.517662831	0.238992218	0.413917617	0.609070108	0.663724315	0.632385481	0.416969921	0.236790724	0.083889031	-0.029449922	-0.099404531	-0.232717103	-0.459011927	-0.648317817	-0.680740101	-0.592117019	-0.42631162	-0.312202453	-0.480900948	-0.654027584	-0.808649961	-0.796573726	-0.743726783	-0.646023605	-0.598593704	-0.668136025	-0.688975277	-0.694154209
0.05032116	0.204302053	0.385581717	0.488515896	0.59203681	0.539173852	0.413047396	0.241321559	0.053876776	0.087686261	0.089677652	0.040700079	0.133252161	0.327078726	0.457680647	0.489194114	0.42248869	0.332942605	0.135947476	0.016125741	0.100260679	0.04270132	0.077669749	0.253772697	0.410315299	0.560154344	0.592334963	0.496652424	0.359687989	0.176836026	0.059591052	-0.000400033	-0.039046785	-0.185098922	-0.326605175	-0.511510542	-0.57160913	-0.556543403	-0.443143793	-0.243365414	-0.053624096	-0.061237806	-0.078000997	-0.015903409	-0.151174921	-0.294999028	-0.436725919	-0.50864275	-0.454286902	-0.294687349
0.175729711	0.395261699	0.507688271	0.589581506	0.691462889	0.672767852	0.716676306	0.715731752	0.67994427	0.762098966	0.782123758	0.847625786	0.918675823	0.961680784	1.032370523	1.067140014	0.980435785	0.924226941	0.892173249	0.852173142	0.769162173	0.780140129	0.736521518	0.741777125	0.729222076	0.720425188	0.689192486	0.606056505	0.521216359	0.344301669	0.209416791	0.03452987	-0.154260282	-0.37310722	-0.467959094	-0.59376614	-0.629102325	-0.623827668	-0.675256409	-0.683797567	-0.66670344	-0.725586825	-0.720979261	-0.734963626	-0.842587829	-0.871624979	-0.868845151	-0.900560822	-0.898121163	-0.868016283
0.081411273	0.187250589	0.247007389	0.382743957	0.46802857	0.504481167	0.630991941	0.686438859	0.752490511	0.786488459	0.902802086	0.898083323	0.978150838	0.995800104	1.002961305	0.986190485	1.031078184	0.974222821	0.978735485	0.914592015	0.862182677	0.819207673	0.800483915	0.760575126	1.026745435	0.528622271	0.465651535	0.375533494	0.294148844	0.17629758	0.126818915	0.001187068	-0.106683125	-0.203887414	-0.270096821	-0.374321259	-0.49088779	-0.582954148	-0.667433919	-0.723239189	-0.796775483	-0.801831693	-0.898841996	-0.892529606	-0.961328558	-1.0010558	-1.004288752	-0.993216091	-0.986020979	-0.968708475
-6.477251602	-6.444812293	-1.585058315	15.31325951	18.50567677	39.8973123	13.20630383	34.11894648	27.24920497	19.73202065	12.28098137	24.6762599	27.69781434	4.931860866	-0.443699079	-36.42765588	-11.87234121	-15.86093964	8.576435598	13.16568912	7.277426186	-15.13660389	-5.040228329	16.89869747	15.52161568	42.63038112	10.8214877	-11.26164827	6.824692517	-1.6625843	-13.83687262	-5.352685426	-66.2784363	35.08451652	2.003630711	3.066190201	-27.81654424	-1.953874341	0.151789683	-39.83576967	-2.636679551	-9.229786216	-13.12103231	14.9344548	4.595127255	-6.920518935	-18.09498447	-26.38708871	19.92269959	-3.922447436
0.203784103	0.307876304	0.437853038	0.507341434	0.530589821	0.57392387	0.620567024	0.635010905	0.735772928	0.787892583	0.869263463	0.896490176	0.923924954	0.978694516	0.941138612	0.938189058	0.940144531	0.938937766	0.970724439	0.912045474	0.910023416	0.839134166	0.728812695	0.690035661	0.581724278	0.532425631	0.509742348	0.488683528	0.46066387	0.326889509	0.175437635	0.005625655	-0.206548957	-0.299298883	-0.441261548	-0.499344011	-0.569355409	-0.57785249	-0.58036189	-0.653133615	-0.729339982	-0.771763566	-0.864534097	-0.938916653	-0.960436164	-1.015554335	-0.922781933	-0.886764341	-0.91705061	-0.95136759
0.111629461	0.238285063	0.277276671	0.415437263	0.445370178	0.561029748	0.65103567	0.682986141	0.77456699	0.772877236	0.937979893	0.964966918	0.980762058	0.982839494	0.994017483	1.047260604	0.992579489	1.011559775	0.904373906	0.887969221	0.901150193	0.810737046	0.756988507	0.682381108	0.599808219	0.592228793	0.418104925	0.426557813	0.276268751	0.204208592	0.129820743	-0.060012225	-0.068220217	-0.208388001	-0.280960523	-0.392255758	-0.447093416	-0.548267411	-0.599121425	-0.681605475	-0.782995069	-0.799039855	-0.888508231	-0.960043928	-0.977450658	-0.967208443	-1.033092273	-0.965561994	-1.016044205	-1.006848268
0.113106177	0.15945821	0.283582055	0.377975499	0.472929533	0.542943433	0.649780747	0.690113854	0.765527584	0.821784334	0.869273931	0.915421725	0.966469568	0.950084775	0.998781414	1.01728891	0.992889621	0.962356502	0.966513837	0.930946204	0.863008631	0.843313926	0.736923977	0.708490216	0.648153349	0.530159807	0.486919719	0.394870081	0.283412073	0.198733435	0.093346811	-0.009052274	-0.104799512	-0.193371717	-0.300030848	-0.356467448	-0.464878234	-0.558692264	-0.61630833	-0.70924294	-0.785467298	-0.834426215	-0.880362164	-0.925591308	-0.984321103	-0.960726803	-0.987616349	-1.02397894	-1.023705009	-0.973735801
0.092918872	0.199661577	0.269381715	0.37571125	0.473519216	0.551047712	0.60919588	0.69090327	0.785758858	0.819531139	0.883552279	0.921310908	0.948755593	0.979264008	0.992247553	1.004433559	0.997062124	0.983823295	0.961210656	0.918968407	0.890446591	0.844724237	0.748485895	0.720675689	0.650020179	0.548695416	0.480037231	0.408127221	0.26000783	0.184299212	0.091912035	0.015849568	-0.117598526	-0.201709588	-0.298466818	-0.37291088	-0.471826533	-0.540440882	-0.641922436	-0.715150531	-0.756456918	-0.812405422	-0.89466437	-0.916147332	-0.943349825	-0.994193326	-1.006503506	-0.998516279	-0.961968262	-0.994856921
0.105177408	0.172381885	0.273402126	0.362976522	0.444727012	0.562068588	0.578590121	0.752991319	0.772788274	0.808258875	0.920420799	0.892812331	0.969835674	0.981144149	1.017170881	0.965184736	1.003431216	0.969590579	1.005844067	0.927352304	0.866277124	0.832090873	0.754969367	0.734913479	0.622410051	0.577232149	0.491200868	0.400022227	0.247867211	0.185817334	0.082052436	0.001255089	-0.1145441	-0.185296394	-0.287053527	-0.342678374	-0.45946188	-0.55978529	-0.628947071	-0.691571535	-0.829437486	-0.834198076	-0.871346625	-0.896563145	-0.929922826	-0.992518707	-0.981470255	-1.005307895	-0.982660082	-0.980314454
0.034441616	0.175664031	0.358141246	0.49402469	0.58038436	0.55479449	0.44961819	0.305201493	0.138695925	0.039478026	-0.004617992	0.099567851	0.22696502	0.391129781	0.551300201	0.594201343	0.546398687	0.422449182	0.267890176	0.081361574	0.003879216	0.02214131	0.148541066	0.288225243	0.44231843	0.544468604	0.580208952	0.499055539	0.347518497	0.17583547	0.041186478	0.020601643	-0.040904634	-0.177717998	-0.319686437	-0.479588064	-0.585006136	-0.556492317	-0.465168129	-0.286300965	-0.123717303	-0.020339187	-0.017291582	-0.089544256	-0.231832314	-0.389606318	-0.537017771	-0.601516339	-0.549679498	-0.407249419
0.121960902	0.140571427	0.24852013	0.431521006	0.521746601	0.61868343	0.665088922	0.71323067	0.785755718	0.826548058	0.899355303	0.97159414	1.024443854	1.013144303	0.976342006	1.044356478	1.018514121	1.025109054	0.951197624	1.016409532	0.934198654	0.922347818	0.77148536	0.735055651	0.654399924	0.590410955	0.478264353	0.402282378	0.305905386	0.200865202	0.093601969	0.053864585	-0.156085757	-0.27995712	-0.309738778	-0.405419445	-0.455706417	-0.630647812	-0.679398316	-0.789669844	-0.788308486	-0.897269378	-0.963932217	-0.972095662	-1.032332836	-1.103425885	-1.058044024	-1.140680691	-1.036179746	-1.030374621
0.09360345	0.187637362	0.282647086	0.378697709	0.464341997	0.554064162	0.611767278	0.750704312	0.805595417	0.832310731	0.86510439	0.956376661	0.978084334	1.000608846	1.007086094	1.009571651	1.012631914	1.008218916	0.968615349	0.951594572	0.907978365	0.824032474	0.76806752	0.709639413	0.612968616	0.535478002	0.426035338	0.367854505	0.265705203	0.214168666	0.080739511	0.046208284	-0.116979328	-0.205111935	-0.293190325	-0.383038626	-0.486280162	-0.559475565	-0.617012391	-0.761318821	-0.776173787	-0.828145315	-0.829805018	-0.966026142	-0.993923081	-0.967930246	-1.019022704	-0.979585972	-1.022631089	-1.00267253
0.077248349	0.144790689	0.28301545	0.371588827	0.47366517	0.515932558	0.633989086	0.718787782	0.773935741	0.810245894	0.891181544	0.883808704	0.951951713	0.963546036	1.002029949	0.974856707	1.015293352	0.995889574	0.951438633	0.908010105	0.883526212	0.845244077	0.758370879	0.707734126	0.604783484	0.530534039	0.499140026	0.374921963	0.27809239	0.174689274	0.13864479	-0.018892979	-0.085128396	-0.213472627	-0.26745801	-0.374118189	-0.419999613	-0.57900621	-0.626642789	-0.698833204	-0.740375836	-0.833961797	-0.890500551	-0.909459147	-0.938465584	-0.966533593	-1.00413237	-1.02941229	-0.99441549	-0.995885463
0.144230572	0.225927215	0.294873488	0.421624867	0.431379751	0.575980841	0.638125973	0.675376474	0.715034908	0.793385172	0.855908313	0.932705044	0.958770092	1.009967738	1.03462978	0.980001665	0.96290144	0.980543181	0.945311765	0.92721951	0.889247793	0.85478859	0.760562977	0.71679195	0.812819397	0.516428345	0.453187023	0.369571297	0.334791186	0.20230085	0.080629465	0.018702303	-0.094373034	-0.234306014	-0.263850716	-0.354814034	-0.461094432	-0.527979379	-0.646407545	-0.649867966	-0.789096059	-0.821007433	-0.877877735	-0.947534249	-0.946587785	-1.016026718	-0.974321861	-0.971927556	-0.990482723	-0.987924614
0.05433194	0.155711266	0.301318041	0.449869655	0.532824925	0.530813068	0.468673208	0.331702328	0.210545614	0.119203531	0.140770745	0.223793891	0.364512878	0.505920941	0.618751588	0.687598503	0.614377116	0.513097478	0.329022551	0.213077602	0.107673167	0.134947471	0.213843934	0.348635328	0.484897492	0.53114455	0.543261825	0.455045139	0.307255066	0.168847093	0.059797644	-0.014119626	-0.034852237	-0.157092155	-0.314662579	-0.457676051	-0.564481152	-0.550656997	-0.444381646	-0.360591916	-0.212261166	-0.140612387	-0.138448355	-0.215890773	-0.339634469	-0.519217387	-0.671823247	-0.663650575	-0.633627396	-0.532147084
0.096532538	0.214785563	0.281337851	0.353035511	0.47258192	0.574339012	0.621295911	0.688269975	0.760928816	0.837016171	0.836121016	0.953176648	1.010239755	1.027564345	1.008413301	1.01177358	0.993244237	0.999482208	0.989613921	0.999801897	0.889450299	0.856994192	0.775116275	0.731194235	0.623565531	0.526111778	0.505329361	0.415226543	0.298230528	0.193850979	0.123252412	-0.011566894	-0.09956026	-0.224296712	-0.319483377	-0.42723441	-0.525003025	-0.558708036	-0.683466589	-0.735365536	-0.824464611	-0.924274805	-0.934330523	-1.012875971	-1.000167543	-1.054069734	-1.084139624	-1.091136737	-1.029647395	-1.054199449
0.088961449	0.174998747	0.317491916	0.385704269	0.464455089	0.543468094	0.630159408	0.71838633	0.774446105	0.809782168	0.859921871	0.942090414	0.948932065	1.007392541	1.001698847	0.995460052	1.016475425	0.941158284	0.929896585	0.929168294	0.881514918	0.816671552	0.764873312	0.69630793	0.644654982	0.544898329	0.470871867	0.397480194	0.292063803	0.200560325	0.087019649	0.000699176	-0.116059237	-0.193733896	-0.287113637	-0.376815554	-0.451049241	-0.537455069	-0.617559202	-0.70884065	-0.750147711	-0.824185993	-0.871610804	-0.915148994	-0.927191144	-0.985145547	-0.983983046	-0.990067839	-1.028012335	-0.988492548
0.267502918	0.477310859	0.634046956	0.676238083	0.702328492	0.606984784	0.57537024	0.599379893	0.679787158	0.757448374	0.877556361	0.887088827	0.91228793	0.925795126	0.861623162	0.84141287	0.886807685	0.874336496	0.925097576	0.964752459	0.864153896	0.759377432	0.65801872	0.598637812	0.568107281	0.632532143	0.605793786	0.662839255	0.670858151	0.448708334	0.24431745	0.004547021	-0.24858896	-0.485955464	-0.625448609	-0.647076744	-0.596855974	-0.578954448	-0.567528693	-0.5822368	-0.664574962	-0.78352713	-0.872025085	-0.948810962	-0.903746078	-0.863231203	-0.855513718	-0.829505085	-0.878864582	-0.883780556
0.096688508	0.179555723	0.273385418	0.372062248	0.481705676	0.499001207	0.625344986	0.682244339	0.809434049	0.804518222	0.896214317	0.912422956	0.922544582	0.98635795	0.998590043	0.952467213	0.962363804	0.960843154	0.973238426	0.907023949	0.896372547	0.808518605	0.785663249	0.695356765	0.637385429	0.542270551	0.485181851	0.34612527	0.30101087	0.202423973	0.093480533	0.026091469	-0.110969188	-0.210613294	-0.304772593	-0.368698857	-0.466050381	-0.545805119	-0.638595827	-0.669838921	-0.775719498	-0.83450718	-0.886623528	-0.937982284	-0.975489553	-0.974746095	-1.000832616	-1.003601506	-1.019540226	-0.995713795
0.113474874	0.159787103	0.244961315	0.401105467	0.463245702	0.536557942	0.682674299	0.695765845	0.810910852	0.825162064	0.873417268	0.962789083	0.970139633	0.961385824	0.99415981	1.050809543	1.008855604	1.037035725	0.961170753	0.906984677	0.87340065	0.810105486	0.750619936	0.6984506	0.464058041	0.57559562	0.493338026	0.382492572	0.302331832	0.237769901	0.140490682	0.023353661	-0.050472893	-0.203301042	-0.304600608	-0.378611405	-0.486485013	-0.602971627	-0.648217469	-0.677382049	-0.773419156	-0.811427627	-0.854217131	-0.971510237	-0.9588724	-1.001021114	-1.02411329	-0.967094298	-0.964172361	-0.959934768
0.069564649	0.216111075	0.446263564	0.69152277	0.715001664	0.636598413	0.452229409	0.408479108	0.546584245	0.828373333	0.914569886	0.983616225	0.82747799	0.777086383	0.772582418	0.805177193	0.789363688	0.719025254	0.829823896	0.999217482	0.967320748	0.721949553	0.575079867	0.402236489	0.468727817	0.601323786	0.710843768	0.69615245	0.428445672	0.254029694	0.075840801	-0.006185369	-0.072468124	-0.261471426	-0.452194634	-0.60133094	-0.729687036	-0.708666318	-0.451984921	-0.394112707	-0.595244326	-0.749594168	-0.89593564	-0.902490234	-0.84530557	-0.783064534	-0.796151101	-0.739710831	-0.728770318	-0.799942437
0.15165206	0.359307954	0.485519732	0.586167512	0.615223761	0.651862594	0.701750251	0.694645145	0.74529855	0.769995368	0.762311908	0.827842958	0.905233279	0.955088204	0.987042235	1.019454203	1.003071408	0.996108213	0.923998314	0.865611412	0.812006979	0.758731994	0.739109605	0.734093236	0.703487097	0.700153553	0.667794862	0.608380497	0.502433533	0.326182471	0.219458461	-0.006567966	-0.147925092	-0.314383556	-0.483167964	-0.54298051	-0.660499014	-0.656372109	-0.619571757	-0.648292834	-0.668104771	-0.667035098	-0.690485765	-0.774858063	-0.843311627	-0.860215124	-0.939517433	-0.958110467	-0.892681314	-0.858689747
0.109205827	0.221998325	0.272020605	0.375195896	0.450802053	0.561952896	0.638621827	0.706028754	0.765085099	0.820688405	0.893281952	0.968158057	0.972548408	0.993084531	1.046828389	1.020168394	1.001608697	1.005496166	0.997301821	0.941673961	0.855089212	0.864962137	0.796758381	0.724630464	0.632590857	0.550491423	0.502203054	0.399423813	0.308366701	0.212417438	0.113243271	-0.030823124	-0.117407207	-0.192553212	-0.345539519	-0.455709214	-0.515566537	-0.570345705	-0.649134915	-0.741390515	-0.803861863	-0.898236589	-0.957012304	-1.004848933	-1.029283105	-1.075051945	-1.058597761	-1.059373697	-1.061402312	-1.102266012
0.098562078	0.181321444	0.310904781	0.374001484	0.475962589	0.547812942	0.644127805	0.733363803	0.784344017	0.828815983	0.881739592	0.938824323	0.928262619	1.00688846	1.050580499	1.019322687	1.011076104	1.002025893	0.99235344	0.941326226	0.928719549	0.850118116	0.832039702	0.74413929	0.660202371	0.600408723	0.477169038	0.411994005	0.331040745	0.197974273	0.139236092	0.004707114	-0.073003721	-0.161063927	-0.287177874	-0.387691976	-0.515192178	-0.591450939	-0.700740508	-0.787219379	-0.836284405	-0.890591052	-0.970246961	-0.991784185	-1.027079506	-1.052380901	-1.081032894	-1.087717267	-1.075282824	-1.073906109
0.077516482	0.186942304	0.306969298	0.38212788	0.485921537	0.567056909	0.708081753	0.741543868	0.744126546	0.799436572	0.855702627	0.871629292	0.95500371	0.973393269	0.991710459	0.996303485	0.954851575	0.957901403	0.922799795	0.939131311	0.875228374	0.827270129	0.74775187	0.724944401	0.998246426	0.5709553	0.457841337	0.370254482	0.240166267	0.187969584	0.094621354	-0.028651673	-0.087442192	-0.154564775	-0.274593779	-0.384632368	-0.46750655	-0.553486833	-0.590674191	-0.678531227	-0.785884579	-0.80535929	-0.875372716	-0.932916266	-0.946718545	-0.992987418	-0.963134254	-0.987110348	-0.969011646	-0.991479182
0.206641209	0.383721038	0.448355402	0.538234169	0.551940842	0.60071966	0.5984491	0.630702591	0.710691309	0.796765518	0.902388027	0.934131063	0.960342753	0.974849598	0.870031564	0.896893236	0.962405894	0.953667095	0.956073065	0.900695615	0.874951887	0.781476771	0.724300484	0.619023979	0.585428354	0.558253171	0.563948422	0.533455226	0.45493666	0.320092597	0.196072322	-0.029901031	-0.161345407	-0.357427402	-0.451287808	-0.526868974	-0.545910838	-0.57143581	-0.611864591	-0.670700133	-0.722178228	-0.76713789	-0.857420542	-0.927264794	-0.896661289	-0.940947171	-0.884609859	-0.891638444	-0.92812623	-0.924774127
0.100041359	0.181615059	0.306173149	0.343824582	0.473468799	0.529235654	0.628715752	0.715727712	0.790544525	0.85134415	0.887654707	0.917936298	0.955964498	0.965326934	0.992055239	1.014358742	0.966211537	0.991784571	0.96438885	0.948935084	0.879761431	0.834177127	0.739391269	0.724290754	0.652326785	0.585339669	0.49148231	0.426664909	0.300128051	0.162350572	0.082959673	-0.007148947	-0.119189662	-0.200095903	-0.259318944	-0.395650171	-0.474475129	-0.535758786	-0.651972626	-0.708987297	-0.776642432	-0.816211859	-0.896176107	-0.900278918	-0.965341095	-0.992343714	-0.994730693	-0.992219031	-1.003810689	-0.991198433
0.221387125	0.298668243	0.444797141	0.496039711	0.546320451	0.58073539	0.588217976	0.64409859	0.722968762	0.803381623	0.884645806	0.955548197	0.939121723	0.917593654	0.925303687	0.926534966	0.922802873	0.945294649	0.934988691	0.878783926	0.89444058	0.808230558	0.714258598	0.657499857	0.613764993	0.581193242	0.578885981	0.532314076	0.461693519	0.359959593	0.186991744	-0.037824773	-0.163395917	-0.331581997	-0.403789042	-0.486373525	-0.554407228	-0.5787463	-0.600190496	-0.695148484	-0.751124292	-0.834873044	-0.877069714	-0.936240669	-0.936317187	-0.959750416	-0.944256711	-0.927434522	-0.925767484	-0.921471902
0.063122757	0.220739577	0.257418718	0.352358627	0.469337402	0.563713855	0.637626002	0.680493541	0.758708997	0.799364511	0.848914665	0.903278861	0.963452137	0.988331121	0.989476619	0.984090726	0.966253229	0.979731128	0.943856004	0.917073179	0.87591885	0.824637137	0.765173294	0.694576933	0.640784925	0.56374137	0.472150745	0.407421446	0.283967708	0.207769115	0.089426872	0.005947304	-0.070664877	-0.176655866	-0.275183535	-0.39157793	-0.477416414	-0.541645559	-0.583606019	-0.717000975	-0.792917228	-0.856430506	-0.873622694	-0.912522337	-0.938920406	-0.991581725	-0.979251186	-1.014890312	-1.01026403	-0.990942824
0.064163912	0.200687964	0.261884572	0.398563832	0.466870727	0.552087188	0.649857838	0.690641518	0.793396999	0.846041357	0.914361719	0.924673591	1.000715964	1.007289587	1.002251692	1.049597408	1.039110535	1.014205743	0.977736077	0.980536961	0.905679347	0.86618217	0.824999508	0.717320125	0.637421046	0.578373457	0.545837623	0.416961181	0.30793781	0.20964475	0.12083853	-0.015047038	-0.09686994	-0.186400995	-0.293838818	-0.420618223	-0.500727352	-0.57947486	-0.69986646	-0.760524817	-0.82975315	-0.874136679	-0.942034222	-0.982333457	-1.036499436	-1.032905812	-1.068709061	-1.076548121	-1.081539106	-1.07521673
0.131082269	0.238304739	0.284886673	0.366508218	0.519168521	0.582777943	0.596673994	0.676946363	0.767991712	0.858038471	0.878489896	0.946812277	0.916699953	0.959908426	1.033582962	0.982241446	1.01434987	0.997053226	0.937047992	0.955868361	0.917097373	0.804954106	0.766199493	0.73569764	0.641140948	0.561875604	0.470155597	0.433710169	0.28894602	0.171072395	0.079031477	-0.011610371	-0.082002872	-0.188502378	-0.290443948	-0.3859124	-0.441105597	-0.593180592	-0.671285516	-0.718972252	-0.758898369	-0.821248906	-0.852273088	-0.893594569	-1.015577737	-1.013850842	-1.044278175	-0.955629113	-0.988367379	-0.990562822
0.101142087	0.266822955	0.49134648	0.702609911	0.744298132	0.685801676	0.50648915	0.452370232	0.643982778	0.896132269	1.002212935	1.023927329	0.965309562	0.886643289	0.898758372	0.892972318	0.890764123	0.906861194	0.948977096	1.005941596	0.9995838	0.903393994	0.653331629	0.449089515	0.507622696	0.700394956	0.75734891	0.686119683	0.49060174	0.250788818	0.073984874	0.013777622	-0.059220384	-0.261812654	-0.504859353	-0.683878742	-0.745863139	-0.676545139	-0.530058307	-0.478169356	-0.657205833	-0.883825841	-1.019990212	-1.001881499	-0.96691285	-0.896231701	-0.899101227	-0.897340615	-0.881125312	-0.881807548
0.10286288	0.187171722	0.282290595	0.374363344	0.484490566	0.531022443	0.676582822	0.724435077	0.76839147	0.844419024	0.889561291	0.908887642	0.942856396	0.944743208	0.981702783	0.998667671	0.981427581	1.00646749	0.959230039	0.917300696	0.861286514	0.816825478	0.773077124	0.729225792	0.640929539	0.547981829	0.466735402	0.384176002	0.296183069	0.195013438	0.128626954	0.025071819	-0.080418659	-0.190084181	-0.274142877	-0.398148987	-0.476463834	-0.548240567	-0.643295963	-0.694134797	-0.755615225	-0.808536261	-0.896301053	-0.90625704	-0.989624657	-0.957953705	-0.995759148	-0.975725949	-0.995698136	-1.007721357
0.033537085	0.190260973	0.365145548	0.524822912	0.550508525	0.497888045	0.297235933	0.06726758	0.193486926	0.355340645	0.425171621	0.384001546	0.224842102	0.075718022	0.091730195	0.122050278	0.091415216	0.010440736	0.233245466	0.355298894	0.426364281	0.361848016	0.192613731	0.070447909	0.309718132	0.489879006	0.555486336	0.536458303	0.351557431	0.191029402	0.053445508	-0.008018819	-0.024748965	-0.196545224	-0.361042333	-0.522695065	-0.539661174	-0.53511485	-0.319992785	-0.045249878	-0.177174766	-0.361394639	-0.412694914	-0.371090632	-0.239261438	-0.028138381	-0.092735403	-0.142716532	-0.083322993	-0.036717575
0.12586796	0.182309018	0.260466851	0.370324153	0.458446134	0.558519382	0.648289797	0.709442068	0.768978311	0.884048575	0.889266039	0.941533133	0.949970533	0.980372952	0.984014327	1.026192387	0.987314616	1.007843239	0.934656814	0.886041348	0.870773267	0.832882265	0.771733632	0.70192971	0.647386598	0.56510608	0.497713467	0.380329796	0.32440963	0.191237348	0.105063313	-0.020548185	-0.112833963	-0.19224829	-0.283978878	-0.36583887	-0.430498601	-0.559351662	-0.643629673	-0.714666052	-0.76125462	-0.795149462	-0.872912417	-0.962218997	-0.936819366	-0.982201824	-1.018846298	-1.024161937	-0.982520722	-0.99354636
0.100663924	0.182031772	0.305142167	0.383168822	0.471175178	0.58642235	0.63720073	0.69164602	0.76127702	0.816173545	0.872633319	0.935296761	0.952280448	1.007389903	0.998872937	0.978366593	0.999427742	0.948081207	0.9583483	0.93756551	0.891601158	0.81466687	0.765162377	0.715792029	0.631121933	0.575848511	0.4553413	0.387445687	0.315208242	0.170674562	0.105460314	0.008505173	-0.067670677	-0.207091888	-0.261057742	-0.369569944	-0.475488577	-0.53397524	-0.589674499	-0.674626398	-0.714984891	-0.825241204	-0.901782912	-0.909690559	-0.933447725	-0.978287545	-0.992328138	-0.988670017	-0.983328159	-0.982210709
0.073181327	0.189602324	0.320533234	0.373307069	0.436220461	0.518421382	0.580490034	0.734572365	0.787121122	0.868046113	0.893078772	0.975216749	0.965700151	1.006478712	1.060217742	1.020629231	1.096138718	1.031853949	0.980288529	0.968284677	0.953977322	0.885873936	0.820242553	0.762990679	0.699964881	0.625001529	0.491632852	0.42101716	0.321034178	0.236772264	0.14790633	0.01653249	-0.106474288	-0.233716633	-0.328508188	-0.417088794	-0.502713195	-0.584167983	-0.65939788	-0.785881428	-0.83574902	-0.878898208	-0.977006052	-1.037713368	-0.987842284	-1.055201606	-1.094830187	-1.09323175	-1.097300117	-1.093123748
0.08428982	0.223304264	0.406980048	0.615131382	0.690890553	0.576926108	0.405667703	0.347107935	0.529971806	0.6902307	0.849960793	0.846078671	0.744355255	0.705026165	0.657924781	0.671113877	0.651484322	0.678863966	0.761591337	0.817710248	0.823436144	0.712673398	0.517456659	0.317657551	0.421868841	0.575036525	0.676264836	0.646129437	0.436198693	0.275224777	0.086564068	-0.014281248	-0.055164076	-0.23114088	-0.440199636	-0.586618704	-0.66729272	-0.600607066	-0.416150181	-0.335796857	-0.485889354	-0.713096576	-0.829881943	-0.831248678	-0.730271389	-0.687472065	-0.690073683	-0.697840059	-0.637772333	-0.715207446
0.107395185	0.21806324	0.295378704	0.347748001	0.474549896	0.517767725	0.613800586	0.672582592	0.796896496	0.832885148	0.893440825	0.928118287	0.985450196	0.992503169	1.028850275	0.952563783	1.004849516	0.984234391	0.970368941	0.948412168	0.880999279	0.805170747	0.792884958	0.733179163	0.844597504	0.574445585	0.458911155	0.401099657	0.276421838	0.212562531	0.126787274	0.014453224	-0.047914314	-0.184707666	-0.31829201	-0.369863504	-0.495017554	-0.595374209	-0.579617036	-0.674108709	-0.783069049	-0.798663959	-0.88305137	-0.918421775	-0.95222007	-0.987020537	-1.030199557	-1.001693528	-0.966788472	-0.990495311
0.10325476	0.178147307	0.285387776	0.355003902	0.470268906	0.555610897	0.630168749	0.678553784	0.792944533	0.859329253	0.858027209	0.910838876	0.986161019	1.002759158	1.014821168	0.991750096	1.004096026	0.961761075	0.97845511	0.909189152	0.846064345	0.855345673	0.777392676	0.74159808	0.458377155	0.560504287	0.479671649	0.414018516	0.293738178	0.225265636	0.094040499	0.015792708	-0.095702146	-0.158164296	-0.299956719	-0.344879299	-0.530930519	-0.525100191	-0.625476814	-0.719211335	-0.736015661	-0.813002107	-0.893663438	-0.871407038	-0.974906681	-0.971247648	-1.013258727	-0.996858308	-0.988851711	-0.950572602
0.096787575	0.207442887	0.358265797	0.38074383	0.507046166	0.560796533	0.603428739	0.692993545	0.780371352	0.900578646	0.877681496	0.930728364	0.943303375	0.973461809	0.975780036	0.986140822	0.989199052	1.026016629	0.951032592	0.900775632	0.902517192	0.830468595	0.768532625	0.661978127	0.63805689	0.547709285	0.479427703	0.398262192	0.274481119	0.203304872	0.140125378	-0.008232552	-0.187948788	-0.189095516	-0.315591287	-0.329790599	-0.425331822	-0.532432269	-0.634731714	-0.67830419	-0.782558667	-0.808641169	-0.881548149	-0.925017909	-0.91262505	-1.037816814	-0.962900234	-1.002849303	-0.987898391	-1.022969749
0.114408682	0.201944409	0.31333642	0.360751538	0.458796993	0.594301154	0.618756765	0.715241887	0.795150564	0.867589556	0.885345247	0.936866603	0.989065412	1.007434353	1.001060204	1.052588556	1.027606873	1.03786281	1.015963271	0.924455598	0.885163667	0.861413663	0.809259023	0.74571297	0.635887254	0.569075695	0.501312076	0.410022476	0.352451403	0.189414781	0.092460436	-0.017460119	-0.098537161	-0.196639034	-0.315932535	-0.41737311	-0.492172501	-0.572692767	-0.726516607	-0.736534147	-0.80796493	-0.907514101	-0.938771423	-0.996258308	-1.061241352	-1.076322152	-1.039894467	-1.096208882	-1.078296976	-1.087656882
0.117834471	0.192025272	0.300024007	0.351812903	0.456552817	0.559407834	0.612080581	0.70402135	0.802096908	0.799167268	0.845170329	0.936276144	0.98059138	0.992826762	1.009686696	1.017924209	0.99543848	0.980299879	0.959555152	0.917209093	0.868676741	0.849959876	0.770445338	0.713323387	0.608515184	0.539655309	0.4886592	0.374502783	0.268741504	0.193763481	0.144799439	-0.043669047	-0.11317312	-0.191877883	-0.264799558	-0.394657658	-0.461365506	-0.54923957	-0.642323011	-0.704051917	-0.791946389	-0.838756752	-0.85617092	-0.891498563	-0.940301943	-0.987357756	-0.995266681	-0.9921202	-0.985267502	-0.95728308
0.104793839	0.183502009	0.294663368	0.385913082	0.451203589	0.57360342	0.64923724	0.715458551	0.797415781	0.845086304	0.904430264	0.941723226	0.972120942	0.984264213	0.968548858	0.974485545	0.979840232	0.971909128	0.951743289	0.943130936	0.87337717	0.823775036	0.778319619	0.703442443	0.64325396	0.566693811	0.456080695	0.358610032	0.297177564	0.186018298	0.115425951	0.015590473	-0.104158559	-0.21962775	-0.302173666	-0.396884247	-0.489954152	-0.597945948	-0.6346324	-0.695031881	-0.774597606	-0.820741536	-0.877035915	-0.900329128	-0.965828077	-0.98191496	-1.026037499	-1.029033914	-0.992065685	-0.988862949
0.013823154	0.092798848	0.119743477	0.262770697	0.314604463	0.391644405	0.443557155	0.485235472	0.522121304	0.604071708	0.64792659	0.718207388	0.851518689	0.894481948	0.957459443	0.963593022	0.979124991	0.919290906	0.799000949	0.71858053	0.672562663	0.594450759	0.512711753	0.492883699	0.453480201	0.3980483	0.367033012	0.221199033	0.154310235	0.073390257	0.002858668	-0.010129087	-0.015688573	-0.080539999	-0.167060404	-0.251324963	-0.335794065	-0.402996389	-0.470207045	-0.45280987	-0.537250376	-0.599590001	-0.650222918	-0.700897282	-0.804010419	-0.894921496	-0.954935214	-0.986959631	-0.959609751	-0.905036093
0.094352336	0.194826268	0.275082902	0.390403699	0.483729703	0.540591726	0.639907459	0.7057987	0.763261644	0.845369921	0.895749346	0.940081624	0.938470651	1.006613052	1.053366871	1.028619029	1.003430909	1.011535237	0.988452671	0.939702983	0.977898161	0.879204949	0.836120847	0.719104774	0.678812385	0.580787718	0.513051313	0.416042281	0.300110888	0.22047703	0.09010645	0.019741434	-0.128899128	-0.244215839	-0.333016255	-0.364039343	-0.483390021	-0.587730986	-0.669272039	-0.753132651	-0.829998648	-0.892026656	-0.975901319	-1.018972358	-1.031990532	-1.044947225	-1.076447693	-1.07314933	-1.079426285	-1.041818709
0.061657675	0.176349559	0.29692331	0.369186007	0.447698142	0.576990871	0.667435391	0.692335369	0.799366081	0.866436028	0.896053601	0.949442186	0.940210389	1.024909102	1.072577916	1.07714196	1.022091629	1.024596923	0.971655034	0.980787085	0.913317247	0.879144713	0.819383697	0.739437371	0.659647719	0.574249662	0.462007027	0.382064635	0.262690321	0.178636343	0.123793758	-0.04550397	-0.106485492	-0.196291199	-0.291391385	-0.395636807	-0.48302259	-0.576714074	-0.6846198	-0.773696466	-0.812687401	-0.86623816	-0.960756107	-0.981075862	-0.994056043	-1.0785078	-1.032215086	-1.066124441	-1.083795304	-1.041481301
0.02259233	0.09065146	0.156759331	0.250667511	0.345287035	0.398759561	0.462826814	0.45219296	0.511757809	0.574305791	0.625388491	0.72684275	0.823821742	0.875716315	0.927814478	0.965982434	0.994397224	0.904133178	0.811995697	0.691366396	0.638125422	0.564693813	0.529829876	0.476845241	0.425229816	0.393066283	0.32424691	0.260134957	0.15962533	0.085262085	0.023528041	-0.016600831	-0.031755919	-0.053409495	-0.163691897	-0.252957419	-0.338229764	-0.433572345	-0.452621613	-0.484317221	-0.508302858	-0.557828849	-0.622605	-0.714501536	-0.786463891	-0.873252416	-0.956091883	-0.984148464	-0.959343323	-0.912141199
3.967173807	-5.035788018	-0.472453354	0.405649798	-1.43214708	5.599225774	-0.945033424	-6.149342085	-1.312890408	0.532850045	-2.618638532	-2.163392689	-1.646833475	2.097526535	3.541265422	-1.161937251	-0.386798394	2.412885235	6.128515494	5.69005023	-3.204875181	-6.082567552	-2.291179482	-1.151821832	4.538754562	6.476275839	-1.44576285	2.989615648	-2.485253741	-3.865181443	-3.842091925	-3.077654263	-5.321100741	0.331769499	4.238432864	-6.440718493	-1.499850387	1.889929872	-4.413859617	-8.42804259	-3.126841413	-0.7462787	-0.398704731	3.404734695	-4.035200253	6.683879361	-3.411445667	-1.279019319	6.327176348	-7.031149712
0.073650142	0.205988464	0.421407885	0.624512301	0.656838297	0.544486584	0.349293675	0.225564453	0.474412711	0.698755091	0.785030927	0.753849873	0.631863112	0.585943147	0.55026804	0.541696224	0.55393123	0.547867156	0.664253108	0.771671061	0.820610207	0.658552644	0.467829668	0.313751113	0.359522681	0.598768025	0.654852666	0.588149025	0.387538163	0.192480505	0.04385881	0.011883162	-0.065403417	-0.211358389	-0.390125537	-0.549451155	-0.631753532	-0.567753106	-0.41000052	-0.296295773	-0.427937068	-0.63249775	-0.750460659	-0.758602164	-0.651344554	-0.544649306	-0.525060712	-0.588926944	-0.551903893	-0.594022097
0.110133781	0.196339409	0.286984287	0.376456526	0.448360007	0.523949379	0.697974262	0.730490369	0.757802465	0.817638587	0.869945494	0.885004566	0.976331282	1.001226873	0.956616651	0.989742898	0.994188251	0.984370721	0.947378046	0.928648542	0.843748927	0.800670112	0.777085952	0.709501572	0.691256414	0.564523963	0.482753018	0.384344875	0.30719569	0.164936136	0.095173352	-0.008943187	-0.071587259	-0.206180553	-0.27013209	-0.354338523	-0.485817861	-0.5580855	-0.590051505	-0.677671285	-0.736918491	-0.818658881	-0.883714032	-0.947362867	-0.942526135	-0.988626631	-1.032659055	-0.914756774	-1.036895442	-0.963803249
0.156371162	0.182546633	0.307055036	0.388522662	0.460233864	0.559930447	0.645478067	0.671301081	0.770676199	0.825142006	0.880127529	0.941731318	0.937715097	1.023644649	1.02115704	1.036979549	1.002234777	0.941371173	0.976993824	0.937108032	0.869508867	0.840118393	0.75213199	0.726540046	0.598897221	0.591299412	0.462875613	0.361775541	0.303846489	0.208819905	0.141177017	-0.002433049	-0.10878912	-0.191995313	-0.273850384	-0.401379158	-0.454930433	-0.54394433	-0.596994425	-0.723434323	-0.75907422	-0.842604592	-0.871912387	-0.942004939	-0.957820642	-1.032906397	-0.965828788	-0.994387564	-1.004896875	-0.967613357
0.107462723	0.216683383	0.32061433	0.402081282	0.499907664	0.566933784	0.638368767	0.768180784	0.755244453	0.801767112	0.890322711	0.946818582	0.985920297	1.062628849	1.015294532	1.049187379	1.029091344	1.000582736	0.930294005	1.027980924	0.956016318	0.880951819	0.800044421	0.711777262	0.636656029	0.551875458	0.460409725	0.359168306	0.319619311	0.199662902	0.148017908	0.052135297	-0.111930268	-0.21612676	-0.363485812	-0.443104205	-0.475760739	-0.538457445	-0.633043723	-0.727176481	-0.813711813	-0.876163006	-0.959710831	-1.013931548	-1.04194655	-1.046133788	-1.04015884	-1.124919174	-1.096222304	-1.041876905
0.106018282	0.219306806	0.287256176	0.369012387	0.508594215	0.577584497	0.63645704	0.694440283	0.759791519	0.817192852	0.845108266	0.928707549	0.960820162	0.978329931	0.998672738	1.007769256	0.984023737	0.955576838	0.945275145	0.919216667	0.876861835	0.82612555	0.77343991	0.70477727	0.633003811	0.527443702	0.503579278	0.404168781	0.266876897	0.222231157	0.152463887	0.025151731	-0.073341724	-0.171767694	-0.304195109	-0.355569744	-0.490672971	-0.521134673	-0.576648205	-0.722346229	-0.742560061	-0.820579095	-0.914979056	-0.920283092	-0.975469524	-0.962762117	-0.971537491	-0.948761796	-1.01793311	-1.005205813
0.211164641	0.39486044	0.518543178	0.557958533	0.584030331	0.601933743	0.645251222	0.634185839	0.681720789	0.785633019	0.902140622	0.919749851	0.936229494	0.935753833	0.925910946	0.879653603	0.926833252	0.936719679	0.960914718	0.93599797	0.875140512	0.773616608	0.719612302	0.655083048	0.604221739	0.555043398	0.595986854	0.53653048	0.485991554	0.391621447	0.242152584	0.012354609	-0.196174208	-0.389281178	-0.490664972	-0.557636949	-0.577408089	-0.585686742	-0.579902558	-0.681990786	-0.709586713	-0.822528557	-0.88162737	-0.932059591	-0.914001949	-0.942842571	-0.881534369	-0.920211354	-0.913948743	-0.945317754
0.103778913	0.30886188	0.287053828	0.322777605	0.357349581	0.529672692	0.681790803	0.743939999	0.890457217	0.817186149	0.755972066	0.963663927	0.974729565	0.926327144	1.061218314	0.950266928	0.881320972	0.870098497	0.936393393	1.03738937	0.779997023	0.771978151	0.676051975	0.6482394	0.686668021	0.640253244	0.490111235	0.532167987	0.474004918	0.209508126	0.244498139	0.02938871	-0.215504759	-0.144843178	-0.355971906	-0.32637508	-0.484869889	-0.655591051	-0.700167924	-0.804114315	-0.846934946	-0.900858386	-0.904297176	-0.803207437	-0.881809499	-0.871220251	-0.899460691	-0.98185092	-1.013174875	-1.057790484
0.076160805	0.184973704	0.246388224	0.389705985	0.501502696	0.550935629	0.661426114	0.738335387	0.762165383	0.843560411	0.895436834	0.95606561	1.004554526	1.004376767	1.032542978	1.022138939	1.009494366	1.049892654	1.034440696	0.910195896	0.895755711	0.86499836	0.792686947	0.721937461	0.701166512	0.576031336	0.516411189	0.398714352	0.298691367	0.237161314	0.088296767	-0.036693929	-0.099397987	-0.205282871	-0.309369705	-0.440134668	-0.50775655	-0.60758685	-0.691945025	-0.744192945	-0.836270677	-0.897225552	-0.986636255	-0.9823153	-1.029886484	-1.053245997	-1.092184571	-1.070949871	-1.076015006	-1.077322798
0.054417881	0.270752717	0.494906495	0.697202266	0.793689524	0.711181169	0.515152827	0.470943959	0.654819011	0.925856102	1.037720291	1.05169764	0.975932452	0.943617404	0.926771488	0.942916456	0.921106386	0.947843664	1.001796524	1.055509158	1.038787794	0.891040252	0.650563718	0.4533309	0.519661265	0.666304118	0.780934457	0.679587078	0.49215515	0.240934663	0.10742162	0.002314591	-0.042245759	-0.249511207	-0.496145198	-0.718807646	-0.755912327	-0.693611815	-0.517170737	-0.437139086	-0.648496068	-0.892042089	-1.044329497	-1.088141019	-0.990486241	-0.954176767	-0.942261608	-0.967370905	-0.919121597	-0.938887221
0.245980429	0.452134699	0.557025434	0.634059785	0.599790832	0.564143011	0.594546728	0.617447629	0.682580551	0.822199367	0.889751531	0.92821727	0.928434371	0.876888519	0.902568922	0.889939421	0.843618374	0.897649132	0.903434791	0.916808195	0.89557113	0.751431879	0.638343966	0.626660308	0.578019244	0.594467525	0.594618898	0.616294728	0.576274579	0.462388794	0.268628999	-0.013473146	-0.244390987	-0.494455729	-0.576286805	-0.619840759	-0.595047946	-0.551677317	-0.532762342	-0.589695717	-0.689427889	-0.805766091	-0.895702199	-0.911472773	-0.949238017	-0.961105022	-0.900226346	-0.880278055	-0.890282706	-0.929798739
0.145637016	0.112445657	0.208395273	0.348299323	0.489814995	0.558852806	0.638428295	0.714039477	0.835148952	0.881576218	0.913448286	0.902963954	1.020599122	1.024093706	0.988153096	1.056894865	1.020133603	0.977464425	1.019973047	1.016652609	0.950677551	0.860878417	0.829962677	0.752574702	0.674080886	0.63153469	0.534845273	0.427626374	0.278514381	0.157868488	0.114409024	-0.081019091	-0.040069882	-0.189564911	-0.298980473	-0.415164908	-0.519968547	-0.588600515	-0.655705943	-0.80277842	-0.75597497	-0.873269541	-0.893518783	-0.983978524	-1.038720154	-1.089276842	-1.073221944	-1.112925875	-1.081955266	-1.051833406
0.091812492	0.200992075	0.319079222	0.371141125	0.491062672	0.558496243	0.699339365	0.717116034	0.75386249	0.871173946	0.924410954	0.940282404	1.015407316	1.01184926	0.989162387	0.997987025	1.029520644	1.032479374	0.96833973	0.945254399	0.924737391	0.822674379	0.787819597	0.744367602	0.666935271	0.617524317	0.482764301	0.393836518	0.284958401	0.244752494	0.13247309	-0.026059346	-0.13462694	-0.198595366	-0.305049814	-0.390948136	-0.528169066	-0.597692955	-0.651073675	-0.742655674	-0.791898173	-0.878373995	-0.924684364	-1.019364515	-1.004701734	-1.026596983	-1.020934937	-1.111349238	-1.127554865	-1.085259804
0.058033764	0.170568295	0.327901312	0.500044573	0.574873879	0.561601138	0.457503988	0.299900218	0.131554649	0.018068937	0.004607426	0.096823319	0.234401355	0.403425939	0.537017232	0.593173356	0.553717207	0.425768021	0.239938912	0.08218259	0.015275156	0.02696183	0.132499742	0.294398812	0.430874012	0.537402384	0.58956839	0.480903751	0.347058485	0.171924244	0.071811232	0.011759808	-0.045239136	-0.170975592	-0.356379161	-0.484884659	-0.557980344	-0.550312584	-0.460213202	-0.291357784	-0.137159135	-0.04422698	-0.015525942	-0.086808892	-0.222744628	-0.386944921	-0.520350014	-0.563714499	-0.527911422	-0.397377058
0.04865511	0.28901884	0.48461809	0.69119583	0.690117934	0.57202591	0.443803535	0.41948665	0.550297412	0.81812505	0.898278708	0.937259083	0.83592842	0.722518249	0.704550419	0.74883018	0.724378715	0.772799131	0.798054586	0.884221806	0.907505268	0.802293846	0.542570553	0.360959585	0.490452804	0.622458001	0.709328387	0.661839179	0.464981399	0.275540891	0.035005437	-0.066759662	-0.04890205	-0.199221206	-0.412383415	-0.558506761	-0.731161237	-0.62256534	-0.488789557	-0.351533806	-0.578753698	-0.783890607	-0.921600686	-0.959221298	-0.870456159	-0.763297038	-0.750352886	-0.742068087	-0.739935852	-0.782973844
0.083390438	0.27479775	0.479056476	0.683502092	0.773200011	0.683236038	0.524294851	0.433242228	0.67063504	0.890494008	0.978062656	1.011383593	0.938594288	0.912062188	0.876715967	0.8888032	0.854922233	0.889305942	0.932305285	0.994544414	1.016450802	0.874045421	0.651962355	0.435652529	0.490140414	0.686153413	0.731988193	0.707201515	0.492293873	0.268218478	0.046036112	-0.005927921	-0.080628078	-0.260713293	-0.485515766	-0.661150967	-0.742912919	-0.696410585	-0.506808487	-0.447644841	-0.653497449	-0.860981914	-0.980611232	-1.000711334	-0.948995447	-0.860441183	-0.893950079	-0.851666312	-0.864103058	-0.909474533
0.210389677	0.365580085	0.48321917	0.538471037	0.567734824	0.598700553	0.599919661	0.670241993	0.723168734	0.810381565	0.858998289	0.91262075	0.931185018	0.913741233	0.916208365	0.892570628	0.931436674	0.948846124	0.93890099	0.890775985	0.886379097	0.782683462	0.706890443	0.653879835	0.650068443	0.55847568	0.580076953	0.5706077	0.44885724	0.369386287	0.182451468	0.013388064	-0.248719245	-0.39829424	-0.458373722	-0.516566962	-0.57878977	-0.572170541	-0.591935002	-0.625988861	-0.71795543	-0.818708496	-0.85313046	-0.969851435	-0.937325123	-0.943720921	-0.929700129	-0.901430129	-0.950986297	-0.999779631
0.148638426	0.157424441	0.236463804	0.338331659	0.461663491	0.544966898	0.633227963	0.687474297	0.765660509	0.843156133	0.845614667	0.922132289	0.908632184	1.016116675	1.050324569	0.9534122	1.001536011	0.998979256	0.974543941	0.946572714	0.901492753	0.85158977	0.759944923	0.753292253	0.678922533	0.601962278	0.436854122	0.386104938	0.252700528	0.118882711	0.098487696	0.013858372	-0.15178729	-0.133914691	-0.295261538	-0.382464427	-0.498810417	-0.584496678	-0.65481298	-0.747190047	-0.786227546	-0.852895572	-0.861982519	-0.944851479	-0.988184953	-0.980058281	-0.972443939	-1.017682121	-1.028702357	-0.97149545
0.100377973	0.194469159	0.272982009	0.396470907	0.481606032	0.569353868	0.632982951	0.712925446	0.754953849	0.8270647	0.908295759	0.945415259	0.971306644	0.97751196	0.993638341	0.986687191	0.986516376	0.997744563	0.96043335	0.922720406	0.893961162	0.829468817	0.796648903	0.702840977	0.651105232	0.545887298	0.476221812	0.357031613	0.312995366	0.212223002	0.090045213	-0.00362134	-0.123224003	-0.168569582	-0.30584657	-0.37477139	-0.475896857	-0.539107955	-0.657577225	-0.721493906	-0.766280942	-0.854292305	-0.85700898	-0.920462356	-0.949672991	-0.968837635	-0.991853378	-0.988743853	-0.977065478	-0.98035001
0.077447916	0.245414605	0.475544066	0.647730999	0.707811381	0.610056656	0.460857833	0.360303154	0.57421572	0.782166783	0.883188463	0.901178056	0.80609015	0.737869115	0.732691047	0.714602146	0.704826903	0.738474322	0.800880693	0.872138135	0.872510254	0.790181818	0.540613415	0.357472232	0.422724259	0.62897141	0.722884206	0.6333202	0.47758996	0.246167045	0.081234373	-0.005346118	-0.046869337	-0.227908319	-0.448367932	-0.627306654	-0.692867075	-0.622339446	-0.450791337	-0.378014244	-0.547484277	-0.729853483	-0.877662376	-0.87902829	-0.824742615	-0.726195237	-0.761693694	-0.760268497	-0.715234629	-0.735726587
0.071570657	0.185056992	0.377508314	0.521719005	0.597904267	0.538701067	0.408930921	0.195229394	-0.007238044	0.146724145	0.186386285	0.11519068	0.031851543	0.213682492	0.358412105	0.396223631	0.371488278	0.20943711	0.036707547	0.089248868	0.18601082	0.147562149	0.008082975	0.209125354	0.40290483	0.539030366	0.587027852	0.517683446	0.374637374	0.204337197	0.050421879	-0.006455402	-0.050017254	-0.195480137	-0.365914148	-0.517880432	-0.594784985	-0.53167183	-0.396301492	-0.202376537	-0.009375507	-0.121553819	-0.188008968	-0.123556076	-0.027917104	-0.214291058	-0.352201493	-0.388856136	-0.346653934	-0.211621866
0.21456407	0.338476825	0.475765927	0.568580284	0.645462842	0.62340509	0.67262969	0.720251205	0.733164243	0.727749262	0.79189933	0.879170695	0.925206047	0.96960698	0.996200215	1.026912091	0.991144794	1.001160816	0.899552196	0.816941506	0.811864264	0.743043976	0.726033762	0.724360128	0.732025443	0.670458706	0.710955263	0.58778313	0.475086137	0.342287152	0.155948816	-0.020022916	-0.165447293	-0.333145686	-0.413349314	-0.556495274	-0.603895241	-0.628288929	-0.664979172	-0.671334788	-0.664249101	-0.707999469	-0.713622351	-0.745073607	-0.788895512	-0.859014082	-0.894466731	-0.919148747	-0.89347516	-0.88463624
0.161978772	0.265589944	0.319252886	0.377319918	0.431326028	0.539955681	0.638543845	0.686163714	0.785292175	0.813233991	0.873172237	0.89896333	0.951699477	0.978596564	1.007226378	1.021371928	0.968829231	0.96561413	0.951006978	0.952804611	0.89011619	0.865758635	0.802135763	0.694858605	0.625161347	0.571476972	0.464246327	0.363137219	0.275057571	0.175798443	0.06776565	-0.000369895	-0.131697587	-0.211696443	-0.289657284	-0.402517737	-0.462250054	-0.545543236	-0.610186563	-0.658715301	-0.76291747	-0.850175408	-0.879605187	-0.958665302	-0.955978121	-1.025734091	-0.984985798	-1.00687519	-0.96897131	-0.997634871
0.095779844	0.206809426	0.264448661	0.386884413	0.453747187	0.560220115	0.644839484	0.69590963	0.734092246	0.881744423	0.885989779	0.895852903	0.947426715	1.001367113	0.994943448	0.959066665	0.946667458	0.992597845	0.986655294	0.923487893	0.855489951	0.834228513	0.749528781	0.702771771	1.06189273	0.595023169	0.462597841	0.384133236	0.336128776	0.182182256	0.118773648	0.018539376	-0.133054141	-0.226469562	-0.267178222	-0.394664323	-0.461175993	-0.547592363	-0.641742319	-0.671953273	-0.768118403	-0.84286048	-0.928389112	-0.974744382	-1.004421672	-0.966807514	-0.97412572	-1.022459291	-0.994222808	-0.953366781
0.174255812	0.417336292	0.502248489	0.56597109	0.524020738	0.600910954	0.603787767	0.65888102	0.663592253	0.802267147	0.8859471	0.920601974	0.951399727	0.934909864	0.925485445	0.881242062	0.923489193	0.934614138	0.992089127	0.911522462	0.861120098	0.836130887	0.705694915	0.638734784	0.591600624	0.579982871	0.591464758	0.559044432	0.55484184	0.388561815	0.211742917	0.011068032	-0.261454259	-0.392754905	-0.500594033	-0.588230809	-0.580959966	-0.578764399	-0.625054001	-0.63470368	-0.713710016	-0.7566686	-0.895983066	-0.931310958	-0.96803365	-0.918647005	-0.922736585	-0.844909638	-0.918254679	-0.903506228
0.058979858	0.197408842	0.299699025	0.380241844	0.438071326	0.605530918	0.655268606	0.713857656	0.794553002	0.826826478	0.846556175	0.926620292	0.953236245	0.978493364	1.014451755	1.004177113	0.997023316	0.961120402	0.974391237	0.945861749	0.900393464	0.828535	0.795676699	0.737098486	0.610218588	0.56336377	0.465366166	0.365373082	0.284011871	0.236763949	0.078562189	-0.017064822	-0.083808583	-0.163872802	-0.310639049	-0.351757415	-0.45245772	-0.546548068	-0.605575343	-0.701055243	-0.793335525	-0.833724764	-0.870987763	-0.892624261	-0.91730044	-0.978663955	-1.013992626	-0.975697396	-0.979528007	-1.018417216
0.099484045	0.244238148	0.266867183	0.355297317	0.469537513	0.5131615	0.630697765	0.73376821	0.763710915	0.834384901	0.929998312	0.967911531	0.977577655	1.00976671	1.032686041	1.040724048	1.034659179	1.041340428	1.012255019	0.957827377	0.931444594	0.865099636	0.806729329	0.755140461	0.637832554	0.597185691	0.457225094	0.39284616	0.309292075	0.208463812	0.111489782	-0.012633176	-0.103410094	-0.178972998	-0.299220737	-0.385156554	-0.497943257	-0.583967803	-0.686759874	-0.761177071	-0.781962743	-0.910273362	-0.95752079	-0.98659187	-1.05424118	-1.05854084	-1.048732781	-1.085182489	-1.071170799	-1.090404068
0.071597821	0.156507907	0.300006487	0.376561718	0.473787432	0.605633393	0.623030266	0.709619934	0.784328794	0.82778485	0.868502244	0.91434737	0.914292575	1.025955104	1.012278581	1.003318263	0.973474581	0.975021596	0.948635411	0.925655359	0.930242057	0.845922073	0.805289521	0.701227466	0.620530689	0.531316752	0.468149899	0.381964493	0.306966482	0.188793452	0.067107021	0.015582847	-0.067017194	-0.216746223	-0.286470046	-0.393266834	-0.46631211	-0.598963416	-0.651737295	-0.708148613	-0.749280383	-0.815792339	-0.855756906	-0.926733209	-0.976106374	-0.9516231	-0.967274982	-0.975191161	-0.988467035	-0.966457838
0.086876167	0.192393733	0.273520283	0.3932365	0.470329794	0.544419279	0.639318123	0.676454063	0.78491754	0.806119857	0.882174909	0.925445903	0.942387175	0.96790944	1.001960997	1.02723362	0.98242032	0.992067263	0.968226881	0.912419701	0.855620736	0.839824676	0.818512216	0.745227895	0.361658465	0.550639192	0.459768493	0.350997448	0.297038626	0.187757397	0.089406881	-0.007116783	-0.093989124	-0.229053002	-0.267017543	-0.403526343	-0.43563745	-0.557571344	-0.621610925	-0.711328117	-0.793456247	-0.820668862	-0.833538008	-0.895210432	-0.933940093	-1.014976048	-0.996173647	-0.980554093	-0.99412073	-0.966868964
0.035347246	0.111039979	0.241782813	0.360540702	0.444159397	0.490977848	0.484494897	0.431585111	0.417748162	0.379869432	0.428273628	0.487098156	0.611512235	0.738852599	0.857473523	0.875077246	0.846792486	0.727769288	0.620889548	0.516921665	0.424583236	0.386810123	0.415457378	0.425621505	0.467905496	0.499990567	0.433346607	0.371943666	0.242862624	0.10928576	0.052786574	-0.01261939	-0.049629438	-0.151502694	-0.243055786	-0.364615639	-0.447440364	-0.480712666	-0.486730327	-0.43719576	-0.388777774	-0.377192798	-0.415973974	-0.509438455	-0.618989641	-0.768534758	-0.836499535	-0.864012277	-0.837267916	-0.803138181
0.213871346	0.351575129	0.572504091	0.615675008	0.678012031	0.72977725	0.686956947	0.702471033	0.715640386	0.743891984	0.746742275	0.800291631	0.870731021	0.936605298	0.990831156	0.995665925	1.015127508	0.898029341	0.872927397	0.822648848	0.740182242	0.72401379	0.669744891	0.710215116	0.726053032	0.767637102	0.740946824	0.597558486	0.584825905	0.411964458	0.179964333	0.001157696	-0.195952869	-0.399890257	-0.578268433	-0.60501957	-0.713366426	-0.671430534	-0.675131807	-0.655528844	-0.619225298	-0.648849533	-0.701676271	-0.711056392	-0.835179635	-0.843462354	-0.929256243	-0.877677647	-0.883947638	-0.837767949
0.100630401	0.224888063	0.259893263	0.388645563	0.483725115	0.528683556	0.611327137	0.702906769	0.770757675	0.833662489	0.908233055	0.960866939	0.968361613	0.990398543	1.011936916	0.962094298	1.041214411	0.960508313	0.969591126	0.939143023	0.92467909	0.803188298	0.76450478	0.708904078	0.645268615	0.563411988	0.436788647	0.394253396	0.265755066	0.148932256	0.101532954	-0.028858289	-0.08098806	-0.189511784	-0.278067708	-0.380582359	-0.459338333	-0.556538476	-0.633011532	-0.680232446	-0.762911544	-0.801368043	-0.896315516	-0.93446313	-0.930287194	-0.949639579	-0.992796801	-1.009000617	-1.001600344	-1.000542481
0.0354419	0.048284101	0.151652808	0.237326288	0.353424256	0.393154972	0.423452454	0.489936836	0.558013951	0.590330008	0.678286055	0.750552724	0.825169893	0.932191281	0.985849814	0.97217649	0.976604175	0.890197656	0.809652041	0.757529381	0.658722249	0.58459769	0.517638906	0.53781114	0.445012922	0.371506836	0.31712183	0.268185811	0.182734727	0.052524917	0.058164415	-0.006648318	-0.016065805	-0.087455919	-0.16239991	-0.238418336	-0.354253175	-0.36614204	-0.443557835	-0.488394194	-0.532794792	-0.626655622	-0.672351968	-0.751321148	-0.833033636	-0.921485218	-0.975857257	-0.989934619	-1.003676184	-0.908837841
0.133632077	0.178541812	0.303847486	0.358001002	0.486236262	0.50140647	0.678573972	0.760711171	0.798950583	0.850330134	0.866812262	0.948293083	0.926688186	0.974909497	0.97969251	0.990311653	0.9879441	1.005068063	0.916479666	0.957424496	0.859517685	0.831154084	0.805128575	0.708956561	0.939916743	0.534864355	0.499264576	0.4201602	0.326108874	0.201438573	0.082701963	-0.011108909	-0.139850237	-0.196879645	-0.25675573	-0.334750413	-0.442585107	-0.589417685	-0.649199593	-0.712741671	-0.821007238	-0.818354427	-0.883012193	-0.918742205	-0.946607417	-0.958045804	-0.986072741	-1.015908883	-0.979323207	-0.953362455
0.107615481	0.193118114	0.276864893	0.374253917	0.448019246	0.529606225	0.655917892	0.697362787	0.748327673	0.87103885	0.857395121	0.939794567	0.973086406	0.996718966	1.016852671	1.020846005	1.006840124	0.98195722	1.017400524	0.93720362	0.882497227	0.847001179	0.778022864	0.720274426	0.667125399	0.576209916	0.516264316	0.422365087	0.356866266	0.176698972	0.089478508	0.033131183	-0.110134297	-0.184952783	-0.287758187	-0.418525141	-0.509294252	-0.548742714	-0.685927375	-0.760316422	-0.844126274	-0.903736413	-0.92052815	-0.999530995	-1.098047016	-1.057325641	-1.100637821	-1.08224601	-1.105787689	-1.076995516
0.103844273	0.186687949	0.287694549	0.367589923	0.460753886	0.601572433	0.624189088	0.714757965	0.757816714	0.861655462	0.865726943	0.930677665	0.95612353	0.939222898	0.966398784	1.033648833	1.000341156	0.987810812	0.941200852	0.95689348	0.911726024	0.832077715	0.759473064	0.6845782	0.656395951	0.599814467	0.481676523	0.350191937	0.338045886	0.192205019	0.112979448	0.005457534	-0.066269482	-0.186063593	-0.282304294	-0.412028366	-0.480817032	-0.53909744	-0.68976619	-0.703065315	-0.74465881	-0.789383253	-0.893089502	-0.907792221	-0.956409548	-0.971631217	-0.993913709	-0.992249599	-1.044200108	-0.93610598
8.480156288	-3.737632677	-19.50791423	-3.63804681	2.885566673	7.782911527	-0.057996514	5.586306674	-12.18400157	-7.339496606	11.29675472	26.83767349	-4.539951982	26.40382307	-2.196548257	-8.408084866	9.915304267	6.786615989	-9.796186065	4.578179505	-5.039336827	-17.13241978	2.716243151	4.847261588	15.52730665	1.851491903	13.29753919	8.325517919	-1.789526802	0.48342228	-20.45330917	-7.691707536	-13.25800889	-20.07559133	-7.730254418	-12.97975918	3.911494365	-12.92825035	4.895542463	3.780615778	-11.00510247	-21.35837768	20.1866638	1.88267699	-4.893616433	-22.42311482	-4.992288186	13.50601346	-23.40332808	14.55165269
0.086116922	0.184989672	0.243150421	0.379439772	0.459029605	0.546948744	0.637879695	0.681875775	0.76158683	0.82859909	0.866498027	0.935197638	0.969315595	1.007312465	0.990660693	1.016020188	0.998260311	0.942959609	0.992895055	0.895977898	0.884944154	0.819090776	0.758999919	0.73552078	1.043952607	0.597638941	0.487039443	0.353445877	0.305655064	0.208391561	0.140442268	0.019425766	-0.113166929	-0.119693261	-0.28965014	-0.409156746	-0.500522836	-0.531913734	-0.58990655	-0.695928772	-0.781931133	-0.814228963	-0.865078966	-0.929803229	-0.962392511	-0.973106081	-1.010102178	-0.96862118	-0.9795617	-0.979317426
0.077881169	0.218323235	0.308830473	0.360680108	0.498024531	0.541810183	0.667092055	0.722835783	0.781012265	0.896510308	0.893529289	0.925094332	0.976200642	1.016764996	1.022443383	1.040207772	1.041653688	0.992427212	1.019646732	0.951332054	0.906196049	0.838455579	0.811729888	0.720293444	0.642256489	0.562698276	0.512369497	0.408861532	0.272660388	0.232190369	0.102269394	0.037044282	-0.110440107	-0.208763043	-0.293740241	-0.434444782	-0.526064292	-0.625997073	-0.701336174	-0.722770818	-0.801604996	-0.864191147	-0.940480956	-0.988800203	-1.077471649	-1.092175273	-1.050906756	-1.076755173	-1.065955562	-1.084105908
0.107529479	0.189473328	0.288448718	0.419784156	0.439825237	0.550040661	0.637146341	0.727410652	0.782769497	0.845561073	0.872905276	0.933150643	0.928797827	0.96567744	1.00977321	1.008037315	1.019301434	0.952789949	0.945444153	0.90749803	0.844458899	0.872593369	0.809531928	0.725052912	0.657968319	0.561107948	0.428238825	0.414279923	0.297132281	0.187693886	0.087747501	0.01107527	-0.057804974	-0.178234676	-0.257519048	-0.395017669	-0.471233763	-0.505798175	-0.624347637	-0.652691768	-0.782303524	-0.876041738	-0.884210095	-0.897884802	-0.914061645	-0.982075711	-0.996828771	-1.008632632	-0.969419128	-0.949283968
0.116030978	0.182465241	0.277847893	0.371937864	0.481589063	0.566959923	0.64113668	0.700084271	0.764376323	0.855282934	0.837836039	0.950505751	0.956201108	1.014420363	0.990305121	1.0456225	1.0364526	1.007843213	1.010701522	0.948227246	0.935094064	0.860358728	0.796300741	0.73147386	0.705891237	0.610325782	0.484321934	0.426517358	0.295208028	0.194015965	0.068572913	-0.008921767	-0.100902398	-0.227878068	-0.323032918	-0.407335445	-0.493426602	-0.593859079	-0.677814916	-0.751802456	-0.837992957	-0.911254489	-0.98969714	-0.98235803	-1.065035725	-1.050886843	-1.074450186	-1.117727307	-1.111112261	-1.080452339
0.104018721	0.219345653	0.256071123	0.4174228	0.49179998	0.540614863	0.654988645	0.692111409	0.760472913	0.834901079	0.875420675	0.896073302	0.986623206	0.983544348	1.017508605	1.019976432	1.022152026	1.017276957	0.982208668	0.951030256	0.874012819	0.856903297	0.786741019	0.726486875	0.671561836	0.551721224	0.505309088	0.429914699	0.29045192	0.178593348	0.134443331	-0.017589555	-0.076182185	-0.184688566	-0.289569835	-0.393660813	-0.503312152	-0.596733239	-0.672117013	-0.774034166	-0.771498216	-0.892187825	-0.960848631	-1.008355493	-1.041327379	-1.000541648	-1.070914094	-1.075381939	-1.107122079	-1.063726734
0.121364469	0.185290942	0.284251399	0.378368403	0.4289326	0.558603881	0.66243757	0.696667209	0.754850727	0.821048803	0.903999331	0.887396272	0.985811867	1.019742131	1.002938177	1.021392626	0.949048063	0.9516036	0.963992856	0.925936436	0.892474726	0.865227987	0.783943444	0.68373753	0.60874569	0.559833787	0.445051921	0.356803938	0.274220072	0.211268481	0.096682312	0.001220828	-0.103017797	-0.230498261	-0.316582406	-0.375565436	-0.514905742	-0.580082781	-0.619588336	-0.724493731	-0.783987664	-0.806718131	-0.886058767	-0.918891745	-0.967711266	-0.928467378	-0.972457837	-1.026812264	-0.998044763	-0.951265407
0.130488073	0.17607119	0.296410962	0.386087555	0.440370977	0.536452473	0.621660403	0.719616024	0.754052891	0.817573964	0.883285393	0.931921466	0.975943304	0.973080764	0.992352653	1.004984232	0.963056593	0.956435245	0.972131243	0.930511692	0.895179737	0.828096547	0.763961459	0.71555766	0.644138134	0.560393679	0.462352958	0.376880172	0.2763623	0.183570722	0.087566262	-0.007608158	-0.100659613	-0.184386466	-0.303938557	-0.389408514	-0.470058451	-0.537982757	-0.641472621	-0.704917116	-0.765618323	-0.83641685	-0.857579858	-0.932103356	-0.989702769	-0.964882084	-1.038546028	-0.991534742	-1.012557503	-1.001505377
0.132703271	0.177366806	0.280411637	0.365521178	0.485581073	0.550835814	0.646333195	0.768287762	0.754858839	0.815038601	0.897189128	0.91991455	0.947164136	1.058165444	1.038155327	0.996714267	1.050310914	1.028609923	1.016164469	0.942370338	0.929997378	0.882194906	0.780822102	0.764707267	0.678295866	0.597377155	0.542050544	0.392748286	0.321679818	0.183912184	0.107714038	0.024689855	-0.091062887	-0.203360446	-0.271255574	-0.448858552	-0.573978863	-0.589449014	-0.695866306	-0.733220859	-0.846485674	-0.85467865	-0.981797139	-0.939080431	-1.03154476	-1.077888532	-1.124040139	-1.14804308	-1.087500457	-1.060909609
0.08257114	0.160104775	0.277338742	0.415088459	0.475762575	0.544584046	0.639748764	0.684594949	0.759898088	0.810632182	0.915318334	0.888600734	0.952888158	0.988276446	1.029149638	0.999184506	0.997465675	0.955640625	0.936587027	0.902354168	0.857882333	0.801565031	0.787261664	0.67001434	0.419405343	0.574046547	0.463460065	0.356250287	0.335637445	0.196164261	0.100181168	0.01242853	-0.110414779	-0.147730094	-0.28803769	-0.401209691	-0.435684585	-0.538425323	-0.611857786	-0.688607643	-0.752814299	-0.806704736	-0.887678213	-0.894732676	-0.921878111	-0.993834054	-1.012121088	-0.989044776	-1.014094039	-0.980792717
0.102409851	0.20187627	0.281518264	0.361694257	0.452729512	0.568239632	0.622355691	0.729380811	0.749549682	0.832233468	0.866517728	0.929185606	0.961274768	0.995499979	1.007281803	0.986381911	1.018072703	0.987294954	0.91974303	0.912832681	0.871682785	0.845566713	0.77028599	0.709021623	0.61277925	0.56480718	0.485345359	0.375886142	0.2940017	0.211495031	0.101181369	-0.006374813	-0.091274156	-0.188150366	-0.273863795	-0.376775091	-0.45167063	-0.554656176	-0.617537418	-0.670375796	-0.765590876	-0.81880959	-0.884365915	-0.946059225	-0.952858285	-0.992203266	-0.98034745	-1.013211482	-1.00543574	-0.954436482
0.070724882	0.257652983	0.396693272	0.602738987	0.59739738	0.533299093	0.372380046	0.267631827	0.413845084	0.649583606	0.762786458	0.695718245	0.628663879	0.562777065	0.504841851	0.53328317	0.527220872	0.544185617	0.628055396	0.716644462	0.70621005	0.653559486	0.509619414	0.249269731	0.351205768	0.586706698	0.608905736	0.582519948	0.426511802	0.217586455	0.083683917	-0.061060196	-0.062250383	-0.226311952	-0.421544935	-0.55649564	-0.635063929	-0.54354815	-0.349505022	-0.225690742	-0.466792567	-0.63920591	-0.729985892	-0.741810601	-0.6450366	-0.569609604	-0.530572959	-0.544565465	-0.490055236	-0.52503913
0.088026941	0.192866534	0.294350596	0.389530606	0.449466593	0.558359881	0.644034131	0.70323972	0.777225584	0.835440615	0.894612025	0.932395939	0.946826357	0.991514113	0.995070507	1.000358546	1.021175662	0.955508698	0.970830369	0.93127551	0.895375203	0.813209555	0.766236605	0.702812562	0.637568925	0.563098939	0.465860333	0.373960928	0.289114505	0.191800715	0.089319092	-0.016126975	-0.072350952	-0.196683582	-0.287851947	-0.406346997	-0.461316345	-0.565942566	-0.656728241	-0.725855262	-0.75762278	-0.815183358	-0.873215125	-0.922433505	-0.959232614	-0.993790745	-0.979038808	-0.993670038	-0.998044718	-0.945215822
0.121443234	0.180732987	0.267030546	0.353415571	0.472307645	0.543096376	0.626117058	0.683869893	0.788358698	0.838221884	0.85819953	0.935868738	0.953540483	0.981850597	1.018220753	1.021621412	0.986888046	0.994484395	0.987214933	0.941966963	0.873964607	0.825763533	0.763252903	0.712930292	0.623292957	0.559349164	0.479455221	0.395912832	0.260514603	0.175471937	0.089854767	-0.017166462	-0.086818754	-0.183612047	-0.311114679	-0.387417329	-0.493550952	-0.548137449	-0.642959464	-0.693517975	-0.78671416	-0.820744994	-0.894487665	-0.932622214	-0.948499638	-0.967855517	-1.034592632	-1.013001073	-0.992451506	-0.955481455
0.124876652	0.168950763	0.304625523	0.350840703	0.477010824	0.521941064	0.624858416	0.703981745	0.758368736	0.824868183	0.894398043	0.887519449	0.961392359	0.975649833	0.972907927	0.998459705	0.99556258	0.968861996	0.986447113	0.921226555	0.901085953	0.811132869	0.789370255	0.682437343	1.094334536	0.542736773	0.464333253	0.400525321	0.285977108	0.166949734	0.080949758	0.001094724	-0.066447686	-0.195661777	-0.291262884	-0.379423563	-0.421287547	-0.506093094	-0.607652318	-0.687588267	-0.797725303	-0.811800673	-0.904569483	-0.928302438	-0.952230901	-0.96445444	-0.986644913	-0.962320835	-0.996120524	-0.992818592
0.083885501	0.207908186	0.300846472	0.390226634	0.482084918	0.555633916	0.673140492	0.694266924	0.808030594	0.822977737	0.893638121	0.931908883	0.967588902	0.966598385	1.016264077	0.980901765	0.978018169	0.962498891	0.968957397	0.944713784	0.901708264	0.84863887	0.787252647	0.716392766	0.662256908	0.56441627	0.478329481	0.397776992	0.306668148	0.204086516	0.099515091	-0.017276778	-0.079900789	-0.168075738	-0.286144313	-0.366011964	-0.475150314	-0.53420604	-0.631703213	-0.687374752	-0.75842349	-0.827088916	-0.853243326	-0.924319775	-0.933803196	-0.968899945	-1.003549286	-1.008785907	-1.007188287	-0.982498877
0.213507869	0.443768004	0.558480108	0.624867728	0.599110249	0.590045276	0.580577026	0.595576344	0.694763984	0.774216145	0.910654912	0.888068004	0.922965022	0.89704136	0.902551273	0.875173061	0.901206945	0.910232971	0.944113662	0.918951034	0.873765229	0.813112671	0.704487639	0.587255634	0.542167791	0.565252572	0.595897772	0.601120868	0.587612909	0.443132231	0.250803079	-0.00395136	-0.264803552	-0.467220056	-0.56604395	-0.583183011	-0.561485515	-0.637316249	-0.600844406	-0.61559833	-0.694727202	-0.823535788	-0.869057426	-0.915891811	-0.932568457	-0.904237808	-0.870079278	-0.884740711	-0.831571687	-0.910409378
0.073038521	0.189819082	0.363696952	0.501746696	0.580367734	0.528700194	0.347909461	0.130912554	0.096644215	0.27621707	0.334464691	0.279307864	0.120168669	0.045827913	0.185060263	0.24988841	0.189401928	0.055091304	0.127614828	0.259400158	0.317426763	0.264672393	0.113847696	0.108274087	0.350898356	0.525288251	0.576619296	0.503577602	0.372045859	0.214174406	0.046166621	-0.009757738	-0.058288054	-0.178662716	-0.387988976	-0.508009292	-0.582406484	-0.52499571	-0.360445621	-0.120597509	-0.099415596	-0.288266933	-0.324182125	-0.26937735	-0.130322793	-0.055659826	-0.181976107	-0.234258897	-0.173811729	-0.054043703
0.096833249	0.190679682	0.284175543	0.33139222	0.474410377	0.56274161	0.625049744	0.706681009	0.770166276	0.831743792	0.832330482	0.931496618	0.975056862	1.002910267	0.978311563	0.991994131	1.01320711	0.988889884	0.915418177	0.887282855	0.896115297	0.864978054	0.784563246	0.713074777	0.449899587	0.584357164	0.475211166	0.393217971	0.266118664	0.17207622	0.062735307	0.035483118	-0.090242805	-0.202600648	-0.297417155	-0.377243067	-0.477623734	-0.590865205	-0.625085268	-0.716520804	-0.798571361	-0.842749746	-0.886732722	-0.9220568	-0.945246241	-0.984487354	-0.995343646	-0.943638391	-1.022407429	-0.961120586
0.135413665	0.20848692	0.291631016	0.404295226	0.474985316	0.555664123	0.650888219	0.757877424	0.720473126	0.804099171	0.853464037	0.89042273	0.965065215	1.04378602	1.039171229	1.07383545	1.028289191	1.050992401	0.997322797	0.983445189	0.915121827	0.854540725	0.79083999	0.770706778	0.681777778	0.59382187	0.451783802	0.329017687	0.283562114	0.204724648	0.099077833	0.043778458	-0.058277821	-0.22182597	-0.264077416	-0.41468016	-0.480215852	-0.617638801	-0.720361381	-0.733372722	-0.819240304	-0.86598798	-0.907378798	-1.017516152	-0.984403457	-1.064213458	-1.164357643	-1.015780619	-1.090825402	-1.07744579
0.058270567	0.184723225	0.377612583	0.51573769	0.594624735	0.542153356	0.38838039	0.156621513	0.067065296	0.21465344	0.273748349	0.20202979	0.075904326	0.09439693	0.262920477	0.326287923	0.248356869	0.115489592	0.063109892	0.208072279	0.252958633	0.227641189	0.086717088	0.159260646	0.375593856	0.521965984	0.573735576	0.519727477	0.371694311	0.192388206	0.041770333	0.001530174	-0.051922485	-0.192210864	-0.373408143	-0.528410187	-0.59170622	-0.547929287	-0.378394191	-0.161451832	-0.056810015	-0.211578343	-0.273994045	-0.223124921	-0.062874306	-0.108876933	-0.261404518	-0.32113947	-0.270973584	-0.133988422
0.100292722	0.205451947	0.280333726	0.369333391	0.452254608	0.585188585	0.61332856	0.691177557	0.809656657	0.826335567	0.904919446	0.923500791	0.924824223	1.012550955	1.008689093	1.008893039	1.021389904	1.006872128	0.960681204	0.930089062	0.864921353	0.844266103	0.778721681	0.698899476	0.187445872	0.594657226	0.456095529	0.350589067	0.277393327	0.176240141	0.087907519	0.008332744	-0.078258988	-0.179592553	-0.298904238	-0.367433403	-0.508051504	-0.554399411	-0.614123298	-0.709850097	-0.73675804	-0.848129195	-0.906795903	-0.898539059	-0.951704344	-0.974788836	-0.99202185	-0.978817665	-1.009182509	-0.970167733
0.062622981	0.230601934	0.292979122	0.408476504	0.488970261	0.54593008	0.631430016	0.720548412	0.791100773	0.775745283	0.88852847	0.875105549	0.914944477	1.001974418	1.011333	1.040728566	1.005075058	1.017794807	0.944245959	0.957233159	0.865344196	0.89305099	0.751847763	0.715646866	0.63064893	0.525776999	0.50247254	0.421224235	0.343036028	0.19964378	0.088669434	-0.086525183	-0.090678106	-0.134898468	-0.291257736	-0.377305319	-0.520871919	-0.52208436	-0.620501323	-0.73643176	-0.780376834	-0.756267675	-0.859957356	-0.91136097	-0.937573312	-1.008382903	-0.958411972	-0.992897111	-0.935568235	-0.970854103
0.156734062	0.188701452	0.298586065	0.404978198	0.463254414	0.541080458	0.607128783	0.699829869	0.750798386	0.849692445	0.883895615	0.883631002	0.921031103	1.000106231	1.017829602	0.999476168	0.998356743	1.009370819	0.957978883	0.959221044	0.922652879	0.819534561	0.776054163	0.722199302	0.633417925	0.550579988	0.436657716	0.381974659	0.302782284	0.21388699	0.051285847	-0.014238614	-0.097077871	-0.170505269	-0.292347789	-0.349873307	-0.429448269	-0.532805914	-0.634065996	-0.733582654	-0.761026094	-0.842159954	-0.892975878	-0.912833805	-0.947228718	-0.991841194	-0.969840039	-0.953283174	-0.99757417	-0.9929281
0.134368762	0.213831995	0.217088034	0.380392702	0.497885783	0.544851293	0.627909388	0.731522677	0.72870448	0.835142682	0.8945334	0.889086893	0.946416247	1.007592944	1.047334265	0.990484325	1.018227069	0.997517173	1.004727372	0.921025255	0.91744357	0.831298282	0.7830207	0.729921578	0.668742995	0.608180155	0.484197132	0.371935797	0.284877494	0.172422519	0.105533608	-0.026083466	-0.106886603	-0.201383327	-0.283840669	-0.404468705	-0.521125934	-0.591620595	-0.641138699	-0.7635246	-0.845596681	-0.886902163	-0.929598314	-0.960825787	-1.052856633	-1.082481076	-1.028503218	-1.068225362	-1.091201915	-1.076386007
0.076884609	0.168310971	0.3040668	0.468498715	0.499028218	0.524386467	0.654305583	0.682951725	0.793824698	0.843722033	0.916889445	0.953074442	1.008565861	1.021967697	1.04603739	0.992537456	1.064001532	1.051832474	0.938505526	1.006052944	0.924013484	0.857899356	0.789526626	0.808216358	0.656990625	0.581949564	0.492675384	0.396206245	0.298708454	0.172036635	0.165622602	0.028794745	-0.051503808	-0.233742441	-0.313655714	-0.413566867	-0.474556463	-0.620298523	-0.646715194	-0.787206778	-0.786834206	-0.896033373	-0.993341487	-0.928547897	-1.007934429	-1.02584281	-1.034983511	-1.084037636	-1.106737181	-1.138072631
0.098158646	0.218124789	0.298154312	0.387831359	0.452147898	0.570915913	0.612247795	0.681478121	0.789264744	0.853794194	0.853739975	0.919242815	0.991254689	0.979692242	1.004689614	0.988389395	1.035627513	0.96312576	0.956261428	0.911948802	0.848457489	0.814862322	0.785783436	0.681450702	0.624337041	0.544399664	0.46588286	0.395284382	0.285439031	0.184939777	0.094255607	0.066533235	-0.054495308	-0.194018711	-0.294710882	-0.336990278	-0.444431036	-0.543391616	-0.65424042	-0.684758367	-0.777914907	-0.853065728	-0.886157395	-0.921336291	-0.931165536	-1.020719596	-0.998750493	-0.967383037	-1.019358499	-0.964595662
0.113136672	0.219386761	0.27757203	0.396552328	0.484642465	0.543101158	0.654102955	0.721802061	0.780409582	0.83798026	0.911192313	0.94248132	0.996687128	1.000444033	1.051565251	1.005599485	1.015999679	1.006259688	1.002305191	0.941220082	0.908628127	0.883459026	0.802251866	0.725502428	0.680573719	0.566686857	0.489668876	0.412376559	0.317887904	0.195351394	0.109969785	-0.009625725	-0.10592052	-0.209125834	-0.342168742	-0.391366183	-0.536975692	-0.575629226	-0.672457301	-0.727951374	-0.848378131	-0.893793481	-0.95912968	-0.983964873	-1.037630844	-1.061432518	-1.079968278	-1.073582371	-1.057229663	-1.09827344
0.038332352	0.162333426	0.313625269	0.421173615	0.516256227	0.497602985	0.475381951	0.358066801	0.278614018	0.179535043	0.208808064	0.311323379	0.437831934	0.58190885	0.720977416	0.752952113	0.715860455	0.59822166	0.42961295	0.311473119	0.214945468	0.213983005	0.277267421	0.365086577	0.471955829	0.540370164	0.508572183	0.4476575	0.295520431	0.156454588	0.037700086	0.013732871	-0.057322153	-0.136537147	-0.27555321	-0.417059562	-0.524480839	-0.513251353	-0.475766046	-0.384814183	-0.270570761	-0.186875758	-0.217930545	-0.3004706	-0.392258548	-0.567499674	-0.707726675	-0.750174056	-0.703440368	-0.590601648
0.027272522	0.197784444	0.29743261	0.362492221	0.458118982	0.522596591	0.623622125	0.711723194	0.801223032	0.810372431	0.908385918	0.920289095	0.996787172	0.979528377	0.981883276	1.025768271	0.995516073	0.973156654	0.920504585	0.939746135	0.859484537	0.81294718	0.76701396	0.693120853	0.390032737	0.550064744	0.439645018	0.363019705	0.329662601	0.21637532	0.040431014	0.006328746	-0.108170288	-0.192688308	-0.280098176	-0.428878963	-0.45583847	-0.550424676	-0.631231504	-0.695470046	-0.757432241	-0.814329455	-0.913948641	-0.9275886	-0.948509387	-1.001667526	-0.995093514	-0.988557057	-0.96358117	-0.96888984
0.266858269	0.39181919	0.576692092	0.609061825	0.598702323	0.593062786	0.544208609	0.61063076	0.650988414	0.785535297	0.879297495	0.925148779	0.952705076	0.895285669	0.8604188	0.882943084	0.86181035	0.893596337	0.933012403	0.926956997	0.841174986	0.840893584	0.65284976	0.62514486	0.536194321	0.553516646	0.629379735	0.641513402	0.607002036	0.468566299	0.252564919	0.027045798	-0.269958919	-0.468460698	-0.553844258	-0.634724215	-0.648421952	-0.587583245	-0.577300936	-0.638899166	-0.66447474	-0.816604836	-0.874136121	-0.916058625	-0.951383143	-0.855368637	-0.893887601	-0.904060143	-0.892803587	-0.898702243
0.037097904	0.239571479	0.495421477	0.668357458	0.716540637	0.672540404	0.491150478	0.405576512	0.614109765	0.823283241	0.982940505	0.97970496	0.90521241	0.872553235	0.850225897	0.85532195	0.795715011	0.861826608	0.907879642	0.955429499	0.958205483	0.865753059	0.598657234	0.434308119	0.476500253	0.655585828	0.73308605	0.696341358	0.467093759	0.239659493	0.078556499	-0.000205126	-0.061572829	-0.256496834	-0.456698992	-0.659688201	-0.740008327	-0.639995083	-0.49323342	-0.40481554	-0.632074343	-0.843309592	-0.964868468	-0.993731209	-0.930454383	-0.865898791	-0.835150577	-0.83691162	-0.85495123	-0.844591923
0.098922048	0.191172622	0.291648159	0.404017084	0.477419779	0.49625417	0.661589075	0.752476849	0.771619937	0.826524355	0.878145355	0.903827744	0.953432684	0.969220099	1.000810195	1.01567432	1.000971257	0.941688685	0.946381343	0.939777808	0.906791358	0.79681708	0.76835179	0.720256136	0.66332215	0.534846706	0.503977186	0.40998459	0.268695481	0.234810472	0.100606386	-0.001875953	-0.089651998	-0.188525502	-0.287450851	-0.402652666	-0.462389088	-0.544227876	-0.628398741	-0.734096503	-0.776653367	-0.856384592	-0.868630036	-0.917107639	-0.958116919	-0.958386311	-1.00301069	-1.034897465	-0.995040433	-1.00465759
0.077007234	0.169947961	0.284704748	0.394020843	0.479594116	0.549021832	0.667269504	0.703324274	0.748073029	0.807492507	0.891352963	0.92642534	0.955424572	0.954233545	0.989101638	0.994214578	1.002857323	0.992291582	0.959210886	0.943513913	0.881715707	0.817397117	0.775370856	0.712849627	0.632996686	0.530854789	0.475068377	0.387840813	0.304852302	0.178954074	0.088072723	-0.013949698	-0.096509376	-0.168818955	-0.277862626	-0.393756023	-0.494890939	-0.555384155	-0.632196686	-0.697342053	-0.774109365	-0.810828351	-0.883737232	-0.913579857	-0.994515013	-0.983924441	-0.992083066	-0.989697289	-1.004145372	-0.983414125
0.101956458	0.190482023	0.308459489	0.380275041	0.476905394	0.581296462	0.542617452	0.627388114	0.770510393	0.841163009	0.871763368	0.912935808	0.992813314	0.983708126	0.984965257	0.974732063	0.988050061	0.9482743	1.058436169	0.94218791	0.862957093	0.833938325	0.781342677	0.676803	0.616954951	0.548399034	0.468846836	0.38943662	0.301643138	0.20215997	0.129072959	0.017852677	-0.067829165	-0.191148188	-0.256152612	-0.40245645	-0.492194851	-0.522221886	-0.647314971	-0.705769038	-0.825421338	-0.853065464	-0.880451761	-0.946876174	-0.988086311	-0.959282733	-0.981025515	-1.037913005	-0.96818932	-1.020541474
15.02226404	-7.293831858	2.687888913	6.044847074	5.769511175	7.816798256	4.325712661	1.7075183	4.872844749	-6.385280819	-10.65147713	6.528884748	5.684690763	-16.12678481	3.348639551	-4.123585398	1.409663955	-9.574772323	-8.970050518	11.07797148	7.333203549	1.25748287	8.248640572	-0.022091896	-0.396551717	4.053908698	-1.108109878	-1.491925877	-7.102470497	-8.298582249	0.855946634	2.364398357	2.355704632	6.112743905	-0.313730156	-2.614966068	-14.45760918	4.10303434	-6.990325684	4.927974096	-4.601199873	4.433465705	10.36389138	-4.984106208	-1.60986648	-6.024538173	7.676789662	1.959138244	5.643746251	14.67813415
0.251984047	0.434018236	0.580578957	0.677696123	0.718935522	0.766797804	0.760208581	0.711078722	0.692499087	0.683226272	0.702196331	0.801713295	0.864755073	0.927183381	0.964068694	0.992566457	0.956551143	0.930186862	0.880050288	0.785737016	0.745896395	0.67973586	0.700972429	0.694022466	0.720768611	0.714387955	0.772912029	0.691026341	0.584296071	0.418927214	0.28384151	0.006101291	-0.193523703	-0.447084447	-0.592997285	-0.681269538	-0.740001156	-0.67934937	-0.678798763	-0.663062468	-0.595196233	-0.622980272	-0.631900757	-0.7269854	-0.764981427	-0.827594079	-0.852597575	-0.888816934	-0.874049692	-0.828003102
0.048755082	0.195798567	0.377703491	0.532641557	0.592025254	0.51976782	0.377077769	0.147016021	0.09087725	0.235865996	0.293963741	0.256419783	0.095621911	0.090674442	0.203473979	0.267783126	0.224768009	0.115555478	0.089175361	0.266523738	0.310303637	0.266074336	0.097361979	0.137870704	0.36758848	0.535829841	0.57129022	0.515642738	0.375770016	0.202320702	0.061851842	0.017974815	-0.046133124	-0.176404162	-0.365219821	-0.529497644	-0.59377182	-0.504743339	-0.336575402	-0.154305684	-0.082056478	-0.243773832	-0.29612367	-0.234275221	-0.074389154	-0.082992942	-0.221024278	-0.253287142	-0.221037512	-0.080701794
0.064240848	0.211643115	0.367607631	0.535738097	0.572648783	0.559514315	0.434553104	0.246242864	0.068691481	0.043041506	0.068614395	0.009914152	0.15364854	0.325858504	0.447664277	0.522929314	0.46834878	0.321541838	0.152640835	0.025953849	0.094816573	0.024286174	0.056751488	0.253699592	0.441461191	0.556184736	0.558451983	0.524629529	0.322319026	0.189529053	0.042044296	-0.028846507	-0.045622942	-0.198912862	-0.366690992	-0.486852412	-0.561898552	-0.549260061	-0.4314841	-0.261074932	-0.080824382	-0.050587749	-0.062960302	0.004171944	-0.14028029	-0.292171952	-0.44647363	-0.500119367	-0.460422155	-0.333736901
0.0609608	0.201605107	0.29737969	0.360398388	0.479292779	0.520208563	0.649676433	0.750992169	0.795274338	0.843133006	0.881381289	0.924688319	1.015739304	1.037700843	1.021334033	1.053486533	1.029104434	0.998417978	1.006443621	1.012735111	0.918379881	0.896166179	0.793134332	0.725701969	0.696996765	0.61665764	0.475780227	0.422150779	0.288898928	0.246441333	0.105253885	-0.002720633	-0.135843633	-0.189328437	-0.33524238	-0.428794981	-0.541919044	-0.606369612	-0.676383727	-0.773660886	-0.884574731	-0.907977495	-0.993886118	-0.979234637	-1.106535631	-1.06067611	-1.129772177	-1.094897364	-1.074319683	-1.092196605
0.149738827	0.34225473	0.454304078	0.576067192	0.614295077	0.677080045	0.689553119	0.755093214	0.708234405	0.758831051	0.805732417	0.842371875	0.969486678	0.950858412	0.979839089	1.056094942	0.993217162	0.989003423	0.895999876	0.894570197	0.857826686	0.756620584	0.773516169	0.736827725	0.713459849	0.694904338	0.663873534	0.557777666	0.469172239	0.292098887	0.159350327	0.005236828	-0.145428723	-0.364587573	-0.46506355	-0.545922378	-0.629756848	-0.635826574	-0.666449671	-0.653395194	-0.688849698	-0.693374237	-0.693829781	-0.806870177	-0.85143837	-0.853339791	-0.875048052	-0.912984676	-0.885969977	-0.849092134
0.1077115	0.167995091	0.292682668	0.358157438	0.525063228	0.534328159	0.648538939	0.70779513	0.766304104	0.820250717	0.879907275	0.943848148	0.967700547	0.983889262	0.997107793	1.018216231	0.953083893	0.977938282	0.947325289	0.930108191	0.903226989	0.820064003	0.799529755	0.671090648	0.603215538	0.577548249	0.465563522	0.366863569	0.266609705	0.159102923	0.129164446	-0.019847506	-0.071734753	-0.192824734	-0.302131833	-0.37123965	-0.47063556	-0.561082802	-0.648872641	-0.691790073	-0.775176883	-0.814504464	-0.875427879	-0.885206055	-0.943654999	-1.001822019	-0.982790392	-1.019540725	-0.989126664	-0.988529941
0.081615173	0.226682515	0.388749537	0.553830646	0.616260674	0.513912352	0.376709354	0.25247141	0.419199483	0.621286586	0.710915312	0.708176482	0.582882726	0.538672413	0.476072277	0.456528743	0.474436536	0.511623576	0.58931	0.702809506	0.716797274	0.619786598	0.436902528	0.174897504	0.327967032	0.553634703	0.620229221	0.578908798	0.404395903	0.207289288	0.066757247	-0.000195515	-0.040085151	-0.210595598	-0.394562086	-0.566192584	-0.577046835	-0.515975001	-0.329055596	-0.219503665	-0.390365991	-0.64708312	-0.660301705	-0.67336313	-0.569461728	-0.456616081	-0.470735233	-0.44020625	-0.427212905	-0.493944521
0.098975121	0.233089811	0.256101631	0.435532679	0.483909688	0.57907239	0.645613352	0.731820339	0.754242594	0.817080142	0.91234414	0.923320324	0.960843499	0.973558579	0.96188653	1.021428516	1.003330506	0.994445999	0.94948904	0.943019886	0.847813271	0.858720096	0.774766576	0.720094567	0.661498372	0.54890713	0.479981605	0.385423717	0.238003411	0.198316745	0.07787023	0.029026228	-0.052531131	-0.202767795	-0.320080307	-0.386081665	-0.497168834	-0.507292571	-0.610809549	-0.720207487	-0.799791752	-0.875982391	-0.913582437	-0.950562251	-0.950064181	-1.018006143	-0.99359318	-0.989201975	-0.921999478	-0.970806969
0.145021585	0.244784361	0.259522617	0.372088017	0.494887121	0.563535407	0.601851096	0.712876675	0.799847305	0.844663763	0.908103463	0.92914241	0.980081772	0.971021295	1.05432254	1.03360195	1.011071781	1.053059053	0.97107623	0.984647637	0.928177621	0.859033134	0.842737518	0.757086103	0.672103632	0.494510892	0.59142696	0.413331157	0.265500973	0.174551117	0.09820448	-0.027165096	-0.119651196	-0.21388327	-0.273889971	-0.433868227	-0.464998531	-0.66084991	-0.676956815	-0.752795774	-0.826612973	-0.834883495	-0.864275887	-0.958441959	-1.023377655	-1.052695455	-1.070317953	-1.048377947	-1.028722941	-1.074391628
-13.01952596	-12.85450146	19.57774895	5.965511956	10.56953	9.343741498	-2.520228187	2.379142474	20.50406904	15.37300217	-0.195530305	-7.670879191	-1.863374775	-8.8756264	-11.61488527	-9.719664573	-32.89992792	1.717079346	0.901976927	21.79145547	0.186558414	11.43154808	1.421546991	6.380308497	-0.951150601	8.731438029	3.585961626	-3.73064078	0.632122822	0.530458467	15.2478937	-6.653706105	-9.092989506	17.81483998	13.23119977	-25.98017957	-4.833935725	0.670157007	-23.17754176	4.186444321	-1.610915042	-0.566864784	4.532559666	1.231993324	-7.99130651	2.00917109	1.049760697	3.967267139	2.701756027	-7.051004581
0.168049088	0.339076648	0.512200054	0.563418571	0.617560498	0.683983758	0.690964446	0.704634994	0.706568237	0.734160322	0.797884655	0.845664072	0.91525408	0.944883169	1.019204174	1.009474277	1.015508037	0.983531863	0.943331447	0.879426211	0.839668215	0.787502837	0.707688233	0.74552514	0.711795399	0.701640418	0.652094918	0.603534916	0.470631285	0.384815252	0.188826698	0.044168287	-0.193561919	-0.330561451	-0.492228788	-0.519667158	-0.632098304	-0.669107991	-0.635910581	-0.673775442	-0.677197106	-0.696459877	-0.784455533	-0.719633317	-0.799185334	-0.875312034	-0.932329502	-0.873667644	-0.936066468	-0.868128228
0.207402184	0.444329791	0.543689456	0.669008963	0.744613905	0.705235876	0.735241513	0.720405206	0.698588527	0.707806535	0.748353833	0.763015157	0.873606319	0.949278789	0.972259877	1.007131754	1.00504344	0.937507047	0.864176681	0.79164106	0.730721313	0.713931494	0.699608514	0.73403924	0.75683027	0.75371534	0.71677772	0.661966577	0.60564272	0.450896392	0.243439143	-0.034376867	-0.188583785	-0.406111301	-0.571074483	-0.685126162	-0.656254782	-0.723730878	-0.671490429	-0.700151043	-0.638847925	-0.643488258	-0.682904981	-0.742234527	-0.745372993	-0.814470761	-0.854433396	-0.882192567	-0.83868066	-0.830109265
0.111370039	0.173150385	0.300424266	0.361183163	0.469494541	0.585627254	0.649144556	0.689764374	0.783598399	0.846619474	0.878408512	0.916429003	0.9743581	0.986156654	0.970212747	1.000350922	1.001610006	0.938904201	0.975628598	0.923411834	0.893435335	0.860448192	0.767254431	0.677982162	1.130683416	0.56513164	0.481889681	0.374124553	0.305679287	0.192317407	0.081992592	0.02093319	-0.090876807	-0.185469403	-0.318026289	-0.400271499	-0.463110782	-0.616465539	-0.590920169	-0.689400019	-0.781380451	-0.832767602	-0.900801596	-0.908578826	-0.934050703	-0.984451527	-0.988419094	-0.997445496	-0.99555073	-0.987987094
0.071183249	0.190915295	0.302617536	0.377802401	0.434181693	0.541931151	0.659277367	0.677639558	0.73066284	0.803163456	0.912516221	0.906460088	0.962780691	0.968887711	1.003335784	1.000949261	1.01140509	0.997560353	0.97376209	0.933109074	0.923984988	0.829587866	0.784928265	0.680493526	0.316539832	0.584997543	0.463706312	0.403065315	0.307328482	0.210620258	0.130384083	0.045617941	-0.083416112	-0.195446834	-0.257065098	-0.34060826	-0.432034422	-0.522926783	-0.61578314	-0.684356772	-0.797965595	-0.855704043	-0.917716383	-0.902547935	-0.993076051	-0.984331179	-1.047653397	-1.010702685	-0.963796575	-0.973000864
0.099943357	0.188504123	0.303377543	0.398030524	0.465112276	0.550066713	0.658455991	0.706490226	0.759393435	0.774483596	0.847761288	0.90947896	0.951959233	0.977076497	1.014109796	0.993211701	0.997936423	0.96058609	0.960935311	0.946360271	0.892286228	0.830448287	0.76170612	0.705147751	0.361127728	0.597252471	0.50533696	0.384291223	0.307065159	0.195599355	0.102688214	0.018323055	-0.088813837	-0.206426034	-0.286362724	-0.41559952	-0.482585493	-0.599392466	-0.592984892	-0.716961131	-0.777037607	-0.819219264	-0.913999541	-0.957288339	-0.948129352	-0.948632303	-0.96282736	-1.040473242	-0.986664474	-0.97162467
0.124333696	0.195340372	0.320972841	0.362822892	0.489978771	0.546726042	0.638694253	0.719771911	0.782793181	0.825194013	0.870293552	0.947039054	0.950957394	1.001766699	0.995085187	1.001138991	0.938046859	0.986636562	0.965853479	0.915516235	0.886975363	0.883996388	0.757575978	0.723655159	0.646316061	0.536159592	0.454265589	0.415649944	0.276221901	0.182872729	0.086737623	-0.006178821	-0.104978096	-0.198955703	-0.285549471	-0.390648552	-0.470813366	-0.525519916	-0.669373168	-0.657646446	-0.758398719	-0.83337311	-0.90520974	-0.927592388	-0.961947347	-0.997405697	-0.944924607	-0.948620828	-1.004403155	-0.97405811
0.110344214	0.174423533	0.292655604	0.391901254	0.484796866	0.549299278	0.615543038	0.702848893	0.749958053	0.839779166	0.888754968	0.897121802	0.957686501	1.011456502	0.989860263	0.966124404	0.978842013	1.003035398	0.987257188	0.908980436	0.838688711	0.842288013	0.788444678	0.716208448	1.023926972	0.621270401	0.483995221	0.424182968	0.30669939	0.201974338	0.112416579	-0.062346686	-0.081268448	-0.159730966	-0.295960446	-0.33756836	-0.45121328	-0.549745851	-0.625403208	-0.723833983	-0.826061588	-0.815784524	-0.901143527	-0.922073565	-0.960306502	-0.948187023	-0.995161491	-0.996878371	-0.991901385	-0.989156138
0.105727944	0.200975171	0.293793644	0.331875533	0.475340305	0.496965318	0.622221768	0.719929826	0.776142415	0.823747331	0.892109673	0.92915769	0.960800614	0.997792027	1.000772171	1.007455736	0.986794762	0.981837041	0.961022724	0.917990134	0.889944229	0.813796004	0.782884228	0.747829363	0.638260278	0.555257112	0.450223523	0.392217209	0.286534919	0.225818653	0.079852073	-0.023778789	-0.118376989	-0.191944356	-0.288575756	-0.376169224	-0.451998776	-0.537507594	-0.626425623	-0.673079458	-0.757164296	-0.817932366	-0.860998141	-0.941408419	-0.932815983	-0.957667336	-0.98089706	-0.975233077	-0.997934289	-0.967278405
0.198560779	0.402386687	0.547570708	0.598569335	0.712049366	0.733048461	0.724539446	0.745316304	0.682327392	0.711051804	0.759343427	0.801331285	0.918404077	0.926018793	1.030693263	1.045708738	1.015737178	0.933531626	0.883609229	0.859801912	0.729974986	0.749826205	0.69170484	0.695308602	0.735010695	0.763886461	0.721876234	0.625611569	0.582809211	0.415793184	0.222199509	-0.023394751	-0.186905342	-0.381489369	-0.537175883	-0.607152519	-0.657970849	-0.663196434	-0.723730487	-0.630188287	-0.676474606	-0.633617366	-0.688084957	-0.746085033	-0.80110096	-0.798491767	-0.887356816	-0.899301583	-0.882587731	-0.843763039
0.088051831	0.18575324	0.298195003	0.351164249	0.442419875	0.567242013	0.629422567	0.725862037	0.766194163	0.842006774	0.855412718	0.942563354	0.95753097	0.989863557	0.992864233	0.97824295	1.009387845	0.981516858	0.957470552	0.936731961	0.887728778	0.835652793	0.779846812	0.716004563	0.244849854	0.57578997	0.505173519	0.387738022	0.308388923	0.20861867	0.105874272	-0.005426473	-0.107240447	-0.162434744	-0.277043753	-0.335815182	-0.500473326	-0.552730084	-0.623565114	-0.719281158	-0.735922739	-0.818302198	-0.893163219	-0.894741413	-0.947801541	-0.959377114	-0.968205468	-1.013516542	-0.973361652	-0.979561465
0.08140398	0.208739544	0.30902249	0.374224883	0.44937417	0.555094403	0.597909808	0.70382191	0.787220442	0.8136278	0.905739258	0.896721455	0.891839677	0.988365502	0.983926377	1.016188272	0.960069246	0.957216826	1.002649644	0.933322035	0.881546346	0.837549548	0.735214752	0.732889342	0.400447397	0.563340774	0.476213817	0.425549591	0.292324237	0.132176692	0.076848543	-0.022293375	-0.100233568	-0.177414055	-0.281399106	-0.380878142	-0.492086801	-0.551028871	-0.659623043	-0.672373252	-0.775173175	-0.863573291	-0.891778033	-0.936577211	-0.982210149	-0.985493436	-1.016358705	-1.022524551	-1.008398218	-0.960158047
1.879883234	-0.230327411	4.896835933	-6.969680558	-3.568535472	1.343544879	0.251812167	4.749653257	1.046215886	3.114865732	4.235207248	-2.391593016	-3.327273619	5.375688349	6.715019414	-0.358446139	2.209633473	-2.296566844	-2.32860385	-2.106330006	-1.956758491	1.253879704	0.355801897	0.839868086	-2.20206466	1.771977126	2.970987433	7.341226776	2.860770017	0.613799803	4.503592324	0.788353905	-0.809046731	-2.152691628	0.720449109	-1.315829332	-4.251613257	2.50699906	-0.545810871	-5.401160742	2.800610542	-1.546225312	2.132804104	-0.151208824	-2.11345281	-0.472876589	-1.223203356	6.562845784	1.594631219	-4.185773148
0.127694766	0.208740089	0.289041894	0.402239108	0.488745321	0.521249762	0.644650216	0.756522533	0.783400834	0.843405495	0.893141991	0.971556348	0.946556204	1.009932347	1.036922505	1.023902689	1.030388153	0.998189561	0.952425712	0.953935208	0.925384673	0.843975091	0.819744167	0.704433958	0.642785276	0.588299407	0.508050278	0.384738736	0.319002838	0.216009058	0.10041738	0.020172733	-0.087732781	-0.211736028	-0.309143817	-0.445579131	-0.525325349	-0.590346652	-0.663478713	-0.76599405	-0.816173923	-0.892120975	-0.905464944	-0.991099202	-1.072654475	-1.066869136	-1.051914534	-1.097760562	-1.072853854	-1.075998616
0.226678969	0.334987152	0.458019755	0.551605427	0.561573752	0.568558578	0.575556966	0.633057128	0.765216896	0.804391205	0.923718842	0.927694721	0.940891753	0.905290343	0.954733779	0.944032159	0.915699324	0.974952568	0.922326287	0.93368735	0.896200451	0.776365872	0.754240455	0.673098637	0.575857426	0.550814057	0.551281046	0.522020263	0.52015524	0.368187562	0.166290593	0.0097523	-0.225766405	-0.380332805	-0.44953644	-0.511719583	-0.569680262	-0.555101574	-0.60679526	-0.656243619	-0.701080116	-0.788067381	-0.857235347	-0.918354547	-0.9643942	-0.941616197	-0.896001301	-0.91374254	-0.937949885	-0.960185098
0.094572879	0.195058961	0.27502261	0.3704746	0.485967558	0.543297989	0.63044274	0.688449855	0.803886563	0.806769218	0.90625575	0.886366893	0.947286233	1.014695372	0.987725797	1.019031146	0.971727056	1.017691299	0.967956428	0.915971556	0.874503945	0.834912211	0.770714597	0.724615469	0.510165255	0.515690464	0.427692488	0.385854315	0.276115757	0.170402197	0.149001328	0.03505385	-0.053006983	-0.174946437	-0.246427506	-0.413616711	-0.497416072	-0.553217277	-0.629920136	-0.702419088	-0.766891213	-0.82775556	-0.857266545	-0.915608491	-0.97141304	-0.994977852	-1.004843747	-0.988830731	-1.021368708	-0.992182775
0.084208362	0.229161708	0.307409149	0.377339719	0.440787491	0.591108184	0.630387298	0.690228974	0.764006787	0.816834872	0.933351238	0.945013141	0.941764619	1.022448463	1.013104523	0.993193093	0.976284915	0.987695901	0.923784507	0.940967531	0.856748789	0.821002459	0.836490411	0.693117556	0.632191563	0.554297332	0.456801853	0.374758634	0.248329904	0.213122741	0.112785198	-0.014781113	-0.070769091	-0.200977439	-0.293396186	-0.418867586	-0.496891865	-0.599097504	-0.573966146	-0.689755062	-0.793118957	-0.866413094	-0.913555031	-0.96588693	-0.944466584	-0.968885953	-0.97937468	-1.030305255	-0.953340585	-0.957499274
0.037528944	0.186847918	0.3478893	0.512333343	0.576589601	0.548017602	0.434710655	0.238113177	0.061421849	0.082106559	0.114183775	0.054417367	0.120985627	0.310651312	0.41449954	0.480462824	0.421146705	0.281460004	0.113659533	0.021394968	0.100170868	0.077246213	0.045553459	0.247609811	0.416311774	0.561655851	0.573685145	0.509161413	0.359494636	0.184731345	0.065882604	-0.001700328	-0.051208187	-0.19554777	-0.3517471	-0.504330513	-0.575541978	-0.537551112	-0.435605478	-0.248189868	-0.055199692	-0.082137879	-0.108096032	-0.037336589	-0.105041854	-0.285467467	-0.419235148	-0.468368136	-0.422392335	-0.299928473
0.074401057	0.249476813	0.535205981	0.711619591	0.741820049	0.691911765	0.533762761	0.44561875	0.657032251	0.913260602	1.004949632	1.04279215	0.972134777	0.891933369	0.895083376	0.880141029	0.924322702	0.931394555	0.96979944	1.021647022	1.052088031	0.887388772	0.665205862	0.458468705	0.490002902	0.654866262	0.756389548	0.681456267	0.51812605	0.280308785	0.064620214	0.014929779	-0.089556899	-0.282591536	-0.472445932	-0.653777512	-0.760937211	-0.698242718	-0.524943933	-0.439161547	-0.598247911	-0.912501345	-1.053082087	-1.024102621	-0.944465154	-0.893543889	-0.872725155	-0.897215579	-0.918685721	-0.882376127
0.087634775	0.206259044	0.258782196	0.365592706	0.461120251	0.530026522	0.64794305	0.70784774	0.763643982	0.841604577	0.890787265	0.90693322	0.940565488	0.966890811	0.988146931	1.007023623	0.987159144	0.95940058	0.983316812	0.897526089	0.886773008	0.817687397	0.743349241	0.67266115	0.633716284	0.555477069	0.479894444	0.400149926	0.333706653	0.200399924	0.08743755	-0.002119257	-0.07204382	-0.153725844	-0.281817048	-0.392171468	-0.473140574	-0.520256148	-0.647130656	-0.686560584	-0.716842479	-0.791667343	-0.880791057	-0.956039242	-0.94322703	-0.979277366	-0.95167916	-1.0402767	-0.940834592	-0.988696542
0.075776841	0.199156952	0.322285614	0.418526243	0.470583606	0.556200202	0.636158531	0.704637476	0.757700351	0.821004625	0.933146184	0.929744212	0.965321369	0.972657303	1.012219406	0.992469038	0.998104526	0.982088518	0.949248124	0.936879217	0.839449034	0.806159228	0.740316394	0.721149198	0.494453543	0.577570989	0.454353345	0.380917523	0.278567445	0.204343879	0.102948506	-0.004485784	-0.098826699	-0.19609735	-0.31635497	-0.375840668	-0.482622419	-0.552034867	-0.615006369	-0.714728304	-0.758660362	-0.838565614	-0.867518586	-0.918779007	-0.987474763	-0.999317295	-0.97251539	-1.00107181	-1.005791118	-1.000734628
0.048607568	0.229675104	0.289369642	0.40445812	0.479817617	0.559948538	0.666363255	0.702556465	0.788385021	0.834684943	0.862905677	0.905861675	0.95340774	0.955838246	0.97983178	1.020822409	1.017543399	1.022269994	0.980338059	0.929771245	0.922099942	0.858355339	0.769748991	0.689080011	1.093627356	0.547164404	0.481843522	0.399423724	0.320404015	0.218753102	0.079282061	-0.00052475	-0.112535503	-0.20883088	-0.282898151	-0.381577432	-0.46460867	-0.504597359	-0.613477099	-0.722457386	-0.756106247	-0.834464868	-0.867615326	-0.910306152	-0.92916117	-0.999482385	-1.024571561	-1.025281316	-0.937761938	-0.961389121
0.1145528	0.192444837	0.305151398	0.371887534	0.457065072	0.519814738	0.640871736	0.703248662	0.801256886	0.8385198	0.871907855	0.926169684	0.995370064	1.071245336	1.005891358	0.971274628	1.03005439	0.976754961	0.96258514	0.939581239	0.892300407	0.797487911	0.778322726	0.727553725	0.630306462	0.567564998	0.459394055	0.45569811	0.252765024	0.202546365	0.1433969	0.001235586	-0.101713976	-0.189572066	-0.319775164	-0.390078356	-0.526012302	-0.540327794	-0.582986372	-0.663264628	-0.79959803	-0.863891891	-0.920594151	-0.958497607	-0.996828047	-0.991209299	-0.97317713	-0.980572667	-1.003060705	-1.000800627
0.049860349	0.194967181	0.373355369	0.529754874	0.565345174	0.491998586	0.272260104	0.093695944	0.323759623	0.499003715	0.599097338	0.55336876	0.413139606	0.311532525	0.218994594	0.208591824	0.201487533	0.28431218	0.421604645	0.54898131	0.601988843	0.483455235	0.307468157	0.121214644	0.281518616	0.475546982	0.584433786	0.512024829	0.375727378	0.163661406	0.084475006	-0.003220973	-0.025985353	-0.195661638	-0.351398554	-0.515059947	-0.556929712	-0.509098171	-0.312641382	-0.110769326	-0.317988751	-0.502407483	-0.587896614	-0.531325583	-0.406073232	-0.312724024	-0.192929069	-0.193071065	-0.215311615	-0.293221591
0.084423892	0.180209619	0.266533577	0.377703784	0.470455638	0.586870128	0.577586329	0.692416325	0.761415567	0.875819924	0.859755229	0.871278433	0.931809267	0.988457078	0.984554864	1.000555255	1.006722591	0.952881276	0.964373247	0.95706259	0.839859801	0.844210044	0.812171259	0.724111639	0.602642011	0.570139472	0.430297417	0.356122079	0.299079114	0.155029545	0.05815553	-0.005892274	-0.06232973	-0.207612673	-0.302082774	-0.356691383	-0.490035745	-0.549851746	-0.642984117	-0.709461694	-0.775026862	-0.807823772	-0.864177975	-0.892006989	-0.980068357	-0.981486498	-1.01954633	-1.00848468	-0.98596659	-0.996086147
0.156794822	0.201661884	0.306859276	0.374061431	0.474082889	0.615503208	0.631533439	0.717451319	0.81462053	0.830033467	0.941213117	0.94372944	0.935823411	0.990627711	0.979411597	1.022134763	1.011799698	1.020056369	0.94810013	0.919966819	0.89076881	0.804413528	0.793578887	0.692597087	0.280050126	0.560516014	0.469188613	0.377346015	0.29543402	0.174241189	0.133414565	-0.02716643	-0.123490437	-0.172955622	-0.285524436	-0.376926907	-0.487390102	-0.584447978	-0.637094343	-0.721848144	-0.77906594	-0.832579887	-0.881834436	-0.943367202	-0.92695856	-1.01106896	-0.945320613	-0.978372445	-0.983363741	-0.977170005
0.080806572	0.190289841	0.269961112	0.413806348	0.462170628	0.609927306	0.638646875	0.695616306	0.775149461	0.852602984	0.909273341	0.907803856	0.997274222	0.964320799	0.991019564	0.973311541	0.977505059	0.997352488	1.013948638	0.919223631	0.85044581	0.795206236	0.783792562	0.698558452	1.064199756	0.56153986	0.459817063	0.348361924	0.300383018	0.203389081	0.082233791	0.015825814	-0.074662307	-0.206674174	-0.285448722	-0.420769479	-0.465429782	-0.563884992	-0.686885972	-0.732767759	-0.770040488	-0.825386024	-0.877920627	-0.943381288	-0.940434883	-0.966078095	-1.001188415	-0.994306831	-0.96605882	-0.982381828
0.12862392	0.16931455	0.319158802	0.365297404	0.510110968	0.570144462	0.665077345	0.725970051	0.778556232	0.81327913	0.863467407	0.940438585	0.957571117	1.026299319	0.966680883	0.978569599	0.999783835	0.994476585	0.92029239	0.893949539	0.879717315	0.848915225	0.773240495	0.748597036	0.628425089	0.538616204	0.454606134	0.36223246	0.275407356	0.197158165	0.053204468	0.007957003	-0.087975655	-0.205746732	-0.330154552	-0.366559255	-0.462217255	-0.535401319	-0.67603948	-0.739834987	-0.785328774	-0.805895025	-0.86334079	-0.915347854	-0.966172257	-0.981368145	-0.957638965	-1.058551468	-1.040080939	-1.002044668
0.076936204	0.236285618	0.495976905	0.659296193	0.762814053	0.682893002	0.493020136	0.447191683	0.63776103	0.848219312	1.048137772	1.017514186	0.925822106	0.846222064	0.868055007	0.888357695	0.849978024	0.899570513	0.936333564	1.027043992	1.006824599	0.853068767	0.616864573	0.440828072	0.513460747	0.654303384	0.749434217	0.669808183	0.47725481	0.247211494	0.076059976	-0.017548741	-0.061765147	-0.2721527	-0.493790905	-0.682940195	-0.740106531	-0.678881304	-0.499754131	-0.420174507	-0.642533042	-0.861682715	-0.979841748	-1.000156123	-0.955505973	-0.883762973	-0.906816813	-0.898946501	-0.869630993	-0.897128268
0.100087303	0.217841629	0.303712773	0.396928194	0.458942871	0.543080002	0.632624084	0.70976466	0.778307361	0.848870432	0.86286709	0.915403851	0.973084473	0.966738234	0.986105932	0.989086459	1.005254106	0.993652543	0.931472749	0.937141942	0.87295535	0.83608014	0.770316784	0.729339178	0.635162102	0.541249766	0.496676855	0.418179554	0.30971497	0.192399312	0.114414194	0.008794664	-0.101495348	-0.176237279	-0.283478686	-0.367063226	-0.449282926	-0.555658037	-0.616388019	-0.696519366	-0.784267425	-0.847714407	-0.866386384	-0.92914996	-0.971540734	-0.9526415	-0.976597107	-0.992714618	-0.995342986	-0.99324178
0.109266457	0.220134368	0.288798469	0.444768749	0.465277954	0.520151808	0.589019289	0.697805821	0.770839548	0.825948327	0.867213623	0.984755829	0.990329157	1.016595014	1.089719732	1.039008855	1.066027598	1.029249548	1.012797863	0.971830432	0.928205725	0.901243651	0.847172931	0.755632752	0.723120657	0.612234766	0.458406512	0.38485746	0.307202067	0.184255222	0.11999249	0.024052357	-0.1262381	-0.26084557	-0.297024484	-0.395301761	-0.450736093	-0.563692582	-0.708751587	-0.755695265	-0.848943706	-0.921680536	-0.965682746	-0.980301455	-1.053792994	-1.041654263	-1.129571677	-1.141672964	-1.077142678	-1.055627686
0.198354653	0.31872893	0.410652614	0.540868654	0.513710531	0.584231005	0.569480573	0.709988076	0.779387796	0.790769765	0.911478244	0.906435468	0.989558219	0.959430787	0.966304423	0.962822223	0.922682997	0.99381269	1.005373452	0.900533746	0.891811893	0.808804577	0.764646715	0.659534971	0.62119461	0.594596011	0.541464959	0.515787995	0.420777068	0.322890106	0.165807843	-0.003040701	-0.15165856	-0.330019278	-0.400186663	-0.537004792	-0.56900253	-0.634737595	-0.597583355	-0.632708927	-0.711839627	-0.83672526	-0.897658318	-0.932737339	-0.95533964	-0.979793378	-0.910104259	-0.943870263	-0.965364641	-0.915420953
0.084625707	0.190160187	0.268880286	0.38569672	0.487145029	0.584148242	0.616552613	0.70896747	0.749723076	0.837164366	0.880685697	0.942824492	0.952254764	0.954088134	0.977814784	1.011837888	0.989952365	1.005681257	0.976716648	0.958351011	0.923237993	0.799344135	0.77835225	0.742485474	0.636457194	0.539086447	0.488372314	0.385335676	0.308646311	0.183436426	0.117576202	-0.00904472	-0.078863321	-0.187215763	-0.275589908	-0.372388457	-0.47328076	-0.540095749	-0.697290264	-0.712807159	-0.73294705	-0.788790523	-0.88839152	-0.901055897	-0.947166845	-0.952724569	-1.028802824	-0.99604317	-0.956894652	-0.970331948
0.096979707	0.192423811	0.320571163	0.375831601	0.478220018	0.544489164	0.61006992	0.724758953	0.762718335	0.848372237	0.872985642	0.944762667	0.972464406	0.966303504	0.958881878	1.010111899	0.969985253	0.989485959	0.981550694	0.942540772	0.892101938	0.849387755	0.743763654	0.735252726	0.66576201	0.56416879	0.483975879	0.402130867	0.283016249	0.200700386	0.061869373	-0.033875334	-0.0539181	-0.169625562	-0.295723722	-0.350022354	-0.465863386	-0.55778291	-0.618793417	-0.706077579	-0.805984194	-0.83334715	-0.877258882	-0.949169015	-0.967731801	-0.973435293	-0.97261394	-0.978130261	-0.985549905	-0.996897423
0.096041745	0.186234744	0.303647238	0.378236468	0.48376493	0.589901125	0.667685647	0.705968342	0.793833074	0.829562412	0.848880042	0.912547271	0.964423076	1.014740617	0.968662077	0.975090402	1.011387075	0.981645688	0.930066642	0.923130034	0.855827325	0.859336038	0.792926114	0.686983295	0.605165716	0.577351347	0.45611314	0.411063051	0.290432407	0.196613493	0.078222977	-0.010225703	-0.094380139	-0.175793468	-0.301526404	-0.402909932	-0.441549595	-0.540281326	-0.586384917	-0.708332323	-0.766062492	-0.806960014	-0.893976063	-0.862937559	-0.937868648	-1.01132463	-0.975466563	-1.046571762	-0.98333517	-1.032036904
0.112140197	0.201810668	0.321815099	0.37726117	0.488842431	0.590730023	0.629543331	0.708471837	0.753397501	0.818178232	0.864718005	0.894138953	0.95802113	0.961839725	1.029828174	1.003466108	0.990092729	0.992005698	0.968907138	0.990066515	0.840942386	0.837600923	0.762186445	0.755723832	0.597440021	0.548588339	0.515817854	0.382852975	0.267322281	0.161958719	0.089285615	0.034690454	-0.081516361	-0.205211361	-0.318224189	-0.365349146	-0.461083153	-0.54956319	-0.620139938	-0.686607728	-0.769896067	-0.835642521	-0.871538291	-0.936868612	-0.981203082	-1.00348768	-0.954004136	-1.0018449	-1.016292277	-0.992799988
0.10164235	0.185007263	0.275138907	0.349493783	0.514479125	0.542788212	0.623438987	0.755291212	0.791332212	0.827704436	0.830530135	0.959372102	0.965876726	0.979236278	1.022595163	0.98523957	0.991605167	0.973883554	0.924467749	0.906592556	0.906634369	0.866334208	0.763454726	0.720307371	0.638820272	0.559926744	0.455734427	0.368413703	0.255878297	0.178265967	0.086956322	-0.001904726	-0.07136018	-0.189573207	-0.302302192	-0.329631876	-0.470548969	-0.56036047	-0.607305491	-0.712130725	-0.749714	-0.805290619	-0.851163984	-0.956319446	-0.930648046	-1.016600579	-0.971174352	-0.987486111	-0.964062802	-0.98412346
0.07762209	0.191993345	0.297412214	0.410408053	0.467475452	0.522455648	0.659355466	0.710242449	0.774033383	0.860833836	0.907184487	0.959851629	0.980063645	0.959884982	1.024464307	1.040643072	1.006407265	0.982006302	0.959165353	0.905485949	0.833859079	0.829269289	0.747341835	0.715605831	0.366806505	0.558822495	0.500761955	0.364147718	0.26603856	0.156897809	0.106270783	0.037046432	-0.110011243	-0.191383141	-0.273366312	-0.425961085	-0.44336192	-0.558340075	-0.652981088	-0.691723132	-0.802118425	-0.833162123	-0.881544218	-0.900078214	-0.96533441	-1.039752305	-1.02237396	-1.011139343	-1.009424206	-1.017958874
0.093710714	0.261770232	0.487619106	0.705459035	0.810290052	0.696722689	0.513932391	0.460131826	0.64001696	0.897066684	1.081711198	1.056523188	0.98500535	0.974999615	0.954394844	0.941780653	0.916485319	0.963395726	1.015255248	1.078819876	1.064953445	0.904865503	0.682078856	0.477029638	0.507652384	0.699690765	0.811738563	0.686129239	0.496934518	0.300219613	0.068443057	-0.011888571	-0.064384013	-0.271698938	-0.51440854	-0.691193741	-0.768249919	-0.721224573	-0.503121133	-0.491692831	-0.666653613	-0.913278934	-1.080924564	-1.062058342	-1.047780062	-0.963304467	-0.953243294	-0.966014789	-0.951198344	-0.970322171
0.159187978	0.364634098	0.495118923	0.601106133	0.659276292	0.704363824	0.715250469	0.711930347	0.71153907	0.724936979	0.744033631	0.84501365	0.875629223	0.9639581	1.001028722	0.980986861	0.995826644	0.944544535	0.930530091	0.863218468	0.796772913	0.748435824	0.735858219	0.721281581	0.702218475	0.689241768	0.688305919	0.593784563	0.478422314	0.366094121	0.15408093	-0.001960921	-0.157112258	-0.359759213	-0.43676593	-0.617526004	-0.653000396	-0.66477628	-0.676376331	-0.676268954	-0.653522633	-0.640629595	-0.699210218	-0.767514206	-0.827984584	-0.875888792	-0.92747168	-0.912840855	-0.931093612	-0.843897481
0.108171833	0.147418592	0.305027566	0.359964321	0.453249194	0.535760115	0.672678713	0.713927737	0.812856208	0.841968543	0.87326993	0.958244999	0.958522809	0.99278538	0.982847265	0.970751068	1.005602184	0.954081527	0.969352618	0.913270403	0.891728404	0.853302116	0.769362185	0.673283985	0.628046134	0.523903835	0.485803443	0.408520538	0.264148222	0.199884922	0.11144953	-0.021806326	-0.078298877	-0.250207105	-0.256885968	-0.411668051	-0.471893963	-0.601786266	-0.642319275	-0.707184754	-0.772708709	-0.859354266	-0.873840617	-0.923182046	-0.977457193	-1.005707692	-0.969193948	-1.013692472	-1.011496423	-0.991006774
0.107583541	0.196910335	0.304000619	0.391228885	0.453265223	0.538053406	0.658116661	0.720056583	0.742567638	0.858473341	0.884677268	0.946774526	0.931712633	0.973179653	1.005258826	1.00114947	0.98927793	0.963626798	0.992514814	0.918003035	0.858388304	0.830938448	0.765889085	0.715939729	0.635519857	0.529962674	0.464163478	0.371577242	0.321868528	0.202178733	0.096198155	-0.019717579	-0.125129891	-0.173742542	-0.276190002	-0.382436578	-0.474290143	-0.588120889	-0.615912541	-0.676402636	-0.77839388	-0.804643742	-0.875989232	-0.909435768	-0.958330788	-0.992547616	-0.988042763	-1.011707851	-0.985554047	-0.977326576
0.072864816	0.195765797	0.29856897	0.43901662	0.463072111	0.566584741	0.630616327	0.70706031	0.796957633	0.844372466	0.866087322	0.920185129	0.959289136	0.952482676	1.011574248	0.99695972	0.99041093	0.965504547	0.963028714	0.922133477	0.899638283	0.801375986	0.797401974	0.718655246	0.646174195	0.560737298	0.47527223	0.34945218	0.305397883	0.184263549	0.10308216	-0.002929765	-0.080515354	-0.206969869	-0.298078655	-0.387272765	-0.47087755	-0.555964903	-0.615454694	-0.695819593	-0.773719595	-0.80923314	-0.864602382	-0.925340237	-0.959369401	-0.983861386	-0.982171026	-1.003870503	-0.979589618	-0.96040998
0.220044816	0.464712331	0.556130087	0.683279124	0.748228378	0.790439785	0.718868332	0.693974121	0.686040214	0.69864068	0.715575593	0.811083579	0.862935073	0.945282412	1.002202603	0.994450617	0.983405182	0.950442066	0.907349534	0.793588709	0.731146731	0.711236537	0.667211397	0.750837889	0.727732577	0.785841727	0.779668035	0.682279908	0.619335543	0.45804359	0.228770098	0.012945478	-0.206443019	-0.472255297	-0.573486506	-0.684335318	-0.693900092	-0.751034946	-0.685543424	-0.660468347	-0.631492913	-0.634325446	-0.647076703	-0.701812042	-0.825746409	-0.814684523	-0.900408652	-0.921095501	-0.845007894	-0.816141165
0.181091022	0.41899416	0.610106669	0.692053181	0.742677838	0.740530095	0.741977525	0.714132439	0.665467661	0.707046626	0.709789687	0.778583853	0.862296459	0.895117611	1.041796014	0.979822198	0.980434803	0.893782383	0.898527755	0.810899355	0.739497861	0.702009738	0.6571597	0.69541027	0.731781535	0.735936978	0.721219847	0.720784818	0.589591734	0.431445439	0.215590012	-0.010745026	-0.247865589	-0.41969096	-0.518691675	-0.651937939	-0.644287806	-0.702139484	-0.666263415	-0.653069702	-0.621063826	-0.659040388	-0.681438406	-0.703985909	-0.803928945	-0.782649332	-0.895353228	-0.87464961	-0.928710792	-0.816016858
0.106522318	0.241930114	0.457364652	0.634490614	0.693152928	0.63727891	0.450869743	0.388472258	0.602525595	0.782761062	0.909111589	0.940394728	0.910417415	0.799934564	0.761465345	0.797672046	0.779904526	0.78884654	0.852616987	0.91163435	0.93391363	0.804154474	0.586568078	0.406005337	0.479652101	0.64868799	0.685039986	0.638010239	0.477635127	0.265064199	0.083293105	-0.017330435	-0.074972172	-0.243040634	-0.454411517	-0.671541962	-0.662325776	-0.645077179	-0.481297279	-0.392552279	-0.57551397	-0.79378621	-0.927032619	-0.923010654	-0.841658955	-0.795831225	-0.79766346	-0.794055376	-0.772943985	-0.799368277
0.104059706	0.179610457	0.293002541	0.376229752	0.473068444	0.533677759	0.64162888	0.761677018	0.791053891	0.819177157	0.925318877	0.937961421	0.989998938	1.011054407	1.02181277	1.030531259	1.055727794	0.975384541	0.996934828	0.931390933	0.902431354	0.89578307	0.797126383	0.728141627	0.643178455	0.606241955	0.512731108	0.387623527	0.335390659	0.192906165	0.126005597	0.004290416	-0.122191279	-0.216367212	-0.302312444	-0.423060383	-0.530442427	-0.583562411	-0.682242769	-0.739187288	-0.820807709	-0.91264023	-0.964353584	-1.015269874	-1.024590635	-1.076580763	-1.111116286	-1.142756845	-1.121963813	-1.076532242
0.062744392	0.184749108	0.359142066	0.500897002	0.586170079	0.53980057	0.436339104	0.254261508	0.073432748	0.060856622	0.078895201	0.00679972	0.143608567	0.291340218	0.411420947	0.501748384	0.435756501	0.306012154	0.13856317	0.007605796	0.096191123	0.068091951	0.066021948	0.242277656	0.427337765	0.552545264	0.584527742	0.517050064	0.332956468	0.205541645	0.050769632	0.014104568	-0.055548743	-0.179890813	-0.343110533	-0.509479389	-0.573239251	-0.560645028	-0.429857375	-0.247400016	-0.056739145	-0.055405448	-0.092827598	-0.011398394	-0.123035393	-0.305801584	-0.449219657	-0.482704029	-0.436276849	-0.321042035
0.062012037	0.211922866	0.301967049	0.371869562	0.476268065	0.568611523	0.617619456	0.726540972	0.759750861	0.834731542	0.92336189	0.944210733	0.965809968	0.968630672	0.941655334	0.957282179	0.991548504	0.945744287	0.9437133	0.910905614	0.8533192	0.827281679	0.750984716	0.709962174	0.493705416	0.585733956	0.445762582	0.357389298	0.2795446	0.205661745	0.077116767	0.011711697	-0.110830889	-0.159240281	-0.262967964	-0.368540091	-0.46762822	-0.532400839	-0.602696395	-0.699146278	-0.776429075	-0.815319053	-0.912853381	-0.95449588	-0.962783135	-0.972456108	-1.007745047	-1.003231123	-0.95905789	-0.999478268
0.09333638	0.157309712	0.310449908	0.425515927	0.498276393	0.56036315	0.642955475	0.666295895	0.783654274	0.807491852	0.86062421	0.953332146	0.97807676	0.999103995	1.005448406	1.015499856	0.992477943	0.970931984	1.018030767	0.899135289	0.897162302	0.85075828	0.779316603	0.703763309	1.061804366	0.535104654	0.448594156	0.361565057	0.283645716	0.191435839	0.114309285	-0.005119515	-0.078185704	-0.198373409	-0.323228685	-0.384664661	-0.47714645	-0.554610438	-0.659416737	-0.734303865	-0.789780179	-0.860320808	-0.865266386	-0.910199038	-0.954725395	-0.959249373	-1.026950447	-1.020829782	-1.035254174	-0.970478969
0.109252556	0.194693483	0.281566268	0.392018745	0.453292938	0.568252821	0.665590444	0.688941335	0.819739213	0.8168781	0.861847799	0.928840215	0.932991489	0.973839732	0.991168914	0.991060214	1.003202596	0.947262235	0.947149745	0.932940901	0.899476446	0.824530541	0.792562089	0.738475487	0.443358466	0.578504264	0.427284487	0.371469178	0.30309134	0.184776777	0.138737683	0.019302924	-0.091356842	-0.197001992	-0.287624744	-0.363807051	-0.523946017	-0.535335444	-0.650465227	-0.713271787	-0.722616493	-0.802166604	-0.927469498	-0.905960723	-0.947307646	-0.979134914	-0.992538043	-1.005210989	-1.004602019	-0.970403295
0.083020445	0.193488741	0.332822816	0.399400463	0.485802008	0.562599986	0.67378603	0.738002835	0.787920045	0.843627194	0.900663511	0.910715811	0.983344753	1.057301515	1.045008745	1.035302637	1.010611345	0.970005662	0.980313497	0.935569533	0.908534796	0.862687833	0.844613823	0.731368628	0.675987523	0.561588998	0.455254866	0.380468724	0.3034725	0.234669488	0.148962211	-0.010391126	-0.101027233	-0.171178069	-0.29185032	-0.404716573	-0.480706883	-0.567796614	-0.66729428	-0.757905413	-0.839450647	-0.833994371	-0.974722354	-0.97352919	-1.019474035	-1.032799795	-1.045955719	-1.112767178	-1.074925969	-1.057532913
0.135103574	0.193618566	0.313858042	0.395940596	0.495454263	0.540423045	0.659632738	0.635907116	0.750335296	0.852335777	0.877683766	0.918839765	1.005310384	1.003433331	1.043771731	1.089420703	1.003848718	0.946867869	0.989739333	0.931429797	0.898871058	0.849407118	0.812883226	0.708228823	0.677563652	0.584607217	0.46364395	0.408331056	0.274470301	0.214718823	0.123357836	-0.040766262	-0.107602968	-0.222368044	-0.286176499	-0.432832934	-0.464863772	-0.561279916	-0.700388044	-0.724335002	-0.793152756	-0.904401924	-0.921404881	-0.969004261	-0.988379991	-1.069266361	-1.038447272	-1.059102224	-1.096089742	-1.091835066
0.096406763	0.160333006	0.317129765	0.386225727	0.464794928	0.604705626	0.623918521	0.694259389	0.827417892	0.853905006	0.91436092	0.944238574	0.941519641	1.019630513	1.022670248	1.053637916	1.020409677	0.94666708	0.993476852	0.963680307	0.929918355	0.919063954	0.769214401	0.785775971	0.65457691	0.594463636	0.521546612	0.410699258	0.322240134	0.228247142	0.09855507	0.00287342	-0.130649155	-0.213518141	-0.326066853	-0.431948724	-0.522070791	-0.585391865	-0.704636754	-0.730602713	-0.801738206	-0.893830363	-0.960685946	-1.039421186	-1.052295438	-1.072801326	-1.091704444	-1.115321929	-1.06902433	-1.131691349
0.112216262	0.210273836	0.295671437	0.36605648	0.479052504	0.55033787	0.63341178	0.700244554	0.769792472	0.835628357	0.88765391	0.953465913	0.981328637	1.003671709	0.953276383	1.047640534	1.017807813	1.018239616	0.952412359	0.984113601	0.895604158	0.842647472	0.815713851	0.717036311	0.686728785	0.561130686	0.516528982	0.435619708	0.304786792	0.198523467	0.11797529	-0.024873534	-0.1084552	-0.243274987	-0.27847874	-0.388904897	-0.523049287	-0.590821416	-0.680924923	-0.770194663	-0.843103083	-0.905331441	-0.918010627	-0.965113773	-1.023827861	-1.054431084	-1.111168433	-1.096713119	-1.083959613	-1.07673642
0.113874817	0.21613728	0.250869534	0.336747229	0.514011746	0.486975843	0.627525185	0.745295546	0.769359054	0.808687148	0.907839622	0.901340928	1.008496898	0.967483978	0.953525013	0.997984142	1.023991949	0.942366058	1.00091381	0.870371697	0.908213866	0.862116198	0.804762261	0.717531545	0.583810254	0.529121856	0.46511294	0.40187406	0.341693506	0.162459628	0.084265931	0.0112998	-0.055041772	-0.192513823	-0.262752462	-0.350585491	-0.484330876	-0.536896632	-0.612664341	-0.68058924	-0.723038579	-0.825250831	-0.91245108	-0.940180706	-0.944254555	-0.93827636	-1.008766628	-1.016033053	-1.004022496	-0.966623493
0.117555527	0.190774917	0.281015988	0.380975999	0.470991203	0.541009064	0.616138368	0.706859432	0.807117038	0.849558645	0.869934517	0.930837865	0.97501645	0.943033053	0.99405529	1.010801745	0.99138213	0.993511264	0.990976095	0.933578597	0.882338532	0.840668826	0.75248202	0.708604227	0.652086978	0.539890384	0.465433614	0.402695408	0.325979882	0.197305605	0.054973966	0.013286604	-0.099162636	-0.203004748	-0.260718615	-0.372983543	-0.439640838	-0.56813346	-0.627952267	-0.763490863	-0.767735787	-0.823660173	-0.878975013	-0.893278122	-0.960816219	-0.970522777	-0.990726881	-0.980991105	-1.013551643	-0.992075404
0.115429707	0.222394881	0.305301933	0.397413527	0.475507352	0.546263374	0.647839649	0.723624957	0.779617564	0.84864574	0.886472995	0.946360272	0.968932952	1.031563356	1.008280518	1.029780909	1.030164041	0.995981649	0.989106186	0.919586779	0.922351153	0.864450082	0.838939731	0.744951375	0.669503508	0.593179949	0.479653624	0.413831707	0.287254634	0.20126111	0.09533519	0.013646998	-0.066858512	-0.191709059	-0.271858789	-0.351139489	-0.526361127	-0.580625169	-0.67310786	-0.749030751	-0.809492446	-0.896918897	-0.946112196	-0.955359161	-1.033724724	-1.042693226	-1.096114086	-1.092101164	-1.088725013	-1.043332142
0.092267337	0.209331503	0.312084982	0.393993645	0.467113922	0.570752167	0.621755306	0.719010472	0.77316252	0.851684794	0.90588593	0.952548333	0.975913125	0.980882248	1.040344125	1.034404718	1.015979778	1.004710822	0.95630172	0.954262166	0.908774172	0.913162797	0.81934625	0.733280383	0.688971709	0.588468646	0.515071272	0.41021613	0.336762821	0.214573251	0.125244405	0.001398977	-0.133145814	-0.194551286	-0.343385692	-0.354314341	-0.525781892	-0.59593199	-0.658115441	-0.777161452	-0.849819199	-0.894608418	-0.970252265	-0.964395649	-1.045164389	-1.080124589	-1.052595027	-1.072801303	-1.077503562	-1.08695187
0.050202086	0.233951384	0.474177608	0.670810517	0.72992046	0.649753545	0.468816851	0.415696986	0.631455237	0.84950314	0.978221906	0.959027182	0.901718447	0.884418235	0.859757754	0.840885567	0.850094583	0.856688338	0.894525774	0.956956828	0.990617232	0.859986659	0.6140949	0.416323956	0.460377744	0.671009039	0.723774946	0.655998648	0.470177893	0.247609502	0.079484561	0.022125987	-0.074643443	-0.243979609	-0.467549227	-0.646088626	-0.732173317	-0.658578074	-0.483322216	-0.406430117	-0.628129716	-0.837590229	-0.990414715	-0.960763806	-0.920123841	-0.86544955	-0.85614648	-0.827147497	-0.835012185	-0.837404116
0.119386556	0.173117181	0.297080539	0.372363137	0.493005629	0.578815902	0.638194529	0.720925336	0.803145096	0.837005142	0.91110913	0.94198787	0.952115434	1.023403488	0.977400584	1.001313329	0.972463574	0.957495095	0.967590338	0.900014458	0.872159979	0.829643707	0.787173322	0.711653343	0.623969996	0.546397502	0.460453089	0.372821187	0.306393479	0.201996164	0.11643876	-0.00715016	-0.091506263	-0.1822744	-0.278256299	-0.38650869	-0.448327724	-0.552913408	-0.624367562	-0.706907609	-0.765775872	-0.821853948	-0.877719422	-0.923576862	-0.952564896	-0.969740741	-0.970659428	-1.007029467	-0.983673464	-0.977735074
0.241460095	0.41298364	0.548407121	0.639656352	0.698976108	0.710202511	0.723216593	0.693979402	0.683525073	0.689036769	0.679013214	0.811711859	0.847413555	0.876833098	0.989580331	0.968352685	0.957518384	0.969151756	0.859807913	0.803389815	0.733067464	0.693048334	0.677591327	0.717856599	0.731369222	0.79247168	0.716330855	0.693695332	0.562832768	0.388484378	0.212971805	-0.036559024	-0.185467454	-0.407902955	-0.555897006	-0.616719519	-0.677319101	-0.719929984	-0.681933283	-0.648239772	-0.635513403	-0.616894926	-0.67453667	-0.732388756	-0.779198146	-0.867517796	-0.909007354	-0.889650556	-0.897254132	-0.818505052
0.069991025	0.242032065	0.454864306	0.584582601	0.721629254	0.633939636	0.464896861	0.381180381	0.540001563	0.752559189	0.897232525	0.894215676	0.83950535	0.751452842	0.784374623	0.715249676	0.769184404	0.73864594	0.83912935	0.88887673	0.866730108	0.751185879	0.552517617	0.351074301	0.458213679	0.596864807	0.672602764	0.629843137	0.479106652	0.20701009	0.080133404	-0.004967513	-0.072489503	-0.208665472	-0.441626182	-0.613273371	-0.702784754	-0.621617542	-0.46046014	-0.341711191	-0.544221603	-0.771470972	-0.916037107	-0.882241846	-0.800806504	-0.773520063	-0.724610486	-0.760101002	-0.76889094	-0.726355031
0.150280904	0.202367308	0.301884374	0.37309607	0.427965098	0.566897899	0.62884984	0.770617186	0.722817933	0.862065031	0.913983403	0.933998868	0.981974643	0.94558127	1.004787293	0.999205736	0.996340686	0.996844373	0.995551611	0.872861933	0.896917142	0.856354832	0.773150535	0.691524085	0.654004834	0.518394059	0.422311522	0.375748007	0.306417044	0.237475733	0.117123177	0.020915429	-0.090851545	-0.163913487	-0.336460089	-0.38627904	-0.516939961	-0.573651346	-0.612959656	-0.733610017	-0.731417327	-0.848340813	-0.902932756	-0.902970267	-0.981831605	-0.964077625	-1.022592001	-1.03155612	-1.008378062	-1.021614472
0.082867511	0.265102854	0.256159081	0.40011665	0.533974902	0.557004863	0.681441809	0.727841574	0.78475216	0.812740932	0.944785518	0.96909724	0.948149428	1.008585983	0.993003174	1.085937927	0.968433058	1.003560557	0.959771048	0.92329142	0.856084032	0.762075425	0.738411606	0.754319107	0.649292429	0.502049764	0.459771638	0.397585862	0.339887848	0.175583985	0.105022409	0.024775421	-0.115236136	-0.229221727	-0.28020921	-0.335869508	-0.440559122	-0.547366056	-0.634578765	-0.741869686	-0.782330815	-0.794690861	-0.831009945	-0.929785025	-0.936695391	-1.001530044	-0.938634545	-1.007567795	-1.005759402	-0.984548751
0.10163526	0.168620609	0.282771722	0.41066391	0.493198847	0.5507744	0.588355066	0.711492566	0.792898365	0.831818755	0.911268197	0.93156111	0.96166949	0.956835608	1.013900958	1.014262721	0.994047723	0.978968638	0.967102335	0.91057415	0.868457269	0.826982189	0.800161784	0.70255625	1.13311475	0.579745262	0.477770944	0.356676449	0.316847347	0.155419507	0.082683536	-0.02729105	-0.106820346	-0.189524887	-0.291291308	-0.404533682	-0.460788433	-0.539346208	-0.6228676	-0.713636685	-0.773103516	-0.82804406	-0.835339618	-0.919724288	-0.968660357	-1.003594988	-0.952584167	-0.98793474	-0.972961511	-0.960533181
0.115795913	0.183598691	0.277703202	0.400047802	0.489967543	0.580122101	0.637514994	0.736110428	0.755835471	0.849861122	0.86933421	0.911256477	0.953856224	0.989711868	0.998076084	1.001317071	1.009414345	1.004323553	0.972094731	0.94678232	0.896971907	0.813869271	0.793884313	0.706090424	0.610590578	0.562548685	0.484911629	0.365778803	0.291637439	0.208526975	0.128582036	0.009395566	-0.102881516	-0.214949857	-0.314190982	-0.365870658	-0.457983438	-0.545798246	-0.619744868	-0.69464087	-0.764145946	-0.847728458	-0.879187225	-0.955147273	-0.959395595	-0.974645293	-0.969474498	-0.952516678	-0.997877734	-0.995717931
[truncated: 635 more rows]
[truncated: 590 more columns]
