# Supplementary material for: An Improved Power Quality Disturbance Detection Using Deep Learning Approach
Source: Hindawi journal article supplement (doi:10.1155/2022/7020979), 2022-05-21
Supplement: f1 [file 7020979.f1.zip › 7020979.f1/x40db_test.txt]

0.092514106	0.193159126	0.30040357	0.381373939	0.476366505	0.55780213	0.631544322	0.700628797	0.780208263	0.83712951	0.883881594	0.917414032	0.951024874	0.978094521	0.995509812	0.998067225	1.005465733	0.988350878	0.961483762	0.927741311	0.891352941	0.844663584	0.767567876	0.709919585	0.643658109	0.569036526	0.469325722	0.381372461	0.290531829	0.198141507	0.097821696	0.007755469	-0.093496941	-0.195759042	-0.287691635	-0.385269233	-0.464636053	-0.555642676	-0.636175594	-0.710072653	-0.772891145	-0.833889364	-0.880792163	-0.918694903	-0.963015821	-0.988033565	-0.995263623	-0.9951614	-0.993151858	-0.97293533
0.095241404	0.200045782	0.286941768	0.377588851	0.479686021	0.559326449	0.642663767	0.708787221	0.769004002	0.840599516	0.883187732	0.929401188	0.960896985	0.980430583	0.992836785	0.998938078	0.991594566	0.990649541	0.9498029	0.922257028	0.887372741	0.832135114	0.781511994	0.708784408	0.6450304	0.549804703	0.47894282	0.391353417	0.282547286	0.193731729	0.09890538	0.005167939	-0.096306633	-0.205693809	-0.292229592	-0.377429107	-0.465723845	-0.543930228	-0.639969777	-0.708824989	-0.77170522	-0.832483035	-0.874294212	-0.925120792	-0.94997398	-0.984098865	-1.003885995	-0.997762903	-1.004419153	-0.990208885
0.096719254	0.196365597	0.290514534	0.390139504	0.476323266	0.551856501	0.640038335	0.707917912	0.777647173	0.827287607	0.889947658	0.922537386	0.962037858	0.980544819	0.987802792	1.002264456	0.997160742	0.98966187	0.949709837	0.928651401	0.875376433	0.829324437	0.767591098	0.711593656	0.632791035	0.552443909	0.474846614	0.380989703	0.299390372	0.198176597	0.106531998	-0.003210657	-0.100304778	-0.197338996	-0.306048322	-0.376927633	-0.465880164	-0.563587423	-0.643959521	-0.713032456	-0.764434443	-0.826896915	-0.88693467	-0.928477581	-0.952585239	-0.973469538	-0.98159694	-1.001884129	-0.990089489	-0.978993667
0.092259278	0.199652957	0.284857235	0.389011984	0.471420377	0.57035108	0.64233915	0.729844284	0.798686806	0.841706385	0.888174193	0.94977116	0.991606973	1.006002322	1.02042397	1.031258071	1.0230607	1.018257297	0.98235222	0.966731106	0.923596191	0.871502514	0.81522084	0.732084107	0.680749635	0.567219254	0.491399627	0.389609159	0.292612487	0.213426392	0.103312794	-0.022685544	-0.088614684	-0.208700574	-0.303903646	-0.41825162	-0.498917583	-0.586126328	-0.671409338	-0.746213755	-0.831903951	-0.899843027	-0.951417366	-0.995698763	-1.037373517	-1.078345008	-1.088173211	-1.086772716	-1.101888728	-1.044478419
0.090635022	0.201551285	0.290714274	0.39255967	0.475871406	0.566012877	0.645707501	0.712371157	0.79259301	0.849683234	0.899365457	0.940343884	0.976603709	1.001613012	1.040399668	1.023311318	1.022152012	1.020969755	0.991928672	0.959698392	0.934975827	0.877713574	0.81034645	0.74138217	0.670087977	0.584481493	0.491522828	0.402700025	0.313660742	0.202283975	0.09591158	-0.005869832	-0.097293607	-0.192675248	-0.300046712	-0.405805843	-0.495821231	-0.58040112	-0.682084648	-0.757330224	-0.825463788	-0.886862525	-0.940975248	-0.986666579	-1.031181031	-1.045817547	-1.078485467	-1.088760979	-1.072987154	-1.058249687
0.102833228	0.191948745	0.27460252	0.381604959	0.46567096	0.555709607	0.620859497	0.702003606	0.785550061	0.830566879	0.889566245	0.913582189	0.970371578	0.971504883	0.989838113	0.985048625	0.982828496	0.981448746	0.954027115	0.917903059	0.885412408	0.841183003	0.773127804	0.696122403	0.642926281	0.547891385	0.47766629	0.389106903	0.296109426	0.194125991	0.101950831	0.004167756	-0.093816213	-0.190137915	-0.288015842	-0.368274667	-0.490550278	-0.557919642	-0.622889347	-0.707440039	-0.773495133	-0.831730181	-0.873637499	-0.924340149	-0.95188144	-0.968481811	-1.006326414	-1.001534588	-0.997348197	-0.983967563
0.097082375	0.186766775	0.292158695	0.382950935	0.468501665	0.544822892	0.631447487	0.715385769	0.778708789	0.831724154	0.889334364	0.923251233	0.960873242	0.986272096	0.998999541	1.000217958	0.995806524	0.986874698	0.956197649	0.92850118	0.888165464	0.813893615	0.780690568	0.717553484	0.28489604	0.560946788	0.479386248	0.372199897	0.291177427	0.185499299	0.108981097	0.000103064	-0.094523385	-0.197301143	-0.294783708	-0.385060276	-0.467287953	-0.547537645	-0.625559711	-0.702249086	-0.7719164	-0.846060889	-0.879165988	-0.916328668	-0.947640079	-0.97970365	-1.0002905	-1.005010578	-1.001582105	-0.976786047
0.262760084	0.472325457	0.59729261	0.634902126	0.613536108	0.587373591	0.564478292	0.61689023	0.694252239	0.780624964	0.87168299	0.921713565	0.922589498	0.907945498	0.871441265	0.854920117	0.860664177	0.905045666	0.924985145	0.919550464	0.886396758	0.796823482	0.689286627	0.617036748	0.561576983	0.586345098	0.612393813	0.638968248	0.605699102	0.47301458	0.268004821	0.00663716	-0.264400711	-0.47906382	-0.592161875	-0.64606789	-0.624321562	-0.587760761	-0.560158589	-0.594535303	-0.687946205	-0.780088241	-0.882492021	-0.920997409	-0.923823897	-0.908235503	-0.871543216	-0.84742878	-0.875582848	-0.911400645
0.104589651	0.18394573	0.290733585	0.372990297	0.47901227	0.559433085	0.635593217	0.710383773	0.768879046	0.825657471	0.888826569	0.918296542	0.953376467	0.977113633	0.989859011	0.99578522	0.988109238	0.970720775	0.950013866	0.913660291	0.885580863	0.83644367	0.770820594	0.701550768	0.639029111	0.560773546	0.475076917	0.368545195	0.296271222	0.203478824	0.103758292	-0.009418593	-0.092606112	-0.177200014	-0.293355754	-0.372946081	-0.464947486	-0.556883574	-0.63330664	-0.703214337	-0.772046933	-0.833713323	-0.889841272	-0.926607613	-0.953857267	-0.979703776	-1.000055614	-1.001180364	-1.001907676	-0.976991779
0.103066355	0.188971987	0.285838163	0.376434555	0.483444158	0.558589936	0.642059428	0.695909963	0.761055456	0.837247544	0.879406323	0.920193156	0.950237414	0.979357354	0.988792493	0.989793525	0.993176072	0.988478764	0.964254328	0.93117402	0.878181113	0.825216294	0.783254858	0.706147952	0.622668832	0.559628786	0.476237096	0.375892866	0.295674569	0.192676964	0.106021243	-0.001675597	-0.100174083	-0.19790866	-0.27530507	-0.38477237	-0.464659717	-0.565276237	-0.639535823	-0.707050225	-0.775808248	-0.838933545	-0.871905092	-0.923099756	-0.960369533	-0.96419161	-0.999947783	-1.006518015	-1.000280749	-0.981639504
0.098334566	0.184720214	0.293850639	0.397831515	0.466792725	0.558112613	0.64419463	0.700391263	0.762223297	0.830993061	0.884412313	0.921759736	0.952433833	0.977781848	0.999283413	1.010370441	1.00330828	0.983987585	0.952621531	0.933523452	0.893412813	0.835249299	0.77022835	0.710853069	0.642235039	0.569842896	0.482519861	0.377422195	0.286621681	0.186052727	0.091103042	-0.00415896	-0.097536653	-0.187275953	-0.281002027	-0.372427646	-0.469698221	-0.544941185	-0.641714004	-0.713740658	-0.77006715	-0.817921938	-0.896895113	-0.92622103	-0.95646785	-0.980904426	-0.994739254	-1.003370885	-0.982903406	-0.98547033
0.097488042	0.189843269	0.295233869	0.382411912	0.481066197	0.569212735	0.63547676	0.706123174	0.768129805	0.82708519	0.895981895	0.945928878	0.969132022	1.000896067	1.014734812	1.024868412	1.020450281	1.00400699	0.989842852	0.955941976	0.914914033	0.860710622	0.80427406	0.732953877	0.655621108	0.58133492	0.496946578	0.406022903	0.311782882	0.20794926	0.100099843	0.002133971	-0.092172869	-0.20274336	-0.301951007	-0.413597248	-0.504348209	-0.595693333	-0.668170096	-0.754583131	-0.821750493	-0.889238474	-0.949809541	-0.98393856	-1.031550252	-1.064056131	-1.068793245	-1.08321515	-1.080864316	-1.057936592
0.047322898	0.175226386	0.335192059	0.488352259	0.567665141	0.556485977	0.456012537	0.300138668	0.153352092	0.055699527	0.043073986	0.117839307	0.269477133	0.433580511	0.553083792	0.606841406	0.563858792	0.428860821	0.269731298	0.122504074	0.039356908	0.051180728	0.149743848	0.295743123	0.451443026	0.551952527	0.568804462	0.487340166	0.344799077	0.183951534	0.047315259	-0.00607173	-0.042775541	-0.167776426	-0.339066781	-0.485644217	-0.56691806	-0.561988069	-0.451585343	-0.305790679	-0.156329773	-0.050226806	-0.042836719	-0.11950302	-0.258097128	-0.425165303	-0.552377705	-0.605064842	-0.56445833	-0.435567585
0.053690078	0.196884758	0.373062096	0.516069046	0.579994497	0.545637235	0.388226095	0.175210992	0.04502489	0.202698811	0.255577021	0.187932301	0.030641477	0.14034257	0.285885108	0.330244326	0.299410935	0.147790165	0.021923929	0.176072283	0.239931891	0.199435254	0.049689397	0.162354933	0.376516698	0.532767938	0.591309424	0.527659902	0.377413216	0.196235525	0.05454138	0.003041035	-0.050190705	-0.181651966	-0.368592507	-0.51373295	-0.591856604	-0.546763934	-0.389181055	-0.170859999	-0.039665785	-0.195372185	-0.240533642	-0.185735884	-0.037508063	-0.13161708	-0.281205099	-0.348758435	-0.287764163	-0.156837457
0.112259131	0.188274435	0.289552517	0.388652669	0.467217079	0.560402208	0.627215881	0.71355311	0.764810574	0.830727683	0.881553709	0.927073983	0.95356658	0.975455646	0.992271538	0.991362413	1.004117952	0.98237574	0.960711546	0.923760366	0.881339523	0.830473138	0.77951637	0.707937401	0.640653918	0.548995344	0.470593538	0.377332277	0.29082685	0.191859891	0.096275605	0.002475753	-0.091988564	-0.188149038	-0.29396521	-0.378158119	-0.467770456	-0.555255983	-0.64171341	-0.705913134	-0.774160269	-0.834622215	-0.875728068	-0.921955063	-0.944626504	-0.975804404	-0.990736924	-0.996423649	-0.998262835	-0.973273159
0.106660144	0.186438913	0.284352332	0.392287489	0.465237904	0.563769962	0.642944662	0.716323514	0.781136765	0.855039552	0.899984465	0.944605929	0.986076885	0.995083694	1.032209404	1.044772433	1.028997008	1.026841039	0.995403054	0.967232234	0.915723178	0.883595669	0.806399281	0.731961379	0.673231277	0.582035287	0.502101854	0.40596509	0.319793289	0.203445414	0.111147139	0.015143673	-0.106767575	-0.209319533	-0.326519299	-0.405950035	-0.488185049	-0.583397401	-0.678772487	-0.750106871	-0.822648662	-0.871870407	-0.954606157	-0.99785939	-1.031814743	-1.050643534	-1.068307751	-1.074444074	-1.083290328	-1.064288695
0.094087375	0.191358815	0.293565301	0.384831439	0.467215228	0.555381329	0.636420212	0.699330149	0.77308703	0.823627273	0.879328555	0.931973062	0.963364684	0.984100988	0.988545358	1.003343266	0.99609229	0.983768476	0.9588383	0.929308938	0.885668374	0.835541172	0.768959426	0.716795802	0.6354552	0.564278528	0.470722061	0.389639184	0.297013527	0.19463942	0.096013793	0.001563639	-0.097919929	-0.188473611	-0.295750591	-0.389498183	-0.463506792	-0.559643101	-0.629766028	-0.705777083	-0.75663186	-0.834268024	-0.884801596	-0.926113027	-0.959655601	-0.97567975	-0.992542712	-1.002451085	-0.993902633	-0.973392673
0.100819702	0.202898954	0.284235903	0.381851215	0.474528398	0.55744653	0.641476061	0.717740767	0.783903114	0.833544517	0.894853337	0.917199822	0.959816288	0.989372235	0.996460776	1.001866539	0.999615529	0.984886389	0.953130797	0.919094056	0.884128797	0.836809044	0.774767221	0.707386729	0.634574921	0.570598694	0.480867497	0.378034293	0.283392058	0.200548865	0.097267199	-0.00651142	-0.089807801	-0.201820954	-0.283914445	-0.388869568	-0.465998973	-0.547545247	-0.623739431	-0.710358983	-0.769809345	-0.842845731	-0.872669533	-0.924800479	-0.94346481	-0.99536327	-0.99533401	-1.003736163	-0.998820848	-0.993742449
0.104816222	0.192020611	0.292017513	0.384799525	0.46729944	0.56306141	0.637234907	0.692786912	0.763899807	0.83094736	0.88162879	0.930745523	0.960717619	0.972726635	1.000093637	0.982303437	0.977321271	1.000711066	0.967070588	0.928275916	0.878352848	0.831043911	0.775500542	0.708616326	0.480331851	0.569765069	0.495147789	0.390123014	0.301913747	0.191083179	0.103351427	-0.009424954	-0.089403125	-0.193745404	-0.287820637	-0.384803066	-0.454340268	-0.548906066	-0.634483272	-0.694960156	-0.776923326	-0.842511099	-0.884836145	-0.919195008	-0.952722425	-0.985487982	-0.983100557	-1.01269271	-0.991399979	-0.98244366
0.109914901	0.201199745	0.287623515	0.388748429	0.475618009	0.565916476	0.63482414	0.719895941	0.78478511	0.852126804	0.915210943	0.942312185	0.970736413	1.017345736	1.012890818	1.034197694	1.026506866	1.009458717	0.989276449	0.968920535	0.918378405	0.877086561	0.811281985	0.746108966	0.669127352	0.590715618	0.493874079	0.401704448	0.311349604	0.20805548	0.110477801	-0.00925457	-0.109316609	-0.206026089	-0.301601595	-0.409683892	-0.510775159	-0.586702551	-0.68281893	-0.752164664	-0.820011999	-0.885463363	-0.945100918	-0.994629054	-1.022963575	-1.051791456	-1.05752327	-1.0843524	-1.066637933	-1.051395259
0.096146732	0.190501491	0.290724024	0.383791454	0.47334919	0.566444068	0.643506252	0.716607506	0.775572685	0.821949123	0.882274752	0.935376282	0.96573513	0.985420848	0.991535438	1.00285528	0.995418773	0.986296196	0.956899946	0.92232339	0.885136142	0.826193862	0.761272863	0.704851679	0.641270719	0.545356531	0.483762349	0.394642126	0.28978739	0.203377273	0.104016842	0.00635872	-0.101841274	-0.182812328	-0.271694918	-0.385060652	-0.453970613	-0.558497061	-0.626038288	-0.707282298	-0.780064395	-0.84317284	-0.87966841	-0.928975881	-0.939003207	-0.984262556	-0.997424958	-1.004516369	-0.988119689	-0.974101386
0.069909497	0.223182245	0.427034269	0.605014494	0.660286783	0.586860498	0.407522783	0.311074538	0.504878123	0.694278718	0.817925937	0.803451033	0.725867143	0.658409711	0.644723387	0.644049414	0.63943806	0.647237818	0.725307752	0.809597058	0.811291472	0.710193821	0.493195162	0.327377405	0.404304801	0.58208186	0.656674241	0.60202083	0.441584966	0.222985519	0.062720386	-0.001354014	-0.067909078	-0.232021599	-0.429706202	-0.602356024	-0.658324076	-0.593768889	-0.413328802	-0.320301066	-0.487586233	-0.705756227	-0.813771113	-0.810267884	-0.727888271	-0.654463778	-0.63135312	-0.637985141	-0.634017019	-0.655278397
0.177373582	0.355442782	0.487129017	0.594056208	0.65607973	0.689877405	0.702042376	0.708023522	0.704873261	0.747787592	0.784486442	0.847260353	0.890187349	0.963408978	1.009588179	1.024519317	1.005076321	0.969443466	0.91214475	0.861121723	0.797837308	0.752592376	0.734250148	0.715300306	0.711455865	0.708575831	0.670991705	0.58892473	0.4893002	0.354153744	0.184323144	0.001955513	-0.180498627	-0.348387316	-0.473903416	-0.575122061	-0.635767014	-0.657466346	-0.674278149	-0.666176979	-0.658761958	-0.679661944	-0.707545351	-0.76195846	-0.812332319	-0.872643922	-0.884617724	-0.9122382	-0.898595642	-0.865817778
0.100554283	0.185121529	0.291076306	0.381969091	0.47779892	0.555921832	0.635638049	0.725296806	0.786059145	0.852657779	0.898731674	0.938642946	0.970828376	0.992603362	1.02	1.021917478	1.038152006	1.007623612	0.979794877	0.95734797	0.918668058	0.846908594	0.796200497	0.724354229	0.67505936	0.584868704	0.487630637	0.399695635	0.305460757	0.214660656	0.109340155	0.010674795	-0.10505019	-0.202243236	-0.294985928	-0.402548532	-0.507090175	-0.588226338	-0.663701259	-0.755920325	-0.817209763	-0.877632107	-0.944632082	-0.985231808	-1.011184996	-1.047097382	-1.07795397	-1.06628982	-1.06851074	-1.066116406
0.073106702	0.252930998	0.467898229	0.648150075	0.716917699	0.639641814	0.469239031	0.399351577	0.577955745	0.802386302	0.92136031	0.925213465	0.863563112	0.798787898	0.776990388	0.793831347	0.782787148	0.802472664	0.85052535	0.922755722	0.924394419	0.806703946	0.57652897	0.398188179	0.462821968	0.627286318	0.720237768	0.653305946	0.466685723	0.255343235	0.069277076	0.003967786	-0.073566236	-0.235698631	-0.458878169	-0.640833874	-0.713437194	-0.643114821	-0.467022852	-0.398669954	-0.578655668	-0.795121879	-0.920859898	-0.929995189	-0.860352906	-0.797889138	-0.790475461	-0.79351422	-0.778321699	-0.797331652
0.045216941	0.162744054	0.302091139	0.452513608	0.535367343	0.531379518	0.474369967	0.365058254	0.246867142	0.18920314	0.188475335	0.28079072	0.417325824	0.561770721	0.678437045	0.722978114	0.677705507	0.565487277	0.419520123	0.288640703	0.202647332	0.18861713	0.245697888	0.362328788	0.481331345	0.542274593	0.537852264	0.450908917	0.309356886	0.154625627	0.039817044	0.001450566	-0.040166782	-0.15604436	-0.299984252	-0.44945612	-0.528141954	-0.539079284	-0.477738065	-0.375928756	-0.254537585	-0.190023406	-0.199758974	-0.27734851	-0.415359938	-0.57209243	-0.684341572	-0.731478342	-0.691937388	-0.567590303
0.105008844	0.19963868	0.272270254	0.385449	0.459102047	0.557582316	0.618135693	0.707368316	0.771634992	0.829524095	0.881760241	0.933378439	0.964079643	0.988062073	1.006498563	0.98656534	0.98994144	0.983198478	0.959256907	0.919035066	0.880488483	0.82607812	0.773443652	0.69787322	0.91832523	0.568660981	0.45874171	0.383081713	0.29343648	0.201346352	0.101302494	-0.0045324	-0.098232713	-0.194384562	-0.279328395	-0.379388066	-0.47009226	-0.553800065	-0.642076489	-0.708035161	-0.770471653	-0.828263629	-0.872469153	-0.915352533	-0.95677545	-0.986351936	-0.998308496	-0.996918795	-0.978421719	-0.989607887
0.193409604	0.350721941	0.486214153	0.584925446	0.64963452	0.676217695	0.694822681	0.713182845	0.718970608	0.751346941	0.789638546	0.839573714	0.90009913	0.971815022	1.005690059	1.03334481	1.007123573	0.978109009	0.905141915	0.866122182	0.798900207	0.773869406	0.737654441	0.719624444	0.71356559	0.703121614	0.66652555	0.597589544	0.500903596	0.35830934	0.195619218	-0.00613262	-0.176497451	-0.347503645	-0.47832763	-0.572005861	-0.633628727	-0.668669344	-0.670929231	-0.663034966	-0.664251229	-0.689599933	-0.737250187	-0.769546943	-0.811862357	-0.869382944	-0.898305663	-0.904928713	-0.894233827	-0.870168098
0.051967691	0.20603284	0.391849406	0.545011479	0.604704094	0.521517612	0.341551589	0.214111289	0.395802857	0.592471839	0.676826039	0.661482487	0.562134294	0.46366598	0.432999649	0.434047146	0.434170185	0.46669525	0.553528285	0.655064213	0.676943756	0.582064339	0.393931865	0.221352373	0.32761748	0.516522617	0.604037731	0.549902271	0.395914027	0.212262615	0.058820152	-0.001446041	-0.054640126	-0.209681253	-0.38852883	-0.545898211	-0.602337232	-0.519176291	-0.337367378	-0.212408203	-0.383950702	-0.578804224	-0.687134766	-0.662371108	-0.562148893	-0.475289933	-0.437183847	-0.434854876	-0.428207314	-0.463667332
0.094159769	0.189453753	0.287547402	0.378771002	0.474167219	0.560931854	0.624400008	0.707006581	0.772305883	0.822094649	0.878659682	0.934817338	0.936916501	0.972961011	1.000990527	1.000450541	1.003945828	0.971970399	0.965640426	0.929364478	0.872077283	0.841745558	0.768009076	0.724176864	1.067657285	0.55910904	0.466809105	0.379475579	0.302475426	0.207483917	0.106161154	0.002170874	-0.094618923	-0.205185317	-0.298692444	-0.364417948	-0.467146901	-0.562984425	-0.63895308	-0.711608253	-0.763901916	-0.836152911	-0.886574034	-0.918607261	-0.968677088	-0.978016849	-0.996327908	-0.99667133	-0.994699508	-0.985189783
0.107518851	0.186937711	0.286329958	0.388965907	0.477834086	0.562908131	0.648477665	0.720279467	0.787984988	0.850333292	0.901615438	0.937020047	0.982969457	0.993679411	1.020412777	1.034300174	1.025121568	1.009188027	0.992476527	0.955328229	0.918291005	0.862330251	0.811158216	0.74665724	0.662157022	0.584818716	0.488341072	0.403022177	0.314320313	0.198941752	0.108603	0.009479505	-0.107351637	-0.20697013	-0.318013407	-0.401519083	-0.502520728	-0.587356157	-0.683889812	-0.748943723	-0.832506031	-0.886598616	-0.943649925	-0.992996639	-1.032188537	-1.056931568	-1.069220468	-1.084359247	-1.079250575	-1.068339373
0.100909115	0.201735666	0.294368396	0.38657749	0.465602688	0.555759837	0.63441423	0.70984889	0.777349069	0.835491921	0.880991949	0.925996411	0.96077229	0.985349837	0.98907069	0.998598824	0.998509547	0.988312769	0.964694257	0.922407249	0.884573623	0.830138396	0.775849722	0.708386279	0.635894532	0.561116119	0.470953619	0.388833924	0.291283417	0.196016131	0.103879554	0.00694856	-0.090323134	-0.1957202	-0.287044771	-0.37729434	-0.471323235	-0.561043662	-0.632581561	-0.700231988	-0.774828453	-0.824371985	-0.886835692	-0.91752085	-0.951765312	-0.980265982	-0.988189892	-0.993655989	-1.000650277	-0.979503251
0.027852575	0.106842307	0.226893336	0.349220666	0.437886569	0.47214632	0.481384843	0.454348911	0.430910499	0.432267563	0.485095171	0.560544767	0.675327762	0.794983075	0.869579508	0.90406677	0.873661638	0.791797417	0.690764079	0.571328072	0.469817527	0.436866245	0.432679757	0.452045166	0.47909789	0.479420614	0.428266081	0.342984437	0.231861151	0.124343106	0.038452786	0.008777787	-0.023225343	-0.115351591	-0.22639759	-0.344257229	-0.432653703	-0.475251292	-0.484714885	-0.460382311	-0.435965648	-0.431570201	-0.482951019	-0.570925119	-0.686751141	-0.793054566	-0.887261526	-0.912114525	-0.874135894	-0.805095371
0.100941344	0.190507214	0.297607524	0.390361542	0.464612001	0.56029193	0.641010634	0.702030031	0.76678805	0.831657547	0.878762273	0.921873267	0.961111223	0.979189773	0.995849105	0.982683369	0.995644843	0.97474782	0.964110604	0.929853631	0.880383488	0.842067282	0.774758537	0.703491929	0.645777642	0.552590707	0.474320839	0.385005487	0.286944743	0.184074541	0.099435316	-0.007947719	-0.107463691	-0.206959541	-0.296894056	-0.375957434	-0.457381128	-0.554987735	-0.622577854	-0.700977184	-0.757152834	-0.839295815	-0.874435979	-0.92964626	-0.953864068	-0.988288477	-0.9906727	-0.991502779	-0.98996313	-0.973215876
0.086636919	0.187955259	0.291363195	0.393444775	0.462338607	0.553379005	0.633573899	0.709292421	0.778123765	0.843554403	0.888063412	0.946446612	0.971916209	1.005605805	1.004528478	1.019409935	1.015718737	0.999163531	0.963850425	0.952021789	0.900687778	0.857043153	0.807847004	0.727885884	0.664197723	0.57616109	0.481532892	0.398456001	0.303084216	0.206198253	0.103285293	0.012424802	-0.09108426	-0.204242784	-0.317911572	-0.379549604	-0.496518223	-0.587650896	-0.674851931	-0.732991392	-0.810346831	-0.877272418	-0.918495053	-0.95278036	-1.008213836	-1.026448779	-1.048341039	-1.053271248	-1.046012235	-1.040320118
0.090673693	0.204883026	0.286723301	0.386844464	0.456951933	0.559272956	0.633315909	0.704700203	0.768277602	0.833956033	0.881884842	0.930455349	0.969680759	0.990719085	0.997943158	0.99950654	0.991626448	0.981809914	0.950482258	0.922331914	0.877605104	0.838701698	0.788938091	0.694697924	0.643744218	0.558764392	0.480822479	0.383877204	0.285547878	0.186407187	0.100807765	0.000935271	-0.090606379	-0.198721559	-0.300041147	-0.375113678	-0.477380452	-0.556110105	-0.623834984	-0.708689985	-0.776998571	-0.827683634	-0.881248797	-0.9180915	-0.953676578	-0.987475863	-0.993343067	-1.002346627	-0.997970726	-0.984827077
0.105061322	0.198887432	0.285599936	0.378941472	0.469149347	0.560207233	0.636401538	0.697553867	0.768136074	0.829690662	0.882603713	0.921085043	0.956129104	0.985268216	0.993148227	0.998816544	0.998519323	0.969909182	0.956161101	0.931946054	0.888083639	0.829061416	0.772637266	0.698476045	0.638660118	0.562387326	0.471565287	0.387263586	0.295031492	0.187166662	0.094466578	0.011442203	-0.095988179	-0.185635344	-0.291163244	-0.3793441	-0.476839247	-0.555801885	-0.638496398	-0.702281352	-0.766334096	-0.837354615	-0.873373438	-0.926388152	-0.95106111	-0.984168236	-0.991513978	-1.007584973	-0.995399608	-0.980350422
0.098761294	0.196177244	0.293522008	0.380924269	0.465816573	0.552743667	0.646142409	0.717000674	0.769051547	0.822982996	0.884231527	0.907445787	0.95942848	0.988370522	1.000136548	1.021699797	0.98478638	0.993255463	0.963458418	0.930613329	0.899181559	0.830529155	0.77201664	0.716343363	0.634396353	0.562390826	0.472737901	0.367120138	0.299865144	0.202388275	0.113860522	-0.010420498	-0.100521618	-0.19284307	-0.295563454	-0.38869764	-0.45268983	-0.567400164	-0.633823511	-0.714360278	-0.786499503	-0.823199173	-0.86742993	-0.921338518	-0.968468269	-0.989849824	-1.006410793	-1.00136124	-0.995242353	-0.977824991
0.09382848	0.195653971	0.287417792	0.384184135	0.469895312	0.552162417	0.633652134	0.703162869	0.774485937	0.83404049	0.886347542	0.919437125	0.956921006	0.982080024	0.999144678	0.997990136	0.997626746	0.98110909	0.949803851	0.920129406	0.868639594	0.829784204	0.775667135	0.71171125	0.633194642	0.550866225	0.472642841	0.389096666	0.299030414	0.200809475	0.104932088	0.005988748	-0.100586279	-0.194601906	-0.294585085	-0.377776886	-0.465118661	-0.554320171	-0.637659374	-0.712341088	-0.766973095	-0.833671154	-0.887515775	-0.926157765	-0.953132613	-0.986082897	-0.992696988	-1.00300143	-0.99453384	-0.987603159
0.232378372	0.445330438	0.549407868	0.609216924	0.597713034	0.577789795	0.583193353	0.622196114	0.708160511	0.787129219	0.880311122	0.927200187	0.938457786	0.917337302	0.883789671	0.879747669	0.89626826	0.906601682	0.922729018	0.935493665	0.882653709	0.798288759	0.707722417	0.625053235	0.58324306	0.595674898	0.609289056	0.628506926	0.56970311	0.437788981	0.231203577	-0.007605149	-0.242261441	-0.438723083	-0.552565302	-0.595253642	-0.59450885	-0.585161079	-0.583861197	-0.619997165	-0.69016091	-0.794802833	-0.880938687	-0.932569366	-0.931745051	-0.917617021	-0.885571433	-0.882492217	-0.884238903	-0.92327686
0.090066781	0.181426338	0.280504991	0.373814703	0.471857528	0.556896131	0.637886522	0.717535603	0.772532937	0.841109276	0.879899639	0.910399856	0.966184766	0.978938399	1.003086815	0.995608856	0.99610682	0.970568563	0.946267717	0.927634968	0.876940124	0.83396138	0.776809708	0.715940924	0.628577929	0.554428909	0.47051943	0.370010721	0.296175235	0.203413747	0.107978788	-0.004279995	-0.082595463	-0.186477056	-0.293783153	-0.369569251	-0.466679954	-0.572007272	-0.640683171	-0.715537855	-0.768905707	-0.824713669	-0.883956253	-0.915463239	-0.956911639	-0.973728098	-1.002690265	-1.005143146	-1.004166142	-0.992668458
0.095137751	0.185421421	0.283417203	0.386129252	0.476395504	0.561838238	0.631236141	0.713401203	0.791598455	0.854848366	0.883664281	0.938762267	0.987080909	1.002194992	1.030614733	1.035322524	1.03586829	1.012302422	0.988885797	0.959688776	0.920228234	0.865945468	0.82184455	0.745088654	0.659846064	0.599712345	0.483029371	0.402642343	0.304089765	0.207382261	0.107270965	-0.006197471	-0.101534674	-0.196809222	-0.306499267	-0.39851742	-0.48952994	-0.601149072	-0.68434451	-0.757975651	-0.826881477	-0.899004152	-0.944978747	-1.001480498	-1.026947108	-1.063108352	-1.073743712	-1.084156368	-1.080732455	-1.067902209
0.100311772	0.210101569	0.293378296	0.382570946	0.481568262	0.557954512	0.632958729	0.690923678	0.770548651	0.827490188	0.877000867	0.924830749	0.947195121	0.978029328	0.981397242	1.007737377	0.975954761	0.982207045	0.961899312	0.940173907	0.882833579	0.838482917	0.762989698	0.700213039	0.443854406	0.568836484	0.46819366	0.372831752	0.282005085	0.192522581	0.100948089	0.000702874	-0.10483014	-0.196551236	-0.281230855	-0.387283341	-0.47568287	-0.544270768	-0.635843333	-0.711561078	-0.769078389	-0.8247883	-0.889882571	-0.925752886	-0.944163099	-0.987325539	-1.012597546	-1.003528907	-0.987527821	-0.978286695
0.092293315	0.192149861	0.2852057	0.387318664	0.473731859	0.549044997	0.634269539	0.694775467	0.780839511	0.837718453	0.87668879	0.950866463	0.950715255	0.970312762	1.004055606	1.004756717	0.98991671	0.982584608	0.943032696	0.927090566	0.876746683	0.842269876	0.766732836	0.712053103	0.489298734	0.551467199	0.47047809	0.371102488	0.300405541	0.192117639	0.096761372	0.012261162	-0.094750644	-0.197486476	-0.287221067	-0.387598272	-0.452375925	-0.553521814	-0.632547624	-0.698028851	-0.767550072	-0.813272935	-0.882487421	-0.922226161	-0.948493058	-0.966758992	-0.988555083	-1.000404773	-1.002397491	-0.977139642
0.080157696	0.206153678	0.280843002	0.39965999	0.461553443	0.559078906	0.63943262	0.701273804	0.783564842	0.824775792	0.887515424	0.918823856	0.962062192	0.988975648	0.995438868	0.98997246	1.013741428	0.98340075	0.966581208	0.92110123	0.874365572	0.829081474	0.765629863	0.701852974	0.651014376	0.561501209	0.479527262	0.366351389	0.268386531	0.192895127	0.111157876	-0.008867616	-0.090263026	-0.19254396	-0.289593761	-0.382829153	-0.482008915	-0.555394472	-0.621576143	-0.713780473	-0.774047044	-0.826878817	-0.901595767	-0.915321028	-0.963858107	-0.990136892	-1.008207071	-0.993163061	-0.986875538	-0.997462608
0.029863955	0.127775941	0.239047014	0.351118777	0.438436578	0.475724721	0.479331849	0.449334657	0.424187736	0.413741547	0.454444206	0.549734729	0.659322308	0.784433225	0.870893654	0.896013205	0.862933438	0.773737083	0.65600548	0.536971894	0.453654803	0.410871365	0.420118744	0.446378654	0.480509574	0.474092635	0.445239401	0.35361191	0.240653378	0.12174785	0.035169639	-0.005268166	-0.028212073	-0.107080124	-0.23787667	-0.350947783	-0.433262127	-0.481663875	-0.482585742	-0.442235085	-0.422357156	-0.408903341	-0.457232022	-0.537349415	-0.656076159	-0.781760814	-0.859836036	-0.892240427	-0.866406789	-0.78950176
0.198782254	0.374876431	0.520999143	0.632816379	0.677661055	0.710115477	0.701628192	0.701089214	0.701537225	0.723800903	0.767589065	0.836655762	0.888008571	0.943584218	0.997277835	1.013506579	1.010198702	0.947964078	0.910874971	0.833503107	0.787403335	0.745761247	0.714975791	0.719775924	0.709334506	0.717224996	0.698113372	0.630621989	0.522632942	0.372630835	0.195669155	0.002931354	-0.204608793	-0.370479233	-0.50816795	-0.607275657	-0.659292159	-0.679827483	-0.669050211	-0.665384911	-0.656516434	-0.680897453	-0.710847813	-0.749529255	-0.81144556	-0.861196598	-0.874808226	-0.915007088	-0.879623258	-0.846903196
0.101070222	0.197450983	0.289712992	0.385802825	0.486222698	0.563762609	0.636779116	0.714686734	0.786649228	0.848606968	0.897587711	0.942101389	0.990825975	1.010148585	1.015330206	1.026146641	1.032679127	1.013281344	0.988077148	0.955551845	0.91723842	0.861144577	0.799731737	0.747924021	0.670413271	0.580398522	0.493914085	0.402120413	0.309773026	0.211865047	0.107383252	0.001206413	-0.106335964	-0.209456004	-0.317524796	-0.405198729	-0.512086954	-0.594961663	-0.675325706	-0.762346407	-0.824752739	-0.888378066	-0.942823115	-0.990221303	-1.021218411	-1.051166135	-1.073872315	-1.082975193	-1.081795755	-1.058363722
-0.826140539	-0.72917227	0.329816121	-0.740536341	1.524475278	1.467896952	1.102761608	1.281327065	0.135913362	1.30265615	-0.770030264	5.040005101	1.004204209	4.289270268	0.742731582	-0.545443176	-1.36713282	1.482597021	-0.344328561	-0.168145394	1.570192097	-1.372410802	1.411348897	0.377902187	-0.246277659	-2.671300881	1.181173982	1.577100458	-1.32550566	-0.121618657	0.300922354	-0.613730713	-2.404302292	2.785006577	-0.993217021	1.212203116	0.02918856	0.460862955	2.690661513	-0.084923681	-1.591035603	-0.377727904	-2.679395466	1.80784351	0.488165055	-1.878224116	0.507944686	-1.01724733	-1.093743887	0.858373831
1.014413756	0.092460748	-0.141077362	1.369686757	1.001689208	0.039994175	0.525493175	3.187537121	-0.600997495	2.782934106	0.002705348	-0.482282076	-0.232808214	0.23368219	0.22494793	1.82894118	0.008370929	-1.13953454	0.955145912	2.238316162	-0.006984071	0.516858036	1.642285502	1.151205934	1.21571268	1.403153798	1.379205156	-0.589262732	-0.492162379	1.022682247	0.940544705	-0.062399535	0.100487076	-0.194306213	0.269372359	0.281902852	0.334228036	-0.898392836	0.333308185	0.484281171	-1.492485624	-1.051950298	-0.012602942	-1.041411625	-1.798291563	-0.034361575	0.556948378	-1.667223795	-2.370058901	-1.715891751
0.188618131	0.368269481	0.487613586	0.604329081	0.669056876	0.695374654	0.706880548	0.712414357	0.69927546	0.735671841	0.784112765	0.822679007	0.899998605	0.95306015	0.994013396	1.016921934	0.994879555	0.961486064	0.920019807	0.835847513	0.785959178	0.751154901	0.729951583	0.721578619	0.722824469	0.713407076	0.681572804	0.615261829	0.520715275	0.392107593	0.194851684	0.0023013	-0.184640579	-0.350160211	-0.479543115	-0.583374818	-0.648021384	-0.667399519	-0.662159578	-0.65535833	-0.677114846	-0.681154233	-0.711170794	-0.754168319	-0.814021691	-0.862129158	-0.885775114	-0.908932322	-0.895850995	-0.865973312
0.101828662	0.199727991	0.290629648	0.387421223	0.468512913	0.565196145	0.649913271	0.70069064	0.781637343	0.850884157	0.905460007	0.942673127	0.970451726	0.99640276	1.020407285	1.03399936	1.017091321	1.021926747	0.982204509	0.955582415	0.920801223	0.885084487	0.818096985	0.735983279	0.6628314	0.587197474	0.498527313	0.403502458	0.314143532	0.208913632	0.123693532	-0.002041238	-0.103865335	-0.206129256	-0.306399744	-0.414777287	-0.508686215	-0.606982749	-0.669408206	-0.750916028	-0.827195859	-0.883820178	-0.941849396	-0.98747838	-1.023996113	-1.06337634	-1.078391847	-1.090731783	-1.073195887	-1.061683166
0.107620651	0.182996721	0.317708287	0.404572412	0.484842817	0.565568293	0.657240307	0.704549204	0.785911588	0.858587892	0.895849985	0.948759914	1.009001055	1.023388673	1.03133824	1.012459366	1.041806126	1.013203375	0.989235413	0.949262952	0.913012716	0.862307883	0.824055641	0.76451019	0.67073305	0.607110535	0.492223584	0.390749536	0.321516016	0.203605243	0.107068714	0.001639898	-0.088223212	-0.204116983	-0.314722329	-0.398773886	-0.503956303	-0.577539327	-0.68359557	-0.745001595	-0.833571122	-0.906709158	-0.937144552	-1.001147301	-1.045898004	-1.07070371	-1.057061558	-1.075798168	-1.080868586	-1.060723665
0.08064149	0.197815219	0.29610038	0.384551979	0.474453787	0.56616708	0.650352733	0.70768919	0.787937692	0.823699275	0.907864974	0.942546998	0.985416361	1.010767269	1.025404769	1.017750112	1.021122025	1.024010998	1.016659478	0.943880902	0.918327248	0.865230663	0.818715537	0.740927841	0.682470208	0.577558746	0.500096291	0.403538698	0.298622965	0.207757824	0.10323899	-0.002035085	-0.098919053	-0.193686624	-0.296688683	-0.38691896	-0.481390297	-0.597535681	-0.676973248	-0.775023828	-0.818220769	-0.869405855	-0.943431472	-0.989795654	-1.030332639	-1.060935011	-1.067189528	-1.071599433	-1.088148691	-1.06861781
0.099279742	0.19408202	0.291830482	0.383282858	0.47951601	0.559572462	0.62580838	0.707338012	0.768315024	0.83320767	0.883067441	0.927553568	0.960682421	0.977201657	0.988189649	1.001180971	0.985971743	0.97897092	0.957762266	0.92774585	0.87423968	0.834473357	0.765158025	0.712593667	0.640884164	0.555765635	0.467649219	0.383845794	0.295675242	0.197155517	0.098445527	-0.000491848	-0.097357323	-0.200649291	-0.295169494	-0.374605987	-0.477782411	-0.554674205	-0.629585648	-0.698979806	-0.763304906	-0.830024694	-0.879112083	-0.924025998	-0.953789338	-0.982360671	-1.000348526	-1.000518947	-0.995888044	-0.974831807
0.254459182	0.477798549	0.605327079	0.632650082	0.625579216	0.588447087	0.563996311	0.607845157	0.682830816	0.789668999	0.868103182	0.916425494	0.936599535	0.883055469	0.866576385	0.853762375	0.86114796	0.904065563	0.91681852	0.921265793	0.868303044	0.779400288	0.670262682	0.598937272	0.560875905	0.585704602	0.619582743	0.640256557	0.611108382	0.484958273	0.259414778	0.010329132	-0.245776832	-0.472558779	-0.625476785	-0.643410524	-0.627456845	-0.579573645	-0.576363584	-0.595488095	-0.681676231	-0.786898261	-0.880092719	-0.916025635	-0.919174403	-0.897585752	-0.86976577	-0.855640735	-0.873593391	-0.893207148
0.119006523	0.199317121	0.302781646	0.395062966	0.45919804	0.553913186	0.62662474	0.699179401	0.769028846	0.826777844	0.879035075	0.919334669	0.950456357	0.986553885	0.990985605	0.997085896	0.998883019	0.974570474	0.964095097	0.935501776	0.888690504	0.849888911	0.768444151	0.702320503	0.638557613	0.549647539	0.463638645	0.37703648	0.279628024	0.185162496	0.0898506	0.008695262	-0.092041257	-0.189383212	-0.291391396	-0.38288955	-0.480746181	-0.559455688	-0.639867434	-0.715709112	-0.772036511	-0.824211251	-0.87366438	-0.929309348	-0.964714313	-0.972866608	-0.990883016	-1.009682748	-0.996267429	-0.987023721
0.092018064	0.182393898	0.287737374	0.391576519	0.479272102	0.558170075	0.628449071	0.721413764	0.790089811	0.854005387	0.899690063	0.928980773	0.976318345	1.004510521	1.036481233	1.042050705	1.036566911	1.009594167	0.990142142	0.95917009	0.911253049	0.861296125	0.804847126	0.73984673	0.664568697	0.579886146	0.496932384	0.385323528	0.310026406	0.196330902	0.104083059	-9.85E-05	-0.111120855	-0.20296489	-0.315254273	-0.410453103	-0.506116545	-0.588102632	-0.6813122	-0.7483709	-0.821158755	-0.889651667	-0.95470577	-0.996183616	-1.028666936	-1.051487817	-1.076040064	-1.078672172	-1.06704963	-1.073809328
-1.197575855	0.150830215	-1.483655629	0.406164774	1.639807579	1.930288109	2.290881053	1.917912772	-0.238638131	0.927639716	1.926624838	2.338152414	0.959091494	-0.086378961	1.665814376	1.458892318	-0.161550217	0.142722256	1.089915017	1.221821928	-0.137458655	0.112018673	0.915106901	-2.061886154	2.374873142	-0.08497471	1.430404611	-2.338137749	1.243552235	0.187811682	1.117805585	0.510443378	-0.541987108	-1.633687902	-3.209905324	-1.7425688	0.406992902	-1.852388922	-2.1770701	-1.743875356	-3.359483953	-0.405447331	0.271642799	2.036028318	0.091241672	-1.527522791	-0.189136199	-0.747032357	-1.823871753	-0.325054674
0.070664566	0.256975625	0.496596049	0.677342354	0.752439993	0.680165106	0.497171568	0.437125489	0.637837446	0.862636022	1.001779427	1.006874739	0.944530022	0.885518971	0.881411062	0.882643228	0.879926239	0.890327017	0.942675719	1.007138129	0.996890696	0.878402569	0.633527407	0.44887853	0.496450586	0.679984665	0.752969373	0.685167876	0.496178698	0.267994029	0.066863307	0.00161228	-0.079835665	-0.259830271	-0.494518133	-0.6816374	-0.757612625	-0.677950011	-0.515111065	-0.43676416	-0.636251016	-0.858888851	-0.987332985	-1.01217323	-0.933907949	-0.882079881	-0.872581027	-0.881766893	-0.879880882	-0.883288731
0.109508694	0.197354742	0.30063183	0.393902419	0.475631891	0.561400566	0.638993047	0.698488712	0.761916367	0.836825986	0.889162059	0.930703159	0.947386868	0.989652608	0.995039659	0.987597803	1.007413047	0.989180866	0.949591868	0.905844578	0.885248686	0.826168183	0.7648069	0.715915806	0.630415234	0.552014033	0.463283783	0.383912048	0.294783456	0.199987624	0.125112797	0.005563757	-0.091269105	-0.191036719	-0.273398165	-0.379714839	-0.468519452	-0.550903156	-0.631688296	-0.708158054	-0.777723211	-0.845313251	-0.881157294	-0.910916624	-0.948661445	-0.977625155	-0.990392896	-0.994565969	-0.996684334	-0.961930794
0.251573366	0.45859337	0.580756175	0.628036528	0.614550514	0.573627712	0.577226498	0.619449941	0.690707527	0.784385533	0.876720075	0.926843564	0.937600556	0.913923342	0.884165914	0.868058834	0.881359323	0.909003916	0.930653664	0.932662081	0.877786649	0.78939023	0.685096345	0.608525365	0.588013111	0.584707575	0.625936478	0.638573889	0.590926401	0.476552949	0.260866768	0.008816752	-0.251764318	-0.455371687	-0.584116764	-0.626519449	-0.608906162	-0.593605858	-0.582864744	-0.626371442	-0.696332635	-0.79295637	-0.874921075	-0.933315083	-0.9287154	-0.913884195	-0.885521154	-0.862814355	-0.882447568	-0.909654822
0.084046176	0.183857881	0.297142158	0.387534189	0.472470323	0.562730065	0.648005381	0.729237831	0.782048934	0.842081291	0.896820917	0.946633994	0.97851174	1.019651696	1.02913427	1.037579968	1.019894045	1.014613983	0.996844243	0.975067598	0.912585224	0.872062265	0.80051778	0.740984462	0.662344275	0.563793998	0.496464227	0.402612386	0.2978216	0.211601318	0.106114692	0.010136013	-0.120111112	-0.205609435	-0.308817593	-0.403447913	-0.485787492	-0.577105979	-0.687804128	-0.759636142	-0.835913262	-0.884636995	-0.946502483	-0.993311679	-1.012807033	-1.055153261	-1.078161807	-1.086223078	-1.072582187	-1.063369083
0.051287206	0.177662607	0.349593384	0.487523464	0.575691624	0.550636504	0.452486331	0.294458353	0.13495297	0.028459611	0.013223869	0.093522986	0.241235726	0.4052118	0.537216997	0.579912866	0.535296888	0.407204076	0.23867142	0.096853432	0.011075482	0.024870257	0.134003709	0.293799285	0.448742795	0.555662086	0.571954246	0.492510432	0.348370545	0.178503342	0.045925214	-0.000764406	-0.0459234	-0.17596923	-0.343231706	-0.492995044	-0.565661834	-0.557283568	-0.456342138	-0.300852215	-0.132940771	-0.031005275	-0.016320914	-0.091427474	-0.240678603	-0.407597782	-0.530495401	-0.58799891	-0.542734705	-0.413818552
0.100641732	0.190241381	0.288155465	0.383852717	0.467969058	0.567849501	0.636561294	0.715321118	0.77206673	0.820852237	0.880968429	0.93236162	0.948457391	0.976421484	1.006751827	1.003930201	0.986889943	0.975646694	0.945483167	0.932513417	0.875607498	0.828774823	0.780212496	0.713563531	0.626134073	0.566617852	0.473349325	0.389341453	0.284053665	0.200465978	0.091587284	0.005151435	-0.097890583	-0.198779571	-0.293442634	-0.389610611	-0.472304346	-0.564208031	-0.627701887	-0.71336807	-0.769044807	-0.821767405	-0.892827556	-0.919907938	-0.954382291	-0.980679195	-1.003302678	-0.995316945	-0.993210041	-0.96759932
0.076834009	0.253681396	0.496018142	0.669181064	0.754112247	0.682062003	0.508833938	0.446792526	0.64128911	0.878756833	0.998470797	1.017150087	0.960295477	0.892718484	0.88278385	0.892275248	0.899092551	0.894258584	0.962349358	1.014398691	1.01735147	0.883377914	0.651758992	0.446637898	0.501796561	0.674516848	0.758014043	0.67707954	0.492107341	0.261104628	0.076683819	0.004914147	-0.067941906	-0.262053764	-0.493794551	-0.682422122	-0.757487263	-0.672291898	-0.507314586	-0.435678672	-0.644156906	-0.864667534	-1.003713643	-1.014349886	-0.955025547	-0.897816349	-0.89134886	-0.887979145	-0.885410287	-0.894563211
0.094415419	0.20321192	0.287365006	0.381386642	0.472218698	0.553338645	0.634610102	0.707218676	0.764565966	0.843332036	0.8763605	0.917996611	0.962541607	0.977981641	0.996620742	0.990568544	0.997098676	0.981319556	0.960453057	0.931592891	0.887294749	0.837609602	0.774174054	0.707896977	0.635016381	0.552028915	0.468026545	0.377236769	0.292236047	0.195276582	0.1065852	0.004434694	-0.100875823	-0.190019031	-0.279196233	-0.383598951	-0.472906668	-0.562019199	-0.632145065	-0.706736469	-0.772005708	-0.836192465	-0.879896138	-0.921172827	-0.956657323	-0.974393798	-0.988985154	-0.991665905	-1.006340829	-0.986546011
0.061962842	0.260649405	0.480261667	0.677794404	0.749855464	0.678739715	0.491299285	0.431306589	0.624403321	0.856804669	0.98682293	1.001837424	0.941827618	0.875691976	0.86858468	0.877537117	0.861183176	0.870886491	0.92298953	0.991937397	0.994556772	0.858286688	0.628778419	0.434971234	0.484066899	0.675085695	0.74505191	0.673947286	0.489783998	0.260637356	0.067598454	0.000432828	-0.070461145	-0.242185941	-0.49022359	-0.669649511	-0.739299809	-0.67353482	-0.501661747	-0.433175952	-0.628530568	-0.851673405	-0.989950558	-0.99758449	-0.930965465	-0.873620893	-0.856778964	-0.868096466	-0.858878028	-0.886788655
0.101535301	0.183933795	0.292516407	0.37812484	0.469048958	0.570911788	0.647254293	0.724328166	0.791863326	0.851529525	0.91011582	0.939413699	0.9826907	1.00895261	1.03147952	1.020802284	1.036468735	1.010740636	0.984631331	0.966815225	0.926370453	0.854733401	0.802616288	0.743732732	0.661993566	0.575521946	0.49326015	0.412060365	0.306445661	0.20377139	0.094526707	-0.00723432	-0.108032591	-0.204597994	-0.306047321	-0.413507853	-0.497230369	-0.601722148	-0.677496144	-0.762293103	-0.828430326	-0.883475952	-0.951346645	-0.987885704	-1.020260262	-1.048721501	-1.079571707	-1.084143242	-1.076078372	-1.050706951
0.018175735	0.099279731	0.201137142	0.319982448	0.398839195	0.453341138	0.46871783	0.466556097	0.469530515	0.480311873	0.53764674	0.624600372	0.733582924	0.825725183	0.902355894	0.945862393	0.912427323	0.839246795	0.723731876	0.622006538	0.533918824	0.488163106	0.462313765	0.474661585	0.468329526	0.459771739	0.407068992	0.320585904	0.206548614	0.099838738	0.027035626	0.002178973	-0.023666126	-0.101456447	-0.200353848	-0.307452561	-0.394852714	-0.453278908	-0.471652883	-0.468008641	-0.469479332	-0.484102988	-0.527830281	-0.612116395	-0.722989037	-0.827943183	-0.90571133	-0.928284708	-0.918350966	-0.836239906
0.112608804	0.19856541	0.285644466	0.400132252	0.476183623	0.563432819	0.631648386	0.705380942	0.777811091	0.828249969	0.87852187	0.913806096	0.964847069	0.986763159	0.985059549	1.005650659	0.985111281	1.002143115	0.956307489	0.916468403	0.872138708	0.827406117	0.777209924	0.698928475	0.374892373	0.558281933	0.476787598	0.386048834	0.289673843	0.182566502	0.10235497	0.004110032	-0.102395453	-0.19790913	-0.295632524	-0.3837884	-0.466794857	-0.551894415	-0.641568075	-0.693454939	-0.758769681	-0.838207984	-0.883534557	-0.923947456	-0.953244077	-0.978808626	-0.991232347	-0.998083712	-1.004294757	-0.966787255
0.262218244	0.460679746	0.583264342	0.620743756	0.604779378	0.592053294	0.568558695	0.617283288	0.691296606	0.800103256	0.874896823	0.917411899	0.929994884	0.909952358	0.881643496	0.86761361	0.869962651	0.899792876	0.930901998	0.92813586	0.873675905	0.779686165	0.692686426	0.613193812	0.57609265	0.574715754	0.618020358	0.624409299	0.584223679	0.461620903	0.256173812	0.000534296	-0.253403461	-0.463760291	-0.586338368	-0.636548483	-0.611362116	-0.598445096	-0.560767704	-0.608545563	-0.693653312	-0.779228719	-0.861926454	-0.920902676	-0.925883553	-0.903432332	-0.86943001	-0.859121622	-0.875687788	-0.911632948
0.102650729	0.179161524	0.298373078	0.370544691	0.469539363	0.546848972	0.625526123	0.705550919	0.765199375	0.838854805	0.882551689	0.930355124	0.960219973	0.987906769	0.993963708	1.001134035	0.984221774	0.979550655	0.961188073	0.922526566	0.888163904	0.831835968	0.770303452	0.716202664	0.628812717	0.550293088	0.467060973	0.372810897	0.284547555	0.192625854	0.103495185	-0.006620244	-0.089920935	-0.190957734	-0.29368478	-0.382581566	-0.475281535	-0.551013232	-0.63698984	-0.707712661	-0.763473236	-0.827935928	-0.877879299	-0.938995124	-0.957816514	-0.985907651	-0.9953881	-1.004302305	-0.988106743	-0.98579984
0.086891556	0.195203625	0.300353695	0.396355476	0.475926619	0.556899215	0.632697955	0.727473763	0.77939767	0.852463825	0.902464215	0.947781186	1.001433345	1.006160624	1.018675138	1.033897515	1.044910494	1.014364098	0.983418446	0.955410623	0.904854197	0.870037644	0.809746625	0.744854771	0.672238412	0.589211431	0.500168487	0.399932983	0.304193937	0.204419646	0.094990923	-0.014798008	-0.100643712	-0.195435689	-0.302667305	-0.415589016	-0.497538032	-0.586184825	-0.684693639	-0.751562479	-0.828892226	-0.895391495	-0.958482801	-0.996120009	-1.020765243	-1.056192602	-1.076006689	-1.070648458	-1.089998244	-1.058220819
0.101308063	0.198461911	0.289133164	0.379192553	0.48366628	0.559261352	0.641943302	0.699487747	0.770836402	0.826759533	0.875513833	0.92493825	0.963212	0.981733272	0.989594382	0.995985969	1.001437391	0.978734581	0.96265293	0.921257154	0.880936974	0.838200961	0.76570508	0.712787336	0.638013938	0.551178299	0.465602607	0.386212417	0.284537593	0.199431047	0.108336358	-0.010192133	-0.104458668	-0.191873153	-0.283170506	-0.381425278	-0.469569464	-0.555716563	-0.63780215	-0.708371768	-0.764583712	-0.827696326	-0.866192786	-0.923142039	-0.947643329	-0.98948861	-0.991243017	-1.001115806	-0.999450982	-0.980362565
0.213201753	0.37807052	0.503162271	0.551560715	0.57481866	0.584235908	0.59563488	0.653625767	0.717976509	0.798516992	0.882299619	0.918971711	0.947412708	0.93877846	0.931595795	0.909405276	0.931406296	0.93521161	0.952726837	0.933380502	0.876976485	0.802998971	0.724228274	0.644509553	0.598239921	0.580620685	0.564664332	0.5642687	0.497449733	0.378839039	0.194549684	-0.009127151	-0.209210241	-0.377165866	-0.500352268	-0.555902057	-0.563556183	-0.586068883	-0.600450428	-0.645029087	-0.712267438	-0.797400495	-0.886965435	-0.927336946	-0.941958547	-0.925806644	-0.92410282	-0.909005922	-0.918026493	-0.932446209
0.091940576	0.184432486	0.305351347	0.40094264	0.475737256	0.572000322	0.656537972	0.715282559	0.793740072	0.857315094	0.888493909	0.963605369	0.968748134	0.994239556	1.011244007	1.040698102	1.030923638	1.028135042	0.983038465	0.956835433	0.912695641	0.86858098	0.801685407	0.738476239	0.678288546	0.602794758	0.496579278	0.40298996	0.308329662	0.200955989	0.115048148	-0.0103414	-0.109743431	-0.21027024	-0.311829289	-0.413813035	-0.492676875	-0.579796576	-0.66117533	-0.75540845	-0.813784892	-0.890589641	-0.947065809	-0.994060046	-1.020834761	-1.060787619	-1.056688209	-1.064907003	-1.07722893	-1.063532813
0.188506868	0.372886262	0.511147865	0.623199506	0.693014155	0.709619036	0.707472741	0.705097577	0.701825229	0.723543646	0.74655173	0.813332419	0.874968887	0.951435717	0.988750007	1.014172375	0.999306032	0.963982	0.896682236	0.828990412	0.783689028	0.73362166	0.730004586	0.718017816	0.725679649	0.718422238	0.701609124	0.646176463	0.529333356	0.394973591	0.203068483	0.000626944	-0.192907043	-0.370075551	-0.512942164	-0.609021609	-0.675650438	-0.68406544	-0.665034079	-0.64940293	-0.666782639	-0.68112047	-0.703586746	-0.753024213	-0.796263844	-0.845728772	-0.887438253	-0.897882678	-0.8993696	-0.837791308
0.088593455	0.193357668	0.297446335	0.393174151	0.465446357	0.539713253	0.634175013	0.708940472	0.7813052	0.839695825	0.892589158	0.942433165	0.973827587	0.992729522	1.017349081	1.021215466	1.029438627	1.012049287	0.980893629	0.957849425	0.930234345	0.855284523	0.799740574	0.747815369	0.653338477	0.570971398	0.500126379	0.406722284	0.31094876	0.20234413	0.102440671	-0.003898629	-0.103573517	-0.202194383	-0.302176367	-0.410872585	-0.496890058	-0.589215609	-0.673349826	-0.746065569	-0.827441527	-0.890723934	-0.951798536	-0.989264678	-1.026937261	-1.059989826	-1.090167185	-1.081301673	-1.079250507	-1.079929542
0.053364896	0.236580204	0.43655453	0.618299762	0.666405595	0.58361496	0.407592973	0.335573447	0.517284105	0.725111867	0.836618935	0.831453435	0.745989934	0.690004533	0.645881664	0.672484636	0.667983634	0.685123514	0.742352585	0.836362217	0.828689878	0.712520409	0.51420719	0.343622639	0.414249942	0.59672698	0.660864245	0.610710073	0.439030855	0.23098173	0.075948319	0.010714894	-0.065526101	-0.222688682	-0.430867194	-0.603168343	-0.660797327	-0.596906283	-0.42083176	-0.319950136	-0.519107251	-0.732308973	-0.836453989	-0.829931656	-0.74490796	-0.695246516	-0.658581729	-0.669762113	-0.656008357	-0.678217709
0.0413459	0.1598737	0.321129408	0.460442465	0.541230008	0.54110307	0.46732564	0.347817607	0.226649365	0.154496395	0.144134724	0.237325623	0.374535695	0.528288021	0.648404677	0.695406039	0.664350852	0.539992871	0.382408459	0.233546742	0.148216133	0.152310108	0.215747017	0.346767872	0.475577487	0.542724634	0.534784006	0.456092192	0.323246221	0.166644788	0.042192923	-0.002023734	-0.043743089	-0.157290589	-0.315153991	-0.459196997	-0.543123898	-0.551527758	-0.472465277	-0.346445882	-0.229069393	-0.154870869	-0.162344843	-0.232567074	-0.366638626	-0.528975817	-0.657665685	-0.69358956	-0.663201076	-0.531925868
0.051050277	0.187984515	0.36956348	0.519993191	0.586555519	0.541772413	0.403991265	0.204898677	0.004171564	0.142234874	0.182318876	0.107893329	0.037471677	0.206104721	0.352184434	0.402553438	0.350731761	0.216745177	0.043444256	0.115260407	0.176041802	0.143044015	0.002148471	0.204298549	0.400289541	0.545508473	0.584030659	0.520659885	0.3618433	0.188116097	0.061913528	-0.007716123	-0.049250476	-0.18860175	-0.357323062	-0.520391865	-0.585191887	-0.547000377	-0.402243078	-0.207322458	0.001167222	-0.138155297	-0.178642058	-0.11409723	-0.031789123	-0.206223877	-0.357228432	-0.408592643	-0.351433226	-0.222512469
0.037134034	0.132167097	0.25655039	0.379059332	0.469759859	0.49542594	0.482966623	0.444217741	0.38390907	0.36581209	0.4030341	0.484530694	0.615194191	0.741139015	0.840313017	0.866335272	0.83222566	0.736993378	0.618822652	0.488684491	0.405036532	0.377055092	0.385542609	0.433548321	0.480230029	0.492797711	0.47148501	0.375221732	0.267849211	0.133552419	0.036397029	-0.003204076	-0.038483841	-0.13048313	-0.249268217	-0.373178149	-0.471068425	-0.498963834	-0.487223908	-0.429953844	-0.380678489	-0.363939869	-0.398310012	-0.478533501	-0.611200345	-0.725584434	-0.830506798	-0.872673329	-0.834852372	-0.743502939
0.057605088	0.200572255	0.368062381	0.513350402	0.554587088	0.473672102	0.271619952	0.089251945	0.290195639	0.483056757	0.575396758	0.523216478	0.396887761	0.249875719	0.185518553	0.174944103	0.1801848	0.252635964	0.398850922	0.53161747	0.564967184	0.485974352	0.287722874	0.086501024	0.274017361	0.472980765	0.557843734	0.513473834	0.364339712	0.194599942	0.051066425	0.004703165	-0.047252142	-0.192543749	-0.360861548	-0.508271812	-0.546824537	-0.479871039	-0.287019225	-0.089904875	-0.288259474	-0.484087926	-0.579910656	-0.538365018	-0.406380898	-0.251331829	-0.18870722	-0.177673768	-0.184171378	-0.243986074
0.1074277	0.193742668	0.293930526	0.380781395	0.472838711	0.541431101	0.634316167	0.710577162	0.775579786	0.817860911	0.882351242	0.932897415	0.945131819	0.976727918	0.994301811	1.004383499	1.001743343	0.97727901	0.968718345	0.929875717	0.877365627	0.829585616	0.770227487	0.703153646	0.934142954	0.562349107	0.467236692	0.382734949	0.292947796	0.193165597	0.09567964	0.006731741	-0.101338151	-0.190270553	-0.299848698	-0.384158018	-0.478286684	-0.547893163	-0.62808253	-0.714246794	-0.762792748	-0.838356415	-0.875591431	-0.916010208	-0.957225822	-0.969125138	-0.999233224	-1.002227397	-0.999443452	-0.973498594
0.094661112	0.182529332	0.298294462	0.383909379	0.476087346	0.542667575	0.635778759	0.70660502	0.778102753	0.825415866	0.890936302	0.91641337	0.97646086	0.977874279	1.017622483	0.994300824	0.996806378	0.980778367	0.968241467	0.913091255	0.896825801	0.839098971	0.768346284	0.71116451	1.088896206	0.564606862	0.463941271	0.391690834	0.294573002	0.189734257	0.109774322	0.000252661	-0.10776141	-0.205304571	-0.283298935	-0.374072614	-0.47526046	-0.560016928	-0.632131976	-0.704250448	-0.759801389	-0.842314943	-0.887593206	-0.930425006	-0.95815196	-0.964703867	-0.997973741	-0.989383043	-1.004890498	-0.981618659
0.095392715	0.202298442	0.292720741	0.388819783	0.475358874	0.562033153	0.631327489	0.70818997	0.775791225	0.830663359	0.899066717	0.928282301	0.962450992	0.988141691	1.002286024	1.001908541	0.990493942	0.985694189	0.954458687	0.930230046	0.884489617	0.823618604	0.772454954	0.703251814	0.629306572	0.561112038	0.467249957	0.373213789	0.296351881	0.199929162	0.105005098	0.008451027	-0.085612856	-0.200268432	-0.276970554	-0.382424598	-0.480674577	-0.560445597	-0.631347049	-0.707107042	-0.783587449	-0.834539459	-0.884577607	-0.907762665	-0.957400632	-0.985760437	-0.986576713	-0.996092997	-0.987546763	-0.979766398
0.086771659	0.203506669	0.29091073	0.386231747	0.473967528	0.55060896	0.632359382	0.702084392	0.770146211	0.832341886	0.883969812	0.928179368	0.958781212	0.982788439	0.995079533	0.998579342	0.990488133	0.985723156	0.95959558	0.923566719	0.881521975	0.836700652	0.768894059	0.710408941	0.641058739	0.558387233	0.470953399	0.381433893	0.294754583	0.194803832	0.103154169	0.002507136	-0.097300958	-0.195413186	-0.286596078	-0.376638186	-0.46553141	-0.547320495	-0.634288075	-0.696328175	-0.783608945	-0.821601171	-0.875279748	-0.918786642	-0.956237342	-0.982304228	-0.998726256	-1.006415399	-0.985542442	-0.987541554
0.030651743	0.101731497	0.18306774	0.30145356	0.390871288	0.442545019	0.474377963	0.484549522	0.482113032	0.499445257	0.566269618	0.646948342	0.748108058	0.852209357	0.925077678	0.951827068	0.925508367	0.846293643	0.763040079	0.660157402	0.576477051	0.499882031	0.486680397	0.472254206	0.470731713	0.4389677	0.387729621	0.296006538	0.197537714	0.102363766	0.023844606	-0.001341673	-0.018224169	-0.094239087	-0.19914406	-0.300108647	-0.364655718	-0.42656103	-0.460997913	-0.476549533	-0.487755129	-0.504411122	-0.571854592	-0.646023563	-0.749874	-0.836493354	-0.915536063	-0.940237744	-0.923942605	-0.853080447
0.094163465	0.186041269	0.30154499	0.386172864	0.470773403	0.547132544	0.631585386	0.717493939	0.757985186	0.82592073	0.882605142	0.946386401	0.948037147	0.985373753	1.008309376	1.018614636	0.991738442	0.975522112	0.951553436	0.915368286	0.895279366	0.826503479	0.774445403	0.707714938	0.629133838	0.567451731	0.465019288	0.376862278	0.290484308	0.188781666	0.088952893	0.00749553	-0.090498202	-0.188884626	-0.296202279	-0.38415773	-0.472128026	-0.547725008	-0.621331223	-0.708812124	-0.755923254	-0.822661124	-0.882234396	-0.909806555	-0.959801964	-0.986704329	-1.001294116	-1.005538502	-1.003225084	-0.986045629
0.105117952	0.193815352	0.290958373	0.385745195	0.470092264	0.556096061	0.631334066	0.711119144	0.773052199	0.840500762	0.880304422	0.91925513	0.955340304	0.982019546	1.002327597	1.007632501	1.005962695	0.985225435	0.970785513	0.928063551	0.876159877	0.827074619	0.783733387	0.710156094	0.640248906	0.563528503	0.475004602	0.381874513	0.298679892	0.190858554	0.097389331	0.005835687	-0.113359692	-0.189853431	-0.300290984	-0.373898424	-0.474055372	-0.555102233	-0.632208999	-0.718094956	-0.762134882	-0.82521347	-0.879533307	-0.913619882	-0.965170026	-0.990653761	-0.994131472	-0.995752232	-1.007662388	-0.981680683
0.0969391	0.195798444	0.276743674	0.397924533	0.476017799	0.567626975	0.636527757	0.70727706	0.777374013	0.828439104	0.867630865	0.929529752	0.958987007	0.973126713	1.000300623	1.005344013	0.997315543	0.983494356	0.961212178	0.92596583	0.892425906	0.839090632	0.764852751	0.719790114	0.636516103	0.549213628	0.455342192	0.383462093	0.300541481	0.202796083	0.111717753	-0.016395462	-0.087466846	-0.198966113	-0.292140963	-0.391303471	-0.47524541	-0.559157743	-0.641022242	-0.699147103	-0.770300337	-0.838890059	-0.881070549	-0.919312172	-0.961334382	-0.961602158	-0.990495456	-0.99570205	-0.995783126	-0.989498614
0.103230689	0.20617913	0.278676828	0.373653769	0.466328604	0.549881442	0.631540861	0.719024882	0.773864767	0.827353318	0.879232077	0.926242766	0.957006534	0.988415198	0.985244333	1.002481805	0.990252201	0.980425492	0.96994638	0.935089316	0.887703849	0.837404564	0.778528554	0.726316355	0.643921524	0.558828933	0.467876831	0.390315971	0.300260502	0.183827417	0.095008545	0.000772412	-0.093871499	-0.188813778	-0.292770152	-0.376700525	-0.479704562	-0.552494937	-0.626518742	-0.718544386	-0.771436364	-0.827046813	-0.885434928	-0.920582051	-0.948715863	-0.991020707	-0.994722012	-0.997833954	-0.996332656	-0.977844245
0.079055084	0.186967013	0.288085068	0.390195749	0.467409944	0.553252417	0.640642474	0.721476253	0.760209102	0.841872601	0.885171118	0.920774008	0.959591266	0.978672251	1.001742074	0.998860899	0.994104807	0.990082003	0.968220329	0.934886565	0.881365416	0.834508362	0.753272387	0.701200995	0.644292957	0.548961445	0.480335016	0.385079472	0.295900893	0.201743888	0.091412739	0.012307296	-0.103767507	-0.198462362	-0.285376522	-0.368009817	-0.471311848	-0.545693651	-0.635133249	-0.705278394	-0.771474415	-0.838647346	-0.870689718	-0.915578126	-0.953907752	-0.975002875	-0.990442179	-0.99607654	-0.992434121	-0.99476117
0.098772071	0.195560978	0.294239269	0.383235221	0.471820113	0.547346924	0.633839612	0.700175052	0.763480017	0.836959596	0.878246475	0.924804574	0.943581097	0.978577077	0.998556863	1.005362936	0.998545832	0.984981449	0.949212255	0.924717832	0.874016019	0.832193126	0.774061403	0.712384164	0.641150016	0.554427292	0.477371616	0.375839365	0.288614538	0.1914909	0.109171946	0.00156205	-0.095853598	-0.191330262	-0.28980402	-0.380790135	-0.474594508	-0.547876654	-0.630716575	-0.714083102	-0.77754358	-0.83348819	-0.885656995	-0.920885606	-0.95958176	-0.974906416	-1.002823504	-0.997293231	-0.995210671	-0.978399393
0.090192443	0.193518213	0.292753891	0.38025785	0.464605362	0.560279178	0.639510379	0.704377061	0.771037902	0.826457481	0.882769845	0.934347358	0.956769859	0.978565114	0.995218563	1.002434456	0.995902016	0.983512587	0.956498609	0.926226661	0.87394216	0.834150658	0.771629867	0.702486055	0.638533209	0.555793275	0.471068998	0.378723391	0.307095839	0.194831351	0.097859069	0.008254727	-0.09272249	-0.192440768	-0.286401294	-0.382177218	-0.46080686	-0.552067607	-0.635659861	-0.707731599	-0.780407095	-0.832831359	-0.880850164	-0.919137146	-0.961182441	-0.98335555	-0.988229589	-1.004901335	-0.997605488	-0.983665302
0.104681864	0.198970658	0.28828274	0.399559963	0.480923192	0.54854039	0.628476496	0.71460986	0.764584014	0.828247977	0.867879018	0.924774206	0.953147562	0.993747717	1.016264899	1.011359874	1.007155782	0.988144999	0.959104409	0.935144834	0.882566489	0.840722371	0.768498617	0.725514663	0.636478087	0.550128559	0.479563905	0.369673717	0.293149152	0.212495284	0.101495596	0.003770024	-0.123068612	-0.205306722	-0.295824473	-0.366975218	-0.476209778	-0.544946376	-0.651155921	-0.706620719	-0.768313148	-0.82901724	-0.896003908	-0.915788695	-0.933580764	-0.988422114	-0.996849594	-0.96972934	-0.993519165	-0.973380713
0.223735505	0.392027903	0.506292592	0.569842585	0.57826257	0.590679589	0.597703412	0.62570588	0.712686328	0.810828387	0.880534636	0.920729405	0.941432698	0.928606922	0.903207644	0.896623609	0.905983743	0.931214196	0.941175789	0.923543715	0.872760685	0.812063414	0.733317837	0.64201757	0.597101657	0.584471088	0.573053037	0.579463233	0.514277157	0.386669096	0.223302553	0.002133557	-0.21259345	-0.389556938	-0.520772035	-0.570486174	-0.583885134	-0.574694628	-0.584992521	-0.634881579	-0.705801664	-0.796152072	-0.887372755	-0.917794863	-0.91922718	-0.927965176	-0.905241053	-0.907497252	-0.918163487	-0.927663316
-1.811928923	-1.793412239	1.007619473	4.708019256	-3.82236095	1.685713389	11.7468362	5.669033964	4.942700541	1.28657162	4.270676808	0.099717846	-2.651145457	9.577921004	-3.488762816	0.766626696	5.672953764	4.013844237	-7.484591514	5.435615957	-5.164971861	-1.014899303	4.318388486	-5.817717888	0.074808836	-2.964490714	5.199657835	-0.631302719	2.944467655	-3.000623995	3.166877795	2.972142499	3.066905605	-0.427529751	2.224539793	4.682750992	-3.343718483	5.734675387	0.485090888	3.729234183	-8.416258576	-7.018458459	-7.946744239	-7.382395431	0.708509865	-3.480276232	1.542788017	-5.692362053	0.968989491	2.861078498
0.099875152	0.194784828	0.28206227	0.372680943	0.466812816	0.547532067	0.618458171	0.720472492	0.774996425	0.81899379	0.878903286	0.920014666	0.94620603	0.971253116	0.991286241	1.001138169	1.005442984	0.967502648	0.972186973	0.918701324	0.877365293	0.830681641	0.775310288	0.705243232	0.252302943	0.554181572	0.492733811	0.400865595	0.293468227	0.186093184	0.102531381	-0.000429514	-0.095519043	-0.193472628	-0.288958434	-0.383471667	-0.470042775	-0.559084008	-0.63692981	-0.702599691	-0.779528687	-0.830307388	-0.879120345	-0.916899035	-0.9561673	-0.972392164	-0.999446411	-0.996386561	-0.988592581	-0.98108846
0.096140534	0.188951597	0.285551202	0.381834876	0.475356459	0.556257806	0.638999343	0.711177681	0.77467354	0.83295806	0.876590637	0.918713123	0.954744002	0.995378078	0.99457697	0.99425777	1.010824502	0.97059823	0.962665967	0.927645062	0.885056833	0.83432587	0.761916934	0.69900363	0.631422325	0.547418969	0.469401052	0.387536703	0.301500838	0.198908961	0.097081758	0.001270702	-0.108099755	-0.205747138	-0.290695795	-0.377784451	-0.473869569	-0.550384242	-0.630181895	-0.712024626	-0.773138732	-0.833030339	-0.890927273	-0.925933519	-0.96557851	-0.982080467	-0.983614973	-0.991257881	-0.993984052	-0.985261159
0.096119661	0.203463079	0.28516771	0.380425732	0.474579849	0.546321748	0.634181224	0.701404324	0.774162354	0.828523255	0.885066941	0.929554027	0.966748568	0.987356834	0.992073553	0.989609317	0.996165752	0.98060075	0.956918476	0.926049978	0.879422197	0.825044048	0.772197755	0.712072884	0.642523957	0.553486374	0.468972478	0.391088541	0.293720597	0.202112348	0.097172533	-0.000900148	-0.101614488	-0.202463083	-0.288034891	-0.390029109	-0.466563578	-0.554504627	-0.625810739	-0.71737151	-0.762576904	-0.829986652	-0.884511479	-0.919840939	-0.959516075	-0.976199755	-0.996867804	-1.004123395	-0.992051564	-0.974944325
0.095898207	0.198506998	0.283861826	0.379806329	0.463004074	0.54797549	0.632160321	0.712098519	0.771778305	0.841985694	0.87854333	0.930767523	0.958276343	0.981257554	0.995790553	1.006842393	0.998291691	0.979396237	0.95546759	0.920344068	0.889349316	0.826396356	0.770973662	0.707594943	0.638276204	0.551887829	0.465960604	0.388398762	0.290067126	0.2057555	0.097117229	0.005310958	-0.104413249	-0.195750783	-0.285386103	-0.384155554	-0.473669068	-0.550169753	-0.630728842	-0.706555216	-0.784052696	-0.842828537	-0.882461463	-0.922450431	-0.958475002	-0.983109749	-0.987328223	-0.996815401	-1.00096716	-0.977496587
0.093372086	0.201128324	0.301482303	0.380857468	0.470105607	0.559818791	0.63511841	0.678501069	0.753861786	0.829877294	0.87364885	0.913097986	0.952964325	0.988793891	1.013184054	0.999497118	0.991785488	0.984998713	0.936137197	0.916988306	0.873017487	0.835336534	0.783242933	0.717198427	0.64459232	0.546800528	0.48693053	0.372378134	0.305906788	0.179991247	0.106394339	0.000704694	-0.095780951	-0.178553758	-0.297467183	-0.375082899	-0.473973605	-0.550635901	-0.642311364	-0.693658336	-0.771260475	-0.843012674	-0.885824069	-0.910818815	-0.960574973	-0.974353932	-0.998014058	-0.997260205	-1.003162108	-0.996594822
0.100320723	0.18703372	0.280830126	0.385728529	0.476991665	0.56835091	0.641380075	0.706290976	0.785067844	0.832577835	0.902007252	0.938945019	0.977587956	0.992175868	1.024634399	1.012626983	1.02569896	0.999681788	0.972369583	0.952584924	0.898038338	0.854828234	0.81130781	0.739838876	0.65139549	0.580113809	0.485686851	0.404092796	0.316623374	0.204917461	0.099077117	-0.014462899	-0.105586541	-0.207322949	-0.312200296	-0.39410905	-0.501125977	-0.592956	-0.679517627	-0.741209656	-0.799359418	-0.870100382	-0.935801935	-0.978839591	-1.013733535	-1.03327344	-1.062553903	-1.059224609	-1.059138438	-1.046908876
0.066511932	0.24052101	0.463891512	0.634084324	0.717788335	0.618783118	0.457721107	0.379152369	0.5524317	0.774708016	0.893273946	0.894177046	0.825178167	0.764274343	0.746509466	0.760960805	0.745138272	0.759012755	0.820258897	0.88800612	0.905349712	0.783623953	0.558474251	0.3798903	0.440808961	0.627045888	0.695560708	0.637849108	0.460741249	0.249069866	0.065917444	-0.003257658	-0.072913319	-0.237734725	-0.468606796	-0.635483796	-0.701925122	-0.618817887	-0.460289356	-0.367465985	-0.555833172	-0.770907452	-0.908533853	-0.888812676	-0.83295274	-0.765877126	-0.75175535	-0.760439581	-0.746228871	-0.767386684
-6.373430871	1.241424473	0.411483504	-3.736844432	4.296176241	-7.542372296	0.295356927	2.5574939	-11.27717437	2.943738243	-4.836368735	13.62146433	1.090149944	2.479126754	0.258679697	0.59658904	-1.728111724	-0.056981128	-2.565549308	-0.943942407	6.987074827	-5.35140397	-0.554314307	10.19420303	1.991201646	7.926439357	2.970702195	-4.622906295	-1.337606872	8.672510126	-8.178497485	7.419550738	-8.90515178	-4.646016541	2.011797458	-4.892699191	4.097316885	-3.514562101	-4.164739086	-3.917570009	-7.286319242	-5.138240756	-4.015448246	-7.889471503	5.726034896	5.351342968	-1.591422022	-1.436689193	5.187915811	4.997882978
0.072187806	0.246521552	0.491791295	0.675684398	0.744970057	0.66597322	0.499013604	0.435523653	0.622637648	0.849652977	0.979705832	0.98781063	0.933821534	0.872906156	0.863417315	0.86280355	0.850311645	0.86189356	0.922259958	0.989432433	0.97636377	0.853302187	0.623642919	0.437492268	0.491808039	0.664130534	0.74001903	0.67309203	0.48408478	0.257648364	0.071855122	0.000132398	-0.067443872	-0.252175566	-0.488537343	-0.667129581	-0.745337749	-0.672585569	-0.492663354	-0.426600413	-0.625457492	-0.856851714	-0.981472777	-0.999331081	-0.923011285	-0.865034466	-0.860733546	-0.867009478	-0.856028211	-0.873299832
0.096252591	0.199314945	0.292648332	0.383799893	0.475549294	0.559045013	0.644998828	0.713804148	0.783948386	0.849119397	0.894163228	0.951449647	0.991019295	1.005256745	1.021815025	1.031540957	1.029871423	1.01531011	0.996007463	0.958478105	0.919861571	0.870752877	0.810414236	0.736541461	0.653813967	0.584208512	0.490100136	0.40322972	0.300391334	0.20725767	0.108629069	0.007885892	-0.106005233	-0.20809111	-0.305911128	-0.40298365	-0.496888492	-0.589600031	-0.67327156	-0.755339967	-0.825420515	-0.897256111	-0.948175181	-0.996092074	-1.033024744	-1.062385102	-1.074141301	-1.085407131	-1.080302347	-1.064737303
-0.075979879	0.114347151	0.47178184	0.664895675	0.415074873	0.565135134	0.575502468	0.816209306	1.040265941	0.686969944	0.990759339	0.929883085	0.911839792	1.183539338	0.820152151	0.938216977	1.004269207	0.795088539	0.833445897	0.722959678	0.716321391	1.088612042	0.506527538	0.802227404	0.207691256	0.665455041	0.228901282	0.393069696	-0.071526325	0.238073779	0.208135889	0.238022601	-0.342381655	-0.183107555	-0.194863295	-0.457272071	-0.468219127	-0.661859783	-0.651132329	-0.971844067	-1.13900313	-0.901294701	-0.575652513	-0.647873192	-0.737292041	-1.017726209	-1.015907325	-1.046030323	-1.015854098	-0.941511996
0.104626577	0.193440974	0.299001436	0.39141826	0.468711224	0.580286049	0.616096607	0.70040125	0.769225954	0.831086939	0.87592674	0.914002538	0.950343616	0.991425485	0.990108825	1.000727334	0.989565101	0.982472315	0.966534297	0.928931761	0.884999387	0.831436516	0.758063919	0.710858313	0.630735121	0.5732568	0.468565763	0.385667299	0.282127482	0.191872669	0.106525196	0.005612922	-0.091395357	-0.189586061	-0.286901458	-0.365062	-0.464554733	-0.57241432	-0.616808475	-0.688390948	-0.75824648	-0.837521926	-0.887246043	-0.914156683	-0.962094243	-0.98167015	-1.000455099	-0.99341946	-0.998204907	-0.991381542
-4.287529326	0.283048901	2.539264307	3.867656713	-0.064308936	1.597066619	0.097503249	2.770923215	-3.739961797	-9.182171478	-9.418209432	6.766011566	-2.253170552	14.5822145	3.417474891	-0.291583476	-0.291876425	-1.805833724	3.912744154	3.724864866	-0.579958851	1.869154905	-3.545934828	2.483089294	4.939715659	-5.643859789	-5.966286614	-1.079913025	5.258564516	-0.629535899	-10.63955645	5.309713956	4.699490704	-10.60614519	-5.964874932	-4.579540612	-4.600510006	0.54199218	9.487290995	-0.401138198	0.412235083	-4.254886302	-3.433075695	-10.3964964	1.63491074	7.904037503	-5.93707554	-2.407543077	4.47420095	-0.374634641
0.090143792	0.193100165	0.29615333	0.386579197	0.470293682	0.550474647	0.635313048	0.719138772	0.773432368	0.836621455	0.884889136	0.921615237	0.941597829	0.973754451	1.000469817	1.000029028	0.983358791	0.983178485	0.952295057	0.920371688	0.879349995	0.829213802	0.769527318	0.717351211	0.645287516	0.561732429	0.470069636	0.380141447	0.290694095	0.202442111	0.10340111	-0.000562415	-0.095275207	-0.183831417	-0.283860205	-0.385034065	-0.473447979	-0.559968462	-0.627031085	-0.697522912	-0.763573412	-0.82102202	-0.88527583	-0.935235853	-0.958024893	-0.981972686	-1.00101762	-0.998886042	-0.99576667	-0.986880754
0.094232105	0.20160378	0.284243248	0.394383324	0.474570042	0.558180759	0.634774772	0.7194162	0.771374607	0.832507732	0.877488755	0.918443018	0.952202912	0.977329122	0.999275324	0.994623133	0.998857845	0.977891728	0.962300517	0.912417277	0.888345511	0.836609002	0.772138752	0.711312863	0.990985389	0.562354496	0.476478051	0.391255727	0.293617546	0.207698854	0.095606785	-0.006019093	-0.101120567	-0.182891806	-0.294154097	-0.371083254	-0.469203959	-0.549073722	-0.638192346	-0.713067914	-0.768686184	-0.822461603	-0.868638973	-0.934292632	-0.957913712	-0.971602861	-1.002241053	-0.996286938	-0.992134534	-0.986906615
0.097012753	0.190955491	0.292355894	0.372633746	0.480882246	0.558850992	0.636236014	0.714968424	0.773964972	0.8321087	0.887811673	0.927180786	0.960056374	0.988656717	0.980267271	1.001347539	0.982218028	0.980481923	0.96298439	0.916495426	0.898033732	0.824341009	0.767605406	0.705280357	1.004240278	0.559188162	0.463555251	0.373505301	0.300788387	0.20060218	0.099700543	0.014347229	-0.106132657	-0.191200894	-0.294002758	-0.382113653	-0.458602454	-0.559289245	-0.640107674	-0.704852883	-0.773329331	-0.830602841	-0.882483133	-0.932778562	-0.972801042	-0.97868171	-0.989635062	-1.005358385	-0.974629829	-0.988491786
0.0722624	0.260716538	0.493459341	0.67799757	0.7413762	0.666481678	0.490199842	0.433930521	0.62413079	0.850363869	0.984367446	0.996253947	0.920273609	0.868141342	0.854791304	0.865646592	0.856173252	0.869116845	0.914723035	0.990219132	0.97250234	0.856702126	0.617300007	0.428922709	0.494809148	0.667205008	0.748033383	0.672501304	0.476913627	0.260270826	0.062794405	-0.003509538	-0.073224868	-0.248322769	-0.482552934	-0.672936341	-0.742813006	-0.666500535	-0.492800283	-0.426591779	-0.619867347	-0.848865904	-0.97679498	-0.985515382	-0.930199072	-0.870337545	-0.859061074	-0.862344074	-0.858720477	-0.866782765
0.174123105	0.338194866	0.48666449	0.578437371	0.642372068	0.678057069	0.685507451	0.703139678	0.719688912	0.752798008	0.795420604	0.835919011	0.915186418	0.957494117	0.994163664	1.031677155	1.002595792	0.973896055	0.919062229	0.858774504	0.807886075	0.768587687	0.745248189	0.718116093	0.698859856	0.687331127	0.650183557	0.581221794	0.497573826	0.359292742	0.18590676	0.004521274	-0.163070451	-0.343980931	-0.473460571	-0.56354846	-0.613261761	-0.653377718	-0.657081633	-0.662622046	-0.656630312	-0.689235798	-0.733865192	-0.769485255	-0.814650605	-0.878279862	-0.892860759	-0.906679727	-0.875212888	-0.859182969
0.092101008	0.188468548	0.295464714	0.386384881	0.473447797	0.565635745	0.641761081	0.719987424	0.787405801	0.84129228	0.905554746	0.945472337	0.981250667	1.001775049	1.02016411	1.024159407	1.020817831	1.00376521	0.980963413	0.95508606	0.915671612	0.867153281	0.810205459	0.731211004	0.641821467	0.582490556	0.497020045	0.41112602	0.30438542	0.195551686	0.098846121	0.009289616	-0.100766505	-0.204237142	-0.302706131	-0.398971762	-0.4932807	-0.593791467	-0.666289338	-0.76402889	-0.826575296	-0.883818939	-0.943929224	-0.996857551	-1.03556468	-1.059821729	-1.076624809	-1.088693142	-1.073536068	-1.057128888
0.090261219	0.195924977	0.287319565	0.381917127	0.474382621	0.559500642	0.632242443	0.706191739	0.777395106	0.831600126	0.890907761	0.922024847	0.957533462	0.981479024	0.99118496	1.016977089	0.997297117	0.981292946	0.957924757	0.921001465	0.880305553	0.833508548	0.786092958	0.710488034	0.958512505	0.568474543	0.475026146	0.385806038	0.282164262	0.195782353	0.09874399	0.000770876	-0.10887415	-0.195048728	-0.281054203	-0.374694519	-0.472423206	-0.561393002	-0.635996546	-0.698672347	-0.768674724	-0.825608014	-0.881756801	-0.938024147	-0.94592049	-0.977984938	-0.992996652	-1.006080934	-0.996226678	-0.981286043
0.084988192	0.19082233	0.2887023	0.376395072	0.484989414	0.552041437	0.628370071	0.711557902	0.776583074	0.843122585	0.875607511	0.923461115	0.950187152	0.993093801	0.99784388	1.002624788	1.003334134	0.987290963	0.957521402	0.931795929	0.883961889	0.832839407	0.770704777	0.723545634	0.336378968	0.54535538	0.483109065	0.38479148	0.275337117	0.197507374	0.095647918	0.00903771	-0.092212606	-0.197856598	-0.298909929	-0.374014816	-0.477082341	-0.551904734	-0.631194087	-0.710777729	-0.777473297	-0.840980149	-0.886546775	-0.911492372	-0.955490768	-0.987273752	-0.988216658	-0.98585814	-0.999705654	-0.980791091
0.103235258	0.205366104	0.291283199	0.372587852	0.473026629	0.55299689	0.631162616	0.699130566	0.76797682	0.835900154	0.878372111	0.923504454	0.954017571	0.992367118	0.999562127	1.002977533	0.990898549	0.981473092	0.949431908	0.92281532	0.887884378	0.82761116	0.774448381	0.714232314	0.632371832	0.553166462	0.482725942	0.37802331	0.284325465	0.195035277	0.102405384	0.011281298	-0.102270174	-0.194572352	-0.287521668	-0.378566679	-0.466576337	-0.55411107	-0.633573657	-0.702348129	-0.773022796	-0.832939357	-0.876423096	-0.914763773	-0.952811816	-0.973227126	-0.998317822	-0.995563547	-0.986016563	-0.977771259
0.046645895	0.195004178	0.373997255	0.516968208	0.565372484	0.502869913	0.309095414	0.14833277	0.327287816	0.519507285	0.611974242	0.583051959	0.461281695	0.343580342	0.298645084	0.308844333	0.294435016	0.349590051	0.473676746	0.575595498	0.602655853	0.531010522	0.335494652	0.151204208	0.303167427	0.477855893	0.575258497	0.536258315	0.374553137	0.20442058	0.067227531	0.002852963	-0.048745651	-0.188738596	-0.373699567	-0.510493266	-0.570280191	-0.498978564	-0.299975329	-0.157849722	-0.317870355	-0.521558061	-0.608236496	-0.587292408	-0.466014756	-0.353208273	-0.297990169	-0.31018918	-0.305646031	-0.357192924
0.099988113	0.182074597	0.282243242	0.380838579	0.464076133	0.564768108	0.63208536	0.710344329	0.790311533	0.842086219	0.886998591	0.943052563	0.988561797	1.000690632	1.012065757	1.022277509	1.026622763	1.011578669	0.992008772	0.952696457	0.913072453	0.862259655	0.811616136	0.738409619	0.669225865	0.583721732	0.484281333	0.389893447	0.302697533	0.200230401	0.110468451	0.010166262	-0.112993289	-0.205553403	-0.299186054	-0.40594143	-0.502510667	-0.585946569	-0.684899501	-0.770129704	-0.836115539	-0.894355674	-0.958819923	-0.997381088	-1.034449082	-1.047091977	-1.071588578	-1.072777747	-1.076421851	-1.060669001
0.101172662	0.194619831	0.292565089	0.389076681	0.476265113	0.562742588	0.634192376	0.718745315	0.795599655	0.841402656	0.90867215	0.952066711	0.985841513	1.003313891	1.023360906	1.034147686	1.022100393	1.016824553	0.994770398	0.963340507	0.913385703	0.871334442	0.800417921	0.745584197	0.668984593	0.577280848	0.514134945	0.412527141	0.305456421	0.210165183	0.097395712	-0.005476848	-0.098943258	-0.205981568	-0.302221498	-0.406319756	-0.496771395	-0.59199633	-0.674080199	-0.754772184	-0.833719939	-0.892595945	-0.947418175	-0.997983324	-1.028319523	-1.055189764	-1.080151602	-1.084017468	-1.070350811	-1.063295974
0.097319382	0.19691848	0.291623855	0.373003193	0.474882068	0.566829146	0.629252876	0.70166643	0.774949129	0.837647809	0.867398151	0.923841816	0.955639081	0.98059284	0.991626996	0.994954319	0.994184659	0.980252561	0.955888212	0.929888743	0.873434978	0.834145945	0.775025069	0.705927411	0.641055945	0.548847499	0.484361377	0.396864138	0.289123387	0.201888543	0.100402845	-0.002326647	-0.101853611	-0.188482749	-0.278714069	-0.388943353	-0.47754295	-0.555542429	-0.631620854	-0.704358245	-0.783149109	-0.830241907	-0.882358435	-0.929759192	-0.958427581	-0.981796132	-0.992559339	-1.002479567	-0.98992146	-0.981431305
0.04513069	0.199123395	0.386373071	0.527418224	0.565605055	0.492804652	0.306271432	0.154851298	0.325330682	0.521075667	0.608774224	0.586443923	0.469366008	0.343212088	0.298909042	0.299808736	0.290103522	0.335510525	0.467341761	0.574499073	0.606448481	0.534543565	0.345533069	0.144019758	0.299420832	0.485038046	0.576144356	0.522960189	0.382456504	0.19153231	0.053592994	-0.006341397	-0.046155343	-0.196616961	-0.381979433	-0.519890301	-0.563822392	-0.493708058	-0.311957689	-0.136780595	-0.317765967	-0.524669014	-0.620775371	-0.5775974	-0.465332931	-0.346053683	-0.306793358	-0.285515605	-0.294784846	-0.347015828
0.224603573	0.419113094	0.538817041	0.588823151	0.594401584	0.582026243	0.581254416	0.628912256	0.695101726	0.799100491	0.871340822	0.925276067	0.937324307	0.931963254	0.887783526	0.884924823	0.890095153	0.929032607	0.938714917	0.932033072	0.879312762	0.802021141	0.699174518	0.632118619	0.588324337	0.581541147	0.607065119	0.591189055	0.544780918	0.430256452	0.237931211	-0.007068335	-0.227939553	-0.412607782	-0.527259664	-0.592962719	-0.613032401	-0.571296278	-0.586251737	-0.614373301	-0.708725313	-0.795016067	-0.878397774	-0.921312171	-0.932374923	-0.919650773	-0.907088653	-0.897526899	-0.905135573	-0.917263261
0.108593348	0.190533007	0.298437622	0.39336671	0.483234554	0.559598245	0.64997124	0.719108801	0.792713372	0.854620093	0.901611879	0.94417393	0.977684502	1.004869216	1.028340754	1.035523647	1.038296341	1.007444286	0.98998807	0.957813178	0.921422785	0.859830484	0.815046189	0.748777537	0.658585339	0.582541572	0.49649589	0.398230768	0.30666871	0.211596748	0.097073375	-0.007276795	-0.100486182	-0.211211951	-0.304601636	-0.406285972	-0.506485061	-0.590493599	-0.680504826	-0.749325049	-0.82631603	-0.895488033	-0.93995038	-0.99430442	-1.033211514	-1.055601324	-1.081004647	-1.083832746	-1.075599952	-1.066029546
-0.204884777	-0.518156004	0.963115843	0.806242059	-1.078772619	-0.266589523	-0.700011896	0.947206732	0.691884283	-2.082450966	-0.502174291	1.615468906	1.852237929	1.016027729	1.557243463	1.706256884	-0.99820457	0.53180181	-1.625146133	-2.681830424	-0.306994769	0.810577705	2.245999409	3.422578494	0.54531454	0.733951017	0.094507281	0.103237801	-1.084424684	1.987223203	-1.065412046	-1.698660552	1.737433883	-2.590480479	1.481472241	2.073532391	1.813623122	-0.163448947	1.875510438	-0.191470716	-2.123570149	-0.457028072	-0.251906168	0.316088192	1.214367205	2.157065692	-0.100238965	-1.007151868	-2.899439803	0.030479571
0.104078772	0.204134401	0.289387554	0.386285033	0.464965809	0.551146134	0.625899766	0.709306721	0.772799336	0.848303623	0.886091258	0.927529049	0.967236027	0.978989609	0.998118462	1.003374383	1.001141863	0.985071194	0.961719362	0.921277741	0.878665376	0.830780454	0.775602459	0.70405834	0.3443006	0.561677759	0.467505591	0.39357215	0.297072406	0.187691846	0.108504574	0.005180373	-0.093709967	-0.193784184	-0.288906206	-0.374726656	-0.456739221	-0.554332166	-0.630071229	-0.707870184	-0.774682157	-0.81597436	-0.869931119	-0.917282769	-0.952714687	-0.988217759	-0.993919602	-1.006732403	-1.000737292	-0.991163481
0.199495789	0.375126496	0.502450484	0.549129091	0.579984493	0.583432311	0.594782799	0.637146957	0.733549458	0.793974461	0.877168939	0.918095526	0.944326946	0.9438678	0.930724383	0.917530674	0.925450407	0.936687694	0.952739209	0.932863696	0.882091226	0.809669067	0.715184641	0.642354903	0.594088203	0.585135936	0.57596246	0.555532422	0.495768178	0.387333986	0.213399473	0.003339124	-0.21537917	-0.378909156	-0.490814133	-0.553674487	-0.570738677	-0.566059998	-0.602828709	-0.648911068	-0.73599125	-0.806290054	-0.885435554	-0.92363308	-0.949678441	-0.935464	-0.918893907	-0.903854601	-0.923876921	-0.943028419
0.096617387	0.209094247	0.295778312	0.386556642	0.4755139	0.570827389	0.654201305	0.712070017	0.790064663	0.834818141	0.900781115	0.945617696	0.984151386	1.01059698	1.030952043	1.023282903	1.028313934	1.017870221	0.995930566	0.958525796	0.926561806	0.872394774	0.821651904	0.75694254	0.660445987	0.585985713	0.502381686	0.404498874	0.294893586	0.192779048	0.108572797	0.0174079	-0.111384006	-0.214058225	-0.309154435	-0.412899037	-0.498191835	-0.586750671	-0.691651056	-0.75799186	-0.827633693	-0.870675434	-0.946893096	-1.00293039	-1.031837164	-1.059092765	-1.069560214	-1.078851078	-1.075728728	-1.056036444
0.103436686	0.18947313	0.290110318	0.385609846	0.490118654	0.567080399	0.657653172	0.723204459	0.764294137	0.851435188	0.894378022	0.944501177	0.971174826	1.029432111	1.014707015	1.039822157	1.026759424	1.024455706	0.992379468	0.976082164	0.918334674	0.875225024	0.803364172	0.72993923	0.667337731	0.571111748	0.508604186	0.387587173	0.29701078	0.218496898	0.10478679	0.021112161	-0.104711551	-0.215471833	-0.313578069	-0.412733191	-0.49530994	-0.605363822	-0.688179561	-0.767908274	-0.825254985	-0.876734149	-0.954763418	-0.979075216	-1.020923487	-1.064143061	-1.075311062	-1.082735136	-1.101337821	-1.075586471
0.057017155	0.222832062	0.427165636	0.590611604	0.647398521	0.562871419	0.396397435	0.300901538	0.46675924	0.678743798	0.786787577	0.78346431	0.692140769	0.617519325	0.596291024	0.596721971	0.597220678	0.619616702	0.692721865	0.770992884	0.788150838	0.67908789	0.469375528	0.301531878	0.392984342	0.569291073	0.640337016	0.592379056	0.425801435	0.222791651	0.065773087	0.000218677	-0.061151362	-0.221091473	-0.42617366	-0.589957404	-0.644824121	-0.572713284	-0.395305468	-0.303248001	-0.466530277	-0.684925687	-0.785207565	-0.771116976	-0.691772076	-0.620541864	-0.59593073	-0.596569454	-0.598999243	-0.613452094
0.690909256	0.795863386	-0.136122717	-0.015875952	-1.556943848	-1.902732217	1.575105505	0.022382417	1.950639323	1.103479655	0.415046507	1.95279753	2.228004171	5.226071277	2.171520906	0.636828159	0.551931468	1.279466524	1.729517353	2.211756333	1.830365524	4.786617575	-2.064429894	-0.889390436	0.251452402	-4.1512349	-1.677423082	-0.103731313	0.330547032	-0.125514389	1.128975083	1.763806272	-3.057116717	-1.477346286	1.114968725	2.169504967	1.985245618	2.299099759	0.561450338	-3.467901438	1.861665302	2.543424132	0.748978511	-0.879005337	-1.093867862	0.902562672	-0.755639395	-0.976670806	-1.376650266	-1.596280567
0.020119397	0.103388753	0.200061694	0.292063776	0.38388041	0.440088856	0.46185262	0.483434023	0.493078581	0.508828675	0.576334695	0.650315278	0.751721473	0.848563246	0.919643974	0.948600278	0.923859958	0.863692973	0.761263573	0.647280971	0.574787049	0.509559951	0.484264711	0.480176674	0.465654224	0.442059266	0.380026447	0.29199106	0.203921289	0.100692665	0.022781359	-0.003548442	-0.029164869	-0.098419362	-0.191474754	-0.290850959	-0.376957933	-0.427496463	-0.466796044	-0.467917341	-0.483483949	-0.512183509	-0.581168278	-0.645686908	-0.755868941	-0.841172508	-0.921909682	-0.937833038	-0.925003383	-0.854270307
0.101730756	0.191082434	0.297953769	0.389730712	0.471919232	0.556662932	0.63314098	0.705735516	0.773637446	0.824259016	0.87906544	0.924829614	0.961002363	0.982302129	0.995285717	1.002223418	0.983445844	0.977976634	0.953759106	0.927033088	0.885391261	0.832995053	0.769719806	0.715393821	0.628115933	0.558206084	0.474632969	0.381164004	0.29763226	0.199735153	0.097741757	0.007195848	-0.101323236	-0.194297239	-0.280952603	-0.380478232	-0.465595205	-0.55054885	-0.631644267	-0.704019845	-0.783165764	-0.831807508	-0.872841756	-0.927761308	-0.958269952	-0.980930367	-0.989787993	-1.000069285	-0.999507585	-0.984590497
0.111484832	0.189141392	0.272506259	0.359772129	0.473904782	0.540292748	0.631791698	0.696982033	0.771774316	0.833477094	0.873355589	0.932099054	0.954014635	0.981799748	0.988878941	1.020422583	0.996070055	0.980273328	0.964356952	0.922228579	0.885732687	0.841914041	0.77754296	0.709235749	0.630405565	0.547259612	0.468508644	0.389514537	0.288353948	0.202131973	0.107932798	-0.002598195	-0.099503392	-0.197945908	-0.303934815	-0.377519996	-0.470631592	-0.540591214	-0.62136776	-0.710035058	-0.763104615	-0.833341838	-0.875940395	-0.920847976	-0.956779234	-0.981350521	-0.993649156	-1.000703327	-1.005406393	-0.974902249
0.046130828	0.159105292	0.328257015	0.476003862	0.558094737	0.556328933	0.460913054	0.325356006	0.17764741	0.101360853	0.084646753	0.158423404	0.314840743	0.472267207	0.602882091	0.640401152	0.600407779	0.473764129	0.309439424	0.17401898	0.089664728	0.080405569	0.173181618	0.322146693	0.459180641	0.555066842	0.568332466	0.484393614	0.335787613	0.166610294	0.057175054	-0.010778201	-0.050001721	-0.17365953	-0.322458306	-0.470360987	-0.566151951	-0.559967342	-0.473225888	-0.324155268	-0.194171513	-0.090375236	-0.088080339	-0.1719736	-0.303222909	-0.464638128	-0.591557521	-0.644531283	-0.601506235	-0.480416402
0.091507711	0.197794595	0.285104858	0.377410621	0.481259967	0.567710631	0.634610352	0.704920699	0.761488211	0.846881583	0.895921144	0.91825762	0.969208121	0.989229608	0.991143642	0.997204152	0.982615969	0.972473138	0.956835982	0.915551904	0.865091362	0.835160408	0.78535467	0.705570256	0.841738653	0.548849645	0.479071238	0.381083232	0.294279381	0.203358158	0.096805865	0.004488945	-0.089667775	-0.189683537	-0.286756993	-0.375114843	-0.475260504	-0.539299174	-0.633378232	-0.704636598	-0.786812534	-0.838362379	-0.887381319	-0.915885291	-0.959074741	-0.969019769	-1.005708665	-1.003858345	-0.995743569	-0.983148059
0.099597747	0.199607062	0.297364424	0.388772375	0.480556384	0.552207384	0.640430505	0.698056087	0.774498796	0.816931568	0.883254742	0.919750681	0.954370388	0.990499707	0.98762255	0.998519894	0.99222287	0.990113925	0.973550121	0.918283988	0.885729669	0.831352053	0.780061891	0.703460651	0.630149891	0.559354381	0.478937609	0.393011653	0.274720298	0.200385307	0.114046808	0.000819632	-0.098727616	-0.201017832	-0.295718894	-0.38667501	-0.463358329	-0.546183621	-0.634166838	-0.70841098	-0.769398109	-0.828671082	-0.883118436	-0.919803104	-0.945015418	-0.977171049	-0.997421986	-0.998899532	-0.989889431	-0.972628492
0.196322233	0.381522552	0.531178989	0.618635393	0.683835391	0.702860164	0.716865825	0.691703744	0.705826742	0.722823224	0.75975562	0.823796679	0.881361326	0.946996228	0.991426394	1.02257382	1.000381891	0.966132248	0.894434302	0.837270838	0.770963694	0.733301456	0.720350883	0.715090372	0.72195459	0.730537644	0.703812384	0.642373077	0.533791597	0.371613118	0.206983601	0.005972333	-0.187840445	-0.370181692	-0.519196876	-0.601098383	-0.674797745	-0.671115476	-0.668077566	-0.653140197	-0.666476397	-0.658303848	-0.691833148	-0.751805688	-0.797038665	-0.847824043	-0.904626062	-0.905817672	-0.890177269	-0.84956728
0.092338536	0.197427962	0.298953499	0.382039967	0.462802987	0.549678311	0.643002714	0.71393664	0.772506889	0.830126553	0.883153824	0.937730535	0.953897961	0.977464673	0.993052518	1.00432376	0.988084304	0.980736436	0.964320796	0.913999594	0.88110013	0.832797994	0.790423384	0.697968261	0.307925769	0.555102944	0.463087037	0.37020918	0.294358265	0.201414131	0.104113412	0.007005148	-0.095796005	-0.205689539	-0.285543782	-0.377345546	-0.468036948	-0.553728532	-0.636559871	-0.719002042	-0.761274981	-0.851527606	-0.871495309	-0.922035196	-0.964459345	-0.977597389	-0.991850818	-1.002738722	-1.003544087	-0.972480181
0.115107214	0.197868952	0.274342252	0.368605986	0.459429527	0.555880576	0.622742365	0.717714671	0.78667651	0.819487443	0.895717182	0.917649165	0.949045198	0.985699621	0.985378432	0.985352285	1.008327753	0.98299372	0.971095757	0.940651926	0.885528079	0.874471347	0.768193325	0.699366712	0.640709382	0.552563056	0.47223106	0.381290183	0.304946803	0.195444113	0.109983365	0.006400266	-0.086128292	-0.205137478	-0.299723277	-0.389526483	-0.460152127	-0.574642033	-0.624258508	-0.697681635	-0.765815185	-0.857243141	-0.883869301	-0.901168462	-0.956682006	-0.977199659	-0.967722728	-0.986109121	-1.012799434	-0.962966609
0.099740629	0.201705193	0.282742097	0.380728365	0.471681473	0.551105313	0.627386035	0.702047439	0.773680557	0.835203531	0.891875414	0.926631053	0.956947774	0.976085356	1.001908451	0.999193328	0.993988596	0.981600364	0.962122272	0.919847107	0.886155787	0.832751573	0.770045238	0.709426823	0.637150571	0.557749699	0.472029775	0.379015648	0.285731106	0.197847674	0.099994935	-0.002902639	-0.087498595	-0.196541709	-0.294183988	-0.382642648	-0.468715173	-0.556575834	-0.631634014	-0.703652755	-0.77167838	-0.835021552	-0.883819557	-0.927076537	-0.957355679	-0.979770378	-0.987916484	-0.995808491	-0.999388601	-0.987309428
0.090504768	0.194247069	0.284986914	0.38616324	0.473744	0.564386491	0.636375613	0.710016273	0.772232663	0.836838361	0.901153467	0.948057013	0.983116337	0.990555341	1.002598023	1.029852181	1.02825356	1.004288509	0.986020289	0.966137148	0.911934645	0.86677067	0.819927284	0.731513841	0.663244668	0.5769267	0.48746481	0.411388273	0.308881899	0.199923357	0.108183767	0.01103199	-0.098247267	-0.188471101	-0.304039043	-0.401455336	-0.497468777	-0.582342416	-0.676783219	-0.746350636	-0.825024205	-0.905853124	-0.94782888	-0.999016425	-1.032642737	-1.052593127	-1.078538831	-1.076514949	-1.083010369	-1.059737916
0.096840505	0.193225582	0.284166275	0.384903984	0.472364319	0.568069519	0.642840634	0.719228809	0.787714203	0.854327326	0.891331399	0.943486722	0.976735504	1.001967286	1.019192799	1.03066983	1.016012258	1.01571188	1.010077516	0.960100516	0.916757979	0.876775109	0.803468481	0.733769734	0.660354951	0.583555338	0.49697554	0.401842837	0.298254656	0.197513182	0.097604133	-0.000178792	-0.111614705	-0.207594417	-0.323752662	-0.40960575	-0.500846879	-0.582684456	-0.667746327	-0.76148581	-0.842154254	-0.884931112	-0.95060449	-1.001728347	-1.030823511	-1.047725093	-1.077853714	-1.079883507	-1.073596383	-1.058165332
0.082822611	0.190689599	0.282195695	0.389688067	0.477027343	0.555185885	0.635299632	0.708071805	0.780593967	0.817557784	0.887930488	0.917865841	0.96566658	0.975146641	0.987653881	0.999785524	0.984529344	0.971713112	0.95789227	0.918887109	0.871735369	0.817222067	0.778083226	0.708836362	0.37678968	0.552353049	0.460594668	0.373185303	0.289413875	0.199972686	0.102765913	0.005532336	-0.084843735	-0.186584764	-0.278303767	-0.398343726	-0.47333856	-0.560835007	-0.62695802	-0.70217991	-0.779549926	-0.825230925	-0.872312049	-0.921006058	-0.951948742	-0.976370413	-1.006041751	-0.993497799	-0.992273244	-0.977432161
0.103066857	0.194687362	0.30106956	0.377858246	0.472803335	0.553716343	0.61696065	0.701330414	0.765040411	0.823043004	0.879816129	0.921327053	0.959725716	0.982712256	0.993703601	0.996063226	0.994983513	0.987049638	0.952269067	0.926348612	0.873401809	0.834350521	0.759696289	0.712265094	0.636740278	0.554128528	0.471606499	0.386209937	0.292801215	0.212550893	0.119191842	-0.008131937	-0.098805019	-0.187322612	-0.28105172	-0.379992992	-0.486991339	-0.551624055	-0.620514031	-0.713240226	-0.767344031	-0.834105276	-0.870205435	-0.92414328	-0.954087347	-0.992012258	-1.010199704	-1.002023322	-0.994412629	-0.970948157
0.105551498	0.20508929	0.29807292	0.382030162	0.477535548	0.554457457	0.629892607	0.702133989	0.770402283	0.839537618	0.878929305	0.921383044	0.946173643	0.977741501	0.995594759	1.005127908	0.993180997	0.986633012	0.961400594	0.924673137	0.86807494	0.84055742	0.773848631	0.730325085	0.637146423	0.555404112	0.477304143	0.368951033	0.28697477	0.212528143	0.093532943	0.005397581	-0.095505258	-0.196466007	-0.301077975	-0.3882244	-0.461248118	-0.551628081	-0.633848624	-0.703654212	-0.775876083	-0.824574697	-0.873551109	-0.920506569	-0.961076867	-0.987777259	-0.99650608	-0.990641804	-0.993507695	-0.983370862
0.097675422	0.192926727	0.287508123	0.369293665	0.472948277	0.550693694	0.631682416	0.697405219	0.773973194	0.836751782	0.889214615	0.919040172	0.961311426	0.983151399	0.983946908	1.003594624	0.979660026	0.986501452	0.954922223	0.929074995	0.891902398	0.832173517	0.774119556	0.706130841	0.625004567	0.546023994	0.478510963	0.380730607	0.297370195	0.193314384	0.097971685	0.004498853	-0.085452648	-0.206000065	-0.307093599	-0.400402426	-0.472329152	-0.551649554	-0.622211142	-0.707424019	-0.773684762	-0.832858893	-0.883852173	-0.913331812	-0.963817018	-0.985393766	-0.989804756	-0.998542716	-0.995866491	-0.978085902
0.093128392	0.186150597	0.282762307	0.388051248	0.463778752	0.552786041	0.628862259	0.714588663	0.778270813	0.836231223	0.868680066	0.932785559	0.965217187	0.979629118	1.013944478	0.997446433	0.990863134	0.989046206	0.946974047	0.916275018	0.870172013	0.841005771	0.762766555	0.714653119	0.639847211	0.565082828	0.477356804	0.399684622	0.281701619	0.209380276	0.106627614	0.005816928	-0.089593591	-0.18770483	-0.283061658	-0.366560329	-0.483570417	-0.538012501	-0.620507054	-0.698118069	-0.76211949	-0.828738773	-0.875095	-0.913817532	-0.954740735	-0.968812931	-0.98502772	-0.992463791	-0.990363965	-0.981320277
0.233779639	0.43192033	0.580213949	0.690094719	0.746963195	0.756593415	0.7276635	0.696614562	0.669123745	0.681102485	0.703479702	0.773430492	0.847911954	0.917872969	0.989485286	0.994701145	0.97740451	0.940364308	0.845976892	0.790284606	0.720718101	0.690282668	0.68352094	0.70224483	0.740923266	0.749786616	0.753850478	0.721173742	0.599542462	0.442922474	0.238223918	0.007953909	-0.226265949	-0.423314149	-0.573552311	-0.678092457	-0.713801419	-0.711148961	-0.68905887	-0.640976223	-0.629434986	-0.624320918	-0.658012092	-0.705118394	-0.785715616	-0.827589789	-0.876642862	-0.896777583	-0.87037063	-0.823450732
0.190707629	0.356935528	0.496168688	0.600548647	0.661076575	0.696348885	0.690283568	0.703908953	0.704504009	0.738885578	0.771681545	0.816051912	0.911584957	0.96393734	0.995827215	1.022493092	0.999860849	0.966894191	0.906566662	0.85432283	0.784087506	0.750689347	0.718596092	0.732049348	0.712898716	0.699516655	0.664861189	0.616157524	0.499359248	0.356628168	0.184596648	0.004597504	-0.178453924	-0.341575442	-0.491163116	-0.587415923	-0.612310683	-0.664016763	-0.666113697	-0.670158465	-0.659821305	-0.685358243	-0.703370005	-0.764740533	-0.808353844	-0.864300535	-0.891734973	-0.904642431	-0.887408169	-0.867983604
0.086867578	0.193628656	0.290120567	0.373648234	0.471449357	0.565757107	0.639137227	0.719586215	0.779547171	0.842040257	0.898326623	0.948870209	0.966955881	0.986977407	1.00196581	1.031625409	1.00385674	0.999482657	0.988362961	0.947895169	0.911329352	0.852770578	0.795567065	0.731065423	0.659861975	0.570478886	0.485524038	0.400403701	0.303392508	0.209636268	0.115616131	0.007666557	-0.108065493	-0.210155445	-0.306254259	-0.387705491	-0.483257431	-0.577481533	-0.667897715	-0.74866573	-0.81127719	-0.883718887	-0.926486267	-0.99213231	-1.012049583	-1.049053835	-1.073530063	-1.07243676	-1.051037765	-1.056818823
0.107259304	0.206940363	0.288286869	0.381978071	0.478659649	0.564084305	0.635959845	0.703085264	0.769918038	0.8323241	0.878464814	0.925840394	0.950951827	0.980160843	0.995946541	0.998571114	0.997646864	0.979070803	0.959968614	0.923368471	0.884995147	0.827103164	0.779225372	0.711983221	0.634109515	0.545337288	0.46630844	0.383864369	0.294282394	0.201429842	0.101108419	0.01209497	-0.102163134	-0.19204637	-0.2893863	-0.383246285	-0.471665696	-0.557500778	-0.638376827	-0.704796019	-0.769022417	-0.833452241	-0.888528921	-0.931900371	-0.965341979	-0.98972448	-0.988712246	-0.995309218	-0.994344278	-0.975014577
0.040422707	0.14721886	0.293022614	0.422183498	0.50711244	0.529391629	0.484893696	0.391855682	0.308360292	0.268307661	0.275812862	0.370744467	0.504161409	0.6438388	0.749037227	0.788004297	0.754989295	0.646552443	0.505580489	0.368530819	0.281576663	0.265916088	0.308702667	0.400499794	0.473519	0.529617829	0.511136647	0.430483083	0.285581817	0.151684294	0.046149561	0.00019217	-0.044155983	-0.142124618	-0.293349826	-0.416597656	-0.511475419	-0.525471677	-0.479975323	-0.400760086	-0.31371609	-0.263632953	-0.285162048	-0.366848152	-0.499190685	-0.639180758	-0.751630258	-0.789430961	-0.752477346	-0.647482371
0.099543969	0.192930986	0.28621676	0.388967075	0.489294377	0.556879196	0.635071027	0.709415761	0.766291366	0.831172671	0.882723405	0.926790336	0.955979257	0.983507429	0.993268474	1.004775555	1.000809287	0.993908271	0.953476022	0.929613136	0.880094089	0.830894586	0.789084666	0.6987439	0.626107116	0.547860836	0.472316101	0.372194755	0.309546477	0.192980188	0.097840102	-0.007862274	-0.117936413	-0.199042761	-0.282263679	-0.372049706	-0.47237622	-0.557087325	-0.624867601	-0.69830307	-0.779894093	-0.830463443	-0.878827345	-0.928501369	-0.956729295	-0.979447863	-0.992608559	-0.998834913	-0.995742975	-0.984640977
0.099016517	0.18800711	0.281541378	0.387917622	0.476828297	0.562396567	0.631040011	0.709340613	0.772560879	0.842216697	0.885283163	0.918899561	0.948675042	0.970706152	1.009389118	1.002038028	0.992354702	0.977913881	0.947283786	0.935844434	0.871929013	0.833623359	0.780182731	0.709221986	0.642431191	0.558270138	0.475383421	0.381605232	0.282459578	0.197155665	0.107294499	0.001691867	-0.084991663	-0.199196388	-0.281636971	-0.384163929	-0.473918889	-0.545861221	-0.640195994	-0.71245091	-0.768131448	-0.832527744	-0.883904802	-0.928178063	-0.953604461	-0.97982444	-0.991098202	-1.014123247	-0.985086079	-0.981375172
5.019983508	-2.478936221	5.826881075	-3.912232628	-5.699388365	6.45939217	2.028862073	0.482225228	-2.629284662	-7.685278693	4.074482306	1.718075862	-3.01824708	5.135862927	3.378828729	2.587575907	-5.903875313	-1.263123505	1.506599603	2.836505873	-5.056866887	4.980633173	4.202362871	0.948846759	5.907284636	9.364970685	2.378914829	6.817585314	1.068162366	2.163009112	1.121248647	4.526663807	-6.310642876	-4.482215763	5.92165884	-2.072609294	-4.740614498	2.586715184	-3.169557512	-0.231081805	2.039108414	2.541312887	8.016665291	2.270351932	-1.162287752	4.124736516	4.568403963	0.196745125	-3.792911988	0.01619804
0.097381582	0.19831124	0.282220707	0.398770068	0.467445574	0.548395868	0.643672701	0.707035875	0.766826258	0.84007857	0.881239415	0.929516609	0.959403671	0.974251933	1.000086131	0.999764685	0.989694972	0.973212008	0.957427135	0.922439545	0.889530775	0.838889955	0.771011445	0.699586974	1.061560487	0.565635205	0.463194699	0.384284689	0.295586563	0.200376556	0.095819672	0.012266012	-0.093237407	-0.197030048	-0.296981453	-0.377957672	-0.462995991	-0.544096391	-0.624675077	-0.693003986	-0.776319161	-0.829277316	-0.886688515	-0.918967438	-0.960655698	-0.974031476	-0.980518256	-0.99548542	-1.003387342	-0.985096948
0.221080721	0.432657208	0.597910538	0.701917939	0.74918314	0.758101965	0.713375696	0.701565751	0.66651428	0.670053589	0.712196127	0.769478424	0.84778732	0.917357277	0.969488864	0.988107692	1.001843162	0.934059021	0.866416394	0.789876188	0.728413516	0.705187401	0.684738232	0.723417149	0.7424884	0.766509506	0.751064593	0.721494706	0.588701292	0.440631316	0.235959923	0.0095982	-0.223811688	-0.427105842	-0.590359399	-0.683623413	-0.709467988	-0.727751002	-0.701645501	-0.644534678	-0.63346674	-0.624244629	-0.655057732	-0.710131405	-0.764930199	-0.812894314	-0.863966081	-0.892299376	-0.872292294	-0.832305551
0.099920867	0.193391215	0.291062979	0.395416591	0.478120134	0.560504387	0.631156721	0.723194136	0.782782689	0.847379799	0.899454621	0.944319453	0.980014743	1.002686871	1.022432202	1.025280595	1.026744805	1.01339288	0.994822512	0.965362769	0.915523042	0.863748067	0.809516882	0.749996888	0.667830559	0.577511705	0.501522635	0.408369112	0.305064695	0.204667596	0.106191869	0.003864786	-0.105980674	-0.203813297	-0.305072972	-0.404675036	-0.500926388	-0.594212677	-0.675624049	-0.763780932	-0.82690241	-0.892622594	-0.936888581	-0.998471997	-1.026114954	-1.059023437	-1.078757932	-1.077746595	-1.084027124	-1.065921884
0.096919716	0.183422916	0.291014485	0.378285728	0.468790701	0.54859788	0.628465029	0.712720796	0.769533609	0.825325666	0.884364624	0.91692282	0.950860503	0.984059972	0.987531175	1.00481783	1.005433862	0.989279176	0.955273593	0.912264712	0.893553644	0.825705951	0.764359538	0.709937145	0.892996915	0.56542597	0.468847297	0.385918292	0.289191746	0.197146791	0.11054427	0.006060737	-0.093875489	-0.192384808	-0.281358238	-0.386557338	-0.470035418	-0.557871507	-0.626130865	-0.711520093	-0.77545795	-0.833278506	-0.887550415	-0.920819573	-0.956234676	-0.980273319	-0.992457779	-1.006209306	-1.006215105	-0.97476701
0.101371191	0.192378098	0.289399096	0.384942629	0.474227741	0.545891083	0.640834152	0.70431725	0.772587847	0.823045531	0.876961381	0.922205216	0.962605044	0.976171322	1.000443011	1.002690541	0.98945484	0.97909628	0.95923939	0.929518239	0.874261673	0.831845061	0.771793495	0.70318875	0.635808488	0.551913686	0.483462369	0.384938261	0.28784701	0.192259004	0.090212264	0.005986349	-0.089478025	-0.190720374	-0.291960132	-0.390008183	-0.477745357	-0.558936695	-0.635787171	-0.705098862	-0.766546639	-0.828453166	-0.883966354	-0.923862703	-0.955139941	-0.980843736	-0.993621567	-1.000075675	-0.988501988	-0.982589565
0.053553721	0.196195652	0.370547557	0.509046753	0.557034128	0.470277408	0.281345919	0.095811792	0.291857739	0.482967968	0.570380989	0.533777937	0.41012562	0.268509552	0.196067883	0.194917021	0.202285996	0.270053035	0.401807227	0.537750465	0.577307074	0.494204382	0.297121093	0.101025897	0.278100959	0.471106692	0.553570522	0.517829291	0.377998025	0.199115257	0.051176534	-0.00439318	-0.045646224	-0.193107428	-0.368927171	-0.509520681	-0.553432877	-0.474593401	-0.283791813	-0.092733592	-0.286973652	-0.484860387	-0.574622198	-0.539843827	-0.411634557	-0.27027199	-0.202528879	-0.192675378	-0.202110988	-0.269352371
0.069339286	0.258246251	0.49358953	0.701828136	0.755542589	0.690967281	0.510422162	0.445993505	0.646843773	0.884180654	1.019692794	1.02337146	0.962264161	0.903880076	0.895142087	0.911072043	0.898490779	0.91270849	0.96525569	1.024631411	1.018477953	0.888623863	0.648627256	0.462121174	0.514013991	0.684088383	0.769069398	0.686053059	0.488879654	0.266122977	0.074215915	0.000300709	-0.069314985	-0.257598093	-0.483230327	-0.68518929	-0.752990477	-0.679839154	-0.509966419	-0.44042216	-0.63591779	-0.885370028	-1.021003596	-1.027040288	-0.960633604	-0.90662099	-0.901811699	-0.901069488	-0.893888374	-0.911917289
0.096314585	0.201383699	0.283074612	0.383737987	0.46867746	0.54551398	0.623664607	0.722652909	0.768800408	0.833703889	0.884433541	0.921087775	0.948320614	0.986676054	0.990539419	0.993873537	0.99033971	0.987487033	0.949167533	0.936999553	0.883356302	0.853664444	0.781880958	0.700379187	0.640210663	0.562031635	0.459488669	0.398231274	0.292275512	0.202208383	0.097437851	0.007053109	-0.09328429	-0.198071174	-0.277505736	-0.38196402	-0.469972294	-0.561655707	-0.653460998	-0.70939744	-0.766356852	-0.820836024	-0.877948009	-0.924918826	-0.954244602	-0.990401336	-0.983664969	-0.992534087	-0.983733639	-0.961606786
0.020682471	0.089949635	0.17717798	0.263405128	0.345546918	0.421457296	0.45894344	0.481853714	0.507878123	0.554740474	0.614209547	0.70381775	0.790358737	0.873433898	0.951255935	0.970309629	0.933935607	0.873598279	0.804561658	0.689382392	0.608982632	0.547552006	0.520129123	0.484179055	0.46686211	0.422712817	0.358883285	0.262082308	0.171511927	0.096511381	0.025402645	-0.002690644	-0.006190473	-0.081193208	-0.166165848	-0.261453073	-0.358837445	-0.412149136	-0.453862039	-0.488939585	-0.515301384	-0.546796338	-0.624334576	-0.690360476	-0.798943738	-0.886376384	-0.941159771	-0.967650734	-0.940946675	-0.887814545
0.096931503	0.20735185	0.287362792	0.386774945	0.474830032	0.563255097	0.634609891	0.719899244	0.781865027	0.856531832	0.903132923	0.951533668	0.980170497	1.014787386	1.019915905	1.030039352	1.026099837	1.024475153	0.991286843	0.967389381	0.912630246	0.869373356	0.812375025	0.73226505	0.663476254	0.57592936	0.486090885	0.408917862	0.306134866	0.196205456	0.106102769	-0.002882354	-0.091038668	-0.206460824	-0.307129522	-0.400115625	-0.504674984	-0.596225452	-0.680086157	-0.754399622	-0.831301579	-0.896555734	-0.943398824	-0.983323782	-1.023540371	-1.055112318	-1.06873248	-1.078905524	-1.081112869	-1.061812329
0.229065881	0.42183131	0.552636795	0.595648936	0.5832181	0.584706801	0.593299969	0.638171554	0.70222264	0.783196364	0.876994582	0.935839597	0.931189672	0.905895426	0.910051798	0.876752267	0.899593121	0.928899278	0.931998572	0.921774991	0.864662637	0.79779927	0.708861147	0.630417175	0.584116337	0.581622365	0.587487957	0.590206187	0.549656207	0.416899065	0.23860493	0.008192639	-0.231281332	-0.412195398	-0.54613669	-0.595356503	-0.588910037	-0.583540801	-0.596526861	-0.62399788	-0.704682705	-0.79000227	-0.889741013	-0.928109769	-0.942116678	-0.912714934	-0.896609682	-0.876249554	-0.883839098	-0.92392792
0.070735698	0.26217243	0.499699662	0.680808395	0.756793116	0.683511708	0.511038054	0.462603256	0.638279944	0.885973156	1.016254504	1.031021218	0.960032247	0.912527853	0.892367842	0.91649941	0.898973321	0.908606134	0.964226075	1.024577189	1.01491616	0.885358395	0.655808009	0.45358286	0.518124581	0.676226601	0.76416393	0.68974686	0.502103036	0.271540901	0.075523646	0.002864094	-0.076113244	-0.255097061	-0.496562668	-0.678862967	-0.757080162	-0.68016973	-0.513540369	-0.455799653	-0.651904221	-0.88169097	-1.012246996	-1.031012842	-0.969074467	-0.906851363	-0.901372151	-0.899210483	-0.899917281	-0.909197488
0.110108641	0.205739353	0.281807438	0.38993835	0.468454523	0.554396696	0.639718781	0.703087041	0.762685357	0.834726089	0.886064091	0.927935985	0.961075414	0.97319103	1.007909996	1.00116636	0.994037334	0.966445683	0.934484872	0.928306992	0.864403935	0.840029814	0.769608982	0.71684137	0.624323574	0.555575944	0.471076773	0.394807206	0.29973196	0.18251327	0.102639522	0.01222407	-0.10297331	-0.18848204	-0.282270799	-0.380437289	-0.45462377	-0.565574452	-0.644349017	-0.70171876	-0.766390332	-0.820960438	-0.879067531	-0.911940507	-0.962974986	-0.992377277	-0.995811349	-1.019414888	-1.007910816	-0.982092983
0.072525262	0.250931555	0.478523964	0.662719968	0.72175994	0.661484334	0.477693573	0.41703568	0.603193966	0.83444186	0.953097454	0.968568006	0.891305361	0.830402823	0.833115691	0.82667925	0.821044582	0.836541216	0.893859761	0.960058826	0.959999011	0.836823864	0.611650776	0.411120457	0.481841416	0.64673859	0.721526905	0.659162089	0.482610981	0.252591604	0.074113641	-0.008488527	-0.062093639	-0.256114317	-0.473488329	-0.655297203	-0.730930612	-0.658947436	-0.483521477	-0.412944776	-0.598841969	-0.826592317	-0.953026164	-0.96446447	-0.886455854	-0.836337596	-0.829607693	-0.841718446	-0.833883312	-0.836381935
0.098372411	0.196911852	0.288277469	0.393601362	0.470677112	0.547225645	0.626745584	0.708127266	0.767759012	0.841011392	0.880214977	0.916830488	0.961806376	0.96788897	0.985459351	0.992848832	0.991058932	0.984739709	0.962686502	0.931986522	0.879158519	0.821894429	0.774619566	0.690865786	0.626056162	0.560478281	0.469839353	0.369669561	0.29133199	0.196487395	0.101724533	0.011347264	-0.086958149	-0.202418004	-0.284134788	-0.381562225	-0.478501863	-0.555283859	-0.640184171	-0.71107435	-0.770247163	-0.829177148	-0.879469454	-0.922906753	-0.970897605	-0.993177202	-0.992559488	-0.984734178	-0.994570198	-0.97188227
0.060836464	0.256620042	0.494897181	0.674488524	0.750023835	0.675732223	0.502474174	0.449337926	0.636754633	0.867936954	0.991292181	1.011089112	0.946921414	0.891042598	0.881124368	0.881379086	0.886451682	0.894237527	0.943263559	1.00260508	1.00530247	0.871785043	0.634324068	0.44331074	0.504003211	0.670631355	0.760200762	0.681975372	0.481945962	0.261440184	0.073331488	-0.005155555	-0.063019504	-0.250325214	-0.487658745	-0.680225291	-0.748745919	-0.672970228	-0.496780083	-0.44172469	-0.633485713	-0.871157479	-0.998044113	-1.00536614	-0.942821429	-0.90169994	-0.888998571	-0.886374579	-0.880676692	-0.891165413
0.08986643	0.199226032	0.289577157	0.369231657	0.468060691	0.561674498	0.633712491	0.703986695	0.767346636	0.833335816	0.878477558	0.928959724	0.962366754	0.987909729	1.007554828	1.000999125	0.999128404	0.971913836	0.96074521	0.919616185	0.893501377	0.841258944	0.769667031	0.705351014	0.638617373	0.561280206	0.474972383	0.384432853	0.288069199	0.186238307	0.10932738	-0.005810548	-0.093581074	-0.186827414	-0.279178695	-0.37357151	-0.466298198	-0.556715515	-0.648893297	-0.700205143	-0.765301624	-0.832126357	-0.87378649	-0.935012979	-0.964249288	-0.976461299	-0.994557419	-0.992773328	-0.988009346	-0.977514468
0.090952507	0.200537381	0.285042799	0.389951269	0.47125915	0.550719183	0.636975857	0.702872127	0.773764249	0.831948359	0.886698542	0.922229059	0.955866832	0.977323434	0.990471662	1.004905404	0.997330402	0.984922699	0.953310475	0.921572236	0.876266893	0.831343935	0.774319319	0.708345144	0.644895815	0.552901044	0.470043506	0.375010377	0.291056825	0.197070877	0.096259546	0.002488352	-0.100461623	-0.198130378	-0.285804901	-0.379516236	-0.4764393	-0.550496336	-0.633112224	-0.698523511	-0.769417295	-0.832168373	-0.882774845	-0.923124539	-0.965094218	-0.978924281	-0.987873986	-0.997792994	-0.986541448	-0.96963244
0.271559361	0.470599789	0.621971888	0.643606747	0.641325725	0.601302273	0.57424864	0.612689362	0.678500312	0.769019335	0.873337406	0.930489774	0.934365296	0.893645683	0.868654494	0.860356284	0.856226687	0.902109893	0.925100508	0.927768532	0.872399121	0.794381986	0.682982941	0.594325118	0.573859355	0.577715081	0.633386639	0.659994982	0.618438924	0.483648723	0.277025317	0.014217807	-0.264281003	-0.473132857	-0.621051932	-0.659180262	-0.622438618	-0.585088153	-0.581902018	-0.59863853	-0.696787067	-0.792293743	-0.866617174	-0.919787004	-0.929009476	-0.907530259	-0.870334112	-0.855525407	-0.85841584	-0.900492991
0.099542282	0.200863146	0.290058761	0.384194736	0.480852174	0.547394228	0.632572688	0.701187515	0.768439123	0.835983912	0.883336667	0.924723253	0.948623265	0.991410844	1.000781914	0.997139799	0.997078867	0.979315369	0.956635129	0.916512105	0.879077728	0.829456079	0.77138156	0.710927599	0.629995317	0.547357722	0.477016727	0.386518996	0.288404287	0.191705111	0.102993223	-0.003131959	-0.096719557	-0.198590194	-0.280961538	-0.389204169	-0.474405564	-0.556144277	-0.63821577	-0.705361713	-0.76973371	-0.831768682	-0.880699356	-0.926185096	-0.966109234	-0.979496756	-0.989119145	-0.995071486	-1.003818869	-0.985647161
0.102755525	0.196995323	0.292690023	0.389660442	0.462998749	0.559495538	0.631970414	0.706160307	0.773659563	0.827289798	0.882403451	0.927421293	0.956991944	0.982695674	1.009387266	0.996345989	0.997797809	0.977449224	0.958520267	0.916470697	0.889250581	0.830100417	0.78596325	0.706276598	0.629579931	0.556652541	0.476491048	0.385440379	0.296504487	0.205206598	0.097475332	0.005846757	-0.083275436	-0.200718595	-0.287828617	-0.374989235	-0.466875948	-0.553705153	-0.633685058	-0.703125545	-0.7748314	-0.828549074	-0.875277759	-0.921494131	-0.957300092	-0.98016713	-0.996833058	-0.993432872	-0.998441639	-0.98244221
0.101421337	0.186750723	0.286345176	0.380987341	0.482582896	0.559740491	0.621041412	0.708708725	0.773867568	0.833919434	0.88679479	0.932319561	0.969561231	0.971868007	0.987244706	0.994776803	0.996179193	0.981571208	0.940424417	0.916516392	0.878104561	0.826027948	0.76663857	0.70270592	0.639835998	0.570049726	0.480558716	0.406006697	0.29602843	0.188102822	0.098970139	-0.004382065	-0.076300067	-0.190837525	-0.280729033	-0.383563784	-0.471522234	-0.558240352	-0.628250747	-0.725333114	-0.759857804	-0.833892245	-0.892439163	-0.91689113	-0.977524893	-0.966852853	-1.000236298	-0.981383971	-1.001263378	-0.980326861
0.069872314	0.260763461	0.512735227	0.699065867	0.776671453	0.704582318	0.532913025	0.480028613	0.675354346	0.927631174	1.059622629	1.074003138	1.002898059	0.956697269	0.958696288	0.966773443	0.951079815	0.961146114	1.007147721	1.070511045	1.048040932	0.930530568	0.678224684	0.480626551	0.535053274	0.702458381	0.781278045	0.707768675	0.505833457	0.271774642	0.076911973	-0.008762511	-0.073580122	-0.270247783	-0.500648088	-0.708555671	-0.78324538	-0.702920163	-0.541773528	-0.469387959	-0.671910649	-0.922203747	-1.055033683	-1.067553842	-1.022698893	-0.956282227	-0.953517775	-0.9515469	-0.954449314	-0.970480452
8.104010479	6.162458923	-4.767222063	3.685582128	-5.945850108	-5.869859273	5.092941626	-5.10796546	2.079290049	8.839687763	-3.210415091	-3.019791699	1.087645102	-4.984653644	2.425472021	10.27708127	0.301887162	-1.569412098	3.399698192	2.837294128	7.854834978	-1.318448919	3.871344816	8.522468506	5.497227408	-6.217917514	-0.93359054	-4.158616792	0.6840944	1.073821863	3.273379947	-0.08591566	0.993227594	-0.467271222	-9.723485002	-4.597825599	-1.806102906	-3.027337126	0.953582994	-3.668975437	-0.766363883	-5.69380105	-2.409512869	-10.88599512	-5.901595884	-0.600767453	-4.066819067	0.282213898	2.864158078	4.43214614
0.094189845	0.185990532	0.283065131	0.382601055	0.485330036	0.549326479	0.628770992	0.699853028	0.759854675	0.832309188	0.878948805	0.898366423	0.961931219	0.983577604	1.000151697	0.999016966	1.015322068	0.984980785	0.966233686	0.914078879	0.898794	0.828419429	0.764349956	0.715807784	0.623171367	0.562581837	0.472547723	0.379387405	0.29016155	0.206422185	0.085270929	-0.002086091	-0.083718078	-0.188880089	-0.303399122	-0.376901565	-0.471615437	-0.558581797	-0.624161589	-0.711107219	-0.780999744	-0.833405739	-0.886351598	-0.92653992	-0.94916802	-0.971053777	-0.986980768	-1.006967905	-0.985563442	-0.983598887
0.105450737	0.196165813	0.304114032	0.397169756	0.466140198	0.556001858	0.639654297	0.714481165	0.778723173	0.827256296	0.867664159	0.908289013	0.957682155	0.984204176	0.989353432	0.992519707	0.99065229	0.983838962	0.967397408	0.951630485	0.884493416	0.834673538	0.770800062	0.712277422	0.628096037	0.54529942	0.473426292	0.399488163	0.287966879	0.19345023	0.0962604	-0.009321442	-0.097091	-0.191391888	-0.268098357	-0.379128679	-0.459837018	-0.550913177	-0.641035998	-0.694767123	-0.77193063	-0.838301461	-0.869267566	-0.937679892	-0.959117987	-0.977636376	-0.98367079	-1.003887941	-0.998662359	-0.979716312
0.089559108	0.192774703	0.293011202	0.380399911	0.466480308	0.556764403	0.640877886	0.721903233	0.779988493	0.847092529	0.900764521	0.944955815	0.987282865	1.009751054	1.037359527	1.028209542	1.023382048	1.019783536	0.986380604	0.954860406	0.915778417	0.869303022	0.798817165	0.7507849	0.671154383	0.586039897	0.49000926	0.401867266	0.296081353	0.203822493	0.102881917	0.003263367	-0.090957779	-0.198712409	-0.305838691	-0.397584145	-0.505839176	-0.597167325	-0.666259679	-0.758898073	-0.828458477	-0.890588912	-0.944775569	-0.993989191	-1.031962752	-1.048368525	-1.070341953	-1.076116147	-1.080274242	-1.064561529
0.107351773	0.206241683	0.28775966	0.376422217	0.463017102	0.545790626	0.63928092	0.71503111	0.777496729	0.835166121	0.883784505	0.914763625	0.95577574	0.979398244	0.99394553	1.002829756	0.990865224	0.98067439	0.95724906	0.922129795	0.869256352	0.826883944	0.767151986	0.699338904	0.34732909	0.564267333	0.479259648	0.378995	0.292439471	0.191169724	0.099210048	0.014119181	-0.093946499	-0.185843734	-0.27270308	-0.374222486	-0.45827901	-0.558794988	-0.630452563	-0.706267792	-0.776650982	-0.825171673	-0.873274421	-0.928299746	-0.947700695	-0.979334999	-0.99613118	-0.995908361	-0.992181838	-0.979987377
0.0991843	0.178428012	0.278527939	0.378237785	0.4661594	0.540066968	0.639505464	0.705423715	0.777449611	0.823532832	0.878412725	0.923171165	0.967265462	0.976126733	0.984864036	0.988246871	0.993855929	0.975742726	0.946306653	0.919961324	0.885802817	0.83621153	0.780389804	0.713157186	0.655431164	0.548013655	0.466897968	0.38039025	0.286019595	0.191541973	0.110850616	-0.00149443	-0.092915314	-0.190394536	-0.283933088	-0.395473446	-0.472184642	-0.54763555	-0.62932814	-0.690243974	-0.778920636	-0.824624039	-0.886284345	-0.922023218	-0.943312373	-0.982188676	-0.993779344	-0.989194849	-0.99693682	-0.974497756
0.109239474	0.185745978	0.294623651	0.393030418	0.471742798	0.550385303	0.623432918	0.708443697	0.773704474	0.828938552	0.88787299	0.943347673	0.951420854	0.977039035	1.011049354	1.009697529	0.995717539	0.982883899	0.952742742	0.928548927	0.866808347	0.830922836	0.773118786	0.717205088	0.63734774	0.559778276	0.466386077	0.383040283	0.294562922	0.205867038	0.10130575	0.005762181	-0.109270171	-0.182754825	-0.29508732	-0.384595076	-0.484323426	-0.549598039	-0.614490876	-0.700099801	-0.769220512	-0.839897119	-0.881206114	-0.920202212	-0.957495094	-0.98614902	-1.010140661	-1.007390574	-0.985302305	-0.99341379
0.103042647	0.197690104	0.294697529	0.388198565	0.485989432	0.543741469	0.627838484	0.698034907	0.775484948	0.821691469	0.885109902	0.917505509	0.95913482	0.984750566	0.992746666	1.008229664	1.006058712	0.98658296	0.953984951	0.920106081	0.881842902	0.837102536	0.776060824	0.717408743	0.924196858	0.555141075	0.460658871	0.377097723	0.279085022	0.201437561	0.090578872	0.008766636	-0.098843999	-0.190628067	-0.282740907	-0.375066064	-0.466814594	-0.550960275	-0.629693364	-0.701105855	-0.777183788	-0.827287575	-0.871195978	-0.922466912	-0.948405513	-0.973681704	-0.997916094	-0.996564669	-0.991738794	-0.973929576
0.107913363	0.18786675	0.300618967	0.377831102	0.473597562	0.572857318	0.642597471	0.707602321	0.778826464	0.830595803	0.882950308	0.9235115	0.957798792	0.985544743	0.991643598	1.002915128	1.004933332	0.977999226	0.954667709	0.925927719	0.89473481	0.835644822	0.763107456	0.724169526	1.048228986	0.545405749	0.464433447	0.392412327	0.289774319	0.197342417	0.086737951	0.00686494	-0.10363068	-0.186637446	-0.288836017	-0.376625341	-0.469836758	-0.551833284	-0.628610839	-0.711463786	-0.764936664	-0.830904226	-0.882889018	-0.923310479	-0.962801019	-0.97429301	-0.997055467	-0.981487796	-1.000011442	-0.980409172
0.10243313	0.196549177	0.295528695	0.386031531	0.473208483	0.557911341	0.627187619	0.715310755	0.771072294	0.822079066	0.869738619	0.928499948	0.962818464	0.979355336	0.993978523	1.000502382	1.002101533	0.987113292	0.966264307	0.910971004	0.874531757	0.836655431	0.777633025	0.693596655	0.626479088	0.564801316	0.473192815	0.38683744	0.290450898	0.197077664	0.089636017	0.005608345	-0.082391537	-0.205373673	-0.295134926	-0.382162706	-0.468333811	-0.546971723	-0.646854185	-0.703466115	-0.769228323	-0.825232774	-0.884738707	-0.9247634	-0.951241543	-0.971920811	-0.998911382	-1.008428343	-0.994309934	-0.989418369
0.102495877	0.18690092	0.28754338	0.378544084	0.478245299	0.557699059	0.634261888	0.703139655	0.778780434	0.83620112	0.878307474	0.927987258	0.955100755	0.977649223	0.993342494	1.000051618	0.995120846	0.980972818	0.954774143	0.92257476	0.890954137	0.832199289	0.776462439	0.701865689	0.636673599	0.557086564	0.472868365	0.382437097	0.296337759	0.196382346	0.092270755	0.003202384	-0.092668389	-0.196922188	-0.289179127	-0.386160447	-0.47112089	-0.559605383	-0.635475896	-0.701134179	-0.774926009	-0.83007397	-0.879137705	-0.917889554	-0.952646361	-0.976878489	-0.99618786	-1.003961276	-0.994668567	-0.984810631
0.098619882	0.178164001	0.292033262	0.38871258	0.478564713	0.559928716	0.639341356	0.702914245	0.785661052	0.830917985	0.881462927	0.94189247	0.96822423	0.996263419	1.009610709	1.028576781	1.013157953	1.011588785	0.9782154	0.957883747	0.888762127	0.85926892	0.796777282	0.729653054	0.659311562	0.558703315	0.47815147	0.394268943	0.305364348	0.197498388	0.105536112	0.00043196	-0.100637327	-0.203414052	-0.303093839	-0.399790945	-0.490273798	-0.585471768	-0.664107832	-0.740994058	-0.80855028	-0.885036607	-0.915040358	-0.972740703	-1.008043742	-1.035112324	-1.055175551	-1.062937143	-1.060406877	-1.046998398
0.071688122	0.259376517	0.500132155	0.702348023	0.780986354	0.710201891	0.522614354	0.472624933	0.673964627	0.902777615	1.052598613	1.062208508	0.99208043	0.941382134	0.934371993	0.942366741	0.934651314	0.950968534	0.996979967	1.054481195	1.04742833	0.915729729	0.671793756	0.48476865	0.518458148	0.692955388	0.773177996	0.712230135	0.503892983	0.25770976	0.069718264	0.006449496	-0.072930248	-0.253845502	-0.494132842	-0.697576986	-0.76929628	-0.696272852	-0.52936065	-0.469612824	-0.664492097	-0.909311377	-1.040491965	-1.053745312	-1.004668692	-0.947934352	-0.940155894	-0.947210147	-0.952222976	-0.951965924
0.10029587	0.209091058	0.293351264	0.405103738	0.477457979	0.576031414	0.646616521	0.718298496	0.789081805	0.843417006	0.896456662	0.942508873	0.977694	1.014222179	1.024120529	1.040911995	1.023267002	1.013742277	1.000007288	0.962940772	0.921274368	0.873703256	0.816164423	0.718189324	0.658334939	0.588697325	0.500446581	0.390952197	0.301198654	0.202030338	0.114432795	-0.008432636	-0.104558065	-0.210217166	-0.308783417	-0.404367636	-0.496551619	-0.613942301	-0.662093264	-0.746945233	-0.823079436	-0.891856839	-0.945945811	-0.996877752	-1.027204175	-1.052941791	-1.069684472	-1.082337089	-1.085196112	-1.059463468
0.040717745	0.1476561	0.283305425	0.412050276	0.503426085	0.526715561	0.481285212	0.39977015	0.332051128	0.293736408	0.306792988	0.397251637	0.533004903	0.654976572	0.766039986	0.815374878	0.76538733	0.675453324	0.525666054	0.397446457	0.321085491	0.286803614	0.323807953	0.409942361	0.470176181	0.516976991	0.491198797	0.414211956	0.274971099	0.142577496	0.038131374	-0.000662799	-0.041027368	-0.147787471	-0.28496061	-0.401103788	-0.495594483	-0.513222423	-0.483179738	-0.403056041	-0.330883593	-0.291550634	-0.310464098	-0.401706813	-0.521867012	-0.66548457	-0.775767389	-0.810069047	-0.769344833	-0.670169441
0.099690652	0.194567064	0.279719579	0.38022567	0.468735532	0.547247265	0.630494686	0.70170624	0.774202639	0.828299552	0.895431022	0.922716489	0.954813135	0.985911279	0.998807805	1.005757971	0.995188569	0.978584442	0.96303542	0.926722923	0.879851575	0.82746277	0.773982207	0.707696238	0.639053215	0.557244941	0.478295809	0.382689138	0.292590487	0.190752534	0.098831216	-0.002029708	-0.090676484	-0.201402131	-0.288678935	-0.378316829	-0.470523063	-0.564094412	-0.630882018	-0.705329132	-0.765602565	-0.820071658	-0.871632774	-0.933819337	-0.952175629	-0.981924032	-0.983528922	-1.000039959	-0.993200899	-0.978889879
0.044079605	0.165318855	0.315151925	0.461322994	0.538659496	0.543427025	0.468130442	0.34501395	0.239226227	0.159289287	0.163043015	0.246230717	0.381911099	0.539567092	0.65614253	0.708258793	0.660076875	0.54028532	0.391893983	0.243928906	0.154758356	0.158950118	0.234862523	0.344036113	0.470285631	0.539884924	0.546709233	0.463557724	0.317029554	0.161983313	0.047223214	-0.004938227	-0.043528999	-0.159461566	-0.314456317	-0.456623265	-0.541051392	-0.547471116	-0.470765484	-0.359969989	-0.23649997	-0.158993004	-0.165122032	-0.244970867	-0.385082007	-0.542274174	-0.655552716	-0.702339325	-0.661484126	-0.548409455
0.10560872	0.197451317	0.293978514	0.370792729	0.453930146	0.566671266	0.629469214	0.706458904	0.766880207	0.830313477	0.871846775	0.938811394	0.945018514	0.974553143	0.980204132	0.982170562	0.986888964	0.976667444	0.95703712	0.927972388	0.884919459	0.836301143	0.761812231	0.703877441	0.639202577	0.541293534	0.466114513	0.370048521	0.288936378	0.197916336	0.096625466	-0.015697454	-0.08613186	-0.191390292	-0.291674826	-0.380023971	-0.469256596	-0.551678972	-0.644407494	-0.713939688	-0.784169282	-0.834917712	-0.87856381	-0.924789291	-0.948006032	-0.977120161	-0.990797095	-1.007176832	-0.974628865	-0.986671738
0.078085075	0.208430248	0.283231002	0.398709321	0.475881853	0.560144655	0.646233415	0.726484017	0.782878564	0.843791136	0.887330985	0.9360202	0.984635648	0.991462352	1.023004304	1.037876395	1.018937259	1.002751401	1.001600797	0.96918963	0.904182679	0.862476796	0.801391713	0.727185191	0.665045946	0.588543028	0.495179913	0.420422355	0.314660419	0.198914478	0.122142682	-0.003433353	-0.121731563	-0.204818477	-0.321199256	-0.403631093	-0.493711882	-0.584189251	-0.678681036	-0.753910096	-0.830576258	-0.913937589	-0.949294952	-0.987861482	-1.015813597	-1.057578162	-1.076872105	-1.077792919	-1.077077977	-1.045097801
-0.892698428	4.125572732	-6.258863713	-11.86930642	-4.871032841	8.365093859	-4.297679755	-1.254264186	1.687726859	-4.225521893	-9.7166273	-6.131753348	-0.216096176	-0.69152305	12.43466702	-2.329977249	3.884005354	8.737866128	11.23618998	6.212371041	1.520536064	4.581641088	4.727882448	1.704757309	-4.855154918	6.927973942	9.64601639	-2.321636798	-2.35362805	-9.778441356	-6.445827753	8.441662584	-2.036366125	2.049023123	-0.614186807	2.922642459	4.484923701	10.01851092	-6.217856993	-4.353620129	1.55388435	2.569577167	4.126264664	-0.568088665	-7.199967491	-3.075487166	-13.84586722	4.659769172	4.926632041	1.551472623
0.097494879	0.210975713	0.289239351	0.37630199	0.472019689	0.557103862	0.634397512	0.723614727	0.783440188	0.841159815	0.90907536	0.941552719	0.977192617	1.003234282	1.017395969	1.036001133	1.023839137	0.991270071	0.987332204	0.94411571	0.912572439	0.860733339	0.802483571	0.731868972	0.654179529	0.5907451	0.498746231	0.399780728	0.321162602	0.222830277	0.110705721	-0.005314215	-0.115966672	-0.210091263	-0.317085903	-0.404906556	-0.51158805	-0.578921428	-0.663188592	-0.744031839	-0.827297665	-0.878716835	-0.946588401	-0.975608945	-1.027124234	-1.042886933	-1.083867044	-1.075939085	-1.070697994	-1.06455285
0.106406936	0.215057636	0.287842083	0.368627393	0.482349495	0.56288139	0.640353812	0.712795757	0.780698558	0.838383825	0.884080684	0.923409089	0.950349659	0.975601672	0.99705522	1.009344043	1.001235837	0.986655941	0.944171989	0.930396986	0.891761856	0.823072737	0.786631198	0.704078557	0.631088791	0.560917955	0.475096208	0.385405185	0.294288492	0.194818267	0.099922798	-0.00344388	-0.09218877	-0.201266802	-0.284227368	-0.374373248	-0.474827878	-0.547947763	-0.624357262	-0.697237687	-0.785580633	-0.845784362	-0.873130548	-0.930825383	-0.955136806	-0.98098872	-0.98557088	-0.994647886	-0.991160199	-0.966949967
0.10415773	0.196534697	0.284929819	0.390146195	0.479495228	0.549927995	0.629868455	0.717639174	0.782140046	0.840740379	0.878834271	0.930317278	0.948021974	0.9958497	0.981116511	1.005373429	0.995864268	0.990393359	0.96108768	0.926097162	0.893871335	0.834506455	0.770347666	0.715357728	0.637034866	0.566662959	0.471096482	0.388354062	0.284625484	0.203872056	0.110289505	-0.003015659	-0.086359116	-0.189371371	-0.295634788	-0.387857029	-0.45442777	-0.556814716	-0.62885894	-0.710777874	-0.772584137	-0.826443841	-0.881752261	-0.927707631	-0.950522146	-0.984083402	-0.984637709	-1.002380656	-0.993044487	-0.978219287
0.10823314	0.18677081	0.286130551	0.383703767	0.481830452	0.551285523	0.634351734	0.698863593	0.772975597	0.830872839	0.864935947	0.928661675	0.962308457	0.976567278	0.987894174	0.998529011	1.00473888	0.9813518	0.957915028	0.916986264	0.889065503	0.831392847	0.760098726	0.707891389	0.642101785	0.560108453	0.473237258	0.383830925	0.285295926	0.192784302	0.099342724	-0.002016205	-0.114493524	-0.189788875	-0.286836456	-0.378277143	-0.470503011	-0.551270676	-0.633262599	-0.701153859	-0.781140918	-0.822290391	-0.880463798	-0.918253317	-0.956117392	-0.978057897	-0.986717188	-0.989988183	-0.98988814	-0.988881964
0.096111565	0.19616856	0.294267827	0.389900446	0.481954062	0.570441385	0.643153821	0.723554518	0.794214297	0.846956999	0.895516226	0.943882308	0.988408548	1.011566273	1.030334002	1.026862503	1.031620715	1.011189427	0.98731362	0.967299665	0.92188311	0.867143507	0.822830261	0.734837489	0.667876159	0.584224909	0.503390202	0.406131534	0.316670254	0.207327005	0.112668459	-0.009079233	-0.107627435	-0.204111084	-0.304243235	-0.412829519	-0.506679398	-0.588024717	-0.677314252	-0.759771494	-0.823557703	-0.879010241	-0.94915167	-0.999283233	-1.035446542	-1.053631025	-1.071765288	-1.075594148	-1.082583604	-1.064117899
0.215016584	0.39719412	0.55403138	0.670063977	0.719802453	0.73054205	0.717515979	0.703865442	0.681775712	0.706324992	0.726567205	0.808550672	0.871064704	0.932758596	0.991778553	0.991832113	1.003420245	0.945495083	0.889788714	0.810258497	0.75134267	0.69333237	0.70818006	0.718140114	0.7242503	0.730898246	0.723181141	0.67977684	0.575737765	0.408448514	0.237567775	-0.011392288	-0.210774281	-0.410510264	-0.552001572	-0.64633835	-0.697505458	-0.709700399	-0.681250942	-0.646096198	-0.635761714	-0.638480777	-0.675830833	-0.722618932	-0.783671978	-0.83485873	-0.875077216	-0.902684881	-0.889406098	-0.836068984
0.10981089	0.192766927	0.292194778	0.382517827	0.474262178	0.553564094	0.628469849	0.708253338	0.756551284	0.823394865	0.889500562	0.931464948	0.962777751	0.96780156	0.997905683	1.000746958	1.002754593	0.98056403	0.951683563	0.913845803	0.883016373	0.840320161	0.776784112	0.71422068	0.638422889	0.563108685	0.483745856	0.377336912	0.288699619	0.203762586	0.1022557	0.007134765	-0.096260838	-0.193740239	-0.293235651	-0.387521213	-0.472354455	-0.54989227	-0.631692749	-0.709513137	-0.77222231	-0.836142562	-0.881230247	-0.921164768	-0.955683272	-0.977103736	-0.995046207	-0.992332696	-0.991949352	-0.987386508
0.109594562	0.208070636	0.293909296	0.375784201	0.471038039	0.559861798	0.655093364	0.712663628	0.766182811	0.831834644	0.891705611	0.932069668	0.963628549	0.981865267	1.006899865	0.999634273	1.003675036	0.984219683	0.955326788	0.922688023	0.882144508	0.829594221	0.779316643	0.702323983	0.633182284	0.564671843	0.474653786	0.388051552	0.295817762	0.20216896	0.097186585	0.011461279	-0.099254997	-0.204121526	-0.301731522	-0.381585178	-0.464152714	-0.55549935	-0.63113936	-0.701187961	-0.76811563	-0.813654964	-0.888017528	-0.937837992	-0.959472382	-0.978074577	-0.991598222	-1.003042488	-0.991701593	-1.002385392
0.089742317	0.194843445	0.302555666	0.380272505	0.473070439	0.558914936	0.621976469	0.711486243	0.768147516	0.825196556	0.879884984	0.920241173	0.957420329	0.97568564	0.998386646	0.998024359	0.996941178	0.980123747	0.959405966	0.911955758	0.88124791	0.832819909	0.775452278	0.699729915	0.644026923	0.558172489	0.466904929	0.378975071	0.291082611	0.204026651	0.09433767	0.006949418	-0.103126312	-0.19382122	-0.283709254	-0.378932136	-0.460358196	-0.560142815	-0.631533981	-0.712614427	-0.778598224	-0.833519736	-0.876069457	-0.915653907	-0.963495373	-0.98054855	-0.994436578	-1.002784589	-0.995749372	-0.981263351
0.091107658	0.195148857	0.296338268	0.380378205	0.482172104	0.557534694	0.631305193	0.713390871	0.767539723	0.844896464	0.885631067	0.921656267	0.969254011	0.989925004	1.012696753	1.02032131	1.01572969	0.997833055	0.966031038	0.942979992	0.897176176	0.832880738	0.802858803	0.731325285	0.652761728	0.581390612	0.489760826	0.402978076	0.305765432	0.179916308	0.115130248	0.003915748	-0.093196612	-0.203074626	-0.30203446	-0.38959422	-0.499066967	-0.58495881	-0.669076043	-0.73070062	-0.799704919	-0.869449046	-0.933455495	-0.971001419	-1.01578534	-1.032946654	-1.04275219	-1.048267745	-1.06186114	-1.043428843
0.069298703	0.266062049	0.495332474	0.704434463	0.779875868	0.70303073	0.518110954	0.467389922	0.674155247	0.904867907	1.045699009	1.053096282	1.000321631	0.946654447	0.933749194	0.942543188	0.938027306	0.939922365	0.994376533	1.053826172	1.048104411	0.913735503	0.674251775	0.475409703	0.532775398	0.696554875	0.779894061	0.714351275	0.507211531	0.269058565	0.081764595	0.001274387	-0.065267952	-0.258819861	-0.501836429	-0.699173427	-0.764626697	-0.700942801	-0.531160073	-0.471522961	-0.663340985	-0.915944	-1.045298201	-1.06286223	-1.007333105	-0.938016005	-0.926262888	-0.946528592	-0.929720096	-0.942110646
0.106820361	0.195786577	0.302817263	0.389899182	0.472801534	0.567160329	0.645065928	0.707922352	0.79450611	0.85437292	0.894903485	0.94032593	0.978714958	1.018370595	1.014760415	1.017297666	1.02785398	1.016418775	0.99999389	0.963264155	0.907011215	0.868617691	0.80685824	0.745396457	0.665363348	0.579286295	0.499382463	0.407915414	0.320539325	0.203789078	0.092338661	0.008218338	-0.101497317	-0.205858946	-0.306931358	-0.397883053	-0.512850716	-0.598870014	-0.690930684	-0.749952941	-0.834759841	-0.897121942	-0.944043555	-1.014834807	-1.034201779	-1.076377363	-1.093341384	-1.081556264	-1.089706643	-1.077815627
3.611583027	1.885557501	-0.90327255	0.02653618	-1.555587124	0.791403636	1.35448626	2.835178462	1.14389118	0.347625632	3.580832978	-4.464482611	-1.81551631	-2.025504532	1.884514612	0.616653102	-0.871529001	2.475492021	0.09049342	3.274127934	1.166936474	3.341050457	0.699248344	1.352518768	3.340076402	1.512573612	-2.629802236	2.02818744	2.269222433	1.781306599	-0.422261482	-3.041962447	-1.525517976	-0.936843261	-4.035730605	-0.549377275	0.985159639	-6.188403624	-0.930224812	-0.403326575	-0.700877972	-1.983420115	-4.028598769	-1.666424205	3.570280091	-2.340389642	-1.672829132	-1.606070919	-5.0765576	-3.931441042
0.091748821	0.185981273	0.304371666	0.375238007	0.478168586	0.573354304	0.655122999	0.710291742	0.8011075	0.852265676	0.921987492	0.940558437	0.994872756	1.0012109	1.014727682	1.020180899	1.008447465	1.020088826	0.993344955	0.958334	0.923551535	0.849600309	0.81233441	0.738679909	0.648767521	0.586127526	0.493537044	0.416035337	0.299848782	0.213037595	0.098469321	-0.004984572	-0.094543212	-0.215058863	-0.313890488	-0.400395651	-0.49749576	-0.592314985	-0.684880908	-0.747498041	-0.82181508	-0.876196531	-0.943700605	-1.012878593	-1.018042436	-1.045075806	-1.07422834	-1.079256184	-1.088200835	-1.058325881
0.101603781	0.205045599	0.306900109	0.391555781	0.462053472	0.549982907	0.635154409	0.698233412	0.780295572	0.826337149	0.893068377	0.921668317	0.969208724	0.984483169	1.004574749	0.99204637	1.007449331	0.980286654	0.952944498	0.934764596	0.89675335	0.814250259	0.773977718	0.694708152	0.654289325	0.568480128	0.456243382	0.373263003	0.301924076	0.202150032	0.105103236	0.010966153	-0.0955376	-0.182054239	-0.284668239	-0.382375597	-0.47160075	-0.559101533	-0.64151028	-0.717378104	-0.78363607	-0.840958914	-0.874764951	-0.921610065	-0.956630417	-0.978568695	-0.993218267	-1.001161632	-0.992767188	-0.983877472
0.100606488	0.202979027	0.28465672	0.37484138	0.48082186	0.553620148	0.632096599	0.706905349	0.760055364	0.826157385	0.879525426	0.920626363	0.946883442	0.984503718	1.000794648	1.010246767	0.995296473	0.985260788	0.951978435	0.930727044	0.885220134	0.823159052	0.76526012	0.708202687	1.060110472	0.551711122	0.465303078	0.375077938	0.299890429	0.201619013	0.117095467	-0.008482273	-0.095021107	-0.19175215	-0.28873715	-0.380626036	-0.4733899	-0.544996312	-0.621507648	-0.704695976	-0.774754013	-0.831559127	-0.888710698	-0.916631471	-0.952991345	-0.979744326	-0.985870283	-1.009861164	-0.990642403	-0.980846622
0.1004535	0.207866457	0.283984865	0.38318103	0.478986864	0.532944276	0.640366154	0.712997765	0.778499229	0.844903687	0.915933056	0.95590401	0.976762173	1.010213009	1.03289381	1.040318384	1.025283382	1.018665947	0.998793548	0.960350631	0.93179846	0.866471246	0.794639939	0.72660757	0.657226773	0.581071883	0.493744046	0.404699355	0.307366046	0.217926238	0.08400659	0.004889644	-0.102014935	-0.20223107	-0.301975628	-0.39927507	-0.500612014	-0.598032762	-0.671547669	-0.750875698	-0.826847823	-0.878564775	-0.946032842	-0.992582818	-1.031476439	-1.06760552	-1.076230307	-1.079985258	-1.071419212	-1.076800826
0.032887842	0.092603995	0.191239226	0.300821813	0.384368932	0.450108245	0.464646865	0.485281383	0.481563326	0.513077715	0.581962705	0.665733862	0.752923119	0.854565963	0.91969432	0.942195043	0.918468967	0.858742275	0.754893546	0.649684251	0.566690365	0.499719039	0.477800723	0.474769862	0.478342701	0.422626393	0.386559367	0.303151479	0.201305713	0.100844673	0.019749717	-0.003413698	-0.014684497	-0.091767802	-0.203165314	-0.293238193	-0.392691685	-0.431567048	-0.474453108	-0.480167982	-0.479886783	-0.503686171	-0.561218837	-0.649471078	-0.747385946	-0.850047687	-0.908627485	-0.941318835	-0.923357952	-0.855460961
0.106251619	0.198807339	0.285143377	0.383122818	0.468853737	0.549714012	0.626609926	0.710645324	0.771335684	0.836773355	0.888464027	0.912584138	0.954482662	0.976551498	1.002840233	0.997396394	0.999300658	0.961507779	0.955643714	0.908074621	0.883357518	0.820722499	0.778315048	0.704691324	0.634051079	0.544646082	0.481168932	0.387876428	0.296157972	0.213589428	0.099405455	0.009980302	-0.105514942	-0.185378892	-0.294477337	-0.378043763	-0.472333044	-0.55462371	-0.637698512	-0.713180046	-0.779422106	-0.826851548	-0.88509302	-0.929426727	-0.956259931	-0.984092351	-0.988941046	-1.003328954	-0.990047344	-0.980184211
0.102946569	0.188438384	0.289850544	0.377268528	0.468730913	0.553357251	0.634831243	0.703869324	0.779054636	0.831192167	0.88797475	0.930373311	0.95384959	0.977993743	0.993878909	1.004672893	0.999325906	0.991907492	0.956086467	0.916145268	0.872849087	0.82686794	0.777050419	0.703279336	0.629640322	0.567191238	0.475200094	0.385571025	0.29216369	0.200508401	0.090709233	-0.010305845	-0.091035216	-0.197014751	-0.288910913	-0.382014799	-0.473903501	-0.54721916	-0.629918267	-0.70526419	-0.768511219	-0.83040046	-0.883163776	-0.932614442	-0.954583142	-0.979849743	-0.989771403	-0.996322375	-0.995804161	-0.979047563
0.116137096	0.188066066	0.290571704	0.378287321	0.461121661	0.554738248	0.63649628	0.706845624	0.782211236	0.830546846	0.886116453	0.926731501	0.969862392	0.984665492	0.991765057	0.998327837	1.006230349	0.981344042	0.954677521	0.924593346	0.888485093	0.838521891	0.777411303	0.699222619	0.263570633	0.563630238	0.471180759	0.38595946	0.294495268	0.203534426	0.097088807	0.013395406	-0.111726961	-0.190137162	-0.282616715	-0.365868628	-0.471685548	-0.57189046	-0.643785453	-0.712054286	-0.774356032	-0.832355024	-0.890928826	-0.921327715	-0.957336689	-0.980342942	-0.999012272	-0.991804909	-0.994098139	-0.982392834
0.096645986	0.188456651	0.302158878	0.374687636	0.466881756	0.555898533	0.632555216	0.711292427	0.768635842	0.827590499	0.888868637	0.924183603	0.9648704	0.982351173	0.999696015	0.99843417	0.994307985	0.97408612	0.947625349	0.917012772	0.889505451	0.818352133	0.760604265	0.71570821	0.393378572	0.556021594	0.466020587	0.38046211	0.295450692	0.203571754	0.099235204	-0.007961902	-0.10578668	-0.188120359	-0.292897492	-0.379016729	-0.462654064	-0.56011519	-0.618799353	-0.707730524	-0.76713134	-0.831146701	-0.878070439	-0.92298072	-0.947001901	-0.981071223	-0.990152958	-0.997520944	-0.999180302	-0.979664728
0.103787427	0.19239776	0.289224831	0.395216624	0.477259295	0.553546648	0.639479301	0.725098168	0.781788726	0.853291932	0.899707692	0.940087035	0.980282917	1.009510814	1.021885738	1.028579487	1.029010705	1.019264863	0.995344544	0.953774602	0.917086226	0.871272191	0.807721677	0.739552749	0.664262942	0.583578724	0.495916802	0.411495447	0.306212838	0.204531623	0.105018071	0.010421695	-0.105964682	-0.200948949	-0.300920483	-0.409033951	-0.500233131	-0.586536593	-0.685020345	-0.744672665	-0.833863215	-0.891584535	-0.944030886	-0.993617882	-1.043958511	-1.06023621	-1.074144477	-1.076894095	-1.070450218	-1.062219996
0.099695829	0.195780928	0.279919802	0.400863203	0.475010592	0.577646834	0.641763622	0.72823163	0.789255393	0.858835761	0.904293008	0.943955006	0.988330352	1.01545526	1.022040984	1.032168135	1.029113581	1.020556905	0.98998669	0.955811039	0.9253559	0.87038085	0.805009317	0.735234501	0.659377167	0.581013227	0.49782606	0.402334155	0.296672427	0.208873579	0.106877856	0.01526602	-0.108541052	-0.199961699	-0.318407001	-0.401181679	-0.504982703	-0.601708391	-0.678204554	-0.753735791	-0.820881495	-0.892832876	-0.936907448	-0.994819378	-1.02216076	-1.073336342	-1.070357368	-1.079701576	-1.075036862	-1.081536623
0.087272031	0.206658994	0.287142453	0.381205461	0.475296832	0.549757869	0.635349752	0.715190357	0.765380208	0.840142998	0.876774322	0.913283683	0.952310203	0.98609996	0.995829475	1.007068196	1.000457543	0.973894353	0.963946326	0.928555955	0.886169851	0.829357101	0.783676751	0.679195002	0.619920823	0.554761179	0.473199107	0.361039208	0.291506275	0.195233486	0.081322929	-0.003257249	-0.101778556	-0.186418782	-0.282703394	-0.38820004	-0.456585381	-0.53533836	-0.631313812	-0.693217704	-0.765134888	-0.836912445	-0.87251829	-0.931331774	-0.961891481	-0.979810674	-0.991940698	-0.990097111	-0.998291394	-0.983664201
0.092217688	0.194532552	0.294651333	0.379492518	0.465527521	0.554856796	0.632059305	0.695770518	0.770923872	0.834948036	0.892243539	0.922187651	0.957914038	0.968268282	0.995653706	0.999198093	0.993830208	0.980235277	0.944387995	0.931943337	0.876248482	0.841549743	0.7690521	0.708845096	0.967037092	0.554113814	0.477046211	0.380276021	0.294483621	0.190285021	0.104490015	-0.004868617	-0.10088704	-0.186437967	-0.284949636	-0.37961341	-0.472354421	-0.560313809	-0.637283636	-0.707164071	-0.762732688	-0.827367606	-0.887821446	-0.919258008	-0.958431899	-0.982093779	-1.000497168	-1.003207802	-0.997323248	-0.992755226
0.091530168	0.199098119	0.292696053	0.378738059	0.484539776	0.564734461	0.634254018	0.720789495	0.782930916	0.848523777	0.884000923	0.950431583	0.975107583	1.006866702	1.015480039	1.028660176	1.031551345	1.016804386	0.991687153	0.960773535	0.912972112	0.870480225	0.800019814	0.73697853	0.665404913	0.582535139	0.494356136	0.408458357	0.294738827	0.214266119	0.109895819	0.000283086	-0.099931145	-0.21314847	-0.315986757	-0.412740205	-0.504394264	-0.599005619	-0.692402012	-0.756033829	-0.820649224	-0.894395062	-0.950779633	-1.011231021	-1.03946671	-1.059807979	-1.082160807	-1.080686355	-1.096851554	-1.075598444
0.104419254	0.198843342	0.29141924	0.38185954	0.473046306	0.546712918	0.633013754	0.707533234	0.769235447	0.832326893	0.870151593	0.923244455	0.957104002	0.977205768	0.990387171	1.002372953	0.993196892	0.982932255	0.956477881	0.92239389	0.880476487	0.83384297	0.764273236	0.716281514	0.638688617	0.548407328	0.460442492	0.383324114	0.293186409	0.192474626	0.101508093	-0.000356977	-0.087198571	-0.190735423	-0.294498215	-0.378232781	-0.457833493	-0.553881215	-0.645057125	-0.707887281	-0.770486563	-0.828839317	-0.879092224	-0.92668724	-0.962537064	-0.979296656	-1.000542901	-0.99950452	-0.993759622	-0.975826156
0.016375279	0.086460244	0.17500759	0.279866041	0.350827346	0.419444282	0.46469174	0.485021103	0.513408548	0.539828803	0.605748752	0.683317965	0.786584802	0.873500008	0.943031533	0.963522944	0.933749976	0.869001415	0.786553593	0.690378295	0.601179663	0.546418898	0.511027568	0.472785416	0.460920189	0.42476842	0.363904981	0.272654838	0.176760154	0.07938472	0.029114275	-0.00056157	-0.023038767	-0.086508696	-0.178395834	-0.273013304	-0.354896626	-0.413358149	-0.456596189	-0.483054005	-0.518507422	-0.540187833	-0.595532557	-0.6839299	-0.777919011	-0.880701824	-0.946411215	-0.964542482	-0.938715718	-0.879881604
0.053529573	0.196049554	0.374727407	0.519203464	0.581297922	0.532553207	0.375157869	0.150036468	0.081549114	0.238598975	0.291361317	0.230460634	0.083887256	0.102505346	0.234602238	0.288345918	0.240612911	0.101670413	0.080799333	0.233361863	0.294886915	0.236730681	0.081551414	0.143820579	0.370894682	0.530158732	0.589807012	0.526617181	0.374163278	0.192968339	0.055964171	-0.001458207	-0.056044162	-0.191153326	-0.371299247	-0.522002394	-0.582113765	-0.534555198	-0.378207059	-0.150195126	-0.076525961	-0.238609175	-0.291281745	-0.230772387	-0.082979351	-0.093639506	-0.230780325	-0.292363912	-0.240399846	-0.10167046
0.089015589	0.198689045	0.27798936	0.378959265	0.475705653	0.561644145	0.635430231	0.715549835	0.783678359	0.829704327	0.885660247	0.921761778	0.948946469	0.994076898	0.993263072	0.988299792	1.000990773	0.989930386	0.952535504	0.921166425	0.878635781	0.827276266	0.773052354	0.710536072	0.443442522	0.562415198	0.479447282	0.380941531	0.299866599	0.197084756	0.095809983	-0.008334055	-0.089751253	-0.193553147	-0.291515776	-0.381432099	-0.47198187	-0.56460117	-0.625241824	-0.700659956	-0.765863901	-0.834897298	-0.887714512	-0.912063309	-0.951907865	-0.978995	-1.004294751	-1.0057885	-0.984807689	-0.964507063
0.070073406	0.266303444	0.495564821	0.684956467	0.758912378	0.693341142	0.522016913	0.467169627	0.656563061	0.898694421	1.02481929	1.042069395	0.98280168	0.925206718	0.910037077	0.923652808	0.913061041	0.928489072	0.976038431	1.042770244	1.038436272	0.898739748	0.65786793	0.455237565	0.511167954	0.687461973	0.768253114	0.689806715	0.511612164	0.264934101	0.077551926	0.00108964	-0.065621685	-0.258774027	-0.490750804	-0.690070703	-0.768444126	-0.695300033	-0.517587705	-0.454890886	-0.662527906	-0.898908223	-1.022225533	-1.040973006	-0.98498454	-0.922818196	-0.921128219	-0.917299565	-0.915039601	-0.927619555
0.023257233	0.089033478	0.151778983	0.238767743	0.338744183	0.391652319	0.45659394	0.498068319	0.524126252	0.569977299	0.641723896	0.727382659	0.822723366	0.894261457	0.962242436	0.988820811	0.954761609	0.909014926	0.828141536	0.743293779	0.64264433	0.586347913	0.526596549	0.474377664	0.45548499	0.3945417	0.319271559	0.23649773	0.151531782	0.08071807	0.027969118	0.003861312	-0.014725661	-0.077962082	-0.153550915	-0.239994139	-0.314419238	-0.411716399	-0.448610274	-0.485454229	-0.529578304	-0.582616968	-0.647935435	-0.730247105	-0.819194049	-0.90199415	-0.94602948	-0.990367455	-0.94795759	-0.899604835
0.098388297	0.196399096	0.292016848	0.386118485	0.471841075	0.560700336	0.627300645	0.713609007	0.78507892	0.83695512	0.883750062	0.921305638	0.958591455	0.980314681	0.995110024	1.001229647	0.997093307	0.983495117	0.951415308	0.922523148	0.887714016	0.832526133	0.770490446	0.729170437	0.486375356	0.559121454	0.469495939	0.382388323	0.283165457	0.195417452	0.094944131	-0.002299356	-0.093073031	-0.18475822	-0.294436702	-0.379769949	-0.471416264	-0.55082979	-0.631256606	-0.71024837	-0.769722474	-0.829054842	-0.890271921	-0.930966964	-0.962388668	-0.982325883	-0.988899048	-0.988790259	-0.995208013	-0.981266897
0.086389417	0.193498479	0.281000977	0.385999862	0.46014871	0.545504182	0.634437261	0.71234853	0.767626466	0.823949196	0.884871769	0.928975188	0.950992542	0.976412014	0.993419882	0.995845857	0.99310907	0.967492017	0.953358111	0.922040088	0.878356368	0.829937649	0.764556575	0.705909384	1.04864174	0.56773176	0.482244814	0.404127879	0.288364188	0.190512556	0.10644572	0.001866129	-0.088379673	-0.191005003	-0.281493661	-0.385576459	-0.472027235	-0.555648957	-0.645195011	-0.696226679	-0.756358237	-0.837583144	-0.886667322	-0.92142075	-0.949128159	-0.979104478	-0.989090915	-0.998361647	-0.982229056	-0.981012933
0.094946471	0.196090476	0.291828766	0.383244846	0.468656376	0.552571334	0.641051361	0.70867423	0.776382816	0.838362429	0.882007498	0.927295627	0.957514599	0.978353525	0.989502973	1.002707966	1.002426933	0.969966303	0.958081342	0.929116765	0.885017293	0.83304847	0.773687221	0.703039273	0.641069654	0.563360374	0.469857058	0.377514717	0.298221409	0.190807488	0.101968831	0.002050656	-0.098100182	-0.187738208	-0.287237837	-0.381836525	-0.473317483	-0.553456046	-0.632907373	-0.699654083	-0.768302524	-0.83172861	-0.889597263	-0.918666616	-0.952523858	-0.975957937	-0.988502929	-1.002551373	-0.991866145	-0.981730199
0.097107195	0.185440939	0.291712863	0.392729745	0.465978417	0.564990181	0.639134876	0.714153426	0.785609659	0.851493075	0.901215336	0.950244002	0.991378552	0.99950988	1.026221958	1.04664053	1.028621785	1.010827642	0.983139101	0.95856504	0.90051971	0.871493537	0.803244235	0.745953563	0.660112573	0.586898023	0.507774503	0.396717678	0.305062967	0.212748269	0.095316161	-0.010638074	-0.088670817	-0.186844926	-0.297293482	-0.411957148	-0.48955299	-0.604309384	-0.67663782	-0.754619445	-0.816206958	-0.888735467	-0.942293463	-0.99908172	-1.034342661	-1.045300779	-1.07509645	-1.081619035	-1.069955953	-1.074323354
0.229642505	0.431166492	0.584580868	0.693052285	0.73991397	0.745973939	0.718286247	0.681324287	0.665330558	0.684974325	0.71944793	0.779767705	0.853356639	0.925774855	0.982503466	0.996683203	0.967565722	0.942536499	0.867494643	0.779009635	0.734111609	0.691590354	0.687229282	0.720515798	0.729661792	0.752064563	0.758240667	0.699839819	0.591943038	0.43898543	0.238351855	1.17E-05	-0.215169781	-0.416288336	-0.565994906	-0.675776885	-0.705623383	-0.695591899	-0.691250545	-0.657617543	-0.643437823	-0.636749333	-0.659567028	-0.71346507	-0.765019358	-0.84975334	-0.8659268	-0.89524018	-0.882596855	-0.836849764
0.035110059	0.133022632	0.255605496	0.383249269	0.476133254	0.503431185	0.481109169	0.428959732	0.374898846	0.357614685	0.384318231	0.474714893	0.597815678	0.725398058	0.822749207	0.859118594	0.82712123	0.723807566	0.588305602	0.480368542	0.392933605	0.356620828	0.372730082	0.41748004	0.476114851	0.497965704	0.464818309	0.384745351	0.260566569	0.136499705	0.04074273	0.005368118	-0.029653608	-0.128081971	-0.259907319	-0.379560706	-0.46066177	-0.499238385	-0.478463878	-0.422684923	-0.377957355	-0.35762689	-0.371212806	-0.465595968	-0.597054385	-0.725593108	-0.822893198	-0.856944393	-0.825566564	-0.728906599
0.107546512	0.19022968	0.280253388	0.390986673	0.49105129	0.54343595	0.630083048	0.709762658	0.805809952	0.825025082	0.887354693	0.926533125	0.961944548	0.9767014	0.979777318	1.015881295	0.98848021	0.969330614	0.959917929	0.932154129	0.883528817	0.841564368	0.784348481	0.710843724	0.644284594	0.558588217	0.482448557	0.390671028	0.304903007	0.201401635	0.091085043	-0.018327625	-0.085868417	-0.205307849	-0.293566381	-0.399091176	-0.467040667	-0.545691552	-0.63421114	-0.69537869	-0.770341122	-0.845601072	-0.887737461	-0.918786276	-0.974351107	-0.977347817	-1.015861447	-0.99438714	-0.995349948	-0.966185988
0.100581607	0.1961982	0.294049673	0.385834649	0.474816618	0.556449534	0.637358329	0.712021631	0.761985646	0.82711903	0.882072296	0.919348033	0.958250366	0.980057985	0.996970651	1.003585728	0.991851607	0.987514303	0.956992945	0.914805636	0.884275869	0.835731298	0.768469881	0.710152469	0.63482668	0.558817115	0.474979204	0.383491369	0.293016933	0.198873579	0.095433292	-0.004060589	-0.10101745	-0.184344813	-0.288090364	-0.391064363	-0.473338633	-0.550305951	-0.630027351	-0.705160051	-0.77230627	-0.823878396	-0.88430031	-0.920622923	-0.954384468	-0.982177459	-0.992296206	-1.013410823	-0.997536473	-0.97840175
0.098707852	0.198228926	0.28682016	0.384263276	0.47393822	0.557686318	0.639233041	0.707709687	0.76795732	0.824252784	0.88121721	0.923659353	0.953425572	0.985527595	0.987947393	0.996509944	1.002705496	0.979559955	0.962484727	0.925956515	0.887273533	0.835637573	0.773449218	0.713153466	0.626072082	0.56112193	0.468007851	0.383772666	0.3009566	0.19406347	0.101686533	0.006739463	-0.085092011	-0.201888472	-0.289745727	-0.379082732	-0.475650031	-0.546170465	-0.63614379	-0.69987686	-0.766819175	-0.836004549	-0.878768589	-0.92163476	-0.950756744	-0.984991235	-0.990536128	-0.998367667	-1.002985356	-0.981735868
0.203195134	0.398940162	0.54239709	0.656091107	0.697070485	0.712205013	0.716646978	0.710938937	0.698179382	0.710175354	0.740786041	0.797104882	0.87244664	0.939970605	0.995886583	1.014228642	0.996594737	0.953204225	0.896916454	0.824837607	0.75794669	0.710289031	0.701606625	0.723613729	0.728545828	0.735495673	0.70959197	0.655585624	0.552847191	0.391320041	0.211614005	0.005283684	-0.194565825	-0.393396797	-0.533011927	-0.629996042	-0.672314314	-0.701708107	-0.683860352	-0.661850523	-0.656009261	-0.649647519	-0.682075681	-0.732812058	-0.791556676	-0.853169947	-0.893656518	-0.901041868	-0.894958431	-0.861020362
0.091703334	0.191792009	0.297512493	0.390046097	0.470273313	0.550130453	0.63595081	0.713368062	0.774088535	0.830837761	0.876222319	0.920612393	0.95498332	0.977773739	0.99058115	1.000308919	1.004600813	0.976724771	0.959553612	0.93173441	0.883523661	0.836992002	0.776065853	0.709261674	0.636595306	0.553269419	0.469620349	0.381436617	0.287528302	0.19206466	0.101562466	-0.000964658	-0.100115495	-0.199340304	-0.303611251	-0.387277691	-0.46451057	-0.548237842	-0.635922294	-0.706950764	-0.760526264	-0.831991064	-0.879233996	-0.92514033	-0.962301625	-0.981553641	-1.010255498	-1.001043964	-0.989746898	-0.989757261
0.10287823	0.191854384	0.298701699	0.378562074	0.479738334	0.554947529	0.646217235	0.717163086	0.777620495	0.83540987	0.883680607	0.920941924	0.956434564	0.991155945	1.001374914	1.012500184	1.002775487	0.990219328	0.958185271	0.925126949	0.892082811	0.84022998	0.787592976	0.711237255	0.624808867	0.556631313	0.467480223	0.389933251	0.291798141	0.198463129	0.104348906	0.005173763	-0.095063066	-0.189739939	-0.293138566	-0.375577876	-0.473363431	-0.55520849	-0.628404975	-0.698629786	-0.765017525	-0.821988182	-0.872980769	-0.913422706	-0.947924766	-0.983608679	-0.977909097	-0.996424817	-0.997183316	-0.973121894
0.09676823	0.195425767	0.282737593	0.388014878	0.470738534	0.561523976	0.641720381	0.722354121	0.778520883	0.844917675	0.904015147	0.945771024	0.980639977	1.009399294	1.028714226	1.031200108	1.029161357	1.021970133	1.001457459	0.957437553	0.923112959	0.863866736	0.80467985	0.742904637	0.670519286	0.586647518	0.497327449	0.413111523	0.308982242	0.216148268	0.107563227	0.003958539	-0.103202682	-0.199639156	-0.303450456	-0.412695152	-0.501988805	-0.598684521	-0.676554042	-0.760066406	-0.830888124	-0.890871671	-0.946662333	-0.996551593	-1.026361816	-1.063792421	-1.071962949	-1.077379204	-1.0729788	-1.056055117
0.030616373	0.126828867	0.250893776	0.372855057	0.456898037	0.494038118	0.476036665	0.433228196	0.401380642	0.381170742	0.417930303	0.496894988	0.619080217	0.745424558	0.839186848	0.876592487	0.841875613	0.750443273	0.624515848	0.49738327	0.409150876	0.376751259	0.392712097	0.437517426	0.477475308	0.489214159	0.456585445	0.37121133	0.252824821	0.132048488	0.037698187	0.007594955	-0.028269823	-0.128926393	-0.249564176	-0.365278946	-0.457035767	-0.499837948	-0.47668737	-0.436240688	-0.393412216	-0.37298505	-0.419973276	-0.499286977	-0.614885722	-0.744935591	-0.839372733	-0.873220914	-0.842233548	-0.743854114
0.223506671	0.427638154	0.574263303	0.684528016	0.732719578	0.730144994	0.720042178	0.69884357	0.686540271	0.69776582	0.724256643	0.78813943	0.863216928	0.931670772	0.991386514	0.996211462	0.996828241	0.95025086	0.862849337	0.805308058	0.74349513	0.709815758	0.697379583	0.714607887	0.732059145	0.748189279	0.751348851	0.684949676	0.579167015	0.432442575	0.2226213	0.006257174	-0.211384164	-0.399390665	-0.565754239	-0.666275086	-0.700172438	-0.71744039	-0.67773868	-0.655371646	-0.62989851	-0.639887417	-0.646309841	-0.730885611	-0.775175106	-0.833845085	-0.881087474	-0.896583192	-0.879367268	-0.831423601
0.10426529	0.18034938	0.290586632	0.391926334	0.483344463	0.550451146	0.647349019	0.714020831	0.776994196	0.838111188	0.886363534	0.922729712	0.960007242	0.993678988	1.010263316	0.998903604	1.00624106	0.98754917	0.951306972	0.942742366	0.881377208	0.84053818	0.761081142	0.702966888	0.652017495	0.560797842	0.480262155	0.382343141	0.281914439	0.199413565	0.099749518	0.004975995	-0.087634188	-0.184128087	-0.278512103	-0.358851201	-0.466696607	-0.530408947	-0.618567178	-0.713102696	-0.788873587	-0.828099005	-0.886443177	-0.905529454	-0.949059193	-0.980332674	-0.9764901	-1.001484898	-0.988279161	-0.993614716
0.039267464	0.137377155	0.268023025	0.398195307	0.497026972	0.511090532	0.474004282	0.417665151	0.34923635	0.3005424	0.335739817	0.427835305	0.551433439	0.67688248	0.804578886	0.823090774	0.792650177	0.684089027	0.561677412	0.425801731	0.331291824	0.305357783	0.338479105	0.408821447	0.484799927	0.513578224	0.492269312	0.405132645	0.27805931	0.136910542	0.04217766	-0.002194959	-0.040929097	-0.139276011	-0.271120888	-0.40688075	-0.48541067	-0.506846778	-0.488071421	-0.413181816	-0.342345368	-0.311289318	-0.330954319	-0.416276045	-0.554686949	-0.684724185	-0.7905717	-0.824214382	-0.79595681	-0.692213289
0.10329113	0.189531332	0.287861398	0.378606535	0.466678003	0.559519555	0.626366372	0.698389947	0.768504877	0.82719014	0.87720674	0.924828876	0.943422611	0.979991775	0.99481113	1.000631058	0.986292724	0.976051293	0.964748147	0.917833393	0.890981003	0.842270047	0.772182872	0.707425798	0.638443418	0.550958436	0.468067014	0.389119249	0.289330825	0.197671992	0.098037717	0.008560469	-0.10043947	-0.18875864	-0.288077377	-0.369505492	-0.473878877	-0.557195599	-0.630088279	-0.714992862	-0.764740923	-0.825365341	-0.878242062	-0.912554116	-0.946103744	-0.983979618	-0.994574187	-1.007381192	-1.001701479	-0.972451701
0.039175462	0.131017973	0.261996621	0.383623514	0.471117057	0.494413971	0.486160707	0.429758212	0.366990517	0.341604109	0.384213999	0.467389186	0.586656457	0.720282332	0.819152868	0.857543762	0.817625834	0.725052005	0.592781481	0.471401407	0.376769146	0.346244715	0.369328217	0.43087814	0.478711596	0.496159373	0.472161733	0.382770992	0.265206278	0.131154818	0.037616448	-0.001024854	-0.037498555	-0.135209257	-0.250190523	-0.382720839	-0.475496609	-0.500229753	-0.476784041	-0.429931281	-0.370505678	-0.352470343	-0.376858033	-0.467071679	-0.590453782	-0.717358856	-0.817331858	-0.855504714	-0.820954643	-0.717896741
0.094516619	0.198416075	0.290076628	0.394201116	0.471821497	0.540910417	0.63828299	0.710404386	0.782515876	0.840825574	0.8814432	0.914307073	0.965548007	0.98729713	0.992404681	0.997222059	0.996236071	0.985579346	0.961384162	0.920629683	0.888282584	0.821886045	0.790816604	0.710824495	0.983950561	0.585813866	0.475899637	0.390851316	0.2904259	0.192477242	0.103932924	0.001694378	-0.091321639	-0.202123761	-0.286578099	-0.390540877	-0.479123205	-0.552153671	-0.633322985	-0.721420396	-0.770819938	-0.824720881	-0.89066983	-0.922722993	-0.9612987	-0.982314673	-1.001360169	-1.007225727	-0.983973721	-0.974705673
0.046328096	0.177348358	0.347936473	0.489046524	0.567099214	0.555803389	0.448929041	0.296968499	0.139505522	0.034306646	0.017790574	0.095962903	0.241837303	0.407048217	0.535226253	0.578550553	0.541706909	0.411784412	0.24946615	0.097077061	0.016047704	0.028314497	0.132209897	0.29206868	0.448480454	0.548733302	0.573168012	0.493078086	0.349316713	0.183474753	0.048259132	0.005348655	-0.045813399	-0.171350701	-0.344456987	-0.488527804	-0.576356933	-0.551012651	-0.450102594	-0.298894585	-0.136218086	-0.036910527	-0.015152683	-0.094989536	-0.24205255	-0.394254427	-0.545321447	-0.588167826	-0.534993534	-0.413212478
0.094212351	0.201226885	0.297109802	0.386040773	0.469370442	0.563010981	0.639733705	0.700049666	0.766159078	0.831694804	0.885094525	0.923607042	0.951709374	0.985280296	0.997633271	1.003067019	0.991963148	0.992198006	0.957350783	0.934389923	0.876475424	0.818251904	0.766915455	0.714044606	0.669350381	0.546542283	0.473076481	0.381039618	0.279709548	0.215388653	0.09089729	0.006574932	-0.101425124	-0.197058396	-0.296763239	-0.386588075	-0.475303493	-0.563454601	-0.640674088	-0.720438867	-0.782296662	-0.824492529	-0.886894097	-0.934245926	-0.951836631	-0.989892327	-0.994591362	-1.001534187	-0.996309806	-0.978811375
0.096351878	0.187596193	0.294319153	0.376245946	0.480409013	0.562225813	0.640525512	0.718273592	0.779648415	0.837651845	0.886322862	0.946048057	0.973913153	1.000638082	1.025351224	1.037708806	1.025099054	1.021054263	1.002875918	0.949875608	0.919219054	0.870737773	0.801249558	0.744039038	0.670603185	0.585206724	0.503937798	0.407629856	0.30451088	0.206719677	0.09777305	-0.001900439	-0.107102106	-0.1946629	-0.300963497	-0.40164086	-0.493014098	-0.588563849	-0.679595303	-0.746877478	-0.833571636	-0.894787764	-0.935842477	-0.982583097	-1.035699585	-1.055286447	-1.065302495	-1.089933789	-1.076122315	-1.06312533
0.050977808	0.192091928	0.369595222	0.520002199	0.579636516	0.510609153	0.335623652	0.089813561	0.152566763	0.325575495	0.398455116	0.332302427	0.182818261	0.011366931	0.126137029	0.180343748	0.131418606	0.00628786	0.186948568	0.324899941	0.393521998	0.326834818	0.150113191	0.085678385	0.334057424	0.511991762	0.576675906	0.523781781	0.375995026	0.195524531	0.052580966	-0.004685882	-0.053997413	-0.18995913	-0.375896373	-0.518088498	-0.578449795	-0.513793444	-0.334372004	-0.099743565	-0.146952922	-0.320789469	-0.392121219	-0.338951155	-0.193500496	-0.017065657	-0.135885945	-0.193446486	-0.135455123	-0.011621405
0.102423844	0.199438707	0.293706265	0.376118753	0.472857101	0.549357013	0.653074512	0.71448914	0.782878604	0.848901462	0.891884342	0.945807391	0.987601379	1.003950252	1.019984848	1.035302923	1.034663283	1.017034372	0.993561349	0.961554715	0.925431809	0.869578679	0.810187866	0.740421597	0.658696449	0.576557663	0.495241913	0.409783501	0.306004363	0.188720659	0.118237159	0.004860856	-0.103842032	-0.197562591	-0.306638785	-0.402630008	-0.508776319	-0.598170034	-0.667041507	-0.757027498	-0.821626066	-0.886767204	-0.953236873	-1.009765052	-1.035148267	-1.058583105	-1.077489618	-1.087794754	-1.06536691	-1.064850513
0.096789806	0.185971071	0.294640974	0.381108695	0.479050955	0.575100924	0.639950098	0.71755232	0.785246655	0.845682485	0.903206319	0.939439869	0.984613604	1.010579505	1.013271705	1.020293734	1.027044959	1.010931171	0.989410901	0.961161864	0.927650037	0.868509325	0.811014926	0.728083508	0.66765838	0.596515575	0.48133425	0.39800563	0.307856019	0.20152269	0.099753133	0.004939936	-0.108367046	-0.210561669	-0.310585403	-0.409809142	-0.503562012	-0.59888744	-0.679787652	-0.751784152	-0.827078792	-0.90789847	-0.958836846	-1.004507512	-1.042673467	-1.07025426	-1.079433167	-1.087415441	-1.088864582	-1.088256477
0.087558342	0.190259348	0.288950314	0.378900835	0.47972407	0.556442084	0.624561544	0.699893473	0.775461645	0.831016612	0.870099142	0.92576158	0.957322903	0.982639418	0.990522859	0.995594707	0.983180182	0.98908992	0.964673497	0.915079339	0.892175975	0.839878167	0.763222523	0.694145809	0.632468548	0.551784143	0.473322917	0.386075176	0.306023865	0.197246471	0.107111633	0.014774014	-0.106178158	-0.20319342	-0.291884058	-0.377434788	-0.471357447	-0.559313425	-0.635936013	-0.694335074	-0.770732146	-0.827655969	-0.88458707	-0.914769394	-0.950553799	-0.973468037	-0.993917104	-1.011737221	-1.000700958	-0.977377026
0.104844366	0.188972831	0.285768331	0.38901527	0.462954166	0.561904526	0.643911942	0.716387012	0.775542064	0.828896381	0.873055439	0.939983482	0.949773396	0.977835269	0.987081754	1.006110689	0.987027988	0.97774624	0.975088665	0.919834373	0.900203282	0.840177514	0.774415908	0.707503538	0.629937484	0.554904349	0.460255972	0.378056413	0.286555042	0.199313282	0.105935862	0.000619868	-0.099001525	-0.203693736	-0.292840662	-0.382829551	-0.479675046	-0.547953048	-0.624951262	-0.696511461	-0.779611005	-0.828020056	-0.879608047	-0.917525957	-0.957674035	-0.988276307	-0.987579958	-1.003691033	-1.003245267	-0.969999869
0.086150526	0.17238006	0.292152999	0.377289672	0.484845415	0.563857092	0.642166234	0.718414103	0.763549863	0.834503947	0.887659661	0.914266786	0.954001592	0.982772977	0.981169177	1.004001782	0.980808921	0.973992492	0.957705211	0.915795987	0.887935517	0.829686883	0.770772093	0.701290047	0.63547166	0.562838767	0.460197295	0.382154383	0.274136761	0.191936414	0.10945104	0.003938844	-0.117148452	-0.183642775	-0.295159184	-0.373684797	-0.476308174	-0.558478587	-0.640085943	-0.703297767	-0.784938601	-0.840211038	-0.869784495	-0.923760489	-0.957214346	-0.974001127	-1.009269901	-0.997583066	-0.998842667	-0.984213434
0.11457626	0.19666	0.302149575	0.386123415	0.465603775	0.544209545	0.629071364	0.69872457	0.774412307	0.831087681	0.886751938	0.931259403	0.957729406	0.977454184	0.993246658	0.998761946	0.99003302	0.965650807	0.951732712	0.911793316	0.885455334	0.834666936	0.772143901	0.713327361	0.984622748	0.559015132	0.474258325	0.388870084	0.293012558	0.20084494	0.101373557	-0.000212301	-0.093266803	-0.196770357	-0.284059738	-0.37380272	-0.472198103	-0.566226135	-0.641861466	-0.697231147	-0.77947717	-0.825730583	-0.881251085	-0.923612323	-0.963523199	-0.970846835	-1.003843629	-1.00820022	-0.991986355	-0.984394791
0.030980017	0.131021446	0.2509467	0.384545474	0.471360461	0.496655551	0.470342351	0.43299417	0.36671602	0.361451346	0.393870485	0.483932024	0.602052243	0.727263738	0.824822616	0.861314978	0.835362143	0.731371559	0.602828593	0.483155296	0.396037172	0.361451667	0.3739873	0.426740745	0.48283158	0.508668118	0.480721301	0.374978672	0.265454151	0.12763625	0.027817025	-0.002527244	-0.026890132	-0.132092921	-0.25664299	-0.375545133	-0.466035449	-0.506654779	-0.467939489	-0.424826401	-0.374992171	-0.360847361	-0.388382765	-0.472829601	-0.603807607	-0.722285609	-0.829380965	-0.855118931	-0.832559131	-0.731980669
0.103953347	0.202227173	0.298901996	0.392030877	0.479056763	0.557080535	0.646083065	0.709049113	0.788816039	0.852851152	0.901520359	0.946009234	0.975344941	1.003575002	1.02532115	1.035122862	1.035332848	1.009983667	0.98424876	0.956862147	0.921267371	0.871900779	0.810034734	0.74379984	0.658068675	0.587859252	0.495325173	0.413080159	0.30290856	0.217432857	0.104987481	0.00280454	-0.097372769	-0.202172513	-0.312963424	-0.405742042	-0.504164093	-0.590433343	-0.679035656	-0.760284491	-0.835377336	-0.894356013	-0.935237736	-0.996356666	-1.023964409	-1.049789319	-1.079311332	-1.077094112	-1.066288765	-1.060075258
0.106605187	0.19496697	0.286733844	0.38950287	0.467430146	0.546415264	0.633246456	0.694976002	0.768541199	0.829588492	0.876176153	0.926673174	0.945579282	0.994402199	0.99273621	0.996460691	1.000356143	0.982907953	0.967601052	0.928866306	0.882026156	0.823938704	0.772343583	0.699914478	0.328045863	0.552868338	0.472531695	0.389863273	0.294784558	0.191572089	0.102945065	-0.003319661	-0.10631525	-0.196870159	-0.302099059	-0.379876069	-0.453013198	-0.549370806	-0.636679751	-0.712728174	-0.770126082	-0.836908292	-0.864359708	-0.931584754	-0.949971682	-0.969112743	-0.995419093	-0.999587907	-0.993605596	-0.978517531
0.094948715	0.200062014	0.297935401	0.384387001	0.47856093	0.554787109	0.643723109	0.708262738	0.773605812	0.849623269	0.896549277	0.934046199	0.972735779	0.982034523	1.006836823	1.012059957	1.019200092	1.005075791	0.974147998	0.943478856	0.903395349	0.851522649	0.795394419	0.736604449	0.648212889	0.573418593	0.487700782	0.399859794	0.291551834	0.203315008	0.100539274	0.005071529	-0.100035366	-0.213002393	-0.291834375	-0.383722653	-0.486476773	-0.584261896	-0.668508348	-0.740073763	-0.815951415	-0.876447635	-0.93221071	-0.980992119	-1.016853103	-1.044173135	-1.054432686	-1.055049834	-1.050032024	-1.035460495
0.083155497	0.178557672	0.264142542	0.560537871	0.487297372	0.443194773	0.625219373	0.738321255	0.80488154	0.784906643	0.837553278	0.851635889	0.989318954	1.017856392	0.937080028	0.841893119	0.997470763	1.107859698	0.931062586	0.908110192	0.885877601	0.848109542	0.872491056	0.708982121	0.597372611	0.561082755	0.545323703	0.346360506	0.359667337	0.076742119	0.192472132	-0.039680286	-0.04060648	-0.164550878	-0.207258264	-0.36283109	-0.442937901	-0.465153304	-0.607051729	-0.72325716	-0.748793552	-0.791448109	-0.819413858	-0.920410431	-0.97517859	-1.054924422	-0.867575172	-1.092761775	-0.946897081	-1.050294199
0.08786503	0.210789841	0.279216306	0.38493089	0.478933385	0.57614178	0.637827893	0.715498572	0.781512704	0.852146785	0.906096687	0.944284524	0.986326407	1.005034745	1.033210377	1.029500137	1.038204198	1.01019726	0.98411957	0.969172851	0.908382015	0.873692032	0.79843494	0.733282069	0.67344687	0.594843623	0.507008526	0.390499079	0.303121225	0.210168365	0.102893192	0.003338571	-0.10158335	-0.206573528	-0.307242668	-0.39445618	-0.495409543	-0.600752442	-0.672039771	-0.726532894	-0.833468476	-0.880229212	-0.953588575	-0.994050701	-1.019471471	-1.051969246	-1.07332413	-1.076978982	-1.083222553	-1.066663246
0.104062244	0.202963071	0.295860886	0.3909914	0.476484008	0.553985431	0.643035587	0.708244118	0.790694561	0.84905619	0.899846371	0.941299217	0.985733065	1.00915837	1.012607144	1.037336826	1.02646119	1.013029173	0.995120992	0.955638807	0.919208014	0.855770376	0.802433607	0.748002065	0.663860655	0.576495752	0.489788909	0.406963147	0.309318428	0.197733985	0.087698163	-0.006288819	-0.096734124	-0.202243191	-0.299471843	-0.404780146	-0.502746477	-0.586154883	-0.677574021	-0.761805066	-0.824685107	-0.890821545	-0.941828594	-0.992673893	-1.039276269	-1.065438392	-1.05663827	-1.08091404	-1.079722209	-1.073338749
0.041880601	0.139964328	0.275775179	0.399040651	0.487075647	0.515110864	0.490312638	0.417026047	0.349745677	0.305167885	0.336047287	0.419605131	0.544829921	0.69012375	0.793717801	0.82353522	0.788562453	0.691132878	0.554046583	0.423548314	0.33349853	0.315860284	0.342894813	0.411632162	0.480270387	0.513776986	0.489260067	0.403420065	0.281244668	0.142135407	0.037198749	-0.000135222	-0.034476035	-0.132767796	-0.273770915	-0.403694208	-0.485560281	-0.510632666	-0.485429699	-0.412131971	-0.348054367	-0.307541469	-0.33422911	-0.428482762	-0.549624279	-0.686830928	-0.78058085	-0.822748002	-0.786105857	-0.690550927
0.08135929	0.194529025	0.290616559	0.384898252	0.48483872	0.562390305	0.632199108	0.719179875	0.784505875	0.844019782	0.895494742	0.933130374	0.962252839	0.994743513	1.028486027	1.034157658	1.022520053	1.023108637	0.989309011	0.950945394	0.911892213	0.855527066	0.79469212	0.746678262	0.666286738	0.581433956	0.486649792	0.400454282	0.292764594	0.207136578	0.092971171	0.019252432	-0.097653122	-0.198765274	-0.313499563	-0.40500994	-0.515445625	-0.583820089	-0.699567261	-0.785031976	-0.816927235	-0.884299133	-0.963369329	-1.000778894	-1.043226167	-1.066492787	-1.077723775	-1.065142603	-1.0892152	-1.062031081
0.100432766	0.198318609	0.28767507	0.386311624	0.466734226	0.567284495	0.636997177	0.705601504	0.75720518	0.825652332	0.881165118	0.921511058	0.950515091	0.9796351	0.98624134	1.001540188	1.004103928	0.979811268	0.943919368	0.92486081	0.888685987	0.839914025	0.784067709	0.714467958	0.486258733	0.558442422	0.476927265	0.384165759	0.286844617	0.191204714	0.105493879	0.00653773	-0.101106299	-0.195818172	-0.293984169	-0.362879328	-0.45529945	-0.545529928	-0.614722753	-0.71566664	-0.770558195	-0.825003736	-0.879170145	-0.932629603	-0.961357462	-0.981317452	-0.981997817	-0.999944985	-0.992745719	-0.976005833
0.098644254	0.182416876	0.286481727	0.381025388	0.467484967	0.560239356	0.636837458	0.709351317	0.764672069	0.830036404	0.878791425	0.923545071	0.955750272	0.973673946	0.998468897	0.989545225	1.001670292	0.976658643	0.957826594	0.919824824	0.882733487	0.83086819	0.773042506	0.704149775	0.636833726	0.556609901	0.476773941	0.385539828	0.277367938	0.196501074	0.102694302	-0.005230213	-0.084350749	-0.188848616	-0.281635299	-0.378745646	-0.469515616	-0.54113992	-0.633169562	-0.709478907	-0.770204226	-0.837826571	-0.883614815	-0.924201732	-0.952222225	-0.974705383	-0.99340081	-0.99660064	-0.993923905	-0.983026208
0.179164343	0.330575812	0.466884235	0.558495294	0.638667306	0.662274819	0.691137647	0.707709753	0.729757789	0.750338681	0.797862825	0.856137927	0.902808306	0.963880651	0.999010034	1.014607019	1.001195253	0.976322058	0.935553333	0.863673044	0.809555838	0.756378253	0.732678308	0.722707621	0.709334821	0.689100858	0.657901089	0.572792724	0.480707101	0.347976951	0.184043303	-0.004802935	-0.162969004	-0.331088051	-0.456364645	-0.550304348	-0.608317855	-0.644054775	-0.663947803	-0.655347	-0.673137443	-0.692703561	-0.718883978	-0.77467194	-0.821574695	-0.872787052	-0.91230896	-0.902759822	-0.899771469	-0.867124123
0.1042405	0.200601762	0.298090779	0.379022045	0.476410595	0.557967072	0.63482496	0.706835815	0.770857138	0.828105161	0.879985017	0.921755299	0.951386643	0.977364247	0.997661628	0.996743424	0.986740903	0.980885391	0.960832102	0.923444488	0.889739167	0.828551767	0.769626025	0.698662276	0.629890907	0.559948423	0.473725787	0.387260273	0.298705615	0.198019963	0.09946498	0.000931932	-0.092400594	-0.198057954	-0.289942202	-0.384261542	-0.473544696	-0.555272024	-0.625357012	-0.707774755	-0.778420371	-0.834621798	-0.88866756	-0.922243647	-0.950231761	-0.984655031	-0.99427655	-0.993870181	-0.999183763	-0.984119866
0.095516207	0.205756181	0.287740183	0.392974391	0.469682261	0.553662638	0.633654059	0.709486651	0.761723469	0.83287763	0.872134315	0.923873603	0.960433284	0.976112156	1.005399541	1.000702431	0.990361832	0.978792395	0.962145863	0.920029916	0.88189911	0.842556143	0.779434182	0.699385497	0.637323527	0.551070496	0.480188308	0.377147172	0.2776869	0.200020441	0.090603773	-0.006821243	-0.099075987	-0.191208009	-0.29066454	-0.388517348	-0.466721928	-0.548922294	-0.641699762	-0.700119107	-0.771171272	-0.830881048	-0.882968533	-0.935115172	-0.959196637	-0.975994408	-0.998692004	-0.995338791	-0.997378196	-0.979898089
0.095918931	0.190825864	0.297412133	0.385312191	0.468577289	0.561184936	0.639927467	0.726134565	0.78016314	0.822966025	0.894761016	0.956722023	0.977903547	1.004406945	1.015816262	1.034502529	1.025050849	1.023437239	0.996695029	0.952388386	0.918674858	0.877188795	0.795510666	0.725384066	0.655815566	0.581352098	0.506927642	0.423408403	0.300415933	0.204907671	0.087535354	0.005467305	-0.092911465	-0.199139557	-0.307695067	-0.398946606	-0.494883824	-0.602000826	-0.676439719	-0.751145087	-0.829756298	-0.893990122	-0.945276264	-0.996773987	-1.0265121	-1.049899966	-1.065176399	-1.075355153	-1.086352321	-1.074582683
0.107476708	0.195740244	0.285427455	0.397007371	0.475643577	0.562458607	0.650554181	0.70643921	0.788855067	0.853272845	0.903851076	0.933711744	0.971308299	1.022512391	1.020476441	1.039871976	1.029180277	1.026401057	0.992839693	0.940785764	0.9283289	0.860233211	0.815536278	0.744386537	0.679025165	0.586894914	0.491529571	0.399452058	0.314761095	0.206616783	0.110945071	0.003071413	-0.116148472	-0.196540479	-0.307678134	-0.402574264	-0.514749441	-0.605856432	-0.676957997	-0.77264569	-0.853808459	-0.899743402	-0.954372269	-1.013819672	-1.056343848	-1.084848807	-1.109710106	-1.099684091	-1.099867545	-1.094442708
0.02437847	0.091165074	0.172171463	0.277841561	0.359015493	0.416073891	0.459259672	0.482012539	0.512243503	0.544302252	0.61734532	0.694551064	0.790211831	0.873874632	0.936168895	0.967827236	0.936685455	0.868864408	0.787583229	0.695694063	0.620459093	0.545094794	0.514985944	0.485057863	0.460794639	0.421039266	0.355455259	0.27541996	0.176100988	0.070131319	0.012428923	0.001458103	-0.018740416	-0.083517328	-0.180452663	-0.268602485	-0.367218198	-0.419948948	-0.456713525	-0.483401591	-0.513853892	-0.536688522	-0.603295888	-0.681972443	-0.787324301	-0.880482605	-0.944682059	-0.967567174	-0.944632844	-0.879940639
0.018608942	0.07005215	0.16579983	0.231849831	0.316870442	0.387676839	0.435690631	0.492595345	0.54324057	0.60174995	0.674146146	0.746873392	0.8320704	0.920933888	0.967086252	0.985405209	0.959490804	0.914374259	0.836245798	0.747541806	0.672151765	0.586681056	0.538737151	0.492614467	0.441181661	0.383806996	0.307998966	0.241057648	0.154816003	0.07662363	0.010455621	-0.00163291	-0.017892694	-0.072505923	-0.151053696	-0.231332654	-0.320124814	-0.392542993	-0.436595466	-0.486586526	-0.545178625	-0.601510882	-0.668548385	-0.743659553	-0.825803504	-0.907761663	-0.959059817	-0.982335401	-0.957039414	-0.901467086
0.098079182	0.199900193	0.288701983	0.385164404	0.4688178	0.55681698	0.634190292	0.698194814	0.766973574	0.83238938	0.88179531	0.922055529	0.962882349	0.974370684	0.990547133	0.999304653	0.996628247	0.976469587	0.951720602	0.919348261	0.881085513	0.837409349	0.774970541	0.707066689	0.633783395	0.553929254	0.47709318	0.388428741	0.288666768	0.197185216	0.108310288	0.002380147	-0.086334509	-0.196127367	-0.29564602	-0.388754773	-0.470196224	-0.56147495	-0.628374974	-0.709756745	-0.771116633	-0.836463125	-0.878333516	-0.918555743	-0.959955206	-0.980427958	-0.998025158	-1.000520919	-0.998511583	-0.980056953
0.107862987	0.198847938	0.299516415	0.38433374	0.474737042	0.55417361	0.627285461	0.711893919	0.772919652	0.838321295	0.88228304	0.919147053	0.943796858	0.974506043	1.007899133	1.013037095	0.999740335	0.974818873	0.957485916	0.930568936	0.876541012	0.828571384	0.77291327	0.725184333	0.838503567	0.559009107	0.46870401	0.381377588	0.29572879	0.186623433	0.093326297	-0.005540529	-0.097747227	-0.199298671	-0.282306008	-0.387325126	-0.472603519	-0.556333064	-0.638283235	-0.711133113	-0.762219173	-0.831989172	-0.871068366	-0.921830332	-0.960072869	-0.980405436	-0.996721692	-1.003383925	-0.999921331	-0.979679658
0.084821001	0.191536771	0.281447625	0.380718156	0.482300353	0.550721955	0.63805851	0.714087526	0.778993436	0.821816376	0.879532847	0.926369162	0.971539451	0.961752223	1.003949037	1.015052551	0.992075263	0.982667295	0.964050924	0.924967812	0.882768981	0.824209771	0.783170257	0.715975223	0.654472294	0.558037933	0.47952884	0.368403347	0.28789425	0.202658933	0.088346765	0.01992638	-0.084807097	-0.213034678	-0.286845531	-0.376388262	-0.483297186	-0.55947743	-0.621337281	-0.702590805	-0.767125386	-0.833648584	-0.881601019	-0.919998127	-0.958919172	-0.990991643	-0.982842724	-1.007505181	-0.99163975	-0.992513292
0.099570197	0.191599143	0.299070375	0.383853813	0.467374156	0.550216333	0.631059529	0.720186412	0.765899781	0.823126873	0.879409844	0.932147531	0.951052165	0.978754519	0.997333057	0.991755746	0.997274591	0.97455619	0.967155016	0.933019851	0.874542909	0.831390755	0.769134199	0.702982903	0.389091754	0.559841121	0.475982006	0.388860613	0.296419834	0.19578803	0.097483708	-0.001510042	-0.09769014	-0.191667576	-0.280216308	-0.365415089	-0.459675259	-0.560680534	-0.642938696	-0.704208519	-0.785498822	-0.825613698	-0.881623244	-0.919365305	-0.962047859	-0.987876147	-1.004603375	-1.003970644	-0.985174479	-0.978562981
-3.138487373	15.1667449	-6.601452195	13.96585491	-8.746912993	7.460564599	-3.077668991	-0.860591182	-2.736764024	-1.893562402	4.267439441	-4.431864246	-5.265473582	0.470118982	-6.681234887	2.67115138	-4.957351029	-13.13188506	-7.939645502	2.818715903	11.34840676	-4.360342422	-0.070908885	3.275945836	2.154957997	1.841090319	2.684896826	8.83523076	-2.212793364	-4.48322031	0.806883913	3.753385145	-4.141780279	-0.621416685	-0.265705418	2.149022803	-1.827379822	6.174934075	-7.141124899	-2.390068271	9.56221208	8.668238268	5.75519591	-0.918046523	-3.31022126	5.113509893	-9.395657826	-0.871084716	-0.947280443	-10.17160016
0.040567736	0.141496843	0.270558463	0.396885011	0.488941894	0.507167922	0.486565262	0.413155012	0.355728118	0.312723152	0.340402953	0.430101032	0.560702666	0.697220842	0.800315707	0.825625464	0.797158499	0.691700815	0.563833707	0.42940546	0.343344913	0.326989903	0.347008299	0.42054916	0.476848053	0.517872227	0.486816186	0.391657254	0.272537734	0.141857344	0.040887313	0.000344233	-0.027480292	-0.141399383	-0.265566436	-0.397535819	-0.483681597	-0.517192648	-0.488906242	-0.419017712	-0.35622777	-0.321816777	-0.342896729	-0.432845863	-0.563842542	-0.681699059	-0.789687535	-0.825445209	-0.799567316	-0.694830778
2.526295346	1.308785238	-2.258455473	2.674449615	3.639528205	-4.254982663	-4.93690398	-0.776705392	2.547365153	-5.37986008	-2.026654148	1.033925907	-1.492901657	-1.674060818	4.496829341	-2.248577514	-3.984603771	-1.041372258	3.932212578	-0.543243607	3.482269821	0.362906825	2.248988228	1.914270982	-1.040135208	0.099483769	0.621763587	1.681423674	3.059160603	1.282749932	-1.328770601	-5.876415083	-2.647473515	-1.588923655	-4.707077036	-0.285502694	1.63715987	-0.937044158	2.446337733	-0.247980626	1.556642421	0.891699011	0.876407127	-1.879352768	1.734304339	0.136839026	-1.739724882	1.715515289	-1.004478042	0.849931174
0.081595926	0.202559914	0.289976915	0.376314847	0.469620613	0.55452028	0.633804679	0.699010276	0.771149284	0.821479953	0.885511368	0.938191298	0.952052211	0.978415362	1.004624635	1.000145728	1.012903588	0.987453279	0.956012411	0.91387822	0.890070417	0.828527881	0.780639739	0.710768414	1.019681123	0.55118459	0.479437284	0.368974159	0.287380731	0.190932562	0.098157809	-0.003084384	-0.087634704	-0.193354963	-0.293566346	-0.366942274	-0.467092831	-0.547544859	-0.629955713	-0.701230233	-0.765590004	-0.826556206	-0.873634865	-0.911248996	-0.951755817	-0.983393535	-1.003488068	-0.989573082	-1.006242963	-0.983246025
0.098176472	0.19784293	0.289319474	0.380177084	0.475622114	0.541816674	0.627375485	0.703148464	0.772123515	0.825986733	0.879214336	0.913795517	0.958427852	0.99460407	0.983422841	1.006858275	0.989022566	0.988212105	0.955784475	0.932127202	0.881199952	0.835186744	0.768835726	0.711128993	0.282394052	0.563905408	0.47789562	0.379876739	0.296292646	0.189947385	0.097514527	-0.00899441	-0.103210156	-0.207974796	-0.286788145	-0.386116179	-0.480710326	-0.557029387	-0.644570178	-0.705335644	-0.767501609	-0.843213319	-0.887288612	-0.924379521	-0.941645781	-0.981030106	-0.996738709	-0.99734156	-0.997612619	-0.985812841
0.069630643	0.261073851	0.501808243	0.676779756	0.74941718	0.680171757	0.518945716	0.444154505	0.648650617	0.875979157	1.009726911	1.010252968	0.956421906	0.899518921	0.89346551	0.901021893	0.88075671	0.893045311	0.947285591	1.025478319	1.005173707	0.877761562	0.64065888	0.450572272	0.504662536	0.681026553	0.760774932	0.681668871	0.496778493	0.262105438	0.076854505	0.010238018	-0.069810041	-0.251240454	-0.483134835	-0.685401133	-0.758306601	-0.677273433	-0.503225512	-0.442639515	-0.63330035	-0.867424951	-1.004194911	-1.015320333	-0.957923604	-0.89540197	-0.885790764	-0.892551899	-0.887038906	-0.890237282
0.266740368	0.480282218	0.588138311	0.647809547	0.626487366	0.580327469	0.575603205	0.603801558	0.687733877	0.791116271	0.857029504	0.911136093	0.925362595	0.905784583	0.876960946	0.851303258	0.862795869	0.898900036	0.93484087	0.921131631	0.870745622	0.780914871	0.679437536	0.605914695	0.574008277	0.578885502	0.610134755	0.641523167	0.603185505	0.47328842	0.274108637	-0.004266445	-0.261505646	-0.471439901	-0.589144339	-0.637388254	-0.633157913	-0.589181931	-0.562730183	-0.604871987	-0.697910133	-0.773708582	-0.864232661	-0.931382316	-0.93420566	-0.893752058	-0.866923049	-0.864378288	-0.883328129	-0.904354776
0.076388531	0.26434191	0.494978512	0.685120652	0.746880149	0.673759714	0.502712061	0.443266258	0.636629612	0.858690404	0.995507679	1.006644688	0.93801339	0.886315652	0.878445555	0.877346955	0.882713151	0.889617307	0.93419226	1.013698843	0.995872165	0.869007208	0.641505752	0.438453002	0.494140538	0.673646445	0.742733651	0.674989355	0.489561571	0.263251441	0.069442375	-0.000274934	-0.070880216	-0.249117155	-0.475927926	-0.668957938	-0.752324103	-0.676998701	-0.507382369	-0.441591583	-0.634872548	-0.862443135	-1.000401849	-1.002482073	-0.940187303	-0.895786526	-0.883762277	-0.883251815	-0.886911374	-0.890369639
0.087252682	0.200280179	0.280278545	0.392202108	0.470850005	0.573910237	0.625476257	0.721156987	0.788734632	0.847091804	0.894224866	0.936778409	0.980599603	1.000059185	1.02161859	1.027766712	1.04200902	1.030202595	0.994036198	0.965714149	0.93468376	0.865016434	0.804235845	0.732210613	0.660145749	0.583831681	0.51156734	0.400826606	0.304157349	0.216187313	0.095031947	0.004751266	-0.105371868	-0.211988237	-0.305782823	-0.405854808	-0.481403319	-0.577640906	-0.674038438	-0.754495431	-0.82009579	-0.900586773	-0.950966188	-0.992329841	-1.012879002	-1.055392311	-1.082495289	-1.072803092	-1.070893831	-1.058445517
0.102379958	0.201849878	0.305092895	0.379052614	0.466054326	0.556849797	0.642749617	0.702916227	0.778421992	0.830203302	0.871274047	0.920913016	0.969452471	0.978686934	0.991600246	0.990997366	0.991093889	0.987210767	0.955814779	0.931445908	0.882729572	0.830863404	0.774164693	0.697556972	0.837671411	0.556294265	0.475261745	0.372091163	0.283167299	0.198871349	0.108191939	0.008695331	-0.099521975	-0.190012483	-0.294881046	-0.3650658	-0.456904405	-0.555133399	-0.647258489	-0.701354985	-0.768097581	-0.834275904	-0.87482739	-0.931955679	-0.970874071	-0.980266841	-0.988474857	-1.005987806	-0.9954635	-0.987168571
0.094304635	0.189524711	0.303824153	0.384073485	0.475413992	0.554645175	0.626915111	0.696790932	0.769820111	0.819102794	0.893459213	0.934472579	0.967771816	0.979145425	1.001443664	0.988774026	0.989752312	0.990078669	0.9569044	0.929574382	0.87806718	0.828077872	0.773225261	0.70729128	0.633912025	0.555308559	0.471124057	0.381980634	0.287111982	0.211202491	0.099029574	-0.004207468	-0.090157906	-0.184132562	-0.276669149	-0.37907577	-0.472905893	-0.558728365	-0.642338335	-0.716667344	-0.780564296	-0.826398102	-0.886350261	-0.918414495	-0.959351574	-0.988929319	-1.00186313	-1.000829165	-1.009351881	-0.980416797
0.091852667	0.204867954	0.315233276	0.374664051	0.477909589	0.543722931	0.650335978	0.703438578	0.790745708	0.845715378	0.918203547	0.945529573	0.976105891	1.006661295	1.030141192	1.022250071	1.036647257	1.027822813	0.987479677	0.975056843	0.911324407	0.877547116	0.790524532	0.737714111	0.669830173	0.591417001	0.513199518	0.385685644	0.314504315	0.200263377	0.112883701	0.017669685	-0.111040933	-0.203805008	-0.318419729	-0.391893975	-0.486118108	-0.592330826	-0.669743895	-0.760739243	-0.813420712	-0.889895578	-0.944807784	-0.988053131	-1.031396739	-1.049662146	-1.077524184	-1.094215917	-1.102475225	-1.069116586
0.093270307	0.200960946	0.283748752	0.388478617	0.465240771	0.547349593	0.63162122	0.701573431	0.770241128	0.833927984	0.876310271	0.920159985	0.953258028	0.983416455	0.999564596	1.018411613	0.998989229	0.980404051	0.951255428	0.934183231	0.879367846	0.843503481	0.775134032	0.70074774	0.637429489	0.552526709	0.47420704	0.397341981	0.300331452	0.204326865	0.109916048	-0.002984383	-0.088861798	-0.193789169	-0.280189399	-0.376060709	-0.468145939	-0.556121918	-0.636760407	-0.698581267	-0.769226301	-0.82957999	-0.877334036	-0.927441989	-0.962457567	-0.969185286	-0.996774767	-0.992714585	-0.991593454	-0.980606524
0.100217129	0.186558312	0.291527513	0.388031349	0.464780664	0.554100134	0.638660507	0.701402717	0.780069837	0.835945107	0.884879148	0.924761404	0.955962997	0.986687761	0.994458694	0.998602069	1.007552369	0.984807075	0.967647314	0.930566249	0.883532585	0.826088507	0.780108537	0.712440539	0.635224767	0.564630587	0.478901872	0.386329682	0.295139631	0.196600988	0.09432605	-0.000158494	-0.09280862	-0.193551028	-0.302878205	-0.382996988	-0.474779722	-0.554026011	-0.62674334	-0.719323539	-0.762442435	-0.834833526	-0.878808444	-0.918080988	-0.958343187	-0.983018983	-0.995474884	-0.992747101	-0.990177648	-0.97727187
0.105747366	0.187023285	0.293477666	0.38014105	0.473886575	0.559999414	0.631491297	0.712738154	0.777692619	0.828145388	0.881987813	0.924899913	0.95862785	0.990078886	0.980890433	0.994615911	1.00565999	0.974940766	0.959202205	0.927820417	0.883762951	0.831811086	0.763920469	0.708236827	0.642476542	0.557018644	0.474423027	0.365004955	0.287363543	0.195314396	0.097415389	0.003667826	-0.081477404	-0.189684467	-0.296207774	-0.37683095	-0.460327039	-0.563288957	-0.629033937	-0.695832401	-0.772016883	-0.818702575	-0.884522386	-0.928215217	-0.958852279	-0.983397571	-0.997958933	-1.006140782	-0.993629749	-0.972956381
0.065298529	0.257619813	0.501530152	0.696939387	0.76611462	0.689649639	0.515315791	0.465130438	0.650814454	0.892982049	1.03078395	1.044281474	0.960188502	0.925125436	0.912113721	0.928163681	0.916245579	0.921150406	0.973524277	1.030576221	1.024954678	0.892358097	0.649637168	0.467390699	0.510968874	0.686097491	0.757979315	0.693627788	0.496764686	0.267559049	0.074310805	0.004367887	-0.070243859	-0.254863584	-0.485260146	-0.686741432	-0.758809153	-0.683237117	-0.522652677	-0.45545793	-0.656630741	-0.880434043	-1.018306407	-1.030892401	-0.977473749	-0.92071328	-0.89830045	-0.923522117	-0.911465914	-0.917136251
0.052034814	0.198831984	0.368636403	0.524231159	0.576497421	0.516935615	0.353947161	0.11398848	0.113499911	0.284044157	0.342573816	0.283417942	0.138795448	0.039602253	0.178483909	0.233432181	0.179118751	0.037432376	0.136393327	0.287685513	0.346965043	0.289140541	0.121826942	0.109876179	0.34836167	0.517304116	0.580952105	0.522381397	0.375373046	0.204442162	0.057539814	-0.000373469	-0.049506893	-0.19086738	-0.371826515	-0.517710264	-0.577330131	-0.522097062	-0.35897522	-0.121960926	-0.114736173	-0.291315797	-0.342127478	-0.285143007	-0.143316062	-0.03206281	-0.180613206	-0.233162946	-0.182960172	-0.044930154
0.095724392	0.193702189	0.299499321	0.38499898	0.470825492	0.557891959	0.634640977	0.716185938	0.780917699	0.822671324	0.891733559	0.91978575	0.948190428	0.982872949	1.002149174	0.997863411	0.995659137	0.983076903	0.952327429	0.923781039	0.886903536	0.82491306	0.777752096	0.706649581	0.629333441	0.555172692	0.477947559	0.389643934	0.292503261	0.197038101	0.104206095	0.005164283	-0.101921786	-0.186816108	-0.29910473	-0.374425358	-0.462032538	-0.553424372	-0.634024089	-0.705941173	-0.769321578	-0.831381534	-0.876622717	-0.923405738	-0.972236084	-0.974262981	-0.995431073	-0.999938802	-0.99117409	-0.982971106
0.11110331	0.196498536	0.282461481	0.368527225	0.482539556	0.554176121	0.634884571	0.705800043	0.765979735	0.833912489	0.869095991	0.925515867	0.952931727	0.985287357	0.990281285	0.997729088	1.009000214	0.973257028	0.951311154	0.937134479	0.87397295	0.842283742	0.772345891	0.712210957	1.095171109	0.552478738	0.467350146	0.377848471	0.269984043	0.192891507	0.09466426	-0.015187146	-0.101044586	-0.185733713	-0.291619906	-0.377636287	-0.469746005	-0.556379647	-0.625902871	-0.713754468	-0.760649672	-0.832836154	-0.875595982	-0.917984828	-0.964293952	-0.981229963	-0.995238029	-0.994441469	-0.990045473	-0.985498437
0.074490871	0.256278925	0.483726554	0.684038732	0.746810096	0.666104109	0.496889476	0.435600864	0.625914901	0.869118495	0.994251022	1.001732576	0.936114595	0.877005602	0.867744737	0.88167086	0.864517607	0.883925002	0.93405076	0.999248188	1.005554739	0.866719142	0.643310499	0.437857183	0.495960208	0.660402771	0.741972146	0.681330805	0.485499371	0.256514763	0.080175179	-0.007719789	-0.06448094	-0.243231353	-0.483565224	-0.670687913	-0.74041939	-0.677157168	-0.505678884	-0.423922683	-0.629177296	-0.858767821	-0.998277612	-1.003503652	-0.936653143	-0.883196227	-0.875910083	-0.880867148	-0.871194925	-0.880406242
0.345384701	0.42131792	1.163915478	4.304380485	-0.339589552	-0.667064791	0.865799287	0.608452854	1.165450328	-4.00670778	-2.052419484	-4.240320172	1.26143063	4.775968652	-1.869980742	4.531482126	-2.597226553	-2.675740337	1.526753423	-0.615445627	-0.066729908	1.564313751	2.578956159	0.53371401	3.170645941	3.01333069	-0.797659624	-2.396023531	0.680854098	5.937404231	-0.265893721	-2.243345713	-1.810745113	2.444621482	2.567464392	-2.86141553	-3.77575307	-4.63045749	3.554040148	-3.396554393	-1.760110639	1.042312845	1.868634323	-2.197070934	-2.726446736	-5.554576818	3.279729271	-3.986192339	0.246787289	-1.822440508
0.257412365	0.485073133	0.599526656	0.64783677	0.622640777	0.579807625	0.56696636	0.623336254	0.697830079	0.786974422	0.874706616	0.926192066	0.933619972	0.920258491	0.874859191	0.845076009	0.867845182	0.909051864	0.916424769	0.923579736	0.88253711	0.779855473	0.68582656	0.608342499	0.569492002	0.587900922	0.612917909	0.656389843	0.604006924	0.487042754	0.27257509	0.00549729	-0.278121861	-0.478552042	-0.608192874	-0.641020615	-0.63226655	-0.578136576	-0.582659804	-0.586234379	-0.679009064	-0.783747357	-0.868512337	-0.922668567	-0.928208905	-0.908427734	-0.865352466	-0.84839228	-0.872527509	-0.899296913
0.099416687	0.190802765	0.28592417	0.395176228	0.479802291	0.554787466	0.657246286	0.709684753	0.775852474	0.848002451	0.898230894	0.94656999	0.994700712	1.018845151	1.019075478	1.030177335	1.023825851	1.015207624	0.998128546	0.960318939	0.924889541	0.861596741	0.800926513	0.741987616	0.673170548	0.588216329	0.499738898	0.417091707	0.297762111	0.194656498	0.104979636	0.007862534	-0.1164608	-0.210055463	-0.313827326	-0.40191073	-0.520767784	-0.588610741	-0.690100465	-0.773964782	-0.846631474	-0.894763003	-0.938372331	-0.986135371	-1.028578256	-1.051480148	-1.058304425	-1.077678066	-1.07733473	-1.063053949
0.222182563	0.409713842	0.535604984	0.586717415	0.59642013	0.594905362	0.572431697	0.625510556	0.707772929	0.791280738	0.87664772	0.937609398	0.945272688	0.926994499	0.89161876	0.889435733	0.894708824	0.920151689	0.922995539	0.930960085	0.872358481	0.794964204	0.713463228	0.640365411	0.588968574	0.582438141	0.594433778	0.594958464	0.542625775	0.41586399	0.24058596	0.012547581	-0.214680685	-0.420771076	-0.53864533	-0.583736225	-0.580296032	-0.579361822	-0.585756252	-0.628029873	-0.703304419	-0.799176955	-0.872398638	-0.930761055	-0.939388374	-0.916187698	-0.90931185	-0.891354057	-0.900071773	-0.933579883
1.580686061	-0.458157923	2.740461648	-0.287097394	0.258595414	-4.815732487	1.157317782	3.13490065	3.646218296	1.589598393	2.219795418	2.821419987	-0.144872092	-2.117263796	2.672614254	-2.658482455	1.038292329	2.645486915	-0.506922868	-2.385551128	0.687967466	1.807743119	1.277899296	-0.446389208	-0.303056512	0.104500221	0.541075461	2.923477701	1.24726632	-2.240910751	-1.345085192	-0.868876359	1.422212792	-0.965888425	-1.561112574	-1.003758229	-4.189197923	0.420761889	-1.017846099	-2.034904699	-4.641264629	-2.89176545	-3.541355913	0.364520377	-2.626769039	-2.186419617	-4.998603725	-0.331779437	-0.198010807	0.271183699
0.10021917	0.197655633	0.281087749	0.375718916	0.469909042	0.548543699	0.634660416	0.705842744	0.759910871	0.844738991	0.882858173	0.923341131	0.962178801	0.978431228	1.00480055	1.003155367	0.988722172	0.979322471	0.972114763	0.915156417	0.88804051	0.817570372	0.772337151	0.718197748	0.476767061	0.544951982	0.46868604	0.378965884	0.279132525	0.199768589	0.099443808	0.008130159	-0.097631655	-0.199538456	-0.286874044	-0.376676103	-0.475480452	-0.557875362	-0.640585699	-0.722944053	-0.767884604	-0.819664004	-0.881806626	-0.921295058	-0.962405082	-0.979065215	-0.990152699	-0.992442009	-0.998912395	-0.984993987
0.103093205	0.178981226	0.284565844	0.404829424	0.469681676	0.563378257	0.634277771	0.715852348	0.775068054	0.846933673	0.902245567	0.931098591	0.982495732	1.018501036	0.997888376	1.035843902	1.034857782	1.018794183	0.988954959	0.952874098	0.915620184	0.853407946	0.788787657	0.730402912	0.651249384	0.57720398	0.488212397	0.394070101	0.305966959	0.207708938	0.10602702	0.008742227	-0.098929695	-0.218107425	-0.308659382	-0.402923566	-0.503695192	-0.59005571	-0.67329264	-0.765569409	-0.843640819	-0.898237278	-0.929130517	-1.017876098	-1.043238724	-1.071574327	-1.061037225	-1.074078613	-1.074600363	-1.061606706
0.093308511	0.18018668	0.291205163	0.380277162	0.463116233	0.549708979	0.63798102	0.711341704	0.780711823	0.834228134	0.894929354	0.920320526	0.963518791	0.992263256	0.99101841	1.009025396	0.984591782	0.967061612	0.962907843	0.930300772	0.879611502	0.838481389	0.776770417	0.70279717	0.529040239	0.566399063	0.46300447	0.379310191	0.285862004	0.187783022	0.091824461	-0.003804571	-0.091223096	-0.186685324	-0.299170773	-0.379416605	-0.467455392	-0.550026955	-0.626899865	-0.700876234	-0.779608862	-0.827163048	-0.869861535	-0.921544822	-0.945560364	-0.972819379	-0.99126453	-0.999409084	-0.997503983	-0.985589554
0.013093051	0.072448714	0.159386096	0.250532707	0.33650489	0.396190648	0.458690782	0.485916261	0.532773819	0.577455818	0.637979499	0.728952392	0.819802778	0.9006507	0.952936728	0.969502552	0.959322108	0.897856275	0.813105846	0.731830005	0.640655013	0.579081894	0.521118014	0.488403651	0.456236833	0.404151108	0.332853076	0.254904677	0.170306157	0.080596995	0.02120389	-0.009751443	-0.021071872	-0.073666755	-0.15890392	-0.250325803	-0.327628689	-0.408950257	-0.444960708	-0.48504203	-0.525866753	-0.5731278	-0.644486378	-0.720173008	-0.813434328	-0.900988077	-0.954207416	-0.971753975	-0.954889744	-0.899836994
0.020601231	0.068696551	0.143450849	0.227829853	0.315909393	0.383271857	0.441592931	0.486771974	0.547519612	0.603490067	0.67668587	0.745982452	0.829644154	0.913098882	0.964208079	0.982779624	0.964475327	0.901613653	0.835466102	0.752903934	0.65858243	0.603351522	0.548973211	0.497904437	0.444193715	0.390640764	0.31839209	0.234826142	0.149244501	0.068020571	0.022185646	-0.003966903	-0.027051784	-0.073703383	-0.154816311	-0.239220572	-0.320135783	-0.387015678	-0.445588416	-0.492398506	-0.536116698	-0.602854256	-0.662727061	-0.759738532	-0.84057061	-0.914381581	-0.965557166	-0.992091845	-0.966940126	-0.908510305
0.072544803	0.260747624	0.492044814	0.697591848	0.762091654	0.686218027	0.50769619	0.459265376	0.657839476	0.894910615	1.028459328	1.030871681	0.975996949	0.918827963	0.899809674	0.916815433	0.908705592	0.920217808	0.962671328	1.033024954	1.02623185	0.896389182	0.65929304	0.451233659	0.5140959	0.67857161	0.758062163	0.695588572	0.504858893	0.261671424	0.067282863	-0.002189619	-0.067114666	-0.251202546	-0.498982539	-0.691101002	-0.759217569	-0.696211467	-0.517205346	-0.457968138	-0.654769762	-0.878749434	-1.027826125	-1.030513668	-0.967241746	-0.917708655	-0.911835969	-0.927141434	-0.90818113	-0.915223394
0.078823098	0.266180207	0.496344186	0.698335287	0.767384986	0.678213273	0.507083105	0.459405646	0.659214727	0.89069973	1.03091643	1.034253797	0.969163957	0.922364788	0.914609789	0.915298908	0.908442964	0.916206875	0.970070848	1.023670415	1.028231345	0.893348969	0.655042278	0.459695401	0.513380319	0.679867547	0.762631499	0.687364881	0.500168455	0.269853561	0.075860754	-0.007438933	-0.076745498	-0.259711031	-0.499623392	-0.68557321	-0.758034292	-0.692710592	-0.521368834	-0.464033369	-0.645583723	-0.886818251	-1.024071993	-1.037839146	-0.976311388	-0.915206717	-0.901644474	-0.92289598	-0.911965855	-0.906212628
0.109392361	0.198314315	0.28239484	0.410702946	0.474685788	0.560711284	0.623255909	0.687433654	0.774148817	0.829738918	0.875879313	0.917305181	0.969877758	0.981978645	1.003355759	1.001304952	0.989119812	0.999539748	0.953187214	0.914639845	0.90293011	0.83445754	0.783734988	0.696856274	0.645065877	0.552616888	0.46505465	0.383107983	0.297880341	0.205212923	0.09886408	-0.007056097	-0.101246506	-0.185815103	-0.279623098	-0.386156765	-0.485532515	-0.542624435	-0.633043086	-0.70212746	-0.774891523	-0.820457762	-0.894365762	-0.922681255	-0.960439389	-0.982981786	-0.981507327	-1.002271983	-0.990176332	-0.979283847
0.22076603	0.407772494	0.557419719	0.673836994	0.732201323	0.73624176	0.715178866	0.696004994	0.69044379	0.693465586	0.741562112	0.787542102	0.85764399	0.937837429	0.991476972	1.00229949	1.005323835	0.947079846	0.882097524	0.802379151	0.737086239	0.705745452	0.678920137	0.718921799	0.73095897	0.748968356	0.73818352	0.678798089	0.576909969	0.429292893	0.207157233	0.004818272	-0.217946998	-0.412318492	-0.54711176	-0.645166189	-0.691878982	-0.69120342	-0.689259257	-0.64645047	-0.632817912	-0.629519648	-0.674416741	-0.720845856	-0.777473501	-0.84392077	-0.888432796	-0.888330479	-0.879546894	-0.831846312
0.08677234	0.186828735	0.26825475	0.374551898	0.461351515	0.552647205	0.635675565	0.702556854	0.777882287	0.828819441	0.877527847	0.930038231	0.959967382	0.97655812	0.991532663	1.001304809	0.995185896	0.99057356	0.949675622	0.934749768	0.885651006	0.839011758	0.768664419	0.713730427	0.620546235	0.54856958	0.470254306	0.396632548	0.291405701	0.194263286	0.084494714	-0.002822876	-0.104889062	-0.185235378	-0.286720792	-0.373244671	-0.458682367	-0.552083593	-0.629463099	-0.70916853	-0.77356245	-0.836565605	-0.876596007	-0.9199478	-0.960576107	-0.987914752	-0.999076359	-0.998082984	-0.994599965	-0.991202932
0.170133731	0.339792728	0.470670446	0.579989501	0.64179098	0.67694806	0.694916529	0.705493401	0.722945387	0.764624602	0.792855508	0.863214879	0.90916475	0.964632625	1.012272539	1.017976421	1.017607739	0.969906542	0.926842349	0.86459539	0.815139841	0.765217999	0.749626885	0.728624749	0.715683574	0.680799753	0.645483104	0.584382348	0.477873579	0.336864868	0.177571836	0.019287767	-0.170003265	-0.313504249	-0.450655738	-0.548566641	-0.625084323	-0.638190042	-0.650052004	-0.671308621	-0.674634827	-0.686509247	-0.730347921	-0.772841765	-0.825540802	-0.858711395	-0.897299448	-0.910760448	-0.889268414	-0.878255136
0.113803033	0.186457124	0.288129274	0.382248036	0.467666736	0.575343479	0.637364676	0.728931072	0.777403143	0.846166162	0.910384447	0.962083899	0.977817981	1.00409462	1.020092559	1.036493019	1.025222331	1.033290804	0.994045005	0.933731467	0.934401487	0.874615736	0.783543962	0.754405216	0.67125533	0.59035321	0.506759966	0.396546261	0.302750918	0.203896682	0.117095263	0.001414603	-0.104801349	-0.236305386	-0.308052599	-0.409359123	-0.501383665	-0.608968299	-0.676497145	-0.747534114	-0.830789387	-0.902343864	-0.942364621	-1.000336928	-1.015735595	-1.071306518	-1.083343658	-1.073702053	-1.064909906	-1.060015017
0.091916223	0.188982569	0.290910769	0.378248387	0.476461246	0.563975176	0.638747283	0.712107058	0.783119754	0.83581482	0.868232346	0.937280519	0.962860638	0.987078443	0.989639997	0.984834872	0.985238912	0.990985053	0.955202128	0.933134237	0.893803428	0.834730314	0.772966968	0.701026741	0.636894618	0.563986653	0.490922112	0.394600236	0.294984105	0.210673165	0.094598174	0.003471011	-0.118590951	-0.186388709	-0.285217197	-0.381567881	-0.457958849	-0.54497525	-0.643051243	-0.71186151	-0.775804613	-0.828191573	-0.883705623	-0.921343859	-0.947201639	-0.984475454	-0.994756516	-1.00416764	-0.998358393	-0.965724255
0.196754166	0.339324863	0.466355304	0.524603737	0.572672982	0.5720846	0.609074326	0.648608198	0.726934463	0.802013271	0.869156997	0.939342622	0.946623304	0.956351738	0.938729344	0.930734067	0.933542783	0.948491684	0.954020375	0.918354649	0.886852789	0.82476175	0.738281245	0.665379951	0.601810225	0.576631794	0.553353299	0.524936259	0.45071439	0.345697029	0.20246846	0.010579083	-0.188301752	-0.349658428	-0.467131175	-0.519516516	-0.561706761	-0.575892089	-0.611186919	-0.652379912	-0.733278637	-0.810657888	-0.880777575	-0.923211601	-0.944118117	-0.94951453	-0.928382148	-0.932496192	-0.925717109	-0.940961638
0.086651908	0.193970138	0.295427472	0.382745885	0.461858006	0.555613655	0.615117275	0.692041535	0.773787118	0.831526019	0.878134908	0.926207073	0.960406909	0.988224407	1.000580569	0.99771734	0.996105671	0.972962007	0.953099352	0.929064949	0.87744819	0.827982271	0.767953759	0.697284031	0.632590801	0.545464349	0.479435093	0.381880689	0.296290999	0.1933487	0.11353536	-0.000742319	-0.089209146	-0.195945764	-0.29267729	-0.374650794	-0.467543638	-0.551475433	-0.634479092	-0.707655456	-0.770340598	-0.839408892	-0.882022973	-0.912763957	-0.953487273	-0.980448163	-1.001964079	-0.983672316	-0.982153383	-0.966807775
0.08566476	0.184718051	0.286040353	0.378788197	0.486337802	0.554022763	0.648211841	0.719256573	0.783539822	0.838421017	0.902953098	0.939991911	0.989912376	1.019126074	1.019100678	1.026838437	1.015237471	1.005667221	0.977483728	0.954966657	0.910810725	0.867348792	0.807391607	0.746836451	0.658548369	0.588346856	0.496109257	0.407549657	0.306187566	0.203563821	0.105508086	-0.003337944	-0.096932803	-0.205397239	-0.298864506	-0.399170795	-0.490729587	-0.579775459	-0.677318716	-0.757807617	-0.835013313	-0.879214595	-0.94704437	-1.003443858	-1.032084717	-1.058966729	-1.078486062	-1.08384466	-1.075301928	-1.054659894
0.109440429	0.216039137	0.28452036	0.383968695	0.455195914	0.543801541	0.645258508	0.720574852	0.777731227	0.843067301	0.903580015	0.950074566	0.976358816	1.011323025	1.032992184	1.034365981	1.021765735	1.025669214	1.00486736	0.966384903	0.932021684	0.87624651	0.806569441	0.74822821	0.652422962	0.579548121	0.4989466	0.409067123	0.324052422	0.212613197	0.09973745	-0.006322739	-0.105557621	-0.20660093	-0.31204124	-0.398541516	-0.499884286	-0.57745178	-0.674333176	-0.75377676	-0.819461387	-0.893358403	-0.947910134	-0.976731721	-1.026779733	-1.055392502	-1.073685633	-1.071181286	-1.083048261	-1.060958137
1.563725225	-0.043892205	-2.168304062	0.375993232	-0.697494544	-0.097208986	1.464655119	2.294641713	0.356975286	0.884667835	-1.037383594	2.337920791	-1.331791714	0.545678236	0.502238628	-0.444971501	0.196624863	0.765113535	0.07266578	5.610747795	-2.7361188	-1.4838445	-4.400376552	0.761473486	-2.261020647	-0.658664579	-1.645350051	0.990221486	-0.406212994	1.815731861	-1.506980317	1.505775025	-1.366222913	1.289711941	1.023453199	-0.47723115	-1.474096424	3.191714526	2.598624258	2.846640525	-1.087854319	1.888315302	-2.167031977	-3.192447629	-0.484151409	-0.760752677	-0.975646486	-1.39268318	0.416974552	-2.518853842
0.103961827	0.199269025	0.293717034	0.388485699	0.473726187	0.565644103	0.641865104	0.716780562	0.786637661	0.850284545	0.910334782	0.952669464	0.987904959	1.020827486	1.014941639	1.042696691	1.027633627	1.025940691	0.99092003	0.951920648	0.913619146	0.860481485	0.802846227	0.734119174	0.671231462	0.579886131	0.499840353	0.406076634	0.306052272	0.196876791	0.104133209	0.007892308	-0.094237742	-0.197849266	-0.308882124	-0.407992519	-0.500548074	-0.599614519	-0.670412806	-0.756150196	-0.826289764	-0.889489298	-0.935181453	-1.007804718	-1.023797106	-1.049286355	-1.08015112	-1.076492995	-1.0821483	-1.062982949
0.090834511	0.190070499	0.294032514	0.381584164	0.479637759	0.564780838	0.629616702	0.71064317	0.770837899	0.839753602	0.900798814	0.929550755	0.974138141	0.988060654	1.017091394	1.015772151	1.018101616	0.999333996	0.979503875	0.955610387	0.901555705	0.860060605	0.790283402	0.745659532	0.652006575	0.582178937	0.47900172	0.397035134	0.295411856	0.206417094	0.098905328	0.006586701	-0.093263967	-0.203001618	-0.288675703	-0.398121899	-0.491777473	-0.587022196	-0.664875753	-0.73997513	-0.829110966	-0.877284865	-0.937877737	-0.971716659	-1.018989941	-1.060417209	-1.059025025	-1.070190064	-1.063963144	-1.062443506
0.071642934	0.254694406	0.487373471	0.679830624	0.743596934	0.677685686	0.497729804	0.437761282	0.628768782	0.863729801	0.983981255	1.006528109	0.936917822	0.870228108	0.874697528	0.879000669	0.864267215	0.87376595	0.930402759	0.997600337	0.983064642	0.867740969	0.63048651	0.439209995	0.504062183	0.667062785	0.749794293	0.676743426	0.498093568	0.256887691	0.073308711	0.002842301	-0.064417583	-0.246579759	-0.485049599	-0.667982006	-0.749179801	-0.664369251	-0.502827322	-0.437429924	-0.62019565	-0.864045567	-0.986707278	-1.000349017	-0.940709502	-0.879935307	-0.864187141	-0.87751176	-0.870793716	-0.873303429
0.088337083	0.185764459	0.289332466	0.37511737	0.487904212	0.559921612	0.63367558	0.717434668	0.773355965	0.828426568	0.884766363	0.919300012	0.953977512	0.976390857	1.009576962	0.999452077	0.990307553	0.979388401	0.953576616	0.931805059	0.875573016	0.821301698	0.774973638	0.708698041	0.250606624	0.559263509	0.469854071	0.396207978	0.290882781	0.190993801	0.103586337	0.004350088	-0.099267783	-0.201582921	-0.285568976	-0.382123118	-0.472545499	-0.554248786	-0.63816839	-0.711624312	-0.775149149	-0.847343405	-0.867613724	-0.934616669	-0.954156269	-0.990065846	-0.997152682	-1.010092405	-0.9788211	-0.980799966
0.041154209	0.169898795	0.333179274	0.480013295	0.562604434	0.549834718	0.461410713	0.327280614	0.182368406	0.100914081	0.097274368	0.17704775	0.31618299	0.477636055	0.607304523	0.654333099	0.607490947	0.489645571	0.324679632	0.177468185	0.098419488	0.101354201	0.183244375	0.326624398	0.460614696	0.550747073	0.553251329	0.475034582	0.330816553	0.171249356	0.046853034	-0.007001454	-0.04794995	-0.169061484	-0.327880293	-0.471847774	-0.556573313	-0.555918637	-0.467125856	-0.33058483	-0.186383168	-0.106148268	-0.094379569	-0.180703192	-0.317261617	-0.476176719	-0.608190571	-0.654583582	-0.606976892	-0.483160293
0.112651408	0.192783129	0.29891919	0.370358922	0.462893208	0.561918283	0.632269388	0.708917257	0.771256381	0.835676477	0.888035175	0.907183868	0.968967038	0.979060675	0.993319564	0.989868287	0.995951436	0.979802712	0.954419563	0.9274034	0.884706835	0.839516798	0.761184964	0.72908206	0.368137752	0.56201107	0.483708996	0.382733208	0.293476771	0.200007495	0.103882253	0.003252846	-0.088291549	-0.193795919	-0.298246591	-0.375761211	-0.461606381	-0.549511663	-0.615500453	-0.718410071	-0.77146691	-0.82659615	-0.876659476	-0.913671914	-0.953403428	-0.973833594	-0.982445211	-0.983753544	-0.978739156	-0.974842842
0.092904599	0.181519259	0.290927121	0.395160049	0.485417634	0.553111916	0.641667174	0.734250278	0.788243292	0.835168222	0.885352812	0.951084119	0.98801941	1.000801197	1.010548039	1.040960957	1.02553147	1.020220381	0.987376064	0.943254957	0.912892634	0.87608758	0.808266791	0.740824895	0.68232511	0.588214372	0.502011412	0.410540246	0.297316018	0.200754926	0.11164156	-0.007158826	-0.112672175	-0.209546785	-0.307800277	-0.397675687	-0.495869389	-0.58810135	-0.654964279	-0.759474488	-0.826905463	-0.886773431	-0.946768775	-0.998202277	-1.028887584	-1.057563151	-1.06193217	-1.074695912	-1.08079296	-1.057601701
0.092522958	0.194066714	0.289694755	0.38389458	0.46461545	0.570643403	0.649377592	0.714346476	0.799018508	0.849939802	0.920324311	0.935540238	0.988740495	1.015559513	1.019359933	1.043171283	1.03231299	1.020877244	0.988241175	0.96076221	0.923332158	0.863218546	0.812903928	0.752493676	0.663588045	0.601884806	0.494841764	0.401095111	0.298855972	0.22130915	0.11105927	0.01011742	-0.095290025	-0.203702804	-0.305913977	-0.406166478	-0.506436099	-0.595314249	-0.674743614	-0.758237643	-0.832642811	-0.900399656	-0.963533321	-1.010375622	-1.04708578	-1.075340259	-1.079139857	-1.103523655	-1.092619156	-1.06937293
0.093646183	0.190255201	0.305787411	0.381816051	0.491077578	0.559531924	0.634306479	0.721907846	0.783775104	0.85608167	0.896802089	0.944678418	0.992816632	1.009046156	1.026912082	1.047430224	1.037557327	1.009307781	0.993991334	0.945089425	0.917885998	0.860543107	0.810672956	0.750775908	0.666189738	0.582552459	0.501121303	0.408660877	0.304564463	0.189736465	0.103273811	0.001405204	-0.097633737	-0.206138284	-0.307085659	-0.419167722	-0.50520873	-0.599267183	-0.685519053	-0.746510522	-0.817046266	-0.888607344	-0.953809823	-0.986621591	-1.023445433	-1.06810905	-1.078616989	-1.07544735	-1.070184691	-1.068671096
0.284606641	-0.848485963	0.319742788	0.425011997	0.011683786	2.076485578	2.469527631	1.749830364	0.497870656	0.833108398	1.896779891	0.522858398	0.972324954	0.101384798	0.524656123	0.905355221	0.657971402	0.298010058	0.725089467	1.833786118	1.099201698	0.499411268	0.271560982	1.634390128	0.669656141	1.0038488	2.812927696	0.252697662	0.21013893	-1.431807337	0.901058057	0.84608633	-0.153997034	-0.737114465	-0.232033859	-1.842147699	-0.91967227	-0.229747492	-1.626806206	-1.555004841	-1.443101307	-1.384591112	-2.804475144	-1.021280535	-0.244615874	-1.047909733	-1.342212767	-0.653374651	-1.271664711	-1.232359051
0.180389116	0.316868661	0.466751077	0.575170268	0.620843042	0.67660464	0.69562364	0.712246188	0.726415277	0.752902901	0.790626691	0.853537375	0.915220974	0.956947468	1.015613668	1.016497075	1.01585716	0.984762909	0.930325654	0.86946215	0.817371012	0.764385784	0.747823099	0.722001293	0.712928154	0.673389655	0.63468614	0.579183659	0.480978584	0.337255183	0.180572865	0.009925234	-0.170127085	-0.330939406	-0.450917733	-0.5601565	-0.609112439	-0.655071573	-0.662464179	-0.667294633	-0.673151617	-0.697318375	-0.735305862	-0.759069994	-0.822199542	-0.868650296	-0.88884048	-0.912539235	-0.893071966	-0.878594641
0.098140548	0.189657884	0.292383787	0.389465942	0.467541453	0.548768655	0.642762596	0.704635679	0.769132128	0.818870978	0.875925291	0.917751106	0.955481361	0.980131567	0.996495799	1.008618828	1.001747366	0.993555758	0.949026592	0.925404188	0.875562426	0.832834286	0.78011138	0.718010469	0.621661891	0.544274743	0.465474023	0.386695107	0.286512044	0.184439217	0.08222518	-0.010416387	-0.105450292	-0.187751805	-0.289056555	-0.377063877	-0.47326244	-0.549261754	-0.630269601	-0.705858425	-0.770635613	-0.832525925	-0.871605067	-0.915904056	-0.94615216	-0.988174759	-1.001215251	-0.99522897	-0.990519177	-0.976803126
0.065704631	0.231146434	0.443068932	0.620790548	0.685754961	0.607327782	0.433774614	0.352824564	0.527543219	0.746579451	0.867105248	0.862997201	0.799072347	0.714224003	0.70527367	0.711703146	0.708006572	0.70781653	0.782366087	0.857000332	0.856997201	0.749312215	0.532839769	0.354336489	0.427760761	0.60401964	0.680285101	0.626486858	0.461742408	0.23496631	0.062401029	-0.003622892	-0.059901463	-0.228170661	-0.439780192	-0.619634748	-0.673866052	-0.606125811	-0.441967915	-0.361246088	-0.528545046	-0.746528879	-0.859878391	-0.861823801	-0.7946897	-0.719281095	-0.703157571	-0.709080648	-0.707066775	-0.719636918
0.040275607	0.142269692	0.267937396	0.410686899	0.495553424	0.515719299	0.48145811	0.413177357	0.342106693	0.29803266	0.317660589	0.400489256	0.538417997	0.666184769	0.778799777	0.812925834	0.773741757	0.673788618	0.535945818	0.411041235	0.316945385	0.292239233	0.334442664	0.406278483	0.47658319	0.52238522	0.500093543	0.410562752	0.275438234	0.145974376	0.0470247	0.002607794	-0.036389729	-0.142276748	-0.279431948	-0.402329487	-0.490906336	-0.519657416	-0.474664463	-0.408015662	-0.337130306	-0.299550431	-0.311838757	-0.401368502	-0.534547677	-0.66950444	-0.766147039	-0.813286761	-0.770506596	-0.676253796
-0.177429566	0.815748118	0.295550647	-1.295903664	-1.599050488	2.34230638	-0.672492484	1.833353242	-0.514096576	0.521232381	1.664691666	-0.103663323	3.313875275	0.443285304	0.533211564	0.739333282	-0.962355424	3.934106888	2.29905007	-1.325396231	2.710226869	0.108876535	0.982119116	-0.62555177	0.456007664	1.785055369	0.937699364	2.16786244	1.740657616	2.304413311	-0.130664184	-0.910594289	-0.432378572	0.916189804	0.023054276	-0.847705148	1.648586121	-1.478472072	0.090367208	0.31474789	-2.768459379	-0.688779603	-2.433481817	0.053192403	0.805198707	-1.710220053	-1.41159641	-1.390288766	-0.723008493	-1.145937828
0.013317116	0.074900179	0.161550012	0.248449659	0.326212735	0.3953312	0.447457842	0.486817607	0.527705324	0.58376243	0.650804056	0.731683883	0.81336663	0.901681509	0.966935534	0.967203407	0.944758425	0.906994547	0.822435122	0.74025619	0.651264662	0.584371445	0.531367246	0.480680589	0.450863568	0.396772233	0.328875792	0.242408167	0.158754751	0.072340943	0.016678119	-0.002547345	-0.014382909	-0.083256568	-0.157108182	-0.246214086	-0.323299978	-0.386552017	-0.446804728	-0.49710107	-0.524910505	-0.581856793	-0.646667273	-0.731369848	-0.822944475	-0.895489395	-0.95341876	-0.981308876	-0.967452504	-0.89445627
0.095202475	0.206235638	0.283661713	0.38870317	0.471829637	0.559902658	0.630438471	0.699596744	0.773801489	0.81277863	0.889998103	0.912840434	0.95073815	0.983878204	0.990631946	0.992267423	1.000615572	0.978167341	0.947829852	0.911762277	0.883792748	0.828466858	0.781072514	0.69298574	0.297882568	0.567303718	0.471778862	0.385220741	0.291369259	0.204851934	0.090343941	0.010905444	-0.091731862	-0.196264246	-0.3046663	-0.375700782	-0.473663683	-0.568319539	-0.629972425	-0.695689027	-0.773523348	-0.833048398	-0.887105108	-0.941451883	-0.959571331	-0.980765879	-0.982384127	-1.002159905	-1.005560424	-0.968046503
0.095823986	0.194438958	0.291709674	0.379167261	0.482571847	0.560934974	0.637617721	0.722477402	0.797621425	0.842647484	0.895551543	0.937829169	0.970321621	1.006910673	1.023213439	1.026518766	1.027610083	1.004829488	0.986976905	0.975501557	0.924248407	0.868400886	0.800738849	0.746381775	0.668192307	0.57574533	0.482803777	0.416839924	0.313330252	0.209427838	0.11127325	-0.014564062	-0.102543957	-0.21391625	-0.306127693	-0.406372039	-0.498675524	-0.599072912	-0.678048356	-0.759439707	-0.816333107	-0.883457309	-0.950008644	-1.000477554	-1.034670653	-1.063675408	-1.079863446	-1.090746892	-1.074391297	-1.059420598
0.183982498	0.342413265	0.476401362	0.589491294	0.64777212	0.672028496	0.716401983	0.706416351	0.720515165	0.736070604	0.794359547	0.844905513	0.915304998	0.965159282	1.005022073	1.012404867	1.006245902	0.969959819	0.933216403	0.864801209	0.819504606	0.763446082	0.728878112	0.712555973	0.72225511	0.703286704	0.652916719	0.602189706	0.475714646	0.351921904	0.185614465	-0.01042744	-0.1659298	-0.320675031	-0.46839492	-0.554846778	-0.632361979	-0.642163238	-0.657211169	-0.662216177	-0.672782413	-0.692650241	-0.727826167	-0.761902431	-0.83256874	-0.861343003	-0.893275231	-0.898135732	-0.906746032	-0.857448445
0.193657581	0.356030964	0.475657283	0.543971519	0.561275313	0.56833898	0.617071519	0.641995316	0.728383749	0.808780598	0.882365104	0.921204439	0.957057914	0.937349181	0.919696883	0.912219084	0.923277819	0.942870729	0.953487372	0.932735831	0.869763017	0.808931804	0.733059631	0.64799801	0.597238283	0.584030233	0.553888945	0.542597429	0.468703976	0.366969046	0.186812856	0.006578845	-0.187200796	-0.370838142	-0.486566375	-0.541193416	-0.562129586	-0.573037174	-0.606328632	-0.664249604	-0.720995619	-0.810476803	-0.893387033	-0.91901828	-0.945267893	-0.952086309	-0.923769272	-0.926989952	-0.929729294	-0.93931605
0.267393225	0.492798233	0.611838724	0.650409843	0.624961265	0.582655315	0.577501513	0.598989015	0.670412367	0.778244105	0.876967084	0.918624605	0.938719679	0.902435556	0.862143524	0.846665848	0.871085303	0.901258913	0.931658249	0.926788483	0.879401392	0.774824967	0.681779912	0.599834971	0.578878736	0.575550966	0.618402476	0.658381942	0.62393027	0.498055844	0.274759695	0.006255855	-0.260225251	-0.479695848	-0.605835123	-0.66432197	-0.625328403	-0.586690291	-0.570754525	-0.597428708	-0.675795513	-0.783761159	-0.866223078	-0.929632006	-0.931394801	-0.899218422	-0.862073692	-0.85358204	-0.865120992	-0.890532123
0.09194095	0.20095902	0.300767232	0.359764004	0.462997399	0.54530209	0.639162157	0.694719966	0.760605088	0.833194301	0.873269533	0.917668536	0.963312451	0.978087942	0.998347586	0.991896247	0.997727972	0.987637589	0.961327774	0.931651208	0.883575515	0.829686824	0.775006434	0.726658022	0.630329458	0.554464771	0.485401644	0.375078648	0.28745123	0.205336062	0.10146189	-0.003615766	-0.110695316	-0.192465331	-0.286029254	-0.390967769	-0.472551918	-0.576232196	-0.642141491	-0.703153888	-0.774056653	-0.837283213	-0.89314623	-0.934727627	-0.956173223	-0.969902278	-0.995929711	-0.986217786	-1.003367688	-0.978917015
0.03273849	0.148152448	0.28795465	0.428952369	0.509275452	0.532167552	0.483725246	0.387015835	0.314930353	0.263237021	0.269754312	0.363641938	0.495577233	0.645387413	0.747510187	0.7870341	0.749549063	0.631056181	0.489491687	0.359160325	0.278608098	0.258834462	0.313928903	0.390792967	0.482869227	0.534226089	0.500365378	0.421777755	0.293629152	0.149729867	0.043269871	-0.002440377	-0.037215932	-0.14834093	-0.285807482	-0.420702128	-0.512001389	-0.532333725	-0.482231154	-0.399053253	-0.298176048	-0.254801518	-0.267037447	-0.360702643	-0.483964655	-0.633415828	-0.74524996	-0.780662773	-0.754870652	-0.642834064
0.265833391	0.483442769	0.598648134	0.647975297	0.622022017	0.571129385	0.573001884	0.607480691	0.68663085	0.79158559	0.871791725	0.908848449	0.918232304	0.886886741	0.870017772	0.86478309	0.875821937	0.905635902	0.930539934	0.906818394	0.865414849	0.782362139	0.685069151	0.609669434	0.560749965	0.582224057	0.620696821	0.647699064	0.608523062	0.486836511	0.269213623	0.004231685	-0.267782501	-0.486072089	-0.596784762	-0.643413191	-0.61209508	-0.580143233	-0.572351947	-0.603767337	-0.687684109	-0.784122801	-0.869875679	-0.90747099	-0.909606027	-0.897867609	-0.869759924	-0.856659947	-0.873210134	-0.900506482
0.081100235	0.1829032	0.291607005	0.375979955	0.477828869	0.532027303	0.626199697	0.71338432	0.775802274	0.836773809	0.885616875	0.92294963	0.95220138	0.976233518	0.994373326	0.999129224	0.98825014	0.983824229	0.972435413	0.939233206	0.896858416	0.822448802	0.76724281	0.701843905	0.629847375	0.549472529	0.477619671	0.382778493	0.286890663	0.200525272	0.095015035	0.000669286	-0.109630173	-0.196929617	-0.302705323	-0.389898831	-0.46628327	-0.54529867	-0.623983832	-0.696218211	-0.769607119	-0.82945517	-0.889541307	-0.924777006	-0.969970013	-0.977483199	-0.996910449	-1.015680891	-0.994049276	-0.981038596
0.099449747	0.204450174	0.289459418	0.387434786	0.480973877	0.566813545	0.640705832	0.708304983	0.783373594	0.844804909	0.896327262	0.956105976	0.992087355	1.016497306	1.021327844	1.016979972	1.018572998	1.016513693	0.988750506	0.975530481	0.91110523	0.87793542	0.811215618	0.746361029	0.674379264	0.584681217	0.493747007	0.407885916	0.304317925	0.208312727	0.104288792	-0.00361152	-0.115261612	-0.20800632	-0.294087691	-0.421878937	-0.496324797	-0.604803666	-0.679336844	-0.749081597	-0.835048182	-0.89176651	-0.942864373	-1.003231289	-1.011797979	-1.059600489	-1.060508471	-1.070377939	-1.079872173	-1.066712448
0.210354624	0.394227472	0.542582257	0.633285053	0.699154808	0.701823006	0.715275846	0.696975686	0.704543943	0.723345264	0.761199888	0.820411489	0.879815271	0.947866272	0.996065518	1.022655238	0.999007612	0.947574377	0.899252784	0.825248539	0.764161768	0.735912802	0.703117839	0.717319694	0.73749627	0.733945846	0.705370838	0.644991569	0.545762913	0.373444949	0.208466706	0.011861627	-0.19271384	-0.375090818	-0.519306465	-0.607230834	-0.66753364	-0.674861329	-0.663939521	-0.662681066	-0.659462301	-0.667190311	-0.697746613	-0.735243777	-0.79515506	-0.860577205	-0.87311657	-0.895616734	-0.902547067	-0.855564944
0.646181263	0.923164798	0.737409751	1.206764456	-0.206300974	1.378319441	1.298168536	0.810888895	1.518715836	0.157884333	0.886225808	0.845894367	0.768465764	1.207789171	1.246997139	0.524020433	1.965229232	0.457060588	1.290599531	1.831537476	0.43832984	0.395857804	1.795029099	0.595749753	1.440498425	0.558150174	0.426502999	1.392810484	0.43076975	-1.048133995	1.03479538	-0.844562677	0.051594145	0.658477598	-0.541503784	-0.036160598	-1.559833647	-1.020710814	0.010193369	-0.115724531	-0.434337356	0.563200517	-0.709525385	-1.699782034	-1.861507142	-2.098189901	-1.570102211	-0.281253599	-0.362944474	-1.101928427
0.105019306	0.194568602	0.299280466	0.379257539	0.46800853	0.557196812	0.628435991	0.713409731	0.779045317	0.835253997	0.874889681	0.91823709	0.951836206	0.984359902	0.998188316	0.999427424	0.992783752	0.976881057	0.958043093	0.911719486	0.87945234	0.82880866	0.772511063	0.70836257	0.629958636	0.558809003	0.467615952	0.380575202	0.289350023	0.191734508	0.094537832	0.013677197	-0.096400854	-0.191120474	-0.295613135	-0.368508174	-0.471028132	-0.556168887	-0.626635276	-0.717933958	-0.77415665	-0.822888234	-0.888471687	-0.920823332	-0.955914684	-0.980511283	-1.002324821	-1.002245051	-0.985544635	-0.978889043
0.247460313	0.439074909	0.561742769	0.618588532	0.59783164	0.578572921	0.583024363	0.611440116	0.695860605	0.80079901	0.880635648	0.914134217	0.94061684	0.902463615	0.903074631	0.889861411	0.873500727	0.929035917	0.950228115	0.915261136	0.892086838	0.785229442	0.692617034	0.62334535	0.573171016	0.590960519	0.59791485	0.607126401	0.561202973	0.429073009	0.24786137	0.013390049	-0.24020809	-0.449248345	-0.577276741	-0.621466653	-0.599416246	-0.580264227	-0.580928339	-0.630699072	-0.700410757	-0.791450448	-0.875889177	-0.931586174	-0.926846446	-0.91558034	-0.883010093	-0.864948433	-0.89092675	-0.909182494
0.090972335	0.182942216	0.287972354	0.384895192	0.471104737	0.555405488	0.630771989	0.714281055	0.777687281	0.834498989	0.879107121	0.935970098	0.946216566	0.980883745	1.018889261	0.999097689	0.98219216	0.975577951	0.947298008	0.912793191	0.895696871	0.826570778	0.780055271	0.712343562	0.636563993	0.560078103	0.47955051	0.370865075	0.286838445	0.189529114	0.099721485	0.005890294	-0.091469208	-0.190331851	-0.290197643	-0.38884871	-0.462849848	-0.545787059	-0.612862664	-0.701746654	-0.775999006	-0.837408558	-0.874124489	-0.915736681	-0.945968624	-0.980318	-0.978532398	-1.004293579	-1.002615255	-0.979614375
0.040235983	0.158468001	0.303330016	0.446368079	0.524571939	0.530555096	0.477460926	0.377723923	0.276942158	0.218317552	0.220376896	0.31810192	0.45237502	0.600265286	0.711129233	0.751299134	0.706809761	0.596953894	0.449562936	0.318985035	0.226040352	0.217094474	0.273460946	0.373678845	0.465997551	0.544001014	0.529342909	0.440652997	0.303219843	0.168186754	0.043658651	0.004246404	-0.042586285	-0.157110028	-0.29623264	-0.429988027	-0.53099499	-0.535455736	-0.479150597	-0.377559486	-0.275238583	-0.219938042	-0.227858436	-0.314084105	-0.441146391	-0.592256099	-0.710532079	-0.758810162	-0.712432045	-0.602633052
0.19215043	0.362677519	0.510596058	0.603875322	0.65633229	0.688599091	0.71543114	0.692545635	0.696800551	0.736370881	0.77964366	0.832064833	0.892224021	0.962391995	0.998327172	1.011710943	0.999664517	0.966111816	0.915778016	0.849168873	0.779965484	0.747435305	0.740115006	0.723121192	0.712660337	0.703902758	0.67672369	0.617097289	0.506377495	0.363063393	0.184648578	0.005871011	-0.180853453	-0.347271741	-0.483898865	-0.577779613	-0.642227421	-0.671080428	-0.662224003	-0.668703681	-0.65958807	-0.675578213	-0.717671331	-0.753745398	-0.815955575	-0.848650413	-0.896781258	-0.895128148	-0.895587458	-0.864876255
0.075273885	0.274512532	0.501660347	0.70307742	0.77768261	0.701935448	0.526249927	0.474563985	0.667178912	0.913761514	1.055465999	1.053652741	1.001609218	0.940383671	0.926440063	0.947287111	0.942594748	0.954196571	0.9935513	1.063099717	1.049308666	0.906337663	0.672415937	0.471849287	0.522595081	0.70528337	0.781475516	0.701542848	0.501622523	0.276613385	0.067929575	0.001933125	-0.079091255	-0.25643891	-0.506648392	-0.69658402	-0.776920032	-0.69398315	-0.530258207	-0.46564097	-0.671305902	-0.910729099	-1.056448111	-1.067922716	-0.993551632	-0.945480325	-0.940593652	-0.948398857	-0.946182898	-0.956931422
0.107335443	0.194783008	0.299447806	0.394629081	0.465877233	0.574341902	0.660103724	0.705832524	0.78203983	0.850509499	0.892927499	0.960523775	0.99266386	0.990106804	1.034928229	1.036498848	1.017714361	1.020199402	1.000136171	0.960413301	0.901351928	0.862743983	0.798562441	0.729653212	0.661559391	0.59227729	0.508223825	0.402662529	0.31983222	0.216070721	0.111039484	0.002110066	-0.102396016	-0.19617333	-0.317993232	-0.412266129	-0.508040955	-0.593193636	-0.680657927	-0.761713428	-0.823518168	-0.878958669	-0.950092416	-0.994844312	-1.036125478	-1.056128061	-1.072230776	-1.062679684	-1.078603549	-1.085314908
0.093757406	0.202047144	0.29669928	0.38230197	0.462627657	0.561058909	0.6372543	0.69540081	0.775773274	0.827056564	0.874036796	0.922172269	0.959255463	0.982953968	0.995499442	0.994579878	0.987539495	0.974567916	0.964888952	0.925171589	0.882564798	0.828120399	0.770476894	0.70723636	0.627854257	0.557588567	0.470001696	0.379343402	0.288966126	0.206786353	0.1017426	0.004804933	-0.093062828	-0.18907036	-0.289204124	-0.381490327	-0.4759585	-0.559731428	-0.626249365	-0.695094043	-0.771125465	-0.826127609	-0.886625125	-0.924924471	-0.959300007	-0.98122945	-0.991996648	-1.002902979	-0.990039118	-0.977624792
-3.69435555	-2.788741186	-2.065940828	0.323050509	1.385034535	4.159684159	-1.540329663	2.903292126	0.907858779	0.465568471	2.973786478	-1.881980485	0.779974856	-0.184720669	1.212631329	0.158845939	3.37129675	4.27028117	1.694327466	-0.670023887	3.131018438	1.474898699	0.581292337	-4.28919557	2.299798964	-1.081944487	0.207874955	2.319010236	1.931051451	-2.310279784	0.536269211	-0.498222965	-3.687044582	0.569215206	1.871001568	0.164731015	-1.970273999	1.553872216	-1.726889462	-4.938957965	-0.487443516	-0.779072786	2.663480259	2.47405323	0.260406933	-3.740324825	-2.128246614	-4.139126851	-5.257495638	-3.256207026
1.159633746	9.338157372	2.857123423	-4.934059992	-6.298990788	-4.871191026	8.490128747	-2.426021887	-3.606721686	-0.675986727	4.715524417	9.027369485	2.200207686	-0.765817622	-0.155217164	7.165527017	9.425297599	2.342937284	-8.69366406	0.842340488	-1.703332973	-10.16274833	-0.674990331	-1.376679745	7.569859983	1.716211518	1.523876593	3.998237833	-4.717955834	6.638390929	-1.517515132	-1.10777997	-5.044865814	-1.626888447	9.07371481	-8.211666008	1.682684587	-0.733349782	-1.020304033	9.002990512	3.872972646	-3.278738373	-3.505647245	2.668012776	-0.364622268	-5.3769485	-5.673592983	-3.278594325	-9.885472431	-4.827632805
0.146787027	0.775456088	-0.735623873	0.515563706	2.82169805	-0.670862855	0.754502268	0.085063988	2.233702693	4.140754071	2.701921566	1.232255654	2.152798354	3.175428544	2.511809007	3.703531849	0.334207756	0.694367107	0.021486701	-0.870467859	-0.836639755	-1.656525137	1.662645975	0.915410219	0.66951929	-1.584579308	-0.264407004	1.238689007	0.550057844	0.729075183	1.738120327	-1.086082655	0.342931293	-1.269696338	-1.440776971	0.520636429	-0.795016782	-0.046599677	0.056862703	-0.164654921	-3.492069364	-1.176348294	-1.02828743	-0.920777697	-0.891831005	-3.60916941	-0.86965692	-3.876014395	-0.380314113	-3.640875112
0.077569746	0.195329669	0.310605892	0.371505816	0.461773749	0.541287038	0.623960306	0.694011751	0.777540647	0.823151758	0.877589832	0.925119188	0.956360509	0.994401274	0.986337023	1.012526602	0.999099325	0.984934549	0.953550255	0.927128066	0.867498926	0.827436955	0.775242937	0.709882459	0.638678946	0.560944892	0.470923163	0.387113893	0.280853054	0.183755164	0.090426559	-0.00381616	-0.089904088	-0.199513391	-0.281883594	-0.381891053	-0.474680478	-0.557679947	-0.61643397	-0.694641976	-0.761664633	-0.831752249	-0.888147363	-0.930971516	-0.97561708	-0.977327105	-0.990885356	-0.980497469	-0.971315789	-0.989413114
0.101032718	0.197910801	0.290768055	0.393189228	0.476921711	0.567513939	0.645212288	0.720531753	0.78699258	0.844034316	0.901285617	0.948260221	0.982308755	1.002598333	1.021737236	1.033951197	1.024903302	1.011877361	0.988570629	0.962740926	0.925800597	0.864917535	0.823016442	0.731492076	0.671275561	0.586344697	0.497241213	0.404939933	0.313433906	0.205256011	0.110352247	-0.00404383	-0.102225714	-0.204687255	-0.301283699	-0.40986092	-0.496155044	-0.597305818	-0.686623111	-0.771625756	-0.831264329	-0.888133649	-0.941144556	-0.992209482	-1.025634299	-1.046111883	-1.076162069	-1.092872936	-1.073517641	-1.063550732
0.194110061	0.355757817	0.452263136	0.510204584	0.562209905	0.575622283	0.612177378	0.645304017	0.720003581	0.799914435	0.882297933	0.922036479	0.947993297	0.930936489	0.93697332	0.935724748	0.9322087	0.939687406	0.952762794	0.92625818	0.892340992	0.812263696	0.740982041	0.640182748	0.601347835	0.583578633	0.554469192	0.529498723	0.452544359	0.347305627	0.191753843	0.011391275	-0.195786661	-0.341352496	-0.46297445	-0.52200997	-0.552088104	-0.568579234	-0.601703854	-0.671305924	-0.725770625	-0.800214804	-0.879054502	-0.924812727	-0.937572884	-0.95032739	-0.928200243	-0.926988208	-0.925102502	-0.947823852
0.103599633	0.193695527	0.290874531	0.378700899	0.474102959	0.547297905	0.645326334	0.703280189	0.76885721	0.833708257	0.86863426	0.933303304	0.951330307	0.972530766	0.980691514	0.987128557	0.99751115	0.978267675	0.952678534	0.923271581	0.87504349	0.822677813	0.762011723	0.713656273	0.637100178	0.553532658	0.470325061	0.383348612	0.290206033	0.213504675	0.104864894	-0.001044345	-0.100933919	-0.20084735	-0.294725407	-0.37869941	-0.46081365	-0.565781225	-0.639040169	-0.70229201	-0.76780511	-0.836916961	-0.878968313	-0.925099272	-0.968535534	-1.00031756	-0.990555603	-0.99807479	-0.994709363	-0.980203558
0.084888049	0.19714905	0.286201784	0.374297706	0.472367995	0.554805037	0.631515797	0.723573184	0.786665153	0.846805158	0.900052249	0.937640163	0.971754727	1.00793814	1.0210544	1.025030179	1.036671817	1.013423496	0.991121637	0.948165805	0.927551662	0.878036432	0.804445942	0.738664161	0.667527543	0.595307312	0.482146801	0.413526092	0.294186472	0.21558967	0.100948144	-0.005440885	-0.09778063	-0.201690735	-0.320050195	-0.408720796	-0.500806432	-0.596425972	-0.680417268	-0.752104444	-0.824626702	-0.895924777	-0.949751912	-0.988821607	-1.023798974	-1.075499374	-1.08674331	-1.096201631	-1.075616903	-1.078537925
0.081861684	0.189918188	0.281205404	0.388625457	0.480314254	0.549150232	0.644337504	0.701174816	0.755034477	0.842814323	0.866292013	0.925744915	0.96122582	0.978442818	0.99837057	0.997263887	1.003897226	0.979950266	0.966532264	0.912084026	0.881276865	0.841488576	0.777954945	0.715365207	0.948553302	0.560574037	0.481610235	0.372434631	0.299262961	0.195367051	0.102710919	-0.001686406	-0.105931212	-0.196543886	-0.27698133	-0.38773589	-0.45546615	-0.546144748	-0.638321775	-0.707921993	-0.780850913	-0.820032876	-0.895331131	-0.924786723	-0.967385824	-0.979315661	-0.995365643	-0.993803232	-1.002636562	-0.990155148
0.099985171	0.198025572	0.292527852	0.366251186	0.487325395	0.56178344	0.651844239	0.711788853	0.776353021	0.863612234	0.900823144	0.936182001	0.987116039	0.979023171	1.021973486	1.008937582	1.024880705	1.003187393	0.988034225	0.948153424	0.921970558	0.860787723	0.818207406	0.731682916	0.657239963	0.574328166	0.499867004	0.407172128	0.310962056	0.205373294	0.087866304	-0.004967749	-0.097145039	-0.227458768	-0.309705763	-0.401973113	-0.501829219	-0.590170044	-0.681868275	-0.765492106	-0.818714118	-0.902192455	-0.933590993	-1.002741098	-1.051419995	-1.06389764	-1.066158752	-1.103255607	-1.076265111	-1.057576123
0.102610061	0.196667529	0.287486594	0.38087588	0.463782581	0.562900425	0.625796004	0.702116512	0.768820588	0.840629041	0.875379801	0.918388151	0.947133878	0.9761097	1.004028147	0.998239877	1.003555819	0.980224413	0.96210594	0.92049254	0.877107885	0.838173402	0.782307263	0.706186741	0.33789896	0.559821422	0.468395948	0.37845216	0.295226612	0.200800944	0.102222768	0.00837876	-0.104976091	-0.190638243	-0.29584642	-0.372367151	-0.474693345	-0.549226158	-0.648609599	-0.714230512	-0.773744245	-0.835312403	-0.885046604	-0.927824715	-0.95068944	-0.976058585	-0.994714747	-1.003900849	-1.001732765	-0.986174364
1.015664316	0.650331647	1.346884702	-0.15883545	1.178681458	0.702325361	0.25639704	-0.69440198	1.549832504	0.715700949	2.714784915	0.091405785	2.183919559	1.002137106	1.368182481	-0.235994449	1.300132669	2.653867494	1.551798362	-0.61762765	3.282565761	1.804965532	1.669925183	2.653317042	-0.688508877	1.999126041	-0.068156979	1.453262461	-0.461826269	0.889077811	-0.348885405	-1.39877536	1.939511701	-0.42700237	0.463338785	-2.444350957	-1.515171057	-0.187260966	0.721930481	1.449913067	0.824055272	0.750603916	-1.42288056	-1.254063227	-0.131043354	-3.167862778	-1.760526609	-1.340371053	-1.417640331	-0.333688737
0.099059213	0.202372348	0.293759959	0.380570977	0.482570345	0.556402105	0.627207972	0.709683512	0.771168119	0.828349806	0.864555789	0.911497038	0.957874617	0.980119051	0.990378327	1.013841144	1.004452993	0.958923523	0.96620558	0.930697279	0.883320659	0.828866525	0.768536283	0.714406834	0.636251901	0.56039038	0.4840237	0.3866664	0.296756163	0.209137049	0.106658985	-0.006005052	-0.10823047	-0.185293252	-0.285962068	-0.379316356	-0.478793347	-0.546171034	-0.631977505	-0.709559132	-0.769201447	-0.829232357	-0.872725361	-0.92396818	-0.959944941	-0.980772145	-1.005173432	-0.999223316	-0.986725135	-0.987526848
0.108591101	0.195715637	0.283697425	0.383459972	0.473004293	0.552583957	0.639605588	0.721992487	0.781444564	0.850645162	0.896911911	0.944888279	0.979964587	1.003652261	1.0297038	1.027265602	1.02650519	1.008640364	0.998343327	0.963086229	0.917646983	0.870444206	0.802057925	0.74678702	0.671395311	0.58216173	0.501980088	0.40530565	0.300507871	0.198191108	0.10667573	-0.000239295	-0.0942475	-0.209155928	-0.299651049	-0.415643317	-0.496519492	-0.588279197	-0.681125445	-0.766615922	-0.827314277	-0.883093913	-0.951405057	-0.992545796	-1.041370232	-1.060142957	-1.068287891	-1.076367171	-1.078645927	-1.064412308
0.166966151	0.339495143	0.476652405	0.563396819	0.653253223	0.672786817	0.700381348	0.705605611	0.728126354	0.751267688	0.78779244	0.852570954	0.902446263	0.954417589	1.000460068	1.023600452	1.010802628	0.97129117	0.918094171	0.864292745	0.806203017	0.759547158	0.74278663	0.723744094	0.717777029	0.691090876	0.652892486	0.57913496	0.490696279	0.341137766	0.181467634	0.008752449	-0.185110932	-0.332718243	-0.465345161	-0.544418328	-0.611679892	-0.648221169	-0.664499005	-0.677153147	-0.669105432	-0.705352782	-0.726461891	-0.779720423	-0.813023966	-0.85896121	-0.896518257	-0.906159761	-0.908638041	-0.860055651
0.106407042	0.198105685	0.28691517	0.396397667	0.477915689	0.560057833	0.647360195	0.728594542	0.784431052	0.853132534	0.910819361	0.954036335	0.983912266	1.008810543	1.008176279	1.036079574	1.035761103	1.016955576	0.989911044	0.956381141	0.908831111	0.87330611	0.822202339	0.746182714	0.668639187	0.576153324	0.50388475	0.393446081	0.312500776	0.211287517	0.109838524	-0.00110502	-0.103591019	-0.210856415	-0.310606593	-0.407669742	-0.498824307	-0.589548157	-0.682927296	-0.753316989	-0.821887883	-0.888708915	-0.936249042	-0.992990696	-1.035066782	-1.056072777	-1.07689375	-1.085483888	-1.081023162	-1.055298361
0.093382804	0.192603689	0.283289067	0.386386801	0.469438883	0.569539364	0.640055007	0.725210036	0.778530662	0.852457063	0.909914122	0.9466528	0.988641243	1.011402657	1.020731271	1.028125292	1.03272946	1.017109426	0.997390756	0.965111063	0.914233032	0.87002435	0.815257263	0.747859338	0.672423112	0.587371143	0.501342507	0.403216126	0.303736047	0.209469136	0.10024286	0.009597845	-0.094732287	-0.202095046	-0.313932237	-0.420395959	-0.515785184	-0.589987125	-0.67692859	-0.760037473	-0.824457711	-0.909150235	-0.949279599	-1.00030434	-1.052448193	-1.070091877	-1.096009719	-1.103128263	-1.10743487	-1.093856921
0.100070894	0.182771931	0.298061686	0.394432243	0.486158085	0.56635224	0.643965483	0.718182498	0.787969516	0.833230161	0.901355991	0.953486157	0.970814744	1.002352203	1.027991026	1.038662904	1.025080683	1.005306712	0.99260583	0.966704991	0.906845424	0.859725505	0.796231384	0.738631333	0.682327652	0.601880911	0.508514122	0.407335581	0.287822618	0.213598961	0.127687031	0.003976719	-0.099381565	-0.195582103	-0.302168291	-0.402802917	-0.511139401	-0.584559719	-0.678689921	-0.751321055	-0.814142972	-0.890378385	-0.944125959	-0.996428667	-1.044960085	-1.082371139	-1.07938793	-1.081933115	-1.090233853	-1.069834527
0.102086343	0.205750842	0.28599678	0.382565712	0.476916808	0.558266135	0.645812924	0.700358935	0.777775914	0.839026417	0.885393239	0.922144707	0.964635541	0.983972703	0.997040479	1.001119992	0.999774306	0.979334425	0.959318185	0.922485818	0.897479468	0.833971295	0.773218061	0.712936184	0.64039284	0.554805549	0.464236894	0.380615845	0.282299011	0.188667674	0.111989384	-0.00661718	-0.091097033	-0.193122701	-0.283998764	-0.381448808	-0.466324147	-0.547090267	-0.64148652	-0.698756633	-0.768903549	-0.831139064	-0.895304044	-0.918455851	-0.965170126	-0.974931812	-1.00594925	-0.992450897	-0.999133401	-0.989675351
0.089117514	0.19283788	0.298429714	0.37537608	0.462356807	0.552945929	0.633951197	0.713057676	0.767447354	0.828377424	0.877810804	0.919391793	0.944436944	0.975354185	1.002137348	1.00178608	0.999938978	0.975919774	0.959128992	0.928301647	0.882450236	0.832227481	0.774449374	0.703973535	0.63624994	0.558783335	0.464386491	0.374570654	0.287829296	0.19688906	0.096038683	0.004355691	-0.084902488	-0.203896249	-0.304687011	-0.380725958	-0.478220426	-0.552487232	-0.636750123	-0.704829174	-0.772108264	-0.830635847	-0.886149551	-0.922037805	-0.945994596	-0.979892844	-0.99315271	-1.004437447	-0.992021307	-0.981539937
0.019086331	0.07522914	0.164289322	0.25733303	0.341007182	0.407502827	0.452650978	0.481886313	0.520835908	0.574416347	0.64122243	0.718087811	0.818145635	0.888143993	0.951100696	0.974923965	0.965057615	0.896445945	0.812133808	0.724125925	0.636993639	0.568857339	0.523787133	0.486903498	0.444979805	0.409377847	0.333897767	0.25737178	0.17204316	0.085890526	0.012734208	0.005024128	-0.01400482	-0.084620132	-0.167369174	-0.251143643	-0.340556678	-0.405757702	-0.45107075	-0.481910562	-0.519790365	-0.575464889	-0.632754579	-0.716956862	-0.809381695	-0.901127193	-0.946381608	-0.974848805	-0.948490761	-0.88631212
0.104270426	0.190689382	0.27824586	0.364067598	0.471189268	0.561804359	0.625384513	0.710393236	0.776607923	0.829041764	0.878911501	0.936388047	0.947422247	0.979318671	0.998083411	1.004923118	1.001211173	0.966232796	0.959276823	0.917996963	0.886357376	0.84831926	0.771823406	0.700244197	0.928967589	0.562986764	0.474915157	0.384392167	0.288018206	0.189414243	0.109334554	-0.001376592	-0.097703778	-0.187926008	-0.287615536	-0.385722145	-0.474058281	-0.558832155	-0.629616701	-0.715970325	-0.78000257	-0.837171687	-0.885098898	-0.917329217	-0.951743147	-0.975177008	-1.001501162	-0.989935074	-0.989980576	-0.97581802
0.092129471	0.201903574	0.296365692	0.390165334	0.470995898	0.557310538	0.634935441	0.703589756	0.773198772	0.837199742	0.893400384	0.919991597	0.965594359	0.968898433	0.98037325	0.999486624	1.003267303	0.980960256	0.955306993	0.924084127	0.887048315	0.825831103	0.778871058	0.717570076	0.376411633	0.546980256	0.484789919	0.378806397	0.29997862	0.198963292	0.087447367	-0.007480318	-0.093934293	-0.197609125	-0.291353863	-0.371484851	-0.483875743	-0.549489172	-0.632368637	-0.707619104	-0.764709303	-0.83862333	-0.877393571	-0.913366963	-0.952122362	-0.974775026	-0.989369153	-1.002370642	-0.983719358	-0.990628908
0.099515629	0.197209937	0.294164944	0.39323245	0.475549572	0.5589909	0.64951769	0.721020387	0.788207848	0.856723384	0.900122163	0.950627269	0.990346376	1.010440104	1.020589194	1.031240184	1.022846934	1.013244106	0.990879459	0.959836479	0.91472769	0.867901251	0.808920031	0.747362486	0.667988234	0.578272306	0.494688203	0.401584803	0.307788656	0.209181981	0.096571624	-0.003564963	-0.109134019	-0.208829999	-0.296330714	-0.4028405	-0.50206969	-0.582385789	-0.675491084	-0.750447006	-0.833070248	-0.898519961	-0.944648775	-0.992912755	-1.027081589	-1.058686748	-1.073479023	-1.082423378	-1.070170283	-1.063480173
0.098957158	0.199010957	0.288226938	0.387251553	0.48750041	0.558648541	0.63922379	0.728408079	0.789381027	0.845561871	0.895151577	0.946105071	0.976714297	1.007813834	1.021566641	1.031359663	1.034479654	1.010334711	0.981810603	0.95778908	0.914906601	0.871791084	0.799936238	0.731389489	0.672584107	0.588571251	0.49517263	0.414817329	0.3019971	0.21804011	0.106786559	0.001656395	-0.104075423	-0.196204415	-0.310700637	-0.412743181	-0.492115154	-0.591678803	-0.674916832	-0.757777671	-0.822882146	-0.898479359	-0.949792403	-0.989185604	-1.044692841	-1.059802091	-1.076031359	-1.080509353	-1.075526768	-1.070252277
0.013038431	0.085632466	0.179512154	0.272839301	0.364964995	0.427667154	0.457314548	0.46904705	0.505783224	0.541513706	0.614854714	0.690785822	0.783060191	0.868946265	0.947740216	0.96154573	0.939278364	0.871060003	0.784857729	0.679664706	0.608926012	0.538466482	0.504264092	0.481796516	0.459047856	0.436591767	0.364892052	0.277746521	0.182943431	0.087528454	0.030607389	0.00657032	-0.024301805	-0.087783991	-0.177984309	-0.276923675	-0.354460257	-0.422096875	-0.451412147	-0.477240049	-0.508094365	-0.535087632	-0.601367791	-0.683010066	-0.793227449	-0.871092825	-0.942140144	-0.965580723	-0.939559218	-0.882792255
0.02181038	0.078859304	0.161874332	0.256362684	0.33395016	0.402425038	0.46093401	0.483637992	0.5248214	0.570846456	0.645286704	0.723413321	0.822897622	0.908299024	0.957321406	0.969642901	0.972730046	0.900968025	0.820499025	0.729298222	0.636831642	0.580184789	0.522319324	0.492357756	0.44656055	0.397377024	0.324451325	0.250921146	0.162441631	0.079720533	0.028125208	-0.000324387	-0.019046717	-0.073075669	-0.15939609	-0.236466373	-0.333562413	-0.393837547	-0.44606735	-0.48191619	-0.525328354	-0.577042786	-0.641370559	-0.726248833	-0.820429749	-0.895033267	-0.939395304	-0.981177385	-0.961190114	-0.908777823
0.094226283	0.208173995	0.297591237	0.386270874	0.47686001	0.56009261	0.634072437	0.710849512	0.792795747	0.839859734	0.890213901	0.924673741	0.946276203	0.993032351	1.015618348	1.003318013	1.00083127	0.974542374	0.957820949	0.917833273	0.885166109	0.836328565	0.767462269	0.715341412	0.246796442	0.54265369	0.471645356	0.394158787	0.28838211	0.202112875	0.105440716	-0.001345377	-0.102826084	-0.190913109	-0.285157498	-0.377668677	-0.462341342	-0.557418275	-0.641094894	-0.700129224	-0.768721395	-0.833813954	-0.899026233	-0.922096962	-0.94975706	-0.971225244	-0.991943788	-1.005081952	-0.990924935	-0.988902275
0.085017856	0.190122091	0.284489723	0.378857197	0.466638813	0.55957286	0.642805769	0.703260868	0.771308531	0.833397578	0.884825441	0.92462556	0.966724925	0.973046795	0.989703682	1.002638334	0.998394235	0.975197163	0.95791685	0.923330173	0.883432967	0.833523395	0.775578635	0.709126291	0.499945413	0.545903317	0.483508863	0.395651273	0.292904629	0.184063513	0.097476252	0.002099831	-0.098676118	-0.19321957	-0.280248269	-0.381788981	-0.466680969	-0.549936599	-0.638720213	-0.705178094	-0.770719018	-0.822725137	-0.879631073	-0.91461585	-0.952612497	-0.987437801	-0.993128891	-0.98250832	-1.019281097	-0.983630275
0.099512511	0.192625937	0.289020394	0.397858031	0.481876846	0.552837282	0.63933942	0.742748462	0.788842786	0.852275112	0.916617623	0.919682546	0.983254513	0.997569116	1.022527285	1.029278403	1.037071634	1.011958364	0.975548353	0.956396145	0.921921225	0.851211727	0.804010388	0.746256706	0.660520063	0.584915989	0.486690565	0.386655709	0.313078457	0.191826486	0.103166755	-0.00285669	-0.111281559	-0.211008545	-0.309286105	-0.424744021	-0.500256665	-0.600925634	-0.685083563	-0.767459085	-0.848349609	-0.892677556	-0.942891683	-0.994471275	-1.043305874	-1.06648765	-1.07144999	-1.086451614	-1.084069181	-1.072334898
0.099729308	0.19331724	0.298147337	0.381169897	0.477629373	0.53859878	0.631708115	0.713867425	0.782125456	0.843472981	0.89807665	0.932482785	0.973159215	1.011513032	1.015646417	1.030728251	1.02787715	1.027858073	1.004315265	0.955288061	0.92280181	0.850086017	0.807442317	0.734677137	0.672192186	0.586751517	0.50346806	0.408139119	0.301336869	0.192466231	0.112724101	0.00974655	-0.085331677	-0.19893723	-0.307174341	-0.410934271	-0.488518731	-0.591046442	-0.669707201	-0.749987033	-0.837841191	-0.898013574	-0.946800666	-0.981252989	-1.021166803	-1.079363522	-1.059420944	-1.075154235	-1.073480008	-1.050123479
0.094475378	0.189395192	0.291516457	0.385231263	0.482548342	0.557378004	0.640025117	0.7103233	0.788444306	0.834761742	0.879608408	0.908648755	0.947685972	0.969125806	0.981641188	1.004736247	0.986569596	0.987115301	0.960407107	0.921371047	0.891628775	0.832648765	0.787490364	0.695178261	0.640528067	0.563633164	0.47483369	0.382159399	0.296878308	0.192224477	0.091534693	0.001592473	-0.097419635	-0.195324054	-0.297595807	-0.385067199	-0.481534037	-0.551785842	-0.641532893	-0.713169519	-0.770703764	-0.823770943	-0.876418723	-0.935242214	-0.964088227	-0.984736799	-0.988180595	-1.007208406	-0.997402717	-0.984345013
0.102488733	0.195438115	0.28223912	0.399470893	0.471361325	0.582940774	0.621494759	0.719808111	0.776799942	0.859144933	0.895765921	0.945097761	0.980503964	1.010831459	1.01270989	1.042667001	1.037201325	0.998642298	1.000882493	0.960001027	0.92016335	0.869291423	0.80224764	0.754166534	0.686385416	0.571739292	0.494178077	0.408386479	0.307220168	0.207394496	0.088139822	0.007191978	-0.118889473	-0.192707177	-0.312376352	-0.414348286	-0.502627595	-0.584158657	-0.670812284	-0.762236289	-0.81982577	-0.889924908	-0.950034742	-0.994969724	-1.002465453	-1.048013822	-1.053630823	-1.068000706	-1.082231	-1.060627956
0.087688086	0.192404544	0.289869192	0.376057244	0.463275359	0.562267444	0.627986442	0.706093635	0.772388814	0.830744921	0.884538094	0.919427465	0.951494978	0.9906108	0.997611849	0.989728366	0.994162446	0.971221796	0.954258694	0.926463449	0.876483966	0.835551481	0.772262276	0.71262478	0.632969103	0.550986148	0.469407285	0.385976582	0.297527934	0.198402183	0.107212596	-0.005172796	-0.092694804	-0.188711694	-0.292825582	-0.384947716	-0.475571126	-0.562504666	-0.626086406	-0.706335415	-0.763558872	-0.834062457	-0.88534573	-0.923509307	-0.957846463	-0.989270272	-1.004451066	-0.989942793	-1.00038422	-0.985024965
0.086404125	0.199549946	0.284316865	0.39788492	0.475250758	0.549622373	0.638756062	0.704265406	0.761106639	0.825569487	0.878373798	0.92860851	0.959223805	0.972149916	0.991024942	0.995771244	0.99357518	0.980900178	0.956523915	0.925742981	0.875755971	0.833673633	0.760886631	0.720404359	1.044212722	0.55752997	0.496656913	0.381342214	0.277736306	0.184104194	0.104082652	0.003548817	-0.099612727	-0.189499059	-0.299588104	-0.386689858	-0.482672172	-0.550038159	-0.638109883	-0.713362291	-0.770984834	-0.822947263	-0.883987764	-0.918432662	-0.963815825	-0.984143944	-0.997256171	-1.000307466	-1.00109792	-0.970398921
-5.057866343	3.913548834	-3.408438964	-0.331720564	0.504455244	0.178407991	5.446335096	4.47344464	2.150116273	2.996705715	1.133738265	-1.569451606	-0.720675657	0.400978387	-0.270420615	3.208867805	-6.475005602	3.978391677	-6.572288185	-3.228765608	2.95813299	4.962183985	3.5236694	-0.93735169	-1.671842798	0.009635547	-4.295550746	1.443503286	-2.77026419	1.181135128	-4.818341599	0.19372028	0.853725805	-2.008786933	1.185947693	4.59895535	1.015319105	3.741745504	0.867482918	-2.159838143	1.786452171	-2.566320396	-6.6206974	4.704935688	1.817281537	2.05133341	-1.941568145	-2.327401732	1.774813695	-2.884307524
-0.737894753	-1.975522029	3.90120364	-1.389438088	0.695833958	-0.711177123	2.093122213	0.246876034	-1.23524764	3.421135001	-2.122555712	0.647296005	-0.414334068	-0.401597405	-0.944381278	1.831813348	2.485507861	1.547031034	-0.379051013	2.129021404	0.449560628	2.403534248	2.381013548	1.365130378	2.755165892	1.360238804	-1.418831509	-0.356305874	2.090418631	1.165577528	0.130388092	-1.041403745	1.315276184	0.131080528	-0.675700849	-3.393252556	-1.026343438	-0.603242228	1.481693509	-1.048122031	-1.016002049	0.595821199	1.32652903	-1.302150697	-1.598302535	0.265531115	-1.47808618	-0.050078891	-3.457860236	0.614999696
0.099981183	0.190692002	0.289502935	0.378862206	0.476166423	0.554953439	0.629161872	0.70599213	0.776845724	0.827634222	0.884928887	0.928087221	0.963140307	0.980355556	0.99733617	0.999657229	0.994132232	0.982528527	0.963664588	0.922668435	0.888416464	0.834622387	0.770906489	0.701564517	0.631204909	0.559835198	0.460392144	0.385882475	0.290660029	0.197586158	0.095232325	0.003544953	-0.085780465	-0.186201208	-0.287522211	-0.376937631	-0.467539253	-0.554819771	-0.627182265	-0.704904789	-0.772471322	-0.824255541	-0.874211203	-0.928270854	-0.952766465	-0.984820742	-0.986248553	-1.001106521	-0.993230431	-0.982957736
0.042270748	0.1695128	0.332738473	0.464409239	0.549154988	0.547606377	0.467254982	0.322835742	0.183069756	0.099556046	0.109007279	0.180905139	0.31848484	0.465487193	0.610139411	0.653473046	0.603138245	0.494203811	0.318798858	0.177826153	0.088316565	0.099270632	0.194944949	0.329197834	0.462367122	0.553320995	0.569617963	0.471146648	0.333368051	0.17730034	0.042525931	-0.000687656	-0.047866537	-0.166461741	-0.327452202	-0.46936192	-0.554633873	-0.54641596	-0.457961089	-0.329969612	-0.194697781	-0.103996686	-0.094381936	-0.174328537	-0.320020529	-0.476376566	-0.609704614	-0.642343824	-0.597529998	-0.488263469
0.188471506	0.377022813	0.524347058	0.632885337	0.685952137	0.714264474	0.706158953	0.711941599	0.699362297	0.723404191	0.767540487	0.829399595	0.881764758	0.953173508	0.98212761	1.016551463	1.00913323	0.962875048	0.905783461	0.829169081	0.778856696	0.732093039	0.707131503	0.722541522	0.719103094	0.720516651	0.693498685	0.626904789	0.525867335	0.39149696	0.201849533	-0.010063134	-0.191682974	-0.3699983	-0.509342954	-0.588063983	-0.665631221	-0.67850509	-0.67025278	-0.648969678	-0.657262812	-0.667170735	-0.69386017	-0.742932046	-0.802587899	-0.848681712	-0.890789237	-0.894210717	-0.890406429	-0.852839124
0.111205557	0.193315894	0.284397479	0.380209915	0.483230207	0.560954048	0.646915049	0.717620099	0.775292436	0.829083283	0.881479944	0.931324557	0.966713467	0.957330903	1.009333392	1.00784099	0.995019248	0.982352928	0.954283444	0.915751547	0.876385419	0.821155223	0.776190558	0.717775527	0.652892407	0.581873566	0.473155885	0.396275394	0.290964272	0.196616009	0.109729822	0.02027904	-0.094789688	-0.20134148	-0.28164322	-0.390431454	-0.464284505	-0.568885126	-0.62969016	-0.710016474	-0.761703955	-0.837522381	-0.872756664	-0.909429347	-0.957206952	-0.973262123	-1.00479469	-0.999791911	-0.989429674	-0.978146921
0.052999287	0.193719383	0.358061571	0.514590643	0.594596634	0.542264035	0.401693932	0.178546859	0.031486228	0.176395689	0.223311196	0.150964168	0.004186002	0.174696748	0.309934002	0.364251684	0.322296915	0.177573766	0.000396438	0.146515847	0.225797415	0.170239035	0.034643345	0.185481107	0.398152788	0.541773742	0.583193439	0.52352427	0.366336288	0.197452316	0.061011049	0.007077681	-0.051397183	-0.195897013	-0.369205366	-0.515068439	-0.585742337	-0.546044307	-0.400471698	-0.181667305	-0.02663683	-0.171643954	-0.216048098	-0.150516097	-0.008498494	-0.172858325	-0.312177663	-0.366073738	-0.319735802	-0.178987645
0.463083054	0.578288171	-0.626954869	0.491831613	0.534798803	0.630571924	0.476137583	0.447839308	0.241574947	1.089216219	0.844766816	1.108744614	0.682021224	-0.364403956	1.30319096	0.701649904	0.993250425	1.28177785	0.685366219	0.536427298	1.256536868	0.460129267	0.76911601	0.793919464	0.62056001	1.000925604	0.107196984	0.670991481	0.136891276	0.028830752	-0.253515505	0.440472403	-0.279573488	-0.009395293	0.064407441	-0.467367347	-0.346438738	0.014463113	-0.672873989	-0.659962608	-0.26378819	-1.071131856	-1.020307748	-0.277867059	-1.160488515	-0.88459024	-0.92993331	-1.137204525	-1.008873212	-0.306738243
0.097241236	0.195954264	0.288529624	0.378628331	0.472089059	0.548628868	0.631185717	0.707949357	0.770807292	0.829396328	0.880250783	0.919762417	0.969236714	0.988771718	0.995339223	0.98980627	0.994115028	0.978034362	0.9543125	0.920236341	0.886322479	0.827275264	0.775533229	0.704398465	0.639770502	0.559146626	0.467993943	0.385271858	0.289696226	0.202413212	0.101052596	0.002083626	-0.097031738	-0.194303468	-0.289078814	-0.39057392	-0.471057998	-0.555774908	-0.633210487	-0.705617185	-0.777673128	-0.828832229	-0.874211067	-0.928457047	-0.951505488	-0.981147691	-1.002819106	-1.000347966	-0.994685003	-0.978029807
0.097675111	0.194928676	0.292044094	0.385961971	0.480459098	0.55330478	0.629120836	0.713488017	0.770247971	0.833091255	0.883855816	0.923730842	0.956682361	0.979192782	0.986620389	1.005391886	0.993254077	0.986788263	0.952002036	0.927072584	0.881821512	0.84072675	0.770068713	0.711647767	0.634470189	0.561221612	0.470521359	0.384911152	0.293687346	0.198958474	0.101520406	0.012363569	-0.097942239	-0.196419106	-0.292210728	-0.376786407	-0.474861357	-0.559631874	-0.629877372	-0.700718525	-0.768733084	-0.829267332	-0.878503892	-0.927254673	-0.961422785	-0.979085558	-0.9949393	-1.000901057	-1.000781671	-0.975308427
0.093984976	0.194704728	0.302232045	0.373812049	0.478241971	0.554485239	0.631550921	0.708299831	0.781372195	0.842562232	0.900382221	0.938452572	0.960654778	1.004775235	1.020219952	1.026391074	1.035533466	1.008385173	0.964378188	0.943390638	0.919034084	0.846831023	0.805226263	0.722441015	0.660571486	0.573176214	0.487674445	0.407565853	0.308037727	0.200710874	0.100854239	-0.000983608	-0.092537111	-0.211845688	-0.295582562	-0.403148018	-0.503659841	-0.577754058	-0.64838552	-0.744134708	-0.806583193	-0.869907761	-0.931827104	-0.975138927	-1.011387358	-1.032543012	-1.050271103	-1.055194328	-1.058260229	-1.041043333
0.241644084	0.441207835	0.575632409	0.601139335	0.595764303	0.592530727	0.573987625	0.620317038	0.692035642	0.806268989	0.87329736	0.925685648	0.929941851	0.912524155	0.892073419	0.87811125	0.886082025	0.915912708	0.927813279	0.92320949	0.87452007	0.786711518	0.69662481	0.612594296	0.579002328	0.572865501	0.605308136	0.623438871	0.574153117	0.438316232	0.248636488	0.001460654	-0.250041491	-0.439214226	-0.573171264	-0.618760449	-0.610638219	-0.580581431	-0.57139004	-0.625134131	-0.680975355	-0.782948223	-0.876494027	-0.918655783	-0.946559802	-0.91248187	-0.886490569	-0.865671521	-0.886798867	-0.902814433
-1.851250981	0.104514267	-2.669235588	-3.316556107	2.12711449	-4.071167854	3.476950275	-1.616141103	3.891946423	-1.430930767	-1.736294159	4.783876406	6.850855839	3.611577264	2.488209252	1.868819768	-5.013104849	-0.396285021	-0.469391578	3.162569105	1.289105382	-2.090913419	-0.521893942	-1.945097652	-4.046476859	2.502176646	-4.718873519	-1.592135745	1.201874113	-0.791442461	-4.336753136	0.465466441	0.147076363	0.802834136	-2.21123614	-6.317740094	9.602392465	5.172863436	-3.672524761	-2.611081229	-4.014023131	-2.55582364	1.900397108	1.13197742	-0.949578055	2.403387775	2.700693799	3.853308964	-9.606941638	1.552574172
0.086907715	0.197500581	0.268910979	0.380476546	0.472696587	0.551715786	0.63810493	0.703336148	0.774335396	0.833497579	0.87474584	0.932427928	0.967263751	0.969692107	0.990128708	1.006754339	0.991540607	0.985750756	0.959168184	0.920342856	0.882702909	0.836583188	0.769067686	0.703699475	0.274329256	0.537922536	0.479108139	0.383183228	0.283781673	0.19374551	0.096585309	0.005344501	-0.097523942	-0.195588515	-0.30205152	-0.385519871	-0.473016342	-0.54219112	-0.626680347	-0.71092964	-0.767152785	-0.821626213	-0.886786949	-0.929993715	-0.949593146	-0.99072679	-0.989523024	-0.992658971	-0.992904698	-0.981759291
0.100547783	0.199589587	0.297716422	0.382547783	0.469407781	0.555764462	0.628991838	0.712397831	0.764540273	0.828182732	0.878882317	0.929709308	0.955880499	0.97414217	0.996321249	1.011824374	1.000949712	0.980529471	0.966939777	0.921665244	0.88046398	0.829708305	0.778106279	0.705179103	0.623521561	0.543303167	0.476934319	0.377265229	0.295283117	0.195693602	0.087864274	0.005667838	-0.099228462	-0.196039683	-0.288352049	-0.366845713	-0.475482977	-0.568561233	-0.616354801	-0.711964538	-0.763225146	-0.823129792	-0.878979144	-0.922027545	-0.948619246	-0.987609328	-1.003911647	-1.012697662	-0.991060626	-0.980335085
0.089880727	0.191089018	0.287229946	0.381823987	0.474465221	0.550059614	0.625811098	0.702637453	0.774144301	0.841160273	0.883217262	0.918817712	0.963411055	0.978862635	0.994245816	1.007207408	1.000169462	0.980744182	0.964147491	0.941080861	0.877828239	0.825852822	0.763354466	0.714785152	0.645955755	0.554579592	0.481970271	0.38094783	0.303770558	0.211644432	0.104640051	0.017486351	-0.102165181	-0.203825574	-0.280964016	-0.37960087	-0.467328158	-0.548873338	-0.642131918	-0.709264041	-0.77833705	-0.82953633	-0.885238629	-0.915769402	-0.955057543	-0.980064605	-0.996651896	-1.001538343	-0.971372064	-0.981440856
0.098326967	0.187583539	0.290152948	0.38039296	0.471099607	0.559789378	0.631523367	0.712186012	0.77126987	0.834150984	0.880542525	0.918867449	0.956995444	0.972281897	0.989339195	0.999030575	0.999173374	0.979313324	0.955099533	0.920817483	0.883627067	0.827894225	0.773333272	0.701132994	0.634723849	0.55387083	0.467555845	0.382288951	0.288005987	0.204389614	0.09563328	-0.001698887	-0.101337273	-0.195092614	-0.282968255	-0.387418305	-0.461923632	-0.552365841	-0.638262457	-0.711160074	-0.76957155	-0.830548136	-0.887313066	-0.925352908	-0.962604443	-0.969450255	-0.999048079	-0.997843651	-0.995212092	-0.977802553
0.186747949	0.337142971	0.472791492	0.569774292	0.629811647	0.679774723	0.694835709	0.704542615	0.733517251	0.7534801	0.793295788	0.847012265	0.915043979	0.958729452	0.994613497	1.005717823	1.016529326	0.973695312	0.926232272	0.87064189	0.799739482	0.772367593	0.745609476	0.724490878	0.708057166	0.701577605	0.632065068	0.580449546	0.470608891	0.3383939	0.164549272	0.017874767	-0.171573866	-0.327935614	-0.468686559	-0.54561481	-0.61521292	-0.654398553	-0.657404823	-0.675055829	-0.684023053	-0.695480009	-0.728813612	-0.777367886	-0.826720253	-0.874588271	-0.894597923	-0.912448632	-0.900475389	-0.868881221
0.031663015	0.124110364	0.254320399	0.375584796	0.482797992	0.50273683	0.476702643	0.42041223	0.375790482	0.35376316	0.404511046	0.481984294	0.600019327	0.73444951	0.823262202	0.848163583	0.820828374	0.724261881	0.593497826	0.482250728	0.388202402	0.35254923	0.381493547	0.425848241	0.476235131	0.502729269	0.465953192	0.393271781	0.265162126	0.133787967	0.038525068	0.015832462	-0.033727487	-0.123247014	-0.249749949	-0.373231641	-0.467048414	-0.50067746	-0.484398102	-0.419730492	-0.374798856	-0.366743216	-0.390439044	-0.484712567	-0.606456399	-0.72074967	-0.830686984	-0.867678948	-0.817085657	-0.73506109
0.095640462	0.200979795	0.298004543	0.371899435	0.471835596	0.554788039	0.633237081	0.705965222	0.772263102	0.828383549	0.87685364	0.928355274	0.957160532	0.987850016	0.99479524	0.999831096	0.994867646	0.981772933	0.956979185	0.923897483	0.876463898	0.82277405	0.768256416	0.698936555	0.633811392	0.567149874	0.480718607	0.394076001	0.298247774	0.196074901	0.107386871	0.001576617	-0.098279599	-0.188243693	-0.283602435	-0.379094232	-0.468596281	-0.548768684	-0.635152401	-0.700797028	-0.77673187	-0.832183502	-0.878302645	-0.923046194	-0.956423155	-0.96953608	-0.988034665	-1.007234811	-0.987516009	-0.985793918
0.107497485	0.212164948	0.299232235	0.381856935	0.473378575	0.573618416	0.660710543	0.716980035	0.792870872	0.857599497	0.895355225	0.937215917	0.978334004	1.004948309	1.028572925	1.034589117	1.029366408	1.013188173	0.973753139	0.947443618	0.925259592	0.87563829	0.821965549	0.759413771	0.650934205	0.578479879	0.521384294	0.408873764	0.313748648	0.202302864	0.082632108	0.002276555	-0.095451114	-0.193892938	-0.297153769	-0.414139998	-0.520360511	-0.579658023	-0.670785838	-0.757196591	-0.814224597	-0.878814882	-0.933269639	-0.991909923	-1.032892982	-1.054384863	-1.072679793	-1.10167744	-1.086698139	-1.071859333
0.079275862	0.202462831	0.301588911	0.38654429	0.454772943	0.566806469	0.63584462	0.706800592	0.765643625	0.836100598	0.87812966	0.928847594	0.96974168	0.977204879	0.995342585	0.999608888	1.007673939	0.973564637	0.962723691	0.933388373	0.877612291	0.840572695	0.77618364	0.708511382	0.646512788	0.551960683	0.473013169	0.389951955	0.301455107	0.198762072	0.110537886	0.01890131	-0.108714515	-0.195069341	-0.282884476	-0.362856438	-0.469464385	-0.558314201	-0.642387375	-0.702574379	-0.770744575	-0.833136624	-0.874738731	-0.913623895	-0.955592877	-0.989523624	-0.982808408	-0.992615904	-0.990511147	-0.986876403
0.087681487	0.20467038	0.295391435	0.379990265	0.471751382	0.553142937	0.639215238	0.7106768	0.774333854	0.842026065	0.878234891	0.932323768	0.956971908	0.994835632	1.002100708	0.999148786	0.988871315	0.967968746	0.955840919	0.912541281	0.878566364	0.827216828	0.780797843	0.70247472	0.872709398	0.551591353	0.45641564	0.372617524	0.292363328	0.197561808	0.096187855	0.007298477	-0.102395776	-0.20166018	-0.301852849	-0.380760758	-0.466412733	-0.566944992	-0.628704477	-0.710931667	-0.758726237	-0.833692638	-0.872442833	-0.917732019	-0.953958198	-0.981164086	-1.000264127	-0.990430447	-0.993166286	-0.987289055
0.031853463	0.123562523	0.249605383	0.371607136	0.452107695	0.496332689	0.483296017	0.431703303	0.391111299	0.374980548	0.409644641	0.493714073	0.610818835	0.743661538	0.838883867	0.873372391	0.831585842	0.736580546	0.607918495	0.506663625	0.415397121	0.378774775	0.390850501	0.438989063	0.48232047	0.502254587	0.456143967	0.376553031	0.249702028	0.128089895	0.035639335	-0.000749482	-0.035380864	-0.120208825	-0.249913233	-0.371904673	-0.471039023	-0.501556235	-0.476306752	-0.435455969	-0.39251233	-0.372734805	-0.412451308	-0.49097629	-0.623119216	-0.741071417	-0.832245981	-0.879911018	-0.838349514	-0.745722112
0.100287439	0.19209614	0.288075994	0.379557291	0.473322073	0.557484671	0.639121288	0.705604022	0.779760618	0.820471853	0.876383268	0.924415451	0.959142595	0.988363112	0.996577199	1.004347465	0.986521581	0.983166242	0.95246789	0.92200178	0.880380595	0.838825838	0.771051331	0.709008925	0.63371252	0.553556508	0.47117467	0.387134975	0.293355122	0.20037082	0.095796072	-0.002844773	-0.099341865	-0.194647503	-0.291045837	-0.383734856	-0.477462397	-0.553317201	-0.632114122	-0.719540761	-0.774141208	-0.832013865	-0.885482214	-0.918991726	-0.950297967	-0.989723039	-0.997188191	-1.009848558	-0.994075223	-0.975472545
0.112302915	0.196558582	0.2886693	0.385886655	0.473435708	0.553489891	0.638758112	0.704723178	0.778557413	0.836757136	0.887532617	0.924994904	0.950968244	1.001417046	1.005626857	1.002711837	0.994099782	0.975853352	0.961932706	0.943332597	0.88200701	0.844449989	0.776524865	0.69758688	0.632116911	0.546949207	0.473200885	0.38017901	0.284979067	0.214056162	0.109901248	-0.012540344	-0.109498084	-0.185508914	-0.295370792	-0.38082065	-0.469874153	-0.548652558	-0.627082267	-0.698221131	-0.75451591	-0.822890567	-0.872211162	-0.929424944	-0.956858379	-0.979522898	-1.007508554	-1.009347641	-0.981869273	-0.986041989
0.069077595	0.25644715	0.472826934	0.658010625	0.730399486	0.651984202	0.48442392	0.413704401	0.608124772	0.830433662	0.962656982	0.959950443	0.892362075	0.841315734	0.820050293	0.825437738	0.818771575	0.830505926	0.896285166	0.966582136	0.956083154	0.836975688	0.609452274	0.4126549	0.48055613	0.648068686	0.724325983	0.661275786	0.480615288	0.251676845	0.076408989	0.000719368	-0.07377929	-0.25071798	-0.463933431	-0.658839693	-0.736932286	-0.647573169	-0.488411045	-0.411773385	-0.596503917	-0.824052229	-0.956779012	-0.962216307	-0.896279836	-0.830464093	-0.823725322	-0.828475919	-0.831415004	-0.83762981
0.097313525	0.19220474	0.296771519	0.387354838	0.470808403	0.567243446	0.645833697	0.717484662	0.783872242	0.837348095	0.904781128	0.9475303	0.989885174	1.005235449	1.024440848	1.028110011	1.031647254	1.017601546	0.987133427	0.951532367	0.919625948	0.865606102	0.805753583	0.733333009	0.661168845	0.583954545	0.501595399	0.39604573	0.317209144	0.209118905	0.10998232	0.000789349	-0.099730946	-0.207894231	-0.307920981	-0.409605252	-0.505644088	-0.593978013	-0.67022614	-0.754806062	-0.82401656	-0.886184149	-0.948606666	-0.995167359	-1.032227061	-1.054425823	-1.071123238	-1.076805272	-1.07376721	-1.06091525
0.096758792	0.191424346	0.298677982	0.388125312	0.478865377	0.561791756	0.642421807	0.722012595	0.783251867	0.840730038	0.913522114	0.939047314	0.980382931	1.015178428	1.018483114	1.024587828	1.028761339	1.01197567	1.002549778	0.96031311	0.921561094	0.862412928	0.797174721	0.747016014	0.676508857	0.58818362	0.494332311	0.399454597	0.31787338	0.223604249	0.107135772	0.009051304	-0.108062768	-0.191713865	-0.318245223	-0.407002875	-0.497748443	-0.597182102	-0.676331933	-0.750968371	-0.831843206	-0.906431336	-0.956401259	-0.98054478	-1.041670188	-1.057641202	-1.085148828	-1.075850075	-1.066541943	-1.063545235
0.511905432	-1.037319717	0.525839094	0.139783968	1.911696657	-0.663494321	1.550251484	0.958333737	-0.23000007	1.344902328	2.010782444	-2.467545625	0.955426082	1.942031039	2.270178957	-1.36841375	-0.310514925	3.328090561	-4.014877558	0.599418171	1.960637007	2.448826108	-0.412468294	1.808077321	2.590050626	1.968467379	0.081289676	-1.785054566	2.070294821	4.267461246	-1.491310909	-1.134624863	-1.62406115	0.060311876	-2.138601385	-0.372955597	2.138281534	1.661394802	-0.43974893	-1.314059292	1.873015871	-1.118802887	1.214814127	-3.829781813	-3.27798879	-2.478992602	3.583528922	-0.489758177	1.028790612	-2.016593877
0.044314288	0.191174083	0.367126297	0.512668589	0.586337825	0.55066899	0.404236793	0.214432892	0.010637266	0.119275168	0.158928884	0.094857156	0.052212934	0.221073588	0.370308265	0.426305078	0.363267613	0.22077954	0.060095236	0.095715207	0.160955875	0.130028275	0.008995211	0.207760842	0.405466761	0.542732893	0.578356381	0.525768835	0.366657413	0.188654894	0.052007384	-0.002776885	-0.051481137	-0.18977554	-0.356486051	-0.512913286	-0.586185438	-0.555516287	-0.422797788	-0.211175656	-0.019802436	-0.120616301	-0.167733956	-0.101721614	-0.061487755	-0.229462901	-0.365445707	-0.417475294	-0.373126598	-0.233723701
0.092955399	0.194572185	0.293225554	0.392360726	0.461967641	0.56013428	0.639113813	0.701130316	0.774655536	0.834577736	0.876164893	0.921308929	0.964130974	0.993940604	0.984564719	1.009488734	1.001040589	0.970687723	0.957979231	0.936523085	0.889874073	0.827816276	0.776701699	0.735187627	0.924415059	0.568998096	0.485077612	0.380066099	0.300945429	0.196206451	0.09308372	-0.003562033	-0.083896958	-0.209292742	-0.280929184	-0.385170017	-0.473589616	-0.552945747	-0.633538409	-0.714887212	-0.77762327	-0.823566059	-0.880783569	-0.908325268	-0.960418844	-0.973938865	-0.998857455	-0.995594082	-0.98867151	-0.973473171
0.086749439	0.193266541	0.293382703	0.387267194	0.471898099	0.553765732	0.65287266	0.708283653	0.775847803	0.838449117	0.892221587	0.945609809	0.979252537	1.003357779	1.008592133	1.021690688	1.036110408	0.994243649	0.992676434	0.961781141	0.906923574	0.849184587	0.805032296	0.721427794	0.659588239	0.589801795	0.494578543	0.396722623	0.305182907	0.211887363	0.115024137	-0.009227414	-0.105908995	-0.213696252	-0.310209205	-0.413677077	-0.490266144	-0.589477709	-0.675957889	-0.745366155	-0.841845912	-0.875882072	-0.935943081	-0.988103885	-1.025591966	-1.057639131	-1.067019485	-1.081102859	-1.075980948	-1.068228227
0.095916522	0.189241425	0.295090991	0.390263763	0.477705455	0.556896481	0.621283138	0.711206645	0.769105481	0.8355792	0.884971359	0.928214048	0.960181529	0.984638241	0.993699867	0.993472074	0.993186215	0.981544143	0.965507406	0.925784681	0.875531532	0.834102863	0.7663694	0.710567344	0.636628055	0.559379635	0.472063629	0.382126408	0.284516502	0.200714393	0.09288619	0.0019403	-0.100671826	-0.191587899	-0.290091454	-0.381038242	-0.459868619	-0.553150755	-0.632711575	-0.701781417	-0.779975577	-0.823996302	-0.8745019	-0.921976666	-0.954520684	-0.979573938	-0.983712095	-1.006134436	-0.992740685	-0.977029717
0.244579306	0.446184974	0.578109699	0.606406935	0.611731539	0.579555214	0.582448669	0.616965543	0.710832534	0.794294263	0.86917757	0.913574517	0.925367089	0.909691006	0.88870044	0.878422455	0.871666304	0.932243272	0.940552168	0.933717202	0.878691147	0.782116264	0.699737031	0.621447866	0.587000345	0.57905802	0.606690707	0.619613407	0.576944084	0.448855864	0.245657893	-0.011636374	-0.254275167	-0.432195927	-0.578585617	-0.616949306	-0.595448448	-0.586225945	-0.576381448	-0.622430693	-0.682325426	-0.783157624	-0.866417837	-0.932277082	-0.940192107	-0.910971189	-0.883621286	-0.885821084	-0.885351133	-0.914634758
0.191821648	0.347299112	0.498746143	0.598503012	0.653743569	0.684230302	0.702719658	0.693870156	0.7183565	0.743464106	0.76764674	0.843147314	0.887777323	0.964959517	0.992792005	1.017529282	0.993471346	0.951993582	0.915312187	0.837710209	0.79038376	0.753939992	0.724055878	0.722050053	0.716143648	0.692943436	0.677300371	0.608048088	0.506107558	0.369490192	0.201751423	0.000666308	-0.172681922	-0.351700706	-0.480350861	-0.593541526	-0.644738191	-0.674879477	-0.665865623	-0.670963326	-0.668714391	-0.680017887	-0.703613813	-0.756539765	-0.798627536	-0.863484931	-0.910950038	-0.907308355	-0.901066442	-0.859294753
0.066396724	0.230070905	0.432513387	0.599207883	0.652110971	0.577655308	0.387118967	0.307468718	0.473735884	0.685774598	0.787791454	0.79277406	0.70253835	0.614813149	0.610824326	0.616345315	0.597885587	0.620528339	0.707932672	0.777602197	0.794804465	0.673597903	0.477420573	0.288819592	0.386834562	0.568356775	0.652940353	0.592637544	0.431451391	0.235134685	0.072465341	-0.005015346	-0.057855302	-0.217384244	-0.411673893	-0.59474153	-0.652862121	-0.581084974	-0.402644172	-0.305188954	-0.456040457	-0.668606178	-0.795353632	-0.78094423	-0.713020717	-0.637193186	-0.613882936	-0.599671282	-0.622556865	-0.624093427
0.093693392	0.191786584	0.295918873	0.384630846	0.474842773	0.558154466	0.647864754	0.715607316	0.782382546	0.854204394	0.896099375	0.935938002	0.968656438	0.994490828	1.019023289	1.016175298	1.018368862	1.006230379	0.984289381	0.947963016	0.905984236	0.852987597	0.794378707	0.736116291	0.646617802	0.578716173	0.499351719	0.412665476	0.291386306	0.218753426	0.101754218	-0.000738292	-0.108946006	-0.204645124	-0.301711713	-0.403872635	-0.485186915	-0.57910504	-0.652956378	-0.736788831	-0.807220677	-0.875162121	-0.921965152	-0.993054877	-1.000962288	-1.040351575	-1.040345236	-1.062760266	-1.039979171	-1.023971095
0.034046935	0.127010202	0.250259858	0.395504282	0.466760535	0.507080163	0.495547932	0.440032438	0.389951769	0.354538158	0.390322937	0.485506969	0.60210845	0.730716689	0.817695441	0.866274482	0.830388885	0.726162904	0.606986252	0.473535156	0.398560487	0.361101395	0.377912473	0.426660828	0.483925635	0.509247974	0.470581656	0.378169808	0.257980254	0.127951683	0.039627351	-0.009060071	-0.034549254	-0.123877275	-0.261698014	-0.387222282	-0.473816998	-0.510472358	-0.486838052	-0.435706877	-0.378453413	-0.359815721	-0.386689197	-0.472277682	-0.597500315	-0.729345206	-0.818132164	-0.868393897	-0.824071234	-0.727693248
0.108870587	0.195660676	0.30115682	0.375640668	0.475520348	0.56278102	0.639626559	0.712406362	0.776031376	0.832329926	0.869131011	0.92688491	0.949484941	0.986791682	0.998670702	1.002693732	0.988364415	0.988716662	0.944232152	0.925491472	0.886271215	0.826815308	0.775867522	0.705111483	0.373133351	0.55913302	0.464833296	0.379848489	0.284576803	0.193276179	0.103112923	0.005951781	-0.10987652	-0.200876537	-0.280122629	-0.376162013	-0.457322388	-0.553483584	-0.638855838	-0.709510396	-0.779186387	-0.840834708	-0.875390153	-0.931526431	-0.956814418	-0.985433259	-0.990108392	-0.995552766	-0.996932275	-0.983254083
0.231990309	0.430592549	0.584940476	0.682767134	0.730376157	0.746900727	0.735967389	0.703044865	0.677201051	0.693445364	0.71620093	0.791182045	0.866470359	0.932983251	0.981068476	1.000916268	0.984257932	0.931972172	0.872763039	0.797784071	0.747309354	0.695165837	0.701322982	0.711052524	0.738287876	0.755999691	0.751271255	0.692815488	0.606870289	0.424273662	0.217961658	0.00112656	-0.218277255	-0.421817042	-0.571070463	-0.656250272	-0.718643731	-0.707356849	-0.679183094	-0.653184605	-0.614038395	-0.639568978	-0.663172227	-0.717109988	-0.779612252	-0.837619892	-0.87878235	-0.910019078	-0.867691395	-0.835589464
0.092534281	0.195955725	0.29156748	0.381285703	0.470773702	0.559218116	0.633999063	0.696622173	0.767954627	0.828412093	0.881434347	0.923009628	0.960041355	0.993773455	0.983544769	1.000866204	0.982375004	0.990186168	0.956299201	0.923545464	0.885280433	0.828007803	0.774519274	0.700900868	0.64008248	0.558375396	0.471142371	0.379362091	0.295120934	0.19978942	0.093581568	-0.013388793	-0.100933878	-0.203002558	-0.299063421	-0.38170672	-0.476622984	-0.560339349	-0.637611707	-0.706203342	-0.772373074	-0.841602087	-0.881386336	-0.92243462	-0.951078583	-0.982123158	-0.996120501	-0.997217575	-0.992198911	-0.980000732
0.102731162	0.200763924	0.291823186	0.380901135	0.472989996	0.567227304	0.63646492	0.725560056	0.785781171	0.857161086	0.908002883	0.945986029	0.983131112	1.002841764	1.029881659	1.028915706	1.035400717	1.022737956	0.979505537	0.95833407	0.913001447	0.860713822	0.804363161	0.74642971	0.668467873	0.594587951	0.496757468	0.401490813	0.315462959	0.213993864	0.10909957	0.0084614	-0.090719284	-0.206181698	-0.309349625	-0.411491402	-0.500136626	-0.591215028	-0.676866137	-0.756187141	-0.822941766	-0.890091261	-0.954554387	-0.986538409	-1.027594989	-1.055905761	-1.07588773	-1.085897492	-1.079039389	-1.070504266
0.101131608	0.181147966	0.28502617	0.392334705	0.479001632	0.561386183	0.649205649	0.708625809	0.793212215	0.823622955	0.896371583	0.919359894	0.956587868	0.985083069	0.991217425	0.998380658	0.989776653	0.967404936	0.966937074	0.912724204	0.869890318	0.850743917	0.763776491	0.689931984	0.665769594	0.557440495	0.473500138	0.375333088	0.307450246	0.195796227	0.105999604	-0.004396708	-0.089168606	-0.177830604	-0.285754928	-0.371486041	-0.446802254	-0.537305494	-0.623551718	-0.707844298	-0.785090831	-0.830423328	-0.869855295	-0.926263057	-0.978264551	-0.97826229	-0.993204032	-1.004190296	-1.007260912	-0.969865758
0.091373062	0.202535458	0.293209553	0.380953422	0.465259527	0.551162518	0.629836352	0.70023693	0.783746476	0.839843857	0.893904445	0.926647082	0.959917768	0.969236952	0.991200002	0.996919974	0.99149224	0.987737565	0.960346667	0.916963128	0.874867612	0.833675409	0.756720271	0.71103094	0.886174928	0.559104192	0.480318914	0.385699149	0.300225947	0.194987338	0.09646326	0.005582166	-0.101019304	-0.193571657	-0.27728096	-0.398611182	-0.466462778	-0.56088121	-0.63428417	-0.715223327	-0.773030394	-0.812660219	-0.888718926	-0.934264806	-0.949251697	-0.980072822	-1.00100874	-1.001812496	-0.995710801	-0.991025245
0.182722325	0.33179618	0.475345213	0.59054517	0.657817306	0.684506663	0.6937037	0.720679204	0.718037126	0.749816396	0.77969419	0.85262255	0.911184002	0.963423399	0.994769521	1.019461848	1.006761373	0.969728566	0.908698467	0.861408283	0.802156758	0.763187276	0.728151719	0.732337816	0.715886998	0.704288894	0.656532659	0.588253336	0.506223486	0.358458399	0.186595612	0.006217478	-0.161785657	-0.343746475	-0.481029433	-0.556099585	-0.615276658	-0.650516233	-0.663149742	-0.663961224	-0.658490765	-0.682663823	-0.733646284	-0.76455552	-0.824979705	-0.873365415	-0.906543461	-0.915628283	-0.892633306	-0.854055352
0.058089903	0.223461205	0.426958625	0.602000642	0.660118462	0.569843994	0.402722068	0.317110488	0.494240415	0.703150748	0.810919469	0.814715527	0.734904312	0.649065226	0.637841537	0.635848396	0.638614556	0.652922204	0.73003029	0.805859499	0.820487459	0.715353692	0.493764623	0.320137772	0.404617988	0.577531728	0.657086655	0.59325935	0.436623868	0.242590937	0.070104255	-0.018300209	-0.053096767	-0.222231262	-0.435120103	-0.603261046	-0.667139117	-0.566412249	-0.409338504	-0.325389856	-0.47571397	-0.698740678	-0.831790975	-0.823661453	-0.731082359	-0.637059947	-0.630116773	-0.625085134	-0.634864972	-0.664502135
0.052009862	0.185622949	0.348323946	0.509211623	0.586535051	0.560470323	0.433096424	0.24538278	0.062198002	0.061748059	0.078453138	0.012392876	0.130474192	0.30077846	0.440903195	0.49754034	0.442570991	0.300764073	0.137413978	0.010939634	0.091313324	0.062666538	0.066822342	0.2403809	0.430646933	0.554782755	0.583461499	0.507317763	0.365654696	0.182690254	0.049962536	0.00456337	-0.050896131	-0.184702296	-0.349616535	-0.512886249	-0.579444155	-0.550568979	-0.428584306	-0.251493859	-0.067032328	-0.056597505	-0.092721597	-0.020304761	-0.131902288	-0.29910451	-0.427607415	-0.494635909	-0.437571146	-0.314306964
0.183748516	0.371393665	0.496332731	0.592644273	0.670675466	0.69463633	0.711310259	0.699154848	0.712246361	0.730897286	0.78328335	0.834897937	0.9065789	0.955393556	0.996802868	1.018168323	0.99898364	0.971733374	0.905810177	0.850441003	0.797602125	0.758041203	0.724685782	0.710649525	0.720774109	0.712913829	0.682591551	0.60423745	0.508556096	0.36054414	0.194083054	0.006869024	-0.188224618	-0.34794917	-0.482002989	-0.571422845	-0.641897892	-0.661253878	-0.660745889	-0.667163364	-0.667009455	-0.67894499	-0.704444007	-0.757270541	-0.815519035	-0.859680365	-0.895125058	-0.91296591	-0.8976544	-0.859995469
0.09628977	0.196996406	0.279370615	0.386072602	0.470378858	0.551086028	0.63114185	0.710582225	0.790520045	0.837212926	0.881000929	0.933985878	0.952143321	0.985877147	0.998813865	1.008313482	0.994990651	0.982077126	0.951311739	0.930423819	0.877230178	0.830368343	0.782841289	0.70966806	1.053837858	0.560799497	0.467727291	0.395843136	0.286427292	0.192343906	0.102739567	0.006321742	-0.099922656	-0.203672683	-0.28446277	-0.381117807	-0.480807131	-0.557274023	-0.628465775	-0.706437845	-0.774481771	-0.829996406	-0.892030797	-0.927801526	-0.968424997	-0.983564563	-1.001772239	-1.017740935	-0.993741303	-0.987231873
-11.71927634	-8.935358818	2.398079801	-1.934838578	6.147104421	-6.310032434	-4.412974936	1.479039847	1.977939638	-8.883621013	8.987259809	-2.497631134	-3.899048536	-1.333012103	1.218538616	3.960333414	5.238906059	-1.107179041	-5.432016106	6.785323277	8.382940871	-2.337063666	-6.966374421	-14.03244749	2.570086625	4.200405836	-3.845169668	-2.20055477	3.463435985	0.718049015	4.481935331	-3.437379909	-3.17725811	-8.012773375	1.809107755	1.269585135	-1.082897523	-4.091686318	1.001623144	-3.583415656	-9.427272623	-11.46180917	2.209150237	2.120045912	-1.309041298	7.454205379	-2.430513431	-1.057972085	-4.871405314	-1.51780111
0.164891933	0.335075653	0.447733746	0.51429613	0.559578733	0.570667507	0.612103288	0.668549815	0.736659372	0.815820065	0.884801335	0.93122516	0.948549985	0.936540753	0.937129255	0.932442039	0.927415902	0.944653433	0.954522975	0.938247376	0.89132043	0.816620446	0.737376096	0.672076415	0.615247209	0.590962415	0.555903898	0.51218469	0.444419843	0.333874923	0.179736399	-0.008980097	-0.182059189	-0.340413836	-0.447751226	-0.522343547	-0.554700185	-0.57974347	-0.611632474	-0.655832013	-0.738011859	-0.804145749	-0.878892291	-0.931042983	-0.939582583	-0.957318783	-0.934367645	-0.93332486	-0.935105352	-0.943164
0.088645008	0.211663454	0.301258268	0.383195596	0.483305862	0.569893902	0.625104817	0.706840448	0.763934139	0.829057443	0.891241263	0.923304321	0.940770146	0.983086018	0.985746342	0.998849373	0.994845309	0.991992058	0.950620143	0.948948713	0.87964107	0.849899009	0.775375629	0.702909997	0.630570202	0.552457831	0.473280699	0.381715468	0.291386558	0.192720513	0.093507729	0.001943282	-0.079043858	-0.201405803	-0.296795533	-0.381985693	-0.472288794	-0.549234423	-0.641236931	-0.70809522	-0.778099593	-0.831726576	-0.892591227	-0.923133564	-0.951867465	-0.973001676	-0.974428975	-1.001703346	-0.994568272	-0.999050365
0.09791373	0.195877967	0.288379317	0.383905229	0.468974694	0.557234874	0.628957461	0.699144434	0.778577849	0.824284609	0.888781701	0.918658281	0.965696442	0.982167784	1.000576941	1.005114053	0.996729555	0.98056116	0.959331235	0.93285043	0.881731466	0.825859685	0.768484479	0.701031236	0.635641915	0.557526415	0.469784956	0.392159067	0.297230303	0.19836026	0.102350642	-0.002892633	-0.091295951	-0.190684606	-0.286510596	-0.380056305	-0.476683253	-0.561505425	-0.636570797	-0.70114491	-0.765136401	-0.835025801	-0.873047832	-0.925351876	-0.961025089	-0.97160295	-0.99176662	-1.000292092	-1.000755999	-0.987012629
0.085297585	0.196605378	0.282109664	0.391505874	0.476820622	0.543742394	0.631983125	0.710021199	0.771293025	0.834653779	0.878193286	0.924518145	0.9500379	0.981195362	0.995275053	1.002874507	0.998752022	0.98042588	0.956665318	0.92095836	0.873199872	0.822796911	0.766001967	0.708624862	0.625329208	0.56768214	0.472022477	0.390450423	0.292815458	0.193127679	0.094098313	0.004446473	-0.098424084	-0.199643215	-0.282368625	-0.3816672	-0.465602469	-0.554340991	-0.628747395	-0.71073104	-0.771600753	-0.830538087	-0.874962687	-0.927555368	-0.956926597	-0.980689698	-0.996165607	-0.99898205	-0.994589669	-0.988446776
0.105062649	0.195790917	0.296225525	0.386522109	0.481934487	0.550711845	0.638903489	0.704234787	0.781326632	0.822932038	0.880309988	0.914964242	0.944870506	0.977273395	0.987338803	0.992754212	0.982826646	0.985328544	0.955877335	0.928483136	0.888753165	0.843074483	0.774816611	0.706752583	0.626600148	0.553725969	0.481248586	0.389154169	0.288535042	0.207856331	0.10069789	0.000125967	-0.099780552	-0.203314101	-0.298577961	-0.370483383	-0.473800208	-0.558889011	-0.64550152	-0.688951651	-0.769102209	-0.823625175	-0.876603029	-0.916957409	-0.954451825	-0.976513061	-0.98699033	-0.988459427	-0.991086987	-0.97750975
0.048878819	0.178258292	0.34937351	0.484203528	0.573866015	0.554795971	0.451982301	0.294463012	0.126759236	0.030188626	0.006038455	0.087691081	0.237463225	0.401814313	0.535196273	0.587065101	0.533051326	0.409919337	0.240773325	0.098459054	0.014146998	0.03238128	0.134186273	0.289944937	0.448762095	0.551874628	0.567814748	0.496171472	0.344894856	0.176968686	0.050594692	0.001751124	-0.044181867	-0.180249332	-0.341371398	-0.491287053	-0.571528727	-0.554784234	-0.449281479	-0.29584141	-0.139788007	-0.024258446	-0.010122039	-0.090779691	-0.234631135	-0.405830405	-0.529449124	-0.581471418	-0.533514446	-0.412156218
0.086640423	0.197870108	0.285375981	0.382802563	0.473419214	0.55138565	0.646366065	0.713974216	0.799164757	0.836054779	0.913182238	0.952726548	0.968459237	1.010329608	1.023742028	1.032185343	1.023175177	1.021776966	0.993120112	0.959127929	0.908323796	0.881583008	0.820494378	0.732395864	0.66361771	0.590405056	0.490009773	0.41261039	0.325588986	0.200727166	0.097615293	0.002998073	-0.083644665	-0.2126131	-0.316354677	-0.399844998	-0.502331215	-0.588540602	-0.68703651	-0.756256497	-0.825392045	-0.903733632	-0.944693982	-0.986878058	-1.016918287	-1.077932843	-1.089523251	-1.077963549	-1.080423796	-1.048320086
0.099058512	0.198547735	0.286100032	0.382567731	0.462263034	0.557278601	0.621091143	0.702626216	0.775617065	0.835486571	0.88008846	0.932259342	0.953715931	0.994501934	0.996350268	1.00070649	0.992570184	0.991689293	0.961372712	0.920909823	0.889176465	0.837052012	0.778270411	0.705075341	0.625657486	0.557540856	0.467125719	0.371865508	0.280723936	0.203391362	0.10770106	-0.001688248	-0.095357035	-0.195188308	-0.285314344	-0.366093592	-0.472098788	-0.555836593	-0.623512273	-0.709844344	-0.76523357	-0.830736233	-0.889264085	-0.926682068	-0.958270545	-0.992952835	-1.002548042	-0.989103659	-1.001500037	-0.973651882
0.094495557	0.173736299	0.283694687	0.375485548	0.469997501	0.56057694	0.626873835	0.70561853	0.77535738	0.815745103	0.878633551	0.926688671	0.949485672	0.97871603	0.983199431	0.999273381	0.99819642	0.981834026	0.951452929	0.943977792	0.878426153	0.823540047	0.772116494	0.707728261	0.619472726	0.562253248	0.474396141	0.391680584	0.295015372	0.187725612	0.105766291	0.007290433	-0.112390124	-0.183849795	-0.307971248	-0.378196126	-0.481462896	-0.555559463	-0.644138607	-0.707402469	-0.767501616	-0.827581721	-0.881958409	-0.928897325	-0.9644591	-0.982381427	-0.991107709	-0.995820706	-0.99739775	-0.98816999
0.104746627	0.198416657	0.288618158	0.374988925	0.474005027	0.54781499	0.629000076	0.724076245	0.773997029	0.829425534	0.889996489	0.928482679	0.955667712	0.979500087	1.005526771	1.008493577	0.997126933	0.985073373	0.949837527	0.930342391	0.880510075	0.836661903	0.777665684	0.69995413	0.849827715	0.557830954	0.478607686	0.391664187	0.303706194	0.195485044	0.100478114	0.000714179	-0.099849204	-0.201215632	-0.291331597	-0.383046177	-0.479718022	-0.564985039	-0.623392205	-0.699361228	-0.767618627	-0.832632451	-0.871865946	-0.921479758	-0.959352431	-0.989044492	-0.991882716	-0.999515607	-0.997423035	-0.973830258
0.044582631	0.168824613	0.318234367	0.45657497	0.541254216	0.54419473	0.465692539	0.341834217	0.213613105	0.137806476	0.137897687	0.22245015	0.356746741	0.520752813	0.641003367	0.69360016	0.636936362	0.532737588	0.370407655	0.218574428	0.138602852	0.132649944	0.220166793	0.34660504	0.467219615	0.537079747	0.542185988	0.473095604	0.325893087	0.163653339	0.043741462	-0.008306966	-0.045013317	-0.162025856	-0.319913655	-0.453965865	-0.562728319	-0.548146446	-0.461400819	-0.345547059	-0.217141333	-0.128635065	-0.139766957	-0.216312819	-0.357854841	-0.516677872	-0.63880505	-0.686768128	-0.642823838	-0.521822567
0.093740582	0.193814911	0.293999257	0.385107533	0.48331364	0.554129747	0.653697197	0.722654623	0.787226511	0.850196239	0.90215236	0.955232922	0.972528	1.009701957	1.019696294	1.047368632	1.03529228	0.993659056	0.996426766	0.956042226	0.902245711	0.862919739	0.810593299	0.737888531	0.649728266	0.581951061	0.50271123	0.394237502	0.312592419	0.211174564	0.117345154	0.005022028	-0.099994049	-0.203238023	-0.307421775	-0.412845214	-0.485696207	-0.578768793	-0.685180943	-0.758408457	-0.830018587	-0.891222396	-0.929575379	-0.994473981	-1.029650992	-1.047353909	-1.076009723	-1.082138099	-1.078687465	-1.066860206
0.100943717	0.190451027	0.287239087	0.369475152	0.472844956	0.563126334	0.634441568	0.706329675	0.769754587	0.833935986	0.879852227	0.919985136	0.956626385	0.978315668	1.007041953	0.994531244	0.995567615	0.980618685	0.967492151	0.927693796	0.886192483	0.828830663	0.772519628	0.703270922	0.639329052	0.55881171	0.469966343	0.393303465	0.289731129	0.194883064	0.086809265	-0.001249601	-0.109093094	-0.196450523	-0.287680715	-0.388959304	-0.455311289	-0.552134443	-0.630589631	-0.706407633	-0.77239597	-0.822266999	-0.875252817	-0.926877337	-0.955654413	-0.978996355	-0.989623218	-1.005087025	-0.987452567	-0.984482261
0.267255415	0.494191931	0.626700538	0.658136741	0.639212037	0.595652165	0.563151741	0.608567203	0.67110559	0.782534768	0.861223934	0.91454721	0.923520276	0.903604685	0.862945906	0.848519354	0.854732723	0.896190257	0.931513187	0.925828854	0.877025448	0.782386695	0.681192482	0.590063212	0.563279768	0.593467949	0.633133101	0.677032393	0.61885395	0.497820645	0.275344504	0.002943277	-0.261971263	-0.487997039	-0.62073033	-0.678814334	-0.625531041	-0.578218633	-0.570906552	-0.609068538	-0.674904549	-0.780585452	-0.880537752	-0.91734378	-0.927777653	-0.88453794	-0.868486429	-0.843555745	-0.864052847	-0.900718455
0.108308416	0.189944645	0.286874314	0.387563312	0.462671362	0.563405513	0.619630878	0.706393749	0.773083424	0.829029165	0.876130207	0.924588403	0.957860343	0.975791085	0.994518607	1.011230175	1.004041013	0.984398263	0.958834351	0.919475617	0.869930923	0.819399912	0.773794918	0.702386231	0.643312578	0.55284822	0.481852068	0.384487747	0.306702454	0.197400501	0.096561278	0.005694786	-0.086660584	-0.191244688	-0.282858114	-0.387603388	-0.475378542	-0.551179891	-0.63346181	-0.711540526	-0.78183045	-0.831730862	-0.885461682	-0.921288459	-0.95368004	-0.985263833	-0.997421028	-1.003256046	-0.988528069	-0.965343768
0.089254296	0.208256585	0.286504691	0.377463369	0.474097582	0.555737675	0.631854569	0.700814342	0.780292685	0.840670066	0.887695584	0.91830436	0.961949329	0.980603368	0.994945314	0.999310901	0.999080265	0.967938874	0.959067553	0.907719633	0.883388322	0.834025967	0.765733179	0.70885765	0.419620235	0.548607286	0.464007821	0.389377786	0.292728181	0.197064267	0.096362743	0.006170945	-0.093806716	-0.181143055	-0.301958947	-0.381977339	-0.471635464	-0.561722529	-0.635021333	-0.698132781	-0.768202485	-0.831469034	-0.882282322	-0.931971811	-0.958130088	-0.979470016	-1.004465802	-1.000099054	-0.997452867	-0.988559885
0.058063748	0.23860691	0.459062153	0.639268306	0.722026075	0.63153932	0.479747679	0.390308391	0.559108113	0.789603904	0.916477992	0.913002671	0.833704438	0.769456201	0.781216775	0.766738391	0.755927153	0.766082947	0.833806947	0.909307659	0.896364052	0.802504469	0.576360186	0.38394251	0.458637458	0.619741311	0.709833184	0.629482635	0.472501052	0.241739517	0.060764287	-0.017257039	-0.056574922	-0.231739161	-0.471100165	-0.646176701	-0.708338689	-0.639346668	-0.464803711	-0.372972383	-0.5729238	-0.80792356	-0.904515379	-0.914961743	-0.864767084	-0.767795358	-0.764550258	-0.778326479	-0.760345187	-0.800353887
0.167789565	0.345461098	0.470853358	0.580605853	0.643622894	0.673755486	0.696553728	0.705503064	0.724479164	0.740758758	0.794815652	0.861247685	0.911705097	0.963814615	0.997552908	1.019169569	0.99849819	0.97114811	0.935350714	0.870389066	0.81253972	0.755491445	0.735445004	0.727525828	0.725502329	0.700691462	0.65042409	0.576495937	0.484916011	0.344507791	0.17909517	0.00425909	-0.175272605	-0.342035768	-0.455899328	-0.556831966	-0.611358587	-0.646831085	-0.66044735	-0.669894913	-0.682044023	-0.696062786	-0.729971994	-0.759324583	-0.82339316	-0.877089092	-0.899433219	-0.904841791	-0.901134105	-0.866013376
0.096622032	0.202681365	0.298410844	0.389143304	0.471757551	0.569747	0.638397441	0.714751608	0.793936789	0.845623511	0.899819367	0.944848554	0.977822135	1.008329347	1.009559272	1.0205071	1.024200435	1.012099724	0.969727473	0.943288211	0.926419091	0.865654332	0.814886306	0.733137491	0.660956125	0.58002141	0.500371862	0.400412678	0.302741567	0.206565563	0.108873492	0.003248392	-0.095201949	-0.203973418	-0.314336369	-0.410327715	-0.504930342	-0.587707567	-0.686315367	-0.749337304	-0.816727717	-0.890537113	-0.942298647	-0.98701514	-1.039221689	-1.056417874	-1.069032948	-1.083195183	-1.06576362	-1.055201563
0.103610717	0.202541036	0.297897805	0.378039095	0.470065696	0.55656428	0.6467322	0.718104211	0.785233338	0.83756894	0.891024204	0.925907774	0.966903563	0.997237149	1.009586293	1.028882609	1.018518853	1.009687639	0.992546914	0.953789492	0.898556367	0.856140863	0.801397987	0.737403603	0.647389108	0.589973441	0.483603833	0.4055159	0.296766901	0.203013373	0.105855639	-0.002604211	-0.106916112	-0.207815454	-0.318505366	-0.40341807	-0.501081973	-0.594652354	-0.66697215	-0.752675885	-0.823292551	-0.889292115	-0.947532077	-0.989750364	-1.029708662	-1.064272159	-1.061341299	-1.08055464	-1.07346782	-1.062142837
0.103616154	0.200094956	0.29732594	0.382513479	0.478110122	0.557665779	0.641077827	0.709461648	0.787335304	0.832066275	0.881903887	0.924354613	0.972161878	0.970464397	0.998485913	1.009564877	0.985876492	0.976802588	0.964757546	0.930738179	0.875466302	0.831451499	0.786741942	0.70790867	1.020458786	0.566526455	0.470830373	0.374608642	0.296693854	0.194725943	0.091086623	0.002237467	-0.098987492	-0.18260348	-0.284993586	-0.3855444	-0.466687176	-0.560200404	-0.635354219	-0.709723411	-0.778691425	-0.849473129	-0.883764382	-0.91042865	-0.937810428	-0.990847745	-0.996380941	-0.988776872	-1.000917059	-0.983508209
0.1906992	0.356777871	0.469122764	0.537626895	0.563326671	0.578427425	0.596080455	0.645699149	0.726412236	0.799472067	0.882038878	0.934032703	0.933943485	0.937968211	0.935523296	0.916411158	0.928100788	0.950864842	0.946861959	0.933534163	0.872310076	0.819344402	0.724761974	0.651760284	0.600096753	0.57817142	0.557581543	0.533349829	0.458440163	0.363171978	0.201189217	-0.001502767	-0.183297943	-0.3626474	-0.475146932	-0.539621716	-0.562526721	-0.576658253	-0.604908617	-0.653506651	-0.728388957	-0.806926573	-0.885935442	-0.932877097	-0.939918089	-0.949569665	-0.921988709	-0.91912887	-0.924682938	-0.951727882
0.099422373	0.185446581	0.287645633	0.380397796	0.479988156	0.547744587	0.635452896	0.710048273	0.771327509	0.831193141	0.888737726	0.925639434	0.961266997	0.982867231	0.988026552	1.010430045	0.998267691	0.987017974	0.952575968	0.923095161	0.889039965	0.834098413	0.780235511	0.70498687	0.628090031	0.557112629	0.464937417	0.385270208	0.285803287	0.203835651	0.104006298	0.000991412	-0.106600568	-0.187673778	-0.291573193	-0.38588203	-0.472803797	-0.562718258	-0.635903152	-0.711782327	-0.782513258	-0.824615263	-0.884051499	-0.932239114	-0.959002307	-0.988303221	-1.000934705	-1.001935787	-0.996801874	-0.980585054
0.164208808	0.32386362	0.44761334	0.518643341	0.557668172	0.575399413	0.603923725	0.657012059	0.739158338	0.826482228	0.880720843	0.916291341	0.94153406	0.949126203	0.93111035	0.947662897	0.944211597	0.946023357	0.948594041	0.936552185	0.874032793	0.819497201	0.72186466	0.665604794	0.611040547	0.575617209	0.553259857	0.507560355	0.460185265	0.337487113	0.189426697	-0.003835051	-0.178996915	-0.325768577	-0.433953364	-0.517524347	-0.543186098	-0.577930798	-0.605171606	-0.677744125	-0.728440881	-0.807661233	-0.877493987	-0.925232242	-0.93541259	-0.941682608	-0.927761917	-0.920169038	-0.930381424	-0.95155368
0.090938853	0.196761892	0.291962102	0.383287859	0.471589349	0.557125351	0.643149659	0.711269749	0.763966831	0.821618221	0.886130307	0.918710583	0.958684644	0.983111886	0.985255668	0.997587742	1.00334211	0.983040277	0.959521427	0.931025379	0.884669363	0.832105669	0.763529039	0.701924259	0.639937948	0.55031322	0.470322307	0.380871533	0.293924195	0.20065638	0.095965094	0.013202634	-0.096886117	-0.187548139	-0.297759339	-0.378907361	-0.474949376	-0.560390873	-0.634413988	-0.710463683	-0.774897173	-0.832956094	-0.879432211	-0.923704891	-0.960610628	-0.975008613	-1.009793161	-0.982903569	-0.994754184	-0.98686843
0.088144502	0.191202364	0.294194755	0.38811689	0.47720237	0.569168692	0.646449392	0.7160398	0.787135899	0.855207684	0.903729367	0.950473862	0.990012744	1.009555576	1.017762169	1.031703509	1.021486439	1.005908361	0.987365358	0.962664419	0.914436548	0.880294423	0.803545303	0.741822368	0.661666725	0.586765285	0.488780608	0.405524663	0.313381111	0.210144489	0.102352803	-0.005993677	-0.10478511	-0.20810143	-0.314821455	-0.406825773	-0.502238762	-0.586952616	-0.680851081	-0.762775048	-0.837884899	-0.884652606	-0.951266734	-0.996775631	-1.029591579	-1.051350217	-1.076846086	-1.076516271	-1.06877643	-1.060742239
0.088773538	0.182305794	0.286347911	0.374238464	0.462808469	0.545979717	0.637484684	0.70059169	0.766388291	0.834435897	0.88084486	0.923747285	0.949293064	0.978230037	1.007482847	0.999517298	0.985747385	0.980934246	0.964336671	0.926747526	0.878144817	0.838507929	0.772576942	0.715030343	0.626675546	0.562085214	0.462224432	0.386160731	0.289181946	0.197995732	0.101969938	-0.004063916	-0.092682298	-0.195260345	-0.282662157	-0.380499169	-0.469088591	-0.554450083	-0.627720762	-0.712513797	-0.755307864	-0.828612922	-0.889177328	-0.934472117	-0.957385818	-0.975878025	-0.993139504	-1.010507069	-1.002346154	-0.982855486
0.065128008	0.253335816	0.497663536	0.685202346	0.762686152	0.688277446	0.504532914	0.447309072	0.643607348	0.872875576	1.007846162	1.027572594	0.965263634	0.904651408	0.896071785	0.903069855	0.891394525	0.90278579	0.963434912	1.022473013	1.02054621	0.890263023	0.644961347	0.451888386	0.515285111	0.68537774	0.755652574	0.678251731	0.507924881	0.262165998	0.083430195	-1.16E-05	-0.069419869	-0.260314306	-0.489110202	-0.683087867	-0.757813444	-0.691726245	-0.513441202	-0.442313108	-0.640013433	-0.881606313	-1.013947069	-1.024954411	-0.966467898	-0.909018679	-0.887116559	-0.902847814	-0.901116241	-0.904941394
0.094930283	0.195739279	0.287502617	0.384742405	0.477600621	0.553178404	0.630833394	0.708735444	0.785568723	0.835219702	0.882561532	0.931262747	0.947374689	0.985698503	0.994104958	0.99212672	1.006775213	0.981385081	0.952396998	0.917473662	0.882650755	0.839736905	0.773490738	0.704344814	0.638788889	0.554011862	0.467032229	0.379337747	0.278540874	0.188656884	0.092764799	-0.005760285	-0.093236363	-0.195509016	-0.285272977	-0.380534266	-0.468602221	-0.544873239	-0.62859036	-0.710350367	-0.773336875	-0.832004933	-0.890264478	-0.914330892	-0.952932457	-0.978429135	-0.991355869	-1.004073047	-0.999670983	-0.981163565
0.045586629	0.198220266	0.374503761	0.518094829	0.565834588	0.501256875	0.320456537	0.073829938	0.175314724	0.354617295	0.435684363	0.370184034	0.236878992	0.05431586	0.082391146	0.138595033	0.074296182	0.051245812	0.227131497	0.379632668	0.431113398	0.363620462	0.174733138	0.071576623	0.317513202	0.497374616	0.565037547	0.515921571	0.383399399	0.19908046	0.050067953	0.010314418	-0.055062663	-0.188693122	-0.36839095	-0.50988696	-0.572291044	-0.502553945	-0.326914135	-0.075330717	-0.17901714	-0.358233638	-0.435963338	-0.377043476	-0.231603252	-0.07156038	-0.083559728	-0.130280149	-0.092547333	-0.046249648
0.102784638	0.196839532	0.285708975	0.377185935	0.472440152	0.565524099	0.629585303	0.705417203	0.785261724	0.835924761	0.871615742	0.926879078	0.950768217	0.985998484	0.999409143	0.992449341	0.996541655	0.981409726	0.955289949	0.903634325	0.885096728	0.834887818	0.772978698	0.704484328	0.643353886	0.553941753	0.465156689	0.386525659	0.297246629	0.202760048	0.09146186	-0.007774024	-0.077863933	-0.192912969	-0.290329189	-0.38486436	-0.474872055	-0.553109118	-0.631547298	-0.698542968	-0.746698674	-0.825493019	-0.89516865	-0.915834304	-0.952369641	-0.978542279	-0.991199258	-0.996908545	-1.004648859	-0.973780495
0.098300337	0.195455017	0.289061545	0.381365238	0.48154837	0.541665871	0.6325372	0.712449313	0.778303685	0.825922362	0.876649934	0.923738258	0.961965905	0.982646584	0.992407949	0.99856752	0.992167226	0.987582909	0.957812268	0.923866631	0.883250829	0.827697319	0.772572232	0.717059439	0.638684624	0.560692094	0.457243396	0.384176874	0.284812423	0.201997367	0.099987947	0.004386849	-0.092721557	-0.193162555	-0.293243127	-0.375122013	-0.466570044	-0.550206519	-0.624520208	-0.699776893	-0.767223215	-0.831286888	-0.875390481	-0.931707986	-0.955348396	-0.974947832	-1.002000835	-0.999827768	-0.981268413	-0.986515296
0.105831527	0.202833968	0.294350722	0.386608371	0.474227125	0.562447025	0.630558489	0.718444855	0.780572449	0.844294116	0.903337043	0.948744693	0.987614159	1.017739802	1.025207009	1.028446759	1.028196057	1.019765879	0.995545526	0.951889493	0.920247431	0.868455326	0.808667729	0.732236411	0.667279403	0.585186696	0.485661042	0.400863906	0.311509087	0.213678602	0.089782376	-0.001568648	-0.106883503	-0.200987919	-0.309385646	-0.409158838	-0.510244108	-0.594710323	-0.68366218	-0.774091443	-0.838721706	-0.894279693	-0.963496276	-1.00115866	-1.042274644	-1.067447982	-1.096436665	-1.086976089	-1.09292183	-1.088770705
0.066068748	0.228536959	0.436332768	0.606359322	0.661351918	0.591899059	0.418252633	0.335474722	0.505146673	0.722596591	0.837919999	0.828167885	0.744313824	0.676783718	0.665886871	0.66513996	0.657548152	0.677004868	0.740677915	0.825260291	0.840616043	0.73497826	0.514080181	0.332901234	0.414096988	0.591532926	0.662223365	0.615979328	0.432885079	0.242570174	0.065705464	0.001749979	-0.073492894	-0.219459326	-0.435173073	-0.605448641	-0.66983946	-0.598966839	-0.416734531	-0.334024876	-0.508009732	-0.724857836	-0.8313568	-0.822974471	-0.757941593	-0.682713275	-0.667433497	-0.667000985	-0.656920605	-0.689268925
0.087989679	0.186619368	0.289494221	0.388607339	0.471245057	0.565225519	0.630764885	0.700957342	0.779492137	0.842799694	0.86132556	0.931302983	0.959896058	0.98558787	0.996193567	1.003462601	1.003471266	0.982884125	0.958068129	0.928543131	0.86703498	0.829205576	0.777315763	0.692597745	0.87166414	0.56033468	0.475189099	0.375137869	0.297768915	0.196073219	0.095331885	0.000566037	-0.096343202	-0.204811318	-0.295725322	-0.366507707	-0.468969263	-0.563560713	-0.627794079	-0.70938493	-0.778324485	-0.829613307	-0.887096434	-0.925059072	-0.95722701	-0.975513687	-0.99082838	-1.000435476	-0.997010843	-0.993830436
0.092362069	0.183175738	0.300431451	0.3788134	0.475614196	0.548933837	0.644457883	0.709331685	0.768887567	0.834540795	0.891987481	0.908877038	0.953779824	0.97965993	1.001011469	0.999728241	0.996388503	0.979573293	0.968555828	0.918479773	0.897964127	0.819043624	0.786233981	0.715265761	0.449161952	0.564030148	0.471952808	0.402218734	0.293055227	0.206223949	0.099800374	0.002572259	-0.10534646	-0.19024786	-0.286168652	-0.372688635	-0.468852566	-0.562627722	-0.619447219	-0.698956831	-0.786278947	-0.826207249	-0.878446208	-0.927227276	-0.956521821	-0.977120227	-0.996852561	-1.00608917	-0.993100168	-0.98366023
0.102942956	0.198405184	0.308184468	0.37980091	0.478076052	0.559121887	0.629665548	0.70584254	0.764667194	0.827107465	0.869476175	0.914562308	0.935838231	0.972674841	1.001717787	1.009938362	0.988810198	1.004837641	0.956153953	0.915886675	0.880126156	0.833374655	0.781024244	0.712467109	0.639429168	0.561586513	0.47814431	0.384894024	0.303413897	0.178529959	0.090822166	0.013631668	-0.088334881	-0.18843046	-0.281887069	-0.363533347	-0.478620304	-0.555258897	-0.619068972	-0.69081146	-0.757207442	-0.820991619	-0.88040508	-0.91335709	-0.971411832	-0.985991166	-0.987243597	-1.002070883	-0.993316796	-0.984861692
0.0986108	0.192379712	0.285288444	0.384196352	0.48083038	0.561768391	0.639952171	0.729014593	0.783118341	0.855093139	0.89628983	0.949598035	0.98035666	1.008509364	1.02427998	1.034052557	1.031102579	1.009445977	0.983673319	0.97384836	0.925224856	0.853229647	0.809959275	0.732753824	0.655580962	0.592849424	0.49387292	0.416935944	0.297307004	0.199244066	0.116633039	-0.002006607	-0.097675202	-0.206883262	-0.312696136	-0.399958019	-0.50586509	-0.60584173	-0.676481684	-0.752067053	-0.827504295	-0.889979348	-0.943982301	-0.977384732	-1.030370354	-1.065283187	-1.070034076	-1.08343046	-1.085607655	-1.056579402
0.1014864	0.201529939	0.289011567	0.391217441	0.479983152	0.553565778	0.640679959	0.716958435	0.764765044	0.824939252	0.874437047	0.917684481	0.960837579	0.977729021	0.996311156	1.016117876	0.996030146	0.986303938	0.954798754	0.927336033	0.874903488	0.835668743	0.763767331	0.700220239	0.627805229	0.562833535	0.468292875	0.380689617	0.293626551	0.19667079	0.094662819	-0.000493904	-0.097455838	-0.189285046	-0.279885292	-0.384098774	-0.460889704	-0.548170331	-0.636732497	-0.71397538	-0.765241598	-0.837499206	-0.894785308	-0.916009433	-0.949511637	-0.973971392	-1.001116968	-1.00696988	-0.998865522	-0.983635213
0.092967744	0.188377206	0.295970304	0.389518246	0.482332135	0.550731962	0.641684549	0.707402518	0.776754244	0.816630232	0.879533345	0.924358674	0.961779037	0.98305875	0.997091604	0.996245252	0.993251221	0.986343915	0.964914417	0.923676991	0.877721312	0.834313645	0.771313152	0.709998858	0.632147604	0.561560515	0.471688219	0.391083648	0.290768937	0.193506506	0.095749889	-0.000941213	-0.105567302	-0.196054579	-0.289406843	-0.385190241	-0.471714929	-0.559963104	-0.643033422	-0.701710618	-0.775148569	-0.828070604	-0.873611901	-0.912327029	-0.960600762	-0.981881939	-0.990625153	-0.999153503	-0.998438518	-0.976734792
0.0128412	0.075147952	0.156763085	0.255618105	0.327228307	0.394929098	0.450527898	0.483718266	0.534397285	0.575250016	0.648323637	0.728343951	0.825049748	0.896711253	0.955497976	0.987657573	0.958566032	0.901631298	0.82216158	0.73067887	0.654296417	0.589268002	0.533239907	0.488970833	0.445331979	0.396452917	0.319619467	0.239884153	0.15306288	0.071917914	0.020125128	0.002551797	-0.022630253	-0.082049788	-0.152170638	-0.241699643	-0.325727134	-0.397246983	-0.454468082	-0.491706842	-0.537079995	-0.589609929	-0.649605326	-0.736351713	-0.820304371	-0.902894373	-0.960705879	-0.978493115	-0.951697517	-0.910575885
0.112354623	0.19970139	0.281064078	0.392532571	0.469194641	0.549243386	0.637184328	0.718630284	0.78910529	0.844424038	0.900213042	0.95145917	0.992141803	1.006201258	1.017008592	1.03461711	1.031912058	1.015055845	0.994563866	0.956717869	0.915657942	0.875055907	0.803168104	0.746067614	0.678802818	0.579911362	0.481062232	0.403627553	0.313789904	0.194752209	0.102280317	0.006702605	-0.096732192	-0.208982582	-0.304805963	-0.399156217	-0.508091159	-0.596817653	-0.677829876	-0.74714395	-0.831739845	-0.898041684	-0.939062163	-0.999225276	-1.032949634	-1.060579754	-1.084444567	-1.082753563	-1.079992058	-1.048253969
0.085441474	0.192590239	0.29159827	0.406456908	0.46342008	0.58194094	0.639566346	0.72149335	0.774586224	0.846555415	0.902283262	0.938565	0.983229027	1.00119368	1.015613974	1.025702062	1.035829782	1.022133458	0.986061223	0.967584308	0.91794165	0.866362786	0.821808809	0.737167985	0.661586321	0.584749501	0.486972501	0.397662529	0.301268244	0.215799541	0.105883989	-0.007291877	-0.10454695	-0.220169727	-0.313663368	-0.394410762	-0.492048667	-0.590898658	-0.669279764	-0.750536646	-0.816906805	-0.88773003	-0.945215153	-0.992792645	-1.021166449	-1.057099525	-1.062515828	-1.092655266	-1.090778399	-1.056583418
0.020431359	0.075265236	0.166024403	0.260080745	0.345795369	0.407626801	0.458406592	0.483404545	0.528730301	0.574448743	0.634571905	0.718779047	0.807423048	0.896478395	0.95675032	0.970719197	0.952948074	0.901507599	0.810328768	0.711126677	0.637628593	0.569848985	0.524473239	0.483738724	0.454887449	0.408247443	0.341819805	0.257892612	0.168668343	0.076395035	0.029746329	-0.000200593	-0.024673954	-0.083046758	-0.158136581	-0.258364989	-0.347019197	-0.399763142	-0.466846911	-0.489801874	-0.522841062	-0.561365139	-0.635976943	-0.708125473	-0.805235757	-0.894631445	-0.959930187	-0.965177638	-0.960430644	-0.89359763
0.114635167	0.763176327	0.275454485	-0.408004514	-0.112836566	-0.181773241	2.278538135	1.530925705	1.428662603	3.309106404	1.911430366	0.881291768	1.386151577	1.129797211	1.265929081	1.074414262	0.841654713	-0.86365428	0.480957207	-0.427829276	0.085777732	1.167214097	-0.884014806	-0.208573992	0.351410698	0.551499174	1.055218489	2.058877031	-2.294123058	-1.341955221	0.005031649	-1.123023973	-1.592655123	0.341609642	0.326342367	-0.553056546	-1.854920549	-1.681008544	-0.696174878	-1.68827081	0.872564828	-1.056435755	-0.290600344	-1.332119091	0.887781711	-1.449447291	-1.044744889	-1.965405686	-1.641167218	-2.555976394
0.059035967	0.219164415	0.431007154	0.568582094	0.616664652	0.547639444	0.371666424	0.275846597	0.445799004	0.656942692	0.760865643	0.739826701	0.651517796	0.578924946	0.565435423	0.549903023	0.548508936	0.591010293	0.657627895	0.727624672	0.767010694	0.654682079	0.457220934	0.289324277	0.373878824	0.555870606	0.626921821	0.578014671	0.421420763	0.233568072	0.060554868	-0.001627119	-0.065882335	-0.224191364	-0.417515952	-0.571217349	-0.636338715	-0.555419529	-0.373455698	-0.277199834	-0.425529577	-0.667648287	-0.748722842	-0.741946254	-0.656448593	-0.58020517	-0.559398417	-0.546062307	-0.547396852	-0.560603828
0.104042631	0.19973049	0.294696611	0.365734552	0.474754689	0.543458528	0.626660638	0.7111283	0.784963253	0.834691932	0.884820838	0.924283603	0.95807379	0.977819513	0.990374739	0.993411676	0.994636099	0.973874693	0.942424105	0.926246467	0.871139673	0.835940816	0.782131861	0.70202568	0.633894107	0.560026567	0.487410759	0.38189435	0.282683571	0.197684897	0.101877331	0.003824975	-0.102947672	-0.221129475	-0.293051129	-0.381551163	-0.482058997	-0.543584403	-0.632614544	-0.706452694	-0.771837693	-0.815592869	-0.879046363	-0.925301933	-0.955440697	-0.987560622	-0.99145791	-0.99572123	-0.99869552	-0.984043268
0.106049735	0.190981019	0.283040988	0.387649288	0.478042849	0.544987352	0.627335655	0.71366144	0.769822532	0.827164464	0.882552589	0.914019162	0.951778975	0.986047701	1.001607051	0.997221825	0.998657972	0.97711814	0.951044155	0.925259967	0.88938228	0.835886235	0.779321671	0.702321594	0.628309673	0.566059346	0.472245028	0.387407049	0.290147574	0.192404025	0.109023097	-0.002790879	-0.095675109	-0.205022203	-0.288932208	-0.372533157	-0.452611972	-0.550940285	-0.644954824	-0.703988716	-0.767813455	-0.841863902	-0.881260864	-0.92800771	-0.954980712	-0.979762144	-0.994262773	-1.001869051	-0.993131272	-0.985469447
0.097864856	0.195513901	0.282090494	0.394710943	0.483858241	0.563094814	0.655583131	0.721666674	0.775406198	0.835960233	0.888200262	0.94347194	0.981368059	1.011757201	1.02840027	1.049132065	1.038743086	1.016098921	0.993633644	0.953315511	0.934541104	0.892777535	0.824677391	0.741201018	0.65097866	0.579691214	0.498273434	0.412729478	0.318136264	0.208050121	0.107687877	0.015886626	-0.109115974	-0.207597163	-0.310646983	-0.4036124	-0.502240004	-0.581161041	-0.680395264	-0.753526531	-0.818548308	-0.908898873	-0.953843415	-0.986478129	-1.025950736	-1.044075155	-1.066965913	-1.079040515	-1.051316696	-1.051262838
0.08770778	0.191769854	0.278162827	0.364228696	0.481715936	0.544197719	0.631762576	0.724250147	0.784977717	0.836087007	0.884334596	0.921697513	0.964846351	0.979236897	0.997201241	1.007608014	1.004775175	0.98413566	0.955047057	0.919300291	0.882457073	0.832882257	0.773911288	0.702251787	0.640245713	0.551597436	0.474864433	0.387154825	0.290942218	0.194986602	0.103206236	0.000485879	-0.089537364	-0.209998419	-0.293112509	-0.374897768	-0.478002368	-0.564432881	-0.651162117	-0.703013555	-0.779386743	-0.83288471	-0.886430855	-0.918097993	-0.963950518	-0.980190858	-0.997134398	-1.006359289	-0.993454594	-0.99516581
0.202453373	0.373698749	0.499155107	0.571087351	0.578686254	0.585396191	0.601856897	0.648587276	0.723856691	0.793740074	0.877431871	0.935968623	0.93864283	0.934903363	0.923105296	0.915623025	0.911085729	0.929443224	0.939810559	0.916523456	0.868251021	0.793347857	0.712089233	0.644254786	0.602750075	0.580514724	0.579044486	0.560664366	0.508342705	0.369921987	0.21217182	0.00635754	-0.20361119	-0.385353175	-0.490851291	-0.554897611	-0.586316853	-0.563622081	-0.59050645	-0.627250803	-0.713440891	-0.809512595	-0.888122392	-0.938244175	-0.945956133	-0.941740697	-0.917011983	-0.902045518	-0.900971252	-0.930479267
0.130017758	0.15387647	0.273148557	0.354719332	0.434003972	0.539042439	0.655590334	0.705694065	0.834522223	0.866976366	0.86184583	0.925126619	0.960651948	0.984110176	1.011799586	1.030463537	1.009325125	1.000541842	0.944720137	0.901517205	0.881618063	0.845046932	0.777713386	0.681016892	0.635706109	0.544169157	0.446013272	0.353045652	0.289457572	0.209586248	0.079343725	-0.003994178	-0.058286704	-0.210737901	-0.261765465	-0.337674535	-0.48144637	-0.549759896	-0.658280218	-0.693394169	-0.750904686	-0.845852132	-0.901990666	-0.924527046	-0.95047423	-0.992037457	-0.999191114	-1.051935171	-0.986060441	-0.966872711
0.098150753	0.205121825	0.288681521	0.379836753	0.489389131	0.565781763	0.637951876	0.713401581	0.766618719	0.849524004	0.908865967	0.95085802	0.974637477	1.009356503	1.032813658	1.023513829	1.028369749	1.015128071	0.99181131	0.960746245	0.89675325	0.872300004	0.822732987	0.734704677	0.674596984	0.586520471	0.5001197	0.417701102	0.295746175	0.219140486	0.097221233	-0.000357931	-0.113704296	-0.211890108	-0.312381399	-0.401483479	-0.495300277	-0.589303752	-0.673032412	-0.760628947	-0.818366522	-0.892336435	-0.933457301	-0.99467406	-1.030267162	-1.059110852	-1.069132127	-1.078716544	-1.076235496	-1.05995324
0.074987752	0.262474448	0.504830091	0.693440033	0.768740503	0.691743566	0.527372413	0.469978838	0.661202457	0.894588783	1.037019281	1.058888105	0.990335182	0.931631556	0.92721634	0.929544018	0.928359406	0.932341063	0.997788667	1.05298195	1.034516836	0.905019234	0.667575844	0.465847437	0.515840586	0.692842469	0.763134371	0.703151014	0.518526857	0.269122307	0.077957283	-0.001751272	-0.074550256	-0.260764008	-0.492974545	-0.695705657	-0.776100523	-0.698250366	-0.528795098	-0.463966433	-0.658517076	-0.897833204	-1.038203129	-1.050342602	-0.987423387	-0.937270007	-0.926165944	-0.940670686	-0.935500352	-0.930339688
0.237868669	0.456974779	0.576001622	0.631164747	0.593948591	0.583101125	0.593162741	0.623358834	0.700707552	0.796396561	0.880670068	0.923796133	0.937519728	0.908924646	0.880586821	0.87807442	0.882825789	0.903688	0.928080554	0.932153483	0.877172529	0.786398017	0.698120186	0.614530726	0.588046233	0.580392581	0.609001749	0.634206182	0.57672446	0.458824892	0.252663435	0.006623197	-0.254662254	-0.443734843	-0.569935647	-0.632229743	-0.615012763	-0.593435572	-0.571651149	-0.613412653	-0.698501094	-0.786082246	-0.87669618	-0.925976548	-0.93421919	-0.921816689	-0.875412922	-0.874083396	-0.885446581	-0.908659786
0.094335928	0.203728236	0.286562485	0.379333747	0.472253623	0.552372955	0.649539214	0.71589314	0.780534127	0.836572327	0.912534053	0.95863877	0.994781321	1.01311956	1.012187602	1.041667227	1.033741527	1.028085196	0.988351055	0.966648959	0.920894872	0.865305744	0.788979274	0.734121669	0.664830963	0.598658362	0.482546965	0.418680712	0.302355103	0.198274728	0.099348432	0.000308609	-0.083288643	-0.204219096	-0.305400466	-0.393126454	-0.505544242	-0.587490024	-0.674617061	-0.778063878	-0.826697966	-0.900669086	-0.955060581	-0.988665552	-1.037014364	-1.067210208	-1.072361883	-1.076293979	-1.087567031	-1.056709767
0.10346316	0.188232782	0.289866501	0.391224229	0.463028625	0.571113048	0.640525476	0.718088703	0.784526139	0.838478226	0.898051247	0.955891778	0.970923436	0.999602795	1.022928904	1.029380575	1.020258012	1.029846865	1.001833117	0.957981215	0.922041713	0.85717842	0.799223959	0.733644146	0.669131431	0.589461075	0.50642087	0.410866199	0.312648477	0.200906071	0.111136026	0.004964492	-0.100943619	-0.204245199	-0.317928606	-0.416600386	-0.501950024	-0.588928962	-0.681521155	-0.754494699	-0.829700398	-0.89539941	-0.940310134	-0.993380181	-1.030218238	-1.041672315	-1.06539318	-1.083144369	-1.086530011	-1.069135379
0.053730341	0.180486656	0.344106611	0.492915494	0.573933847	0.554734566	0.453697721	0.291052227	0.136401289	0.027438516	0.008898993	0.088793063	0.237261113	0.403677579	0.532340493	0.583186174	0.539784604	0.403583132	0.240420991	0.09426392	0.007048885	0.022262219	0.127044413	0.29121466	0.444814574	0.549552476	0.571572826	0.488007228	0.341983625	0.18456174	0.048388601	-0.005252106	-0.042711549	-0.176619418	-0.336912718	-0.486585124	-0.564841438	-0.556198367	-0.451081262	-0.293889015	-0.133994823	-0.029027365	-0.011744698	-0.086398256	-0.237237185	-0.398933371	-0.523322982	-0.585570718	-0.531817216	-0.41031874
0.08096699	0.249910246	0.468664851	0.628330072	0.710928794	0.624566982	0.444135335	0.37544374	0.550624644	0.778124679	0.895718946	0.887287046	0.815105544	0.745922365	0.771513309	0.759990107	0.748915579	0.759439593	0.822247429	0.898625941	0.888208914	0.781401346	0.565034593	0.360666219	0.443196734	0.620655982	0.692907822	0.65469472	0.47632154	0.261976135	0.077206372	-0.00224805	-0.053999211	-0.22693266	-0.441297595	-0.629408321	-0.702040048	-0.616696978	-0.445306754	-0.372736474	-0.550276036	-0.779814334	-0.902929678	-0.895003476	-0.823250054	-0.770483616	-0.752783634	-0.753509907	-0.749718334	-0.756793859
0.069778798	0.261895734	0.490320774	0.682794273	0.738906157	0.669183474	0.510181725	0.439244995	0.633792731	0.867952988	0.997496877	1.005507479	0.945874603	0.891491232	0.884271667	0.887101137	0.878372263	0.88634922	0.943689682	1.007901049	1.003134773	0.873038913	0.637573027	0.440639561	0.50331516	0.670237838	0.749219731	0.672357103	0.487863586	0.257026948	0.067958878	-0.002614823	-0.074391303	-0.247749124	-0.491344587	-0.684177642	-0.753859136	-0.680670605	-0.505773983	-0.436145355	-0.638416383	-0.862450945	-1.004108265	-0.997643421	-0.945836352	-0.892411823	-0.878001497	-0.88945337	-0.88018874	-0.884438928
0.195680917	0.371397584	0.483922916	0.55800526	0.566492646	0.572823099	0.598211371	0.645889177	0.710803523	0.815836863	0.876226923	0.921753119	0.946487665	0.930702286	0.924910726	0.922766824	0.914241447	0.936947492	0.954878011	0.929738437	0.880608	0.81858541	0.718049034	0.650780624	0.603235203	0.578414726	0.5696826	0.554470857	0.480963371	0.364029806	0.214750372	0.001361658	-0.204967661	-0.366243746	-0.48200222	-0.552966408	-0.562808025	-0.579232656	-0.594668756	-0.646795854	-0.71602339	-0.811249066	-0.880414292	-0.933164994	-0.950459869	-0.928095501	-0.919922558	-0.91703727	-0.927833951	-0.929329828
0.113331798	0.190396981	0.267597088	0.364976799	0.465561329	0.55100888	0.637858793	0.694893586	0.761724941	0.846109619	0.888707111	0.897434978	0.951358696	0.993259495	0.992118612	0.98246521	0.998545876	0.975091004	0.972208888	0.927173858	0.876648949	0.834707178	0.763977872	0.71968614	0.635193436	0.550769447	0.463973942	0.376734121	0.275145307	0.194009637	0.108037408	0.00799953	-0.105822503	-0.19569487	-0.273356576	-0.373503471	-0.470157393	-0.570252047	-0.638754666	-0.705163377	-0.763673509	-0.846364914	-0.889761805	-0.917700547	-0.95857316	-0.97486469	-0.98733873	-1.01462184	-0.989252913	-0.993000936
0.097357536	0.197770769	0.290198323	0.383040003	0.474073632	0.556823305	0.633764904	0.705651237	0.773023301	0.830669558	0.881757801	0.925394194	0.959077954	0.989112822	0.998034332	0.995788758	0.996078719	0.987062645	0.950056171	0.929566944	0.874566694	0.827865271	0.784447461	0.707153188	0.645935822	0.558295919	0.476875018	0.383243237	0.296085557	0.195683486	0.106172405	-0.001403124	-0.089583544	-0.191843057	-0.292043458	-0.376911816	-0.469296507	-0.550569032	-0.639493042	-0.703625979	-0.76457079	-0.835888755	-0.880172025	-0.922858454	-0.961496574	-0.983750447	-0.994046367	-0.989636675	-0.99743151	-0.984221977
0.07102648	0.243060627	0.459316308	0.629534914	0.691854881	0.628443841	0.446500339	0.366052479	0.5482108	0.768254075	0.88095721	0.886654451	0.811232559	0.749541625	0.725954708	0.739334705	0.73111299	0.754881179	0.817269784	0.885436833	0.885244445	0.768130047	0.552353914	0.370247683	0.43409752	0.602032204	0.695672895	0.633442456	0.463390517	0.242373161	0.068885155	-0.007293508	-0.057379725	-0.244330162	-0.451560012	-0.629742995	-0.687375178	-0.621522646	-0.442947331	-0.362848034	-0.545171954	-0.773051903	-0.87474296	-0.88362551	-0.81762596	-0.754865607	-0.724977814	-0.733711161	-0.723103394	-0.740774714
0.05501681	0.191115707	0.365796525	0.518184107	0.591656185	0.544490754	0.404763844	0.199455813	0.006363929	0.148761752	0.185016242	0.115656911	0.03031496	0.207860168	0.348863978	0.400866445	0.347524036	0.215922416	0.032593019	0.111252779	0.188446583	0.143972033	0.011133544	0.203068047	0.400032648	0.54660933	0.583771733	0.518684858	0.369897763	0.190254145	0.051899276	0.000213515	-0.047897432	-0.181145467	-0.361526423	-0.51573185	-0.588639622	-0.548374455	-0.404719618	-0.203140061	-0.004827978	-0.146659347	-0.184900383	-0.116668735	-0.029726038	-0.205573959	-0.340702962	-0.400424539	-0.350523019	-0.213395154
0.17659381	0.33363719	0.4828968	0.58781414	0.640866574	0.69015547	0.69383235	0.711504446	0.716883996	0.73810181	0.788427064	0.844568608	0.903078684	0.97005962	1.002041366	1.013701985	1.00796422	0.974816409	0.906641067	0.846109237	0.803766444	0.762974339	0.73774502	0.720154769	0.702640056	0.706839836	0.65432271	0.588868468	0.48072074	0.356491461	0.187538089	0.007618708	-0.187371264	-0.336002316	-0.477316941	-0.569970165	-0.624370106	-0.647375354	-0.646991082	-0.659876646	-0.670985381	-0.68089359	-0.715847226	-0.761926289	-0.821258511	-0.862059712	-0.899943654	-0.908728072	-0.892681094	-0.872049187
0.10335077	0.195267232	0.301490098	0.38128874	0.470691787	0.563086355	0.63804758	0.70135979	0.770549868	0.824370088	0.882468062	0.931407374	0.957127322	0.976840096	0.999293532	1.009814281	0.997156348	0.967330261	0.950670413	0.918018967	0.885878486	0.831648517	0.780261761	0.702154449	0.621202342	0.556890899	0.495517343	0.376634685	0.294657859	0.190520581	0.089445543	-0.005757671	-0.101346041	-0.195415768	-0.300284372	-0.373968512	-0.469054437	-0.547014565	-0.635124432	-0.72034383	-0.778341632	-0.847010975	-0.874751004	-0.910759293	-0.970776943	-0.981674797	-1.002180713	-0.991258678	-0.984818339	-0.999341972
0.107101072	0.198706475	0.286531952	0.38521001	0.477366866	0.556959076	0.628601962	0.710946833	0.770739896	0.828491231	0.887751783	0.927825349	0.951454441	0.97292061	0.987850105	0.994476199	0.999509101	0.976541136	0.953800462	0.931980615	0.873902132	0.820767842	0.780646086	0.704685446	1.055045331	0.562435515	0.486659065	0.388529794	0.297643626	0.197242982	0.099979389	0.002247176	-0.086227997	-0.203948795	-0.284324626	-0.376275903	-0.462938	-0.558674222	-0.627672528	-0.713261425	-0.771849183	-0.837032875	-0.882455094	-0.921059603	-0.955475173	-0.988012699	-1.001223733	-1.010163364	-0.993702699	-0.991198551
0.222026058	0.411806843	0.516886045	0.584732716	0.573795945	0.576731401	0.590332078	0.626392936	0.709716838	0.801167723	0.888951034	0.935395271	0.93339528	0.926376169	0.910374168	0.909326946	0.897463724	0.934796814	0.936898198	0.922085028	0.866027313	0.806308239	0.712652715	0.63170702	0.587208682	0.582165553	0.593304035	0.557462073	0.530403272	0.411324041	0.22678517	-0.008757742	-0.220987047	-0.395936229	-0.531797111	-0.571962699	-0.582923724	-0.57115361	-0.588613582	-0.644600355	-0.717864535	-0.798611906	-0.875552249	-0.927089131	-0.933923175	-0.937439675	-0.901023584	-0.903411128	-0.907935778	-0.934992879
0.097021132	0.196970627	0.293855037	0.389928919	0.475968301	0.555816474	0.618520202	0.700995036	0.776815263	0.832493902	0.89354755	0.927929449	0.96204314	0.977711819	0.991696709	1.002963174	0.993441716	0.978223017	0.949338593	0.913417164	0.880360569	0.829321574	0.775353138	0.715502862	0.624676531	0.56279738	0.460042812	0.369873296	0.298940286	0.191659777	0.096807702	-0.005970059	-0.105055899	-0.184141617	-0.297201957	-0.381476233	-0.460695653	-0.544358698	-0.633644611	-0.693513256	-0.778468759	-0.817939454	-0.872514827	-0.92197602	-0.961571956	-0.989414509	-0.98748627	-0.995133229	-1.002790942	-0.976505261
0.086310291	0.191762373	0.291543027	0.3752606	0.477974686	0.571348278	0.64280638	0.71614182	0.780323256	0.826879446	0.894604163	0.944490165	0.982597276	1.005192207	1.013764525	1.02557749	1.025287366	1.010801023	0.997743285	0.952504545	0.912130613	0.869724958	0.803164596	0.728215098	0.662579293	0.584465547	0.512933296	0.401417424	0.298950826	0.21893484	0.096979691	0.013197863	-0.10320752	-0.201259937	-0.308764816	-0.396624803	-0.505571607	-0.595864767	-0.676030747	-0.758023654	-0.821617884	-0.899274453	-0.944631777	-0.996538753	-1.025705345	-1.055023984	-1.077020683	-1.075318846	-1.07420589	-1.067411231
0.095990675	0.188741951	0.294133714	0.395417284	0.471564298	0.547738915	0.631689268	0.710240007	0.773521897	0.82160194	0.875264612	0.928029891	0.944359559	0.980599696	1.005207509	0.985821902	1.00468984	0.984483428	0.96646082	0.927204174	0.89690429	0.831611479	0.787985424	0.713592373	0.639086507	0.555318319	0.48059593	0.383525252	0.285220837	0.185967864	0.100997083	0.001988476	-0.095318769	-0.200190512	-0.273353948	-0.382895405	-0.469329953	-0.543880501	-0.629384034	-0.699087949	-0.775722265	-0.846621718	-0.872748628	-0.92506319	-0.962505287	-0.983250949	-0.99987554	-0.999767904	-0.999641274	-0.987422873
0.085462836	0.194599593	0.296719761	0.375606715	0.475046398	0.561833492	0.644622227	0.691429445	0.774021608	0.835813151	0.879387575	0.924110252	0.957335	0.987060539	1.008635762	1.003689762	0.99636186	0.987010583	0.961702656	0.928042197	0.881465467	0.8292368	0.779770432	0.708374394	0.355463685	0.547568092	0.479150723	0.380545782	0.286744849	0.185729375	0.092018332	0.007271389	-0.094544965	-0.196567767	-0.297971102	-0.380246653	-0.4769172	-0.551376996	-0.628620573	-0.705355614	-0.770785467	-0.825389028	-0.875196111	-0.91996622	-0.952594739	-0.986063799	-1.000977381	-1.005384536	-0.983198461	-0.977533268
0.033224401	0.119213849	0.244902753	0.370963917	0.458723569	0.492688476	0.474127105	0.437182925	0.395281898	0.386609687	0.414940381	0.501708999	0.620549556	0.73848449	0.838793084	0.881809848	0.852500329	0.755993253	0.627086746	0.501860301	0.422594882	0.382670362	0.391469779	0.437458266	0.478109679	0.488103005	0.457565415	0.380682833	0.252376398	0.125552262	0.035659359	-0.006073754	-0.023358168	-0.124659494	-0.245227074	-0.371258899	-0.449494836	-0.493344173	-0.488211032	-0.428654814	-0.394261573	-0.376477864	-0.421890068	-0.499886185	-0.620990359	-0.739311364	-0.852716938	-0.879152842	-0.846692339	-0.749562328
0.206725903	0.398092463	0.535677103	0.656859961	0.69647169	0.72122668	0.709565247	0.691347147	0.685731811	0.71079268	0.751764861	0.820978867	0.894448501	0.949765948	0.993628538	1.005169257	0.983020615	0.960885038	0.891932525	0.820014783	0.765805254	0.708788645	0.705655416	0.713466797	0.736183693	0.725425419	0.716442859	0.661728512	0.557414048	0.392928356	0.224482543	-0.011607903	-0.198546709	-0.393731821	-0.546532163	-0.62128479	-0.665093379	-0.681247824	-0.66632065	-0.663595334	-0.646738129	-0.668772823	-0.672341292	-0.736642931	-0.800670508	-0.855039423	-0.895035226	-0.905442769	-0.887827301	-0.836376182
0.104408652	0.197763416	0.28854213	0.379248636	0.474542307	0.558555275	0.645704019	0.699276963	0.769534552	0.832626992	0.878525496	0.927702114	0.961268937	0.983802517	0.996006649	1.00081585	0.997137323	0.978538276	0.96017279	0.915831407	0.874351023	0.832787464	0.77887105	0.708646416	0.641489448	0.559773791	0.474689134	0.379682537	0.2864423	0.197626286	0.098606951	-0.002218444	-0.088776708	-0.187816667	-0.290621063	-0.375762882	-0.469007851	-0.560304459	-0.627083592	-0.709330694	-0.764608091	-0.814051606	-0.876285242	-0.926405525	-0.95013598	-0.974960374	-0.994222136	-0.996425367	-1.00753634	-0.97765988
0.012483602	0.071146298	0.147133963	0.236562298	0.332184651	0.38921473	0.451637311	0.493917547	0.542853767	0.597783347	0.665343456	0.747744361	0.838901343	0.921477547	0.959528305	0.978942948	0.958657586	0.907416745	0.830249296	0.752057874	0.665647215	0.590310924	0.539978982	0.484884835	0.433564228	0.392108862	0.327944563	0.234679816	0.15472063	0.072385635	0.027841709	0.003105354	-0.008008257	-0.066899745	-0.15920288	-0.239099365	-0.320443083	-0.392581458	-0.442457274	-0.498946309	-0.534289608	-0.583786628	-0.653406803	-0.745305252	-0.831844988	-0.918035763	-0.957745787	-0.983594689	-0.968808336	-0.906974221
0.092887071	0.185857822	0.285687866	0.379209921	0.483867059	0.554704947	0.638553249	0.705415106	0.757322377	0.839815791	0.881530174	0.923394614	0.959585433	0.979103388	0.986805956	0.994883373	0.99896702	0.984086206	0.951643846	0.925422106	0.870644296	0.824891802	0.782845748	0.714477938	0.937381433	0.556959828	0.463474242	0.378286118	0.293648919	0.200652374	0.094085808	0.011485151	-0.088235938	-0.202423416	-0.289790797	-0.382010117	-0.471973804	-0.553498599	-0.631643962	-0.711956322	-0.766815375	-0.829415153	-0.887029677	-0.910419075	-0.965290295	-0.981097401	-0.992260889	-0.99564736	-0.992572739	-0.982882725
0.108258245	0.197910268	0.304507895	0.383214952	0.477937831	0.569868564	0.638231979	0.712778735	0.783472747	0.843527964	0.895830682	0.944703962	0.988643064	1.000069986	1.017598651	1.025426087	1.011555489	1.010751268	0.987754525	0.950457231	0.909676349	0.861274095	0.801550923	0.734636575	0.665541102	0.583245794	0.496541919	0.395287907	0.299796709	0.213593598	0.113500157	-0.000942582	-0.094279075	-0.201133984	-0.300404817	-0.394875337	-0.50176757	-0.600241368	-0.672239428	-0.765802618	-0.834984638	-0.894517128	-0.932849315	-0.978029437	-1.026111975	-1.053524024	-1.089394663	-1.08375233	-1.09580821	-1.064998196
0.10027242	0.180663426	0.290769764	0.374287061	0.471121962	0.556989243	0.641788672	0.709721994	0.777103301	0.823321579	0.880398314	0.927192715	0.955128186	0.982144984	0.997214513	0.996896069	0.988079365	0.985506341	0.970864865	0.927900579	0.893870197	0.829276679	0.764619133	0.700365138	0.623576338	0.566935258	0.4784271	0.379340089	0.293281325	0.198954209	0.096304605	0.017754268	-0.09895802	-0.194289161	-0.281089215	-0.392716235	-0.461559284	-0.55734904	-0.636721966	-0.700861985	-0.774469586	-0.830489134	-0.875744353	-0.910438311	-0.956830489	-0.984551531	-0.984303582	-1.002519891	-0.993120117	-0.989554258
-2.308076405	-3.713465907	-3.163608071	5.392688296	6.299096588	5.225047189	0.344609461	0.200227853	5.966323005	-1.877270424	1.740349761	-0.270905296	-0.070063477	0.750430826	-0.233861486	4.946753727	-0.117636369	-4.089999764	-7.449742569	7.832380303	-5.923487177	-0.953492908	-6.503309426	5.33880483	0.101951129	-2.326866943	-3.710865593	-2.79510279	2.029055627	-1.974805368	3.406629071	-2.76845421	-0.256903552	-7.7553386	-7.5054346	3.442412503	0.02271371	-4.01033414	1.873665839	-2.864869498	3.903984226	-6.875706414	1.338184784	-3.213022172	-8.046135361	-0.294288276	4.248264908	-0.904527667	4.190348986	5.6617569
0.091188455	0.207839268	0.280735257	0.394225552	0.479020196	0.550049866	0.650065498	0.714287608	0.76358267	0.834022814	0.878835627	0.92565768	0.937848484	0.975369249	0.994788922	0.980202319	0.988777199	0.975517349	0.952697219	0.921340902	0.886295069	0.821820997	0.75812989	0.701089973	1.06585542	0.56308856	0.463687383	0.379341113	0.274707274	0.189036138	0.092437437	0.012797626	-0.093257593	-0.193747448	-0.28377805	-0.385864817	-0.470322931	-0.553535169	-0.62880229	-0.708821579	-0.776962245	-0.83371382	-0.889697977	-0.917145626	-0.957946043	-0.984998137	-0.990511863	-1.004471444	-1.001166929	-0.986963135
0.101002353	0.201230218	0.301476099	0.381389474	0.487746377	0.563503147	0.649749962	0.726101453	0.791099971	0.840188978	0.906637275	0.944249802	0.969745804	0.998218929	1.027073367	1.056253781	1.031309559	1.021032402	0.994826592	0.945484367	0.929766327	0.866674425	0.803698768	0.747040161	0.672499864	0.588484546	0.498266097	0.419651836	0.310206147	0.206807815	0.091564192	-0.008446561	-0.092203489	-0.207404134	-0.300676031	-0.390257839	-0.48805806	-0.585708848	-0.677303025	-0.755313564	-0.822248064	-0.891778787	-0.942012243	-0.973431325	-1.038096816	-1.061795627	-1.070339736	-1.088040589	-1.075917678	-1.064448862
0.101217277	0.200361771	0.281232923	0.390019457	0.47726537	0.55532881	0.637030405	0.700506307	0.781007345	0.834951517	0.864683678	0.932380909	0.954759242	0.979605774	0.991697003	0.993052046	0.998370282	0.987447497	0.949346302	0.927518021	0.883259479	0.845024513	0.777395512	0.70110148	0.64135468	0.559109497	0.456608616	0.398844957	0.299539055	0.186715544	0.10630433	0.007141057	-0.085949554	-0.19445478	-0.297530573	-0.369727675	-0.461233587	-0.550346739	-0.640547369	-0.697517424	-0.774833355	-0.828805717	-0.881415419	-0.923009112	-0.958014134	-0.979359663	-0.995991173	-0.995343168	-0.99127563	-0.973720375
0.101919084	0.199556989	0.299752612	0.386992178	0.477180223	0.570944402	0.631120035	0.728632892	0.779213443	0.844550189	0.898824287	0.938483803	0.982104349	1.004550301	1.021875636	1.027063262	1.012337515	1.021528449	0.987677792	0.958633426	0.909237814	0.868322105	0.811452915	0.740207466	0.660621958	0.576054464	0.499267217	0.396567153	0.314969744	0.206335365	0.094330747	0.000919637	-0.103321918	-0.198478145	-0.302224746	-0.397912708	-0.501246185	-0.591623045	-0.680877301	-0.769510277	-0.847532953	-0.899666602	-0.96718661	-1.015039123	-1.0377052	-1.071517889	-1.094412265	-1.102372771	-1.095065002	-1.079751347
0.094963234	0.204063768	0.294001117	0.386588672	0.474903423	0.556516711	0.637798704	0.70985273	0.783935146	0.8363213	0.887933624	0.921373926	0.968046607	0.996808285	1.00414865	1.024507095	1.027816022	0.997435422	0.978131666	0.958890304	0.906699562	0.848049727	0.794881401	0.735011474	0.662389808	0.574852123	0.487808724	0.405245684	0.306210508	0.216157046	0.093493906	0.012233994	-0.102816058	-0.202814657	-0.302807415	-0.384478168	-0.503755241	-0.583820574	-0.676561551	-0.744737744	-0.801623199	-0.869501834	-0.942689803	-0.978161476	-1.013187036	-1.033208289	-1.061632483	-1.072083319	-1.077586381	-1.045975112
0.109171281	0.196505246	0.309890473	0.380540008	0.463859187	0.554746791	0.648145184	0.70665662	0.775830832	0.831680868	0.889542546	0.916513633	0.954869529	0.991925344	0.986270498	0.99249641	0.999816772	0.969440527	0.961422484	0.920291959	0.882944664	0.82815292	0.765972931	0.707567023	0.628235365	0.550963732	0.466378224	0.380678029	0.275715383	0.192663835	0.105262007	0.011063234	-0.097455625	-0.202422413	-0.285503197	-0.393181856	-0.480755385	-0.548873308	-0.637445648	-0.697045311	-0.776111681	-0.836938558	-0.887821419	-0.931191936	-0.956809028	-0.979298835	-0.994510888	-1.010512737	-0.989390183	-0.99561875
0.092429966	0.198151948	0.291219022	0.37643461	0.464226781	0.564709149	0.631059721	0.708166332	0.777206641	0.829167961	0.880528105	0.931226105	0.952629745	0.974527902	1.001812874	0.997862324	0.990497742	0.981862268	0.959226645	0.919046716	0.881976294	0.836503859	0.768954055	0.711868721	0.630997887	0.554263737	0.465392502	0.374822676	0.290960968	0.192696487	0.095506563	0.010329509	-0.104899483	-0.199095421	-0.286564294	-0.373981078	-0.461045891	-0.543364026	-0.638471284	-0.714507636	-0.769973646	-0.829348291	-0.878709102	-0.922218891	-0.960438146	-0.987013504	-0.993151728	-1.00193514	-1.003776419	-0.979267794
0.098234729	0.185482932	0.298600654	0.390308536	0.467577409	0.569034915	0.624803901	0.724965962	0.787775817	0.844445325	0.907538221	0.944363449	0.97657047	1.013134536	1.017699969	1.020832397	1.020839229	0.996779198	1.005962108	0.958663083	0.904558171	0.861481618	0.806434885	0.728799651	0.636632706	0.564652003	0.506990833	0.409527565	0.302034232	0.214577834	0.092040254	0.019923813	-0.084209306	-0.219526832	-0.294287853	-0.406781903	-0.502440444	-0.591273617	-0.655089183	-0.755972808	-0.823864313	-0.90392528	-0.951349586	-0.993512039	-1.025523228	-1.057809036	-1.092424671	-1.07864098	-1.083319711	-1.06596792
0.095937669	0.198225336	0.300488168	0.382552377	0.465656743	0.559621863	0.632521329	0.687263615	0.767275873	0.82906008	0.885906835	0.921567112	0.952109277	0.970130882	0.997598209	0.994502742	1.001124978	0.974441519	0.953405477	0.920230278	0.874623203	0.837934049	0.773295239	0.699611214	0.434097627	0.554720238	0.484823161	0.386936103	0.28540575	0.20901228	0.098557457	0.013433726	-0.090423015	-0.199893307	-0.297468568	-0.392979098	-0.463409958	-0.550848321	-0.621370641	-0.690796475	-0.767062224	-0.834665809	-0.892770399	-0.916107914	-0.96555095	-0.968152017	-0.998226926	-1.011927563	-0.998315756	-0.988567655
0.094774172	0.198884644	0.292834378	0.384008704	0.477655251	0.561099826	0.64738806	0.703969083	0.762920861	0.82653008	0.8889626	0.9238537	0.960149686	0.983350656	0.993395575	0.996271929	0.985876672	0.983957999	0.952319069	0.917127124	0.880555555	0.835809089	0.781242838	0.707939513	0.628902768	0.554096353	0.462814664	0.390205252	0.290411773	0.191970931	0.092961303	-0.001717525	-0.099418228	-0.195230802	-0.289828557	-0.381338985	-0.468423502	-0.563582318	-0.6410601	-0.703504406	-0.770760266	-0.828466984	-0.875196714	-0.918936191	-0.963137494	-0.981753798	-0.993629533	-0.998367019	-0.995208059	-0.981133017
0.048426981	0.211785827	0.405490604	0.566276142	0.631386251	0.547557331	0.37331981	0.270458804	0.431356554	0.63585806	0.737578596	0.717811958	0.646117558	0.551419167	0.526404012	0.523762383	0.518975041	0.562180108	0.63069841	0.726747647	0.748526345	0.626612452	0.452987325	0.279868768	0.363455062	0.54763723	0.633550129	0.554773758	0.418201046	0.223488124	0.064448494	0.001457912	-0.058445841	-0.221956168	-0.412052815	-0.565696894	-0.618004843	-0.538051142	-0.376033268	-0.266037932	-0.428628153	-0.637168454	-0.728107435	-0.720905264	-0.644480077	-0.553776347	-0.518038634	-0.531075569	-0.519285654	-0.571381752
0.098699701	0.194100877	0.282082829	0.379697431	0.473381654	0.549214103	0.634025182	0.702418066	0.776090514	0.839565892	0.881346492	0.912818902	0.96816107	0.980033411	0.995926589	0.997503214	0.999396423	0.980950027	0.95589032	0.926577147	0.88765619	0.821239558	0.769744323	0.702427782	0.637527124	0.547926572	0.476085245	0.383092084	0.286709943	0.201071171	0.105010255	0.01116073	-0.094689252	-0.196935539	-0.301486187	-0.377713613	-0.477047434	-0.559570369	-0.631068349	-0.70027729	-0.769973693	-0.828349374	-0.880021371	-0.917216603	-0.959569975	-0.988651441	-0.995623686	-1.003468809	-0.995822093	-0.980173877
0.09979528	0.199099287	0.289192254	0.381007481	0.478244938	0.554911332	0.622861041	0.708227508	0.761726406	0.829969462	0.886849561	0.932016363	0.951218541	0.981199131	0.993896998	0.991704585	0.993114612	0.978002975	0.95703128	0.916887171	0.886006092	0.830527661	0.778274036	0.714820155	0.628443505	0.555996938	0.470553752	0.38545019	0.295423279	0.194816171	0.097058458	0.003112921	-0.103715929	-0.189172062	-0.284642675	-0.377906488	-0.471850563	-0.54481813	-0.639004533	-0.706172346	-0.772200964	-0.8295738	-0.874129098	-0.92287247	-0.966742691	-0.981950213	-0.99781587	-1.00792852	-0.994974912	-0.983935582
0.100439092	0.200075265	0.290332389	0.374032838	0.468958697	0.556571271	0.636498409	0.712162357	0.763678874	0.834409669	0.882726468	0.92193226	0.963225378	0.974282385	0.988798997	0.992958273	0.998903043	0.985910532	0.973248444	0.914867277	0.896002908	0.825627616	0.782930683	0.704848727	1.133612412	0.546376498	0.470214772	0.379634792	0.291516729	0.196907319	0.100176173	-0.012230048	-0.09560039	-0.196188038	-0.286561887	-0.378729052	-0.481814751	-0.555340488	-0.638096872	-0.691131166	-0.763704536	-0.832588903	-0.869504337	-0.933158894	-0.957597212	-0.981451172	-0.992833617	-0.980739921	-0.99333015	-0.96797285
0.09223977	0.194539072	0.290150564	0.377510306	0.472328336	0.554682146	0.637286465	0.701321341	0.772118608	0.835455892	0.873248802	0.924027229	0.953042742	0.979742854	0.999698041	1.005688771	1.006053973	0.974869052	0.955787773	0.929824067	0.881008154	0.838954076	0.76790432	0.708546483	0.633232512	0.558385893	0.47404369	0.38578438	0.293932394	0.204703753	0.105927898	0.001831198	-0.091616464	-0.195290964	-0.28273997	-0.376637787	-0.472153996	-0.549769778	-0.636225142	-0.71009836	-0.774866693	-0.827896848	-0.880653073	-0.920767472	-0.960933538	-0.983343587	-1.000193704	-0.995273511	-0.996638492	-0.982470714
0.242405712	0.440401404	0.554666124	0.614986584	0.602208977	0.576035941	0.579637418	0.623885737	0.70479147	0.789240556	0.877161857	0.933129058	0.92495273	0.913421403	0.886323485	0.867541571	0.896918215	0.912580793	0.940620418	0.915729586	0.890574435	0.804280895	0.698771928	0.622133539	0.581677792	0.569903667	0.606316801	0.599425827	0.550509211	0.447593803	0.25101765	0.009947728	-0.241264592	-0.430920848	-0.562823356	-0.610785751	-0.605414604	-0.593464405	-0.59363815	-0.619366054	-0.701590981	-0.788572397	-0.86824664	-0.940495673	-0.933520304	-0.917194503	-0.888295914	-0.885698779	-0.885831004	-0.920023659
0.053283313	0.195181098	0.374968627	0.520300667	0.581768964	0.526970934	0.356044295	0.127139138	0.111202364	0.272687679	0.330761164	0.275688233	0.128662975	0.052477904	0.192979638	0.241719532	0.196366434	0.049404802	0.125492235	0.275209149	0.330607947	0.283001319	0.115752095	0.120762957	0.351544535	0.522797174	0.582555882	0.52092279	0.377542027	0.199858928	0.05728551	0.002495128	-0.050507908	-0.187227703	-0.370310014	-0.51827036	-0.577366038	-0.528546734	-0.35775788	-0.123590881	-0.107370715	-0.271306767	-0.334423337	-0.277625229	-0.129512536	-0.048245663	-0.190922219	-0.249485227	-0.19500794	-0.05905322
0.108174009	0.193130411	0.294368399	0.376936442	0.467484981	0.546367736	0.638861225	0.688483156	0.778775415	0.840720539	0.878943993	0.929443709	0.959647788	0.989797366	0.995560304	0.988434919	1.012605431	0.977422873	0.957383604	0.909807878	0.875775126	0.828083597	0.776091301	0.702165247	0.484949559	0.559058977	0.480143453	0.377936859	0.293714436	0.19466857	0.098670273	0.002012757	-0.105300811	-0.205985507	-0.286063077	-0.378736208	-0.471606211	-0.558193556	-0.638467148	-0.69836229	-0.784017302	-0.829536406	-0.880457904	-0.925030195	-0.956842893	-0.972174908	-0.9823201	-0.99250314	-0.995639141	-0.973801772
0.102989813	0.203671369	0.29837989	0.384648692	0.450880985	0.542182653	0.637838429	0.727316494	0.785467876	0.860456507	0.918783762	0.947491812	0.983722687	1.009164882	1.019010997	1.027945242	1.03292813	1.015875461	0.985077861	0.959364257	0.922640562	0.867067291	0.798196606	0.732035786	0.682429736	0.583566941	0.489371581	0.396125749	0.303089486	0.204232893	0.117827239	-0.010594969	-0.105486596	-0.219120294	-0.311297531	-0.386412014	-0.508858157	-0.566919046	-0.682700177	-0.753611557	-0.817365487	-0.897050967	-0.933737263	-0.989204621	-1.036594533	-1.083903868	-1.099481936	-1.075365387	-1.071102416	-1.035668069
0.05151163	0.194140863	0.370593292	0.518665892	0.585297963	0.53481876	0.380677882	0.150419728	0.064612096	0.225992206	0.272097709	0.208806569	0.065229099	0.11506779	0.253192876	0.315190225	0.254537247	0.117518062	0.054595631	0.208168596	0.276658343	0.226482271	0.07403256	0.159265347	0.371592053	0.534127948	0.586571971	0.522954259	0.369285242	0.193817167	0.055681488	-0.000299071	-0.049967856	-0.19829534	-0.369016418	-0.518084067	-0.586906085	-0.53444417	-0.387292333	-0.161915947	-0.06514292	-0.215966156	-0.278039082	-0.21165654	-0.063209394	-0.11641437	-0.256574428	-0.309430092	-0.262943497	-0.122224725
0.101410439	0.182043513	0.300906323	0.393822272	0.463969858	0.550199994	0.640272405	0.697482255	0.772848197	0.837710161	0.867997643	0.929589926	0.961847859	0.975816991	1.005608702	0.990910916	0.983701308	0.970119562	0.959416965	0.937919557	0.882070358	0.833373926	0.770435145	0.708056157	0.246680023	0.569174925	0.467375138	0.380182297	0.295864881	0.197124363	0.095007137	0.001561729	-0.080804105	-0.190158145	-0.298678266	-0.386103568	-0.470108415	-0.545680305	-0.639514343	-0.707105632	-0.775476091	-0.814026085	-0.885085269	-0.915299642	-0.957595398	-0.966747858	-0.991410762	-0.987996809	-1.001260198	-0.98571276
0.110210325	0.177037003	0.287712668	0.372453154	0.460300816	0.551613333	0.634105253	0.683972781	0.766969144	0.838415659	0.877104358	0.939804184	0.952959744	0.976062886	1.012072428	1.006242719	1.006836267	0.972602952	0.948723086	0.935448132	0.875533854	0.831884561	0.766851009	0.700121863	0.629742375	0.546091967	0.477000209	0.37915498	0.29852931	0.190373052	0.097837469	0.01854128	-0.10377104	-0.18094479	-0.2848114	-0.389855869	-0.468840338	-0.556718079	-0.622495185	-0.69633598	-0.75236549	-0.829981508	-0.885353792	-0.91200626	-0.951446055	-0.984455795	-1.008140088	-0.995897375	-1.010114188	-0.987874257
0.090649894	0.191357362	0.29099673	0.388217076	0.470941165	0.560207934	0.634366613	0.714649207	0.770501471	0.846746296	0.885573396	0.929478619	0.94805263	0.995435177	0.985869667	0.99231962	0.994925138	0.989149842	0.974302426	0.927677541	0.868879882	0.827387107	0.777447599	0.71675552	0.636864703	0.560428754	0.469998771	0.382069648	0.294345157	0.197621947	0.095492721	0.013795957	-0.08834752	-0.208918926	-0.286606956	-0.3919722	-0.479298466	-0.542105386	-0.646863446	-0.696871745	-0.782433707	-0.830298395	-0.890383489	-0.915549591	-0.949677397	-0.977068483	-0.994016974	-1.001267073	-0.995112573	-0.979145628
0.093536323	0.203414027	0.300283255	0.380326823	0.475513271	0.559365607	0.643514771	0.720179194	0.782279053	0.84142704	0.896054537	0.938673362	0.978519899	0.997318253	1.021818028	1.021407378	1.010023543	0.998661715	0.972404085	0.946042189	0.906628314	0.856270372	0.792103635	0.714956913	0.65397577	0.574119328	0.483853434	0.386669991	0.301101922	0.209894433	0.100987814	0.002334448	-0.109003151	-0.204297937	-0.307754084	-0.399130399	-0.49418144	-0.580807136	-0.665607516	-0.733103706	-0.823145207	-0.876715463	-0.937152623	-0.967532239	-1.013957515	-1.047942195	-1.072209333	-1.056854307	-1.057759159	-1.047702104
0.092157905	0.205376923	0.287995037	0.388631409	0.476564768	0.56216762	0.656572822	0.713517631	0.800716374	0.831981729	0.912500855	0.936351801	0.999912303	0.999178678	1.025741611	1.026174442	1.026285935	1.017371631	0.999331267	0.968464351	0.919694347	0.879341897	0.800399051	0.746515936	0.680285404	0.581795499	0.494542283	0.405683848	0.308999163	0.199370322	0.098444497	0.006594619	-0.100102534	-0.213522559	-0.329479424	-0.42780022	-0.514264109	-0.584194779	-0.68164077	-0.751585852	-0.843924959	-0.888960613	-0.945815874	-0.985629352	-1.03636945	-1.065212379	-1.083570347	-1.087623765	-1.086502039	-1.049918719
0.101141516	0.202724097	0.293824946	0.37877709	0.465067007	0.554119969	0.626892553	0.705472701	0.767552867	0.838773438	0.877304782	0.906151329	0.958089625	0.974387998	1.008690548	0.99576656	0.992851335	0.985499544	0.96061716	0.917012886	0.887742927	0.821933748	0.772204866	0.714618026	0.64494634	0.547572764	0.455303013	0.396280259	0.285711646	0.189107976	0.103514181	0.008243996	-0.100795897	-0.191735932	-0.288541592	-0.381823879	-0.482684789	-0.563015726	-0.639180046	-0.712098342	-0.776345272	-0.817164412	-0.889381226	-0.932882236	-0.960700722	-0.988403486	-0.989418908	-1.000490844	-1.000974	-0.971801003
0.099327853	0.191965011	0.295221665	0.383291148	0.479892933	0.564081578	0.645250259	0.710443502	0.785300436	0.850394537	0.900848659	0.94659079	0.976198249	1.00746575	1.022112062	1.027857314	1.033155641	1.012719461	0.997641653	0.953378653	0.917913312	0.871005847	0.799191421	0.732942283	0.662263019	0.582971653	0.500236974	0.403119372	0.308654124	0.205580977	0.103788759	-0.007097709	-0.089879737	-0.196892453	-0.310323533	-0.40416987	-0.498088809	-0.596436088	-0.679802412	-0.758197384	-0.826451734	-0.894665914	-0.948532855	-0.983831474	-1.035469427	-1.048442569	-1.072805753	-1.079278963	-1.08344839	-1.058808669
0.055257141	0.158773706	0.302761144	0.430170412	0.536835365	0.529318299	0.490054366	0.376184004	0.264987383	0.209125145	0.224320534	0.303487057	0.44678456	0.585248787	0.698445282	0.748037366	0.705231186	0.579756227	0.441576869	0.30422212	0.218003113	0.197976886	0.263562106	0.379373961	0.475873549	0.533420575	0.526256736	0.439889401	0.297517933	0.168799663	0.03932139	-0.009843155	-0.046267686	-0.150984832	-0.31051883	-0.436435957	-0.532516973	-0.535126115	-0.478140334	-0.370281123	-0.271343551	-0.209489335	-0.226898345	-0.301192711	-0.42813315	-0.57409598	-0.701661831	-0.745154531	-0.714094234	-0.593313611
0.089415748	0.203617138	0.284799766	0.384061141	0.468629824	0.569969486	0.640752357	0.698505788	0.773255953	0.826343616	0.870585147	0.932917288	0.968528707	0.98346914	0.989976672	1.006616401	0.994941593	0.973269695	0.950490109	0.931132408	0.889579767	0.840064292	0.775404644	0.710303995	0.342747224	0.557314993	0.482092958	0.379968246	0.294628724	0.189818269	0.091708504	0.005057938	-0.093873603	-0.185797411	-0.295347043	-0.385454499	-0.472969073	-0.556769803	-0.634438875	-0.707410955	-0.778786435	-0.826723592	-0.89064157	-0.918459024	-0.958366389	-0.982362907	-0.989876839	-1.006179385	-1.00127017	-0.979146619
0.268179045	0.442587879	0.587638224	0.621603722	0.611393817	0.595042618	0.579670022	0.606719947	0.679653457	0.788025064	0.887278615	0.924771638	0.929344022	0.910048933	0.874080841	0.865800469	0.88235842	0.903068552	0.92363061	0.913382211	0.877814777	0.787065143	0.693407645	0.611170636	0.591176283	0.583678286	0.618464145	0.636463415	0.587197561	0.463890802	0.25168688	0.011380418	-0.255875258	-0.45655143	-0.578640911	-0.627739236	-0.603798747	-0.578970424	-0.560619774	-0.601406177	-0.697296141	-0.779370194	-0.888642028	-0.923892784	-0.941748453	-0.911753363	-0.872899915	-0.857552396	-0.879929069	-0.910576896
0.078039407	0.25427977	0.484718733	0.66425964	0.727973263	0.65451932	0.494573845	0.423197946	0.60707959	0.84659085	0.965381892	0.96402309	0.913403819	0.853287434	0.842321181	0.849508796	0.838993995	0.855681838	0.917235781	0.985108725	0.970489553	0.843388761	0.617945071	0.424633551	0.489834711	0.650597939	0.733754706	0.662525854	0.48888995	0.251353672	0.073586092	-0.004076799	-0.070011996	-0.240956634	-0.477994818	-0.668890813	-0.736567508	-0.655255135	-0.485401401	-0.427964678	-0.612062604	-0.845999216	-0.970940116	-0.981386269	-0.911720342	-0.853444926	-0.842946239	-0.85091869	-0.835570292	-0.845955428
0.091727341	0.197152144	0.294742214	0.385669996	0.48024121	0.556379904	0.632750749	0.695934309	0.770899349	0.831470393	0.875536044	0.927066584	0.964092269	0.969216646	0.991345151	1.006847857	0.983989671	0.987650115	0.964209612	0.928988771	0.883221453	0.83366774	0.763844976	0.704945861	0.638995758	0.555364512	0.47236631	0.395824405	0.28088447	0.200878404	0.097442187	-0.006329608	-0.099473571	-0.201937206	-0.2971306	-0.389448094	-0.47556033	-0.549541377	-0.637277194	-0.707416907	-0.780102458	-0.846533759	-0.878992931	-0.918655824	-0.956867247	-0.977354952	-0.989726993	-1.000846147	-0.991822119	-0.976832772
0.091992454	0.189501814	0.287765811	0.38449175	0.476281521	0.555094377	0.634622045	0.698564836	0.774849821	0.846766985	0.877432667	0.913818103	0.950711121	0.970622269	0.999591454	0.99744674	0.993726551	0.983536034	0.950724563	0.924899049	0.879249979	0.835583708	0.765664392	0.708237844	0.636630425	0.554589041	0.47587461	0.380455851	0.297122979	0.196068405	0.096363431	0.0040009	-0.098497212	-0.193683444	-0.279846426	-0.38950276	-0.467007168	-0.548752357	-0.631363038	-0.70919259	-0.772805995	-0.822820289	-0.877272303	-0.917373106	-0.949076336	-0.97730402	-1.006257793	-0.998512699	-1.004221111	-0.971103548
0.092837249	0.181191656	0.298707543	0.369865981	0.464955283	0.559401723	0.647409275	0.700795569	0.765965714	0.817327296	0.888119666	0.912924435	0.976401779	0.988049809	0.993646297	1.002836104	1.006175033	0.994628679	0.963470442	0.915324098	0.871973564	0.833688696	0.770032331	0.707550471	0.629685791	0.562881464	0.478997896	0.39215696	0.302976337	0.207269934	0.091952323	0.007328109	-0.09270887	-0.201617254	-0.285050576	-0.385965195	-0.474227151	-0.565684394	-0.639021933	-0.71760544	-0.770228646	-0.81841885	-0.898633776	-0.916020816	-0.930575334	-0.989021881	-0.991606444	-0.996498934	-0.985836491	-0.969737907
-0.387527508	1.976317582	3.924633573	2.500382293	0.309794928	0.074522538	5.157759894	-3.463415047	-0.142983223	4.872278461	4.364604574	-0.894986658	4.715156361	-0.048246373	-1.540814006	1.742388525	1.024506525	2.983740034	1.615993785	1.824720594	-0.76782815	-1.644280322	5.583696487	-2.701677045	1.772207338	-1.875654188	3.578307646	2.302663413	4.887849562	-0.620157074	-6.565741595	2.18763279	-1.283962373	-4.43144685	-2.398308629	-1.310860519	-7.402796397	1.315197458	-0.747875641	-3.02579498	-2.243241145	-0.664324891	-2.007319798	1.951174006	1.726668842	-4.518127743	0.980991868	-0.581869533	0.055326429	-2.58527052
0.238542668	0.420551835	0.602056206	0.695053517	0.753073884	0.765738902	0.721518615	0.692815434	0.672071653	0.697572864	0.71611601	0.772934744	0.848079875	0.920763558	0.975232559	0.997447316	0.982847567	0.919912653	0.869415169	0.789118504	0.718416911	0.682445642	0.688114709	0.704893879	0.726593327	0.761285724	0.756126867	0.703309029	0.602245529	0.440356296	0.233407196	-0.003456292	-0.223082324	-0.428505096	-0.57250615	-0.68151321	-0.722370042	-0.724233576	-0.698680689	-0.642141372	-0.62884462	-0.628727014	-0.661628362	-0.71288641	-0.771137183	-0.838345891	-0.874487209	-0.886929918	-0.874044711	-0.840906422
0.055623879	0.190977267	0.378204795	0.519893054	0.585569256	0.528130168	0.369167776	0.140911607	0.087068394	0.245296986	0.298598277	0.243773015	0.098298756	0.087893236	0.221242879	0.284460121	0.223612317	0.08232193	0.091063514	0.242682163	0.306174453	0.254107323	0.090186106	0.140278216	0.368617854	0.537502698	0.578820471	0.520612043	0.375050801	0.192645059	0.058415521	-0.000299283	-0.055875051	-0.187520315	-0.366524621	-0.521356773	-0.582461862	-0.531021234	-0.371535145	-0.148679009	-0.08045835	-0.244514084	-0.298871872	-0.233638597	-0.097159121	-0.088818426	-0.224273981	-0.28223626	-0.234228437	-0.089396426
0.044524655	0.183927507	0.360869791	0.509499306	0.587394015	0.548231213	0.430550867	0.253159494	0.078483005	0.05520963	0.077789889	0.017732647	0.14389797	0.313463562	0.457874212	0.511193133	0.46379765	0.320344672	0.149500491	-0.004169227	0.077900314	0.049565191	0.071182836	0.249809078	0.431575057	0.55907751	0.578198104	0.51148993	0.350080974	0.193669354	0.06314009	0.003865032	-0.049247988	-0.184680447	-0.350653675	-0.501004438	-0.579677751	-0.560107384	-0.431957984	-0.266754005	-0.073169738	-0.058521594	-0.080628811	-0.007738517	-0.145663411	-0.311181441	-0.447703163	-0.507423536	-0.451304327	-0.332147451
0.084969805	0.196527674	0.301561121	0.388047244	0.478658395	0.564257326	0.64661673	0.722403763	0.789101274	0.849142122	0.904488798	0.954876953	0.971703549	1.006157873	1.026536705	1.023635732	1.042207034	1.011626657	1.00009692	0.969882	0.920138883	0.877834257	0.803962057	0.736779793	0.670490648	0.583484841	0.495391866	0.402951364	0.308571333	0.201219959	0.109209138	0.000664313	-0.092214403	-0.215670113	-0.313330631	-0.418966003	-0.509317812	-0.606749706	-0.688779043	-0.757118261	-0.833669992	-0.900747705	-0.957864021	-1.010235947	-1.0469119	-1.075110383	-1.103901914	-1.104305952	-1.094159733	-1.097999211
0.181851733	0.346535975	0.475914204	0.575347762	0.639568261	0.678728823	0.691356893	0.712447032	0.729222762	0.757014015	0.79349918	0.851194775	0.90908344	0.96631463	1.014163859	1.02474864	1.011075284	0.969541028	0.914798255	0.875299264	0.808487242	0.767724145	0.743567641	0.723965586	0.718840446	0.684050204	0.657625307	0.584028758	0.48089281	0.348940033	0.17274452	0.009471036	-0.159008714	-0.33424977	-0.456017495	-0.558239282	-0.616577809	-0.648662434	-0.657616633	-0.6546641	-0.683926989	-0.68834653	-0.738436864	-0.782065189	-0.827493841	-0.868940937	-0.904125463	-0.9170997	-0.898566989	-0.849749217
0.096343196	0.194994726	0.294644917	0.381438317	0.485123298	0.563456914	0.618703066	0.708364737	0.760076673	0.829792387	0.877811708	0.92557486	0.965122069	0.983441002	0.995996407	0.998247267	0.995746636	0.980211109	0.955559858	0.922997269	0.899708289	0.831490107	0.774117576	0.715012581	0.632558865	0.560376763	0.475684948	0.392480336	0.290356176	0.194458745	0.083459982	0.001643878	-0.105126001	-0.19418396	-0.28418886	-0.3841286	-0.467589089	-0.551321883	-0.645231159	-0.714234858	-0.766634212	-0.835639784	-0.883002783	-0.92248315	-0.955165185	-0.98801543	-0.989855157	-0.992749788	-0.991303505	-0.9814122
0.064335507	0.197109608	0.395396905	0.558587464	0.613324259	0.519802854	0.346098782	0.230248482	0.395863945	0.601305982	0.704174934	0.671039914	0.596488882	0.494571315	0.460545748	0.465393758	0.462859423	0.489494626	0.579074825	0.683932974	0.707693409	0.614228188	0.4086672	0.230334783	0.337905253	0.526834667	0.613876277	0.548419282	0.409071986	0.220645623	0.06429176	0.002745787	-0.046477075	-0.209331397	-0.398059815	-0.567765159	-0.596340804	-0.530613102	-0.356170571	-0.220233173	-0.396316678	-0.601713691	-0.700535224	-0.680467176	-0.590811942	-0.50275557	-0.472533711	-0.471926077	-0.467096324	-0.498522529
0.095305888	0.18059841	0.287295567	0.381451721	0.477109684	0.559820634	0.633239503	0.72285107	0.774531538	0.82657839	0.889664849	0.920731752	0.965440958	0.984865165	0.991722502	1.007871933	0.97495192	0.988218737	0.971934658	0.930061583	0.888341453	0.827273143	0.77772433	0.717939635	0.651756319	0.567589489	0.464138084	0.37586505	0.283088087	0.200557582	0.091164224	-0.00985661	-0.101317348	-0.205139269	-0.280588899	-0.390123861	-0.466704046	-0.561615706	-0.620342115	-0.699960686	-0.774078007	-0.838329882	-0.884708115	-0.918536932	-0.954118772	-0.984420495	-0.994324201	-0.990966583	-0.995582253	-0.961985347
0.089269488	0.201998859	0.28395699	0.404186409	0.458800352	0.549175402	0.650149048	0.71959887	0.789478204	0.83880943	0.903608095	0.958363725	0.985299479	1.001034641	1.022849124	1.046838309	1.023421511	1.039131938	0.987056156	0.944920271	0.9194195	0.871817426	0.808180357	0.751921629	0.656145211	0.583194485	0.493589381	0.381127672	0.305385278	0.1924136	0.132575753	-0.010176304	-0.098922241	-0.213316696	-0.310534921	-0.385068585	-0.519514629	-0.610092495	-0.667306506	-0.743715236	-0.826973321	-0.888543315	-0.920163503	-0.993816584	-1.040704398	-1.064757357	-1.087085283	-1.093839818	-1.09730644	-1.063662973
1.197674114	3.283743961	2.799648885	4.399764192	2.924271611	-1.815119458	1.615524566	-2.2250552	2.474462198	-4.378617315	1.427904614	-1.948400059	-1.857896183	3.530695809	-0.943191407	1.43823139	-5.853959924	1.795325151	3.386771387	2.538220027	0.653604444	5.979849737	1.166305245	-0.329789343	-1.971234503	-0.836055332	-1.984328809	-5.848064802	1.443192249	6.695142121	2.481909326	3.135292124	6.526432695	5.349837381	3.50621815	-1.367510577	-2.140182418	1.954653825	-6.407601208	4.512697075	2.183434663	-1.904546613	-0.89817417	-3.639641053	2.299605623	-2.612321229	-0.974325257	4.180529881	-5.42004991	-5.041910174
0.180158481	0.351275499	0.475735832	0.580637359	0.647290907	0.683770395	0.698768204	0.697365258	0.7329222	0.747422257	0.791908358	0.849131862	0.911755635	0.954285983	1.002605178	1.022083388	1.015983627	0.960018643	0.921671202	0.867403398	0.800274362	0.769162933	0.737919113	0.725354088	0.709956533	0.693886834	0.661320845	0.591706326	0.493160725	0.351286641	0.192064093	0.007184391	-0.172828337	-0.323319921	-0.46097305	-0.555529571	-0.619771401	-0.648631401	-0.661188033	-0.669361624	-0.667548521	-0.681533337	-0.712073894	-0.769912354	-0.803500804	-0.86137065	-0.893839992	-0.913266724	-0.893227252	-0.862200584
0.223335605	0.414570688	0.574923957	0.684126263	0.716213399	0.724776706	0.725131675	0.70648733	0.68738219	0.697266376	0.721793027	0.78226398	0.853815751	0.937493309	0.982682552	0.999343174	0.997294653	0.943583966	0.887006031	0.810844418	0.75068402	0.711790419	0.70836657	0.713421732	0.741400869	0.746722355	0.740284921	0.681296019	0.582466806	0.425831772	0.229736822	0.0052903	-0.212288331	-0.41822604	-0.559708857	-0.663440511	-0.686592729	-0.70755244	-0.691687476	-0.652133806	-0.630438072	-0.639010211	-0.670390318	-0.722783317	-0.777888213	-0.844368049	-0.883699955	-0.891589305	-0.880301781	-0.837063464
0.097667295	0.179821241	0.292322719	0.368987247	0.467368924	0.558364739	0.632703343	0.705663705	0.776559824	0.843714827	0.871254296	0.926601962	0.960690787	0.981408709	0.990662415	1.000074111	0.993935597	0.982039872	0.957203841	0.93440078	0.874505406	0.837782926	0.778665504	0.706558427	1.123100433	0.556982745	0.469501763	0.38895104	0.303205663	0.194802571	0.115705093	0.013245167	-0.088211977	-0.183409908	-0.284293569	-0.381388494	-0.482376	-0.551201667	-0.640010486	-0.703327883	-0.779478132	-0.835769972	-0.877969584	-0.926700506	-0.950698695	-0.977135874	-0.983831159	-0.995406083	-0.983760645	-0.984036865
0.097758786	0.203024865	0.295658163	0.368235368	0.471696287	0.548613106	0.623931701	0.711147971	0.767800604	0.841412339	0.881092579	0.922928972	0.956777676	0.983263179	0.994479877	0.990006974	0.98571063	0.986427924	0.960104905	0.933283423	0.884027984	0.831956246	0.771098099	0.702367171	0.284169911	0.546744113	0.476887098	0.389089119	0.281896533	0.210053187	0.105746453	0.005817483	-0.083007433	-0.180092624	-0.292509837	-0.386633919	-0.467707137	-0.555758489	-0.636657166	-0.708069817	-0.764853809	-0.836055962	-0.876406816	-0.919107573	-0.959775975	-0.988838622	-0.990825535	-1.016917903	-0.995718336	-0.978671748
0.096351138	0.189347396	0.296210187	0.374997596	0.471197289	0.558447911	0.634517991	0.718052947	0.776488297	0.836418629	0.875387596	0.929689839	0.953230067	0.978895644	0.9913252	0.993242453	1.004905667	0.983346397	0.963215894	0.922143804	0.878396581	0.837190112	0.763914104	0.705479807	0.375290354	0.56364975	0.473862772	0.369579626	0.295136926	0.183424918	0.091894509	0.004891505	-0.09800805	-0.189038707	-0.304298024	-0.383216092	-0.470730288	-0.551094778	-0.625832304	-0.695318629	-0.772377901	-0.835366777	-0.880524832	-0.923804024	-0.945109615	-0.991785466	-0.988480029	-1.001741782	-1.000379804	-0.975214157
0.09473453	0.19876235	0.287811043	0.37578284	0.470445879	0.539036786	0.637175707	0.70166382	0.773915752	0.831475685	0.890465852	0.921338369	0.965077469	0.988905524	0.995953952	0.994527883	0.993341081	0.983590614	0.966780809	0.913881171	0.889326936	0.834017073	0.78134356	0.713960574	0.633864618	0.55696584	0.469941319	0.382672375	0.30563373	0.196335963	0.09111084	-0.004307717	-0.102502627	-0.189856722	-0.29428807	-0.37614903	-0.463205059	-0.537702804	-0.641650564	-0.714702705	-0.77443586	-0.826196188	-0.883063994	-0.924826481	-0.957572933	-0.997914385	-0.987406674	-0.999482435	-0.990080436	-0.996508134
0.105834242	0.189949234	0.294127682	0.383050413	0.468999488	0.55083487	0.641969815	0.713009458	0.77836666	0.830321401	0.889854531	0.938930123	0.971694268	0.977350819	0.998022673	1.006011082	0.993080512	0.986556599	0.96376626	0.930653023	0.89249656	0.835172347	0.773797758	0.699683578	1.058879816	0.552115562	0.488348923	0.386019508	0.280047848	0.194473408	0.092828197	0.002220674	-0.100650161	-0.189606928	-0.288019538	-0.378372644	-0.480696749	-0.555712171	-0.629251052	-0.700303289	-0.774129935	-0.800062293	-0.883858848	-0.918006907	-0.962447448	-0.974092911	-0.996234724	-1.012073506	-0.999190139	-0.97319792
0.09726785	0.194687072	0.276698373	0.37901852	0.475414598	0.56065497	0.62159682	0.713941582	0.771604612	0.838302332	0.889739358	0.924940589	0.948494643	0.976810853	0.987404089	1.00357973	1.008846853	0.98762425	0.948404433	0.9221547	0.895689386	0.843090554	0.778592643	0.714671488	0.637494659	0.565303101	0.480169252	0.382659116	0.294832422	0.193080762	0.100531678	0.006048597	-0.091341633	-0.192347691	-0.298982789	-0.38479564	-0.463126929	-0.561687614	-0.623040773	-0.70666328	-0.775087256	-0.82976893	-0.881141878	-0.919301685	-0.947730615	-0.992447619	-0.993132475	-0.99744499	-1.002217273	-0.9730947
0.20181353	0.396665865	0.538436153	0.649120201	0.700739369	0.724805628	0.709745438	0.699612682	0.692569582	0.715695261	0.752553793	0.800482144	0.875494357	0.939129125	0.990371101	1.00451782	0.993187832	0.956930033	0.891196729	0.812197253	0.774218724	0.725846766	0.719600013	0.710122351	0.723004365	0.73262429	0.717474909	0.669287859	0.547655606	0.403063606	0.206017979	0.000967679	-0.214883796	-0.391279435	-0.53222391	-0.634808558	-0.680312185	-0.685862054	-0.669262901	-0.671904391	-0.654601149	-0.660572073	-0.691611968	-0.726926273	-0.79732356	-0.854635361	-0.880573539	-0.896681375	-0.882861235	-0.845189416
0.099676282	0.198996624	0.289095672	0.379783198	0.469288504	0.544409108	0.652905203	0.70377977	0.769631503	0.823616948	0.882543436	0.918530784	0.958094723	0.977211889	0.995869535	0.999460727	0.994893452	0.975646525	0.960878002	0.922038084	0.881954294	0.824736637	0.780635488	0.708012711	0.23712556	0.559290702	0.475336745	0.396349624	0.297857327	0.199421736	0.107629763	0.001312209	-0.105326166	-0.202532151	-0.279789546	-0.376532502	-0.468546259	-0.556169811	-0.625341265	-0.694712213	-0.770038399	-0.826982901	-0.876336339	-0.917620462	-0.948901853	-0.984436664	-0.990446319	-0.998243266	-1.000679356	-0.980786975
0.097625871	0.199726356	0.292706709	0.377682823	0.476318181	0.547102431	0.627353513	0.707873156	0.762645022	0.836720046	0.876862694	0.921704712	0.960078582	0.980557449	1.008346672	0.98955269	1.018953272	0.989378534	0.949584802	0.926119293	0.891411595	0.838783449	0.775459787	0.702907084	0.37983826	0.549605517	0.47511976	0.375949443	0.292101185	0.197788493	0.115941887	-0.001892691	-0.099984318	-0.187493284	-0.293749473	-0.38752533	-0.467381564	-0.544540913	-0.631902387	-0.70509978	-0.771043327	-0.829855636	-0.879597982	-0.921567872	-0.945445022	-0.982313981	-0.995009874	-1.00641889	-0.989595299	-0.991861791
-0.161213307	0.069095048	1.290833315	1.430166672	0.937157091	1.556497474	1.095401047	1.094410664	1.916842771	0.325512297	0.019276287	1.991116262	0.129137849	0.684126223	4.416270661	0.536309027	4.200398532	0.866724866	0.677417219	1.543435276	0.698817587	0.498532237	1.758509348	0.397115215	3.387638516	1.757779318	-2.345570905	1.212857877	0.584540597	1.33241043	1.020303589	-0.842114565	0.533101997	-0.27911214	-0.000708701	-0.20428545	0.484023825	-1.566212555	0.361197559	-1.672933431	-1.76045095	0.820954778	-0.298906473	-0.811657209	-1.303774956	-2.309953673	-1.90793349	0.268333698	-1.46357934	-1.452365087
0.098662508	0.193226576	0.283791414	0.389243266	0.478939729	0.572017386	0.652390683	0.714226049	0.784150081	0.853222442	0.901044894	0.929322775	0.986721876	1.009327385	1.019185348	1.03101626	1.034064409	1.022152049	0.995981262	0.964442444	0.913461446	0.872413445	0.805029521	0.742237696	0.65774076	0.576797203	0.499146558	0.391761736	0.308401472	0.215751104	0.105501512	0.001553539	-0.100435973	-0.211407986	-0.304530855	-0.395151679	-0.505117826	-0.594689728	-0.668252539	-0.748455199	-0.834660693	-0.889421569	-0.927855801	-0.994270276	-1.037024978	-1.049348248	-1.082246158	-1.083151049	-1.071169127	-1.056133717
0.203627036	0.36913994	0.47304452	0.533316542	0.570774216	0.57383607	0.60116217	0.647484443	0.712512453	0.807831102	0.876605033	0.92125705	0.940186874	0.940176645	0.936812434	0.920436963	0.921401723	0.939001863	0.947743883	0.927021602	0.882944703	0.812598085	0.72805156	0.635946686	0.608852051	0.569736325	0.566640286	0.539826765	0.472986985	0.363622175	0.205029507	-0.006807827	-0.190341545	-0.357453805	-0.480899676	-0.537110092	-0.550585816	-0.576238289	-0.595207824	-0.641551698	-0.731311071	-0.811208418	-0.875121826	-0.916009797	-0.953308579	-0.939485013	-0.929301056	-0.925649877	-0.928377068	-0.929414765
0.095648872	0.187435678	0.298700551	0.384653033	0.461417102	0.558738752	0.642424178	0.70878695	0.770981063	0.835921849	0.88007115	0.927907882	0.945387269	0.978743004	1.007564536	0.998859346	0.994738091	0.976809834	0.958107419	0.929328207	0.876001233	0.83159281	0.779777698	0.709891851	0.543133161	0.560103091	0.460859449	0.388673875	0.300201162	0.211940945	0.091437671	-0.00465143	-0.104861207	-0.187050624	-0.291270331	-0.373844011	-0.477108747	-0.555482631	-0.627559385	-0.70179347	-0.774440939	-0.836515323	-0.888789704	-0.909619149	-0.96135279	-0.980866931	-0.998410231	-0.997379022	-0.991128925	-0.987789109
0.091584876	0.214607053	0.288670099	0.389341437	0.47008755	0.560992651	0.626946133	0.707927469	0.775027528	0.835543939	0.882658993	0.915910307	0.944416737	0.964084749	0.995310846	0.997718537	0.988431653	0.972929947	0.954114494	0.935359486	0.890263059	0.841088592	0.777560101	0.707551678	0.642697864	0.569452493	0.466029798	0.380334746	0.301343012	0.203368671	0.10151386	-0.011251195	-0.087126173	-0.203140275	-0.273080207	-0.378271679	-0.468847064	-0.543154964	-0.641218853	-0.70339304	-0.776539192	-0.846793681	-0.88015387	-0.924028379	-0.963723403	-0.980890585	-0.983959193	-0.994385131	-0.991598031	-0.995803511
0.051500211	0.190358763	0.353337175	0.50621144	0.583995609	0.55779024	0.424219925	0.23775051	0.053693665	0.079419315	0.10370848	0.034966073	0.120018566	0.292271838	0.426975695	0.482019996	0.422911607	0.292036053	0.117553253	0.031724488	0.103480028	0.078095169	0.047909761	0.238078816	0.420315927	0.556921057	0.584040137	0.510283666	0.362050063	0.192661507	0.055629624	0.007020693	-0.050381123	-0.180212538	-0.360442011	-0.511943676	-0.586008833	-0.55602926	-0.431104404	-0.240284357	-0.058016353	-0.074225469	-0.102708109	-0.039281881	-0.114263939	-0.29108161	-0.424621425	-0.481755732	-0.426866729	-0.295446666
0.074177196	0.270922713	0.488793962	0.687897061	0.766675539	0.677791252	0.515611222	0.456274665	0.654985948	0.8755284	1.013051698	1.034309652	0.968146371	0.906998991	0.890681552	0.905464312	0.897732706	0.910728672	0.951263346	1.024346882	1.017092839	0.876069319	0.641873997	0.459444791	0.505443761	0.68668959	0.763983856	0.7013976	0.496260172	0.26770514	0.074600428	0.004860095	-0.068742058	-0.250661829	-0.494929435	-0.681717895	-0.761049837	-0.687703915	-0.518401615	-0.445511843	-0.645244852	-0.884690178	-1.016185345	-1.021950834	-0.957094949	-0.904245685	-0.905087507	-0.907068588	-0.90718086	-0.908618708
0.100537558	0.200182837	0.303057274	0.385068819	0.480238387	0.569048921	0.623569614	0.704106282	0.776294143	0.835842322	0.888826723	0.924400938	0.966115689	0.995659771	0.993370556	1.002479835	1.000858003	0.987678699	0.954539573	0.923156547	0.886022217	0.826837199	0.771732298	0.707927852	0.634394696	0.561884363	0.467587603	0.382967364	0.296656707	0.193454195	0.091066789	-0.000859578	-0.092244768	-0.201154955	-0.284093971	-0.384618846	-0.484865493	-0.552903829	-0.645021649	-0.703931564	-0.78165856	-0.836868899	-0.875206764	-0.916500675	-0.940847933	-0.976837321	-0.996689318	-1.001236624	-0.981399521	-0.982860178
0.105441363	0.192076587	0.294071753	0.381744374	0.459190461	0.566183642	0.631133003	0.717838152	0.768249775	0.822835397	0.886938266	0.929022797	0.957778307	0.981552669	0.998178669	0.998684324	0.999891585	0.976490739	0.955542223	0.927942196	0.881606082	0.82089713	0.77557903	0.720341943	0.461331991	0.54445862	0.473937256	0.388883052	0.286419754	0.198047905	0.090562496	-0.000473071	-0.09532795	-0.188551258	-0.284300977	-0.386154538	-0.466085656	-0.561723076	-0.637787547	-0.704696907	-0.76279085	-0.838066312	-0.884729662	-0.915243608	-0.945495972	-0.9769656	-0.990482611	-0.999714172	-0.984173237	-0.974405673
0.093556598	0.18753096	0.307897167	0.387882344	0.47159345	0.549542356	0.617995265	0.709446393	0.774021605	0.843987245	0.887537021	0.912715273	0.971499354	0.977492978	0.981603175	0.997133339	0.99382206	0.974640946	0.963582731	0.932564987	0.867423996	0.82398218	0.764640477	0.705096782	1.084769927	0.549979614	0.47615507	0.390511889	0.28262142	0.187505527	0.109945946	0.004276148	-0.096616017	-0.19696565	-0.297773758	-0.383567707	-0.4824652	-0.547833604	-0.635375022	-0.716694429	-0.777725935	-0.83950277	-0.890243951	-0.920979363	-0.960343926	-0.983414147	-0.998489825	-1.00397535	-0.996501427	-0.983775272
0.093840724	0.193639382	0.293242312	0.385152213	0.470703391	0.552412486	0.630541003	0.704806897	0.772032104	0.844589175	0.882101728	0.928938377	0.95160382	0.97991267	0.994968147	1.010294286	1.004167537	0.972845078	0.960982216	0.91711211	0.898520589	0.839783914	0.777785266	0.701156823	0.637838124	0.5525618	0.473802405	0.381748687	0.290809014	0.204800379	0.097424213	-0.001593021	-0.093537885	-0.192036922	-0.29486763	-0.376891914	-0.467669804	-0.546438989	-0.634515383	-0.701356122	-0.780913388	-0.817077708	-0.899520294	-0.916403948	-0.967579511	-0.979186271	-1.004173676	-1.00480213	-0.994068288	-0.984685642
0.053908395	0.193106291	0.370914975	0.511483608	0.561092015	0.475451085	0.289119161	0.112223001	0.292969089	0.495957669	0.574732335	0.541678408	0.422432362	0.278037828	0.226386071	0.212502558	0.225209169	0.290396365	0.409029738	0.53472877	0.578842243	0.487119661	0.29986775	0.110415099	0.286985977	0.472207799	0.559662048	0.518692803	0.372181345	0.203109934	0.052355884	-0.005989279	-0.04687981	-0.187190355	-0.364315401	-0.50478887	-0.562177217	-0.490303744	-0.302568904	-0.113085606	-0.287787419	-0.491622231	-0.575284663	-0.551687488	-0.415679165	-0.300176036	-0.222275961	-0.215771916	-0.223845648	-0.280990628
0.107965551	0.192343314	0.285308054	0.380284316	0.476502818	0.571315	0.63684163	0.699424593	0.772969362	0.824508926	0.880137992	0.919676308	0.950855118	0.984428799	0.995336492	0.991979209	0.991147207	0.971977165	0.955385011	0.921760469	0.883379767	0.842702165	0.767952086	0.709207152	0.641773355	0.562666233	0.469456106	0.368335746	0.299517051	0.202555507	0.09255116	0.00911769	-0.090108344	-0.177787643	-0.282496698	-0.383404709	-0.471323128	-0.549974554	-0.635548882	-0.688505559	-0.780684309	-0.82369821	-0.880497906	-0.924468766	-0.943378675	-0.98245265	-0.984474795	-0.989009048	-0.999320045	-0.975887814
0.094149496	0.198414081	0.293397659	0.385369616	0.46386356	0.542676717	0.639965036	0.712615755	0.770495251	0.830619425	0.882993681	0.931680511	0.954289547	0.987329812	0.992697924	0.998207188	0.99415959	0.989109356	0.968308551	0.929351749	0.881426471	0.822559105	0.770643053	0.709327429	0.296772345	0.560804526	0.465634694	0.378175915	0.288653999	0.193203132	0.101193879	0.004376753	-0.098287638	-0.184721674	-0.28703943	-0.382059374	-0.468880574	-0.555223321	-0.636288695	-0.705124178	-0.782648189	-0.825052025	-0.871122386	-0.940035024	-0.962623384	-0.976224248	-0.994639001	-0.992389321	-1.004675901	-0.986263006
0.095699285	0.194393973	0.289066673	0.389989868	0.470179402	0.559124631	0.646558692	0.707099263	0.790558338	0.845572164	0.888428881	0.928563605	0.955748453	0.986294096	0.997510918	0.992119966	0.999406564	0.976342075	0.948271201	0.92331305	0.882248971	0.829191177	0.767203888	0.706861977	1.111963702	0.566650158	0.472851019	0.377697318	0.283394484	0.186123797	0.093922789	-0.003016125	-0.101443225	-0.196480084	-0.281574632	-0.371085097	-0.474366128	-0.553473468	-0.637457271	-0.711261212	-0.766215928	-0.834125101	-0.894044586	-0.929494262	-0.95930298	-0.98723323	-0.978808329	-0.996397826	-0.998870935	-0.982253853
0.095855397	0.190990755	0.284040128	0.399109612	0.480250409	0.5458033	0.635039873	0.694656404	0.761101652	0.841692432	0.873971627	0.923922985	0.945181348	0.994178364	0.991311237	0.996453338	1.007811653	0.986901773	0.957181673	0.920336692	0.878189897	0.836249793	0.771214189	0.72724369	0.631363848	0.553843683	0.47529217	0.384803861	0.280968619	0.195818723	0.104506434	-0.008290788	-0.087946815	-0.177040166	-0.291370309	-0.376986221	-0.47280081	-0.557633164	-0.62670625	-0.686746332	-0.758295783	-0.81644801	-0.857081303	-0.920701084	-0.955064223	-0.980544946	-0.989720568	-1.005032986	-0.998466684	-0.984074654
0.071709272	0.255443047	0.486340173	0.680325251	0.749791425	0.670585149	0.496358065	0.434231608	0.630665864	0.85802628	0.993204975	1.003775048	0.93869155	0.89371006	0.872146966	0.873619222	0.879453829	0.872836522	0.943008354	1.001303768	0.988528285	0.872030908	0.64492866	0.441341426	0.496141793	0.673284169	0.752576432	0.68862338	0.495069197	0.261616851	0.07515916	0.002496801	-0.061727298	-0.252408748	-0.487696278	-0.68155161	-0.75116601	-0.672570868	-0.49682523	-0.43965597	-0.630545628	-0.859111307	-0.992686269	-1.00352336	-0.941055404	-0.882957647	-0.87911624	-0.875588636	-0.883833957	-0.886902059
0.101221394	0.192467615	0.290507019	0.391552023	0.475049031	0.553599751	0.631356244	0.712091932	0.779426266	0.825930438	0.878643428	0.926792888	0.945984588	0.974753752	0.98096565	0.997275599	0.989579284	0.979157639	0.95008298	0.925120251	0.882900009	0.836127825	0.775679681	0.701682514	0.634537875	0.551378093	0.476007358	0.388144247	0.288347048	0.19218276	0.106523006	-0.001130239	-0.10062563	-0.19356803	-0.283987692	-0.384666936	-0.477411808	-0.546010927	-0.641447797	-0.708732288	-0.773690577	-0.825124632	-0.878085572	-0.921245944	-0.955221411	-0.979425269	-0.997493193	-1.003415163	-0.997983088	-0.987269923
0.098805207	0.203958927	0.29230435	0.387665418	0.471721078	0.55336155	0.653085553	0.713799568	0.800343321	0.856939425	0.902128908	0.954931957	0.988975342	1.00111321	1.036228094	1.03303424	1.026859248	1.015660906	0.989200406	0.974257438	0.923096089	0.887507327	0.799473461	0.754881592	0.694737369	0.590424928	0.503771639	0.404043983	0.29207032	0.198245454	0.088958488	-0.002176975	-0.101310156	-0.195022791	-0.311507683	-0.416605442	-0.494553464	-0.598447004	-0.675675797	-0.759923225	-0.812884126	-0.892515444	-0.94709673	-0.97874504	-1.047506511	-1.07740905	-1.080268099	-1.080268208	-1.074242621	-1.047778358
0.169465675	0.329252723	0.437205561	0.500533488	0.54792943	0.576639425	0.611376477	0.675263425	0.729018349	0.822791316	0.87971562	0.926709298	0.950924368	0.941450899	0.934759998	0.940584735	0.943170319	0.948062516	0.950027475	0.928834026	0.886064526	0.823447078	0.730486017	0.672070595	0.6023396	0.577471894	0.550276344	0.50805204	0.440089523	0.331976121	0.182272557	0.001043788	-0.17547132	-0.313370241	-0.452843492	-0.503777549	-0.549607429	-0.578141135	-0.612588819	-0.655324018	-0.736878416	-0.814444749	-0.873803145	-0.929118468	-0.961641116	-0.949262082	-0.935858319	-0.945333331	-0.922512775	-0.950478093
0.106690712	0.198189319	0.278728855	0.37850308	0.47495832	0.559779354	0.641271229	0.707276744	0.772198075	0.833728112	0.883772521	0.932242769	0.959377441	0.977646862	0.992044676	1.004514567	0.978604934	0.972272541	0.943743322	0.920616169	0.870455194	0.83974662	0.759621615	0.712810998	0.628047302	0.55854193	0.474759256	0.381721896	0.288582727	0.201132306	0.092409982	0.013952031	-0.0915561	-0.195210675	-0.281956429	-0.374212259	-0.46785568	-0.549990974	-0.61949861	-0.70678556	-0.76606599	-0.825787934	-0.882190874	-0.937061569	-0.955868384	-0.973042689	-0.995586607	-0.991110105	-0.99596559	-0.995623902
0.092662984	0.19115304	0.294869066	0.372417064	0.468745734	0.559677447	0.634594582	0.705759433	0.779665016	0.821845624	0.891813061	0.921353512	0.95987101	0.983704296	0.996061371	1.003237889	1.007183669	0.972597339	0.958886024	0.924195752	0.883857616	0.833039841	0.776769534	0.709892389	0.628758234	0.561770708	0.470055131	0.371452407	0.282268073	0.195558826	0.104818733	-0.010320877	-0.097586356	-0.197404211	-0.290472583	-0.383354997	-0.468681005	-0.558135881	-0.639817419	-0.705297239	-0.767555821	-0.821418933	-0.88143185	-0.921940803	-0.955109554	-0.985965562	-0.994531574	-0.998886058	-1.000844317	-0.980705161
0.094445327	0.189320576	0.278984042	0.391626837	0.466889554	0.558692582	0.6398922	0.718980549	0.765378794	0.833478379	0.873150066	0.924643086	0.968723675	0.988812147	0.998491733	1.00496243	0.998455007	0.98239832	0.951464897	0.918706302	0.879280692	0.836404824	0.768926206	0.714216276	0.631528255	0.557342642	0.474660023	0.385064617	0.295373538	0.195835268	0.102193021	-0.001678955	-0.106016694	-0.196383007	-0.301866764	-0.388744284	-0.471277797	-0.552011067	-0.627381592	-0.709023527	-0.777446176	-0.824003262	-0.882344739	-0.931199685	-0.966843014	-0.980567445	-0.994894021	-1.006906926	-0.991236854	-0.983782051
0.099696647	0.205491529	0.284210269	0.384208827	0.474738576	0.561898885	0.630722599	0.698621957	0.762782536	0.82780523	0.889869509	0.918746857	0.960876164	0.98460149	0.993633844	0.994318641	1.000518842	0.976425139	0.964328153	0.909479589	0.881349111	0.822551605	0.770279245	0.69550244	0.645353324	0.553332542	0.483760699	0.373927477	0.300837181	0.197718719	0.098262004	-0.008346724	-0.094110917	-0.196588591	-0.288924534	-0.379750115	-0.477935942	-0.556070034	-0.631272685	-0.706700018	-0.770175121	-0.843660854	-0.886116861	-0.930998672	-0.964664218	-0.973918726	-0.986590183	-1.003281832	-0.992593339	-0.982735026
0.102743864	0.200108168	0.283347846	0.38779075	0.482025747	0.558604227	0.644621505	0.706257552	0.77895689	0.829383341	0.883315138	0.917201524	0.959064358	0.985983131	1.000727971	1.017348209	1.003217856	0.977089468	0.961079156	0.920247715	0.893780804	0.844755117	0.766602725	0.706632356	0.630076099	0.56520717	0.461463634	0.388274702	0.288599179	0.184160595	0.094865285	0.001857563	-0.100718301	-0.191908745	-0.29843727	-0.383735768	-0.477541347	-0.552480941	-0.641965009	-0.71160877	-0.769917334	-0.830890153	-0.883838291	-0.929854139	-0.959745391	-0.971071064	-0.992912379	-0.996089574	-0.98717862	-0.980358675
0.093663053	0.190606342	0.288487965	0.393636694	0.465661474	0.558406225	0.645288151	0.712410787	0.773178262	0.845753123	0.885667344	0.929546347	0.962174347	0.985205496	0.997255764	1.007621445	0.997570607	0.987280184	0.965933958	0.928624808	0.874520817	0.819725935	0.773355265	0.720271481	0.375636215	0.548206842	0.471832124	0.381877598	0.285028083	0.193508465	0.097273478	-0.005311078	-0.094300682	-0.187228943	-0.294162903	-0.385576568	-0.461498124	-0.537623961	-0.618313007	-0.697793905	-0.758412349	-0.834940659	-0.889327739	-0.926134584	-0.955284012	-0.974212231	-0.990485749	-0.986719438	-1.001514324	-0.976882805
0.068559185	0.275151567	0.503610345	0.708722364	0.765655154	0.701628875	0.529311831	0.479774531	0.671525058	0.909413686	1.05862232	1.068208763	0.999172027	0.953512566	0.955233113	0.955926838	0.951505928	0.950949254	1.019356439	1.07405631	1.056997251	0.917727083	0.68487974	0.485898755	0.526676465	0.700523084	0.766114986	0.708572275	0.515900318	0.274931109	0.081952653	0.006047898	-0.071430785	-0.274191066	-0.50602251	-0.70975466	-0.781454191	-0.708314544	-0.532388317	-0.463673119	-0.677433551	-0.913158792	-1.051508672	-1.069380646	-1.00770549	-0.960040054	-0.947061067	-0.94264224	-0.94620486	-0.954430333
0.194714992	0.360422769	0.496266499	0.603812846	0.670010001	0.68884485	0.713680918	0.698555673	0.713937837	0.733281654	0.776510309	0.848457791	0.903581798	0.955306248	0.99118059	1.007751354	1.008777294	0.957924573	0.905947367	0.845153415	0.795384091	0.747600114	0.743817387	0.717870877	0.719644836	0.708571747	0.663777295	0.605753711	0.504353086	0.367137036	0.205837903	0.008734041	-0.177660602	-0.354676391	-0.503338348	-0.594753421	-0.639841797	-0.664119311	-0.680565304	-0.66059077	-0.671751676	-0.671377768	-0.714147592	-0.763675613	-0.811332762	-0.86383275	-0.881918667	-0.901523003	-0.896028938	-0.857753897
0.10427829	0.204853775	0.303310142	0.385721139	0.467776829	0.54742754	0.634645904	0.721234973	0.776254039	0.824322637	0.881984192	0.920625283	0.944661973	0.969941635	0.979845	0.986830478	0.981647925	0.976472367	0.974488455	0.93026505	0.876748026	0.833772178	0.757613944	0.711287748	0.631325286	0.552884217	0.469574217	0.384276771	0.289231165	0.211345389	0.113412748	0.006055175	-0.092686986	-0.209869089	-0.28966704	-0.38792407	-0.463834363	-0.553362439	-0.631691178	-0.695265791	-0.772182673	-0.838258998	-0.885437156	-0.936927342	-0.961048909	-0.978648267	-0.980684061	-1.007776549	-1.006267374	-0.982582506
0.103433372	0.192696396	0.294962728	0.382753609	0.475989553	0.556202794	0.631325156	0.705360144	0.771900265	0.829777416	0.874310756	0.921869236	0.957565001	0.986183515	0.994990585	1.000759994	0.99745562	0.987083235	0.961538591	0.925655631	0.886727792	0.835261143	0.774570158	0.701215994	0.63473723	0.564205161	0.474313608	0.381277582	0.302752074	0.192757029	0.104253934	0.001695649	-0.099218398	-0.186561617	-0.283566561	-0.381001847	-0.470086515	-0.560409803	-0.635361678	-0.712569141	-0.77449136	-0.837286333	-0.886793217	-0.924726709	-0.951624228	-0.980987254	-0.994727047	-0.998760022	-0.996453044	-0.979940396
0.102274133	0.193004725	0.286106209	0.387854186	0.474847126	0.556020117	0.640862472	0.704885224	0.773390107	0.838283469	0.880036261	0.922261533	0.949592776	0.988606847	0.999487089	0.994437426	0.989115772	0.985909147	0.963426566	0.924740117	0.888259115	0.840269362	0.775149788	0.712921747	0.639712471	0.557463121	0.46320746	0.391016425	0.293856381	0.18892048	0.099067139	-0.006898912	-0.087366278	-0.196907152	-0.279843235	-0.386248437	-0.472213552	-0.5459234	-0.638728049	-0.706037055	-0.775726593	-0.822372439	-0.873795394	-0.916377761	-0.958749888	-0.994278936	-0.991432212	-0.997672049	-1.00208966	-0.969055692
0.23571268	0.424392659	0.583165339	0.688572347	0.739764919	0.744757733	0.729366209	0.705229939	0.683848515	0.693403835	0.718329744	0.78225385	0.866071903	0.930852142	0.988909949	1.001123767	0.983075065	0.938046675	0.867201679	0.789868485	0.741352406	0.702274291	0.702914429	0.707661983	0.737756503	0.743031534	0.757403051	0.687031914	0.580288422	0.427321992	0.231921627	0.001489096	-0.219467042	-0.418377203	-0.556344579	-0.657002839	-0.700459672	-0.708489785	-0.704541863	-0.666106258	-0.637422362	-0.637301553	-0.6626799	-0.724297402	-0.773564517	-0.83280513	-0.873923118	-0.895100529	-0.881275345	-0.820980921
0.22760498	0.407809164	0.572395527	0.679589966	0.742252368	0.743612247	0.70926652	0.695448715	0.69348136	0.681605001	0.710282176	0.782880087	0.860382785	0.922389653	0.997308164	1.008685483	0.970954473	0.926039336	0.884846783	0.80826207	0.74063594	0.702923449	0.688412887	0.708700235	0.732498091	0.760545571	0.738138616	0.689522662	0.581824545	0.430709508	0.229687974	0.008389056	-0.219624037	-0.41115437	-0.547217494	-0.656796007	-0.710199925	-0.710749564	-0.690853604	-0.654967514	-0.616838836	-0.639349291	-0.665371964	-0.717164564	-0.780285151	-0.826948915	-0.879218296	-0.896623843	-0.874670065	-0.847170534
0.067319844	0.249287025	0.464846065	0.647655281	0.719932383	0.641838965	0.468878045	0.392522044	0.578238062	0.802033376	0.919589975	0.934834799	0.855078149	0.795691759	0.789817214	0.781863624	0.790352832	0.797830517	0.854448262	0.930694551	0.923720225	0.804462386	0.585518617	0.394393527	0.456107092	0.634561988	0.702927031	0.656030639	0.462132394	0.250135417	0.072257191	-0.006938685	-0.064704743	-0.244399544	-0.455910868	-0.635049534	-0.716539127	-0.641238039	-0.462381826	-0.392147813	-0.585492583	-0.803615146	-0.913762528	-0.928253889	-0.846433106	-0.797089693	-0.779735221	-0.786864281	-0.787249564	-0.786976136
0.102031124	0.188598807	0.291482758	0.381737114	0.480723414	0.555428824	0.645134079	0.706149721	0.780454962	0.843513203	0.892029652	0.94482732	0.982720216	1.00330568	1.011834562	1.034013396	1.031325756	1.007808272	1.00021524	0.95563298	0.923154769	0.86053408	0.810309498	0.728132194	0.675258789	0.596635462	0.501074774	0.41731915	0.290484981	0.216849929	0.096917012	0.008032732	-0.107730064	-0.215812348	-0.317334271	-0.40561617	-0.500711293	-0.58851573	-0.679811715	-0.764461372	-0.845732525	-0.907940032	-0.961586319	-1.01868344	-1.045698625	-1.070781249	-1.090463494	-1.100995315	-1.114398051	-1.084316795
0.049000342	0.184527256	0.359209858	0.508774117	0.581346872	0.552468832	0.430000587	0.249550279	0.068123667	0.057172599	0.085860894	0.009152089	0.134419584	0.309342327	0.439074811	0.491091018	0.446003803	0.311691532	0.137058798	0.010057841	0.09008373	0.05697291	0.064434559	0.24552352	0.427633719	0.561018768	0.578692034	0.51017717	0.35677814	0.185727403	0.052379034	-0.003129049	-0.044673098	-0.18185583	-0.356451976	-0.50851018	-0.583127786	-0.55823625	-0.432993646	-0.25674164	-0.073918895	-0.056792256	-0.093195891	-0.013091596	-0.134695773	-0.30683827	-0.44530685	-0.491813483	-0.442024958	-0.309621209
0.093517025	0.179787275	0.293024624	0.374215548	0.47672541	0.551486345	0.645935244	0.697242593	0.774388193	0.833103028	0.872510806	0.926944303	0.969186788	0.982816288	0.983692802	0.987984563	0.988909386	0.988590849	0.965063082	0.92882183	0.880783756	0.823556563	0.77600507	0.70541902	0.488777954	0.56316166	0.476447313	0.375701255	0.289352872	0.192619245	0.107219262	-0.001403437	-0.090172281	-0.203051192	-0.284480549	-0.382000618	-0.465825076	-0.556036195	-0.633633267	-0.710006068	-0.78921978	-0.835575961	-0.872468473	-0.922965162	-0.966062824	-0.981959813	-1.005390166	-1.002308606	-1.006846289	-0.981719697
0.078387716	0.191516806	0.295568238	0.405483061	0.463537168	0.56005192	0.627867886	0.717520841	0.764948347	0.829654217	0.876751164	0.921946956	0.957967621	0.976132786	0.980752199	0.989739469	1.001962628	0.986535216	0.95624617	0.927578179	0.885959759	0.835230932	0.7674139	0.710760154	1.043294835	0.565269202	0.473227906	0.395904521	0.290693057	0.190322517	0.106693615	0.017088037	-0.099284556	-0.201291574	-0.27701454	-0.390126549	-0.477630139	-0.558242155	-0.63607585	-0.714065992	-0.77705282	-0.833237062	-0.868643965	-0.920400476	-0.959736392	-0.980096313	-0.98043364	-0.992489675	-0.99726717	-0.985811385
0.084432218	0.192188438	0.291959371	0.378924003	0.485612004	0.569083695	0.645945406	0.701104474	0.788456295	0.835425545	0.88912361	0.927997766	0.957007663	0.985622925	0.993157779	0.990100733	1.002731076	0.973305938	0.965538122	0.931163131	0.8765272	0.828132534	0.7737045	0.696444299	0.449226265	0.553330414	0.473860041	0.378415833	0.306772114	0.18940377	0.101050583	0.001693299	-0.094841369	-0.189862576	-0.288593828	-0.374366136	-0.473726622	-0.560858186	-0.639854093	-0.702183014	-0.786242803	-0.82432396	-0.865474868	-0.928529524	-0.966396143	-0.98681265	-0.997814127	-1.001872614	-0.987570223	-0.985369773
0.091842296	0.20860696	0.277339153	0.383928952	0.475536153	0.565739908	0.639308934	0.706911879	0.786559076	0.852127025	0.888636094	0.943265225	0.977669662	0.989153727	1.005748518	1.009856452	1.013302256	1.018776609	0.993617522	0.948054417	0.910607037	0.865251808	0.813293992	0.734699959	0.645086797	0.576478935	0.514972352	0.403847052	0.302509678	0.206765406	0.114612396	0.009397962	-0.103096194	-0.204463439	-0.309335489	-0.413642987	-0.491921701	-0.59533872	-0.681210116	-0.764057922	-0.835056163	-0.877216081	-0.943990511	-0.99282001	-1.040260677	-1.060513535	-1.078429632	-1.076293664	-1.085261489	-1.06512151
0.093590681	0.192185277	0.294629321	0.398851152	0.474908291	0.56456099	0.648662044	0.710059743	0.788937031	0.847882986	0.892463602	0.939395931	0.987859067	0.997453135	1.017437426	1.030019169	1.020817447	0.994598138	0.981304414	0.939036508	0.909062239	0.854828826	0.787038772	0.723338109	0.658269265	0.574247804	0.491254056	0.410158785	0.301107395	0.186593453	0.106222542	0.001519579	-0.112889382	-0.208494613	-0.303180395	-0.409737529	-0.504543218	-0.583412744	-0.668209517	-0.743919582	-0.818431049	-0.881545365	-0.939073277	-0.985916482	-1.019644917	-1.048221478	-1.070659003	-1.065808362	-1.073447896	-1.068862493
0.092526579	0.186137253	0.300971357	0.381304035	0.480004582	0.560045353	0.636718677	0.726629992	0.789037388	0.841229322	0.896968321	0.945049452	0.984741923	1.016018934	1.032290802	1.021029714	1.026838904	1.01641342	0.991367907	0.95669042	0.927001474	0.879249382	0.810332635	0.740328908	0.663457178	0.591642517	0.480772099	0.414146002	0.305127915	0.203948031	0.098214517	0.00390609	-0.104137158	-0.201772001	-0.309689133	-0.414521144	-0.49896667	-0.603758274	-0.682907608	-0.760100004	-0.829087718	-0.904303679	-0.958208167	-1.01537085	-1.059876409	-1.083141736	-1.08281776	-1.113563147	-1.100399247	-1.085992624
0.09729568	0.181648143	0.296751129	0.374358557	0.47441239	0.54915161	0.626451258	0.714098963	0.771854999	0.841409118	0.905119984	0.933282817	0.969895693	1.001003376	1.019888319	1.016350848	1.017880383	1.006278795	0.988632649	0.959947683	0.912792039	0.855012233	0.813492068	0.728163989	0.653294681	0.57302572	0.494827172	0.405914924	0.314138896	0.203845066	0.110840071	-0.002384655	-0.100498254	-0.204042184	-0.286894096	-0.404391511	-0.493686075	-0.586505017	-0.676307565	-0.752872737	-0.827848588	-0.867315084	-0.94438367	-0.980868466	-1.017741721	-1.051311953	-1.068320921	-1.076151421	-1.072520021	-1.056099104
0.092606894	0.206860186	0.29074359	0.385991745	0.471256189	0.542705876	0.638397465	0.709467322	0.771715023	0.834742679	0.873027993	0.935363075	0.957389727	0.988898353	0.993708138	1.003798845	0.986061788	0.979795589	0.95341487	0.920237175	0.875880399	0.839596329	0.762576045	0.723165138	0.6374718	0.55274289	0.478743575	0.391602023	0.293951877	0.184980283	0.132365827	0.020307222	-0.0903516	-0.198627914	-0.300612768	-0.388434965	-0.471324322	-0.554227758	-0.647654	-0.706636095	-0.781289512	-0.832093862	-0.869869251	-0.930146076	-0.956849221	-0.984014724	-1.003588727	-0.996238649	-0.983872981	-0.981651711
0.093503342	0.199041701	0.293343474	0.37924916	0.460097692	0.554803227	0.637288071	0.700693937	0.780782047	0.835295783	0.8824724	0.917422201	0.951716303	0.983125778	0.999781789	0.999431933	0.989597712	0.980423132	0.956926338	0.927721289	0.895172809	0.829098186	0.775737536	0.706213216	0.634335378	0.553616576	0.473134213	0.383960791	0.280503712	0.199320468	0.112632983	-0.001487004	-0.105579524	-0.188050889	-0.291004637	-0.38244023	-0.475285513	-0.544141904	-0.629921115	-0.724027187	-0.767563824	-0.831455117	-0.878359848	-0.913652895	-0.967356814	-0.969122693	-0.996933901	-0.985592986	-0.996696995	-0.983542955
0.09434456	0.203462361	0.299136711	0.37388818	0.479800176	0.555182367	0.64330175	0.713045735	0.774466397	0.838269562	0.899983392	0.945258562	0.980413814	1.007894801	1.026635009	1.032427645	1.018466109	1.016237659	0.996401771	0.965272858	0.914484033	0.867711555	0.807043111	0.734514307	0.666172162	0.580134246	0.49146967	0.396875612	0.296591338	0.215375338	0.090149248	0.002802133	-0.104924469	-0.212106301	-0.310246241	-0.407140315	-0.488044419	-0.580876305	-0.677324789	-0.762424084	-0.838277208	-0.894406218	-0.947613338	-0.995271048	-1.03360345	-1.071589554	-1.064020354	-1.083539192	-1.073971638	-1.064310674
0.112477897	0.197962993	0.274737039	0.390924954	0.495199625	0.560307549	0.652775398	0.72494067	0.774543936	0.83931544	0.88850025	0.969235951	0.981544736	0.999674008	1.027266928	1.02924019	1.027494574	1.020078956	0.991048629	0.969136078	0.914292749	0.872318648	0.802565213	0.741328145	0.671160929	0.586760994	0.481215624	0.410879008	0.305323986	0.211576184	0.097315409	0.00973227	-0.106920122	-0.205428945	-0.30100508	-0.41566988	-0.49976214	-0.585839855	-0.680306495	-0.748496943	-0.833047298	-0.899871921	-0.944106987	-0.992163855	-1.038789414	-1.053546122	-1.079873129	-1.084980315	-1.077999152	-1.066184468
0.061376877	0.246585462	0.480518113	0.662213442	0.727777275	0.665314061	0.487886933	0.425847378	0.617070646	0.852671747	0.970522413	0.978661886	0.904835579	0.844308231	0.83761228	0.848435466	0.840012167	0.850463356	0.904672759	0.975496745	0.975598471	0.856604496	0.621610376	0.432375549	0.488059809	0.661644329	0.743837024	0.662957948	0.48235593	0.259580652	0.074148612	-0.000971698	-0.062746942	-0.247162672	-0.47848561	-0.660804659	-0.73906217	-0.669226394	-0.493441758	-0.419430174	-0.611086583	-0.84413863	-0.964114086	-0.979693114	-0.900562859	-0.851580215	-0.838083275	-0.848505186	-0.834016834	-0.851062069
0.088646922	0.198679676	0.285532621	0.380482595	0.465655856	0.558557815	0.636123806	0.704416172	0.765481533	0.823988069	0.885921862	0.914134072	0.952676162	0.971612188	1.002895323	0.988085128	0.996721711	0.981179425	0.956265584	0.924377557	0.883191316	0.83434793	0.772322748	0.709975064	0.634835562	0.553745668	0.47546045	0.386814637	0.289842835	0.199417245	0.098130115	-0.003339727	-0.098980201	-0.202268497	-0.283307874	-0.379115561	-0.476990013	-0.551916308	-0.638067327	-0.713815232	-0.782465539	-0.83580003	-0.885071935	-0.925930758	-0.954346816	-0.988361946	-0.991544958	-1.000440628	-0.997285489	-0.979203804
0.232060642	0.420213821	0.570864137	0.663591535	0.721585748	0.721636522	0.71908447	0.698274756	0.681151822	0.700359188	0.737494578	0.796021538	0.865585485	0.934502998	0.980652548	1.004261491	0.984126503	0.928783728	0.878146919	0.812747258	0.767628843	0.714956211	0.703015096	0.717786482	0.73295836	0.764664993	0.72763955	0.682872084	0.556243705	0.416988687	0.206838293	-0.00306531	-0.203316102	-0.408561168	-0.548355403	-0.647930859	-0.704547524	-0.702254179	-0.68587765	-0.647680672	-0.644363978	-0.647520157	-0.668736361	-0.714840839	-0.778618052	-0.844324214	-0.893316598	-0.887070443	-0.890799841	-0.827420962
0.06788495	0.233580644	0.454683972	0.629521169	0.69670575	0.61141231	0.441869907	0.367108708	0.555101992	0.771715179	0.877682364	0.887600871	0.813729122	0.748368507	0.737264642	0.740323281	0.732658372	0.763741433	0.819433266	0.883866024	0.889930979	0.779179667	0.558393794	0.368468477	0.44529398	0.611495894	0.693594028	0.641914543	0.453561099	0.24128607	0.067144276	-0.000924554	-0.065533724	-0.234435766	-0.455704601	-0.639597435	-0.702840011	-0.61963437	-0.441900438	-0.374560294	-0.550132967	-0.773286623	-0.900370861	-0.886465007	-0.805390366	-0.752941766	-0.723796689	-0.73146725	-0.738922327	-0.751244575
0.096920141	0.196576958	0.291211092	0.376720155	0.479112305	0.547023448	0.633487416	0.700278571	0.773321308	0.83423132	0.888293785	0.91300232	0.959587162	0.977658797	1.005508763	1.010171418	1.001092615	0.992667117	0.95661294	0.936843031	0.894028909	0.830541519	0.771642031	0.722962024	0.631844938	0.566076122	0.469717694	0.38803643	0.286325659	0.207023147	0.107863434	0.010625403	-0.094536973	-0.184744411	-0.293360982	-0.385772231	-0.456674517	-0.541595671	-0.622951872	-0.711942035	-0.759762223	-0.844433755	-0.887700159	-0.909635835	-0.944519573	-0.970626856	-1.003138259	-0.996101735	-0.975668526	-0.979161418
0.103913702	0.204738288	0.266026329	0.395524111	0.467357571	0.564967143	0.637096541	0.685866246	0.752253768	0.791709691	0.865342481	0.928133924	0.955327188	0.986076746	0.995519434	0.994460549	0.986761125	0.961032068	0.948328211	0.919292841	0.88038265	0.81987495	0.776135977	0.704409113	0.647306933	0.553212247	0.451674939	0.392612791	0.277923543	0.204613123	0.100854946	-0.007798342	-0.097182585	-0.190100634	-0.306440551	-0.382316497	-0.468729198	-0.544890294	-0.637576749	-0.717635972	-0.779050784	-0.833969891	-0.869395979	-0.936775138	-0.962784743	-0.98512919	-0.992353421	-1.003037756	-1.010262907	-0.981365269
0.088427489	0.195425347	0.293069459	0.392225196	0.471127561	0.551680981	0.627746629	0.704194172	0.784892222	0.821558368	0.879953094	0.922075339	0.962282658	0.97824621	1.002504181	0.995008337	0.996348346	0.991493214	0.968891747	0.924777007	0.889580398	0.842288238	0.765672399	0.70825955	1.121803197	0.564789319	0.4643471	0.384086461	0.285812205	0.197780828	0.103524952	0.008924877	-0.101892518	-0.19651109	-0.288007001	-0.388585213	-0.471015795	-0.54879962	-0.629628373	-0.710265854	-0.769056639	-0.833370379	-0.886407889	-0.921727112	-0.958471838	-0.97583437	-1.004995041	-0.999420961	-0.994404597	-0.981846086
0.097585805	0.196018457	0.289245066	0.394056367	0.469640793	0.550327762	0.632327871	0.711503596	0.76970486	0.841100483	0.878650634	0.911074472	0.954832705	0.994615465	0.99633023	1.004154584	1.002814661	0.98301564	0.954229548	0.926641195	0.881336033	0.834881134	0.768838474	0.713255374	0.628272892	0.558776993	0.475967193	0.39392704	0.283357361	0.200647154	0.108283382	0.004941288	-0.101024099	-0.197715914	-0.293960933	-0.384550313	-0.463543675	-0.551107979	-0.629681055	-0.69470671	-0.768926724	-0.833340087	-0.886528631	-0.930388885	-0.956617698	-0.989338499	-0.997492746	-1.00620416	-0.991345726	-0.980775309
[truncated: 635 more rows]
[truncated: 590 more columns]
