# Supplementary material for: An Improved Power Quality Disturbance Detection Using Deep Learning Approach
Source: Hindawi journal article supplement (doi:10.1155/2022/7020979), 2022-05-21
Supplement: f1 [file 7020979.f1.zip › 7020979.f1/xodb_test.txt]

0.097967609	0.194992693	0.290141792	0.382499497	0.471177254	0.555321913	0.634123934	0.706825181	0.77272621	0.831193	0.881663054	0.923650812	0.956752317	0.980649106	0.995111274	0.999999683	0.995267302	0.980959662	0.957214412	0.924260001	0.882413476	0.832077435	0.773736149	0.707950909	0.635354619	0.556645715	0.472581438	0.383970553	0.291665567	0.196554527	0.099552477	0.001592653	-0.096382494	-0.193430364	-0.288617281	-0.381027471	-0.469771875	-0.553996702	-0.632891641	-0.705697661	-0.77171431	-0.830306456	-0.880910396	-0.92303928	-0.956287795	-0.980336063	-0.994952721	-0.999997146	-0.995420806	-0.981267729
0.097967609	0.194992693	0.290141792	0.382499497	0.471177254	0.555321913	0.634123934	0.706825181	0.77272621	0.831193	0.881663054	0.923650812	0.956752317	0.980649106	0.995111274	0.999999683	0.995267302	0.980959662	0.957214412	0.924260001	0.882413476	0.832077435	0.773736149	0.707950909	0.635354619	0.556645715	0.472581438	0.383970553	0.291665567	0.196554527	0.099552477	0.001592653	-0.096382494	-0.193430364	-0.288617281	-0.381027471	-0.469771875	-0.553996702	-0.632891641	-0.705697661	-0.77171431	-0.830306456	-0.880910396	-0.92303928	-0.956287795	-0.980336063	-0.994952721	-0.999997146	-0.995420806	-0.981267729
0.223114169	0.422680144	0.579835479	0.684058922	0.734995692	0.742062793	0.721943278	0.694554152	0.678417602	0.686499203	0.723466237	0.784986239	0.859204729	0.930022745	0.981361973	1.001363425	0.985476854	0.93766444	0.8694033	0.796716892	0.735961712	0.699418493	0.691802817	0.708598491	0.736677116	0.757106533	0.749508062	0.69693336	0.590093676	0.429922004	0.227845035	0.003688025	-0.218303417	-0.414401967	-0.566162918	-0.663940413	-0.708394489	-0.709710622	-0.684786531	-0.653097082	-0.632223368	-0.634069852	-0.662595176	-0.713503573	-0.775879107	-0.835302695	-0.877670246	-0.89279562	-0.87695684	-0.833804471
0.240999953	0.437158148	0.560100795	0.607598435	0.602592733	0.582285981	0.582198974	0.622088661	0.699561021	0.793642314	0.876119201	0.925126304	0.93471193	0.916222269	0.891286414	0.880116967	0.890952414	0.91580571	0.934585582	0.925587367	0.87722251	0.795148205	0.701029538	0.623082402	0.582503274	0.582042525	0.602278044	0.607846847	0.561442178	0.439781778	0.244648338	0.004042687	-0.237339372	-0.434514624	-0.558738952	-0.607335862	-0.602903434	-0.582535135	-0.581905723	-0.621105253	-0.698097045	-0.792133213	-0.8750067	-0.924654449	-0.934830642	-0.916637163	-0.891624323	-0.880123147	-0.890622392	-0.915387591
0.097967609	0.194992693	0.290141792	0.382499497	0.471177254	0.555321913	0.634123934	0.706825181	0.77272621	0.831193	0.881663054	0.923650812	0.956752317	0.980649106	0.995111274	0.999999683	0.995267302	0.980959662	0.957214412	0.924260001	0.882413476	0.832077435	0.773736149	0.707950909	0.635354619	0.556645715	0.472581438	0.383970553	0.291665567	0.196554527	0.099552477	0.001592653	-0.096382494	-0.193430364	-0.288617281	-0.381027471	-0.469771875	-0.553996702	-0.632891641	-0.705697661	-0.77171431	-0.830306456	-0.880910396	-0.92303928	-0.956287795	-0.980336063	-0.994952721	-0.999997146	-0.995420806	-0.981267729
0.098159859	0.195757843	0.291849015	0.385499035	0.475793265	0.561845728	0.642807838	0.717876804	0.786303634	0.847400656	0.900548471	0.945202284	0.980897527	1.007254736	1.023983611	1.030886225	1.02785935	1.014895859	0.992085195	0.9596129	0.917759193	0.866896618	0.807486771	0.740076137	0.665291084	0.583832037	0.496466908	0.404023834	0.307383284	0.207469631	0.105242247	0.001686226	-0.102197192	-0.205400379	-0.306919194	-0.405762842	-0.500963651	-0.591586649	-0.676738846	-0.755578148	-0.82732178	-0.89125416	-0.94673413	-0.993201475	-1.030182659	-1.057295715	-1.074254254	-1.080870522	-1.077057502	-1.062830016
0.097967609	0.194992693	0.290141792	0.382499497	0.471177254	0.555321913	0.634123934	0.706825181	0.77272621	0.831193	0.881663054	0.923650812	0.956752317	0.980649106	0.995111274	0.999999683	0.995267302	0.980959662	0.957214412	0.924260001	0.882413476	0.832077435	0.773736149	0.707950909	0.635354619	0.556645715	0.472581438	0.383970553	0.291665567	0.196554527	0.099552477	0.001592653	-0.096382494	-0.193430364	-0.288617281	-0.381027471	-0.469771875	-0.553996702	-0.632891641	-0.705697661	-0.77171431	-0.830306456	-0.880910396	-0.92303928	-0.956287795	-0.980336063	-0.994952721	-0.999997146	-0.995420806	-0.981267729
0.049429689	0.1809406	0.34985309	0.498646169	0.576351184	0.555747677	0.442569804	0.273621688	0.104434543	0.009380141	0.030804441	0.046171162	0.194570443	0.363555674	0.495579452	0.545787359	0.497137025	0.366142011	0.197306161	0.04812274	0.030309842	0.010527516	0.10201105	0.270716374	0.440138778	0.554587764	0.576832448	0.500588088	0.352586051	0.183531981	0.050998376	1.34E-05	-0.047883267	-0.178359367	-0.347114678	-0.496684977	-0.575843264	-0.556882488	-0.444985709	-0.276526938	-0.10687305	-0.008207715	-0.031272358	-0.044238948	-0.191840303	-0.360959308	-0.493999687	-0.545760544	-0.49867226	-0.36871808
0.097967609	0.194992693	0.290141792	0.382499497	0.471177254	0.555321913	0.634123934	0.706825181	0.77272621	0.831193	0.881663054	0.923650812	0.956752317	0.980649106	0.995111274	0.999999683	0.995267302	0.980959662	0.957214412	0.924260001	0.882413476	0.832077435	0.773736149	0.707950909	0.635354619	0.556645715	0.472581438	0.383970553	0.291665567	0.196554527	0.099552477	0.001592653	-0.096382494	-0.193430364	-0.288617281	-0.381027471	-0.469771875	-0.553996702	-0.632891641	-0.705697661	-0.77171431	-0.830306456	-0.880910396	-0.92303928	-0.956287795	-0.980336063	-0.994952721	-0.999997146	-0.995420806	-0.981267729
0.097967609	0.194992693	0.290141792	0.382499497	0.471177254	0.555321913	0.634123934	0.706825181	0.77272621	0.831193	0.881663054	0.923650812	0.956752317	0.980649106	0.995111274	0.999999683	0.995267302	0.980959662	0.957214412	0.924260001	0.882413476	0.832077435	0.773736149	0.707950909	0.635354619	0.556645715	0.472581438	0.383970553	0.291665567	0.196554527	0.099552477	0.001592653	-0.096382494	-0.193430364	-0.288617281	-0.381027471	-0.469771875	-0.553996702	-0.632891641	-0.705697661	-0.77171431	-0.830306456	-0.880910396	-0.92303928	-0.956287795	-0.980336063	-0.994952721	-0.999997146	-0.995420806	-0.981267729
0.097967609	0.194992693	0.290141792	0.382499497	0.471177254	0.555321913	0.634123934	0.706825181	0.77272621	0.831193	0.881663054	0.923650812	0.956752317	0.980649106	0.995111274	0.999999683	0.995267302	0.980959662	0.957214412	0.924260001	0.882413476	0.832077435	0.773736149	0.707950909	0.294679619	0.556645715	0.472581438	0.383970553	0.291665567	0.196554527	0.099552477	0.001592653	-0.096382494	-0.193430364	-0.288617281	-0.381027471	-0.469771875	-0.553996702	-0.632891641	-0.705697661	-0.77171431	-0.830306456	-0.880910396	-0.92303928	-0.956287795	-0.980336063	-0.994952721	-0.999997146	-0.995420806	-0.981267729
0.097967609	0.194992693	0.290141792	0.382499497	0.471177254	0.555321913	0.634123934	0.706825181	0.77272621	0.831193	0.881663054	0.923650812	0.956752317	0.980649106	0.995111274	0.999999683	0.995267302	0.980959662	0.957214412	0.924260001	0.882413476	0.832077435	0.773736149	0.707950909	0.635354619	0.556645715	0.472581438	0.383970553	0.291665567	0.196554527	0.099552477	0.001592653	-0.096382494	-0.193430364	-0.288617281	-0.381027471	-0.469771875	-0.553996702	-0.632891641	-0.705697661	-0.77171431	-0.830306456	-0.880910396	-0.92303928	-0.956287795	-0.980336063	-0.994952721	-0.999997146	-0.995420806	-0.981267729
0.097967609	0.194992693	0.290141792	0.382499497	0.471177254	0.555321913	0.634123934	0.706825181	0.77272621	0.831193	0.881663054	0.923650812	0.956752317	0.980649106	0.995111274	0.999999683	0.995267302	0.980959662	0.957214412	0.924260001	0.882413476	0.832077435	0.773736149	0.707950909	0.635354619	0.556645715	0.472581438	0.383970553	0.291665567	0.196554527	0.099552477	0.001592653	-0.096382494	-0.193430364	-0.288617281	-0.381027471	-0.469771875	-0.553996702	-0.632891641	-0.705697661	-0.77171431	-0.830306456	-0.880910396	-0.92303928	-0.956287795	-0.980336063	-0.994952721	-0.999997146	-0.995420806	-0.981267729
0.097967609	0.194992693	0.290141792	0.382499497	0.471177254	0.555321913	0.634123934	0.706825181	0.77272621	0.831193	0.881663054	0.923650812	0.956752317	0.980649106	0.995111274	0.999999683	0.995267302	0.980959662	0.957214412	0.924260001	0.882413476	0.832077435	0.773736149	0.707950909	0.635354619	0.556645715	0.472581438	0.383970553	0.291665567	0.196554527	0.099552477	0.001592653	-0.096382494	-0.193430364	-0.288617281	-0.381027471	-0.469771875	-0.553996702	-0.632891641	-0.705697661	-0.77171431	-0.830306456	-0.880910396	-0.92303928	-0.956287795	-0.980336063	-0.994952721	-0.999997146	-0.995420806	-0.981267729
0.097967609	0.194992693	0.290141792	0.382499497	0.471177254	0.555321913	0.634123934	0.706825181	0.77272621	0.831193	0.881663054	0.923650812	0.956752317	0.980649106	0.995111274	0.999999683	0.995267302	0.980959662	0.957214412	0.924260001	0.882413476	0.832077435	0.773736149	0.707950909	0.969792119	0.556645715	0.472581438	0.383970553	0.291665567	0.196554527	0.099552477	0.001592653	-0.096382494	-0.193430364	-0.288617281	-0.381027471	-0.469771875	-0.553996702	-0.632891641	-0.705697661	-0.77171431	-0.830306456	-0.880910396	-0.92303928	-0.956287795	-0.980336063	-0.994952721	-0.999997146	-0.995420806	-0.981267729
0.098159859	0.195757843	0.291849015	0.385499035	0.475793265	0.561845728	0.642807838	0.717876804	0.786303634	0.847400656	0.900548471	0.945202284	0.980897527	1.007254736	1.023983611	1.030886225	1.02785935	1.014895859	0.992085195	0.9596129	0.917759193	0.866896618	0.807486771	0.740076137	0.665291084	0.583832037	0.496466908	0.404023834	0.307383284	0.207469631	0.105242247	0.001686226	-0.102197192	-0.205400379	-0.306919194	-0.405762842	-0.500963651	-0.591586649	-0.676738846	-0.755578148	-0.82732178	-0.89125416	-0.94673413	-0.993201475	-1.030182659	-1.057295715	-1.074254254	-1.080870522	-1.077057502	-1.062830016
0.097967609	0.194992693	0.290141792	0.382499497	0.471177254	0.555321913	0.634123934	0.706825181	0.77272621	0.831193	0.881663054	0.923650812	0.956752317	0.980649106	0.995111274	0.999999683	0.995267302	0.980959662	0.957214412	0.924260001	0.882413476	0.832077435	0.773736149	0.707950909	0.635354619	0.556645715	0.472581438	0.383970553	0.291665567	0.196554527	0.099552477	0.001592653	-0.096382494	-0.193430364	-0.288617281	-0.381027471	-0.469771875	-0.553996702	-0.632891641	-0.705697661	-0.77171431	-0.830306456	-0.880910396	-0.92303928	-0.956287795	-0.980336063	-0.994952721	-0.999997146	-0.995420806	-0.981267729
0.097967609	0.194992693	0.290141792	0.382499497	0.471177254	0.555321913	0.634123934	0.706825181	0.77272621	0.831193	0.881663054	0.923650812	0.956752317	0.980649106	0.995111274	0.999999683	0.995267302	0.980959662	0.957214412	0.924260001	0.882413476	0.832077435	0.773736149	0.707950909	0.635354619	0.556645715	0.472581438	0.383970553	0.291665567	0.196554527	0.099552477	0.001592653	-0.096382494	-0.193430364	-0.288617281	-0.381027471	-0.469771875	-0.553996702	-0.632891641	-0.705697661	-0.77171431	-0.830306456	-0.880910396	-0.92303928	-0.956287795	-0.980336063	-0.994952721	-0.999997146	-0.995420806	-0.981267729
0.097967609	0.194992693	0.290141792	0.382499497	0.471177254	0.555321913	0.634123934	0.706825181	0.77272621	0.831193	0.881663054	0.923650812	0.956752317	0.980649106	0.995111274	0.999999683	0.995267302	0.980959662	0.957214412	0.924260001	0.882413476	0.832077435	0.773736149	0.707950909	0.635354619	0.556645715	0.472581438	0.383970553	0.291665567	0.196554527	0.099552477	0.001592653	-0.096382494	-0.193430364	-0.288617281	-0.381027471	-0.469771875	-0.553996702	-0.632891641	-0.705697661	-0.77171431	-0.830306456	-0.880910396	-0.92303928	-0.956287795	-0.980336063	-0.994952721	-0.999997146	-0.995420806	-0.981267729
0.098107648	0.195552623	0.291396993	0.384715374	0.474603812	0.560188499	0.640634227	0.715152505	0.783009248	0.843531983	0.896116489	0.940232806	0.975430551	1.001343507	1.017693405	1.024292893	1.021047642	1.007957562	0.985117135	0.952714832	0.911031633	0.860438653	0.801393899	0.734438178	0.660190198	0.5793409	0.492647081	0.400924351	0.305039509	0.205902386	0.104457251	0.00167385	-0.101461842	-0.203957049	-0.304821739	-0.403078174	-0.497770378	-0.587973435	-0.672802533	-0.751421645	-0.823051782	-0.88697873	-0.942560187	-0.989232241	-1.02651511	-1.054018095	-1.071443694	-1.078590823	-1.075357123	-1.061740315
0.097967609	0.194992693	0.290141792	0.382499497	0.471177254	0.555321913	0.634123934	0.706825181	0.77272621	0.831193	0.881663054	0.923650812	0.956752317	0.980649106	0.995111274	0.999999683	0.995267302	0.980959662	0.957214412	0.924260001	0.882413476	0.832077435	0.773736149	0.707950909	0.635354619	0.556645715	0.472581438	0.383970553	0.291665567	0.196554527	0.099552477	0.001592653	-0.096382494	-0.193430364	-0.288617281	-0.381027471	-0.469771875	-0.553996702	-0.632891641	-0.705697661	-0.77171431	-0.830306456	-0.880910396	-0.92303928	-0.956287795	-0.980336063	-0.994952721	-0.999997146	-0.995420806	-0.981267729
0.098159859	0.195757843	0.291849015	0.385499035	0.475793265	0.561845728	0.642807838	0.717876804	0.786303634	0.847400656	0.900548471	0.945202284	0.980897527	1.007254736	1.023983611	1.030886225	1.02785935	1.014895859	0.992085195	0.9596129	0.917759193	0.866896618	0.807486771	0.740076137	0.665291084	0.583832037	0.496466908	0.404023834	0.307383284	0.207469631	0.105242247	0.001686226	-0.102197192	-0.205400379	-0.306919194	-0.405762842	-0.500963651	-0.591586649	-0.676738846	-0.755578148	-0.82732178	-0.89125416	-0.94673413	-0.993201475	-1.030182659	-1.057295715	-1.074254254	-1.080870522	-1.077057502	-1.062830016
0.097967609	0.194992693	0.290141792	0.382499497	0.471177254	0.555321913	0.634123934	0.706825181	0.77272621	0.831193	0.881663054	0.923650812	0.956752317	0.980649106	0.995111274	0.999999683	0.995267302	0.980959662	0.957214412	0.924260001	0.882413476	0.832077435	0.773736149	0.707950909	0.635354619	0.556645715	0.472581438	0.383970553	0.291665567	0.196554527	0.099552477	0.001592653	-0.096382494	-0.193430364	-0.288617281	-0.381027471	-0.469771875	-0.553996702	-0.632891641	-0.705697661	-0.77171431	-0.830306456	-0.880910396	-0.92303928	-0.956287795	-0.980336063	-0.994952721	-0.999997146	-0.995420806	-0.981267729
0.097967609	0.194992693	0.290141792	0.382499497	0.471177254	0.555321913	0.634123934	0.706825181	0.77272621	0.831193	0.881663054	0.923650812	0.956752317	0.980649106	0.995111274	0.999999683	0.995267302	0.980959662	0.957214412	0.924260001	0.882413476	0.832077435	0.773736149	0.707950909	0.635354619	0.556645715	0.472581438	0.383970553	0.291665567	0.196554527	0.099552477	0.001592653	-0.096382494	-0.193430364	-0.288617281	-0.381027471	-0.469771875	-0.553996702	-0.632891641	-0.705697661	-0.77171431	-0.830306456	-0.880910396	-0.92303928	-0.956287795	-0.980336063	-0.994952721	-0.999997146	-0.995420806	-0.981267729
0.218846949	0.414937231	0.570036558	0.673961041	0.726338905	0.736229698	0.719706114	0.695962743	0.682849006	0.692852814	0.730454855	0.791451973	0.864383751	0.93369613	0.983858168	1.00341465	0.987968079	0.941340666	0.874611846	0.803253354	0.743062929	0.70590922	0.696363959	0.7100932	0.734454926	0.751209087	0.740722345	0.686674237	0.580138288	0.42205413	0.223489299	0.003616524	-0.214126355	-0.406803344	-0.556578955	-0.65411222	-0.700011497	-0.704081472	-0.682608222	-0.654368371	-0.636314063	-0.639921914	-0.669002756	-0.719403566	-0.780584414	-0.838626467	-0.879916653	-0.894624683	-0.879160211	-0.837049343
0.097967609	0.194992693	0.290141792	0.382499497	0.471177254	0.555321913	0.634123934	0.706825181	0.77272621	0.831193	0.881663054	0.923650812	0.956752317	0.980649106	0.995111274	0.999999683	0.995267302	0.980959662	0.957214412	0.924260001	0.882413476	0.832077435	0.773736149	0.707950909	0.635354619	0.556645715	0.472581438	0.383970553	0.291665567	0.196554527	0.099552477	0.001592653	-0.096382494	-0.193430364	-0.288617281	-0.381027471	-0.469771875	-0.553996702	-0.632891641	-0.705697661	-0.77171431	-0.830306456	-0.880910396	-0.92303928	-0.956287795	-0.980336063	-0.994952721	-0.999997146	-0.995420806	-0.981267729
0.097967609	0.194992693	0.290141792	0.382499497	0.471177254	0.555321913	0.634123934	0.706825181	0.77272621	0.831193	0.881663054	0.923650812	0.956752317	0.980649106	0.995111274	0.999999683	0.995267302	0.980959662	0.957214412	0.924260001	0.882413476	0.832077435	0.773736149	0.707950909	0.635354619	0.556645715	0.472581438	0.383970553	0.291665567	0.196554527	0.099552477	0.001592653	-0.096382494	-0.193430364	-0.288617281	-0.381027471	-0.469771875	-0.553996702	-0.632891641	-0.705697661	-0.77171431	-0.830306456	-0.880910396	-0.92303928	-0.956287795	-0.980336063	-0.994952721	-0.999997146	-0.995420806	-0.981267729
0.098159859	0.195757843	0.291849015	0.385499035	0.475793265	0.561845728	0.642807838	0.717876804	0.786303634	0.847400656	0.900548471	0.945202284	0.980897527	1.007254736	1.023983611	1.030886225	1.02785935	1.014895859	0.992085195	0.9596129	0.917759193	0.866896618	0.807486771	0.740076137	0.665291084	0.583832037	0.496466908	0.404023834	0.307383284	0.207469631	0.105242247	0.001686226	-0.102197192	-0.205400379	-0.306919194	-0.405762842	-0.500963651	-0.591586649	-0.676738846	-0.755578148	-0.82732178	-0.89125416	-0.94673413	-0.993201475	-1.030182659	-1.057295715	-1.074254254	-1.080870522	-1.077057502	-1.062830016
0.097967609	0.194992693	0.290141792	0.382499497	0.471177254	0.555321913	0.634123934	0.706825181	0.77272621	0.831193	0.881663054	0.923650812	0.956752317	0.980649106	0.995111274	0.999999683	0.995267302	0.980959662	0.957214412	0.924260001	0.882413476	0.832077435	0.773736149	0.707950909	0.635354619	0.556645715	0.472581438	0.383970553	0.291665567	0.196554527	0.099552477	0.001592653	-0.096382494	-0.193430364	-0.288617281	-0.381027471	-0.469771875	-0.553996702	-0.632891641	-0.705697661	-0.77171431	-0.830306456	-0.880910396	-0.92303928	-0.956287795	-0.980336063	-0.994952721	-0.999997146	-0.995420806	-0.981267729
0.097967609	0.194992693	0.290141792	0.382499497	0.471177254	0.555321913	0.634123934	0.706825181	0.77272621	0.831193	0.881663054	0.923650812	0.956752317	0.980649106	0.995111274	0.999999683	0.995267302	0.980959662	0.957214412	0.924260001	0.882413476	0.832077435	0.773736149	0.707950909	0.635354619	0.556645715	0.472581438	0.383970553	0.291665567	0.196554527	0.099552477	0.001592653	-0.096382494	-0.193430364	-0.288617281	-0.381027471	-0.469771875	-0.553996702	-0.632891641	-0.705697661	-0.77171431	-0.830306456	-0.880910396	-0.92303928	-0.956287795	-0.980336063	-0.994952721	-0.999997146	-0.995420806	-0.981267729
0.097967609	0.194992693	0.290141792	0.382499497	0.471177254	0.555321913	0.634123934	0.706825181	0.77272621	0.831193	0.881663054	0.923650812	0.956752317	0.980649106	0.995111274	0.999999683	0.995267302	0.980959662	0.957214412	0.924260001	0.882413476	0.832077435	0.773736149	0.707950909	0.635354619	0.556645715	0.472581438	0.383970553	0.291665567	0.196554527	0.099552477	0.001592653	-0.096382494	-0.193430364	-0.288617281	-0.381027471	-0.469771875	-0.553996702	-0.632891641	-0.705697661	-0.77171431	-0.830306456	-0.880910396	-0.92303928	-0.956287795	-0.980336063	-0.994952721	-0.999997146	-0.995420806	-0.981267729
0.098159859	0.195757843	0.291849015	0.385499035	0.475793265	0.561845728	0.642807838	0.717876804	0.786303634	0.847400656	0.900548471	0.945202284	0.980897527	1.007254736	1.023983611	1.030886225	1.02785935	1.014895859	0.992085195	0.9596129	0.917759193	0.866896618	0.807486771	0.740076137	0.665291084	0.583832037	0.496466908	0.404023834	0.307383284	0.207469631	0.105242247	0.001686226	-0.102197192	-0.205400379	-0.306919194	-0.405762842	-0.500963651	-0.591586649	-0.676738846	-0.755578148	-0.82732178	-0.89125416	-0.94673413	-0.993201475	-1.030182659	-1.057295715	-1.074254254	-1.080870522	-1.077057502	-1.062830016
0.097967609	0.194992693	0.290141792	0.382499497	0.471177254	0.555321913	0.634123934	0.706825181	0.77272621	0.831193	0.881663054	0.923650812	0.956752317	0.980649106	0.995111274	0.999999683	0.995267302	0.980959662	0.957214412	0.924260001	0.882413476	0.832077435	0.773736149	0.707950909	0.635354619	0.556645715	0.472581438	0.383970553	0.291665567	0.196554527	0.099552477	0.001592653	-0.096382494	-0.193430364	-0.288617281	-0.381027471	-0.469771875	-0.553996702	-0.632891641	-0.705697661	-0.77171431	-0.830306456	-0.880910396	-0.92303928	-0.956287795	-0.980336063	-0.994952721	-0.999997146	-0.995420806	-0.981267729
0.097967609	0.194992693	0.290141792	0.382499497	0.471177254	0.555321913	0.634123934	0.706825181	0.77272621	0.831193	0.881663054	0.923650812	0.956752317	0.980649106	0.995111274	0.999999683	0.995267302	0.980959662	0.957214412	0.924260001	0.882413476	0.832077435	0.773736149	0.707950909	1.118667119	0.556645715	0.472581438	0.383970553	0.291665567	0.196554527	0.099552477	0.001592653	-0.096382494	-0.193430364	-0.288617281	-0.381027471	-0.469771875	-0.553996702	-0.632891641	-0.705697661	-0.77171431	-0.830306456	-0.880910396	-0.92303928	-0.956287795	-0.980336063	-0.994952721	-0.999997146	-0.995420806	-0.981267729
0.098159859	0.195757843	0.291849015	0.385499035	0.475793265	0.561845728	0.642807838	0.717876804	0.786303634	0.847400656	0.900548471	0.945202284	0.980897527	1.007254736	1.023983611	1.030886225	1.02785935	1.014895859	0.992085195	0.9596129	0.917759193	0.866896618	0.807486771	0.740076137	0.665291084	0.583832037	0.496466908	0.404023834	0.307383284	0.207469631	0.105242247	0.001686226	-0.102197192	-0.205400379	-0.306919194	-0.405762842	-0.500963651	-0.591586649	-0.676738846	-0.755578148	-0.82732178	-0.89125416	-0.94673413	-0.993201475	-1.030182659	-1.057295715	-1.074254254	-1.080870522	-1.077057502	-1.062830016
0.171374446	0.31939544	0.429119597	0.498957052	0.540179057	0.571353261	0.610210574	0.666461085	0.738537548	0.815421537	0.882434697	0.928176781	0.949410505	0.951769985	0.94618166	0.942893776	0.946088205	0.951710675	0.949574134	0.928712852	0.883368305	0.816626789	0.73978568	0.667524043	0.61097344	0.57188251	0.540711628	0.499810054	0.4305565	0.321505616	0.174019049	0.002849706	-0.168723495	-0.317274865	-0.427671889	-0.498096343	-0.53964386	-0.570826225	-0.609452554	-0.665402517	-0.737290766	-0.814213606	-0.881495293	-0.927634045	-0.94924178	-0.951827217	-0.946275865	-0.942895678	-0.945995535	-0.95164934
0.258943264	0.467468535	0.593717268	0.635295198	0.61817431	0.584394797	0.57409603	0.609643704	0.68843012	0.786898382	0.873322769	0.923122226	0.929641043	0.905708444	0.87573179	0.862510202	0.87533515	0.905198751	0.929438822	0.92356302	0.87446914	0.788481146	0.689954514	0.610618002	0.57427969	0.58394904	0.617637864	0.635384753	0.595031859	0.470223385	0.26285011	0.004350245	-0.255022705	-0.464691324	-0.592379714	-0.635189809	-0.618706416	-0.584847156	-0.573925032	-0.608681284	-0.686911098	-0.785312274	-0.872166327	-0.922669571	-0.92983497	-0.906216584	-0.876133164	-0.862517495	-0.874943321	-0.904687621
0.039227358	0.14478493	0.284340252	0.416116868	0.502761442	0.523652213	0.481514557	0.401128577	0.320578328	0.278004906	0.298340266	0.384505112	0.516050404	0.655714319	0.761699383	0.801546048	0.762938819	0.657810929	0.518367033	0.386361622	0.299238717	0.277792347	0.319492556	0.399711683	0.480423613	0.523431107	0.503650958	0.417967223	0.286655782	0.146886105	0.04047575	1.06E-05	-0.037996904	-0.142692929	-0.28202257	-0.414254238	-0.501854066	-0.523856208	-0.482595119	-0.402545425	-0.321674407	-0.278234544	-0.297459695	-0.382660945	-0.513736018	-0.653608623	-0.76044206	-0.801524823	-0.764160265	-0.659898279
0.05373247	0.194796003	0.369657858	0.509687303	0.554768813	0.474509702	0.28186966	0.095847109	0.292479162	0.487962051	0.5727415	0.535352188	0.41016262	0.26918566	0.197638671	0.191833139	0.197237191	0.267278428	0.407763181	0.533871545	0.573075058	0.490319688	0.296262165	0.096207297	0.278117084	0.472178055	0.554495161	0.511308768	0.372395757	0.197541901	0.05543216	1.46E-05	-0.052056555	-0.192059357	-0.366910587	-0.508040145	-0.555008481	-0.476810548	-0.285610715	-0.095706616	-0.28868436	-0.485574068	-0.572374745	-0.536808865	-0.412557334	-0.271113241	-0.198059529	-0.191832169	-0.196854641	-0.265391905
0.256793462	0.463837882	0.589692754	0.631983556	0.616318702	0.584157959	0.575086586	0.611157285	0.689787971	0.787731631	0.873683906	0.923389526	0.93027723	0.906998314	0.877626824	0.864651572	0.877237703	0.906499803	0.930084126	0.92383277	0.874825133	0.789305198	0.691305691	0.612133948	0.575284755	0.583736511	0.615808901	0.632092212	0.591010603	0.466577036	0.260669346	0.004313394	-0.252904047	-0.461076664	-0.588352241	-0.631859267	-0.616824206	-0.584585901	-0.574900885	-0.610192314	-0.688275524	-0.786154735	-0.872532714	-0.922934551	-0.930462121	-0.907495258	-0.878020579	-0.864658732	-0.876853293	-0.905999841
0.098159859	0.195757843	0.291849015	0.385499035	0.475793265	0.561845728	0.642807838	0.717876804	0.786303634	0.847400656	0.900548471	0.945202284	0.980897527	1.007254736	1.023983611	1.030886225	1.02785935	1.014895859	0.992085195	0.9596129	0.917759193	0.866896618	0.807486771	0.740076137	0.665291084	0.583832037	0.496466908	0.404023834	0.307383284	0.207469631	0.105242247	0.001686226	-0.102197192	-0.205400379	-0.306919194	-0.405762842	-0.500963651	-0.591586649	-0.676738846	-0.755578148	-0.82732178	-0.89125416	-0.94673413	-0.993201475	-1.030182659	-1.057295715	-1.074254254	-1.080870522	-1.077057502	-1.062830016
0.041168963	0.151713322	0.297075784	0.432638383	0.518580418	0.533063534	0.479312721	0.384219336	0.288948471	0.234726416	0.248607453	0.334026207	0.469329807	0.614796074	0.725784991	0.767603572	0.727085105	0.616987647	0.471732013	0.335913114	0.249449276	0.234363862	0.287641606	0.382554719	0.478000266	0.532691729	0.519412536	0.434518529	0.29947662	0.153909573	0.04247845	1.11E-05	-0.039878249	-0.149526474	-0.294672256	-0.430744751	-0.517728899	-0.533416819	-0.480613956	-0.385883905	-0.290266476	-0.235107454	-0.247785052	-0.332152857	-0.466930391	-0.61259519	-0.724466159	-0.767581285	-0.728366392	-0.619169724
0.097967609	0.194992693	0.290141792	0.382499497	0.471177254	0.555321913	0.634123934	0.706825181	0.77272621	0.831193	0.881663054	0.923650812	0.956752317	0.980649106	0.995111274	0.999999683	0.995267302	0.980959662	0.957214412	0.924260001	0.882413476	0.832077435	0.773736149	0.707950909	0.454392119	0.556645715	0.472581438	0.383970553	0.291665567	0.196554527	0.099552477	0.001592653	-0.096382494	-0.193430364	-0.288617281	-0.381027471	-0.469771875	-0.553996702	-0.632891641	-0.705697661	-0.77171431	-0.830306456	-0.880910396	-0.92303928	-0.956287795	-0.980336063	-0.994952721	-0.999997146	-0.995420806	-0.981267729
0.225993665	0.427904282	0.586444953	0.69086648	0.7408256	0.745980912	0.723427961	0.69357197	0.675389792	0.682169822	0.718705464	0.780576896	0.855663366	0.927497703	0.979631712	0.999933562	0.983749788	0.935137159	0.86584153	0.792259185	0.7311242	0.694995758	0.688686629	0.707557432	0.738151055	0.761067594	0.755424651	0.703849539	0.596808647	0.435230436	0.230784257	0.003736276	-0.221122079	-0.419528769	-0.572627439	-0.670566234	-0.71404015	-0.713492014	-0.686232904	-0.652209557	-0.629428105	-0.630082157	-0.658230246	-0.709480155	-0.77266186	-0.833018229	-0.876113355	-0.891520626	-0.875429112	-0.831573477
0.067182649	0.243820109	0.463797263	0.642864401	0.708997438	0.632441164	0.459441483	0.387883551	0.571721414	0.792869075	0.914844619	0.916710987	0.847033316	0.785398824	0.771793245	0.776379621	0.771852016	0.784798972	0.845763476	0.915948088	0.915781586	0.795812537	0.57561085	0.389140941	0.456645583	0.630131992	0.708893697	0.644991973	0.467258515	0.247263502	0.069308538	1.83E-05	-0.065086543	-0.240388553	-0.460324961	-0.64070614	-0.709062036	-0.634721784	-0.462259912	-0.386710139	-0.567836805	-0.789897258	-0.913874481	-0.917454205	-0.848306219	-0.786013353	-0.771739066	-0.776375683	-0.771915148	-0.784213781
0.098159859	0.195757843	0.291849015	0.385499035	0.475793265	0.561845728	0.642807838	0.717876804	0.786303634	0.847400656	0.900548471	0.945202284	0.980897527	1.007254736	1.023983611	1.030886225	1.02785935	1.014895859	0.992085195	0.9596129	0.917759193	0.866896618	0.807486771	0.740076137	0.665291084	0.583832037	0.496466908	0.404023834	0.307383284	0.207469631	0.105242247	0.001686226	-0.102197192	-0.205400379	-0.306919194	-0.405762842	-0.500963651	-0.591586649	-0.676738846	-0.755578148	-0.82732178	-0.89125416	-0.94673413	-0.993201475	-1.030182659	-1.057295715	-1.074254254	-1.080870522	-1.077057502	-1.062830016
0.098159859	0.195757843	0.291849015	0.385499035	0.475793265	0.561845728	0.642807838	0.717876804	0.786303634	0.847400656	0.900548471	0.945202284	0.980897527	1.007254736	1.023983611	1.030886225	1.02785935	1.014895859	0.992085195	0.9596129	0.917759193	0.866896618	0.807486771	0.740076137	0.665291084	0.583832037	0.496466908	0.404023834	0.307383284	0.207469631	0.105242247	0.001686226	-0.102197192	-0.205400379	-0.306919194	-0.405762842	-0.500963651	-0.591586649	-0.676738846	-0.755578148	-0.82732178	-0.89125416	-0.94673413	-0.993201475	-1.030182659	-1.057295715	-1.074254254	-1.080870522	-1.077057502	-1.062830016
0.097967609	0.194992693	0.290141792	0.382499497	0.471177254	0.555321913	0.634123934	0.706825181	0.77272621	0.831193	0.881663054	0.923650812	0.956752317	0.980649106	0.995111274	0.999999683	0.995267302	0.980959662	0.957214412	0.924260001	0.882413476	0.832077435	0.773736149	0.707950909	0.951942119	0.556645715	0.472581438	0.383970553	0.291665567	0.196554527	0.099552477	0.001592653	-0.096382494	-0.193430364	-0.288617281	-0.381027471	-0.469771875	-0.553996702	-0.632891641	-0.705697661	-0.77171431	-0.830306456	-0.880910396	-0.92303928	-0.956287795	-0.980336063	-0.994952721	-0.999997146	-0.995420806	-0.981267729
0.045275805	0.166310381	0.323688999	0.466595644	0.549840623	0.548964726	0.468338225	0.339532822	0.210520762	0.129344601	0.127763263	0.210388031	0.352973206	0.510443032	0.631957272	0.677946725	0.63338557	0.512833331	0.355549365	0.212324313	0.12846078	0.128630938	0.208705638	0.337301132	0.466516589	0.548240256	0.550526722	0.468523809	0.32626316	0.168705571	0.046714349	1.23E-05	-0.043857785	-0.163925026	-0.321110896	-0.464651285	-0.5491317	-0.549667562	-0.470146791	-0.341764456	-0.212348863	-0.130079857	-0.127088593	-0.208468024	-0.3504011	-0.508043002	-0.630508514	-0.67792219	-0.634793281	-0.515213688
0.097967609	0.194992693	0.290141792	0.382499497	0.471177254	0.555321913	0.634123934	0.706825181	0.77272621	0.831193	0.881663054	0.923650812	0.956752317	0.980649106	0.995111274	0.999999683	0.995267302	0.980959662	0.957214412	0.924260001	0.882413476	0.832077435	0.773736149	0.707950909	1.025629619	0.556645715	0.472581438	0.383970553	0.291665567	0.196554527	0.099552477	0.001592653	-0.096382494	-0.193430364	-0.288617281	-0.381027471	-0.469771875	-0.553996702	-0.632891641	-0.705697661	-0.77171431	-0.830306456	-0.880910396	-0.92303928	-0.956287795	-0.980336063	-0.994952721	-0.999997146	-0.995420806	-0.981267729
0.097967609	0.194992693	0.290141792	0.382499497	0.471177254	0.555321913	0.634123934	0.706825181	0.77272621	0.831193	0.881663054	0.923650812	0.956752317	0.980649106	0.995111274	0.999999683	0.995267302	0.980959662	0.957214412	0.924260001	0.882413476	0.832077435	0.773736149	0.707950909	1.128979619	0.556645715	0.472581438	0.383970553	0.291665567	0.196554527	0.099552477	0.001592653	-0.096382494	-0.193430364	-0.288617281	-0.381027471	-0.469771875	-0.553996702	-0.632891641	-0.705697661	-0.77171431	-0.830306456	-0.880910396	-0.92303928	-0.956287795	-0.980336063	-0.994952721	-0.999997146	-0.995420806	-0.981267729
0.276384716	0.496915429	0.626336658	0.662093946	0.633114142	0.586154571	0.565857889	0.59713357	0.677165964	0.779880086	0.870126141	0.920675702	0.924186899	0.894935	0.860036141	0.844811223	0.859578346	0.89433434	0.92391046	0.921096411	0.871314095	0.781537325	0.678744297	0.598088312	0.565923276	0.585510878	0.632360747	0.66202784	0.627624315	0.49979738	0.2805427	0.004649247	-0.27221154	-0.494008716	-0.625023597	-0.662142587	-0.633862855	-0.586805751	-0.565806737	-0.596192214	-0.675593815	-0.778219372	-0.86892726	-0.920242093	-0.924454406	-0.895534215	-0.860499473	-0.844819603	-0.859126176	-0.893732366
0.097967609	0.194992693	0.290141792	0.382499497	0.471177254	0.555321913	0.634123934	0.706825181	0.77272621	0.831193	0.881663054	0.923650812	0.956752317	0.980649106	0.995111274	0.999999683	0.995267302	0.980959662	0.957214412	0.924260001	0.882413476	0.832077435	0.773736149	0.707950909	0.635354619	0.556645715	0.472581438	0.383970553	0.291665567	0.196554527	0.099552477	0.001592653	-0.096382494	-0.193430364	-0.288617281	-0.381027471	-0.469771875	-0.553996702	-0.632891641	-0.705697661	-0.77171431	-0.830306456	-0.880910396	-0.92303928	-0.956287795	-0.980336063	-0.994952721	-0.999997146	-0.995420806	-0.981267729
0.098131933	0.195649725	0.291614668	0.385099648	0.47519804	0.561032454	0.641763232	0.716596616	0.784792515	0.845671789	0.898622981	0.943108428	0.9786697	1.004932296	1.021609561	1.028505783	1.025518426	1.012639494	0.98995598	0.957649423	0.915994547	0.865357009	0.806190261	0.739031557	0.664497143	0.583276662	0.496126832	0.403864451	0.307358796	0.207523476	0.105307829	0.001687931	-0.102342694	-0.205782569	-0.30763189	-0.406902172	-0.502625832	-0.593865625	-0.679723815	-0.759351024	-0.831954643	-0.896806744	-0.953251394	-1.000711317	-1.038693816	-1.066795913	-1.084708634	-1.092220411	-1.08921955	-1.075695741
0.097967609	0.194992693	0.290141792	0.382499497	0.471177254	0.555321913	0.634123934	0.706825181	0.77272621	0.831193	0.881663054	0.923650812	0.956752317	0.980649106	0.995111274	0.999999683	0.995267302	0.980959662	0.957214412	0.924260001	0.882413476	0.832077435	0.773736149	0.707950909	0.635354619	0.556645715	0.472581438	0.383970553	0.291665567	0.196554527	0.099552477	0.001592653	-0.096382494	-0.193430364	-0.288617281	-0.381027471	-0.469771875	-0.553996702	-0.632891641	-0.705697661	-0.77171431	-0.830306456	-0.880910396	-0.92303928	-0.956287795	-0.980336063	-0.994952721	-0.999997146	-0.995420806	-0.981267729
0.097967609	0.194992693	0.290141792	0.382499497	0.471177254	0.555321913	0.634123934	0.706825181	0.77272621	0.831193	0.881663054	0.923650812	0.956752317	0.980649106	0.995111274	0.999999683	0.995267302	0.980959662	0.957214412	0.924260001	0.882413476	0.832077435	0.773736149	0.707950909	0.635354619	0.556645715	0.472581438	0.383970553	0.291665567	0.196554527	0.099552477	0.001592653	-0.096382494	-0.193430364	-0.288617281	-0.381027471	-0.469771875	-0.553996702	-0.632891641	-0.705697661	-0.77171431	-0.830306456	-0.880910396	-0.92303928	-0.956287795	-0.980336063	-0.994952721	-0.999997146	-0.995420806	-0.981267729
0.097967609	0.194992693	0.290141792	0.382499497	0.471177254	0.555321913	0.634123934	0.706825181	0.77272621	0.831193	0.881663054	0.923650812	0.956752317	0.980649106	0.995111274	0.999999683	0.995267302	0.980959662	0.957214412	0.924260001	0.882413476	0.832077435	0.773736149	0.707950909	0.635354619	0.556645715	0.472581438	0.383970553	0.291665567	0.196554527	0.099552477	0.001592653	-0.096382494	-0.193430364	-0.288617281	-0.381027471	-0.469771875	-0.553996702	-0.632891641	-0.705697661	-0.77171431	-0.830306456	-0.880910396	-0.92303928	-0.956287795	-0.980336063	-0.994952721	-0.999997146	-0.995420806	-0.981267729
0.098156955	0.195749771	0.291838943	0.385495572	0.475810283	0.561901996	0.642926466	0.71808451	0.786629848	0.847876471	0.901205464	0.946071234	0.982007054	1.008629891	1.025644448	1.032846398	1.030124757	1.017463373	0.99494153	0.962733621	0.921107928	0.870424481	0.811132039	0.743764199	0.668934667	0.587331749	0.499712082	0.40689369	0.3097484	0.209193715	0.106184195	0.001702439	-0.103250252	-0.207663436	-0.31052724	-0.410842105	-0.507628495	-0.599936455	-0.686854937	-0.767520806	-0.841127422	-0.906932724	-0.964266738	-1.012538416	-1.051241759	-1.079961131	-1.098375742	-1.106263222	-1.103502258	-1.090074268
0.098087901	0.195473667	0.291219997	0.384402913	0.474120632	0.55950226	0.63971621	0.713978268	0.781559235	0.841792061	0.894078408	0.937894576	0.97279673	0.998425386	1.014509095	1.020867304	1.017412352	1.004150583	0.981182567	0.948702412	0.906996182	0.856439433	0.797493875	0.730703204	0.656688128	0.576140648	0.489817621	0.398533693	0.303153647	0.204584243	0.103765628	0.0016624	-0.100745602	-0.202472679	-0.302536746	-0.399968801	-0.493822304	-0.58318237	-0.667174691	-0.744974098	-0.815812676	-0.878987363	-0.93386694	-0.97989836	-1.016612344	-1.043628179	-1.060657689	-1.067508315	-1.06408529	-1.050392862
0.199819105	0.380395529	0.526283844	0.628798312	0.687492463	0.709839963	0.709205099	0.701576672	0.701818648	0.720299428	0.760672078	0.819307934	0.886496142	0.949101642	0.994023374	1.011598535	0.998107773	0.956752083	0.896845691	0.831411304	0.773766274	0.7339498	0.715894601	0.716075036	0.724007209	0.724522263	0.701294242	0.640788664	0.535686077	0.386954601	0.204066665	0.003297741	-0.195500614	-0.372905678	-0.513786872	-0.610157276	-0.662396588	-0.678619977	-0.67239924	-0.659412292	-0.653820043	-0.665200381	-0.696708327	-0.744824609	-0.800678344	-0.852571153	-0.889069416	-0.901922292	-0.888123643	-0.850647093
0.097967609	0.194992693	0.290141792	0.382499497	0.471177254	0.555321913	0.634123934	0.706825181	0.77272621	0.831193	0.881663054	0.923650812	0.956752317	0.980649106	0.995111274	0.999999683	0.995267302	0.980959662	0.957214412	0.924260001	0.882413476	0.832077435	0.773736149	0.707950909	0.635354619	0.556645715	0.472581438	0.383970553	0.291665567	0.196554527	0.099552477	0.001592653	-0.096382494	-0.193430364	-0.288617281	-0.381027471	-0.469771875	-0.553996702	-0.632891641	-0.705697661	-0.77171431	-0.830306456	-0.880910396	-0.92303928	-0.956287795	-0.980336063	-0.994952721	-0.999997146	-0.995420806	-0.981267729
0.098159859	0.195757843	0.291849015	0.385499035	0.475793265	0.561845728	0.642807838	0.717876804	0.786303634	0.847400656	0.900548471	0.945202284	0.980897527	1.007254736	1.023983611	1.030886225	1.02785935	1.014895859	0.992085195	0.9596129	0.917759193	0.866896618	0.807486771	0.740076137	0.665291084	0.583832037	0.496466908	0.404023834	0.307383284	0.207469631	0.105242247	0.001686226	-0.102197192	-0.205400379	-0.306919194	-0.405762842	-0.500963651	-0.591586649	-0.676738846	-0.755578148	-0.82732178	-0.89125416	-0.94673413	-0.993201475	-1.030182659	-1.057295715	-1.074254254	-1.080870522	-1.077057502	-1.062830016
0.098159859	0.195757843	0.291849015	0.385499035	0.475793265	0.561845728	0.642807838	0.717876804	0.786303634	0.847400656	0.900548471	0.945202284	0.980897527	1.007254736	1.023983611	1.030886225	1.02785935	1.014895859	0.992085195	0.9596129	0.917759193	0.866896618	0.807486771	0.740076137	0.665291084	0.583832037	0.496466908	0.404023834	0.307383284	0.207469631	0.105242247	0.001686226	-0.102197192	-0.205400379	-0.306919194	-0.405762842	-0.500963651	-0.591586649	-0.676738846	-0.755578148	-0.82732178	-0.89125416	-0.94673413	-0.993201475	-1.030182659	-1.057295715	-1.074254254	-1.080870522	-1.077057502	-1.062830016
0.097967609	0.194992693	0.290141792	0.382499497	0.471177254	0.555321913	0.634123934	0.706825181	0.77272621	0.831193	0.881663054	0.923650812	0.956752317	0.980649106	0.995111274	0.999999683	0.995267302	0.980959662	0.957214412	0.924260001	0.882413476	0.832077435	0.773736149	0.707950909	0.635354619	0.556645715	0.472581438	0.383970553	0.291665567	0.196554527	0.099552477	0.001592653	-0.096382494	-0.193430364	-0.288617281	-0.381027471	-0.469771875	-0.553996702	-0.632891641	-0.705697661	-0.77171431	-0.830306456	-0.880910396	-0.92303928	-0.956287795	-0.980336063	-0.994952721	-0.999997146	-0.995420806	-0.981267729
0.097967609	0.194992693	0.290141792	0.382499497	0.471177254	0.555321913	0.634123934	0.706825181	0.77272621	0.831193	0.881663054	0.923650812	0.956752317	0.980649106	0.995111274	0.999999683	0.995267302	0.980959662	0.957214412	0.924260001	0.882413476	0.832077435	0.773736149	0.707950909	0.635354619	0.556645715	0.472581438	0.383970553	0.291665567	0.196554527	0.099552477	0.001592653	-0.096382494	-0.193430364	-0.288617281	-0.381027471	-0.469771875	-0.553996702	-0.632891641	-0.705697661	-0.77171431	-0.830306456	-0.880910396	-0.92303928	-0.956287795	-0.980336063	-0.994952721	-0.999997146	-0.995420806	-0.981267729
0.097967609	0.194992693	0.290141792	0.382499497	0.471177254	0.555321913	0.634123934	0.706825181	0.77272621	0.831193	0.881663054	0.923650812	0.956752317	0.980649106	0.995111274	0.999999683	0.995267302	0.980959662	0.957214412	0.924260001	0.882413476	0.832077435	0.773736149	0.707950909	0.255192119	0.556645715	0.472581438	0.383970553	0.291665567	0.196554527	0.099552477	0.001592653	-0.096382494	-0.193430364	-0.288617281	-0.381027471	-0.469771875	-0.553996702	-0.632891641	-0.705697661	-0.77171431	-0.830306456	-0.880910396	-0.92303928	-0.956287795	-0.980336063	-0.994952721	-0.999997146	-0.995420806	-0.981267729
0.20938496	0.38371428	0.50073025	0.558493818	0.574630377	0.577854057	0.595582289	0.642995339	0.718075058	0.804381323	0.879864871	0.927426286	0.94234978	0.933379611	0.917270025	0.909695128	0.917045737	0.933126071	0.94235596	0.927922113	0.880891628	0.805751157	0.719444195	0.644021715	0.59609666	0.577963842	0.574702964	0.559019046	0.50211664	0.386105592	0.212577726	0.003500903	-0.206182661	-0.381307397	-0.499327796	-0.557957368	-0.57455442	-0.577748382	-0.59507614	-0.641976587	-0.716709008	-0.803008519	-0.878830466	-0.926921545	-0.942337118	-0.933631297	-0.917496781	-0.909699357	-0.916823971	-0.932870757
0.068363297	0.248121207	0.472047159	0.654506312	0.722396396	0.645898195	0.473328168	0.405406495	0.592124628	0.816743687	0.941816115	0.945964664	0.878356584	0.818791633	0.806495533	0.81145347	0.806566979	0.81822115	0.877121601	0.945235007	0.942795843	0.819743657	0.596065435	0.406719538	0.470566694	0.64358317	0.722305236	0.656677422	0.475571582	0.251625741	0.070526592	1.86E-05	-0.066230313	-0.244628735	-0.468511532	-0.652304063	-0.722447921	-0.648184682	-0.476113456	-0.404176594	-0.588188962	-0.813715227	-0.940802974	-0.946674595	-0.879594663	-0.819376567	-0.806428422	-0.811449354	-0.806642534	-0.817665097
0.224888801	0.425899848	0.583909162	0.688255034	0.738589777	0.744479254	0.722860677	0.693951868	0.676555158	0.68383503	0.720536475	0.782273198	0.857026651	0.928470994	0.980300005	1.000486579	0.98441687	0.93611134	0.867212692	0.793974105	0.732984728	0.696696866	0.689885985	0.707959994	0.737587955	0.759549506	0.7531556	0.701196433	0.594232385	0.433193662	0.229656477	0.003717762	-0.220040557	-0.417561681	-0.570147257	-0.668024497	-0.711874974	-0.712042733	-0.685680185	-0.652552943	-0.63050399	-0.63161595	-0.659909011	-0.711027978	-0.773900355	-0.833898765	-0.876714665	-0.892013745	-0.876019221	-0.832433474
0.097967609	0.194992693	0.290141792	0.382499497	0.471177254	0.555321913	0.634123934	0.706825181	0.77272621	0.831193	0.881663054	0.923650812	0.956752317	0.980649106	0.995111274	0.999999683	0.995267302	0.980959662	0.957214412	0.924260001	0.882413476	0.832077435	0.773736149	0.707950909	0.635354619	0.556645715	0.472581438	0.383970553	0.291665567	0.196554527	0.099552477	0.001592653	-0.096382494	-0.193430364	-0.288617281	-0.381027471	-0.469771875	-0.553996702	-0.632891641	-0.705697661	-0.77171431	-0.830306456	-0.880910396	-0.92303928	-0.956287795	-0.980336063	-0.994952721	-0.999997146	-0.995420806	-0.981267729
0.097967609	0.194992693	0.290141792	0.382499497	0.471177254	0.555321913	0.634123934	0.706825181	0.77272621	0.831193	0.881663054	0.923650812	0.956752317	0.980649106	0.995111274	0.999999683	0.995267302	0.980959662	0.957214412	0.924260001	0.882413476	0.832077435	0.773736149	0.707950909	0.635354619	0.556645715	0.472581438	0.383970553	0.291665567	0.196554527	0.099552477	0.001592653	-0.096382494	-0.193430364	-0.288617281	-0.381027471	-0.469771875	-0.553996702	-0.632891641	-0.705697661	-0.77171431	-0.830306456	-0.880910396	-0.92303928	-0.956287795	-0.980336063	-0.994952721	-0.999997146	-0.995420806	-0.981267729
0.070894032	0.25733976	0.489725334	0.679441196	0.75106128	0.674587461	0.502558342	0.441550433	0.634748429	0.867005486	0.998647695	1.007396413	0.943677971	0.887912372	0.878094703	0.883798983	0.878191078	0.88739625	0.942507083	1.006731193	0.999716207	0.870127265	0.638805428	0.442978408	0.499858667	0.672257097	0.750996174	0.681705267	0.493385032	0.260975314	0.073137503	1.93E-05	-0.068682002	-0.253716749	-0.486054103	-0.67714501	-0.751085685	-0.676889259	-0.505284314	-0.440204439	-0.630697145	-0.863854866	-0.997545198	-1.008041734	-0.944851998	-0.888442557	-0.878002195	-0.8837945	-0.878291093	-0.886894164
0.097967609	0.194992693	0.290141792	0.382499497	0.471177254	0.555321913	0.634123934	0.706825181	0.77272621	0.831193	0.881663054	0.923650812	0.956752317	0.980649106	0.995111274	0.999999683	0.995267302	0.980959662	0.957214412	0.924260001	0.882413476	0.832077435	0.773736149	0.707950909	0.635354619	0.556645715	0.472581438	0.383970553	0.291665567	0.196554527	0.099552477	0.001592653	-0.096382494	-0.193430364	-0.288617281	-0.381027471	-0.469771875	-0.553996702	-0.632891641	-0.705697661	-0.77171431	-0.830306456	-0.880910396	-0.92303928	-0.956287795	-0.980336063	-0.994952721	-0.999997146	-0.995420806	-0.981267729
0.097967609	0.194992693	0.290141792	0.382499497	0.471177254	0.555321913	0.634123934	0.706825181	0.77272621	0.831193	0.881663054	0.923650812	0.956752317	0.980649106	0.995111274	0.999999683	0.995267302	0.980959662	0.957214412	0.924260001	0.882413476	0.832077435	0.773736149	0.707950909	0.635354619	0.556645715	0.472581438	0.383970553	0.291665567	0.196554527	0.099552477	0.001592653	-0.096382494	-0.193430364	-0.288617281	-0.381027471	-0.469771875	-0.553996702	-0.632891641	-0.705697661	-0.77171431	-0.830306456	-0.880910396	-0.92303928	-0.956287795	-0.980336063	-0.994952721	-0.999997146	-0.995420806	-0.981267729
0.097967609	0.194992693	0.290141792	0.382499497	0.471177254	0.555321913	0.634123934	0.706825181	0.77272621	0.831193	0.881663054	0.923650812	0.956752317	0.980649106	0.995111274	0.999999683	0.995267302	0.980959662	0.957214412	0.924260001	0.882413476	0.832077435	0.773736149	0.707950909	0.635354619	0.556645715	0.472581438	0.383970553	0.291665567	0.196554527	0.099552477	0.001592653	-0.096382494	-0.193430364	-0.288617281	-0.381027471	-0.469771875	-0.553996702	-0.632891641	-0.705697661	-0.77171431	-0.830306456	-0.880910396	-0.92303928	-0.956287795	-0.980336063	-0.994952721	-0.999997146	-0.995420806	-0.981267729
0.097967609	0.194992693	0.290141792	0.382499497	0.471177254	0.555321913	0.634123934	0.706825181	0.77272621	0.831193	0.881663054	0.923650812	0.956752317	0.980649106	0.995111274	0.999999683	0.995267302	0.980959662	0.957214412	0.924260001	0.882413476	0.832077435	0.773736149	0.707950909	0.987342119	0.556645715	0.472581438	0.383970553	0.291665567	0.196554527	0.099552477	0.001592653	-0.096382494	-0.193430364	-0.288617281	-0.381027471	-0.469771875	-0.553996702	-0.632891641	-0.705697661	-0.77171431	-0.830306456	-0.880910396	-0.92303928	-0.956287795	-0.980336063	-0.994952721	-0.999997146	-0.995420806	-0.981267729
0.030998188	0.115293386	0.22965008	0.343923002	0.430886895	0.47497201	0.476980425	0.453215266	0.429339125	0.431054734	0.474772016	0.561430227	0.675580472	0.790060646	0.87470882	0.906197666	0.875690725	0.791750077	0.677518904	0.56312515	0.475856627	0.43140362	0.42910129	0.452753724	0.4767391	0.475315181	0.431965665	0.345614182	0.231588451	0.116986841	0.031987271	8.37E-06	-0.030023479	-0.113608009	-0.22771162	-0.34222436	-0.429796451	-0.474617398	-0.477214745	-0.453676779	-0.429583916	-0.430717268	-0.473699095	-0.559742815	-0.673642196	-0.788363199	-0.873712578	-0.906180934	-0.876658218	-0.793431369
0.068018792	0.246866203	0.469640071	0.651109908	0.71848846	0.64197655	0.469293741	0.400341415	0.586208022	0.809807249	0.933978231	0.937470641	0.869277327	0.809130642	0.796463973	0.801315228	0.796531799	0.80855189	0.868032539	0.936731514	0.934945577	0.812790705	0.590133625	0.401638365	0.466522625	0.639663324	0.718393659	0.653268326	0.473146065	0.250352898	0.070171172	1.85E-05	-0.065896569	-0.243391506	-0.466122918	-0.648920483	-0.718543771	-0.644261236	-0.472088304	-0.399127827	-0.582287471	-0.806795344	-0.932977544	-0.938190057	-0.870525202	-0.809723907	-0.796400554	-0.801311164	-0.796603805	-0.807987633
0.097967609	0.194992693	0.290141792	0.382499497	0.471177254	0.555321913	0.634123934	0.706825181	0.77272621	0.831193	0.881663054	0.923650812	0.956752317	0.980649106	0.995111274	0.999999683	0.995267302	0.980959662	0.957214412	0.924260001	0.882413476	0.832077435	0.773736149	0.707950909	0.288679619	0.556645715	0.472581438	0.383970553	0.291665567	0.196554527	0.099552477	0.001592653	-0.096382494	-0.193430364	-0.288617281	-0.381027471	-0.469771875	-0.553996702	-0.632891641	-0.705697661	-0.77171431	-0.830306456	-0.880910396	-0.92303928	-0.956287795	-0.980336063	-0.994952721	-0.999997146	-0.995420806	-0.981267729
0.097967609	0.194992693	0.290141792	0.382499497	0.471177254	0.555321913	0.634123934	0.706825181	0.77272621	0.831193	0.881663054	0.923650812	0.956752317	0.980649106	0.995111274	0.999999683	0.995267302	0.980959662	0.957214412	0.924260001	0.882413476	0.832077435	0.773736149	0.707950909	0.635354619	0.556645715	0.472581438	0.383970553	0.291665567	0.196554527	0.099552477	0.001592653	-0.096382494	-0.193430364	-0.288617281	-0.381027471	-0.469771875	-0.553996702	-0.632891641	-0.705697661	-0.77171431	-0.830306456	-0.880910396	-0.92303928	-0.956287795	-0.980336063	-0.994952721	-0.999997146	-0.995420806	-0.981267729
0.097967609	0.194992693	0.290141792	0.382499497	0.471177254	0.555321913	0.634123934	0.706825181	0.77272621	0.831193	0.881663054	0.923650812	0.956752317	0.980649106	0.995111274	0.999999683	0.995267302	0.980959662	0.957214412	0.924260001	0.882413476	0.832077435	0.773736149	0.707950909	1.065229619	0.556645715	0.472581438	0.383970553	0.291665567	0.196554527	0.099552477	0.001592653	-0.096382494	-0.193430364	-0.288617281	-0.381027471	-0.469771875	-0.553996702	-0.632891641	-0.705697661	-0.77171431	-0.830306456	-0.880910396	-0.92303928	-0.956287795	-0.980336063	-0.994952721	-0.999997146	-0.995420806	-0.981267729
0.097967609	0.194992693	0.290141792	0.382499497	0.471177254	0.555321913	0.634123934	0.706825181	0.77272621	0.831193	0.881663054	0.923650812	0.956752317	0.980649106	0.995111274	0.999999683	0.995267302	0.980959662	0.957214412	0.924260001	0.882413476	0.832077435	0.773736149	0.707950909	0.635354619	0.556645715	0.472581438	0.383970553	0.291665567	0.196554527	0.099552477	0.001592653	-0.096382494	-0.193430364	-0.288617281	-0.381027471	-0.469771875	-0.553996702	-0.632891641	-0.705697661	-0.77171431	-0.830306456	-0.880910396	-0.92303928	-0.956287795	-0.980336063	-0.994952721	-0.999997146	-0.995420806	-0.981267729
0.097967609	0.194992693	0.290141792	0.382499497	0.471177254	0.555321913	0.634123934	0.706825181	0.77272621	0.831193	0.881663054	0.923650812	0.956752317	0.980649106	0.995111274	0.999999683	0.995267302	0.980959662	0.957214412	0.924260001	0.882413476	0.832077435	0.773736149	0.707950909	0.635354619	0.556645715	0.472581438	0.383970553	0.291665567	0.196554527	0.099552477	0.001592653	-0.096382494	-0.193430364	-0.288617281	-0.381027471	-0.469771875	-0.553996702	-0.632891641	-0.705697661	-0.77171431	-0.830306456	-0.880910396	-0.92303928	-0.956287795	-0.980336063	-0.994952721	-0.999997146	-0.995420806	-0.981267729
0.097967609	0.194992693	0.290141792	0.382499497	0.471177254	0.555321913	0.634123934	0.706825181	0.77272621	0.831193	0.881663054	0.923650812	0.956752317	0.980649106	0.995111274	0.999999683	0.995267302	0.980959662	0.957214412	0.924260001	0.882413476	0.832077435	0.773736149	0.707950909	0.635354619	0.556645715	0.472581438	0.383970553	0.291665567	0.196554527	0.099552477	0.001592653	-0.096382494	-0.193430364	-0.288617281	-0.381027471	-0.469771875	-0.553996702	-0.632891641	-0.705697661	-0.77171431	-0.830306456	-0.880910396	-0.92303928	-0.956287795	-0.980336063	-0.994952721	-0.999997146	-0.995420806	-0.981267729
0.186273475	0.355790856	0.495080326	0.596516689	0.65960134	0.690686764	0.701221953	0.704928539	0.71455916	0.738983451	0.781269577	0.838195806	0.90128943	0.959127038	1.000326845	1.016494273	1.004389849	0.966775146	0.911715586	0.850501211	0.794694411	0.753039802	0.729017558	0.719673246	0.716048985	0.705147771	0.672982524	0.607988731	0.503982855	0.361952225	0.190239905	0.003070847	-0.182241317	-0.348760101	-0.483269255	-0.578740506	-0.635392485	-0.660145777	-0.664652584	-0.662399189	-0.665572306	-0.682406933	-0.715594389	-0.762063902	-0.814125422	-0.861651428	-0.894750113	-0.906287952	-0.893672044	-0.859485109
0.097967609	0.194992693	0.290141792	0.382499497	0.471177254	0.555321913	0.634123934	0.706825181	0.77272621	0.831193	0.881663054	0.923650812	0.956752317	0.980649106	0.995111274	0.999999683	0.995267302	0.980959662	0.957214412	0.924260001	0.882413476	0.832077435	0.773736149	0.707950909	0.635354619	0.556645715	0.472581438	0.383970553	0.291665567	0.196554527	0.099552477	0.001592653	-0.096382494	-0.193430364	-0.288617281	-0.381027471	-0.469771875	-0.553996702	-0.632891641	-0.705697661	-0.77171431	-0.830306456	-0.880910396	-0.92303928	-0.956287795	-0.980336063	-0.994952721	-0.999997146	-0.995420806	-0.981267729
0.097967609	0.194992693	0.290141792	0.382499497	0.471177254	0.555321913	0.634123934	0.706825181	0.77272621	0.831193	0.881663054	0.923650812	0.956752317	0.980649106	0.995111274	0.999999683	0.995267302	0.980959662	0.957214412	0.924260001	0.882413476	0.832077435	0.773736149	0.707950909	0.635354619	0.556645715	0.472581438	0.383970553	0.291665567	0.196554527	0.099552477	0.001592653	-0.096382494	-0.193430364	-0.288617281	-0.381027471	-0.469771875	-0.553996702	-0.632891641	-0.705697661	-0.77171431	-0.830306456	-0.880910396	-0.92303928	-0.956287795	-0.980336063	-0.994952721	-0.999997146	-0.995420806	-0.981267729
0.097967609	0.194992693	0.290141792	0.382499497	0.471177254	0.555321913	0.634123934	0.706825181	0.77272621	0.831193	0.881663054	0.923650812	0.956752317	0.980649106	0.995111274	0.999999683	0.995267302	0.980959662	0.957214412	0.924260001	0.882413476	0.832077435	0.773736149	0.707950909	0.635354619	0.556645715	0.472581438	0.383970553	0.291665567	0.196554527	0.099552477	0.001592653	-0.096382494	-0.193430364	-0.288617281	-0.381027471	-0.469771875	-0.553996702	-0.632891641	-0.705697661	-0.77171431	-0.830306456	-0.880910396	-0.92303928	-0.956287795	-0.980336063	-0.994952721	-0.999997146	-0.995420806	-0.981267729
0.067197965	0.243875906	0.463904295	0.643015463	0.709171367	0.63261605	0.459622741	0.388113933	0.571988437	0.793180684	0.915196541	0.917093137	0.847443509	0.785837291	0.772249445	0.776840752	0.772308385	0.78523784	0.846174145	0.916330685	0.916134069	0.796124878	0.575878526	0.389372054	0.456827313	0.630306807	0.709067791	0.645143602	0.467366367	0.247320092	0.069324339	1.83E-05	-0.065101381	-0.24044356	-0.460431171	-0.640856631	-0.709235794	-0.63489674	-0.462440715	-0.386939778	-0.568103179	-0.790208134	-0.914225839	-0.917835909	-0.848715937	-0.786451417	-0.772195093	-0.776836813	-0.772371683	-0.784653046
0.097967609	0.194992693	0.290141792	0.382499497	0.471177254	0.555321913	0.634123934	0.706825181	0.77272621	0.831193	0.881663054	0.923650812	0.956752317	0.980649106	0.995111274	0.999999683	0.995267302	0.980959662	0.957214412	0.924260001	0.882413476	0.832077435	0.773736149	0.707950909	0.635354619	0.556645715	0.472581438	0.383970553	0.291665567	0.196554527	0.099552477	0.001592653	-0.096382494	-0.193430364	-0.288617281	-0.381027471	-0.469771875	-0.553996702	-0.632891641	-0.705697661	-0.77171431	-0.830306456	-0.880910396	-0.92303928	-0.956287795	-0.980336063	-0.994952721	-0.999997146	-0.995420806	-0.981267729
0.028953087	0.107939917	0.215922016	0.325565729	0.412099706	0.461189728	0.47319711	0.462408569	0.451521771	0.463270456	0.512037304	0.598306831	0.707853214	0.815961454	0.895282325	0.924694063	0.89620016	0.817548795	0.70969469	0.599955323	0.513157864	0.46374464	0.451477588	0.462166328	0.473149839	0.461658873	0.413215161	0.327211045	0.217763665	0.109531136	0.029877656	7.81E-06	-0.028042002	-0.106356482	-0.214080744	-0.323914084	-0.410974049	-0.460710494	-0.473238183	-0.462650784	-0.451572109	-0.462806343	-0.510926963	-0.596664713	-0.70601142	-0.814366387	-0.89435104	-0.924678447	-0.897104479	-0.819128297
0.097967609	0.194992693	0.290141792	0.382499497	0.471177254	0.555321913	0.634123934	0.706825181	0.77272621	0.831193	0.881663054	0.923650812	0.956752317	0.980649106	0.995111274	0.999999683	0.995267302	0.980959662	0.957214412	0.924260001	0.882413476	0.832077435	0.773736149	0.707950909	1.023829619	0.556645715	0.472581438	0.383970553	0.291665567	0.196554527	0.099552477	0.001592653	-0.096382494	-0.193430364	-0.288617281	-0.381027471	-0.469771875	-0.553996702	-0.632891641	-0.705697661	-0.77171431	-0.830306456	-0.880910396	-0.92303928	-0.956287795	-0.980336063	-0.994952721	-0.999997146	-0.995420806	-0.981267729
0.097967609	0.194992693	0.290141792	0.382499497	0.471177254	0.555321913	0.634123934	0.706825181	0.77272621	0.831193	0.881663054	0.923650812	0.956752317	0.980649106	0.995111274	0.999999683	0.995267302	0.980959662	0.957214412	0.924260001	0.882413476	0.832077435	0.773736149	0.707950909	0.635354619	0.556645715	0.472581438	0.383970553	0.291665567	0.196554527	0.099552477	0.001592653	-0.096382494	-0.193430364	-0.288617281	-0.381027471	-0.469771875	-0.553996702	-0.632891641	-0.705697661	-0.77171431	-0.830306456	-0.880910396	-0.92303928	-0.956287795	-0.980336063	-0.994952721	-0.999997146	-0.995420806	-0.981267729
0.098159859	0.195757843	0.291849015	0.385499035	0.475793265	0.561845728	0.642807838	0.717876804	0.786303634	0.847400656	0.900548471	0.945202284	0.980897527	1.007254736	1.023983611	1.030886225	1.02785935	1.014895859	0.992085195	0.9596129	0.917759193	0.866896618	0.807486771	0.740076137	0.665291084	0.583832037	0.496466908	0.404023834	0.307383284	0.207469631	0.105242247	0.001686226	-0.102197192	-0.205400379	-0.306919194	-0.405762842	-0.500963651	-0.591586649	-0.676738846	-0.755578148	-0.82732178	-0.89125416	-0.94673413	-0.993201475	-1.030182659	-1.057295715	-1.074254254	-1.080870522	-1.077057502	-1.062830016
0.097967609	0.194992693	0.290141792	0.382499497	0.471177254	0.555321913	0.634123934	0.706825181	0.77272621	0.831193	0.881663054	0.923650812	0.956752317	0.980649106	0.995111274	0.999999683	0.995267302	0.980959662	0.957214412	0.924260001	0.882413476	0.832077435	0.773736149	0.707950909	0.453342119	0.556645715	0.472581438	0.383970553	0.291665567	0.196554527	0.099552477	0.001592653	-0.096382494	-0.193430364	-0.288617281	-0.381027471	-0.469771875	-0.553996702	-0.632891641	-0.705697661	-0.77171431	-0.830306456	-0.880910396	-0.92303928	-0.956287795	-0.980336063	-0.994952721	-0.999997146	-0.995420806	-0.981267729
0.097967609	0.194992693	0.290141792	0.382499497	0.471177254	0.555321913	0.634123934	0.706825181	0.77272621	0.831193	0.881663054	0.923650812	0.956752317	0.980649106	0.995111274	0.999999683	0.995267302	0.980959662	0.957214412	0.924260001	0.882413476	0.832077435	0.773736149	0.707950909	0.635354619	0.556645715	0.472581438	0.383970553	0.291665567	0.196554527	0.099552477	0.001592653	-0.096382494	-0.193430364	-0.288617281	-0.381027471	-0.469771875	-0.553996702	-0.632891641	-0.705697661	-0.77171431	-0.830306456	-0.880910396	-0.92303928	-0.956287795	-0.980336063	-0.994952721	-0.999997146	-0.995420806	-0.981267729
0.097967609	0.194992693	0.290141792	0.382499497	0.471177254	0.555321913	0.634123934	0.706825181	0.77272621	0.831193	0.881663054	0.923650812	0.956752317	0.980649106	0.995111274	0.999999683	0.995267302	0.980959662	0.957214412	0.924260001	0.882413476	0.832077435	0.773736149	0.707950909	1.009092119	0.556645715	0.472581438	0.383970553	0.291665567	0.196554527	0.099552477	0.001592653	-0.096382494	-0.193430364	-0.288617281	-0.381027471	-0.469771875	-0.553996702	-0.632891641	-0.705697661	-0.77171431	-0.830306456	-0.880910396	-0.92303928	-0.956287795	-0.980336063	-0.994952721	-0.999997146	-0.995420806	-0.981267729
0.020846143	0.078719109	0.161103128	0.251578901	0.334917803	0.401624836	0.45042305	0.487870215	0.525268046	0.573938617	0.640493784	0.723725766	0.814199836	0.896717514	0.954848234	0.976026049	0.955511893	0.897897529	0.815648279	0.725171831	0.64172665	0.574867833	0.525941526	0.488444255	0.451094986	0.402551604	0.33614838	0.253023954	0.162552614	0.079902388	0.021514764	5.60E-06	-0.020187457	-0.077542376	-0.159655746	-0.250131837	-0.333682655	-0.400693169	-0.449748014	-0.487296162	-0.524597643	-0.573014293	-0.639265501	-0.722281741	-0.812749326	-0.895530986	-0.954174661	-0.976014851	-0.956165597	-0.899070964
0.097967609	0.194992693	0.290141792	0.382499497	0.471177254	0.555321913	0.634123934	0.706825181	0.77272621	0.831193	0.881663054	0.923650812	0.956752317	0.980649106	0.995111274	0.999999683	0.995267302	0.980959662	0.957214412	0.924260001	0.882413476	0.832077435	0.773736149	0.707950909	0.635354619	0.556645715	0.472581438	0.383970553	0.291665567	0.196554527	0.099552477	0.001592653	-0.096382494	-0.193430364	-0.288617281	-0.381027471	-0.469771875	-0.553996702	-0.632891641	-0.705697661	-0.77171431	-0.830306456	-0.880910396	-0.92303928	-0.956287795	-0.980336063	-0.994952721	-0.999997146	-0.995420806	-0.981267729
0.097967609	0.194992693	0.290141792	0.382499497	0.471177254	0.555321913	0.634123934	0.706825181	0.77272621	0.831193	0.881663054	0.923650812	0.956752317	0.980649106	0.995111274	0.999999683	0.995267302	0.980959662	0.957214412	0.924260001	0.882413476	0.832077435	0.773736149	0.707950909	0.241129619	0.556645715	0.472581438	0.383970553	0.291665567	0.196554527	0.099552477	0.001592653	-0.096382494	-0.193430364	-0.288617281	-0.381027471	-0.469771875	-0.553996702	-0.632891641	-0.705697661	-0.77171431	-0.830306456	-0.880910396	-0.92303928	-0.956287795	-0.980336063	-0.994952721	-0.999997146	-0.995420806	-0.981267729
0.211921793	0.388004491	0.505500723	0.562448133	0.576897637	0.578242807	0.594549715	0.641364952	0.716640238	0.803572484	0.87961895	0.927298663	0.941796875	0.932066114	0.915250853	0.907388504	0.915017792	0.931799543	0.941792475	0.927791744	0.88065188	0.804953265	0.718017391	0.642388784	0.595047345	0.578324395	0.576939308	0.562951291	0.506883604	0.390414496	0.215151129	0.003544371	-0.208682711	-0.385578569	-0.504101426	-0.561933517	-0.576852547	-0.578165456	-0.594060533	-0.64034896	-0.715266287	-0.802188715	-0.878578247	-0.926796517	-0.941794701	-0.932330846	-0.915486497	-0.907392889	-0.914787369	-0.931531215
0.098095023	0.195502141	0.291283828	0.384515598	0.474294884	0.559749742	0.64004728	0.71440174	0.782082161	0.842419539	0.894813413	0.938737825	0.97374658	0.999477764	1.015657471	1.022102694	1.018723367	1.005523516	0.982601513	0.950149434	0.90845151	0.857881694	0.798900363	0.732050169	0.6579511	0.577294773	0.490838025	0.39939585	0.303833756	0.205059612	0.104015052	0.001666529	-0.101003903	-0.203007996	-0.303360796	-0.401090152	-0.49524612	-0.584910199	-0.669204292	-0.747299313	-0.818423356	-0.881869335	-0.937002035	-0.983264491	-1.020183635	-1.047375153	-1.064547507	-1.071505063	-1.068150315	-1.054485159
0.097967609	0.194992693	0.290141792	0.382499497	0.471177254	0.555321913	0.634123934	0.706825181	0.77272621	0.831193	0.881663054	0.923650812	0.956752317	0.980649106	0.995111274	0.999999683	0.995267302	0.980959662	0.957214412	0.924260001	0.882413476	0.832077435	0.773736149	0.707950909	0.635354619	0.556645715	0.472581438	0.383970553	0.291665567	0.196554527	0.099552477	0.001592653	-0.096382494	-0.193430364	-0.288617281	-0.381027471	-0.469771875	-0.553996702	-0.632891641	-0.705697661	-0.77171431	-0.830306456	-0.880910396	-0.92303928	-0.956287795	-0.980336063	-0.994952721	-0.999997146	-0.995420806	-0.981267729
0.097967609	0.194992693	0.290141792	0.382499497	0.471177254	0.555321913	0.634123934	0.706825181	0.77272621	0.831193	0.881663054	0.923650812	0.956752317	0.980649106	0.995111274	0.999999683	0.995267302	0.980959662	0.957214412	0.924260001	0.882413476	0.832077435	0.773736149	0.707950909	1.112929619	0.556645715	0.472581438	0.383970553	0.291665567	0.196554527	0.099552477	0.001592653	-0.096382494	-0.193430364	-0.288617281	-0.381027471	-0.469771875	-0.553996702	-0.632891641	-0.705697661	-0.77171431	-0.830306456	-0.880910396	-0.92303928	-0.956287795	-0.980336063	-0.994952721	-0.999997146	-0.995420806	-0.981267729
0.068619741	0.249055393	0.473838856	0.657034201	0.72530445	0.648814771	0.476322229	0.409152495	0.596509905	0.821891547	0.947633843	0.952265817	0.885083945	0.825940954	0.813914967	0.818951446	0.813989069	0.825376476	0.883856077	0.951543091	0.94862274	0.824903821	0.600462135	0.410477441	0.473567725	0.646498359	0.725215987	0.659214752	0.477376994	0.252573205	0.07079116	1.87E-05	-0.066478747	-0.245549691	-0.47028948	-0.654822411	-0.725353173	-0.651102644	-0.479100813	-0.407910537	-0.59256288	-0.818850751	-0.94661148	-0.952968803	-0.886314916	-0.826519839	-0.813845149	-0.818947293	-0.814067229	-0.824826383
0.098120189	0.195602766	0.291509401	0.384913814	0.474910672	0.560624318	0.641217247	0.715898246	0.78393013	0.844636982	0.897410845	0.941717782	0.977103253	1.003196763	1.019715714	1.026468436	1.023356362	1.010375319	0.987615922	0.955263063	0.91359449	0.8629785	0.803870748	0.736810206	0.662414311	0.581373334	0.49444403	0.402442623	0.306237193	0.20673952	0.104896491	0.001681121	-0.101916715	-0.20489975	-0.306272906	-0.405052893	-0.500277742	-0.591016171	-0.676376694	-0.755516389	-0.827649233	-0.892053932	-0.948081143	-0.995160054	-1.032804213	-1.060616581	-1.07829373	-1.085629164	-1.082515702	-1.068946919
0.224641593	0.425451353	0.583341745	0.687670629	0.738089331	0.74414297	0.722733342	0.69403635	0.67681529	0.684206927	0.720945422	0.782651981	0.857330918	0.928688007	0.980448783	1.000609567	0.984565375	0.936328547	0.867518714	0.794357043	0.733400267	0.697076781	0.690153709	0.708049535	0.737461545	0.759209538	0.752647714	0.700602704	0.593655911	0.43273793	0.229404141	0.003713619	-0.219798571	-0.417121542	-0.569592283	-0.667455693	-0.711390344	-0.711718183	-0.685556132	-0.652629289	-0.630744144	-0.631958495	-0.660283955	-0.711373608	-0.774176774	-0.8340951	-0.876848535	-0.892123412	-0.876150586	-0.832625218
0.041560299	0.153107931	0.299632384	0.435937031	0.521699115	0.534833565	0.478668877	0.380528731	0.282208404	0.225565214	0.238088033	0.323317905	0.459357851	0.605985066	0.717980664	0.760196687	0.719293003	0.608195711	0.461777082	0.325210466	0.238917667	0.225171357	0.280855691	0.378812819	0.477310488	0.534430313	0.522518884	0.437822707	0.302050188	0.155323276	0.042882094	1.13E-05	-0.040257444	-0.150902033	-0.297211775	-0.434037621	-0.520859628	-0.53521801	-0.480015874	-0.382244594	-0.283572427	-0.225977844	-0.237278138	-0.321439151	-0.456941524	-0.603765066	-0.716649441	-0.760174187	-0.720586346	-0.610396814
0.098159859	0.195757843	0.291849015	0.385499035	0.475793265	0.561845728	0.642807838	0.717876804	0.786303634	0.847400656	0.900548471	0.945202284	0.980897527	1.007254736	1.023983611	1.030886225	1.02785935	1.014895859	0.992085195	0.9596129	0.917759193	0.866896618	0.807486771	0.740076137	0.665291084	0.583832037	0.496466908	0.404023834	0.307383284	0.207469631	0.105242247	0.001686226	-0.102197192	-0.205400379	-0.306919194	-0.405762842	-0.500963651	-0.591586649	-0.676738846	-0.755578148	-0.82732178	-0.89125416	-0.94673413	-0.993201475	-1.030182659	-1.057295715	-1.074254254	-1.080870522	-1.077057502	-1.062830016
0.097967609	0.194992693	0.290141792	0.382499497	0.471177254	0.555321913	0.634123934	0.706825181	0.77272621	0.831193	0.881663054	0.923650812	0.956752317	0.980649106	0.995111274	0.999999683	0.995267302	0.980959662	0.957214412	0.924260001	0.882413476	0.832077435	0.773736149	0.707950909	1.009954619	0.556645715	0.472581438	0.383970553	0.291665567	0.196554527	0.099552477	0.001592653	-0.096382494	-0.193430364	-0.288617281	-0.381027471	-0.469771875	-0.553996702	-0.632891641	-0.705697661	-0.77171431	-0.830306456	-0.880910396	-0.92303928	-0.956287795	-0.980336063	-0.994952721	-0.999997146	-0.995420806	-0.981267729
0.097967609	0.194992693	0.290141792	0.382499497	0.471177254	0.555321913	0.634123934	0.706825181	0.77272621	0.831193	0.881663054	0.923650812	0.956752317	0.980649106	0.995111274	0.999999683	0.995267302	0.980959662	0.957214412	0.924260001	0.882413476	0.832077435	0.773736149	0.707950909	0.635354619	0.556645715	0.472581438	0.383970553	0.291665567	0.196554527	0.099552477	0.001592653	-0.096382494	-0.193430364	-0.288617281	-0.381027471	-0.469771875	-0.553996702	-0.632891641	-0.705697661	-0.77171431	-0.830306456	-0.880910396	-0.92303928	-0.956287795	-0.980336063	-0.994952721	-0.999997146	-0.995420806	-0.981267729
0.098159859	0.195757843	0.291849015	0.385499035	0.475793265	0.561845728	0.642807838	0.717876804	0.786303634	0.847400656	0.900548471	0.945202284	0.980897527	1.007254736	1.023983611	1.030886225	1.02785935	1.014895859	0.992085195	0.9596129	0.917759193	0.866896618	0.807486771	0.740076137	0.665291084	0.583832037	0.496466908	0.404023834	0.307383284	0.207469631	0.105242247	0.001686226	-0.102197192	-0.205400379	-0.306919194	-0.405762842	-0.500963651	-0.591586649	-0.676738846	-0.755578148	-0.82732178	-0.89125416	-0.94673413	-0.993201475	-1.030182659	-1.057295715	-1.074254254	-1.080870522	-1.077057502	-1.062830016
0.097967609	0.194992693	0.290141792	0.382499497	0.471177254	0.555321913	0.634123934	0.706825181	0.77272621	0.831193	0.881663054	0.923650812	0.956752317	0.980649106	0.995111274	0.999999683	0.995267302	0.980959662	0.957214412	0.924260001	0.882413476	0.832077435	0.773736149	0.707950909	0.635354619	0.556645715	0.472581438	0.383970553	0.291665567	0.196554527	0.099552477	0.001592653	-0.096382494	-0.193430364	-0.288617281	-0.381027471	-0.469771875	-0.553996702	-0.632891641	-0.705697661	-0.77171431	-0.830306456	-0.880910396	-0.92303928	-0.956287795	-0.980336063	-0.994952721	-0.999997146	-0.995420806	-0.981267729
0.097967609	0.194992693	0.290141792	0.382499497	0.471177254	0.555321913	0.634123934	0.706825181	0.77272621	0.831193	0.881663054	0.923650812	0.956752317	0.980649106	0.995111274	0.999999683	0.995267302	0.980959662	0.957214412	0.924260001	0.882413476	0.832077435	0.773736149	0.707950909	1.095342119	0.556645715	0.472581438	0.383970553	0.291665567	0.196554527	0.099552477	0.001592653	-0.096382494	-0.193430364	-0.288617281	-0.381027471	-0.469771875	-0.553996702	-0.632891641	-0.705697661	-0.77171431	-0.830306456	-0.880910396	-0.92303928	-0.956287795	-0.980336063	-0.994952721	-0.999997146	-0.995420806	-0.981267729
0.042543632	0.15660921	0.306039423	0.444173735	0.529419947	0.539070556	0.476718786	0.370785946	0.26466607	0.201817386	0.210832113	0.29552342	0.433378495	0.582908718	0.697430774	0.740645471	0.698773823	0.585167175	0.435840134	0.297429404	0.211629825	0.20134309	0.263196016	0.368938878	0.475242841	0.538586499	0.530207394	0.446072517	0.308499491	0.158872422	0.043896347	1.15E-05	-0.041210279	-0.154355556	-0.303576264	-0.442260586	-0.52861198	-0.539535073	-0.478182906	-0.372632963	-0.266147865	-0.202311184	-0.210054942	-0.293631878	-0.430920051	-0.5806408	-0.696068423	-0.740622432	-0.700097453	-0.587415977
0.097967609	0.194992693	0.290141792	0.382499497	0.471177254	0.555321913	0.634123934	0.706825181	0.77272621	0.831193	0.881663054	0.923650812	0.956752317	0.980649106	0.995111274	0.999999683	0.995267302	0.980959662	0.957214412	0.924260001	0.882413476	0.832077435	0.773736149	0.707950909	1.112892119	0.556645715	0.472581438	0.383970553	0.291665567	0.196554527	0.099552477	0.001592653	-0.096382494	-0.193430364	-0.288617281	-0.381027471	-0.469771875	-0.553996702	-0.632891641	-0.705697661	-0.77171431	-0.830306456	-0.880910396	-0.92303928	-0.956287795	-0.980336063	-0.994952721	-0.999997146	-0.995420806	-0.981267729
0.097967609	0.194992693	0.290141792	0.382499497	0.471177254	0.555321913	0.634123934	0.706825181	0.77272621	0.831193	0.881663054	0.923650812	0.956752317	0.980649106	0.995111274	0.999999683	0.995267302	0.980959662	0.957214412	0.924260001	0.882413476	0.832077435	0.773736149	0.707950909	0.635354619	0.556645715	0.472581438	0.383970553	0.291665567	0.196554527	0.099552477	0.001592653	-0.096382494	-0.193430364	-0.288617281	-0.381027471	-0.469771875	-0.553996702	-0.632891641	-0.705697661	-0.77171431	-0.830306456	-0.880910396	-0.92303928	-0.956287795	-0.980336063	-0.994952721	-0.999997146	-0.995420806	-0.981267729
0.043773139	0.160980252	0.314012361	0.454356519	0.538815685	0.543898526	0.473539649	0.357557949	0.2413805	0.170501289	0.174917381	0.258792705	0.398838989	0.551967378	0.669641497	0.714104871	0.671022923	0.554285366	0.401352825	0.260713722	0.175672304	0.169922447	0.239758967	0.355541837	0.471911949	0.543309459	0.539559831	0.456269929	0.316524438	0.163303059	0.045164494	1.19E-05	-0.04240167	-0.158667134	-0.311496819	-0.452427933	-0.538049997	-0.544467122	-0.47515497	-0.359574008	-0.243014322	-0.17110056	-0.174184022	-0.256886941	-0.396328724	-0.549639803	-0.668240245	-0.714081159	-0.672384405	-0.556593564
0.097967609	0.194992693	0.290141792	0.382499497	0.471177254	0.555321913	0.634123934	0.706825181	0.77272621	0.831193	0.881663054	0.923650812	0.956752317	0.980649106	0.995111274	0.999999683	0.995267302	0.980959662	0.957214412	0.924260001	0.882413476	0.832077435	0.773736149	0.707950909	0.978792119	0.556645715	0.472581438	0.383970553	0.291665567	0.196554527	0.099552477	0.001592653	-0.096382494	-0.193430364	-0.288617281	-0.381027471	-0.469771875	-0.553996702	-0.632891641	-0.705697661	-0.77171431	-0.830306456	-0.880910396	-0.92303928	-0.956287795	-0.980336063	-0.994952721	-0.999997146	-0.995420806	-0.981267729
0.098159859	0.195757843	0.291849015	0.385499035	0.475793265	0.561845728	0.642807838	0.717876804	0.786303634	0.847400656	0.900548471	0.945202284	0.980897527	1.007254736	1.023983611	1.030886225	1.02785935	1.014895859	0.992085195	0.9596129	0.917759193	0.866896618	0.807486771	0.740076137	0.665291084	0.583832037	0.496466908	0.404023834	0.307383284	0.207469631	0.105242247	0.001686226	-0.102197192	-0.205400379	-0.306919194	-0.405762842	-0.500963651	-0.591586649	-0.676738846	-0.755578148	-0.82732178	-0.89125416	-0.94673413	-0.993201475	-1.030182659	-1.057295715	-1.074254254	-1.080870522	-1.077057502	-1.062830016
0.097967609	0.194992693	0.290141792	0.382499497	0.471177254	0.555321913	0.634123934	0.706825181	0.77272621	0.831193	0.881663054	0.923650812	0.956752317	0.980649106	0.995111274	0.999999683	0.995267302	0.980959662	0.957214412	0.924260001	0.882413476	0.832077435	0.773736149	0.707950909	0.635354619	0.556645715	0.472581438	0.383970553	0.291665567	0.196554527	0.099552477	0.001592653	-0.096382494	-0.193430364	-0.288617281	-0.381027471	-0.469771875	-0.553996702	-0.632891641	-0.705697661	-0.77171431	-0.830306456	-0.880910396	-0.92303928	-0.956287795	-0.980336063	-0.994952721	-0.999997146	-0.995420806	-0.981267729
0.066600596	0.241699584	0.459729459	0.637122705	0.702385287	0.625788541	0.452530355	0.379064322	0.561525482	0.780988163	0.901428908	0.902133606	0.831365206	0.768625917	0.754330513	0.758727085	0.754382734	0.768010432	0.830076791	0.901353456	0.902344439	0.783903865	0.565390411	0.380293722	0.44971597	0.623481922	0.702275236	0.639228772	0.463159553	0.245112832	0.068708044	1.81E-05	-0.064522671	-0.238298064	-0.456288391	-0.634986172	-0.702456436	-0.628066595	-0.455366599	-0.377919401	-0.55766521	-0.778044164	-0.900480317	-0.90289409	-0.832656661	-0.769256204	-0.754283019	-0.758723237	-0.754439451	-0.767409733
0.097967609	0.194992693	0.290141792	0.382499497	0.471177254	0.555321913	0.634123934	0.706825181	0.77272621	0.831193	0.881663054	0.923650812	0.956752317	0.980649106	0.995111274	0.999999683	0.995267302	0.980959662	0.957214412	0.924260001	0.882413476	0.832077435	0.773736149	0.707950909	0.635354619	0.556645715	0.472581438	0.383970553	0.291665567	0.196554527	0.099552477	0.001592653	-0.096382494	-0.193430364	-0.288617281	-0.381027471	-0.469771875	-0.553996702	-0.632891641	-0.705697661	-0.77171431	-0.830306456	-0.880910396	-0.92303928	-0.956287795	-0.980336063	-0.994952721	-0.999997146	-0.995420806	-0.981267729
0.097967609	0.194992693	0.290141792	0.382499497	0.471177254	0.555321913	0.634123934	0.706825181	0.77272621	0.831193	0.881663054	0.923650812	0.956752317	0.980649106	0.995111274	0.999999683	0.995267302	0.980959662	0.957214412	0.924260001	0.882413476	0.832077435	0.773736149	0.707950909	0.635354619	0.556645715	0.472581438	0.383970553	0.291665567	0.196554527	0.099552477	0.001592653	-0.096382494	-0.193430364	-0.288617281	-0.381027471	-0.469771875	-0.553996702	-0.632891641	-0.705697661	-0.77171431	-0.830306456	-0.880910396	-0.92303928	-0.956287795	-0.980336063	-0.994952721	-0.999997146	-0.995420806	-0.981267729
0.219837946	0.416735519	0.572312644	0.676307129	0.728351138	0.737587173	0.720229575	0.695640589	0.681825768	0.691383876	0.7288389	0.78995767	0.863188313	0.932850302	0.983285658	1.002945456	0.987396748	0.940494228	0.873409627	0.801742726	0.741420943	0.704408568	0.695310722	0.709751167	0.73497501	0.752581582	0.74276457	0.6890578	0.582450725	0.423881443	0.224500853	0.003633129	-0.215096413	-0.408568119	-0.558805105	-0.656395638	-0.701960065	-0.705391443	-0.683117794	-0.654077788	-0.635369535	-0.638568944	-0.667521148	-0.718039994	-0.77949829	-0.8378611	-0.879401398	-0.894206305	-0.87865493	-0.836302263
0.098131028	0.195646105	0.291606554	0.385085324	0.475175889	0.561000994	0.641721147	0.716542785	0.784726042	0.845592025	0.898529548	0.943001235	0.978548957	1.004798519	1.021463581	1.028348741	1.025351772	1.012464969	0.989775606	0.957465479	0.915809548	0.865173671	0.80601147	0.738860333	0.664336596	0.583129951	0.495997119	0.403754855	0.307272342	0.207463048	0.105276123	0.001687406	-0.102309859	-0.20571452	-0.307527138	-0.406759627	-0.502444839	-0.593645986	-0.679465815	-0.759055445	-0.831622777	-0.896440391	-0.952852865	-1.000283419	-1.038239839	-1.066319603	-1.084214166	-1.09171235	-1.088702809	-1.075175533
0.097967609	0.194992693	0.290141792	0.382499497	0.471177254	0.555321913	0.634123934	0.706825181	0.77272621	0.831193	0.881663054	0.923650812	0.956752317	0.980649106	0.995111274	0.999999683	0.995267302	0.980959662	0.957214412	0.924260001	0.882413476	0.832077435	0.773736149	0.707950909	0.635354619	0.556645715	0.472581438	0.383970553	0.291665567	0.196554527	0.099552477	0.001592653	-0.096382494	-0.193430364	-0.288617281	-0.381027471	-0.469771875	-0.553996702	-0.632891641	-0.705697661	-0.77171431	-0.830306456	-0.880910396	-0.92303928	-0.956287795	-0.980336063	-0.994952721	-0.999997146	-0.995420806	-0.981267729
0.071240568	0.258601971	0.492145458	0.682853574	0.7549808	0.678500456	0.506509211	0.446368862	0.640479636	0.873799828	1.006334871	1.015686211	0.952450532	0.897148621	0.88764152	0.893443521	0.88774111	0.896639188	0.951287465	1.015029184	1.007415267	0.876938341	0.644553076	0.447812171	0.503816883	0.676167718	0.754919171	0.685130339	0.495823666	0.262255462	0.073495017	1.94E-05	-0.069017713	-0.254961088	-0.488455671	-0.680544561	-0.755001581	-0.680804617	-0.509228152	-0.445007429	-0.636411981	-0.870632418	-1.005220406	-1.016323309	-0.953616741	-0.897672072	-0.887545739	-0.893438989	-0.887844283	-0.896143746
0.052018131	0.189889027	0.36521073	0.515737058	0.586460947	0.548302794	0.408104518	0.206556309	0.004745306	0.136153923	0.175218307	0.105305884	0.044770105	0.220145854	0.358547414	0.411383757	0.360185069	0.22284812	0.047584684	0.103388253	0.174921635	0.137670175	0.00182439	0.203105666	0.405175317	0.546772726	0.586742858	0.517643855	0.368021925	0.192596353	0.053667423	1.41E-05	-0.050392152	-0.187191886	-0.362392837	-0.513808641	-0.586149527	-0.549805201	-0.411017089	-0.21000688	-0.007682734	-0.134610068	-0.175485444	-0.107201798	-0.041962362	-0.217433533	-0.356886525	-0.411355513	-0.361799335	-0.225540072
0.097967609	0.194992693	0.290141792	0.382499497	0.471177254	0.555321913	0.634123934	0.706825181	0.77272621	0.831193	0.881663054	0.923650812	0.956752317	0.980649106	0.995111274	0.999999683	0.995267302	0.980959662	0.957214412	0.924260001	0.882413476	0.832077435	0.773736149	0.707950909	0.635354619	0.556645715	0.472581438	0.383970553	0.291665567	0.196554527	0.099552477	0.001592653	-0.096382494	-0.193430364	-0.288617281	-0.381027471	-0.469771875	-0.553996702	-0.632891641	-0.705697661	-0.77171431	-0.830306456	-0.880910396	-0.92303928	-0.956287795	-0.980336063	-0.994952721	-0.999997146	-0.995420806	-0.981267729
0.176513265	0.338054654	0.472568562	0.573190977	0.639386249	0.67670289	0.695216222	0.707021768	0.72335784	0.752019182	0.795654643	0.851334688	0.911475078	0.965880528	1.004402806	1.01955727	1.008448778	0.97352369	0.921951512	0.863779201	0.809310012	0.76635964	0.738083353	0.721936203	0.710054709	0.690999552	0.652461119	0.58428769	0.481110161	0.343929163	0.180277084	0.002907381	-0.172687462	-0.331355003	-0.461252731	-0.556040479	-0.615821678	-0.64666024	-0.658831536	-0.664249824	-0.673685735	-0.694411044	-0.728784532	-0.774057265	-0.823386368	-0.867771273	-0.898426266	-0.90901937	-0.897254115	-0.865432752
0.097967609	0.194992693	0.290141792	0.382499497	0.471177254	0.555321913	0.634123934	0.706825181	0.77272621	0.831193	0.881663054	0.923650812	0.956752317	0.980649106	0.995111274	0.999999683	0.995267302	0.980959662	0.957214412	0.924260001	0.882413476	0.832077435	0.773736149	0.707950909	0.635354619	0.556645715	0.472581438	0.383970553	0.291665567	0.196554527	0.099552477	0.001592653	-0.096382494	-0.193430364	-0.288617281	-0.381027471	-0.469771875	-0.553996702	-0.632891641	-0.705697661	-0.77171431	-0.830306456	-0.880910396	-0.92303928	-0.956287795	-0.980336063	-0.994952721	-0.999997146	-0.995420806	-0.981267729
0.098159859	0.195757843	0.291849015	0.385499035	0.475793265	0.561845728	0.642807838	0.717876804	0.786303634	0.847400656	0.900548471	0.945202284	0.980897527	1.007254736	1.023983611	1.030886225	1.02785935	1.014895859	0.992085195	0.9596129	0.917759193	0.866896618	0.807486771	0.740076137	0.665291084	0.583832037	0.496466908	0.404023834	0.307383284	0.207469631	0.105242247	0.001686226	-0.102197192	-0.205400379	-0.306919194	-0.405762842	-0.500963651	-0.591586649	-0.676738846	-0.755578148	-0.82732178	-0.89125416	-0.94673413	-0.993201475	-1.030182659	-1.057295715	-1.074254254	-1.080870522	-1.077057502	-1.062830016
0.097967609	0.194992693	0.290141792	0.382499497	0.471177254	0.555321913	0.634123934	0.706825181	0.77272621	0.831193	0.881663054	0.923650812	0.956752317	0.980649106	0.995111274	0.999999683	0.995267302	0.980959662	0.957214412	0.924260001	0.882413476	0.832077435	0.773736149	0.707950909	0.980104619	0.556645715	0.472581438	0.383970553	0.291665567	0.196554527	0.099552477	0.001592653	-0.096382494	-0.193430364	-0.288617281	-0.381027471	-0.469771875	-0.553996702	-0.632891641	-0.705697661	-0.77171431	-0.830306456	-0.880910396	-0.92303928	-0.956287795	-0.980336063	-0.994952721	-0.999997146	-0.995420806	-0.981267729
0.098159859	0.195757843	0.291849015	0.385499035	0.475793265	0.561845728	0.642807838	0.717876804	0.786303634	0.847400656	0.900548471	0.945202284	0.980897527	1.007254736	1.023983611	1.030886225	1.02785935	1.014895859	0.992085195	0.9596129	0.917759193	0.866896618	0.807486771	0.740076137	0.665291084	0.583832037	0.496466908	0.404023834	0.307383284	0.207469631	0.105242247	0.001686226	-0.102197192	-0.205400379	-0.306919194	-0.405762842	-0.500963651	-0.591586649	-0.676738846	-0.755578148	-0.82732178	-0.89125416	-0.94673413	-0.993201475	-1.030182659	-1.057295715	-1.074254254	-1.080870522	-1.077057502	-1.062830016
0.098142809	0.195693208	0.291712146	0.385271731	0.475464143	0.561410388	0.642268815	0.717243308	0.785591086	0.846630023	0.89974542	0.944396169	0.980120234	1.006539403	1.023363267	1.03039237	1.027520502	1.014736125	0.992122878	0.959859197	0.918217005	0.867559514	0.808338135	0.741088533	0.66642585	0.585039148	0.49768511	0.405181067	0.308397403	0.208249422	0.105688729	0.001694236	-0.102737151	-0.206600061	-0.308890313	-0.408614608	-0.504800169	-0.596504225	-0.682823256	-0.762901904	-0.835941461	-0.901207857	-0.958039057	-1.005851798	-1.044147601	-1.072517988	-1.090648848	-1.098323919	-1.095427326	-1.081945163
0.097967609	0.194992693	0.290141792	0.382499497	0.471177254	0.555321913	0.634123934	0.706825181	0.77272621	0.831193	0.881663054	0.923650812	0.956752317	0.980649106	0.995111274	0.999999683	0.995267302	0.980959662	0.957214412	0.924260001	0.882413476	0.832077435	0.773736149	0.707950909	0.635354619	0.556645715	0.472581438	0.383970553	0.291665567	0.196554527	0.099552477	0.001592653	-0.096382494	-0.193430364	-0.288617281	-0.381027471	-0.469771875	-0.553996702	-0.632891641	-0.705697661	-0.77171431	-0.830306456	-0.880910396	-0.92303928	-0.956287795	-0.980336063	-0.994952721	-0.999997146	-0.995420806	-0.981267729
0.098159859	0.195757843	0.291849015	0.385499035	0.475793265	0.561845728	0.642807838	0.717876804	0.786303634	0.847400656	0.900548471	0.945202284	0.980897527	1.007254736	1.023983611	1.030886225	1.02785935	1.014895859	0.992085195	0.9596129	0.917759193	0.866896618	0.807486771	0.740076137	0.665291084	0.583832037	0.496466908	0.404023834	0.307383284	0.207469631	0.105242247	0.001686226	-0.102197192	-0.205400379	-0.306919194	-0.405762842	-0.500963651	-0.591586649	-0.676738846	-0.755578148	-0.82732178	-0.89125416	-0.94673413	-0.993201475	-1.030182659	-1.057295715	-1.074254254	-1.080870522	-1.077057502	-1.062830016
0.217782648	0.413005844	0.567591815	0.671440733	0.724176601	0.734769914	0.719141307	0.696305394	0.683943985	0.694425992	0.73218562	0.793051937	0.865662714	0.934599657	0.984468204	1.003913741	0.988576831	0.942244813	0.875898041	0.804870786	0.74482157	0.707516369	0.697491069	0.710457122	0.733893679	0.749733121	0.738527795	0.684113664	0.577654497	0.420091568	0.22240292	0.003598692	-0.213084541	-0.404907954	-0.554187854	-0.651659244	-0.697917618	-0.7026728	-0.682058479	-0.654677325	-0.637324787	-0.641370887	-0.670589632	-0.720863568	-0.781746447	-0.839444071	-0.880465706	-0.89506972	-0.879698563	-0.837847332
0.097967609	0.194992693	0.290141792	0.382499497	0.471177254	0.555321913	0.634123934	0.706825181	0.77272621	0.831193	0.881663054	0.923650812	0.956752317	0.980649106	0.995111274	0.999999683	0.995267302	0.980959662	0.957214412	0.924260001	0.882413476	0.832077435	0.773736149	0.707950909	0.635354619	0.556645715	0.472581438	0.383970553	0.291665567	0.196554527	0.099552477	0.001592653	-0.096382494	-0.193430364	-0.288617281	-0.381027471	-0.469771875	-0.553996702	-0.632891641	-0.705697661	-0.77171431	-0.830306456	-0.880910396	-0.92303928	-0.956287795	-0.980336063	-0.994952721	-0.999997146	-0.995420806	-0.981267729
0.212783151	0.403932196	0.556103735	0.6595924	0.714002419	0.727886537	0.716452006	0.69786907	0.6890332	0.701755029	0.740250721	0.800500569	0.871603045	0.938776867	0.987267364	1.00619194	0.991369733	0.946424474	0.881871637	0.812400544	0.753016519	0.715003787	0.702730012	0.712119603	0.731220173	0.742773033	0.728201682	0.672075918	0.565982867	0.410871434	0.217299705	0.003514927	-0.208190684	-0.396003438	-0.542951896	-0.640127557	-0.688065601	-0.696030812	-0.679441976	-0.656085622	-0.642022045	-0.648121176	-0.677984277	-0.727660773	-0.787143962	-0.843224416	-0.88298538	-0.897101186	-0.882168149	-0.841535872
0.097967609	0.194992693	0.290141792	0.382499497	0.471177254	0.555321913	0.634123934	0.706825181	0.77272621	0.831193	0.881663054	0.923650812	0.956752317	0.980649106	0.995111274	0.999999683	0.995267302	0.980959662	0.957214412	0.924260001	0.882413476	0.832077435	0.773736149	0.707950909	0.635354619	0.556645715	0.472581438	0.383970553	0.291665567	0.196554527	0.099552477	0.001592653	-0.096382494	-0.193430364	-0.288617281	-0.381027471	-0.469771875	-0.553996702	-0.632891641	-0.705697661	-0.77171431	-0.830306456	-0.880910396	-0.92303928	-0.956287795	-0.980336063	-0.994952721	-0.999997146	-0.995420806	-0.981267729
0.259405778	0.468249611	0.594583001	0.636007432	0.618573128	0.584445183	0.573882212	0.60931726	0.688137119	0.786718209	0.873244137	0.923063743	0.929503145	0.905429855	0.875322961	0.862048358	0.874924703	0.904917755	0.929298962	0.92350401	0.874391614	0.788302951	0.689662948	0.610291048	0.574062748	0.583994195	0.618030946	0.636092875	0.595896889	0.471007838	0.263319284	0.004358173	-0.255478519	-0.465468961	-0.593246085	-0.635906111	-0.619110959	-0.584902798	-0.573714378	-0.608355391	-0.686616683	-0.785130119	-0.872086566	-0.922611589	-0.929699017	-0.905940404	-0.875725975	-0.86205568	-0.874531277	-0.904404222
0.097967609	0.194992693	0.290141792	0.382499497	0.471177254	0.555321913	0.634123934	0.706825181	0.77272621	0.831193	0.881663054	0.923650812	0.956752317	0.980649106	0.995111274	0.999999683	0.995267302	0.980959662	0.957214412	0.924260001	0.882413476	0.832077435	0.773736149	0.707950909	0.866967119	0.556645715	0.472581438	0.383970553	0.291665567	0.196554527	0.099552477	0.001592653	-0.096382494	-0.193430364	-0.288617281	-0.381027471	-0.469771875	-0.553996702	-0.632891641	-0.705697661	-0.77171431	-0.830306456	-0.880910396	-0.92303928	-0.956287795	-0.980336063	-0.994952721	-0.999997146	-0.995420806	-0.981267729
0.098151753	0.19572897	0.291792314	0.385413255	0.475682991	0.561721209	0.642684616	0.71777516	0.786247846	0.847418093	0.900668537	0.945455233	0.981313181	1.007861119	1.02480555	1.031943936	1.029167049	1.016460434	0.993904978	0.961676559	0.920044798	0.869370897	0.810104588	0.742780229	0.668012056	0.586488651	0.498966668	0.406263877	0.309251574	0.208846454	0.106001989	0.001699422	-0.10306156	-0.207272383	-0.309925264	-0.410022949	-0.506588385	-0.598674261	-0.685372297	-0.765822217	-0.839220298	-0.904827419	-0.961976524	-1.01007943	-1.0486329	-1.077223934	-1.095534197	-1.103343564	-1.100532723	-1.08708481
0.071496051	0.259532524	0.493929615	0.685369064	0.757869651	0.681383058	0.50941459	0.449903054	0.644690048	0.878796338	1.011988636	1.021780431	0.958893802	0.903926099	0.894644102	0.900517539	0.894746036	0.903421496	0.95773637	1.021129357	1.013077755	0.881947196	0.648775679	0.451357613	0.506727524	0.679048531	0.757810571	0.687655182	0.497621467	0.263199239	0.073758594	1.94E-05	-0.069265217	-0.255878466	-0.49022615	-0.683050599	-0.757887773	-0.683689001	-0.5121285	-0.448530303	-0.640610252	-0.875616544	-1.010865385	-1.022411554	-0.960054377	-0.904444688	-0.894545935	-0.900512972	-0.894851511	-0.902930853
0.097967609	0.194992693	0.290141792	0.382499497	0.471177254	0.555321913	0.634123934	0.706825181	0.77272621	0.831193	0.881663054	0.923650812	0.956752317	0.980649106	0.995111274	0.999999683	0.995267302	0.980959662	0.957214412	0.924260001	0.882413476	0.832077435	0.773736149	0.707950909	0.635354619	0.556645715	0.472581438	0.383970553	0.291665567	0.196554527	0.099552477	0.001592653	-0.096382494	-0.193430364	-0.288617281	-0.381027471	-0.469771875	-0.553996702	-0.632891641	-0.705697661	-0.77171431	-0.830306456	-0.880910396	-0.92303928	-0.956287795	-0.980336063	-0.994952721	-0.999997146	-0.995420806	-0.981267729
0.098112524	0.19557212	0.291440702	0.384792534	0.47472313	0.560357961	0.640860926	0.715442476	0.783367319	0.843961646	0.896619781	0.940810217	0.976080957	1.002064119	1.01847975	1.025138821	1.021945354	1.008897672	0.986088752	0.953705675	0.912028162	0.861426235	0.802356985	0.735360507	0.661055012	0.580131182	0.493345798	0.401514709	0.305505211	0.206227893	0.104628043	0.001676677	-0.101638712	-0.204323604	-0.305386004	-0.403846015	-0.49874533	-0.589156559	-0.674192293	-0.753013826	-0.824839434	-0.888952148	-0.944706931	-0.991537185	-1.028960536	-1.05658382	-1.07410723	-1.081327579	-1.078140633	-1.064542498
0.066631232	0.241811202	0.459943583	0.637424963	0.702733434	0.626139021	0.452895248	0.379531707	0.562064536	0.781615434	0.902137101	0.902903583	0.83219384	0.769514216	0.75525592	0.759662601	0.755308491	0.768899575	0.830906427	0.902124356	0.903053766	0.784532595	0.565930741	0.38076259	0.450081863	0.623832272	0.702623717	0.639532163	0.463375317	0.245226036	0.068739651	1.81E-05	-0.064552351	-0.2384081	-0.45650087	-0.635287286	-0.702804237	-0.628417204	-0.455730529	-0.378385275	-0.558202998	-0.778669972	-0.90118737	-0.903663143	-0.833484293	-0.770143653	-0.755208069	-0.759658749	-0.755365552	-0.768299713
0.097967609	0.194992693	0.290141792	0.382499497	0.471177254	0.555321913	0.634123934	0.706825181	0.77272621	0.831193	0.881663054	0.923650812	0.956752317	0.980649106	0.995111274	0.999999683	0.995267302	0.980959662	0.957214412	0.924260001	0.882413476	0.832077435	0.773736149	0.707950909	0.442767119	0.556645715	0.472581438	0.383970553	0.291665567	0.196554527	0.099552477	0.001592653	-0.096382494	-0.193430364	-0.288617281	-0.381027471	-0.469771875	-0.553996702	-0.632891641	-0.705697661	-0.77171431	-0.830306456	-0.880910396	-0.92303928	-0.956287795	-0.980336063	-0.994952721	-0.999997146	-0.995420806	-0.981267729
0.098150232	0.195722889	0.291778682	0.38538919	0.475645778	0.561668357	0.642613913	0.717684724	0.78613617	0.847284089	0.900511569	0.945275149	0.981110331	1.007636374	1.024560303	1.031680107	1.028887069	1.016167232	0.993601949	0.961367534	0.919733999	0.869062888	0.80980422	0.742492573	0.667742337	0.586242177	0.498748752	0.406079755	0.309106331	0.208744934	0.105948722	0.001698541	-0.103006398	-0.207158061	-0.30974928	-0.409783474	-0.506284316	-0.598305267	-0.684938857	-0.765325645	-0.838662763	-0.904211947	-0.961306995	-1.009360561	-1.047870218	-1.076423732	-1.09470349	-1.102490021	-1.099664599	-1.086210862
0.019561968	0.074081263	0.152368153	0.239702487	0.322343479	0.39155516	0.445815086	0.490490726	0.535124586	0.589277095	0.658363309	0.740921574	0.828268728	0.906690077	0.961454886	0.981328398	0.962078256	0.907805231	0.829653795	0.742333211	0.659610079	0.59027303	0.535905317	0.491187244	0.446594511	0.392549047	0.323588395	0.241113442	0.153754392	0.075199581	0.020190019	5.25E-06	-0.018943287	-0.072969288	-0.150984275	-0.23829018	-0.32109486	-0.390557175	-0.44503304	-0.489794197	-0.534346458	-0.588285252	-0.657120254	-0.739511314	-0.826881334	-0.905568611	-0.960822163	-0.9813179	-0.962692238	-0.908914013
0.097967609	0.194992693	0.290141792	0.382499497	0.471177254	0.555321913	0.634123934	0.706825181	0.77272621	0.831193	0.881663054	0.923650812	0.956752317	0.980649106	0.995111274	0.999999683	0.995267302	0.980959662	0.957214412	0.924260001	0.882413476	0.832077435	0.773736149	0.707950909	0.635354619	0.556645715	0.472581438	0.383970553	0.291665567	0.196554527	0.099552477	0.001592653	-0.096382494	-0.193430364	-0.288617281	-0.381027471	-0.469771875	-0.553996702	-0.632891641	-0.705697661	-0.77171431	-0.830306456	-0.880910396	-0.92303928	-0.956287795	-0.980336063	-0.994952721	-0.999997146	-0.995420806	-0.981267729
0.097967609	0.194992693	0.290141792	0.382499497	0.471177254	0.555321913	0.634123934	0.706825181	0.77272621	0.831193	0.881663054	0.923650812	0.956752317	0.980649106	0.995111274	0.999999683	0.995267302	0.980959662	0.957214412	0.924260001	0.882413476	0.832077435	0.773736149	0.707950909	0.635354619	0.556645715	0.472581438	0.383970553	0.291665567	0.196554527	0.099552477	0.001592653	-0.096382494	-0.193430364	-0.288617281	-0.381027471	-0.469771875	-0.553996702	-0.632891641	-0.705697661	-0.77171431	-0.830306456	-0.880910396	-0.92303928	-0.956287795	-0.980336063	-0.994952721	-0.999997146	-0.995420806	-0.981267729
0.097967609	0.194992693	0.290141792	0.382499497	0.471177254	0.555321913	0.634123934	0.706825181	0.77272621	0.831193	0.881663054	0.923650812	0.956752317	0.980649106	0.995111274	0.999999683	0.995267302	0.980959662	0.957214412	0.924260001	0.882413476	0.832077435	0.773736149	0.707950909	0.635354619	0.556645715	0.472581438	0.383970553	0.291665567	0.196554527	0.099552477	0.001592653	-0.096382494	-0.193430364	-0.288617281	-0.381027471	-0.469771875	-0.553996702	-0.632891641	-0.705697661	-0.77171431	-0.830306456	-0.880910396	-0.92303928	-0.956287795	-0.980336063	-0.994952721	-0.999997146	-0.995420806	-0.981267729
0.098085379	0.19546358	0.291197386	0.384362996	0.474058906	0.559414593	0.639598933	0.713828258	0.781373995	0.841569785	0.893818042	0.937595866	0.972460258	0.998052594	1.014102297	1.020429682	1.016947941	1.00366424	0.980679924	0.948189823	0.90648065	0.85592853	0.796995644	0.730226058	0.656240737	0.575731814	0.489456156	0.398228285	0.302912727	0.204415849	0.103677273	0.001660938	-0.100654102	-0.20228305	-0.302244837	-0.399571577	-0.493317935	-0.582570309	-0.666455731	-0.74415042	-0.814887876	-0.877966461	-0.932756372	-0.978705951	-1.015347259	-1.042300861	-1.05927977	-1.066092518	-1.062645306	-1.048943218
0.186162855	0.344427498	0.457009798	0.522184029	0.553688802	0.574031875	0.604705655	0.657544342	0.730805389	0.811364701	0.881681304	0.928141566	0.94693392	0.944900206	0.935230004	0.930278631	0.935085783	0.944765553	0.947036533	0.928662177	0.882651294	0.812634114	0.732100793	0.658593406	0.60537236	0.574398594	0.554043129	0.522910149	0.458427507	0.346647286	0.189020775	0.003103038	-0.183297351	-0.342195303	-0.455579241	-0.521448836	-0.553331559	-0.573668105	-0.604045106	-0.656500924	-0.729512009	-0.810092496	-0.880704798	-0.927613416	-0.946825673	-0.945032866	-0.93537564	-0.930281436	-0.934943022	-0.944628973
0.097967609	0.194992693	0.290141792	0.382499497	0.471177254	0.555321913	0.634123934	0.706825181	0.77272621	0.831193	0.881663054	0.923650812	0.956752317	0.980649106	0.995111274	0.999999683	0.995267302	0.980959662	0.957214412	0.924260001	0.882413476	0.832077435	0.773736149	0.707950909	0.635354619	0.556645715	0.472581438	0.383970553	0.291665567	0.196554527	0.099552477	0.001592653	-0.096382494	-0.193430364	-0.288617281	-0.381027471	-0.469771875	-0.553996702	-0.632891641	-0.705697661	-0.77171431	-0.830306456	-0.880910396	-0.92303928	-0.956287795	-0.980336063	-0.994952721	-0.999997146	-0.995420806	-0.981267729
0.098159859	0.195757843	0.291849015	0.385499035	0.475793265	0.561845728	0.642807838	0.717876804	0.786303634	0.847400656	0.900548471	0.945202284	0.980897527	1.007254736	1.023983611	1.030886225	1.02785935	1.014895859	0.992085195	0.9596129	0.917759193	0.866896618	0.807486771	0.740076137	0.665291084	0.583832037	0.496466908	0.404023834	0.307383284	0.207469631	0.105242247	0.001686226	-0.102197192	-0.205400379	-0.306919194	-0.405762842	-0.500963651	-0.591586649	-0.676738846	-0.755578148	-0.82732178	-0.89125416	-0.94673413	-0.993201475	-1.030182659	-1.057295715	-1.074254254	-1.080870522	-1.077057502	-1.062830016
0.097967609	0.194992693	0.290141792	0.382499497	0.471177254	0.555321913	0.634123934	0.706825181	0.77272621	0.831193	0.881663054	0.923650812	0.956752317	0.980649106	0.995111274	0.999999683	0.995267302	0.980959662	0.957214412	0.924260001	0.882413476	0.832077435	0.773736149	0.707950909	0.846942119	0.556645715	0.472581438	0.383970553	0.291665567	0.196554527	0.099552477	0.001592653	-0.096382494	-0.193430364	-0.288617281	-0.381027471	-0.469771875	-0.553996702	-0.632891641	-0.705697661	-0.77171431	-0.830306456	-0.880910396	-0.92303928	-0.956287795	-0.980336063	-0.994952721	-0.999997146	-0.995420806	-0.981267729
0.098159859	0.195757843	0.291849015	0.385499035	0.475793265	0.561845728	0.642807838	0.717876804	0.786303634	0.847400656	0.900548471	0.945202284	0.980897527	1.007254736	1.023983611	1.030886225	1.02785935	1.014895859	0.992085195	0.9596129	0.917759193	0.866896618	0.807486771	0.740076137	0.665291084	0.583832037	0.496466908	0.404023834	0.307383284	0.207469631	0.105242247	0.001686226	-0.102197192	-0.205400379	-0.306919194	-0.405762842	-0.500963651	-0.591586649	-0.676738846	-0.755578148	-0.82732178	-0.89125416	-0.94673413	-0.993201475	-1.030182659	-1.057295715	-1.074254254	-1.080870522	-1.077057502	-1.062830016
0.098159859	0.195757843	0.291849015	0.385499035	0.475793265	0.561845728	0.642807838	0.717876804	0.786303634	0.847400656	0.900548471	0.945202284	0.980897527	1.007254736	1.023983611	1.030886225	1.02785935	1.014895859	0.992085195	0.9596129	0.917759193	0.866896618	0.807486771	0.740076137	0.665291084	0.583832037	0.496466908	0.404023834	0.307383284	0.207469631	0.105242247	0.001686226	-0.102197192	-0.205400379	-0.306919194	-0.405762842	-0.500963651	-0.591586649	-0.676738846	-0.755578148	-0.82732178	-0.89125416	-0.94673413	-0.993201475	-1.030182659	-1.057295715	-1.074254254	-1.080870522	-1.077057502	-1.062830016
0.098159859	0.195757843	0.291849015	0.385499035	0.475793265	0.561845728	0.642807838	0.717876804	0.786303634	0.847400656	0.900548471	0.945202284	0.980897527	1.007254736	1.023983611	1.030886225	1.02785935	1.014895859	0.992085195	0.9596129	0.917759193	0.866896618	0.807486771	0.740076137	0.665291084	0.583832037	0.496466908	0.404023834	0.307383284	0.207469631	0.105242247	0.001686226	-0.102197192	-0.205400379	-0.306919194	-0.405762842	-0.500963651	-0.591586649	-0.676738846	-0.755578148	-0.82732178	-0.89125416	-0.94673413	-0.993201475	-1.030182659	-1.057295715	-1.074254254	-1.080870522	-1.077057502	-1.062830016
0.097967609	0.194992693	0.290141792	0.382499497	0.471177254	0.555321913	0.634123934	0.706825181	0.77272621	0.831193	0.881663054	0.923650812	0.956752317	0.980649106	0.995111274	0.999999683	0.995267302	0.980959662	0.957214412	0.924260001	0.882413476	0.832077435	0.773736149	0.707950909	0.635354619	0.556645715	0.472581438	0.383970553	0.291665567	0.196554527	0.099552477	0.001592653	-0.096382494	-0.193430364	-0.288617281	-0.381027471	-0.469771875	-0.553996702	-0.632891641	-0.705697661	-0.77171431	-0.830306456	-0.880910396	-0.92303928	-0.956287795	-0.980336063	-0.994952721	-0.999997146	-0.995420806	-0.981267729
0.098159859	0.195757843	0.291849015	0.385499035	0.475793265	0.561845728	0.642807838	0.717876804	0.786303634	0.847400656	0.900548471	0.945202284	0.980897527	1.007254736	1.023983611	1.030886225	1.02785935	1.014895859	0.992085195	0.9596129	0.917759193	0.866896618	0.807486771	0.740076137	0.665291084	0.583832037	0.496466908	0.404023834	0.307383284	0.207469631	0.105242247	0.001686226	-0.102197192	-0.205400379	-0.306919194	-0.405762842	-0.500963651	-0.591586649	-0.676738846	-0.755578148	-0.82732178	-0.89125416	-0.94673413	-0.993201475	-1.030182659	-1.057295715	-1.074254254	-1.080870522	-1.077057502	-1.062830016
0.097967609	0.194992693	0.290141792	0.382499497	0.471177254	0.555321913	0.634123934	0.706825181	0.77272621	0.831193	0.881663054	0.923650812	0.956752317	0.980649106	0.995111274	0.999999683	0.995267302	0.980959662	0.957214412	0.924260001	0.882413476	0.832077435	0.773736149	0.707950909	0.635354619	0.556645715	0.472581438	0.383970553	0.291665567	0.196554527	0.099552477	0.001592653	-0.096382494	-0.193430364	-0.288617281	-0.381027471	-0.469771875	-0.553996702	-0.632891641	-0.705697661	-0.77171431	-0.830306456	-0.880910396	-0.92303928	-0.956287795	-0.980336063	-0.994952721	-0.999997146	-0.995420806	-0.981267729
0.097967609	0.194992693	0.290141792	0.382499497	0.471177254	0.555321913	0.634123934	0.706825181	0.77272621	0.831193	0.881663054	0.923650812	0.956752317	0.980649106	0.995111274	0.999999683	0.995267302	0.980959662	0.957214412	0.924260001	0.882413476	0.832077435	0.773736149	0.707950909	0.468417119	0.556645715	0.472581438	0.383970553	0.291665567	0.196554527	0.099552477	0.001592653	-0.096382494	-0.193430364	-0.288617281	-0.381027471	-0.469771875	-0.553996702	-0.632891641	-0.705697661	-0.77171431	-0.830306456	-0.880910396	-0.92303928	-0.956287795	-0.980336063	-0.994952721	-0.999997146	-0.995420806	-0.981267729
0.097967609	0.194992693	0.290141792	0.382499497	0.471177254	0.555321913	0.634123934	0.706825181	0.77272621	0.831193	0.881663054	0.923650812	0.956752317	0.980649106	0.995111274	0.999999683	0.995267302	0.980959662	0.957214412	0.924260001	0.882413476	0.832077435	0.773736149	0.707950909	0.635354619	0.556645715	0.472581438	0.383970553	0.291665567	0.196554527	0.099552477	0.001592653	-0.096382494	-0.193430364	-0.288617281	-0.381027471	-0.469771875	-0.553996702	-0.632891641	-0.705697661	-0.77171431	-0.830306456	-0.880910396	-0.92303928	-0.956287795	-0.980336063	-0.994952721	-0.999997146	-0.995420806	-0.981267729
0.177580665	0.329901833	0.440828715	0.508714427	0.545864958	0.572500342	0.60792897	0.662751718	0.735327791	0.813755651	0.88215638	0.92820145	0.948412714	0.948930774	0.94163119	0.937645872	0.941516451	0.94883988	0.948550774	0.928731064	0.883105278	0.814987849	0.736595791	0.663808896	0.60865156	0.572961485	0.546322836	0.50951428	0.442257633	0.332058045	0.180314797	0.002956018	-0.174839665	-0.327734379	-0.439388134	-0.507906295	-0.545404333	-0.572041721	-0.607211775	-0.661699455	-0.734061423	-0.812520727	-0.881201384	-0.927664805	-0.948269332	-0.949019627	-0.941746957	-0.937648153	-0.94140278	-0.948747002
0.072314408	0.262513169	0.499644112	0.693424982	0.767118543	0.690603919	0.518680028	0.461124112	0.658094454	0.89473111	1.030023188	1.041204831	0.979398859	0.925460334	0.916878574	0.922977538	0.916987871	0.924970659	0.978258771	1.040572344	1.031140034	0.897921544	0.662219516	0.462614395	0.516008964	0.68826344	0.767067556	0.695741029	0.503379659	0.266222238	0.074602876	1.97E-05	-0.070058013	-0.258816911	-0.495896845	-0.69107627	-0.767128223	-0.692915784	-0.521378657	-0.459715451	-0.653975382	-0.891511603	-1.028872006	-1.041817289	-0.980542096	-0.925963902	-0.916772915	-0.922972856	-0.917100582	-0.924494846
0.069259621	0.251386328	0.478309176	0.663340611	0.732557237	0.65608269	0.483760218	0.418412855	0.607384095	0.834680601	0.962090173	0.967910533	0.901758685	0.843629624	0.832257542	0.837486936	0.832338134	0.843079604	0.90054792	0.967204686	0.963101769	0.837723621	0.6113652	0.419767236	0.481022374	0.653762649	0.732475444	0.6655447	0.48188153	0.254937271	0.071451312	1.88E-05	-0.067098641	-0.247847618	-0.474725503	-0.661105038	-0.732599021	-0.658374191	-0.486522792	-0.417141117	-0.603408348	-0.831608977	-0.961044969	-0.968596602	-0.902972567	-0.844193944	-0.832181109	-0.837482689	-0.832422659	-0.842543861
0.05963005	0.216298422	0.410976013	0.568225709	0.622810669	0.54500166	0.36546471	0.259344959	0.429823593	0.631388085	0.732965662	0.717108617	0.627706941	0.544291463	0.517565544	0.519096752	0.517511375	0.543381493	0.626080314	0.71605704	0.733599928	0.633980709	0.433467902	0.260196442	0.362317545	0.542704664	0.62261858	0.570071741	0.414032048	0.219350407	0.061516636	1.62E-05	-0.057769874	-0.213256829	-0.407909888	-0.566351835	-0.622966632	-0.547269453	-0.368622575	-0.258592951	-0.426180426	-0.628767196	-0.73229913	-0.7181399	-0.629335677	-0.545218772	-0.517627073	-0.51909412	-0.517464302	-0.542488896
0.097967609	0.194992693	0.290141792	0.382499497	0.471177254	0.555321913	0.634123934	0.706825181	0.77272621	0.831193	0.881663054	0.923650812	0.956752317	0.980649106	0.995111274	0.999999683	0.995267302	0.980959662	0.957214412	0.924260001	0.882413476	0.832077435	0.773736149	0.707950909	0.635354619	0.556645715	0.472581438	0.383970553	0.291665567	0.196554527	0.099552477	0.001592653	-0.096382494	-0.193430364	-0.288617281	-0.381027471	-0.469771875	-0.553996702	-0.632891641	-0.705697661	-0.77171431	-0.830306456	-0.880910396	-0.92303928	-0.956287795	-0.980336063	-0.994952721	-0.999997146	-0.995420806	-0.981267729
0.060198193	0.218369256	0.414952682	0.573851749	0.629326775	0.551674748	0.372927408	0.270505764	0.441418446	0.644204183	0.747356671	0.733093124	0.645761057	0.564837905	0.539605428	0.541436283	0.539563141	0.563964105	0.644173944	0.732069797	0.748016035	0.646822121	0.445072933	0.271392248	0.369817725	0.549378674	0.62914188	0.575719168	0.418039276	0.221450705	0.062102782	1.64E-05	-0.058320269	-0.215298308	-0.411855928	-0.571956275	-0.629475325	-0.553941712	-0.376049033	-0.269716432	-0.437765567	-0.641558041	-0.746665027	-0.73409629	-0.647350443	-0.565728733	-0.539654742	-0.541433537	-0.539527622	-0.563107359
0.097967609	0.194992693	0.290141792	0.382499497	0.471177254	0.555321913	0.634123934	0.706825181	0.77272621	0.831193	0.881663054	0.923650812	0.956752317	0.980649106	0.995111274	0.999999683	0.995267302	0.980959662	0.957214412	0.924260001	0.882413476	0.832077435	0.773736149	0.707950909	0.635354619	0.556645715	0.472581438	0.383970553	0.291665567	0.196554527	0.099552477	0.001592653	-0.096382494	-0.193430364	-0.288617281	-0.381027471	-0.469771875	-0.553996702	-0.632891641	-0.705697661	-0.77171431	-0.830306456	-0.880910396	-0.92303928	-0.956287795	-0.980336063	-0.994952721	-0.999997146	-0.995420806	-0.981267729
0.207450786	0.380443058	0.497092315	0.555477272	0.572899011	0.577553823	0.596364774	0.644232938	0.719163137	0.804991886	0.880046041	0.927516996	0.942764389	0.934373744	0.918801895	0.911446048	0.918584292	0.934130134	0.94277863	0.928014911	0.881068087	0.806353372	0.720526155	0.645261245	0.596891896	0.577685088	0.572995151	0.556019311	0.49848137	0.382820112	0.210615668	0.003467762	-0.204276534	-0.378050697	-0.495687465	-0.554924191	-0.572799539	-0.577426569	-0.595845702	-0.643212091	-0.717803115	-0.803627445	-0.879016442	-0.927010281	-0.942743736	-0.934615489	-0.919021877	-0.911450158	-0.918369123	-0.933884736
0.097967609	0.194992693	0.290141792	0.382499497	0.471177254	0.555321913	0.634123934	0.706825181	0.77272621	0.831193	0.881663054	0.923650812	0.956752317	0.980649106	0.995111274	0.999999683	0.995267302	0.980959662	0.957214412	0.924260001	0.882413476	0.832077435	0.773736149	0.707950909	0.635354619	0.556645715	0.472581438	0.383970553	0.291665567	0.196554527	0.099552477	0.001592653	-0.096382494	-0.193430364	-0.288617281	-0.381027471	-0.469771875	-0.553996702	-0.632891641	-0.705697661	-0.77171431	-0.830306456	-0.880910396	-0.92303928	-0.956287795	-0.980336063	-0.994952721	-0.999997146	-0.995420806	-0.981267729
0.050986296	0.186351313	0.359254132	0.50942784	0.58355168	0.55331138	0.42506218	0.237835781	0.05035669	0.078566175	0.109676276	0.036328745	0.11341917	0.286384744	0.422273837	0.474062443	0.423879651	0.289041886	0.116205908	0.034389979	0.109288206	0.079918137	0.047654752	0.234624479	0.422352277	0.551946145	0.583925598	0.511356278	0.362037763	0.189013523	0.052603542	1.38E-05	-0.049391951	-0.183699301	-0.356464353	-0.507478793	-0.58314947	-0.554650043	-0.427756094	-0.241047014	-0.053074502	-0.077187695	-0.11003603	-0.038246806	-0.110638712	-0.283717529	-0.420645197	-0.474034771	-0.425462489	-0.291688705
0.098103629	0.195536552	0.291360967	0.384651774	0.474505463	0.560048818	0.640447369	0.714913495	0.782714104	0.84317783	0.895701648	0.93975687	0.974894449	1.000749537	1.017045254	1.023595631	1.020307696	1.00718267	0.984316273	0.951898123	0.910210236	0.859624631	0.800600068	0.733677942	0.659477368	0.578689504	0.492071158	0.400437744	0.304655651	0.205634084	0.104316475	0.001671519	-0.101316054	-0.203654912	-0.30435664	-0.402445276	-0.496966766	-0.586998237	-0.671657013	-0.750109277	-0.821578296	-0.885352125	-0.940790718	-0.987332374	-1.024499449	-1.051903277	-1.069248254	-1.076335032	-1.073062795	-1.059430595
0.097967609	0.194992693	0.290141792	0.382499497	0.471177254	0.555321913	0.634123934	0.706825181	0.77272621	0.831193	0.881663054	0.923650812	0.956752317	0.980649106	0.995111274	0.999999683	0.995267302	0.980959662	0.957214412	0.924260001	0.882413476	0.832077435	0.773736149	0.707950909	0.307504619	0.556645715	0.472581438	0.383970553	0.291665567	0.196554527	0.099552477	0.001592653	-0.096382494	-0.193430364	-0.288617281	-0.381027471	-0.469771875	-0.553996702	-0.632891641	-0.705697661	-0.77171431	-0.830306456	-0.880910396	-0.92303928	-0.956287795	-0.980336063	-0.994952721	-0.999997146	-0.995420806	-0.981267729
0.033653207	0.124827034	0.247399901	0.367534535	0.454786465	0.491971338	0.480483175	0.439290754	0.397970558	0.386144555	0.422902577	0.509794225	0.629772399	0.75246474	0.844015905	0.878201303	0.845080951	0.754286231	0.63183513	0.511546099	0.423935048	0.386323228	0.397472261	0.438534897	0.479980858	0.492143403	0.455812122	0.369281912	0.249462253	0.126652732	0.034726007	9.09E-06	-0.032595936	-0.123009784	-0.245336828	-0.36577819	-0.453747191	-0.491786045	-0.480977422	-0.440046577	-0.398476867	-0.385979085	-0.421883742	-0.508051373	-0.627710463	-0.750634869	-0.842935372	-0.878183122	-0.846130426	-0.756099205
0.097967609	0.194992693	0.290141792	0.382499497	0.471177254	0.555321913	0.634123934	0.706825181	0.77272621	0.831193	0.881663054	0.923650812	0.956752317	0.980649106	0.995111274	0.999999683	0.995267302	0.980959662	0.957214412	0.924260001	0.882413476	0.832077435	0.773736149	0.707950909	0.635354619	0.556645715	0.472581438	0.383970553	0.291665567	0.196554527	0.099552477	0.001592653	-0.096382494	-0.193430364	-0.288617281	-0.381027471	-0.469771875	-0.553996702	-0.632891641	-0.705697661	-0.77171431	-0.830306456	-0.880910396	-0.92303928	-0.956287795	-0.980336063	-0.994952721	-0.999997146	-0.995420806	-0.981267729
0.097967609	0.194992693	0.290141792	0.382499497	0.471177254	0.555321913	0.634123934	0.706825181	0.77272621	0.831193	0.881663054	0.923650812	0.956752317	0.980649106	0.995111274	0.999999683	0.995267302	0.980959662	0.957214412	0.924260001	0.882413476	0.832077435	0.773736149	0.707950909	1.106817119	0.556645715	0.472581438	0.383970553	0.291665567	0.196554527	0.099552477	0.001592653	-0.096382494	-0.193430364	-0.288617281	-0.381027471	-0.469771875	-0.553996702	-0.632891641	-0.705697661	-0.77171431	-0.830306456	-0.880910396	-0.92303928	-0.956287795	-0.980336063	-0.994952721	-0.999997146	-0.995420806	-0.981267729
0.097967609	0.194992693	0.290141792	0.382499497	0.471177254	0.555321913	0.634123934	0.706825181	0.77272621	0.831193	0.881663054	0.923650812	0.956752317	0.980649106	0.995111274	0.999999683	0.995267302	0.980959662	0.957214412	0.924260001	0.882413476	0.832077435	0.773736149	0.707950909	0.635354619	0.556645715	0.472581438	0.383970553	0.291665567	0.196554527	0.099552477	0.001592653	-0.096382494	-0.193430364	-0.288617281	-0.381027471	-0.469771875	-0.553996702	-0.632891641	-0.705697661	-0.77171431	-0.830306456	-0.880910396	-0.92303928	-0.956287795	-0.980336063	-0.994952721	-0.999997146	-0.995420806	-0.981267729
0.049892654	0.182556186	0.352684783	0.501961373	0.578734217	0.555462753	0.438056146	0.263957476	0.089615849	0.02843816	0.052544481	0.023485529	0.172359238	0.342557876	0.475737719	0.526415765	0.477309657	0.345165507	0.175110905	0.025434935	0.052078874	0.029642668	0.087114	0.260965885	0.435546637	0.554245496	0.579186256	0.503900928	0.355433595	0.185168871	0.051475802	1.35E-05	-0.048331962	-0.17995367	-0.349930325	-0.500002163	-0.578255053	-0.556654486	-0.440550282	-0.266949001	-0.092132961	-0.027208179	-0.052982939	-0.021555871	-0.169613346	-0.339940198	-0.474143398	-0.526388695	-0.478859067	-0.347762847
0.097967609	0.194992693	0.290141792	0.382499497	0.471177254	0.555321913	0.634123934	0.706825181	0.77272621	0.831193	0.881663054	0.923650812	0.956752317	0.980649106	0.995111274	0.999999683	0.995267302	0.980959662	0.957214412	0.924260001	0.882413476	0.832077435	0.773736149	0.707950909	0.635354619	0.556645715	0.472581438	0.383970553	0.291665567	0.196554527	0.099552477	0.001592653	-0.096382494	-0.193430364	-0.288617281	-0.381027471	-0.469771875	-0.553996702	-0.632891641	-0.705697661	-0.77171431	-0.830306456	-0.880910396	-0.92303928	-0.956287795	-0.980336063	-0.994952721	-0.999997146	-0.995420806	-0.981267729
0.224307095	0.424844487	0.582573945	0.68687981	0.737412067	0.743687773	0.722560808	0.694150363	0.677166918	0.684709741	0.721498341	0.783164072	0.85774218	0.928981208	0.980649659	1.000775547	0.984765879	0.936622007	0.867932344	0.794874751	0.733962098	0.697590437	0.690515601	0.708170385	0.737290257	0.758749351	0.75196038	0.699799265	0.592875856	0.432121272	0.229062705	0.003708014	-0.21947114	-0.416525983	-0.568841322	-0.666685986	-0.710734484	-0.711278871	-0.685388051	-0.65273231	-0.631068765	-0.632421626	-0.660790901	-0.711840879	-0.774550396	-0.834360367	-0.877029284	-0.892271415	-0.876327948	-0.832884273
0.097967609	0.194992693	0.290141792	0.382499497	0.471177254	0.555321913	0.634123934	0.706825181	0.77272621	0.831193	0.881663054	0.923650812	0.956752317	0.980649106	0.995111274	0.999999683	0.995267302	0.980959662	0.957214412	0.924260001	0.882413476	0.832077435	0.773736149	0.707950909	0.635354619	0.556645715	0.472581438	0.383970553	0.291665567	0.196554527	0.099552477	0.001592653	-0.096382494	-0.193430364	-0.288617281	-0.381027471	-0.469771875	-0.553996702	-0.632891641	-0.705697661	-0.77171431	-0.830306456	-0.880910396	-0.92303928	-0.956287795	-0.980336063	-0.994952721	-0.999997146	-0.995420806	-0.981267729
0.097967609	0.194992693	0.290141792	0.382499497	0.471177254	0.555321913	0.634123934	0.706825181	0.77272621	0.831193	0.881663054	0.923650812	0.956752317	0.980649106	0.995111274	0.999999683	0.995267302	0.980959662	0.957214412	0.924260001	0.882413476	0.832077435	0.773736149	0.707950909	0.340654619	0.556645715	0.472581438	0.383970553	0.291665567	0.196554527	0.099552477	0.001592653	-0.096382494	-0.193430364	-0.288617281	-0.381027471	-0.469771875	-0.553996702	-0.632891641	-0.705697661	-0.77171431	-0.830306456	-0.880910396	-0.92303928	-0.956287795	-0.980336063	-0.994952721	-0.999997146	-0.995420806	-0.981267729
0.097967609	0.194992693	0.290141792	0.382499497	0.471177254	0.555321913	0.634123934	0.706825181	0.77272621	0.831193	0.881663054	0.923650812	0.956752317	0.980649106	0.995111274	0.999999683	0.995267302	0.980959662	0.957214412	0.924260001	0.882413476	0.832077435	0.773736149	0.707950909	0.635354619	0.556645715	0.472581438	0.383970553	0.291665567	0.196554527	0.099552477	0.001592653	-0.096382494	-0.193430364	-0.288617281	-0.381027471	-0.469771875	-0.553996702	-0.632891641	-0.705697661	-0.77171431	-0.830306456	-0.880910396	-0.92303928	-0.956287795	-0.980336063	-0.994952721	-0.999997146	-0.995420806	-0.981267729
0.023295374	0.087558056	0.17772604	0.274118074	0.358650858	0.420376366	0.458495888	0.481861704	0.505163637	0.54311656	0.604639326	0.689018505	0.785380689	0.875680526	0.940224197	0.96388962	0.940964676	0.876984004	0.786949205	0.690528543	0.605842892	0.543914692	0.505627966	0.482197267	0.458958214	0.42117128	0.3598513	0.275626459	0.179295346	0.088864988	0.024041353	6.27E-06	-0.022560405	-0.086258053	-0.176158336	-0.2726064	-0.357444174	-0.419575011	-0.458029542	-0.481526123	-0.504703301	-0.542324858	-0.603442014	-0.687511789	-0.783810614	-0.874370158	-0.939472732	-0.963877088	-0.941694124	-0.878280511
0.097967609	0.194992693	0.290141792	0.382499497	0.471177254	0.555321913	0.634123934	0.706825181	0.77272621	0.831193	0.881663054	0.923650812	0.956752317	0.980649106	0.995111274	0.999999683	0.995267302	0.980959662	0.957214412	0.924260001	0.882413476	0.832077435	0.773736149	0.707950909	0.635354619	0.556645715	0.472581438	0.383970553	0.291665567	0.196554527	0.099552477	0.001592653	-0.096382494	-0.193430364	-0.288617281	-0.381027471	-0.469771875	-0.553996702	-0.632891641	-0.705697661	-0.77171431	-0.830306456	-0.880910396	-0.92303928	-0.956287795	-0.980336063	-0.994952721	-0.999997146	-0.995420806	-0.981267729
0.098159859	0.195757843	0.291849015	0.385499035	0.475793265	0.561845728	0.642807838	0.717876804	0.786303634	0.847400656	0.900548471	0.945202284	0.980897527	1.007254736	1.023983611	1.030886225	1.02785935	1.014895859	0.992085195	0.9596129	0.917759193	0.866896618	0.807486771	0.740076137	0.665291084	0.583832037	0.496466908	0.404023834	0.307383284	0.207469631	0.105242247	0.001686226	-0.102197192	-0.205400379	-0.306919194	-0.405762842	-0.500963651	-0.591586649	-0.676738846	-0.755578148	-0.82732178	-0.89125416	-0.94673413	-0.993201475	-1.030182659	-1.057295715	-1.074254254	-1.080870522	-1.077057502	-1.062830016
0.097967609	0.194992693	0.290141792	0.382499497	0.471177254	0.555321913	0.634123934	0.706825181	0.77272621	0.831193	0.881663054	0.923650812	0.956752317	0.980649106	0.995111274	0.999999683	0.995267302	0.980959662	0.957214412	0.924260001	0.882413476	0.832077435	0.773736149	0.707950909	0.635354619	0.556645715	0.472581438	0.383970553	0.291665567	0.196554527	0.099552477	0.001592653	-0.096382494	-0.193430364	-0.288617281	-0.381027471	-0.469771875	-0.553996702	-0.632891641	-0.705697661	-0.77171431	-0.830306456	-0.880910396	-0.92303928	-0.956287795	-0.980336063	-0.994952721	-0.999997146	-0.995420806	-0.981267729
0.097967609	0.194992693	0.290141792	0.382499497	0.471177254	0.555321913	0.634123934	0.706825181	0.77272621	0.831193	0.881663054	0.923650812	0.956752317	0.980649106	0.995111274	0.999999683	0.995267302	0.980959662	0.957214412	0.924260001	0.882413476	0.832077435	0.773736149	0.707950909	0.635354619	0.556645715	0.472581438	0.383970553	0.291665567	0.196554527	0.099552477	0.001592653	-0.096382494	-0.193430364	-0.288617281	-0.381027471	-0.469771875	-0.553996702	-0.632891641	-0.705697661	-0.77171431	-0.830306456	-0.880910396	-0.92303928	-0.956287795	-0.980336063	-0.994952721	-0.999997146	-0.995420806	-0.981267729
0.097967609	0.194992693	0.290141792	0.382499497	0.471177254	0.555321913	0.634123934	0.706825181	0.77272621	0.831193	0.881663054	0.923650812	0.956752317	0.980649106	0.995111274	0.999999683	0.995267302	0.980959662	0.957214412	0.924260001	0.882413476	0.832077435	0.773736149	0.707950909	0.635354619	0.556645715	0.472581438	0.383970553	0.291665567	0.196554527	0.099552477	0.001592653	-0.096382494	-0.193430364	-0.288617281	-0.381027471	-0.469771875	-0.553996702	-0.632891641	-0.705697661	-0.77171431	-0.830306456	-0.880910396	-0.92303928	-0.956287795	-0.980336063	-0.994952721	-0.999997146	-0.995420806	-0.981267729
0.036949421	0.136639653	0.269304544	0.396446973	0.483564884	0.511450087	0.482267435	0.418382261	0.35434796	0.324770188	0.352153383	0.438841273	0.565783703	0.698562093	0.798659504	0.836192647	0.799827704	0.70054667	0.567997886	0.440657796	0.353111163	0.324723801	0.353509816	0.417243517	0.481424595	0.511395959	0.484514611	0.398258032	0.271517932	0.138628654	0.038126087	9.99E-06	-0.035789711	-0.134659539	-0.267089609	-0.394625017	-0.482599061	-0.511488718	-0.483100851	-0.419520963	-0.355195461	-0.324832044	-0.351211719	-0.437035708	-0.563571152	-0.696568708	-0.797474396	-0.836172667	-0.800978901	-0.70252228
0.070089922	0.254410807	0.484109102	0.671521232	0.74196127	0.665493724	0.493344642	0.430255139	0.621356403	0.85116128	0.980725634	0.988052013	0.923169965	0.866279717	0.855716728	0.861190388	0.855805472	0.865747427	0.921980103	0.98736723	0.981766328	0.854244273	0.625375705	0.431647178	0.490626939	0.663168623	0.741888015	0.673755817	0.487725837	0.258004736	0.072307919	1.91E-05	-0.067903008	-0.250829268	-0.480480939	-0.669254843	-0.741994165	-0.667790276	-0.496087888	-0.42894537	-0.617342646	-0.848049566	-0.979651145	-0.988716961	-0.924362957	-0.866826181	-0.855631991	-0.86118602	-0.855897995	-0.865229285
0.098094105	0.195498473	0.291275606	0.384501082	0.474272438	0.559717863	0.640004634	0.714347191	0.782014801	0.842338711	0.894718734	0.938629203	0.973624226	0.999342204	1.015509544	1.021943559	1.01855449	1.005346664	0.982418734	0.949963038	0.908264044	0.857695911	0.798719188	0.731876661	0.657788412	0.577146106	0.490706583	0.399284792	0.303746149	0.204998378	0.103982923	0.001665997	-0.100970631	-0.20293904	-0.303254647	-0.400945707	-0.495062713	-0.584687631	-0.668942852	-0.746999794	-0.818087065	-0.881498098	-0.936598192	-0.982830888	-1.019723604	-1.046892492	-1.064046446	-1.070990228	-1.067626685	-1.053958016
0.192097797	0.366371817	0.508502804	0.610410151	0.671617563	0.698958834	0.704705212	0.703551669	0.709157269	0.731035079	0.772504331	0.830168525	0.895023312	0.954910345	0.997709642	1.014482091	1.001782169	0.962560109	0.905417512	0.842388352	0.785788538	0.744918551	0.723452914	0.718192007	0.719522829	0.71351597	0.685180245	0.622105426	0.517620368	0.372704248	0.196185115	0.003168402	-0.187942513	-0.359143599	-0.496396607	-0.592261595	-0.64702628	-0.668124075	-0.668031303	-0.661175173	-0.660589978	-0.675087252	-0.707557378	-0.754737007	-0.808429089	-0.85783165	-0.892390909	-0.904493623	-0.891369476	-0.855769025
0.052869747	0.19164945	0.363606931	0.501099951	0.544744368	0.463975574	0.268340366	0.034613378	0.268137001	0.464782125	0.547041426	0.505259596	0.370370835	0.204146748	0.087093965	0.069245028	0.086097203	0.201613831	0.367726214	0.503680116	0.547321785	0.467113312	0.272026209	0.034870092	0.264445015	0.461634095	0.544457552	0.502688116	0.366298131	0.194350529	0.054542094	1.44E-05	-0.051220789	-0.188957453	-0.360906462	-0.499486401	-0.54499749	-0.466285888	-0.272218072	-0.03494354	-0.264230328	-0.462419898	-0.546727465	-0.506813854	-0.373006855	-0.206692164	-0.088125127	-0.069244684	-0.085134786	-0.199093793
0.098159859	0.195757843	0.291849015	0.385499035	0.475793265	0.561845728	0.642807838	0.717876804	0.786303634	0.847400656	0.900548471	0.945202284	0.980897527	1.007254736	1.023983611	1.030886225	1.02785935	1.014895859	0.992085195	0.9596129	0.917759193	0.866896618	0.807486771	0.740076137	0.665291084	0.583832037	0.496466908	0.404023834	0.307383284	0.207469631	0.105242247	0.001686226	-0.102197192	-0.205400379	-0.306919194	-0.405762842	-0.500963651	-0.591586649	-0.676738846	-0.755578148	-0.82732178	-0.89125416	-0.94673413	-0.993201475	-1.030182659	-1.057295715	-1.074254254	-1.080870522	-1.077057502	-1.062830016
0.18738772	0.357815262	0.49764882	0.599176145	0.661902887	0.692273519	0.701894193	0.704672574	0.713534548	0.737472726	0.779603256	0.836670996	0.900101614	0.958331219	0.999836923	1.016120066	1.003901786	0.965979719	0.91052177	0.848960179	0.793001366	0.751496199	0.727962005	0.719397494	0.716719574	0.70675303	0.675318869	0.610690936	0.506592507	0.364009363	0.191377278	0.00308951	-0.183332006	-0.350746723	-0.485781266	-0.581328665	-0.637620751	-0.661676121	-0.665304494	-0.662171996	-0.66462734	-0.681015721	-0.714066503	-0.760672103	-0.813045564	-0.860930447	-0.894308417	-0.905954257	-0.893241155	-0.858783911
0.097967609	0.194992693	0.290141792	0.382499497	0.471177254	0.555321913	0.634123934	0.706825181	0.77272621	0.831193	0.881663054	0.923650812	0.956752317	0.980649106	0.995111274	0.999999683	0.995267302	0.980959662	0.957214412	0.924260001	0.882413476	0.832077435	0.773736149	0.707950909	0.321867119	0.556645715	0.472581438	0.383970553	0.291665567	0.196554527	0.099552477	0.001592653	-0.096382494	-0.193430364	-0.288617281	-0.381027471	-0.469771875	-0.553996702	-0.632891641	-0.705697661	-0.77171431	-0.830306456	-0.880910396	-0.92303928	-0.956287795	-0.980336063	-0.994952721	-0.999997146	-0.995420806	-0.981267729
0.098159859	0.195757843	0.291849015	0.385499035	0.475793265	0.561845728	0.642807838	0.717876804	0.786303634	0.847400656	0.900548471	0.945202284	0.980897527	1.007254736	1.023983611	1.030886225	1.02785935	1.014895859	0.992085195	0.9596129	0.917759193	0.866896618	0.807486771	0.740076137	0.665291084	0.583832037	0.496466908	0.404023834	0.307383284	0.207469631	0.105242247	0.001686226	-0.102197192	-0.205400379	-0.306919194	-0.405762842	-0.500963651	-0.591586649	-0.676738846	-0.755578148	-0.82732178	-0.89125416	-0.94673413	-0.993201475	-1.030182659	-1.057295715	-1.074254254	-1.080870522	-1.077057502	-1.062830016
0.032979878	0.122410716	0.242906723	0.36157173	0.44878151	0.487762393	0.479756023	0.443049677	0.406219845	0.397887142	0.436456261	0.523319726	0.641836943	0.762453503	0.852255525	0.885757063	0.85329949	0.764241558	0.643868331	0.525057539	0.43750258	0.398109845	0.405788639	0.442369559	0.479320932	0.487978717	0.449821265	0.363305238	0.244937814	0.124202932	0.034031451	8.91E-06	-0.031943541	-0.120626856	-0.240875074	-0.359829641	-0.447728635	-0.487533298	-0.480183317	-0.443729761	-0.406658793	-0.397677186	-0.435423079	-0.52159055	-0.639806185	-0.760657159	-0.851196365	-0.88573925	-0.854328179	-0.766021189
0.097967609	0.194992693	0.290141792	0.382499497	0.471177254	0.555321913	0.634123934	0.706825181	0.77272621	0.831193	0.881663054	0.923650812	0.956752317	0.980649106	0.995111274	0.999999683	0.995267302	0.980959662	0.957214412	0.924260001	0.882413476	0.832077435	0.773736149	0.707950909	0.320179619	0.556645715	0.472581438	0.383970553	0.291665567	0.196554527	0.099552477	0.001592653	-0.096382494	-0.193430364	-0.288617281	-0.381027471	-0.469771875	-0.553996702	-0.632891641	-0.705697661	-0.77171431	-0.830306456	-0.880910396	-0.92303928	-0.956287795	-0.980336063	-0.994952721	-0.999997146	-0.995420806	-0.981267729
0.097967609	0.194992693	0.290141792	0.382499497	0.471177254	0.555321913	0.634123934	0.706825181	0.77272621	0.831193	0.881663054	0.923650812	0.956752317	0.980649106	0.995111274	0.999999683	0.995267302	0.980959662	0.957214412	0.924260001	0.882413476	0.832077435	0.773736149	0.707950909	0.635354619	0.556645715	0.472581438	0.383970553	0.291665567	0.196554527	0.099552477	0.001592653	-0.096382494	-0.193430364	-0.288617281	-0.381027471	-0.469771875	-0.553996702	-0.632891641	-0.705697661	-0.77171431	-0.830306456	-0.880910396	-0.92303928	-0.956287795	-0.980336063	-0.994952721	-0.999997146	-0.995420806	-0.981267729
0.097967609	0.194992693	0.290141792	0.382499497	0.471177254	0.555321913	0.634123934	0.706825181	0.77272621	0.831193	0.881663054	0.923650812	0.956752317	0.980649106	0.995111274	0.999999683	0.995267302	0.980959662	0.957214412	0.924260001	0.882413476	0.832077435	0.773736149	0.707950909	0.635354619	0.556645715	0.472581438	0.383970553	0.291665567	0.196554527	0.099552477	0.001592653	-0.096382494	-0.193430364	-0.288617281	-0.381027471	-0.469771875	-0.553996702	-0.632891641	-0.705697661	-0.77171431	-0.830306456	-0.880910396	-0.92303928	-0.956287795	-0.980336063	-0.994952721	-0.999997146	-0.995420806	-0.981267729
0.097967609	0.194992693	0.290141792	0.382499497	0.471177254	0.555321913	0.634123934	0.706825181	0.77272621	0.831193	0.881663054	0.923650812	0.956752317	0.980649106	0.995111274	0.999999683	0.995267302	0.980959662	0.957214412	0.924260001	0.882413476	0.832077435	0.773736149	0.707950909	0.635354619	0.556645715	0.472581438	0.383970553	0.291665567	0.196554527	0.099552477	0.001592653	-0.096382494	-0.193430364	-0.288617281	-0.381027471	-0.469771875	-0.553996702	-0.632891641	-0.705697661	-0.77171431	-0.830306456	-0.880910396	-0.92303928	-0.956287795	-0.980336063	-0.994952721	-0.999997146	-0.995420806	-0.981267729
0.097967609	0.194992693	0.290141792	0.382499497	0.471177254	0.555321913	0.634123934	0.706825181	0.77272621	0.831193	0.881663054	0.923650812	0.956752317	0.980649106	0.995111274	0.999999683	0.995267302	0.980959662	0.957214412	0.924260001	0.882413476	0.832077435	0.773736149	0.707950909	0.635354619	0.556645715	0.472581438	0.383970553	0.291665567	0.196554527	0.099552477	0.001592653	-0.096382494	-0.193430364	-0.288617281	-0.381027471	-0.469771875	-0.553996702	-0.632891641	-0.705697661	-0.77171431	-0.830306456	-0.880910396	-0.92303928	-0.956287795	-0.980336063	-0.994952721	-0.999997146	-0.995420806	-0.981267729
0.068265308	0.247764243	0.471362515	0.65354031	0.721284992	0.644783158	0.472182076	0.403969677	0.590444739	0.814773175	0.939589382	0.943552094	0.875779051	0.816050399	0.803649811	0.808577542	0.803720234	0.815477588	0.874541309	0.942819762	0.940565596	0.817768446	0.594381205	0.405278155	0.469417891	0.642468652	0.721192799	0.65570781	0.474881696	0.251263703	0.070425498	1.86E-05	-0.066135385	-0.244276827	-0.467832143	-0.651341707	-0.721337592	-0.647069125	-0.47496997	-0.402744403	-0.58651339	-0.811749426	-0.938579776	-0.944264704	-0.877019888	-0.816637679	-0.803583744	-0.808573441	-0.803794785	-0.814919225
0.070696655	0.256620826	0.488346832	0.677497384	0.748828238	0.672357117	0.500302761	0.438792948	0.631473436	0.863126622	0.994259594	1.002662339	0.938663999	0.882628783	0.872631435	0.878279617	0.872725959	0.882108778	0.937488563	1.001992389	0.995321309	0.866238874	0.635521121	0.440212149	0.497598789	0.670028077	0.748761142	0.679754221	0.491995986	0.260246163	0.072933872	1.92E-05	-0.068490789	-0.253007995	-0.484686171	-0.675208508	-0.748854716	-0.674657596	-0.503032847	-0.437455794	-0.627431424	-0.859985558	-0.99316394	-1.003312405	-0.939842572	-0.883162877	-0.872540811	-0.878275163	-0.872824158	-0.881602835
0.097967609	0.194992693	0.290141792	0.382499497	0.471177254	0.555321913	0.634123934	0.706825181	0.77272621	0.831193	0.881663054	0.923650812	0.956752317	0.980649106	0.995111274	0.999999683	0.995267302	0.980959662	0.957214412	0.924260001	0.882413476	0.832077435	0.773736149	0.707950909	0.281479619	0.556645715	0.472581438	0.383970553	0.291665567	0.196554527	0.099552477	0.001592653	-0.096382494	-0.193430364	-0.288617281	-0.381027471	-0.469771875	-0.553996702	-0.632891641	-0.705697661	-0.77171431	-0.830306456	-0.880910396	-0.92303928	-0.956287795	-0.980336063	-0.994952721	-0.999997146	-0.995420806	-0.981267729
0.057701927	0.209269844	0.397475757	0.549116343	0.600649932	0.522214668	0.339489682	0.218194586	0.388817877	0.58679269	0.682969312	0.661221931	0.563573534	0.469601768	0.436403226	0.436729754	0.436299248	0.4685347	0.561784388	0.660061832	0.683514332	0.589301821	0.392446819	0.218917729	0.336194538	0.519911734	0.600432629	0.550889492	0.400427975	0.212221809	0.059527414	1.57E-05	-0.055901989	-0.206327899	-0.394513686	-0.547316063	-0.600831833	-0.524488019	-0.342790533	-0.217582341	-0.385187974	-0.584254954	-0.682391971	-0.662361093	-0.565363946	-0.470687451	-0.436516058	-0.43672754	-0.436203835	-0.467486318
0.072656234	0.263758146	0.502030846	0.696789209	0.770979765	0.694449902	0.522532259	0.465768073	0.663657629	0.901356461	1.037523183	1.049276255	0.987905565	0.93437925	0.926081108	0.932272859	0.926193419	0.933895577	0.986772418	1.048651323	1.038651518	0.904563441	0.667799323	0.467273145	0.51986751	0.692106841	0.770932125	0.699117745	0.505784639	0.267484906	0.074955531	1.98E-05	-0.070389163	-0.260044264	-0.498265287	-0.694427876	-0.77098595	-0.696764336	-0.525224867	-0.464344561	-0.65952199	-0.89812035	-1.036360425	-1.049881122	-0.989041862	-0.934876778	-0.925972383	-0.93226813	-0.926309092	-0.933425729
0.098159859	0.195757843	0.291849015	0.385499035	0.475793265	0.561845728	0.642807838	0.717876804	0.786303634	0.847400656	0.900548471	0.945202284	0.980897527	1.007254736	1.023983611	1.030886225	1.02785935	1.014895859	0.992085195	0.9596129	0.917759193	0.866896618	0.807486771	0.740076137	0.665291084	0.583832037	0.496466908	0.404023834	0.307383284	0.207469631	0.105242247	0.001686226	-0.102197192	-0.205400379	-0.306919194	-0.405762842	-0.500963651	-0.591586649	-0.676738846	-0.755578148	-0.82732178	-0.89125416	-0.94673413	-0.993201475	-1.030182659	-1.057295715	-1.074254254	-1.080870522	-1.077057502	-1.062830016
0.241804943	0.438518308	0.56161018	0.60884371	0.603296304	0.582386977	0.581843421	0.621539445	0.699071448	0.793349959	0.876004282	0.925047374	0.934496	0.915762782	0.890601276	0.879339953	0.890264471	0.915342055	0.934366259	0.925507537	0.877109529	0.794859304	0.700542479	0.622532329	0.582142331	0.582134474	0.602971697	0.609085022	0.562950382	0.441147834	0.245464925	0.004056484	-0.238132696	-0.435868775	-0.560249408	-0.608588161	-0.603616907	-0.582645219	-0.581555633	-0.620556964	-0.697604994	-0.791837398	-0.874889803	-0.924576373	-0.934618076	-0.916181851	-0.890942027	-0.879346183	-0.889931683	-0.914919773
0.098117703	0.195592825	0.291487114	0.38487447	0.474849831	0.560537909	0.641101653	0.71575039	0.783747549	0.844417897	0.897154217	0.941423359	0.97677161	1.002829323	1.019314756	1.026037097	1.022898618	1.009895956	0.987120494	0.954757831	0.913086358	0.862474931	0.803379669	0.73633991	0.661973342	0.580970368	0.494087753	0.402141599	0.305999731	0.206573543	0.104809404	0.00167968	-0.101826528	-0.204712843	-0.305985187	-0.40466137	-0.499780613	-0.590412895	-0.675668054	-0.754704534	-0.826737708	-0.891047684	-0.946986517	-0.993984761	-1.031557288	-1.059308315	-1.07693559	-1.084233689	-1.081096388	-1.067518083
0.097967609	0.194992693	0.290141792	0.382499497	0.471177254	0.555321913	0.634123934	0.706825181	0.77272621	0.831193	0.881663054	0.923650812	0.956752317	0.980649106	0.995111274	0.999999683	0.995267302	0.980959662	0.957214412	0.924260001	0.882413476	0.832077435	0.773736149	0.707950909	0.635354619	0.556645715	0.472581438	0.383970553	0.291665567	0.196554527	0.099552477	0.001592653	-0.096382494	-0.193430364	-0.288617281	-0.381027471	-0.469771875	-0.553996702	-0.632891641	-0.705697661	-0.77171431	-0.830306456	-0.880910396	-0.92303928	-0.956287795	-0.980336063	-0.994952721	-0.999997146	-0.995420806	-0.981267729
0.067673486	0.245608262	0.467227249	0.647705103	0.714569981	0.638041679	0.46523556	0.395225614	0.580247597	0.802830192	0.926095828	0.928922615	0.860127584	0.799379932	0.786332542	0.791075465	0.786396676	0.79879265	0.858872672	0.92817381	0.927050686	0.805797116	0.584158135	0.396506316	0.462454452	0.635730181	0.714471506	0.649850789	0.470714769	0.249077075	0.069814926	1.84E-05	-0.065562049	-0.242151381	-0.463728616	-0.645528541	-0.71462911	-0.640324633	-0.468039742	-0.394028516	-0.576342022	-0.799834859	-0.925107701	-0.929651723	-0.861385573	-0.799981793	-0.78627289	-0.791071452	-0.786465064	-0.798219929
0.097967609	0.194992693	0.290141792	0.382499497	0.471177254	0.555321913	0.634123934	0.706825181	0.77272621	0.831193	0.881663054	0.923650812	0.956752317	0.980649106	0.995111274	0.999999683	0.995267302	0.980959662	0.957214412	0.924260001	0.882413476	0.832077435	0.773736149	0.707950909	0.635354619	0.556645715	0.472581438	0.383970553	0.291665567	0.196554527	0.099552477	0.001592653	-0.096382494	-0.193430364	-0.288617281	-0.381027471	-0.469771875	-0.553996702	-0.632891641	-0.705697661	-0.77171431	-0.830306456	-0.880910396	-0.92303928	-0.956287795	-0.980336063	-0.994952721	-0.999997146	-0.995420806	-0.981267729
0.097967609	0.194992693	0.290141792	0.382499497	0.471177254	0.555321913	0.634123934	0.706825181	0.77272621	0.831193	0.881663054	0.923650812	0.956752317	0.980649106	0.995111274	0.999999683	0.995267302	0.980959662	0.957214412	0.924260001	0.882413476	0.832077435	0.773736149	0.707950909	0.635354619	0.556645715	0.472581438	0.383970553	0.291665567	0.196554527	0.099552477	0.001592653	-0.096382494	-0.193430364	-0.288617281	-0.381027471	-0.469771875	-0.553996702	-0.632891641	-0.705697661	-0.77171431	-0.830306456	-0.880910396	-0.92303928	-0.956287795	-0.980336063	-0.994952721	-0.999997146	-0.995420806	-0.981267729
0.098159859	0.195757843	0.291849015	0.385499035	0.475793265	0.561845728	0.642807838	0.717876804	0.786303634	0.847400656	0.900548471	0.945202284	0.980897527	1.007254736	1.023983611	1.030886225	1.02785935	1.014895859	0.992085195	0.9596129	0.917759193	0.866896618	0.807486771	0.740076137	0.665291084	0.583832037	0.496466908	0.404023834	0.307383284	0.207469631	0.105242247	0.001686226	-0.102197192	-0.205400379	-0.306919194	-0.405762842	-0.500963651	-0.591586649	-0.676738846	-0.755578148	-0.82732178	-0.89125416	-0.94673413	-0.993201475	-1.030182659	-1.057295715	-1.074254254	-1.080870522	-1.077057502	-1.062830016
0.098159859	0.195757843	0.291849015	0.385499035	0.475793265	0.561845728	0.642807838	0.717876804	0.786303634	0.847400656	0.900548471	0.945202284	0.980897527	1.007254736	1.023983611	1.030886225	1.02785935	1.014895859	0.992085195	0.9596129	0.917759193	0.866896618	0.807486771	0.740076137	0.665291084	0.583832037	0.496466908	0.404023834	0.307383284	0.207469631	0.105242247	0.001686226	-0.102197192	-0.205400379	-0.306919194	-0.405762842	-0.500963651	-0.591586649	-0.676738846	-0.755578148	-0.82732178	-0.89125416	-0.94673413	-0.993201475	-1.030182659	-1.057295715	-1.074254254	-1.080870522	-1.077057502	-1.062830016
0.068136693	0.24729571	0.470463873	0.652272329	0.71982605	0.643319126	0.470676051	0.402079149	0.58823621	0.812183847	0.936663535	0.940381377	0.872390015	0.812444381	0.799905551	0.80479347	0.799974623	0.811868486	0.871148615	0.939645511	0.937635127	0.815172953	0.592166997	0.403381621	0.467908271	0.641005292	0.719732498	0.65443509	0.473976174	0.25078851	0.070292808	1.85E-05	-0.066010787	-0.243814929	-0.466940398	-0.650078513	-0.719880062	-0.645604421	-0.473467405	-0.400859964	-0.584310505	-0.809166279	-0.935658578	-0.941097526	-0.873634505	-0.813034768	-0.799840862	-0.804789389	-0.80004785	-0.811307063
0.097967609	0.194992693	0.290141792	0.382499497	0.471177254	0.555321913	0.634123934	0.706825181	0.77272621	0.831193	0.881663054	0.923650812	0.956752317	0.980649106	0.995111274	0.999999683	0.995267302	0.980959662	0.957214412	0.924260001	0.882413476	0.832077435	0.773736149	0.707950909	0.635354619	0.556645715	0.472581438	0.383970553	0.291665567	0.196554527	0.099552477	0.001592653	-0.096382494	-0.193430364	-0.288617281	-0.381027471	-0.469771875	-0.553996702	-0.632891641	-0.705697661	-0.77171431	-0.830306456	-0.880910396	-0.92303928	-0.956287795	-0.980336063	-0.994952721	-0.999997146	-0.995420806	-0.981267729
0.098070074	0.195402385	0.291060203	0.384120819	0.473684412	0.558882717	0.638887413	0.712918152	0.780250146	0.840221239	0.892238404	0.935783595	0.970418886	0.995790872	1.011634262	1.017774641	1.014130369	1.000713599	0.977630394	0.945079951	0.903352929	0.85282889	0.793972887	0.727331225	0.653526419	0.573251423	0.487263152	0.396375379	0.301451069	0.203394208	0.103141223	0.001652063	-0.100098972	-0.201132573	-0.300473827	-0.397161622	-0.490257937	-0.57885694	-0.66209381	-0.739153177	-0.809277127	-0.871772663	-0.926018574	-0.971471623	-1.007672011	-1.034248041	-1.050919957	-1.057502897	-1.053908946	-1.040148249
0.021624893	0.081530462	0.166393829	0.258761616	0.342499996	0.407652751	0.453093539	0.486106162	0.519064845	0.56436566	0.629350449	0.712967144	0.805324343	0.890320835	0.950491562	0.972460331	0.951179649	0.891540141	0.80681108	0.714433795	0.630574401	0.565253752	0.519672491	0.486605084	0.453699495	0.408538152	0.343721395	0.260227051	0.167881529	0.082753093	0.022318113	5.81E-06	-0.02094195	-0.080314499	-0.164908075	-0.257293764	-0.341273497	-0.406761964	-0.452484192	-0.485607226	-0.518460567	-0.563482946	-0.628131609	-0.711502939	-0.803835699	-0.889094896	-0.94979322	-0.972448709	-0.951857439	-0.892752742
0.097967609	0.194992693	0.290141792	0.382499497	0.471177254	0.555321913	0.634123934	0.706825181	0.77272621	0.831193	0.881663054	0.923650812	0.956752317	0.980649106	0.995111274	0.999999683	0.995267302	0.980959662	0.957214412	0.924260001	0.882413476	0.832077435	0.773736149	0.707950909	1.116192119	0.556645715	0.472581438	0.383970553	0.291665567	0.196554527	0.099552477	0.001592653	-0.096382494	-0.193430364	-0.288617281	-0.381027471	-0.469771875	-0.553996702	-0.632891641	-0.705697661	-0.77171431	-0.830306456	-0.880910396	-0.92303928	-0.956287795	-0.980336063	-0.994952721	-0.999997146	-0.995420806	-0.981267729
0.097967609	0.194992693	0.290141792	0.382499497	0.471177254	0.555321913	0.634123934	0.706825181	0.77272621	0.831193	0.881663054	0.923650812	0.956752317	0.980649106	0.995111274	0.999999683	0.995267302	0.980959662	0.957214412	0.924260001	0.882413476	0.832077435	0.773736149	0.707950909	0.635354619	0.556645715	0.472581438	0.383970553	0.291665567	0.196554527	0.099552477	0.001592653	-0.096382494	-0.193430364	-0.288617281	-0.381027471	-0.469771875	-0.553996702	-0.632891641	-0.705697661	-0.77171431	-0.830306456	-0.880910396	-0.92303928	-0.956287795	-0.980336063	-0.994952721	-0.999997146	-0.995420806	-0.981267729
0.097967609	0.194992693	0.290141792	0.382499497	0.471177254	0.555321913	0.634123934	0.706825181	0.77272621	0.831193	0.881663054	0.923650812	0.956752317	0.980649106	0.995111274	0.999999683	0.995267302	0.980959662	0.957214412	0.924260001	0.882413476	0.832077435	0.773736149	0.707950909	0.635354619	0.556645715	0.472581438	0.383970553	0.291665567	0.196554527	0.099552477	0.001592653	-0.096382494	-0.193430364	-0.288617281	-0.381027471	-0.469771875	-0.553996702	-0.632891641	-0.705697661	-0.77171431	-0.830306456	-0.880910396	-0.92303928	-0.956287795	-0.980336063	-0.994952721	-0.999997146	-0.995420806	-0.981267729
0.097967609	0.194992693	0.290141792	0.382499497	0.471177254	0.555321913	0.634123934	0.706825181	0.77272621	0.831193	0.881663054	0.923650812	0.956752317	0.980649106	0.995111274	0.999999683	0.995267302	0.980959662	0.957214412	0.924260001	0.882413476	0.832077435	0.773736149	0.707950909	0.635354619	0.556645715	0.472581438	0.383970553	0.291665567	0.196554527	0.099552477	0.001592653	-0.096382494	-0.193430364	-0.288617281	-0.381027471	-0.469771875	-0.553996702	-0.632891641	-0.705697661	-0.77171431	-0.830306456	-0.880910396	-0.92303928	-0.956287795	-0.980336063	-0.994952721	-0.999997146	-0.995420806	-0.981267729
0.097967609	0.194992693	0.290141792	0.382499497	0.471177254	0.555321913	0.634123934	0.706825181	0.77272621	0.831193	0.881663054	0.923650812	0.956752317	0.980649106	0.995111274	0.999999683	0.995267302	0.980959662	0.957214412	0.924260001	0.882413476	0.832077435	0.773736149	0.707950909	1.058179619	0.556645715	0.472581438	0.383970553	0.291665567	0.196554527	0.099552477	0.001592653	-0.096382494	-0.193430364	-0.288617281	-0.381027471	-0.469771875	-0.553996702	-0.632891641	-0.705697661	-0.77171431	-0.830306456	-0.880910396	-0.92303928	-0.956287795	-0.980336063	-0.994952721	-0.999997146	-0.995420806	-0.981267729
0.097967609	0.194992693	0.290141792	0.382499497	0.471177254	0.555321913	0.634123934	0.706825181	0.77272621	0.831193	0.881663054	0.923650812	0.956752317	0.980649106	0.995111274	0.999999683	0.995267302	0.980959662	0.957214412	0.924260001	0.882413476	0.832077435	0.773736149	0.707950909	0.635354619	0.556645715	0.472581438	0.383970553	0.291665567	0.196554527	0.099552477	0.001592653	-0.096382494	-0.193430364	-0.288617281	-0.381027471	-0.469771875	-0.553996702	-0.632891641	-0.705697661	-0.77171431	-0.830306456	-0.880910396	-0.92303928	-0.956287795	-0.980336063	-0.994952721	-0.999997146	-0.995420806	-0.981267729
0.097967609	0.194992693	0.290141792	0.382499497	0.471177254	0.555321913	0.634123934	0.706825181	0.77272621	0.831193	0.881663054	0.923650812	0.956752317	0.980649106	0.995111274	0.999999683	0.995267302	0.980959662	0.957214412	0.924260001	0.882413476	0.832077435	0.773736149	0.707950909	0.635354619	0.556645715	0.472581438	0.383970553	0.291665567	0.196554527	0.099552477	0.001592653	-0.096382494	-0.193430364	-0.288617281	-0.381027471	-0.469771875	-0.553996702	-0.632891641	-0.705697661	-0.77171431	-0.830306456	-0.880910396	-0.92303928	-0.956287795	-0.980336063	-0.994952721	-0.999997146	-0.995420806	-0.981267729
0.097967609	0.194992693	0.290141792	0.382499497	0.471177254	0.555321913	0.634123934	0.706825181	0.77272621	0.831193	0.881663054	0.923650812	0.956752317	0.980649106	0.995111274	0.999999683	0.995267302	0.980959662	0.957214412	0.924260001	0.882413476	0.832077435	0.773736149	0.707950909	0.909529619	0.556645715	0.472581438	0.383970553	0.291665567	0.196554527	0.099552477	0.001592653	-0.096382494	-0.193430364	-0.288617281	-0.381027471	-0.469771875	-0.553996702	-0.632891641	-0.705697661	-0.77171431	-0.830306456	-0.880910396	-0.92303928	-0.956287795	-0.980336063	-0.994952721	-0.999997146	-0.995420806	-0.981267729
0.097967609	0.194992693	0.290141792	0.382499497	0.471177254	0.555321913	0.634123934	0.706825181	0.77272621	0.831193	0.881663054	0.923650812	0.956752317	0.980649106	0.995111274	0.999999683	0.995267302	0.980959662	0.957214412	0.924260001	0.882413476	0.832077435	0.773736149	0.707950909	0.635354619	0.556645715	0.472581438	0.383970553	0.291665567	0.196554527	0.099552477	0.001592653	-0.096382494	-0.193430364	-0.288617281	-0.381027471	-0.469771875	-0.553996702	-0.632891641	-0.705697661	-0.77171431	-0.830306456	-0.880910396	-0.92303928	-0.956287795	-0.980336063	-0.994952721	-0.999997146	-0.995420806	-0.981267729
0.205008204	0.376311722	0.492497203	0.5516658	0.570709186	0.577169937	0.597347036	0.645789105	0.720529968	0.805755385	0.880267028	0.927623416	0.943279412	0.935620157	0.920727025	0.913647666	0.920517861	0.935389079	0.943303825	0.928123962	0.88128312	0.807106323	0.721885255	0.646819839	0.597890245	0.577328309	0.570835048	0.552229047	0.493889608	0.378670763	0.208137872	0.00342591	-0.201869371	-0.373937708	-0.491089342	-0.551091736	-0.57058004	-0.577015455	-0.59681166	-0.644765621	-0.719177567	-0.80440151	-0.879243501	-0.927114215	-0.943248676	-0.935849355	-0.920938458	-0.913651626	-0.920311018	-0.935156197
0.097967609	0.194992693	0.290141792	0.382499497	0.471177254	0.555321913	0.634123934	0.706825181	0.77272621	0.831193	0.881663054	0.923650812	0.956752317	0.980649106	0.995111274	0.999999683	0.995267302	0.980959662	0.957214412	0.924260001	0.882413476	0.832077435	0.773736149	0.707950909	0.635354619	0.556645715	0.472581438	0.383970553	0.291665567	0.196554527	0.099552477	0.001592653	-0.096382494	-0.193430364	-0.288617281	-0.381027471	-0.469771875	-0.553996702	-0.632891641	-0.705697661	-0.77171431	-0.830306456	-0.880910396	-0.92303928	-0.956287795	-0.980336063	-0.994952721	-0.999997146	-0.995420806	-0.981267729
0.097967609	0.194992693	0.290141792	0.382499497	0.471177254	0.555321913	0.634123934	0.706825181	0.77272621	0.831193	0.881663054	0.923650812	0.956752317	0.980649106	0.995111274	0.999999683	0.995267302	0.980959662	0.957214412	0.924260001	0.882413476	0.832077435	0.773736149	0.707950909	0.635354619	0.556645715	0.472581438	0.383970553	0.291665567	0.196554527	0.099552477	0.001592653	-0.096382494	-0.193430364	-0.288617281	-0.381027471	-0.469771875	-0.553996702	-0.632891641	-0.705697661	-0.77171431	-0.830306456	-0.880910396	-0.92303928	-0.956287795	-0.980336063	-0.994952721	-0.999997146	-0.995420806	-0.981267729
0.097967609	0.194992693	0.290141792	0.382499497	0.471177254	0.555321913	0.634123934	0.706825181	0.77272621	0.831193	0.881663054	0.923650812	0.956752317	0.980649106	0.995111274	0.999999683	0.995267302	0.980959662	0.957214412	0.924260001	0.882413476	0.832077435	0.773736149	0.707950909	1.062792119	0.556645715	0.472581438	0.383970553	0.291665567	0.196554527	0.099552477	0.001592653	-0.096382494	-0.193430364	-0.288617281	-0.381027471	-0.469771875	-0.553996702	-0.632891641	-0.705697661	-0.77171431	-0.830306456	-0.880910396	-0.92303928	-0.956287795	-0.980336063	-0.994952721	-0.999997146	-0.995420806	-0.981267729
0.097967609	0.194992693	0.290141792	0.382499497	0.471177254	0.555321913	0.634123934	0.706825181	0.77272621	0.831193	0.881663054	0.923650812	0.956752317	0.980649106	0.995111274	0.999999683	0.995267302	0.980959662	0.957214412	0.924260001	0.882413476	0.832077435	0.773736149	0.707950909	0.635354619	0.556645715	0.472581438	0.383970553	0.291665567	0.196554527	0.099552477	0.001592653	-0.096382494	-0.193430364	-0.288617281	-0.381027471	-0.469771875	-0.553996702	-0.632891641	-0.705697661	-0.77171431	-0.830306456	-0.880910396	-0.92303928	-0.956287795	-0.980336063	-0.994952721	-0.999997146	-0.995420806	-0.981267729
0.097967609	0.194992693	0.290141792	0.382499497	0.471177254	0.555321913	0.634123934	0.706825181	0.77272621	0.831193	0.881663054	0.923650812	0.956752317	0.980649106	0.995111274	0.999999683	0.995267302	0.980959662	0.957214412	0.924260001	0.882413476	0.832077435	0.773736149	0.707950909	0.635354619	0.556645715	0.472581438	0.383970553	0.291665567	0.196554527	0.099552477	0.001592653	-0.096382494	-0.193430364	-0.288617281	-0.381027471	-0.469771875	-0.553996702	-0.632891641	-0.705697661	-0.77171431	-0.830306456	-0.880910396	-0.92303928	-0.956287795	-0.980336063	-0.994952721	-0.999997146	-0.995420806	-0.981267729
0.097967609	0.194992693	0.290141792	0.382499497	0.471177254	0.555321913	0.634123934	0.706825181	0.77272621	0.831193	0.881663054	0.923650812	0.956752317	0.980649106	0.995111274	0.999999683	0.995267302	0.980959662	0.957214412	0.924260001	0.882413476	0.832077435	0.773736149	0.707950909	0.635354619	0.556645715	0.472581438	0.383970553	0.291665567	0.196554527	0.099552477	0.001592653	-0.096382494	-0.193430364	-0.288617281	-0.381027471	-0.469771875	-0.553996702	-0.632891641	-0.705697661	-0.77171431	-0.830306456	-0.880910396	-0.92303928	-0.956287795	-0.980336063	-0.994952721	-0.999997146	-0.995420806	-0.981267729
0.097967609	0.194992693	0.290141792	0.382499497	0.471177254	0.555321913	0.634123934	0.706825181	0.77272621	0.831193	0.881663054	0.923650812	0.956752317	0.980649106	0.995111274	0.999999683	0.995267302	0.980959662	0.957214412	0.924260001	0.882413476	0.832077435	0.773736149	0.707950909	0.635354619	0.556645715	0.472581438	0.383970553	0.291665567	0.196554527	0.099552477	0.001592653	-0.096382494	-0.193430364	-0.288617281	-0.381027471	-0.469771875	-0.553996702	-0.632891641	-0.705697661	-0.77171431	-0.830306456	-0.880910396	-0.92303928	-0.956287795	-0.980336063	-0.994952721	-0.999997146	-0.995420806	-0.981267729
0.097967609	0.194992693	0.290141792	0.382499497	0.471177254	0.555321913	0.634123934	0.706825181	0.77272621	0.831193	0.881663054	0.923650812	0.956752317	0.980649106	0.995111274	0.999999683	0.995267302	0.980959662	0.957214412	0.924260001	0.882413476	0.832077435	0.773736149	0.707950909	0.635354619	0.556645715	0.472581438	0.383970553	0.291665567	0.196554527	0.099552477	0.001592653	-0.096382494	-0.193430364	-0.288617281	-0.381027471	-0.469771875	-0.553996702	-0.632891641	-0.705697661	-0.77171431	-0.830306456	-0.880910396	-0.92303928	-0.956287795	-0.980336063	-0.994952721	-0.999997146	-0.995420806	-0.981267729
0.097967609	0.194992693	0.290141792	0.382499497	0.471177254	0.555321913	0.634123934	0.706825181	0.77272621	0.831193	0.881663054	0.923650812	0.956752317	0.980649106	0.995111274	0.999999683	0.995267302	0.980959662	0.957214412	0.924260001	0.882413476	0.832077435	0.773736149	0.707950909	1.063317119	0.556645715	0.472581438	0.383970553	0.291665567	0.196554527	0.099552477	0.001592653	-0.096382494	-0.193430364	-0.288617281	-0.381027471	-0.469771875	-0.553996702	-0.632891641	-0.705697661	-0.77171431	-0.830306456	-0.880910396	-0.92303928	-0.956287795	-0.980336063	-0.994952721	-0.999997146	-0.995420806	-0.981267729
0.097967609	0.194992693	0.290141792	0.382499497	0.471177254	0.555321913	0.634123934	0.706825181	0.77272621	0.831193	0.881663054	0.923650812	0.956752317	0.980649106	0.995111274	0.999999683	0.995267302	0.980959662	0.957214412	0.924260001	0.882413476	0.832077435	0.773736149	0.707950909	0.635354619	0.556645715	0.472581438	0.383970553	0.291665567	0.196554527	0.099552477	0.001592653	-0.096382494	-0.193430364	-0.288617281	-0.381027471	-0.469771875	-0.553996702	-0.632891641	-0.705697661	-0.77171431	-0.830306456	-0.880910396	-0.92303928	-0.956287795	-0.980336063	-0.994952721	-0.999997146	-0.995420806	-0.981267729
0.098159859	0.195757843	0.291849015	0.385499035	0.475793265	0.561845728	0.642807838	0.717876804	0.786303634	0.847400656	0.900548471	0.945202284	0.980897527	1.007254736	1.023983611	1.030886225	1.02785935	1.014895859	0.992085195	0.9596129	0.917759193	0.866896618	0.807486771	0.740076137	0.665291084	0.583832037	0.496466908	0.404023834	0.307383284	0.207469631	0.105242247	0.001686226	-0.102197192	-0.205400379	-0.306919194	-0.405762842	-0.500963651	-0.591586649	-0.676738846	-0.755578148	-0.82732178	-0.89125416	-0.94673413	-0.993201475	-1.030182659	-1.057295715	-1.074254254	-1.080870522	-1.077057502	-1.062830016
0.097967609	0.194992693	0.290141792	0.382499497	0.471177254	0.555321913	0.634123934	0.706825181	0.77272621	0.831193	0.881663054	0.923650812	0.956752317	0.980649106	0.995111274	0.999999683	0.995267302	0.980959662	0.957214412	0.924260001	0.882413476	0.832077435	0.773736149	0.707950909	0.635354619	0.556645715	0.472581438	0.383970553	0.291665567	0.196554527	0.099552477	0.001592653	-0.096382494	-0.193430364	-0.288617281	-0.381027471	-0.469771875	-0.553996702	-0.632891641	-0.705697661	-0.77171431	-0.830306456	-0.880910396	-0.92303928	-0.956287795	-0.980336063	-0.994952721	-0.999997146	-0.995420806	-0.981267729
0.097967609	0.194992693	0.290141792	0.382499497	0.471177254	0.555321913	0.634123934	0.706825181	0.77272621	0.831193	0.881663054	0.923650812	0.956752317	0.980649106	0.995111274	0.999999683	0.995267302	0.980959662	0.957214412	0.924260001	0.882413476	0.832077435	0.773736149	0.707950909	0.635354619	0.556645715	0.472581438	0.383970553	0.291665567	0.196554527	0.099552477	0.001592653	-0.096382494	-0.193430364	-0.288617281	-0.381027471	-0.469771875	-0.553996702	-0.632891641	-0.705697661	-0.77171431	-0.830306456	-0.880910396	-0.92303928	-0.956287795	-0.980336063	-0.994952721	-0.999997146	-0.995420806	-0.981267729
0.051162855	0.186960357	0.360294188	0.510570795	0.584190493	0.552711103	0.422565467	0.233055311	0.043290813	0.08753294	0.119888068	0.047050385	0.102796481	0.276191735	0.412514503	0.464482395	0.414125776	0.278856735	0.105588435	0.045114279	0.119514064	0.088910845	0.040554009	0.229805817	0.419820644	0.551319837	0.584550246	0.51249649	0.363082991	0.189630425	0.052785595	1.39E-05	-0.049563087	-0.184300487	-0.357499149	-0.508624326	-0.583802252	-0.55407562	-0.425294195	-0.236304735	-0.046043597	-0.086128341	-0.120233556	-0.048965622	-0.100010895	-0.273516661	-0.410880334	-0.464454625	-0.415714001	-0.281511411
0.097967609	0.194992693	0.290141792	0.382499497	0.471177254	0.555321913	0.634123934	0.706825181	0.77272621	0.831193	0.881663054	0.923650812	0.956752317	0.980649106	0.995111274	0.999999683	0.995267302	0.980959662	0.957214412	0.924260001	0.882413476	0.832077435	0.773736149	0.707950909	0.635354619	0.556645715	0.472581438	0.383970553	0.291665567	0.196554527	0.099552477	0.001592653	-0.096382494	-0.193430364	-0.288617281	-0.381027471	-0.469771875	-0.553996702	-0.632891641	-0.705697661	-0.77171431	-0.830306456	-0.880910396	-0.92303928	-0.956287795	-0.980336063	-0.994952721	-0.999997146	-0.995420806	-0.981267729
0.049680969	0.181818033	0.351393139	0.500455014	0.57766569	0.555631425	0.440180514	0.268461824	0.096501985	0.019591453	0.042454101	0.034019925	0.18268311	0.352329515	0.484981325	0.535444406	0.486546696	0.35492743	0.185427552	0.035970467	0.041975002	0.020769513	0.094036352	0.265510095	0.43770728	0.554440713	0.578131328	0.502395794	0.354134771	0.184420998	0.051257506	1.35E-05	-0.0481268	-0.179225228	-0.348645951	-0.498494756	-0.577173144	-0.556796807	-0.442638491	-0.271413488	-0.098982766	-0.018388114	-0.042906265	-0.032088953	-0.179944351	-0.34972156	-0.483393658	-0.535417453	-0.488089626	-0.357515064
0.098159859	0.195757843	0.291849015	0.385499035	0.475793265	0.561845728	0.642807838	0.717876804	0.786303634	0.847400656	0.900548471	0.945202284	0.980897527	1.007254736	1.023983611	1.030886225	1.02785935	1.014895859	0.992085195	0.9596129	0.917759193	0.866896618	0.807486771	0.740076137	0.665291084	0.583832037	0.496466908	0.404023834	0.307383284	0.207469631	0.105242247	0.001686226	-0.102197192	-0.205400379	-0.306919194	-0.405762842	-0.500963651	-0.591586649	-0.676738846	-0.755578148	-0.82732178	-0.89125416	-0.94673413	-0.993201475	-1.030182659	-1.057295715	-1.074254254	-1.080870522	-1.077057502	-1.062830016
0.098159859	0.195757843	0.291849015	0.385499035	0.475793265	0.561845728	0.642807838	0.717876804	0.786303634	0.847400656	0.900548471	0.945202284	0.980897527	1.007254736	1.023983611	1.030886225	1.02785935	1.014895859	0.992085195	0.9596129	0.917759193	0.866896618	0.807486771	0.740076137	0.665291084	0.583832037	0.496466908	0.404023834	0.307383284	0.207469631	0.105242247	0.001686226	-0.102197192	-0.205400379	-0.306919194	-0.405762842	-0.500963651	-0.591586649	-0.676738846	-0.755578148	-0.82732178	-0.89125416	-0.94673413	-0.993201475	-1.030182659	-1.057295715	-1.074254254	-1.080870522	-1.077057502	-1.062830016
0.069623905	0.252713295	0.480853916	0.666930095	0.736684106	0.660214356	0.487974359	0.423631859	0.613532913	0.841926796	0.970282933	0.976768893	0.911183094	0.853607772	0.842595896	0.847933266	0.842680101	0.853065668	0.909981672	0.9760724	0.971307344	0.844987343	0.61753068	0.425002834	0.48524555	0.657892143	0.736606075	0.66914757	0.484445743	0.256283098	0.071827137	1.89E-05	-0.067451546	-0.249155794	-0.477250721	-0.664680996	-0.736721975	-0.662508026	-0.490728258	-0.422343353	-0.609540588	-0.838837595	-0.969224834	-0.977445585	-0.912387639	-0.85416412	-0.842515783	-0.847928966	-0.84276817	-0.852537783
0.097967609	0.194992693	0.290141792	0.382499497	0.471177254	0.555321913	0.634123934	0.706825181	0.77272621	0.831193	0.881663054	0.923650812	0.956752317	0.980649106	0.995111274	0.999999683	0.995267302	0.980959662	0.957214412	0.924260001	0.882413476	0.832077435	0.773736149	0.707950909	0.459454619	0.556645715	0.472581438	0.383970553	0.291665567	0.196554527	0.099552477	0.001592653	-0.096382494	-0.193430364	-0.288617281	-0.381027471	-0.469771875	-0.553996702	-0.632891641	-0.705697661	-0.77171431	-0.830306456	-0.880910396	-0.92303928	-0.956287795	-0.980336063	-0.994952721	-0.999997146	-0.995420806	-0.981267729
0.198269319	0.377581074	0.522716127	0.62511033	0.684311201	0.707663809	0.708312777	0.701986895	0.703307983	0.722472552	0.763066569	0.821508012	0.888227991	0.95028771	0.994783253	1.012197238	0.998865339	0.957938155	0.898586713	0.833635034	0.776199233	0.736170072	0.717428395	0.716514088	0.723118279	0.722321197	0.69806513	0.637041536	0.53206126	0.384094668	0.202484718	0.00327178	-0.193983584	-0.370143724	-0.510297547	-0.606568034	-0.659316385	-0.676520755	-0.67153279	-0.659779065	-0.655194084	-0.667201728	-0.698903834	-0.746832553	-0.802252409	-0.853645156	-0.889753981	-0.902456167	-0.888792968	-0.851693183
0.098159859	0.195757843	0.291849015	0.385499035	0.475793265	0.561845728	0.642807838	0.717876804	0.786303634	0.847400656	0.900548471	0.945202284	0.980897527	1.007254736	1.023983611	1.030886225	1.02785935	1.014895859	0.992085195	0.9596129	0.917759193	0.866896618	0.807486771	0.740076137	0.665291084	0.583832037	0.496466908	0.404023834	0.307383284	0.207469631	0.105242247	0.001686226	-0.102197192	-0.205400379	-0.306919194	-0.405762842	-0.500963651	-0.591586649	-0.676738846	-0.755578148	-0.82732178	-0.89125416	-0.94673413	-0.993201475	-1.030182659	-1.057295715	-1.074254254	-1.080870522	-1.077057502	-1.062830016
0.098159859	0.195757843	0.291849015	0.385499035	0.475793265	0.561845728	0.642807838	0.717876804	0.786303634	0.847400656	0.900548471	0.945202284	0.980897527	1.007254736	1.023983611	1.030886225	1.02785935	1.014895859	0.992085195	0.9596129	0.917759193	0.866896618	0.807486771	0.740076137	0.665291084	0.583832037	0.496466908	0.404023834	0.307383284	0.207469631	0.105242247	0.001686226	-0.102197192	-0.205400379	-0.306919194	-0.405762842	-0.500963651	-0.591586649	-0.676738846	-0.755578148	-0.82732178	-0.89125416	-0.94673413	-0.993201475	-1.030182659	-1.057295715	-1.074254254	-1.080870522	-1.077057502	-1.062830016
0.098153575	0.195736258	0.29180865	0.385442095	0.475727588	0.561784547	0.642769348	0.71788354	0.78638168	0.847578684	0.900856648	0.945671048	0.981556278	1.008130457	1.025099456	1.032260112	1.02950258	1.016811812	0.994268132	0.962046899	0.920417263	0.869740018	0.810464554	0.743124961	0.668335291	0.586784029	0.499227823	0.406484531	0.309425636	0.208968116	0.106065825	0.001700479	-0.103127668	-0.207409387	-0.310136165	-0.410309938	-0.506952786	-0.599116468	-0.685891737	-0.766417314	-0.839888455	-0.905565008	-0.962778896	-1.010940931	-1.049546909	-1.078182905	-1.096529726	-1.10436646	-1.101573094	-1.088132161
0.07357987	0.267122057	0.50847936	0.705877499	0.781407223	0.704826149	0.532890708	0.478196937	0.678589353	0.919172388	1.057695532	1.070967287	1.010728385	0.958267676	0.950711792	0.957150391	0.95083208	0.95779959	1.009613162	1.070362198	1.05885465	0.922424112	0.682776419	0.479741601	0.530242	0.702475836	0.781368533	0.708239742	0.512282442	0.270896613	0.075908427	2.00E-05	-0.071283951	-0.263360552	-0.50466439	-0.7034821	-0.781404059	-0.707147791	-0.535568051	-0.476733713	-0.674408504	-0.91589137	-1.056501752	-1.071552214	-1.01184676	-0.958749525	-0.950594957	-0.957145536	-0.950955595	-0.957345236
0.057970889	0.210250361	0.399359401	0.551783545	0.603745756	0.525406987	0.343178427	0.224301821	0.394709773	0.593124407	0.690059751	0.669184417	0.572819262	0.480562149	0.448436813	0.448954078	0.448340944	0.479521092	0.571055952	0.668040795	0.690617638	0.595644921	0.398338713	0.225043926	0.339906103	0.523105158	0.603532048	0.553566889	0.402326112	0.213216281	0.059804899	1.58E-05	-0.056162548	-0.207294513	-0.396382805	-0.54997297	-0.603923963	-0.527679292	-0.346457243	-0.223668576	-0.391080228	-0.590575351	-0.689469562	-0.670307213	-0.574583992	-0.48162162	-0.448541283	-0.448951802	-0.448253391	-0.478498515
0.097967609	0.194992693	0.290141792	0.382499497	0.471177254	0.555321913	0.634123934	0.706825181	0.77272621	0.831193	0.881663054	0.923650812	0.956752317	0.980649106	0.995111274	0.999999683	0.995267302	0.980959662	0.957214412	0.924260001	0.882413476	0.832077435	0.773736149	0.707950909	0.635354619	0.556645715	0.472581438	0.383970553	0.291665567	0.196554527	0.099552477	0.001592653	-0.096382494	-0.193430364	-0.288617281	-0.381027471	-0.469771875	-0.553996702	-0.632891641	-0.705697661	-0.77171431	-0.830306456	-0.880910396	-0.92303928	-0.956287795	-0.980336063	-0.994952721	-0.999997146	-0.995420806	-0.981267729
0.097967609	0.194992693	0.290141792	0.382499497	0.471177254	0.555321913	0.634123934	0.706825181	0.77272621	0.831193	0.881663054	0.923650812	0.956752317	0.980649106	0.995111274	0.999999683	0.995267302	0.980959662	0.957214412	0.924260001	0.882413476	0.832077435	0.773736149	0.707950909	0.383292119	0.556645715	0.472581438	0.383970553	0.291665567	0.196554527	0.099552477	0.001592653	-0.096382494	-0.193430364	-0.288617281	-0.381027471	-0.469771875	-0.553996702	-0.632891641	-0.705697661	-0.77171431	-0.830306456	-0.880910396	-0.92303928	-0.956287795	-0.980336063	-0.994952721	-0.999997146	-0.995420806	-0.981267729
0.097967609	0.194992693	0.290141792	0.382499497	0.471177254	0.555321913	0.634123934	0.706825181	0.77272621	0.831193	0.881663054	0.923650812	0.956752317	0.980649106	0.995111274	0.999999683	0.995267302	0.980959662	0.957214412	0.924260001	0.882413476	0.832077435	0.773736149	0.707950909	0.635354619	0.556645715	0.472581438	0.383970553	0.291665567	0.196554527	0.099552477	0.001592653	-0.096382494	-0.193430364	-0.288617281	-0.381027471	-0.469771875	-0.553996702	-0.632891641	-0.705697661	-0.77171431	-0.830306456	-0.880910396	-0.92303928	-0.956287795	-0.980336063	-0.994952721	-0.999997146	-0.995420806	-0.981267729
0.097967609	0.194992693	0.290141792	0.382499497	0.471177254	0.555321913	0.634123934	0.706825181	0.77272621	0.831193	0.881663054	0.923650812	0.956752317	0.980649106	0.995111274	0.999999683	0.995267302	0.980959662	0.957214412	0.924260001	0.882413476	0.832077435	0.773736149	0.707950909	0.635354619	0.556645715	0.472581438	0.383970553	0.291665567	0.196554527	0.099552477	0.001592653	-0.096382494	-0.193430364	-0.288617281	-0.381027471	-0.469771875	-0.553996702	-0.632891641	-0.705697661	-0.77171431	-0.830306456	-0.880910396	-0.92303928	-0.956287795	-0.980336063	-0.994952721	-0.999997146	-0.995420806	-0.981267729
0.097967609	0.194992693	0.290141792	0.382499497	0.471177254	0.555321913	0.634123934	0.706825181	0.77272621	0.831193	0.881663054	0.923650812	0.956752317	0.980649106	0.995111274	0.999999683	0.995267302	0.980959662	0.957214412	0.924260001	0.882413476	0.832077435	0.773736149	0.707950909	0.635354619	0.556645715	0.472581438	0.383970553	0.291665567	0.196554527	0.099552477	0.001592653	-0.096382494	-0.193430364	-0.288617281	-0.381027471	-0.469771875	-0.553996702	-0.632891641	-0.705697661	-0.77171431	-0.830306456	-0.880910396	-0.92303928	-0.956287795	-0.980336063	-0.994952721	-0.999997146	-0.995420806	-0.981267729
0.097967609	0.194992693	0.290141792	0.382499497	0.471177254	0.555321913	0.634123934	0.706825181	0.77272621	0.831193	0.881663054	0.923650812	0.956752317	0.980649106	0.995111274	0.999999683	0.995267302	0.980959662	0.957214412	0.924260001	0.882413476	0.832077435	0.773736149	0.707950909	1.034292119	0.556645715	0.472581438	0.383970553	0.291665567	0.196554527	0.099552477	0.001592653	-0.096382494	-0.193430364	-0.288617281	-0.381027471	-0.469771875	-0.553996702	-0.632891641	-0.705697661	-0.77171431	-0.830306456	-0.880910396	-0.92303928	-0.956287795	-0.980336063	-0.994952721	-0.999997146	-0.995420806	-0.981267729
0.097967609	0.194992693	0.290141792	0.382499497	0.471177254	0.555321913	0.634123934	0.706825181	0.77272621	0.831193	0.881663054	0.923650812	0.956752317	0.980649106	0.995111274	0.999999683	0.995267302	0.980959662	0.957214412	0.924260001	0.882413476	0.832077435	0.773736149	0.707950909	0.635354619	0.556645715	0.472581438	0.383970553	0.291665567	0.196554527	0.099552477	0.001592653	-0.096382494	-0.193430364	-0.288617281	-0.381027471	-0.469771875	-0.553996702	-0.632891641	-0.705697661	-0.77171431	-0.830306456	-0.880910396	-0.92303928	-0.956287795	-0.980336063	-0.994952721	-0.999997146	-0.995420806	-0.981267729
0.097967609	0.194992693	0.290141792	0.382499497	0.471177254	0.555321913	0.634123934	0.706825181	0.77272621	0.831193	0.881663054	0.923650812	0.956752317	0.980649106	0.995111274	0.999999683	0.995267302	0.980959662	0.957214412	0.924260001	0.882413476	0.832077435	0.773736149	0.707950909	0.635354619	0.556645715	0.472581438	0.383970553	0.291665567	0.196554527	0.099552477	0.001592653	-0.096382494	-0.193430364	-0.288617281	-0.381027471	-0.469771875	-0.553996702	-0.632891641	-0.705697661	-0.77171431	-0.830306456	-0.880910396	-0.92303928	-0.956287795	-0.980336063	-0.994952721	-0.999997146	-0.995420806	-0.981267729
0.097967609	0.194992693	0.290141792	0.382499497	0.471177254	0.555321913	0.634123934	0.706825181	0.77272621	0.831193	0.881663054	0.923650812	0.956752317	0.980649106	0.995111274	0.999999683	0.995267302	0.980959662	0.957214412	0.924260001	0.882413476	0.832077435	0.773736149	0.707950909	0.635354619	0.556645715	0.472581438	0.383970553	0.291665567	0.196554527	0.099552477	0.001592653	-0.096382494	-0.193430364	-0.288617281	-0.381027471	-0.469771875	-0.553996702	-0.632891641	-0.705697661	-0.77171431	-0.830306456	-0.880910396	-0.92303928	-0.956287795	-0.980336063	-0.994952721	-0.999997146	-0.995420806	-0.981267729
0.097967609	0.194992693	0.290141792	0.382499497	0.471177254	0.555321913	0.634123934	0.706825181	0.77272621	0.831193	0.881663054	0.923650812	0.956752317	0.980649106	0.995111274	0.999999683	0.995267302	0.980959662	0.957214412	0.924260001	0.882413476	0.832077435	0.773736149	0.707950909	0.635354619	0.556645715	0.472581438	0.383970553	0.291665567	0.196554527	0.099552477	0.001592653	-0.096382494	-0.193430364	-0.288617281	-0.381027471	-0.469771875	-0.553996702	-0.632891641	-0.705697661	-0.77171431	-0.830306456	-0.880910396	-0.92303928	-0.956287795	-0.980336063	-0.994952721	-0.999997146	-0.995420806	-0.981267729
0.097967609	0.194992693	0.290141792	0.382499497	0.471177254	0.555321913	0.634123934	0.706825181	0.77272621	0.831193	0.881663054	0.923650812	0.956752317	0.980649106	0.995111274	0.999999683	0.995267302	0.980959662	0.957214412	0.924260001	0.882413476	0.832077435	0.773736149	0.707950909	0.635354619	0.556645715	0.472581438	0.383970553	0.291665567	0.196554527	0.099552477	0.001592653	-0.096382494	-0.193430364	-0.288617281	-0.381027471	-0.469771875	-0.553996702	-0.632891641	-0.705697661	-0.77171431	-0.830306456	-0.880910396	-0.92303928	-0.956287795	-0.980336063	-0.994952721	-0.999997146	-0.995420806	-0.981267729
0.097967609	0.194992693	0.290141792	0.382499497	0.471177254	0.555321913	0.634123934	0.706825181	0.77272621	0.831193	0.881663054	0.923650812	0.956752317	0.980649106	0.995111274	0.999999683	0.995267302	0.980959662	0.957214412	0.924260001	0.882413476	0.832077435	0.773736149	0.707950909	0.873604619	0.556645715	0.472581438	0.383970553	0.291665567	0.196554527	0.099552477	0.001592653	-0.096382494	-0.193430364	-0.288617281	-0.381027471	-0.469771875	-0.553996702	-0.632891641	-0.705697661	-0.77171431	-0.830306456	-0.880910396	-0.92303928	-0.956287795	-0.980336063	-0.994952721	-0.999997146	-0.995420806	-0.981267729
0.073044675	0.265172876	0.50474291	0.700611705	0.775366114	0.698816477	0.526897411	0.471015897	0.669954781	0.908864143	1.046023088	1.058419271	0.99753227	0.944462449	0.936480633	0.942776869	0.936596328	0.94398544	0.996406805	1.057802784	1.047164414	0.912089934	0.674115481	0.472537684	0.524239586	0.696470414	0.775322254	0.702954423	0.508517434	0.268919737	0.075356277	1.99E-05	-0.070765471	-0.261438965	-0.500956568	-0.698236039	-0.775368351	-0.701133895	-0.529583424	-0.469575612	-0.665800204	-0.905609153	-1.044847239	-1.059015653	-0.998660886	-0.944953273	-0.936368468	-0.942772087	-0.936715328	-0.943522216
0.098159859	0.195757843	0.291849015	0.385499035	0.475793265	0.561845728	0.642807838	0.717876804	0.786303634	0.847400656	0.900548471	0.945202284	0.980897527	1.007254736	1.023983611	1.030886225	1.02785935	1.014895859	0.992085195	0.9596129	0.917759193	0.866896618	0.807486771	0.740076137	0.665291084	0.583832037	0.496466908	0.404023834	0.307383284	0.207469631	0.105242247	0.001686226	-0.102197192	-0.205400379	-0.306919194	-0.405762842	-0.500963651	-0.591586649	-0.676738846	-0.755578148	-0.82732178	-0.89125416	-0.94673413	-0.993201475	-1.030182659	-1.057295715	-1.074254254	-1.080870522	-1.077057502	-1.062830016
0.097967609	0.194992693	0.290141792	0.382499497	0.471177254	0.555321913	0.634123934	0.706825181	0.77272621	0.831193	0.881663054	0.923650812	0.956752317	0.980649106	0.995111274	0.999999683	0.995267302	0.980959662	0.957214412	0.924260001	0.882413476	0.832077435	0.773736149	0.707950909	0.635354619	0.556645715	0.472581438	0.383970553	0.291665567	0.196554527	0.099552477	0.001592653	-0.096382494	-0.193430364	-0.288617281	-0.381027471	-0.469771875	-0.553996702	-0.632891641	-0.705697661	-0.77171431	-0.830306456	-0.880910396	-0.92303928	-0.956287795	-0.980336063	-0.994952721	-0.999997146	-0.995420806	-0.981267729
0.097967609	0.194992693	0.290141792	0.382499497	0.471177254	0.555321913	0.634123934	0.706825181	0.77272621	0.831193	0.881663054	0.923650812	0.956752317	0.980649106	0.995111274	0.999999683	0.995267302	0.980959662	0.957214412	0.924260001	0.882413476	0.832077435	0.773736149	0.707950909	0.862392119	0.556645715	0.472581438	0.383970553	0.291665567	0.196554527	0.099552477	0.001592653	-0.096382494	-0.193430364	-0.288617281	-0.381027471	-0.469771875	-0.553996702	-0.632891641	-0.705697661	-0.77171431	-0.830306456	-0.880910396	-0.92303928	-0.956287795	-0.980336063	-0.994952721	-0.999997146	-0.995420806	-0.981267729
0.098159859	0.195757843	0.291849015	0.385499035	0.475793265	0.561845728	0.642807838	0.717876804	0.786303634	0.847400656	0.900548471	0.945202284	0.980897527	1.007254736	1.023983611	1.030886225	1.02785935	1.014895859	0.992085195	0.9596129	0.917759193	0.866896618	0.807486771	0.740076137	0.665291084	0.583832037	0.496466908	0.404023834	0.307383284	0.207469631	0.105242247	0.001686226	-0.102197192	-0.205400379	-0.306919194	-0.405762842	-0.500963651	-0.591586649	-0.676738846	-0.755578148	-0.82732178	-0.89125416	-0.94673413	-0.993201475	-1.030182659	-1.057295715	-1.074254254	-1.080870522	-1.077057502	-1.062830016
0.02928399	0.109130272	0.218146317	0.32854532	0.415160299	0.463457571	0.473868934	0.461005335	0.448041432	0.45818861	0.506155527	0.592499429	0.702797038	0.811938818	0.892122214	0.921870034	0.893050417	0.813542698	0.704654268	0.594155575	0.507270502	0.458642841	0.447966299	0.460728018	0.473790648	0.463906653	0.41627005	0.330198199	0.220003684	0.110738053	0.030218998	7.90E-06	-0.028362608	-0.107530322	-0.216289254	-0.326885931	-0.414040109	-0.462998182	-0.473940891	-0.461282626	-0.448122848	-0.457744668	-0.505051007	-0.59084984	-0.700939566	-0.810327164	-0.891180417	-0.921854237	-0.893964959	-0.815138689
0.097967609	0.194992693	0.290141792	0.382499497	0.471177254	0.555321913	0.634123934	0.706825181	0.77272621	0.831193	0.881663054	0.923650812	0.956752317	0.980649106	0.995111274	0.999999683	0.995267302	0.980959662	0.957214412	0.924260001	0.882413476	0.832077435	0.773736149	0.707950909	0.897679619	0.556645715	0.472581438	0.383970553	0.291665567	0.196554527	0.099552477	0.001592653	-0.096382494	-0.193430364	-0.288617281	-0.381027471	-0.469771875	-0.553996702	-0.632891641	-0.705697661	-0.77171431	-0.830306456	-0.880910396	-0.92303928	-0.956287795	-0.980336063	-0.994952721	-0.999997146	-0.995420806	-0.981267729
0.05337637	0.193765463	0.368662081	0.510676741	0.560553859	0.487563829	0.30038553	0.044794267	0.211089751	0.399050547	0.473057661	0.424103265	0.282624469	0.107718608	0.033196399	0.087410786	0.034873772	0.104985845	0.279868651	0.422415155	0.473212908	0.401240547	0.214847845	0.04044605	0.296618201	0.485358378	0.560381969	0.512352361	0.371413437	0.196502907	0.055065561	1.45E-05	-0.051710856	-0.191037452	-0.365901877	-0.508976194	-0.560692475	-0.489738345	-0.304134323	-0.049142404	-0.207313253	-0.396829677	-0.472869115	-0.425766342	-0.285371289	-0.110460663	-0.031495433	-0.087381756	-0.036527385	-0.102262656
0.098159859	0.195757843	0.291849015	0.385499035	0.475793265	0.561845728	0.642807838	0.717876804	0.786303634	0.847400656	0.900548471	0.945202284	0.980897527	1.007254736	1.023983611	1.030886225	1.02785935	1.014895859	0.992085195	0.9596129	0.917759193	0.866896618	0.807486771	0.740076137	0.665291084	0.583832037	0.496466908	0.404023834	0.307383284	0.207469631	0.105242247	0.001686226	-0.102197192	-0.205400379	-0.306919194	-0.405762842	-0.500963651	-0.591586649	-0.676738846	-0.755578148	-0.82732178	-0.89125416	-0.94673413	-0.993201475	-1.030182659	-1.057295715	-1.074254254	-1.080870522	-1.077057502	-1.062830016
0.097967609	0.194992693	0.290141792	0.382499497	0.471177254	0.555321913	0.634123934	0.706825181	0.77272621	0.831193	0.881663054	0.923650812	0.956752317	0.980649106	0.995111274	0.999999683	0.995267302	0.980959662	0.957214412	0.924260001	0.882413476	0.832077435	0.773736149	0.707950909	0.635354619	0.556645715	0.472581438	0.383970553	0.291665567	0.196554527	0.099552477	0.001592653	-0.096382494	-0.193430364	-0.288617281	-0.381027471	-0.469771875	-0.553996702	-0.632891641	-0.705697661	-0.77171431	-0.830306456	-0.880910396	-0.92303928	-0.956287795	-0.980336063	-0.994952721	-0.999997146	-0.995420806	-0.981267729
0.097967609	0.194992693	0.290141792	0.382499497	0.471177254	0.555321913	0.634123934	0.706825181	0.77272621	0.831193	0.881663054	0.923650812	0.956752317	0.980649106	0.995111274	0.999999683	0.995267302	0.980959662	0.957214412	0.924260001	0.882413476	0.832077435	0.773736149	0.707950909	0.635354619	0.556645715	0.472581438	0.383970553	0.291665567	0.196554527	0.099552477	0.001592653	-0.096382494	-0.193430364	-0.288617281	-0.381027471	-0.469771875	-0.553996702	-0.632891641	-0.705697661	-0.77171431	-0.830306456	-0.880910396	-0.92303928	-0.956287795	-0.980336063	-0.994952721	-0.999997146	-0.995420806	-0.981267729
0.097967609	0.194992693	0.290141792	0.382499497	0.471177254	0.555321913	0.634123934	0.706825181	0.77272621	0.831193	0.881663054	0.923650812	0.956752317	0.980649106	0.995111274	0.999999683	0.995267302	0.980959662	0.957214412	0.924260001	0.882413476	0.832077435	0.773736149	0.707950909	0.635354619	0.556645715	0.472581438	0.383970553	0.291665567	0.196554527	0.099552477	0.001592653	-0.096382494	-0.193430364	-0.288617281	-0.381027471	-0.469771875	-0.553996702	-0.632891641	-0.705697661	-0.77171431	-0.830306456	-0.880910396	-0.92303928	-0.956287795	-0.980336063	-0.994952721	-0.999997146	-0.995420806	-0.981267729
0.097967609	0.194992693	0.290141792	0.382499497	0.471177254	0.555321913	0.634123934	0.706825181	0.77272621	0.831193	0.881663054	0.923650812	0.956752317	0.980649106	0.995111274	0.999999683	0.995267302	0.980959662	0.957214412	0.924260001	0.882413476	0.832077435	0.773736149	0.707950909	0.635354619	0.556645715	0.472581438	0.383970553	0.291665567	0.196554527	0.099552477	0.001592653	-0.096382494	-0.193430364	-0.288617281	-0.381027471	-0.469771875	-0.553996702	-0.632891641	-0.705697661	-0.77171431	-0.830306456	-0.880910396	-0.92303928	-0.956287795	-0.980336063	-0.994952721	-0.999997146	-0.995420806	-0.981267729
0.097967609	0.194992693	0.290141792	0.382499497	0.471177254	0.555321913	0.634123934	0.706825181	0.77272621	0.831193	0.881663054	0.923650812	0.956752317	0.980649106	0.995111274	0.999999683	0.995267302	0.980959662	0.957214412	0.924260001	0.882413476	0.832077435	0.773736149	0.707950909	0.520692119	0.556645715	0.472581438	0.383970553	0.291665567	0.196554527	0.099552477	0.001592653	-0.096382494	-0.193430364	-0.288617281	-0.381027471	-0.469771875	-0.553996702	-0.632891641	-0.705697661	-0.77171431	-0.830306456	-0.880910396	-0.92303928	-0.956287795	-0.980336063	-0.994952721	-0.999997146	-0.995420806	-0.981267729
0.025950362	0.097129251	0.195687486	0.298374331	0.383985221	0.439988551	0.466119817	0.473756868	0.481314047	0.507235882	0.56298049	0.64838631	0.751012091	0.849699782	0.92118467	0.947546668	0.922008396	0.851136714	0.752709509	0.649963033	0.564147919	0.507885881	0.481544408	0.473826232	0.46634767	0.440634484	0.385148606	0.299948695	0.197385411	0.098569838	0.026780166	6.99E-06	-0.025132729	-0.095696	-0.193990601	-0.296795269	-0.382813754	-0.439334481	-0.46588693	-0.473687483	-0.481088685	-0.506594008	-0.561821156	-0.646814325	-0.749313685	-0.848255562	-0.920348801	-0.947532689	-0.922819922	-0.852566261
0.097967609	0.194992693	0.290141792	0.382499497	0.471177254	0.555321913	0.634123934	0.706825181	0.77272621	0.831193	0.881663054	0.923650812	0.956752317	0.980649106	0.995111274	0.999999683	0.995267302	0.980959662	0.957214412	0.924260001	0.882413476	0.832077435	0.773736149	0.707950909	0.635354619	0.556645715	0.472581438	0.383970553	0.291665567	0.196554527	0.099552477	0.001592653	-0.096382494	-0.193430364	-0.288617281	-0.381027471	-0.469771875	-0.553996702	-0.632891641	-0.705697661	-0.77171431	-0.830306456	-0.880910396	-0.92303928	-0.956287795	-0.980336063	-0.994952721	-0.999997146	-0.995420806	-0.981267729
0.207423347	0.380396649	0.4970407	0.555434468	0.572874431	0.57754954	0.596375845	0.644250462	0.719178536	0.80500051	0.880048572	0.927518242	0.942770227	0.934387802	0.918823579	0.911470839	0.918606072	0.934144333	0.942784583	0.928016186	0.881070551	0.806361877	0.720541468	0.645278796	0.596903148	0.577681109	0.572970906	0.555976745	0.498429793	0.382773501	0.210587833	0.003467292	-0.204249492	-0.378004494	-0.495635817	-0.554881151	-0.572774626	-0.57742198	-0.595856589	-0.643229584	-0.717818601	-0.803636188	-0.879019041	-0.927011499	-0.942749461	-0.934629406	-0.919043466	-0.911474948	-0.918390996	-0.933899075
0.098072053	0.1954103	0.291077946	0.384152142	0.473732848	0.558951508	0.638979439	0.713035863	0.780395502	0.840395656	0.892442711	0.936017989	0.970682912	0.996083398	1.011953472	1.018118038	1.014494787	1.001095227	0.978024812	0.945482174	0.903757461	0.85322979	0.794363843	0.727705636	0.653877483	0.573572231	0.487546789	0.396615029	0.301640116	0.203526344	0.103210554	0.001653211	-0.100170771	-0.201281373	-0.300702885	-0.39747332	-0.490653709	-0.579337218	-0.66265797	-0.739799508	-0.810002807	-0.872573753	-0.926890024	-0.972407293	-1.008664709	-1.035289573	-1.052001194	-1.058613858	-1.055038885	-1.041285768
0.098110883	0.195565557	0.291425988	0.38476656	0.474682963	0.560300914	0.640784612	0.715344862	0.78324678	0.843817007	0.896450356	0.940615841	0.975862008	1.001821536	1.01821504	1.024854054	1.021643154	1.008581199	0.985761673	0.953372124	0.911692697	0.861093782	0.802032778	0.73505002	0.660763886	0.579865147	0.493110586	0.401315975	0.30534844	0.206118316	0.104570549	0.001675725	-0.101579172	-0.204200209	-0.305196054	-0.403587534	-0.498417128	-0.588758279	-0.673724453	-0.752477844	-0.82423765	-0.888287829	-0.943984264	-0.990761263	-1.028137323	-1.05572011	-1.073210594	-1.080406295	-1.07720361	-1.063599189
0.229116575	0.433569361	0.593610594	0.698243591	0.74713763	0.750213677	0.72501522	0.692477643	0.672071532	0.677435848	0.713500971	0.775752245	0.851779805	0.924716677	0.977713041	0.998340806	0.981834435	0.932353409	0.861935393	0.787381497	0.725835784	0.690159777	0.685271755	0.706398547	0.739726073	0.76534649	0.761830396	0.711344285	0.604088623	0.440986908	0.233971939	0.003788607	-0.224179017	-0.425088312	-0.579635965	-0.677746475	-0.720152823	-0.717577317	-0.687779906	-0.651219731	-0.626364477	-0.625721733	-0.653458517	-0.705077884	-0.769133912	-0.830502398	-0.874387134	-0.890100386	-0.873734632	-0.829115854
0.097967609	0.194992693	0.290141792	0.382499497	0.471177254	0.555321913	0.634123934	0.706825181	0.77272621	0.831193	0.881663054	0.923650812	0.956752317	0.980649106	0.995111274	0.999999683	0.995267302	0.980959662	0.957214412	0.924260001	0.882413476	0.832077435	0.773736149	0.707950909	0.635354619	0.556645715	0.472581438	0.383970553	0.291665567	0.196554527	0.099552477	0.001592653	-0.096382494	-0.193430364	-0.288617281	-0.381027471	-0.469771875	-0.553996702	-0.632891641	-0.705697661	-0.77171431	-0.830306456	-0.880910396	-0.92303928	-0.956287795	-0.980336063	-0.994952721	-0.999997146	-0.995420806	-0.981267729
0.097967609	0.194992693	0.290141792	0.382499497	0.471177254	0.555321913	0.634123934	0.706825181	0.77272621	0.831193	0.881663054	0.923650812	0.956752317	0.980649106	0.995111274	0.999999683	0.995267302	0.980959662	0.957214412	0.924260001	0.882413476	0.832077435	0.773736149	0.707950909	1.100329619	0.556645715	0.472581438	0.383970553	0.291665567	0.196554527	0.099552477	0.001592653	-0.096382494	-0.193430364	-0.288617281	-0.381027471	-0.469771875	-0.553996702	-0.632891641	-0.705697661	-0.77171431	-0.830306456	-0.880910396	-0.92303928	-0.956287795	-0.980336063	-0.994952721	-0.999997146	-0.995420806	-0.981267729
0.098159948	0.19576174	0.291865774	0.385542938	0.475883528	0.562006023	0.643065627	0.718262512	0.786849655	0.848140224	0.901514415	0.946425684	0.982406313	1.009072246	1.026127155	1.033365681	1.030675827	1.01804047	0.995537968	0.963341861	0.921719658	0.87103072	0.811723241	0.744330381	0.669465543	0.587816873	0.500140998	0.407256088	0.310034276	0.209393532	0.106289038	0.001704174	-0.103358826	-0.207888451	-0.31087362	-0.411313453	-0.508226981	-0.600662729	-0.687708057	-0.768498185	-0.842224792	-0.908144129	-0.96558454	-1.013953332	-1.052742911	-1.08153613	-1.100010784	-1.107943211	-1.105210947	-1.091794419
0.052280001	0.190775764	0.366660017	0.517148158	0.586776297	0.546261454	0.402586084	0.196902561	0.009046556	0.153430454	0.194861667	0.126054841	0.023975975	0.199911589	0.338939498	0.392041729	0.340585202	0.202624896	0.026796262	0.124145443	0.194592908	0.154994908	0.012030854	0.19338289	0.399593411	0.544683033	0.587030124	0.51904658	0.36947684	0.193494124	0.053937393	1.42E-05	-0.050646023	-0.188067576	-0.363836336	-0.515227833	-0.58649262	-0.547811914	-0.405561948	-0.200422161	-0.006045568	-0.151838094	-0.19510055	-0.127942238	-0.021162684	-0.197188242	-0.337270458	-0.392013341	-0.342207415	-0.205327902
0.098159859	0.195757843	0.291849015	0.385499035	0.475793265	0.561845728	0.642807838	0.717876804	0.786303634	0.847400656	0.900548471	0.945202284	0.980897527	1.007254736	1.023983611	1.030886225	1.02785935	1.014895859	0.992085195	0.9596129	0.917759193	0.866896618	0.807486771	0.740076137	0.665291084	0.583832037	0.496466908	0.404023834	0.307383284	0.207469631	0.105242247	0.001686226	-0.102197192	-0.205400379	-0.306919194	-0.405762842	-0.500963651	-0.591586649	-0.676738846	-0.755578148	-0.82732178	-0.89125416	-0.94673413	-0.993201475	-1.030182659	-1.057295715	-1.074254254	-1.080870522	-1.077057502	-1.062830016
0.098159859	0.195757843	0.291849015	0.385499035	0.475793265	0.561845728	0.642807838	0.717876804	0.786303634	0.847400656	0.900548471	0.945202284	0.980897527	1.007254736	1.023983611	1.030886225	1.02785935	1.014895859	0.992085195	0.9596129	0.917759193	0.866896618	0.807486771	0.740076137	0.665291084	0.583832037	0.496466908	0.404023834	0.307383284	0.207469631	0.105242247	0.001686226	-0.102197192	-0.205400379	-0.306919194	-0.405762842	-0.500963651	-0.591586649	-0.676738846	-0.755578148	-0.82732178	-0.89125416	-0.94673413	-0.993201475	-1.030182659	-1.057295715	-1.074254254	-1.080870522	-1.077057502	-1.062830016
0.097967609	0.194992693	0.290141792	0.382499497	0.471177254	0.555321913	0.634123934	0.706825181	0.77272621	0.831193	0.881663054	0.923650812	0.956752317	0.980649106	0.995111274	0.999999683	0.995267302	0.980959662	0.957214412	0.924260001	0.882413476	0.832077435	0.773736149	0.707950909	0.635354619	0.556645715	0.472581438	0.383970553	0.291665567	0.196554527	0.099552477	0.001592653	-0.096382494	-0.193430364	-0.288617281	-0.381027471	-0.469771875	-0.553996702	-0.632891641	-0.705697661	-0.77171431	-0.830306456	-0.880910396	-0.92303928	-0.956287795	-0.980336063	-0.994952721	-0.999997146	-0.995420806	-0.981267729
0.17777365	0.330228506	0.441192712	0.509017612	0.546041387	0.572535481	0.60785736	0.662635617	0.735227168	0.813703002	0.88214685	0.928201305	0.948380726	0.948841474	0.941488636	0.937481616	0.941373235	0.948749597	0.94851799	0.928730717	0.883096223	0.814936037	0.736495786	0.663692614	0.608578696	0.572994503	0.54649694	0.50981581	0.44262138	0.332386149	0.180510567	0.002959324	-0.175029851	-0.328059595	-0.439752354	-0.508211117	-0.545583083	-0.572078989	-0.607141436	-0.661583551	-0.733960192	-0.812467239	-0.88119137	-0.92766485	-0.948238133	-0.948931311	-0.941605074	-0.937483908	-0.94125891	-0.948655737
0.097967609	0.194992693	0.290141792	0.382499497	0.471177254	0.555321913	0.634123934	0.706825181	0.77272621	0.831193	0.881663054	0.923650812	0.956752317	0.980649106	0.995111274	0.999999683	0.995267302	0.980959662	0.957214412	0.924260001	0.882413476	0.832077435	0.773736149	0.707950909	0.635354619	0.556645715	0.472581438	0.383970553	0.291665567	0.196554527	0.099552477	0.001592653	-0.096382494	-0.193430364	-0.288617281	-0.381027471	-0.469771875	-0.553996702	-0.632891641	-0.705697661	-0.77171431	-0.830306456	-0.880910396	-0.92303928	-0.956287795	-0.980336063	-0.994952721	-0.999997146	-0.995420806	-0.981267729
0.098159859	0.195757843	0.291849015	0.385499035	0.475793265	0.561845728	0.642807838	0.717876804	0.786303634	0.847400656	0.900548471	0.945202284	0.980897527	1.007254736	1.023983611	1.030886225	1.02785935	1.014895859	0.992085195	0.9596129	0.917759193	0.866896618	0.807486771	0.740076137	0.665291084	0.583832037	0.496466908	0.404023834	0.307383284	0.207469631	0.105242247	0.001686226	-0.102197192	-0.205400379	-0.306919194	-0.405762842	-0.500963651	-0.591586649	-0.676738846	-0.755578148	-0.82732178	-0.89125416	-0.94673413	-0.993201475	-1.030182659	-1.057295715	-1.074254254	-1.080870522	-1.077057502	-1.062830016
0.097967609	0.194992693	0.290141792	0.382499497	0.471177254	0.555321913	0.634123934	0.706825181	0.77272621	0.831193	0.881663054	0.923650812	0.956752317	0.980649106	0.995111274	0.999999683	0.995267302	0.980959662	0.957214412	0.924260001	0.882413476	0.832077435	0.773736149	0.707950909	0.635354619	0.556645715	0.472581438	0.383970553	0.291665567	0.196554527	0.099552477	0.001592653	-0.096382494	-0.193430364	-0.288617281	-0.381027471	-0.469771875	-0.553996702	-0.632891641	-0.705697661	-0.77171431	-0.830306456	-0.880910396	-0.92303928	-0.956287795	-0.980336063	-0.994952721	-0.999997146	-0.995420806	-0.981267729
0.258453505	0.466641434	0.592800494	0.634540915	0.617751844	0.584341223	0.574322171	0.609989066	0.688740045	0.787088819	0.873405672	0.923183777	0.929786668	0.906003026	0.876164268	0.86299881	0.875769341	0.905495881	0.929586524	0.92362513	0.874550871	0.788669488	0.690262919	0.610963904	0.574509138	0.583901006	0.61722147	0.634634823	0.594115828	0.469392709	0.262353296	0.004341849	-0.254540041	-0.463867866	-0.591462265	-0.634431219	-0.618277887	-0.584788018	-0.574147822	-0.609026064	-0.687222521	-0.785504809	-0.872250425	-0.922730593	-0.929978536	-0.906508614	-0.876563905	-0.863006073	-0.875379202	-0.904987296
0.097967609	0.194992693	0.290141792	0.382499497	0.471177254	0.555321913	0.634123934	0.706825181	0.77272621	0.831193	0.881663054	0.923650812	0.956752317	0.980649106	0.995111274	0.999999683	0.995267302	0.980959662	0.957214412	0.924260001	0.882413476	0.832077435	0.773736149	0.707950909	0.635354619	0.556645715	0.472581438	0.383970553	0.291665567	0.196554527	0.099552477	0.001592653	-0.096382494	-0.193430364	-0.288617281	-0.381027471	-0.469771875	-0.553996702	-0.632891641	-0.705697661	-0.77171431	-0.830306456	-0.880910396	-0.92303928	-0.956287795	-0.980336063	-0.994952721	-0.999997146	-0.995420806	-0.981267729
0.097967609	0.194992693	0.290141792	0.382499497	0.471177254	0.555321913	0.634123934	0.706825181	0.77272621	0.831193	0.881663054	0.923650812	0.956752317	0.980649106	0.995111274	0.999999683	0.995267302	0.980959662	0.957214412	0.924260001	0.882413476	0.832077435	0.773736149	0.707950909	0.635354619	0.556645715	0.472581438	0.383970553	0.291665567	0.196554527	0.099552477	0.001592653	-0.096382494	-0.193430364	-0.288617281	-0.381027471	-0.469771875	-0.553996702	-0.632891641	-0.705697661	-0.77171431	-0.830306456	-0.880910396	-0.92303928	-0.956287795	-0.980336063	-0.994952721	-0.999997146	-0.995420806	-0.981267729
0.097967609	0.194992693	0.290141792	0.382499497	0.471177254	0.555321913	0.634123934	0.706825181	0.77272621	0.831193	0.881663054	0.923650812	0.956752317	0.980649106	0.995111274	0.999999683	0.995267302	0.980959662	0.957214412	0.924260001	0.882413476	0.832077435	0.773736149	0.707950909	0.635354619	0.556645715	0.472581438	0.383970553	0.291665567	0.196554527	0.099552477	0.001592653	-0.096382494	-0.193430364	-0.288617281	-0.381027471	-0.469771875	-0.553996702	-0.632891641	-0.705697661	-0.77171431	-0.830306456	-0.880910396	-0.92303928	-0.956287795	-0.980336063	-0.994952721	-0.999997146	-0.995420806	-0.981267729
0.058201401	0.211090688	0.400973652	0.554069043	0.606397814	0.528139307	0.346322034	0.229428442	0.39971165	0.598520763	0.696104977	0.67596298	0.580659594	0.489799871	0.458541836	0.459215584	0.458452556	0.488779859	0.578917506	0.674833103	0.696673776	0.601051108	0.403341213	0.23018649	0.343068659	0.525838351	0.606187166	0.555861118	0.403952781	0.214068568	0.060042716	1.58E-05	-0.056385859	-0.208122926	-0.397984611	-0.552249653	-0.606572875	-0.530410789	-0.349582547	-0.228777647	-0.396081767	-0.595961924	-0.695503889	-0.67707212	-0.582403223	-0.490838132	-0.458639514	-0.459213256	-0.458371393	-0.487778157
0.098159859	0.195757843	0.291849015	0.385499035	0.475793265	0.561845728	0.642807838	0.717876804	0.786303634	0.847400656	0.900548471	0.945202284	0.980897527	1.007254736	1.023983611	1.030886225	1.02785935	1.014895859	0.992085195	0.9596129	0.917759193	0.866896618	0.807486771	0.740076137	0.665291084	0.583832037	0.496466908	0.404023834	0.307383284	0.207469631	0.105242247	0.001686226	-0.102197192	-0.205400379	-0.306919194	-0.405762842	-0.500963651	-0.591586649	-0.676738846	-0.755578148	-0.82732178	-0.89125416	-0.94673413	-0.993201475	-1.030182659	-1.057295715	-1.074254254	-1.080870522	-1.077057502	-1.062830016
0.097967609	0.194992693	0.290141792	0.382499497	0.471177254	0.555321913	0.634123934	0.706825181	0.77272621	0.831193	0.881663054	0.923650812	0.956752317	0.980649106	0.995111274	0.999999683	0.995267302	0.980959662	0.957214412	0.924260001	0.882413476	0.832077435	0.773736149	0.707950909	0.635354619	0.556645715	0.472581438	0.383970553	0.291665567	0.196554527	0.099552477	0.001592653	-0.096382494	-0.193430364	-0.288617281	-0.381027471	-0.469771875	-0.553996702	-0.632891641	-0.705697661	-0.77171431	-0.830306456	-0.880910396	-0.92303928	-0.956287795	-0.980336063	-0.994952721	-0.999997146	-0.995420806	-0.981267729
0.097967609	0.194992693	0.290141792	0.382499497	0.471177254	0.555321913	0.634123934	0.706825181	0.77272621	0.831193	0.881663054	0.923650812	0.956752317	0.980649106	0.995111274	0.999999683	0.995267302	0.980959662	0.957214412	0.924260001	0.882413476	0.832077435	0.773736149	0.707950909	0.935104619	0.556645715	0.472581438	0.383970553	0.291665567	0.196554527	0.099552477	0.001592653	-0.096382494	-0.193430364	-0.288617281	-0.381027471	-0.469771875	-0.553996702	-0.632891641	-0.705697661	-0.77171431	-0.830306456	-0.880910396	-0.92303928	-0.956287795	-0.980336063	-0.994952721	-0.999997146	-0.995420806	-0.981267729
0.098159859	0.195757843	0.291849015	0.385499035	0.475793265	0.561845728	0.642807838	0.717876804	0.786303634	0.847400656	0.900548471	0.945202284	0.980897527	1.007254736	1.023983611	1.030886225	1.02785935	1.014895859	0.992085195	0.9596129	0.917759193	0.866896618	0.807486771	0.740076137	0.665291084	0.583832037	0.496466908	0.404023834	0.307383284	0.207469631	0.105242247	0.001686226	-0.102197192	-0.205400379	-0.306919194	-0.405762842	-0.500963651	-0.591586649	-0.676738846	-0.755578148	-0.82732178	-0.89125416	-0.94673413	-0.993201475	-1.030182659	-1.057295715	-1.074254254	-1.080870522	-1.077057502	-1.062830016
0.097967609	0.194992693	0.290141792	0.382499497	0.471177254	0.555321913	0.634123934	0.706825181	0.77272621	0.831193	0.881663054	0.923650812	0.956752317	0.980649106	0.995111274	0.999999683	0.995267302	0.980959662	0.957214412	0.924260001	0.882413476	0.832077435	0.773736149	0.707950909	0.635354619	0.556645715	0.472581438	0.383970553	0.291665567	0.196554527	0.099552477	0.001592653	-0.096382494	-0.193430364	-0.288617281	-0.381027471	-0.469771875	-0.553996702	-0.632891641	-0.705697661	-0.77171431	-0.830306456	-0.880910396	-0.92303928	-0.956287795	-0.980336063	-0.994952721	-0.999997146	-0.995420806	-0.981267729
0.052493617	0.19149394	0.3678132	0.518210796	0.586836765	0.544237976	0.397519435	0.188229744	0.021327937	0.168761486	0.212285334	0.14448914	0.00544508	0.181813291	0.321346879	0.374665998	0.322999136	0.184535413	0.008269392	0.142587793	0.212041539	0.170368288	0.024367571	0.184649909	0.394471351	0.542617077	0.587065482	0.520101045	0.370633978	0.194221106	0.054157601	1.43E-05	-0.050853128	-0.188776928	-0.364985423	-0.516298399	-0.586577906	-0.545830653	-0.400550559	-0.191809506	-0.018271463	-0.16712652	-0.212498961	-0.14636824	-0.002627905	-0.179081146	-0.319671207	-0.37463749	-0.324627818	-0.187247249
0.098159859	0.195757843	0.291849015	0.385499035	0.475793265	0.561845728	0.642807838	0.717876804	0.786303634	0.847400656	0.900548471	0.945202284	0.980897527	1.007254736	1.023983611	1.030886225	1.02785935	1.014895859	0.992085195	0.9596129	0.917759193	0.866896618	0.807486771	0.740076137	0.665291084	0.583832037	0.496466908	0.404023834	0.307383284	0.207469631	0.105242247	0.001686226	-0.102197192	-0.205400379	-0.306919194	-0.405762842	-0.500963651	-0.591586649	-0.676738846	-0.755578148	-0.82732178	-0.89125416	-0.94673413	-0.993201475	-1.030182659	-1.057295715	-1.074254254	-1.080870522	-1.077057502	-1.062830016
0.098159859	0.195757843	0.291849015	0.385499035	0.475793265	0.561845728	0.642807838	0.717876804	0.786303634	0.847400656	0.900548471	0.945202284	0.980897527	1.007254736	1.023983611	1.030886225	1.02785935	1.014895859	0.992085195	0.9596129	0.917759193	0.866896618	0.807486771	0.740076137	0.665291084	0.583832037	0.496466908	0.404023834	0.307383284	0.207469631	0.105242247	0.001686226	-0.102197192	-0.205400379	-0.306919194	-0.405762842	-0.500963651	-0.591586649	-0.676738846	-0.755578148	-0.82732178	-0.89125416	-0.94673413	-0.993201475	-1.030182659	-1.057295715	-1.074254254	-1.080870522	-1.077057502	-1.062830016
0.214346103	0.406769005	0.559695872	0.663298094	0.717186069	0.730043041	0.717299121	0.697388333	0.6874518	0.699474557	0.737740879	0.79818381	0.869757886	0.937482815	0.986404013	1.005491418	0.990508379	0.945129738	0.880016203	0.810058585	0.750466277	0.712674013	0.701102016	0.711608173	0.732062514	0.744953641	0.731432911	0.675840874	0.569632407	0.413754045	0.218895082	0.003541113	-0.209720609	-0.398787365	-0.546465188	-0.643734197	-0.691148405	-0.698111624	-0.680265974	-0.655652947	-0.640562504	-0.646020803	-0.675683072	-0.725546598	-0.78546736	-0.842053241	-0.882208171	-0.896476531	-0.881406567	-0.840393338
0.06792309	0.246517565	0.468971368	0.650166312	0.717402595	0.64088641	0.468170467	0.398927532	0.584559135	0.80787603	0.931796277	0.935105018	0.86674648	0.806435066	0.793663832	0.798485207	0.793730642	0.805853976	0.865498917	0.934363228	0.93276017	0.810854902	0.588480545	0.400219992	0.465396615	0.63857367	0.717306778	0.652321202	0.472472242	0.249999304	0.070072438	1.85E-05	-0.065803856	-0.243047805	-0.465459347	-0.647980451	-0.717458962	-0.643170609	-0.470967664	-0.3977185	-0.580642753	-0.804868721	-0.930799063	-0.935827101	-0.867997128	-0.807030689	-0.793601451	-0.798481157	-0.793801651	-0.805287397
0.098126055	0.195626222	0.291561981	0.385006635	0.475054208	0.560828176	0.641489959	0.716247072	0.784360879	0.845153854	0.89801629	0.94241239	0.977885672	1.004063638	1.020661664	1.027486062	1.024436283	1.011506243	0.988784749	0.956455017	0.914793285	0.864166532	0.805029312	0.73791974	0.663454657	0.58232402	0.495284566	0.403152807	0.306797418	0.207131095	0.105101949	0.001684523	-0.102129486	-0.205340706	-0.3069517	-0.405976582	-0.501450581	-0.592439434	-0.678048534	-0.757431736	-0.829799726	-0.894427895	-0.950663612	-0.997932833	-1.035745988	-1.063703071	-1.081497886	-1.0889214	-1.085864181	-1.072317862
0.098155205	0.195742773	0.291823256	0.385467878	0.475767459	0.561841175	0.642845101	0.717980436	0.786501333	0.84772226	0.901024827	0.945863995	0.981773616	1.008371255	1.02536222	1.032542786	1.029802558	1.017125958	0.994592806	0.962377997	0.920750262	0.870070027	0.810786377	0.743433165	0.668624276	0.587048108	0.499461305	0.406681804	0.309581254	0.209076887	0.106122896	0.001701424	-0.103186771	-0.207531875	-0.310324719	-0.410566519	-0.507278574	-0.599511819	-0.686356137	-0.766949355	-0.840485814	-0.906224443	-0.963496248	-1.011711147	-1.050364068	-1.079040264	-1.09741977	-1.10528097	-1.102503227	-1.089068534
0.098159859	0.195757843	0.291849015	0.385499035	0.475793265	0.561845728	0.642807838	0.717876804	0.786303634	0.847400656	0.900548471	0.945202284	0.980897527	1.007254736	1.023983611	1.030886225	1.02785935	1.014895859	0.992085195	0.9596129	0.917759193	0.866896618	0.807486771	0.740076137	0.665291084	0.583832037	0.496466908	0.404023834	0.307383284	0.207469631	0.105242247	0.001686226	-0.102197192	-0.205400379	-0.306919194	-0.405762842	-0.500963651	-0.591586649	-0.676738846	-0.755578148	-0.82732178	-0.89125416	-0.94673413	-0.993201475	-1.030182659	-1.057295715	-1.074254254	-1.080870522	-1.077057502	-1.062830016
0.097967609	0.194992693	0.290141792	0.382499497	0.471177254	0.555321913	0.634123934	0.706825181	0.77272621	0.831193	0.881663054	0.923650812	0.956752317	0.980649106	0.995111274	0.999999683	0.995267302	0.980959662	0.957214412	0.924260001	0.882413476	0.832077435	0.773736149	0.707950909	0.398967119	0.556645715	0.472581438	0.383970553	0.291665567	0.196554527	0.099552477	0.001592653	-0.096382494	-0.193430364	-0.288617281	-0.381027471	-0.469771875	-0.553996702	-0.632891641	-0.705697661	-0.77171431	-0.830306456	-0.880910396	-0.92303928	-0.956287795	-0.980336063	-0.994952721	-0.999997146	-0.995420806	-0.981267729
0.097967609	0.194992693	0.290141792	0.382499497	0.471177254	0.555321913	0.634123934	0.706825181	0.77272621	0.831193	0.881663054	0.923650812	0.956752317	0.980649106	0.995111274	0.999999683	0.995267302	0.980959662	0.957214412	0.924260001	0.882413476	0.832077435	0.773736149	0.707950909	0.635354619	0.556645715	0.472581438	0.383970553	0.291665567	0.196554527	0.099552477	0.001592653	-0.096382494	-0.193430364	-0.288617281	-0.381027471	-0.469771875	-0.553996702	-0.632891641	-0.705697661	-0.77171431	-0.830306456	-0.880910396	-0.92303928	-0.956287795	-0.980336063	-0.994952721	-0.999997146	-0.995420806	-0.981267729
0.097967609	0.194992693	0.290141792	0.382499497	0.471177254	0.555321913	0.634123934	0.706825181	0.77272621	0.831193	0.881663054	0.923650812	0.956752317	0.980649106	0.995111274	0.999999683	0.995267302	0.980959662	0.957214412	0.924260001	0.882413476	0.832077435	0.773736149	0.707950909	0.635354619	0.556645715	0.472581438	0.383970553	0.291665567	0.196554527	0.099552477	0.001592653	-0.096382494	-0.193430364	-0.288617281	-0.381027471	-0.469771875	-0.553996702	-0.632891641	-0.705697661	-0.77171431	-0.830306456	-0.880910396	-0.92303928	-0.956287795	-0.980336063	-0.994952721	-0.999997146	-0.995420806	-0.981267729
0.069688952	0.252950237	0.481308291	0.667570981	0.737420844	0.660951664	0.488725329	0.424559876	0.614627751	0.843218109	0.97174307	0.978347072	0.912860855	0.855382698	0.844434266	0.849790781	0.844519109	0.854841985	0.911661072	0.977652231	0.972769761	0.846281788	0.61862851	0.425933802	0.485998101	0.658629055	0.737343481	0.669790845	0.484903596	0.256523408	0.071894245	1.90E-05	-0.067514561	-0.24938938	-0.477701611	-0.665319467	-0.737458016	-0.663245729	-0.491477712	-0.42326839	-0.610632449	-0.840125767	-0.970682676	-0.979022108	-0.914063761	-0.855937645	-0.844353501	-0.849786471	-0.844607805	-0.854315479
0.045746798	0.167977862	0.326704121	0.470377336	0.553174969	0.550331817	0.466359585	0.33339121	0.200212692	0.115681423	0.112120445	0.194286201	0.337630333	0.496446074	0.619160717	0.665628496	0.620603696	0.49885892	0.340225638	0.196226446	0.112798616	0.114923636	0.19833465	0.331089574	0.464474921	0.549563036	0.553841517	0.472309299	0.329297349	0.170395622	0.047200123	1.24E-05	-0.044314196	-0.165569983	-0.324106796	-0.468428852	-0.552485186	-0.551078589	-0.468230958	-0.335692789	-0.202103931	-0.116461175	-0.111465532	-0.192362561	-0.335039239	-0.494023455	-0.617697078	-0.665603703	-0.622025889	-0.50126178
0.098103508	0.195536069	0.291359885	0.384649864	0.474502509	0.560044623	0.640441758	0.714906317	0.782705241	0.843167195	0.89568919	0.939742578	0.97487835	1.0007317	1.01702579	1.023574692	1.020285475	1.0071594	0.984292223	0.951873597	0.91018557	0.859600186	0.800576229	0.733655112	0.659455962	0.578669943	0.492053863	0.400423131	0.304644123	0.205626027	0.104312247	0.001671449	-0.101311676	-0.203645839	-0.304342673	-0.40242627	-0.496942634	-0.586968951	-0.671622613	-0.750069867	-0.821534048	-0.885303278	-0.940737581	-0.987275321	-1.024438918	-1.051839769	-1.069182325	-1.07626729	-1.072993897	-1.059361235
0.258249426	0.466296785	0.592418469	0.634226584	0.617575759	0.584318833	0.574416319	0.610132881	0.688869086	0.787168066	0.873440107	0.923209311	0.929847228	0.906125648	0.876344345	0.863202274	0.875950132	0.905619565	0.92964795	0.923650896	0.874584818	0.788747862	0.690391327	0.611107943	0.574604663	0.583880924	0.617047915	0.634322305	0.593734113	0.46904657	0.262146279	0.004338351	-0.254338919	-0.463524735	-0.591079959	-0.634115093	-0.618099276	-0.584763309	-0.574240573	-0.609169637	-0.687352186	-0.78558493	-0.872285358	-0.922755906	-0.930038238	-0.906630174	-0.876743259	-0.863209525	-0.875560698	-0.905112041
0.097967609	0.194992693	0.290141792	0.382499497	0.471177254	0.555321913	0.634123934	0.706825181	0.77272621	0.831193	0.881663054	0.923650812	0.956752317	0.980649106	0.995111274	0.999999683	0.995267302	0.980959662	0.957214412	0.924260001	0.882413476	0.832077435	0.773736149	0.707950909	0.635354619	0.556645715	0.472581438	0.383970553	0.291665567	0.196554527	0.099552477	0.001592653	-0.096382494	-0.193430364	-0.288617281	-0.381027471	-0.469771875	-0.553996702	-0.632891641	-0.705697661	-0.77171431	-0.830306456	-0.880910396	-0.92303928	-0.956287795	-0.980336063	-0.994952721	-0.999997146	-0.995420806	-0.981267729
0.097967609	0.194992693	0.290141792	0.382499497	0.471177254	0.555321913	0.634123934	0.706825181	0.77272621	0.831193	0.881663054	0.923650812	0.956752317	0.980649106	0.995111274	0.999999683	0.995267302	0.980959662	0.957214412	0.924260001	0.882413476	0.832077435	0.773736149	0.707950909	0.635354619	0.556645715	0.472581438	0.383970553	0.291665567	0.196554527	0.099552477	0.001592653	-0.096382494	-0.193430364	-0.288617281	-0.381027471	-0.469771875	-0.553996702	-0.632891641	-0.705697661	-0.77171431	-0.830306456	-0.880910396	-0.92303928	-0.956287795	-0.980336063	-0.994952721	-0.999997146	-0.995420806	-0.981267729
0.097967609	0.194992693	0.290141792	0.382499497	0.471177254	0.555321913	0.634123934	0.706825181	0.77272621	0.831193	0.881663054	0.923650812	0.956752317	0.980649106	0.995111274	0.999999683	0.995267302	0.980959662	0.957214412	0.924260001	0.882413476	0.832077435	0.773736149	0.707950909	0.367767119	0.556645715	0.472581438	0.383970553	0.291665567	0.196554527	0.099552477	0.001592653	-0.096382494	-0.193430364	-0.288617281	-0.381027471	-0.469771875	-0.553996702	-0.632891641	-0.705697661	-0.77171431	-0.830306456	-0.880910396	-0.92303928	-0.956287795	-0.980336063	-0.994952721	-0.999997146	-0.995420806	-0.981267729
0.097967609	0.194992693	0.290141792	0.382499497	0.471177254	0.555321913	0.634123934	0.706825181	0.77272621	0.831193	0.881663054	0.923650812	0.956752317	0.980649106	0.995111274	0.999999683	0.995267302	0.980959662	0.957214412	0.924260001	0.882413476	0.832077435	0.773736149	0.707950909	0.323892119	0.556645715	0.472581438	0.383970553	0.291665567	0.196554527	0.099552477	0.001592653	-0.096382494	-0.193430364	-0.288617281	-0.381027471	-0.469771875	-0.553996702	-0.632891641	-0.705697661	-0.77171431	-0.830306456	-0.880910396	-0.92303928	-0.956287795	-0.980336063	-0.994952721	-0.999997146	-0.995420806	-0.981267729
0.246700779	0.446789913	0.570787538	0.616411833	0.607566197	0.582988363	0.579664958	0.618180872	0.696074222	0.791551368	0.87528415	0.924545236	0.933159465	0.912943704	0.886408821	0.87458834	0.886054949	0.912497604	0.933009064	0.924999903	0.87640117	0.79308171	0.697560533	0.619168509	0.579931042	0.582680778	0.607181208	0.616609913	0.572120508	0.449455284	0.25043129	0.004140397	-0.242957589	-0.444103865	-0.569433314	-0.616199061	-0.607947086	-0.583301933	-0.579410436	-0.617204058	-0.694592715	-0.790017773	-0.874157657	-0.924079439	-0.933302022	-0.913388175	-0.886766864	-0.874594873	-0.885705319	-0.912049983
0.097967609	0.194992693	0.290141792	0.382499497	0.471177254	0.555321913	0.634123934	0.706825181	0.77272621	0.831193	0.881663054	0.923650812	0.956752317	0.980649106	0.995111274	0.999999683	0.995267302	0.980959662	0.957214412	0.924260001	0.882413476	0.832077435	0.773736149	0.707950909	0.635354619	0.556645715	0.472581438	0.383970553	0.291665567	0.196554527	0.099552477	0.001592653	-0.096382494	-0.193430364	-0.288617281	-0.381027471	-0.469771875	-0.553996702	-0.632891641	-0.705697661	-0.77171431	-0.830306456	-0.880910396	-0.92303928	-0.956287795	-0.980336063	-0.994952721	-0.999997146	-0.995420806	-0.981267729
0.097967609	0.194992693	0.290141792	0.382499497	0.471177254	0.555321913	0.634123934	0.706825181	0.77272621	0.831193	0.881663054	0.923650812	0.956752317	0.980649106	0.995111274	0.999999683	0.995267302	0.980959662	0.957214412	0.924260001	0.882413476	0.832077435	0.773736149	0.707950909	0.942117119	0.556645715	0.472581438	0.383970553	0.291665567	0.196554527	0.099552477	0.001592653	-0.096382494	-0.193430364	-0.288617281	-0.381027471	-0.469771875	-0.553996702	-0.632891641	-0.705697661	-0.77171431	-0.830306456	-0.880910396	-0.92303928	-0.956287795	-0.980336063	-0.994952721	-0.999997146	-0.995420806	-0.981267729
0.059269131	0.214982855	0.408449488	0.56465062	0.618668081	0.540753072	0.360681384	0.25205612	0.422351432	0.623174242	0.723747497	0.706847324	0.616055009	0.530931936	0.503177254	0.504507361	0.503115	0.529997005	0.61440155	0.705777	0.724365556	0.625750934	0.425990437	0.252884783	0.357509085	0.538455303	0.618471367	0.566483045	0.411486103	0.218016121	0.061144281	1.61E-05	-0.057420231	-0.211959911	-0.405402828	-0.562790487	-0.618828805	-0.543021575	-0.363863549	-0.251328604	-0.418713243	-0.620569238	-0.723097176	-0.707897258	-0.617710457	-0.531884417	-0.503247101	-0.504504803	-0.503060071	-0.529079666
0.098067346	0.195391478	0.291035752	0.384077655	0.473617665	0.558787918	0.638760596	0.712755941	0.780049839	0.839980883	0.89195686	0.935460587	0.970055045	0.995387757	1.011194376	1.017301424	1.013628184	1.000187696	0.977086865	0.944525668	0.902795465	0.85227643	0.793434131	0.726815269	0.653042637	0.572809335	0.486872285	0.396045129	0.301190552	0.203212117	0.103045681	0.001650482	-0.10000003	-0.200927519	-0.300158174	-0.396732088	-0.489712543	-0.578195094	-0.661316369	-0.738262501	-0.808277103	-0.870668721	-0.924817673	-0.970182224	-1.006304025	-1.032812759	-1.049429959	-1.05597194	-1.052351834	-1.038580691
0.097967609	0.194992693	0.290141792	0.382499497	0.471177254	0.555321913	0.634123934	0.706825181	0.77272621	0.831193	0.881663054	0.923650812	0.956752317	0.980649106	0.995111274	0.999999683	0.995267302	0.980959662	0.957214412	0.924260001	0.882413476	0.832077435	0.773736149	0.707950909	0.431967119	0.556645715	0.472581438	0.383970553	0.291665567	0.196554527	0.099552477	0.001592653	-0.096382494	-0.193430364	-0.288617281	-0.381027471	-0.469771875	-0.553996702	-0.632891641	-0.705697661	-0.77171431	-0.830306456	-0.880910396	-0.92303928	-0.956287795	-0.980336063	-0.994952721	-0.999997146	-0.995420806	-0.981267729
0.097967609	0.194992693	0.290141792	0.382499497	0.471177254	0.555321913	0.634123934	0.706825181	0.77272621	0.831193	0.881663054	0.923650812	0.956752317	0.980649106	0.995111274	0.999999683	0.995267302	0.980959662	0.957214412	0.924260001	0.882413476	0.832077435	0.773736149	0.707950909	0.635354619	0.556645715	0.472581438	0.383970553	0.291665567	0.196554527	0.099552477	0.001592653	-0.096382494	-0.193430364	-0.288617281	-0.381027471	-0.469771875	-0.553996702	-0.632891641	-0.705697661	-0.77171431	-0.830306456	-0.880910396	-0.92303928	-0.956287795	-0.980336063	-0.994952721	-0.999997146	-0.995420806	-0.981267729
0.037558833	0.138820338	0.273335987	0.40173653	0.488761258	0.514825126	0.482240494	0.41401279	0.345631942	0.31264141	0.338189111	0.424770653	0.552962925	0.687590829	0.789264975	0.827417052	0.790452237	0.689605437	0.55520471	0.426598285	0.339131696	0.312551503	0.344728671	0.412800824	0.481332403	0.514727262	0.489695557	0.403558516	0.275576897	0.140839408	0.038754693	1.02E-05	-0.036380193	-0.136810233	-0.27109337	-0.399903283	-0.487810397	-0.514907063	-0.483138909	-0.415224714	-0.34654482	-0.312747214	-0.337263109	-0.422954344	-0.550722933	-0.685567337	-0.788060542	-0.827396739	-0.791622231	-0.691610998
0.097967609	0.194992693	0.290141792	0.382499497	0.471177254	0.555321913	0.634123934	0.706825181	0.77272621	0.831193	0.881663054	0.923650812	0.956752317	0.980649106	0.995111274	0.999999683	0.995267302	0.980959662	0.957214412	0.924260001	0.882413476	0.832077435	0.773736149	0.707950909	0.635354619	0.556645715	0.472581438	0.383970553	0.291665567	0.196554527	0.099552477	0.001592653	-0.096382494	-0.193430364	-0.288617281	-0.381027471	-0.469771875	-0.553996702	-0.632891641	-0.705697661	-0.77171431	-0.830306456	-0.880910396	-0.92303928	-0.956287795	-0.980336063	-0.994952721	-0.999997146	-0.995420806	-0.981267729
0.029868574	0.111232691	0.222073008	0.333800516	0.420547984	0.467428936	0.475000456	0.458448174	0.44179196	0.449089572	0.495627439	0.582092083	0.693710983	0.804676293	0.886382944	0.916724499	0.887329463	0.806309372	0.695595984	0.583761619	0.496732333	0.449508255	0.441661794	0.458108511	0.474867023	0.467842278	0.421647445	0.335466624	0.223958078	0.112869713	0.030822025	8.06E-06	-0.028929005	-0.109603585	-0.220188108	-0.332127575	-0.419437666	-0.467004902	-0.475127331	-0.458787808	-0.441928637	-0.448681562	-0.49453342	-0.580429428	-0.691825875	-0.803035357	-0.885422579	-0.916708383	-0.888262065	-0.807934476
0.097967609	0.194992693	0.290141792	0.382499497	0.471177254	0.555321913	0.634123934	0.706825181	0.77272621	0.831193	0.881663054	0.923650812	0.956752317	0.980649106	0.995111274	0.999999683	0.995267302	0.980959662	0.957214412	0.924260001	0.882413476	0.832077435	0.773736149	0.707950909	0.635354619	0.556645715	0.472581438	0.383970553	0.291665567	0.196554527	0.099552477	0.001592653	-0.096382494	-0.193430364	-0.288617281	-0.381027471	-0.469771875	-0.553996702	-0.632891641	-0.705697661	-0.77171431	-0.830306456	-0.880910396	-0.92303928	-0.956287795	-0.980336063	-0.994952721	-0.999997146	-0.995420806	-0.981267729
0.041364838	0.152411446	0.298355899	0.434290861	0.520144552	0.533955197	0.478999467	0.382384803	0.285591309	0.230160708	0.2433645	0.328690447	0.464363562	0.610411301	0.721904174	0.763921687	0.723210408	0.612612423	0.4667743	0.330580205	0.244200257	0.229782534	0.284261554	0.380694573	0.477664079	0.5335677	0.520970525	0.436173796	0.300765237	0.154617258	0.042680486	1.12E-05	-0.040068047	-0.15021506	-0.295943811	-0.432394316	-0.519299021	-0.534324031	-0.48032355	-0.384074985	-0.286932289	-0.23055751	-0.242548323	-0.326814371	-0.461955671	-0.608200846	-0.72057914	-0.763899293	-0.724497729	-0.614804026
0.098159859	0.195757843	0.291849015	0.385499035	0.475793265	0.561845728	0.642807838	0.717876804	0.786303634	0.847400656	0.900548471	0.945202284	0.980897527	1.007254736	1.023983611	1.030886225	1.02785935	1.014895859	0.992085195	0.9596129	0.917759193	0.866896618	0.807486771	0.740076137	0.665291084	0.583832037	0.496466908	0.404023834	0.307383284	0.207469631	0.105242247	0.001686226	-0.102197192	-0.205400379	-0.306919194	-0.405762842	-0.500963651	-0.591586649	-0.676738846	-0.755578148	-0.82732178	-0.89125416	-0.94673413	-0.993201475	-1.030182659	-1.057295715	-1.074254254	-1.080870522	-1.077057502	-1.062830016
0.098159859	0.195757843	0.291849015	0.385499035	0.475793265	0.561845728	0.642807838	0.717876804	0.786303634	0.847400656	0.900548471	0.945202284	0.980897527	1.007254736	1.023983611	1.030886225	1.02785935	1.014895859	0.992085195	0.9596129	0.917759193	0.866896618	0.807486771	0.740076137	0.665291084	0.583832037	0.496466908	0.404023834	0.307383284	0.207469631	0.105242247	0.001686226	-0.102197192	-0.205400379	-0.306919194	-0.405762842	-0.500963651	-0.591586649	-0.676738846	-0.755578148	-0.82732178	-0.89125416	-0.94673413	-0.993201475	-1.030182659	-1.057295715	-1.074254254	-1.080870522	-1.077057502	-1.062830016
0.097967609	0.194992693	0.290141792	0.382499497	0.471177254	0.555321913	0.634123934	0.706825181	0.77272621	0.831193	0.881663054	0.923650812	0.956752317	0.980649106	0.995111274	0.999999683	0.995267302	0.980959662	0.957214412	0.924260001	0.882413476	0.832077435	0.773736149	0.707950909	0.635354619	0.556645715	0.472581438	0.383970553	0.291665567	0.196554527	0.099552477	0.001592653	-0.096382494	-0.193430364	-0.288617281	-0.381027471	-0.469771875	-0.553996702	-0.632891641	-0.705697661	-0.77171431	-0.830306456	-0.880910396	-0.92303928	-0.956287795	-0.980336063	-0.994952721	-0.999997146	-0.995420806	-0.981267729
0.098159859	0.195757843	0.291849015	0.385499035	0.475793265	0.561845728	0.642807838	0.717876804	0.786303634	0.847400656	0.900548471	0.945202284	0.980897527	1.007254736	1.023983611	1.030886225	1.02785935	1.014895859	0.992085195	0.9596129	0.917759193	0.866896618	0.807486771	0.740076137	0.665291084	0.583832037	0.496466908	0.404023834	0.307383284	0.207469631	0.105242247	0.001686226	-0.102197192	-0.205400379	-0.306919194	-0.405762842	-0.500963651	-0.591586649	-0.676738846	-0.755578148	-0.82732178	-0.89125416	-0.94673413	-0.993201475	-1.030182659	-1.057295715	-1.074254254	-1.080870522	-1.077057502	-1.062830016
0.097967609	0.194992693	0.290141792	0.382499497	0.471177254	0.555321913	0.634123934	0.706825181	0.77272621	0.831193	0.881663054	0.923650812	0.956752317	0.980649106	0.995111274	0.999999683	0.995267302	0.980959662	0.957214412	0.924260001	0.882413476	0.832077435	0.773736149	0.707950909	0.635354619	0.556645715	0.472581438	0.383970553	0.291665567	0.196554527	0.099552477	0.001592653	-0.096382494	-0.193430364	-0.288617281	-0.381027471	-0.469771875	-0.553996702	-0.632891641	-0.705697661	-0.77171431	-0.830306456	-0.880910396	-0.92303928	-0.956287795	-0.980336063	-0.994952721	-0.999997146	-0.995420806	-0.981267729
0.260670704	0.470385717	0.596950486	0.637954877	0.61966312	0.584581956	0.573296159	0.608423007	0.687334216	0.786223814	0.873027392	0.922902032	0.929124147	0.904665982	0.874202816	0.860783194	0.87380013	0.904147299	0.928914596	0.923340854	0.874177894	0.787813965	0.688863969	0.609395397	0.573468149	0.584116654	0.619105249	0.638029071	0.598262449	0.473153176	0.264602426	0.004379857	-0.256725121	-0.467595661	-0.595615319	-0.637864689	-0.620216617	-0.58505395	-0.573136985	-0.607462644	-0.685809916	-0.784630306	-0.871866734	-0.922451247	-0.929325341	-0.905183122	-0.874610314	-0.860790594	-0.873402336	-0.903627191
0.097967609	0.194992693	0.290141792	0.382499497	0.471177254	0.555321913	0.634123934	0.706825181	0.77272621	0.831193	0.881663054	0.923650812	0.956752317	0.980649106	0.995111274	0.999999683	0.995267302	0.980959662	0.957214412	0.924260001	0.882413476	0.832077435	0.773736149	0.707950909	0.635354619	0.556645715	0.472581438	0.383970553	0.291665567	0.196554527	0.099552477	0.001592653	-0.096382494	-0.193430364	-0.288617281	-0.381027471	-0.469771875	-0.553996702	-0.632891641	-0.705697661	-0.77171431	-0.830306456	-0.880910396	-0.92303928	-0.956287795	-0.980336063	-0.994952721	-0.999997146	-0.995420806	-0.981267729
0.097967609	0.194992693	0.290141792	0.382499497	0.471177254	0.555321913	0.634123934	0.706825181	0.77272621	0.831193	0.881663054	0.923650812	0.956752317	0.980649106	0.995111274	0.999999683	0.995267302	0.980959662	0.957214412	0.924260001	0.882413476	0.832077435	0.773736149	0.707950909	0.635354619	0.556645715	0.472581438	0.383970553	0.291665567	0.196554527	0.099552477	0.001592653	-0.096382494	-0.193430364	-0.288617281	-0.381027471	-0.469771875	-0.553996702	-0.632891641	-0.705697661	-0.77171431	-0.830306456	-0.880910396	-0.92303928	-0.956287795	-0.980336063	-0.994952721	-0.999997146	-0.995420806	-0.981267729
0.097967609	0.194992693	0.290141792	0.382499497	0.471177254	0.555321913	0.634123934	0.706825181	0.77272621	0.831193	0.881663054	0.923650812	0.956752317	0.980649106	0.995111274	0.999999683	0.995267302	0.980959662	0.957214412	0.924260001	0.882413476	0.832077435	0.773736149	0.707950909	1.119529619	0.556645715	0.472581438	0.383970553	0.291665567	0.196554527	0.099552477	0.001592653	-0.096382494	-0.193430364	-0.288617281	-0.381027471	-0.469771875	-0.553996702	-0.632891641	-0.705697661	-0.77171431	-0.830306456	-0.880910396	-0.92303928	-0.956287795	-0.980336063	-0.994952721	-0.999997146	-0.995420806	-0.981267729
0.098150872	0.195725447	0.291784416	0.385399313	0.475661431	0.561690588	0.642643653	0.717722764	0.786183145	0.847340455	0.900577595	0.945350899	0.981195657	1.00773091	1.024663463	1.031791082	1.029004838	1.016290563	0.993729413	0.961497521	0.919864732	0.869192447	0.809930565	0.742613571	0.66785579	0.586345852	0.498840415	0.406157203	0.309167425	0.208787637	0.105971128	0.001698911	-0.103029601	-0.207206149	-0.309823305	-0.409884205	-0.506412218	-0.598460479	-0.685121177	-0.76553452	-0.838897281	-0.904470836	-0.961588622	-1.009662942	-1.048191029	-1.076760325	-1.095052914	-1.102849051	-1.100029762	-1.086578475
0.097967609	0.194992693	0.290141792	0.382499497	0.471177254	0.555321913	0.634123934	0.706825181	0.77272621	0.831193	0.881663054	0.923650812	0.956752317	0.980649106	0.995111274	0.999999683	0.995267302	0.980959662	0.957214412	0.924260001	0.882413476	0.832077435	0.773736149	0.707950909	0.849492119	0.556645715	0.472581438	0.383970553	0.291665567	0.196554527	0.099552477	0.001592653	-0.096382494	-0.193430364	-0.288617281	-0.381027471	-0.469771875	-0.553996702	-0.632891641	-0.705697661	-0.77171431	-0.830306456	-0.880910396	-0.92303928	-0.956287795	-0.980336063	-0.994952721	-0.999997146	-0.995420806	-0.981267729
0.193482272	0.356813135	0.47080012	0.533650259	0.560325612	0.575287578	0.601893642	0.653031252	0.726871035	0.809244975	0.881192868	0.928003735	0.945581329	0.941366328	0.929670421	0.923893643	0.929501011	0.94119428	0.94565363	0.928516602	0.882180798	0.810546083	0.728189745	0.65407328	0.602512511	0.575573541	0.560591383	0.534313279	0.472208114	0.359087065	0.196445749	0.003228434	-0.190510597	-0.354525802	-0.469378265	-0.53297749	-0.560056784	-0.575004929	-0.601281581	-0.651995491	-0.725554683	-0.807941019	-0.880198064	-0.927482896	-0.945503127	-0.941536427	-0.929841578	-0.923896896	-0.929333393	-0.941020352
0.097967609	0.194992693	0.290141792	0.382499497	0.471177254	0.555321913	0.634123934	0.706825181	0.77272621	0.831193	0.881663054	0.923650812	0.956752317	0.980649106	0.995111274	0.999999683	0.995267302	0.980959662	0.957214412	0.924260001	0.882413476	0.832077435	0.773736149	0.707950909	0.461704619	0.556645715	0.472581438	0.383970553	0.291665567	0.196554527	0.099552477	0.001592653	-0.096382494	-0.193430364	-0.288617281	-0.381027471	-0.469771875	-0.553996702	-0.632891641	-0.705697661	-0.77171431	-0.830306456	-0.880910396	-0.92303928	-0.956287795	-0.980336063	-0.994952721	-0.999997146	-0.995420806	-0.981267729
0.097967609	0.194992693	0.290141792	0.382499497	0.471177254	0.555321913	0.634123934	0.706825181	0.77272621	0.831193	0.881663054	0.923650812	0.956752317	0.980649106	0.995111274	0.999999683	0.995267302	0.980959662	0.957214412	0.924260001	0.882413476	0.832077435	0.773736149	0.707950909	0.635354619	0.556645715	0.472581438	0.383970553	0.291665567	0.196554527	0.099552477	0.001592653	-0.096382494	-0.193430364	-0.288617281	-0.381027471	-0.469771875	-0.553996702	-0.632891641	-0.705697661	-0.77171431	-0.830306456	-0.880910396	-0.92303928	-0.956287795	-0.980336063	-0.994952721	-0.999997146	-0.995420806	-0.981267729
0.05347832	0.193869091	0.367875513	0.507158269	0.551817835	0.471413275	0.277929975	0.082582536	0.285483717	0.481210903	0.565249115	0.52661589	0.398787559	0.251674749	0.172440369	0.165280808	0.171967933	0.24963104	0.396323211	0.525107663	0.565567348	0.483560403	0.289293472	0.08290863	0.274137525	0.469078883	0.551540343	0.508769938	0.37059966	0.196601787	0.055169955	1.45E-05	-0.051810346	-0.191145598	-0.365142025	-0.505520999	-0.55206143	-0.473716763	-0.281709232	-0.082509033	-0.281660732	-0.47883087	-0.564897576	-0.528099816	-0.401246246	-0.253737895	-0.172934684	-0.165279972	-0.171516913	-0.247607166
0.072878751	0.264568571	0.503584459	0.698978974	0.773492649	0.696951776	0.525034412	0.468778034	0.667268091	0.905659925	1.042395256	1.054517531	0.99342532	0.940162026	0.93204585	0.938297577	0.932160105	0.939682191	0.9922966	1.053897455	1.043531041	0.908877679	0.671420659	0.470292693	0.522373662	0.694607004	0.773447178	0.701315636	0.507350128	0.268306846	0.075185097	1.98E-05	-0.07060473	-0.260843215	-0.499806994	-0.69660943	-0.77349657	-0.699267911	-0.527723211	-0.4673449	-0.663121618	-0.902413	-1.041224991	-1.05511752	-0.99455719	-0.940655693	-0.931935149	-0.938292818	-0.932277688	-0.939216157
0.053589653	0.194911781	0.372228021	0.519089643	0.576971572	0.515327774	0.342301425	0.102467127	0.137653151	0.311443372	0.374078328	0.317091829	0.170742839	0.006598575	0.14845512	0.202886674	0.150140242	0.009356037	0.167930521	0.315300806	0.374076091	0.313424001	0.141164543	0.09837927	0.338781014	0.513332071	0.576957614	0.520868598	0.3750362	0.197674119	0.055286682	1.46E-05	-0.051916479	-0.192159265	-0.369411637	-0.517286605	-0.576953153	-0.517293298	-0.345803733	-0.106554906	-0.134123784	-0.309432624	-0.374048162	-0.318858664	-0.173546806	-0.003831431	-0.146746226	-0.202857544	-0.151801426	-0.01210354
0.097967609	0.194992693	0.290141792	0.382499497	0.471177254	0.555321913	0.634123934	0.706825181	0.77272621	0.831193	0.881663054	0.923650812	0.956752317	0.980649106	0.995111274	0.999999683	0.995267302	0.980959662	0.957214412	0.924260001	0.882413476	0.832077435	0.773736149	0.707950909	0.635354619	0.556645715	0.472581438	0.383970553	0.291665567	0.196554527	0.099552477	0.001592653	-0.096382494	-0.193430364	-0.288617281	-0.381027471	-0.469771875	-0.553996702	-0.632891641	-0.705697661	-0.77171431	-0.830306456	-0.880910396	-0.92303928	-0.956287795	-0.980336063	-0.994952721	-0.999997146	-0.995420806	-0.981267729
0.063918707	0.231928021	0.440980573	0.610646078	0.671858956	0.59496549	0.420061247	0.336577759	0.51319665	0.725180679	0.838475302	0.833461944	0.75693844	0.68819734	0.670235475	0.673686087	0.670254228	0.687497133	0.755549752	0.83259354	0.839288585	0.727969588	0.516957592	0.337672542	0.417146458	0.592667495	0.671718837	0.612652672	0.444266959	0.235202329	0.065941183	1.74E-05	-0.061924557	-0.228664927	-0.437683556	-0.608610037	-0.671961264	-0.597234786	-0.422994423	-0.335570763	-0.509439422	-0.72236365	-0.837629399	-0.834310646	-0.758329998	-0.688913056	-0.67022219	-0.673682671	-0.670278212	-0.686812433
0.097967609	0.194992693	0.290141792	0.382499497	0.471177254	0.555321913	0.634123934	0.706825181	0.77272621	0.831193	0.881663054	0.923650812	0.956752317	0.980649106	0.995111274	0.999999683	0.995267302	0.980959662	0.957214412	0.924260001	0.882413476	0.832077435	0.773736149	0.707950909	1.076067119	0.556645715	0.472581438	0.383970553	0.291665567	0.196554527	0.099552477	0.001592653	-0.096382494	-0.193430364	-0.288617281	-0.381027471	-0.469771875	-0.553996702	-0.632891641	-0.705697661	-0.77171431	-0.830306456	-0.880910396	-0.92303928	-0.956287795	-0.980336063	-0.994952721	-0.999997146	-0.995420806	-0.981267729
0.035084508	0.129959834	0.256930902	0.38014825	0.467414486	0.500669297	0.481636123	0.430745763	0.37971843	0.360322746	0.39311835	0.479994307	0.603036527	0.730124621	0.825390302	0.861029383	0.82650015	0.732017057	0.605165444	0.481775147	0.394119856	0.360405718	0.379074993	0.429826226	0.480988376	0.500745173	0.468408645	0.381924178	0.259059263	0.131856572	0.03620242	9.48E-06	-0.033982746	-0.128071738	-0.254801467	-0.378362527	-0.466405642	-0.500579216	-0.482275218	-0.431665263	-0.380370457	-0.360253952	-0.392131546	-0.478223322	-0.600908761	-0.728223617	-0.82426435	-0.861010421	-0.827593805	-0.733900776
0.097967609	0.194992693	0.290141792	0.382499497	0.471177254	0.555321913	0.634123934	0.706825181	0.77272621	0.831193	0.881663054	0.923650812	0.956752317	0.980649106	0.995111274	0.999999683	0.995267302	0.980959662	0.957214412	0.924260001	0.882413476	0.832077435	0.773736149	0.707950909	0.635354619	0.556645715	0.472581438	0.383970553	0.291665567	0.196554527	0.099552477	0.001592653	-0.096382494	-0.193430364	-0.288617281	-0.381027471	-0.469771875	-0.553996702	-0.632891641	-0.705697661	-0.77171431	-0.830306456	-0.880910396	-0.92303928	-0.956287795	-0.980336063	-0.994952721	-0.999997146	-0.995420806	-0.981267729
0.097967609	0.194992693	0.290141792	0.382499497	0.471177254	0.555321913	0.634123934	0.706825181	0.77272621	0.831193	0.881663054	0.923650812	0.956752317	0.980649106	0.995111274	0.999999683	0.995267302	0.980959662	0.957214412	0.924260001	0.882413476	0.832077435	0.773736149	0.707950909	0.635354619	0.556645715	0.472581438	0.383970553	0.291665567	0.196554527	0.099552477	0.001592653	-0.096382494	-0.193430364	-0.288617281	-0.381027471	-0.469771875	-0.553996702	-0.632891641	-0.705697661	-0.77171431	-0.830306456	-0.880910396	-0.92303928	-0.956287795	-0.980336063	-0.994952721	-0.999997146	-0.995420806	-0.981267729
0.097967609	0.194992693	0.290141792	0.382499497	0.471177254	0.555321913	0.634123934	0.706825181	0.77272621	0.831193	0.881663054	0.923650812	0.956752317	0.980649106	0.995111274	0.999999683	0.995267302	0.980959662	0.957214412	0.924260001	0.882413476	0.832077435	0.773736149	0.707950909	0.635354619	0.556645715	0.472581438	0.383970553	0.291665567	0.196554527	0.099552477	0.001592653	-0.096382494	-0.193430364	-0.288617281	-0.381027471	-0.469771875	-0.553996702	-0.632891641	-0.705697661	-0.77171431	-0.830306456	-0.880910396	-0.92303928	-0.956287795	-0.980336063	-0.994952721	-0.999997146	-0.995420806	-0.981267729
0.215759351	0.394493855	0.512715052	0.568425335	0.580319672	0.578819998	0.592974124	0.638883099	0.714453049	0.80233155	0.879228982	0.927086895	0.94094077	0.930058361	0.91217476	0.903877251	0.911928417	0.929772062	0.940920346	0.927575808	0.880271242	0.803728879	0.715842317	0.639903059	0.593446391	0.578858883	0.580314523	0.568895061	0.514092591	0.396932121	0.219044005	0.003610129	-0.212464629	-0.392039148	-0.511320566	-0.567943795	-0.580321328	-0.578785541	-0.592510648	-0.637871308	-0.71306716	-0.800931203	-0.878178763	-0.92658869	-0.94095448	-0.930342845	-0.91242386	-0.903881872	-0.911684889	-0.92948403
0.069600182	0.25262688	0.480688199	0.666696354	0.736415399	0.659945419	0.487700359	0.423293111	0.613133383	0.841455649	0.969750199	0.976193048	0.910570819	0.852959933	0.841924853	0.847255231	0.842008824	0.85241732	0.909368797	0.975495951	0.970773778	0.844515053	0.61713006	0.424663009	0.484970971	0.657623349	0.736337123	0.668912957	0.484278759	0.256195454	0.071802662	1.89E-05	-0.067428564	-0.249070602	-0.477086275	-0.664448135	-0.736453521	-0.662238945	-0.490454814	-0.422005694	-0.609142142	-0.838367593	-0.968692937	-0.976870344	-0.911775963	-0.853516792	-0.841844978	-0.847250934	-0.842096664	-0.851888929
0.097967609	0.194992693	0.290141792	0.382499497	0.471177254	0.555321913	0.634123934	0.706825181	0.77272621	0.831193	0.881663054	0.923650812	0.956752317	0.980649106	0.995111274	0.999999683	0.995267302	0.980959662	0.957214412	0.924260001	0.882413476	0.832077435	0.773736149	0.707950909	0.635354619	0.556645715	0.472581438	0.383970553	0.291665567	0.196554527	0.099552477	0.001592653	-0.096382494	-0.193430364	-0.288617281	-0.381027471	-0.469771875	-0.553996702	-0.632891641	-0.705697661	-0.77171431	-0.830306456	-0.880910396	-0.92303928	-0.956287795	-0.980336063	-0.994952721	-0.999997146	-0.995420806	-0.981267729
0.072283053	0.26239897	0.499425179	0.693116371	0.766764307	0.690250978	0.518326156	0.460696896	0.657583126	0.894122502	1.02933428	1.040463246	0.978616884	0.924640042	0.916032013	0.922122425	0.916141032	0.92414981	0.97747615	1.039830059	1.03045007	0.897311419	0.661706667	0.462185819	0.515654501	0.687910733	0.766713012	0.695431273	0.503159052	0.266106417	0.074570528	1.97E-05	-0.070027638	-0.258704329	-0.49567959	-0.690768818	-0.766774308	-0.69256261	-0.521025347	-0.459289601	-0.653465569	-0.890904518	-1.028184163	-1.041076406	-0.979760765	-0.92514417	-0.915926638	-0.922117748	-0.91625347	-0.923673443
0.097967609	0.194992693	0.290141792	0.382499497	0.471177254	0.555321913	0.634123934	0.706825181	0.77272621	0.831193	0.881663054	0.923650812	0.956752317	0.980649106	0.995111274	0.999999683	0.995267302	0.980959662	0.957214412	0.924260001	0.882413476	0.832077435	0.773736149	0.707950909	0.635354619	0.556645715	0.472581438	0.383970553	0.291665567	0.196554527	0.099552477	0.001592653	-0.096382494	-0.193430364	-0.288617281	-0.381027471	-0.469771875	-0.553996702	-0.632891641	-0.705697661	-0.77171431	-0.830306456	-0.880910396	-0.92303928	-0.956287795	-0.980336063	-0.994952721	-0.999997146	-0.995420806	-0.981267729
0.098066754	0.195389113	0.291030451	0.384068297	0.473603193	0.558767365	0.638733101	0.712720771	0.780006409	0.83992877	0.891895817	0.935390555	0.969976159	0.995300356	1.011099002	1.017198824	1.013519303	1.000073673	0.976969021	0.944405492	0.902674598	0.852156649	0.793317321	0.726703402	0.652937746	0.572713483	0.486787539	0.395973526	0.301134069	0.203172637	0.103024966	0.001650139	-0.099978577	-0.200883061	-0.300089736	-0.396638959	-0.489594294	-0.578051596	-0.661147809	-0.73806939	-0.808060284	-0.870429371	-0.9245573	-0.969902664	-1.006007426	-1.03250157	-1.049106906	-1.055640006	-1.052014231	-1.038240822
0.204191706	0.388335421	0.536346563	0.639196002	0.696454275	0.71595834	0.711692995	0.700381524	0.697571893	0.714118083	0.753862718	0.813045416	0.881554355	0.945700119	0.991824812	1.009854878	0.995915551	0.953350166	0.891877444	0.825081296	0.766847474	0.727634443	0.711521421	0.714797635	0.726484775	0.730710355	0.710390681	0.651353013	0.545909798	0.395022769	0.208530001	0.003370991	-0.199780799	-0.38069748	-0.523628538	-0.620276672	-0.671073876	-0.684522365	-0.674815815	-0.658342121	-0.649901727	-0.659507556	-0.690464868	-0.739109146	-0.796187041	-0.849491364	-0.887089087	-0.900367449	-0.886186455	-0.847646335
0.098159859	0.195757843	0.291849015	0.385499035	0.475793265	0.561845728	0.642807838	0.717876804	0.786303634	0.847400656	0.900548471	0.945202284	0.980897527	1.007254736	1.023983611	1.030886225	1.02785935	1.014895859	0.992085195	0.9596129	0.917759193	0.866896618	0.807486771	0.740076137	0.665291084	0.583832037	0.496466908	0.404023834	0.307383284	0.207469631	0.105242247	0.001686226	-0.102197192	-0.205400379	-0.306919194	-0.405762842	-0.500963651	-0.591586649	-0.676738846	-0.755578148	-0.82732178	-0.89125416	-0.94673413	-0.993201475	-1.030182659	-1.057295715	-1.074254254	-1.080870522	-1.077057502	-1.062830016
0.260983493	0.470913918	0.597535869	0.63843634	0.619932487	0.584615545	0.57315095	0.608201546	0.687135319	0.78610119	0.872973412	0.922861644	0.929030008	0.904476648	0.873925366	0.860469877	0.873521586	0.903956337	0.92881913	0.923300109	0.874124661	0.787692678	0.688666042	0.60917359	0.573320827	0.584146702	0.619370735	0.638507751	0.598847355	0.47368366	0.26491972	0.004385218	-0.257033379	-0.468121536	-0.596201135	-0.638348905	-0.620489859	-0.585091095	-0.572993919	-0.607241556	-0.685610063	-0.784506342	-0.871811992	-0.922411198	-0.929232519	-0.904995419	-0.874333973	-0.860477297	-0.873122711	-0.903434603
0.097967609	0.194992693	0.290141792	0.382499497	0.471177254	0.555321913	0.634123934	0.706825181	0.77272621	0.831193	0.881663054	0.923650812	0.956752317	0.980649106	0.995111274	0.999999683	0.995267302	0.980959662	0.957214412	0.924260001	0.882413476	0.832077435	0.773736149	0.707950909	0.909042119	0.556645715	0.472581438	0.383970553	0.291665567	0.196554527	0.099552477	0.001592653	-0.096382494	-0.193430364	-0.288617281	-0.381027471	-0.469771875	-0.553996702	-0.632891641	-0.705697661	-0.77171431	-0.830306456	-0.880910396	-0.92303928	-0.956287795	-0.980336063	-0.994952721	-0.999997146	-0.995420806	-0.981267729
0.028019442	0.104580228	0.209640004	0.317140159	0.403422792	0.454715576	0.471182634	0.466199894	0.461124649	0.477348427	0.528338215	0.614375003	0.72178922	0.826976241	0.903862377	0.932325854	0.904750956	0.828516877	0.723586111	0.616001619	0.529474071	0.477878275	0.461167028	0.46605581	0.471222105	0.455240689	0.404553875	0.318763855	0.211437174	0.106124674	0.02891455	7.55E-06	-0.027137409	-0.103043428	-0.207843421	-0.315510645	-0.402282171	-0.454180985	-0.471137328	-0.466343952	-0.461088065	-0.476828041	-0.527211913	-0.612754248	-0.719991799	-0.825428012	-0.902960755	-0.932310747	-0.905626427	-0.830049815
0.098155857	0.195745379	0.291829098	0.385478192	0.475783407	0.561863826	0.642875402	0.718019195	0.786549194	0.84777969	0.901092099	0.945941173	0.981860552	1.008467575	1.025467326	1.032655855	1.029922549	1.017251616	0.994722675	0.962510436	0.920883462	0.87020203	0.810915107	0.743556447	0.66873987	0.58715374	0.499554698	0.406760713	0.309643502	0.209120395	0.106145725	0.001701802	-0.103210412	-0.20758087	-0.31040014	-0.410669151	-0.50740889	-0.599669959	-0.686541897	-0.767162171	-0.840724757	-0.906488216	-0.963783189	-1.012019234	-1.050690932	-1.079383207	-1.097775787	-1.105646774	-1.10287528	-1.089443083
0.097967609	0.194992693	0.290141792	0.382499497	0.471177254	0.555321913	0.634123934	0.706825181	0.77272621	0.831193	0.881663054	0.923650812	0.956752317	0.980649106	0.995111274	0.999999683	0.995267302	0.980959662	0.957214412	0.924260001	0.882413476	0.832077435	0.773736149	0.707950909	0.635354619	0.556645715	0.472581438	0.383970553	0.291665567	0.196554527	0.099552477	0.001592653	-0.096382494	-0.193430364	-0.288617281	-0.381027471	-0.469771875	-0.553996702	-0.632891641	-0.705697661	-0.77171431	-0.830306456	-0.880910396	-0.92303928	-0.956287795	-0.980336063	-0.994952721	-0.999997146	-0.995420806	-0.981267729
0.098073598	0.195416477	0.291091794	0.384176589	0.473770652	0.559005199	0.639051264	0.713127735	0.78050895	0.840531787	0.892602169	0.936200931	0.970888981	0.99631171	1.012202611	1.018386054	1.014779211	1.001393084	0.978332651	0.945796105	0.904073193	0.853542687	0.79466898	0.727997858	0.654151483	0.573822617	0.487768165	0.396802074	0.301787665	0.203629475	0.103264666	0.001654107	-0.10022681	-0.201397509	-0.300881662	-0.397716596	-0.490962605	-0.579712069	-0.66309829	-0.740303962	-0.810569192	-0.873198995	-0.92757018	-0.973137573	-1.009439497	-1.036102476	-1.052845087	-1.059480949	-1.055920789	-1.042173589
0.215820525	0.409444973	0.563083948	0.666792518	0.720186909	0.732073558	0.718092942	0.696928082	0.685951983	0.697314313	0.735363641	0.795988417	0.868007321	0.93625221	0.985579802	1.004820842	0.989686019	0.943898419	0.878255841	0.807839285	0.748050767	0.710467084	0.699558067	0.711118805	0.732851695	0.747006795	0.734478567	0.679391163	0.573074618	0.416473215	0.220400093	0.003565816	-0.211163877	-0.401413452	-0.549778907	-0.64713523	-0.694054221	-0.700070926	-0.681038286	-0.655238463	-0.639178206	-0.644031148	-0.673503454	-0.723543202	-0.783876752	-0.840939545	-0.881466248	-0.895878579	-0.880679412	-0.83930671
0.097967609	0.194992693	0.290141792	0.382499497	0.471177254	0.555321913	0.634123934	0.706825181	0.77272621	0.831193	0.881663054	0.923650812	0.956752317	0.980649106	0.995111274	0.999999683	0.995267302	0.980959662	0.957214412	0.924260001	0.882413476	0.832077435	0.773736149	0.707950909	0.635354619	0.556645715	0.472581438	0.383970553	0.291665567	0.196554527	0.099552477	0.001592653	-0.096382494	-0.193430364	-0.288617281	-0.381027471	-0.469771875	-0.553996702	-0.632891641	-0.705697661	-0.77171431	-0.830306456	-0.880910396	-0.92303928	-0.956287795	-0.980336063	-0.994952721	-0.999997146	-0.995420806	-0.981267729
0.097967609	0.194992693	0.290141792	0.382499497	0.471177254	0.555321913	0.634123934	0.706825181	0.77272621	0.831193	0.881663054	0.923650812	0.956752317	0.980649106	0.995111274	0.999999683	0.995267302	0.980959662	0.957214412	0.924260001	0.882413476	0.832077435	0.773736149	0.707950909	0.303379619	0.556645715	0.472581438	0.383970553	0.291665567	0.196554527	0.099552477	0.001592653	-0.096382494	-0.193430364	-0.288617281	-0.381027471	-0.469771875	-0.553996702	-0.632891641	-0.705697661	-0.77171431	-0.830306456	-0.880910396	-0.92303928	-0.956287795	-0.980336063	-0.994952721	-0.999997146	-0.995420806	-0.981267729
0.097967609	0.194992693	0.290141792	0.382499497	0.471177254	0.555321913	0.634123934	0.706825181	0.77272621	0.831193	0.881663054	0.923650812	0.956752317	0.980649106	0.995111274	0.999999683	0.995267302	0.980959662	0.957214412	0.924260001	0.882413476	0.832077435	0.773736149	0.707950909	0.635354619	0.556645715	0.472581438	0.383970553	0.291665567	0.196554527	0.099552477	0.001592653	-0.096382494	-0.193430364	-0.288617281	-0.381027471	-0.469771875	-0.553996702	-0.632891641	-0.705697661	-0.77171431	-0.830306456	-0.880910396	-0.92303928	-0.956287795	-0.980336063	-0.994952721	-0.999997146	-0.995420806	-0.981267729
0.097967609	0.194992693	0.290141792	0.382499497	0.471177254	0.555321913	0.634123934	0.706825181	0.77272621	0.831193	0.881663054	0.923650812	0.956752317	0.980649106	0.995111274	0.999999683	0.995267302	0.980959662	0.957214412	0.924260001	0.882413476	0.832077435	0.773736149	0.707950909	0.635354619	0.556645715	0.472581438	0.383970553	0.291665567	0.196554527	0.099552477	0.001592653	-0.096382494	-0.193430364	-0.288617281	-0.381027471	-0.469771875	-0.553996702	-0.632891641	-0.705697661	-0.77171431	-0.830306456	-0.880910396	-0.92303928	-0.956287795	-0.980336063	-0.994952721	-0.999997146	-0.995420806	-0.981267729
0.097967609	0.194992693	0.290141792	0.382499497	0.471177254	0.555321913	0.634123934	0.706825181	0.77272621	0.831193	0.881663054	0.923650812	0.956752317	0.980649106	0.995111274	0.999999683	0.995267302	0.980959662	0.957214412	0.924260001	0.882413476	0.832077435	0.773736149	0.707950909	0.512517119	0.556645715	0.472581438	0.383970553	0.291665567	0.196554527	0.099552477	0.001592653	-0.096382494	-0.193430364	-0.288617281	-0.381027471	-0.469771875	-0.553996702	-0.632891641	-0.705697661	-0.77171431	-0.830306456	-0.880910396	-0.92303928	-0.956287795	-0.980336063	-0.994952721	-0.999997146	-0.995420806	-0.981267729
0.194688809	0.371078149	0.514471207	0.616584491	0.676951683	0.702621066	0.706230297	0.702908068	0.706717351	0.727457937	0.768560955	0.826552058	0.892190035	0.952989098	0.996500359	1.013542089	1.000576965	0.960639283	0.902569545	0.83873319	0.781781859	0.741263689	0.720939777	0.717501226	0.721043097	0.717220495	0.690594792	0.628378895	0.523684348	0.377486651	0.198829901	0.003211803	-0.190478756	-0.363762118	-0.502233818	-0.598270525	-0.65219077	-0.671656498	-0.669511261	-0.660601539	-0.658339297	-0.671792972	-0.703941658	-0.751436203	-0.805853661	-0.856091547	-0.891301123	-0.903655399	-0.890305005	-0.85407528
0.097967609	0.194992693	0.290141792	0.382499497	0.471177254	0.555321913	0.634123934	0.706825181	0.77272621	0.831193	0.881663054	0.923650812	0.956752317	0.980649106	0.995111274	0.999999683	0.995267302	0.980959662	0.957214412	0.924260001	0.882413476	0.832077435	0.773736149	0.707950909	0.635354619	0.556645715	0.472581438	0.383970553	0.291665567	0.196554527	0.099552477	0.001592653	-0.096382494	-0.193430364	-0.288617281	-0.381027471	-0.469771875	-0.553996702	-0.632891641	-0.705697661	-0.77171431	-0.830306456	-0.880910396	-0.92303928	-0.956287795	-0.980336063	-0.994952721	-0.999997146	-0.995420806	-0.981267729
0.097967609	0.194992693	0.290141792	0.382499497	0.471177254	0.555321913	0.634123934	0.706825181	0.77272621	0.831193	0.881663054	0.923650812	0.956752317	0.980649106	0.995111274	0.999999683	0.995267302	0.980959662	0.957214412	0.924260001	0.882413476	0.832077435	0.773736149	0.707950909	0.635354619	0.556645715	0.472581438	0.383970553	0.291665567	0.196554527	0.099552477	0.001592653	-0.096382494	-0.193430364	-0.288617281	-0.381027471	-0.469771875	-0.553996702	-0.632891641	-0.705697661	-0.77171431	-0.830306456	-0.880910396	-0.92303928	-0.956287795	-0.980336063	-0.994952721	-0.999997146	-0.995420806	-0.981267729
0.212566121	0.389094108	0.506712191	0.563452097	0.577472849	0.578340635	0.594286316	0.640949554	0.716274413	0.803365594	0.879554986	0.927264682	0.941654794	0.931730761	0.914736196	0.906800811	0.914500906	0.931460879	0.941647705	0.927757065	0.880589484	0.804749154	0.717653602	0.641972738	0.594779691	0.578415057	0.577506663	0.563949647	0.508094178	0.391508859	0.215804745	0.003555412	-0.209317697	-0.386663351	-0.5053137	-0.562943031	-0.577435603	-0.578270481	-0.593801447	-0.639934265	-0.714898456	-0.801979041	-0.878512685	-0.926763197	-0.941655285	-0.931998808	-0.914974098	-0.906805235	-0.914268283	-0.931189244
0.097967609	0.194992693	0.290141792	0.382499497	0.471177254	0.555321913	0.634123934	0.706825181	0.77272621	0.831193	0.881663054	0.923650812	0.956752317	0.980649106	0.995111274	0.999999683	0.995267302	0.980959662	0.957214412	0.924260001	0.882413476	0.832077435	0.773736149	0.707950909	0.635354619	0.556645715	0.472581438	0.383970553	0.291665567	0.196554527	0.099552477	0.001592653	-0.096382494	-0.193430364	-0.288617281	-0.381027471	-0.469771875	-0.553996702	-0.632891641	-0.705697661	-0.77171431	-0.830306456	-0.880910396	-0.92303928	-0.956287795	-0.980336063	-0.994952721	-0.999997146	-0.995420806	-0.981267729
0.097967609	0.194992693	0.290141792	0.382499497	0.471177254	0.555321913	0.634123934	0.706825181	0.77272621	0.831193	0.881663054	0.923650812	0.956752317	0.980649106	0.995111274	0.999999683	0.995267302	0.980959662	0.957214412	0.924260001	0.882413476	0.832077435	0.773736149	0.707950909	0.635354619	0.556645715	0.472581438	0.383970553	0.291665567	0.196554527	0.099552477	0.001592653	-0.096382494	-0.193430364	-0.288617281	-0.381027471	-0.469771875	-0.553996702	-0.632891641	-0.705697661	-0.77171431	-0.830306456	-0.880910396	-0.92303928	-0.956287795	-0.980336063	-0.994952721	-0.999997146	-0.995420806	-0.981267729
0.097967609	0.194992693	0.290141792	0.382499497	0.471177254	0.555321913	0.634123934	0.706825181	0.77272621	0.831193	0.881663054	0.923650812	0.956752317	0.980649106	0.995111274	0.999999683	0.995267302	0.980959662	0.957214412	0.924260001	0.882413476	0.832077435	0.773736149	0.707950909	0.635354619	0.556645715	0.472581438	0.383970553	0.291665567	0.196554527	0.099552477	0.001592653	-0.096382494	-0.193430364	-0.288617281	-0.381027471	-0.469771875	-0.553996702	-0.632891641	-0.705697661	-0.77171431	-0.830306456	-0.880910396	-0.92303928	-0.956287795	-0.980336063	-0.994952721	-0.999997146	-0.995420806	-0.981267729
0.098071051	0.195406294	0.291068966	0.38413629	0.473708335	0.558916693	0.638932865	0.71297629	0.780321938	0.840307384	0.892339312	0.935899363	0.970549289	0.995935351	1.011791921	1.017944245	1.014310356	1.000902086	0.977825198	0.94527861	0.903552728	0.853026895	0.794165982	0.727516147	0.65369981	0.573409871	0.487403241	0.396493743	0.30154444	0.20345947	0.103175466	0.00165263	-0.100134434	-0.201206065	-0.300586959	-0.39731557	-0.49045341	-0.579094151	-0.66237245	-0.739472401	-0.809635542	-0.872168323	-0.926448985	-0.971933753	-1.008162307	-1.034762456	-1.051453983	-1.058051603	-1.054467026	-1.040710072
0.046507042	0.17066567	0.331549964	0.476417665	0.55841505	0.552279938	0.462758041	0.322902053	0.182830216	0.092733925	0.085860697	0.167207068	0.311733143	0.472703975	0.597352433	0.644592288	0.598819101	0.475153077	0.314358896	0.169152744	0.086506058	0.091902731	0.180847994	0.320484733	0.460769017	0.551437446	0.559048451	0.478354791	0.33417351	0.173119718	0.047984216	1.26E-05	-0.045050912	-0.168221569	-0.328922063	-0.47446348	-0.557757741	-0.553099812	-0.464733411	-0.325319314	-0.184825992	-0.093587693	-0.085239268	-0.165278534	-0.309111862	-0.470245035	-0.595864786	-0.644567078	-0.60026466	-0.477592123
0.177342779	0.339562281	0.474482729	0.575175511	0.64110811	0.677897242	0.695734773	0.706854187	0.722622274	0.750924971	0.794446695	0.850233111	0.910624589	0.965321629	1.004071331	1.019311842	1.008118802	0.972965316	0.921096907	0.86266601	0.808082718	0.765241552	0.737325356	0.721754446	0.710572495	0.692208029	0.654209118	0.586304183	0.483055031	0.34546118	0.181123819	0.002921273	-0.173499437	-0.332834481	-0.463124775	-0.557971755	-0.617488617	-0.647811948	-0.659333934	-0.664102207	-0.673007548	-0.693403452	-0.727676914	-0.773051688	-0.822613016	-0.867264709	-0.898127202	-0.908800508	-0.896963008	-0.864940748
0.097967609	0.194992693	0.290141792	0.382499497	0.471177254	0.555321913	0.634123934	0.706825181	0.77272621	0.831193	0.881663054	0.923650812	0.956752317	0.980649106	0.995111274	0.999999683	0.995267302	0.980959662	0.957214412	0.924260001	0.882413476	0.832077435	0.773736149	0.707950909	1.070104619	0.556645715	0.472581438	0.383970553	0.291665567	0.196554527	0.099552477	0.001592653	-0.096382494	-0.193430364	-0.288617281	-0.381027471	-0.469771875	-0.553996702	-0.632891641	-0.705697661	-0.77171431	-0.830306456	-0.880910396	-0.92303928	-0.956287795	-0.980336063	-0.994952721	-0.999997146	-0.995420806	-0.981267729
0.098159859	0.195757843	0.291849015	0.385499035	0.475793265	0.561845728	0.642807838	0.717876804	0.786303634	0.847400656	0.900548471	0.945202284	0.980897527	1.007254736	1.023983611	1.030886225	1.02785935	1.014895859	0.992085195	0.9596129	0.917759193	0.866896618	0.807486771	0.740076137	0.665291084	0.583832037	0.496466908	0.404023834	0.307383284	0.207469631	0.105242247	0.001686226	-0.102197192	-0.205400379	-0.306919194	-0.405762842	-0.500963651	-0.591586649	-0.676738846	-0.755578148	-0.82732178	-0.89125416	-0.94673413	-0.993201475	-1.030182659	-1.057295715	-1.074254254	-1.080870522	-1.077057502	-1.062830016
0.097967609	0.194992693	0.290141792	0.382499497	0.471177254	0.555321913	0.634123934	0.706825181	0.77272621	0.831193	0.881663054	0.923650812	0.956752317	0.980649106	0.995111274	0.999999683	0.995267302	0.980959662	0.957214412	0.924260001	0.882413476	0.832077435	0.773736149	0.707950909	0.635354619	0.556645715	0.472581438	0.383970553	0.291665567	0.196554527	0.099552477	0.001592653	-0.096382494	-0.193430364	-0.288617281	-0.381027471	-0.469771875	-0.553996702	-0.632891641	-0.705697661	-0.77171431	-0.830306456	-0.880910396	-0.92303928	-0.956287795	-0.980336063	-0.994952721	-0.999997146	-0.995420806	-0.981267729
0.097967609	0.194992693	0.290141792	0.382499497	0.471177254	0.555321913	0.634123934	0.706825181	0.77272621	0.831193	0.881663054	0.923650812	0.956752317	0.980649106	0.995111274	0.999999683	0.995267302	0.980959662	0.957214412	0.924260001	0.882413476	0.832077435	0.773736149	0.707950909	0.943467119	0.556645715	0.472581438	0.383970553	0.291665567	0.196554527	0.099552477	0.001592653	-0.096382494	-0.193430364	-0.288617281	-0.381027471	-0.469771875	-0.553996702	-0.632891641	-0.705697661	-0.77171431	-0.830306456	-0.880910396	-0.92303928	-0.956287795	-0.980336063	-0.994952721	-0.999997146	-0.995420806	-0.981267729
0.098159859	0.195757843	0.291849015	0.385499035	0.475793265	0.561845728	0.642807838	0.717876804	0.786303634	0.847400656	0.900548471	0.945202284	0.980897527	1.007254736	1.023983611	1.030886225	1.02785935	1.014895859	0.992085195	0.9596129	0.917759193	0.866896618	0.807486771	0.740076137	0.665291084	0.583832037	0.496466908	0.404023834	0.307383284	0.207469631	0.105242247	0.001686226	-0.102197192	-0.205400379	-0.306919194	-0.405762842	-0.500963651	-0.591586649	-0.676738846	-0.755578148	-0.82732178	-0.89125416	-0.94673413	-0.993201475	-1.030182659	-1.057295715	-1.074254254	-1.080870522	-1.077057502	-1.062830016
0.098159859	0.195757843	0.291849015	0.385499035	0.475793265	0.561845728	0.642807838	0.717876804	0.786303634	0.847400656	0.900548471	0.945202284	0.980897527	1.007254736	1.023983611	1.030886225	1.02785935	1.014895859	0.992085195	0.9596129	0.917759193	0.866896618	0.807486771	0.740076137	0.665291084	0.583832037	0.496466908	0.404023834	0.307383284	0.207469631	0.105242247	0.001686226	-0.102197192	-0.205400379	-0.306919194	-0.405762842	-0.500963651	-0.591586649	-0.676738846	-0.755578148	-0.82732178	-0.89125416	-0.94673413	-0.993201475	-1.030182659	-1.057295715	-1.074254254	-1.080870522	-1.077057502	-1.062830016
0.098159859	0.195757843	0.291849015	0.385499035	0.475793265	0.561845728	0.642807838	0.717876804	0.786303634	0.847400656	0.900548471	0.945202284	0.980897527	1.007254736	1.023983611	1.030886225	1.02785935	1.014895859	0.992085195	0.9596129	0.917759193	0.866896618	0.807486771	0.740076137	0.665291084	0.583832037	0.496466908	0.404023834	0.307383284	0.207469631	0.105242247	0.001686226	-0.102197192	-0.205400379	-0.306919194	-0.405762842	-0.500963651	-0.591586649	-0.676738846	-0.755578148	-0.82732178	-0.89125416	-0.94673413	-0.993201475	-1.030182659	-1.057295715	-1.074254254	-1.080870522	-1.077057502	-1.062830016
0.097967609	0.194992693	0.290141792	0.382499497	0.471177254	0.555321913	0.634123934	0.706825181	0.77272621	0.831193	0.881663054	0.923650812	0.956752317	0.980649106	0.995111274	0.999999683	0.995267302	0.980959662	0.957214412	0.924260001	0.882413476	0.832077435	0.773736149	0.707950909	0.635354619	0.556645715	0.472581438	0.383970553	0.291665567	0.196554527	0.099552477	0.001592653	-0.096382494	-0.193430364	-0.288617281	-0.381027471	-0.469771875	-0.553996702	-0.632891641	-0.705697661	-0.77171431	-0.830306456	-0.880910396	-0.92303928	-0.956287795	-0.980336063	-0.994952721	-0.999997146	-0.995420806	-0.981267729
0.19069818	0.363829357	0.505278081	0.607073263	0.668733234	0.696976018	0.703875099	0.703891342	0.710465804	0.732956792	0.774623147	0.832110396	0.896542045	0.955936499	0.998351313	1.014978334	1.002421595	0.963585955	0.906944059	0.844350964	0.787941358	0.746882037	0.72480079	0.718556973	0.718695156	0.711510188	0.68225239	0.618714945	0.514343995	0.370120689	0.194756449	0.003144958	-0.186572483	-0.356648582	-0.493242777	-0.589014121	-0.644233709	-0.666211606	-0.66722592	-0.661477557	-0.661796956	-0.676856985	-0.70950015	-0.756509413	-0.80980966	-0.858761128	-0.892969243	-0.904936138	-0.891934166	-0.856673521
0.021325117	0.080448346	0.164357773	0.255998418	0.339585175	0.405339456	0.452076784	0.486801098	0.521473246	0.568075354	0.633667874	0.717138639	0.808772123	0.892814885	0.952200424	0.973864719	0.952879108	0.89401907	0.810244131	0.718597392	0.634895301	0.568979336	0.522106307	0.487329013	0.452708212	0.406240841	0.340810151	0.257456034	0.165830775	0.081655833	0.022008868	5.73E-06	-0.02065151	-0.079247481	-0.162886778	-0.254538542	-0.338355303	-0.404432872	-0.451442078	-0.486273169	-0.520843441	-0.567176562	-0.632445355	-0.715682175	-0.807298146	-0.891604113	-0.951511617	-0.97385326	-0.953547627	-0.895216598
0.097967609	0.194992693	0.290141792	0.382499497	0.471177254	0.555321913	0.634123934	0.706825181	0.77272621	0.831193	0.881663054	0.923650812	0.956752317	0.980649106	0.995111274	0.999999683	0.995267302	0.980959662	0.957214412	0.924260001	0.882413476	0.832077435	0.773736149	0.707950909	0.635354619	0.556645715	0.472581438	0.383970553	0.291665567	0.196554527	0.099552477	0.001592653	-0.096382494	-0.193430364	-0.288617281	-0.381027471	-0.469771875	-0.553996702	-0.632891641	-0.705697661	-0.77171431	-0.830306456	-0.880910396	-0.92303928	-0.956287795	-0.980336063	-0.994952721	-0.999997146	-0.995420806	-0.981267729
0.097967609	0.194992693	0.290141792	0.382499497	0.471177254	0.555321913	0.634123934	0.706825181	0.77272621	0.831193	0.881663054	0.923650812	0.956752317	0.980649106	0.995111274	0.999999683	0.995267302	0.980959662	0.957214412	0.924260001	0.882413476	0.832077435	0.773736149	0.707950909	0.635354619	0.556645715	0.472581438	0.383970553	0.291665567	0.196554527	0.099552477	0.001592653	-0.096382494	-0.193430364	-0.288617281	-0.381027471	-0.469771875	-0.553996702	-0.632891641	-0.705697661	-0.77171431	-0.830306456	-0.880910396	-0.92303928	-0.956287795	-0.980336063	-0.994952721	-0.999997146	-0.995420806	-0.981267729
0.098159859	0.195757843	0.291849015	0.385499035	0.475793265	0.561845728	0.642807838	0.717876804	0.786303634	0.847400656	0.900548471	0.945202284	0.980897527	1.007254736	1.023983611	1.030886225	1.02785935	1.014895859	0.992085195	0.9596129	0.917759193	0.866896618	0.807486771	0.740076137	0.665291084	0.583832037	0.496466908	0.404023834	0.307383284	0.207469631	0.105242247	0.001686226	-0.102197192	-0.205400379	-0.306919194	-0.405762842	-0.500963651	-0.591586649	-0.676738846	-0.755578148	-0.82732178	-0.89125416	-0.94673413	-0.993201475	-1.030182659	-1.057295715	-1.074254254	-1.080870522	-1.077057502	-1.062830016
0.098159859	0.195757843	0.291849015	0.385499035	0.475793265	0.561845728	0.642807838	0.717876804	0.786303634	0.847400656	0.900548471	0.945202284	0.980897527	1.007254736	1.023983611	1.030886225	1.02785935	1.014895859	0.992085195	0.9596129	0.917759193	0.866896618	0.807486771	0.740076137	0.665291084	0.583832037	0.496466908	0.404023834	0.307383284	0.207469631	0.105242247	0.001686226	-0.102197192	-0.205400379	-0.306919194	-0.405762842	-0.500963651	-0.591586649	-0.676738846	-0.755578148	-0.82732178	-0.89125416	-0.94673413	-0.993201475	-1.030182659	-1.057295715	-1.074254254	-1.080870522	-1.077057502	-1.062830016
0.097967609	0.194992693	0.290141792	0.382499497	0.471177254	0.555321913	0.634123934	0.706825181	0.77272621	0.831193	0.881663054	0.923650812	0.956752317	0.980649106	0.995111274	0.999999683	0.995267302	0.980959662	0.957214412	0.924260001	0.882413476	0.832077435	0.773736149	0.707950909	0.635354619	0.556645715	0.472581438	0.383970553	0.291665567	0.196554527	0.099552477	0.001592653	-0.096382494	-0.193430364	-0.288617281	-0.381027471	-0.469771875	-0.553996702	-0.632891641	-0.705697661	-0.77171431	-0.830306456	-0.880910396	-0.92303928	-0.956287795	-0.980336063	-0.994952721	-0.999997146	-0.995420806	-0.981267729
0.181072442	0.346340334	0.483087137	0.584093582	0.648841269	0.683253862	0.698047693	0.706077101	0.719287051	0.745973869	0.788982055	0.845245689	0.90676589	0.962774224	1.002546785	1.018174283	1.006600879	0.970420032	0.917219344	0.857625888	0.80253053	0.760182481	0.733888658	0.720913053	0.712881499	0.697627796	0.662059559	0.595365809	0.491797422	0.352348871	0.184930908	0.002983737	-0.177150242	-0.339485986	-0.471539865	-0.566650554	-0.624975211	-0.652977495	-0.661575269	-0.663416381	-0.66993228	-0.688844228	-0.722666181	-0.768499003	-0.819104465	-0.864956085	-0.896751969	-0.907786088	-0.895623639	-0.86269776
0.097967609	0.194992693	0.290141792	0.382499497	0.471177254	0.555321913	0.634123934	0.706825181	0.77272621	0.831193	0.881663054	0.923650812	0.956752317	0.980649106	0.995111274	0.999999683	0.995267302	0.980959662	0.957214412	0.924260001	0.882413476	0.832077435	0.773736149	0.707950909	0.635354619	0.556645715	0.472581438	0.383970553	0.291665567	0.196554527	0.099552477	0.001592653	-0.096382494	-0.193430364	-0.288617281	-0.381027471	-0.469771875	-0.553996702	-0.632891641	-0.705697661	-0.77171431	-0.830306456	-0.880910396	-0.92303928	-0.956287795	-0.980336063	-0.994952721	-0.999997146	-0.995420806	-0.981267729
0.097967609	0.194992693	0.290141792	0.382499497	0.471177254	0.555321913	0.634123934	0.706825181	0.77272621	0.831193	0.881663054	0.923650812	0.956752317	0.980649106	0.995111274	0.999999683	0.995267302	0.980959662	0.957214412	0.924260001	0.882413476	0.832077435	0.773736149	0.707950909	0.635354619	0.556645715	0.472581438	0.383970553	0.291665567	0.196554527	0.099552477	0.001592653	-0.096382494	-0.193430364	-0.288617281	-0.381027471	-0.469771875	-0.553996702	-0.632891641	-0.705697661	-0.77171431	-0.830306456	-0.880910396	-0.92303928	-0.956287795	-0.980336063	-0.994952721	-0.999997146	-0.995420806	-0.981267729
0.098159859	0.195757843	0.291849015	0.385499035	0.475793265	0.561845728	0.642807838	0.717876804	0.786303634	0.847400656	0.900548471	0.945202284	0.980897527	1.007254736	1.023983611	1.030886225	1.02785935	1.014895859	0.992085195	0.9596129	0.917759193	0.866896618	0.807486771	0.740076137	0.665291084	0.583832037	0.496466908	0.404023834	0.307383284	0.207469631	0.105242247	0.001686226	-0.102197192	-0.205400379	-0.306919194	-0.405762842	-0.500963651	-0.591586649	-0.676738846	-0.755578148	-0.82732178	-0.89125416	-0.94673413	-0.993201475	-1.030182659	-1.057295715	-1.074254254	-1.080870522	-1.077057502	-1.062830016
0.097967609	0.194992693	0.290141792	0.382499497	0.471177254	0.555321913	0.634123934	0.706825181	0.77272621	0.831193	0.881663054	0.923650812	0.956752317	0.980649106	0.995111274	0.999999683	0.995267302	0.980959662	0.957214412	0.924260001	0.882413476	0.832077435	0.773736149	0.707950909	0.635354619	0.556645715	0.472581438	0.383970553	0.291665567	0.196554527	0.099552477	0.001592653	-0.096382494	-0.193430364	-0.288617281	-0.381027471	-0.469771875	-0.553996702	-0.632891641	-0.705697661	-0.77171431	-0.830306456	-0.880910396	-0.92303928	-0.956287795	-0.980336063	-0.994952721	-0.999997146	-0.995420806	-0.981267729
0.193097251	0.356161681	0.47007494	0.5330476	0.559977324	0.575222688	0.602043013	0.65327031	0.727079776	0.809358335	0.881220479	0.928012985	0.945654585	0.94155444	0.92996518	0.924231856	0.929797096	0.941384361	0.945728482	0.92852626	0.882207468	0.810657777	0.728397261	0.654312711	0.602664402	0.575512904	0.560247759	0.533713944	0.471483449	0.358432765	0.196055176	0.003221837	-0.190131161	-0.353877246	-0.468652624	-0.532371542	-0.559703839	-0.574935767	-0.601428397	-0.652234144	-0.725764631	-0.808056048	-0.880226638	-0.92749176	-0.945574801	-0.941722568	-0.930134993	-0.924235085	-0.929630787	-0.941212399
0.098137727	0.19567289	0.291666599	0.385191324	0.475339804	0.561233795	0.642032577	0.716941136	0.785217947	0.84618228	0.899220951	0.943794461	0.979442459	1.005788469	1.022543833	1.029510846	1.026585015	1.013756456	0.991110377	0.958826661	0.917178543	0.866530375	0.807334522	0.740127393	0.665524645	0.584215611	0.496956991	0.404565867	0.307912105	0.207910218	0.10551075	0.00169129	-0.102552838	-0.206218081	-0.308302304	-0.407814457	-0.503784191	-0.595271316	-0.681375015	-0.761242724	-0.834078586	-0.899151399	-0.95580198	-1.003449864	-1.041599273	-1.069844299	-1.087873232	-1.095472003	-1.092526689	-1.079025067
0.097967609	0.194992693	0.290141792	0.382499497	0.471177254	0.555321913	0.634123934	0.706825181	0.77272621	0.831193	0.881663054	0.923650812	0.956752317	0.980649106	0.995111274	0.999999683	0.995267302	0.980959662	0.957214412	0.924260001	0.882413476	0.832077435	0.773736149	0.707950909	1.093542119	0.556645715	0.472581438	0.383970553	0.291665567	0.196554527	0.099552477	0.001592653	-0.096382494	-0.193430364	-0.288617281	-0.381027471	-0.469771875	-0.553996702	-0.632891641	-0.705697661	-0.77171431	-0.830306456	-0.880910396	-0.92303928	-0.956287795	-0.980336063	-0.994952721	-0.999997146	-0.995420806	-0.981267729
0.09815168	0.195728681	0.291791665	0.385412109	0.475681219	0.561718692	0.64268125	0.717770853	0.786242528	0.847411711	0.900661062	0.945446658	0.981303521	1.007850417	1.024793871	1.031931372	1.029153716	1.016446472	0.993890548	0.961661844	0.920029998	0.869356229	0.810090285	0.742766532	0.667999212	0.586476914	0.498956291	0.406255109	0.309244658	0.208841619	0.105999452	0.00169938	-0.103058934	-0.207266939	-0.309916884	-0.410011545	-0.506573906	-0.59865669	-0.685351657	-0.76579857	-0.839193749	-0.904798111	-0.961944642	-1.010045198	-1.048596582	-1.077185829	-1.095494639	-1.103302919	-1.100491383	-1.087043194
0.097967609	0.194992693	0.290141792	0.382499497	0.471177254	0.555321913	0.634123934	0.706825181	0.77272621	0.831193	0.881663054	0.923650812	0.956752317	0.980649106	0.995111274	0.999999683	0.995267302	0.980959662	0.957214412	0.924260001	0.882413476	0.832077435	0.773736149	0.707950909	0.635354619	0.556645715	0.472581438	0.383970553	0.291665567	0.196554527	0.099552477	0.001592653	-0.096382494	-0.193430364	-0.288617281	-0.381027471	-0.469771875	-0.553996702	-0.632891641	-0.705697661	-0.77171431	-0.830306456	-0.880910396	-0.92303928	-0.956287795	-0.980336063	-0.994952721	-0.999997146	-0.995420806	-0.981267729
0.097967609	0.194992693	0.290141792	0.382499497	0.471177254	0.555321913	0.634123934	0.706825181	0.77272621	0.831193	0.881663054	0.923650812	0.956752317	0.980649106	0.995111274	0.999999683	0.995267302	0.980959662	0.957214412	0.924260001	0.882413476	0.832077435	0.773736149	0.707950909	0.848592119	0.556645715	0.472581438	0.383970553	0.291665567	0.196554527	0.099552477	0.001592653	-0.096382494	-0.193430364	-0.288617281	-0.381027471	-0.469771875	-0.553996702	-0.632891641	-0.705697661	-0.77171431	-0.830306456	-0.880910396	-0.92303928	-0.956287795	-0.980336063	-0.994952721	-0.999997146	-0.995420806	-0.981267729
0.097967609	0.194992693	0.290141792	0.382499497	0.471177254	0.555321913	0.634123934	0.706825181	0.77272621	0.831193	0.881663054	0.923650812	0.956752317	0.980649106	0.995111274	0.999999683	0.995267302	0.980959662	0.957214412	0.924260001	0.882413476	0.832077435	0.773736149	0.707950909	0.635354619	0.556645715	0.472581438	0.383970553	0.291665567	0.196554527	0.099552477	0.001592653	-0.096382494	-0.193430364	-0.288617281	-0.381027471	-0.469771875	-0.553996702	-0.632891641	-0.705697661	-0.77171431	-0.830306456	-0.880910396	-0.92303928	-0.956287795	-0.980336063	-0.994952721	-0.999997146	-0.995420806	-0.981267729
0.069366002	0.251773841	0.479052325	0.664388894	0.733762553	0.657289689	0.484992357	0.419940813	0.60918279	0.836799236	0.964485423	0.970500959	0.904515896	0.846550246	0.835284227	0.840545288	0.83536588	0.846002561	0.903307888	0.969797862	0.96550077	0.839847372	0.613168745	0.421300051	0.482257184	0.654969022	0.733681861	0.666596892	0.482630366	0.255330292	0.071561063	1.89E-05	-0.067201698	-0.248229643	-0.47546295	-0.662149369	-0.733803191	-0.659581816	-0.487752366	-0.418664165	-0.605202218	-0.833722481	-0.963436446	-0.971184271	-0.905727022	-0.847112215	-0.835206713	-0.840541025	-0.835451446	-0.845469135
0.023465316	0.088171022	0.178877577	0.275676321	0.360285024	0.421654569	0.459019935	0.481393833	0.503702833	0.540898877	0.602062123	0.686513955	0.783280873	0.874119142	0.939107444	0.962945471	0.939853253	0.875431174	0.784857681	0.688028347	0.603263517	0.54168772	0.504152417	0.481712603	0.459467484	0.422440141	0.361483235	0.277189015	0.180455156	0.089486522	0.024216661	6.31E-06	-0.022725054	-0.086862478	-0.177301564	-0.274160249	-0.359080455	-0.420862449	-0.458568301	-0.481075046	-0.503257305	-0.540116572	-0.600867102	-0.685002975	-0.781702543	-0.872800194	-0.938350575	-0.962932847	-0.940587955	-0.876736209
0.191584442	0.353601943	0.467225345	0.530679119	0.558607954	0.574966472	0.602628351	0.654207823	0.727898031	0.809801746	0.881326904	0.928047175	0.945940152	0.942291171	0.931120849	0.925558221	0.930957975	0.942128826	0.946020319	0.928562056	0.882310188	0.81109464	0.729210704	0.655251685	0.603259639	0.575273394	0.558896708	0.53135852	0.468635873	0.355861841	0.19452055	0.003195919	-0.188640294	-0.351328899	-0.465801221	-0.529990145	-0.55831618	-0.574662769	-0.602003702	-0.653170067	-0.72658763	-0.808506018	-0.880336841	-0.927524434	-0.945854152	-0.942451556	-0.931285385	-0.925561358	-0.930796806	-0.941964589
0.097967609	0.194992693	0.290141792	0.382499497	0.471177254	0.555321913	0.634123934	0.706825181	0.77272621	0.831193	0.881663054	0.923650812	0.956752317	0.980649106	0.995111274	0.999999683	0.995267302	0.980959662	0.957214412	0.924260001	0.882413476	0.832077435	0.773736149	0.707950909	0.635354619	0.556645715	0.472581438	0.383970553	0.291665567	0.196554527	0.099552477	0.001592653	-0.096382494	-0.193430364	-0.288617281	-0.381027471	-0.469771875	-0.553996702	-0.632891641	-0.705697661	-0.77171431	-0.830306456	-0.880910396	-0.92303928	-0.956287795	-0.980336063	-0.994952721	-0.999997146	-0.995420806	-0.981267729
0.071678092	0.26019557	0.495200849	0.687161293	0.759927642	0.683435862	0.511481011	0.452412096	0.647682543	0.882350109	1.016010218	1.026113916	0.963472534	0.908739126	0.899615589	0.905539622	0.89971918	0.908237915	0.962319052	1.025467038	1.017105533	0.885509765	0.651776897	0.453874642	0.508797615	0.681100039	0.759870372	0.689454072	0.498902423	0.263871707	0.073946402	1.95E-05	-0.069441572	-0.256532125	-0.491487639	-0.684836096	-0.759943877	-0.685743094	-0.514191413	-0.451031312	-0.64359406	-0.879161485	-1.014880727	-1.026740825	-0.964629161	-0.909254303	-0.899515737	-0.905535029	-0.899826283	-0.90775064
0.097967609	0.194992693	0.290141792	0.382499497	0.471177254	0.555321913	0.634123934	0.706825181	0.77272621	0.831193	0.881663054	0.923650812	0.956752317	0.980649106	0.995111274	0.999999683	0.995267302	0.980959662	0.957214412	0.924260001	0.882413476	0.832077435	0.773736149	0.707950909	0.635354619	0.556645715	0.472581438	0.383970553	0.291665567	0.196554527	0.099552477	0.001592653	-0.096382494	-0.193430364	-0.288617281	-0.381027471	-0.469771875	-0.553996702	-0.632891641	-0.705697661	-0.77171431	-0.830306456	-0.880910396	-0.92303928	-0.956287795	-0.980336063	-0.994952721	-0.999997146	-0.995420806	-0.981267729
0.098159859	0.195757843	0.291849015	0.385499035	0.475793265	0.561845728	0.642807838	0.717876804	0.786303634	0.847400656	0.900548471	0.945202284	0.980897527	1.007254736	1.023983611	1.030886225	1.02785935	1.014895859	0.992085195	0.9596129	0.917759193	0.866896618	0.807486771	0.740076137	0.665291084	0.583832037	0.496466908	0.404023834	0.307383284	0.207469631	0.105242247	0.001686226	-0.102197192	-0.205400379	-0.306919194	-0.405762842	-0.500963651	-0.591586649	-0.676738846	-0.755578148	-0.82732178	-0.89125416	-0.94673413	-0.993201475	-1.030182659	-1.057295715	-1.074254254	-1.080870522	-1.077057502	-1.062830016
0.097967609	0.194992693	0.290141792	0.382499497	0.471177254	0.555321913	0.634123934	0.706825181	0.77272621	0.831193	0.881663054	0.923650812	0.956752317	0.980649106	0.995111274	0.999999683	0.995267302	0.980959662	0.957214412	0.924260001	0.882413476	0.832077435	0.773736149	0.707950909	0.635354619	0.556645715	0.472581438	0.383970553	0.291665567	0.196554527	0.099552477	0.001592653	-0.096382494	-0.193430364	-0.288617281	-0.381027471	-0.469771875	-0.553996702	-0.632891641	-0.705697661	-0.77171431	-0.830306456	-0.880910396	-0.92303928	-0.956287795	-0.980336063	-0.994952721	-0.999997146	-0.995420806	-0.981267729
0.097967609	0.194992693	0.290141792	0.382499497	0.471177254	0.555321913	0.634123934	0.706825181	0.77272621	0.831193	0.881663054	0.923650812	0.956752317	0.980649106	0.995111274	0.999999683	0.995267302	0.980959662	0.957214412	0.924260001	0.882413476	0.832077435	0.773736149	0.707950909	0.283354619	0.556645715	0.472581438	0.383970553	0.291665567	0.196554527	0.099552477	0.001592653	-0.096382494	-0.193430364	-0.288617281	-0.381027471	-0.469771875	-0.553996702	-0.632891641	-0.705697661	-0.77171431	-0.830306456	-0.880910396	-0.92303928	-0.956287795	-0.980336063	-0.994952721	-0.999997146	-0.995420806	-0.981267729
0.03441734	0.127567922	0.25249176	0.374279359	0.461552036	0.496658301	0.481167085	0.434825376	0.388350994	0.372508804	0.407170995	0.494067427	0.615688642	0.740730674	0.834265554	0.869227035	0.83535452	0.742590064	0.617786785	0.495834927	0.4081872	0.372636751	0.387775651	0.433982601	0.480587566	0.49677938	0.462561143	0.37604214	0.254589429	0.12943157	0.035514225	9.30E-06	-0.033336315	-0.125712826	-0.250393182	-0.372507169	-0.460528743	-0.496523474	-0.481738224	-0.435668115	-0.388934658	-0.372394579	-0.406168993	-0.492309393	-0.613591484	-0.738862803	-0.833160771	-0.869208437	-0.836427584	-0.744440829
0.097967609	0.194992693	0.290141792	0.382499497	0.471177254	0.555321913	0.634123934	0.706825181	0.77272621	0.831193	0.881663054	0.923650812	0.956752317	0.980649106	0.995111274	0.999999683	0.995267302	0.980959662	0.957214412	0.924260001	0.882413476	0.832077435	0.773736149	0.707950909	0.449817119	0.556645715	0.472581438	0.383970553	0.291665567	0.196554527	0.099552477	0.001592653	-0.096382494	-0.193430364	-0.288617281	-0.381027471	-0.469771875	-0.553996702	-0.632891641	-0.705697661	-0.77171431	-0.830306456	-0.880910396	-0.92303928	-0.956287795	-0.980336063	-0.994952721	-0.999997146	-0.995420806	-0.981267729
0.097967609	0.194992693	0.290141792	0.382499497	0.471177254	0.555321913	0.634123934	0.706825181	0.77272621	0.831193	0.881663054	0.923650812	0.956752317	0.980649106	0.995111274	0.999999683	0.995267302	0.980959662	0.957214412	0.924260001	0.882413476	0.832077435	0.773736149	0.707950909	0.635354619	0.556645715	0.472581438	0.383970553	0.291665567	0.196554527	0.099552477	0.001592653	-0.096382494	-0.193430364	-0.288617281	-0.381027471	-0.469771875	-0.553996702	-0.632891641	-0.705697661	-0.77171431	-0.830306456	-0.880910396	-0.92303928	-0.956287795	-0.980336063	-0.994952721	-0.999997146	-0.995420806	-0.981267729
0.025635105	0.095993345	0.193558035	0.295504203	0.380999437	0.437700651	0.465279009	0.474810278	0.484263586	0.511637633	0.56808682	0.653383143	0.755271993	0.85296645	0.923627728	0.949669533	0.924441571	0.854387557	0.756954177	0.6549521	0.569258791	0.512305566	0.484522143	0.47491169	0.465535118	0.438364621	0.382167473	0.297070886	0.195240761	0.097418084	0.026454958	6.90E-06	-0.024827286	-0.094575894	-0.191876418	-0.293932992	-0.379823538	-0.437028748	-0.465017986	-0.474708844	-0.484009907	-0.510977621	-0.566922725	-0.651818754	-0.753588752	-0.851538101	-0.92280188	-0.949655726	-0.925243352	-0.855801328
0.098159859	0.195757843	0.291849015	0.385499035	0.475793265	0.561845728	0.642807838	0.717876804	0.786303634	0.847400656	0.900548471	0.945202284	0.980897527	1.007254736	1.023983611	1.030886225	1.02785935	1.014895859	0.992085195	0.9596129	0.917759193	0.866896618	0.807486771	0.740076137	0.665291084	0.583832037	0.496466908	0.404023834	0.307383284	0.207469631	0.105242247	0.001686226	-0.102197192	-0.205400379	-0.306919194	-0.405762842	-0.500963651	-0.591586649	-0.676738846	-0.755578148	-0.82732178	-0.89125416	-0.94673413	-0.993201475	-1.030182659	-1.057295715	-1.074254254	-1.080870522	-1.077057502	-1.062830016
0.097967609	0.194992693	0.290141792	0.382499497	0.471177254	0.555321913	0.634123934	0.706825181	0.77272621	0.831193	0.881663054	0.923650812	0.956752317	0.980649106	0.995111274	0.999999683	0.995267302	0.980959662	0.957214412	0.924260001	0.882413476	0.832077435	0.773736149	0.707950909	0.635354619	0.556645715	0.472581438	0.383970553	0.291665567	0.196554527	0.099552477	0.001592653	-0.096382494	-0.193430364	-0.288617281	-0.381027471	-0.469771875	-0.553996702	-0.632891641	-0.705697661	-0.77171431	-0.830306456	-0.880910396	-0.92303928	-0.956287795	-0.980336063	-0.994952721	-0.999997146	-0.995420806	-0.981267729
0.097967609	0.194992693	0.290141792	0.382499497	0.471177254	0.555321913	0.634123934	0.706825181	0.77272621	0.831193	0.881663054	0.923650812	0.956752317	0.980649106	0.995111274	0.999999683	0.995267302	0.980959662	0.957214412	0.924260001	0.882413476	0.832077435	0.773736149	0.707950909	0.635354619	0.556645715	0.472581438	0.383970553	0.291665567	0.196554527	0.099552477	0.001592653	-0.096382494	-0.193430364	-0.288617281	-0.381027471	-0.469771875	-0.553996702	-0.632891641	-0.705697661	-0.77171431	-0.830306456	-0.880910396	-0.92303928	-0.956287795	-0.980336063	-0.994952721	-0.999997146	-0.995420806	-0.981267729
0.195976004	0.373416052	0.517435633	0.619650399	0.679598998	0.704436357	0.706982303	0.702581164	0.705496727	0.725671336	0.766591756	0.824744946	0.890771942	0.952024168	0.995889222	1.01306476	0.999967819	0.959674489	0.901144043	0.836906711	0.77978104	0.739438289	0.71968259	0.71715071	0.721792565	0.719056687	0.69328199	0.631494008	0.526696237	0.379862338	0.20014381	0.003233364	-0.191738743	-0.366056402	-0.505133093	-0.601254315	-0.654753929	-0.673407503	-0.670241166	-0.660309848	-0.657213281	-0.670147629	-0.702136088	-0.749786854	-0.804564674	-0.855217662	-0.89075044	-0.903229754	-0.889766926	-0.853224477
0.097967609	0.194992693	0.290141792	0.382499497	0.471177254	0.555321913	0.634123934	0.706825181	0.77272621	0.831193	0.881663054	0.923650812	0.956752317	0.980649106	0.995111274	0.999999683	0.995267302	0.980959662	0.957214412	0.924260001	0.882413476	0.832077435	0.773736149	0.707950909	0.635354619	0.556645715	0.472581438	0.383970553	0.291665567	0.196554527	0.099552477	0.001592653	-0.096382494	-0.193430364	-0.288617281	-0.381027471	-0.469771875	-0.553996702	-0.632891641	-0.705697661	-0.77171431	-0.830306456	-0.880910396	-0.92303928	-0.956287795	-0.980336063	-0.994952721	-0.999997146	-0.995420806	-0.981267729
0.098079307	0.195439305	0.291142967	0.384266927	0.473910349	0.559203604	0.639316681	0.71346723	0.780928178	0.841034833	0.893191419	0.93687696	0.971650471	0.997155397	1.013123258	1.01937646	1.015830245	1.002493757	0.979470213	0.946956175	0.905239922	0.854698941	0.795796554	0.729077714	0.655164001	0.574747873	0.488586218	0.39749326	0.302332905	0.204010576	0.103464628	0.001657417	-0.100433889	-0.20182667	-0.301542299	-0.398615577	-0.492104071	-0.581097261	-0.66472541	-0.742168075	-0.812662161	-0.875509457	-0.93008357	-0.975836182	-1.012302583	-1.039106406	-1.055963535	-1.062685121	-1.0591797	-1.045454362
0.098159859	0.195757843	0.291849015	0.385499035	0.475793265	0.561845728	0.642807838	0.717876804	0.786303634	0.847400656	0.900548471	0.945202284	0.980897527	1.007254736	1.023983611	1.030886225	1.02785935	1.014895859	0.992085195	0.9596129	0.917759193	0.866896618	0.807486771	0.740076137	0.665291084	0.583832037	0.496466908	0.404023834	0.307383284	0.207469631	0.105242247	0.001686226	-0.102197192	-0.205400379	-0.306919194	-0.405762842	-0.500963651	-0.591586649	-0.676738846	-0.755578148	-0.82732178	-0.89125416	-0.94673413	-0.993201475	-1.030182659	-1.057295715	-1.074254254	-1.080870522	-1.077057502	-1.062830016
0.098159859	0.195757843	0.291849015	0.385499035	0.475793265	0.561845728	0.642807838	0.717876804	0.786303634	0.847400656	0.900548471	0.945202284	0.980897527	1.007254736	1.023983611	1.030886225	1.02785935	1.014895859	0.992085195	0.9596129	0.917759193	0.866896618	0.807486771	0.740076137	0.665291084	0.583832037	0.496466908	0.404023834	0.307383284	0.207469631	0.105242247	0.001686226	-0.102197192	-0.205400379	-0.306919194	-0.405762842	-0.500963651	-0.591586649	-0.676738846	-0.755578148	-0.82732178	-0.89125416	-0.94673413	-0.993201475	-1.030182659	-1.057295715	-1.074254254	-1.080870522	-1.077057502	-1.062830016
0.097967609	0.194992693	0.290141792	0.382499497	0.471177254	0.555321913	0.634123934	0.706825181	0.77272621	0.831193	0.881663054	0.923650812	0.956752317	0.980649106	0.995111274	0.999999683	0.995267302	0.980959662	0.957214412	0.924260001	0.882413476	0.832077435	0.773736149	0.707950909	0.375642119	0.556645715	0.472581438	0.383970553	0.291665567	0.196554527	0.099552477	0.001592653	-0.096382494	-0.193430364	-0.288617281	-0.381027471	-0.469771875	-0.553996702	-0.632891641	-0.705697661	-0.77171431	-0.830306456	-0.880910396	-0.92303928	-0.956287795	-0.980336063	-0.994952721	-0.999997146	-0.995420806	-0.981267729
0.097967609	0.194992693	0.290141792	0.382499497	0.471177254	0.555321913	0.634123934	0.706825181	0.77272621	0.831193	0.881663054	0.923650812	0.956752317	0.980649106	0.995111274	0.999999683	0.995267302	0.980959662	0.957214412	0.924260001	0.882413476	0.832077435	0.773736149	0.707950909	0.635354619	0.556645715	0.472581438	0.383970553	0.291665567	0.196554527	0.099552477	0.001592653	-0.096382494	-0.193430364	-0.288617281	-0.381027471	-0.469771875	-0.553996702	-0.632891641	-0.705697661	-0.77171431	-0.830306456	-0.880910396	-0.92303928	-0.956287795	-0.980336063	-0.994952721	-0.999997146	-0.995420806	-0.981267729
0.097967609	0.194992693	0.290141792	0.382499497	0.471177254	0.555321913	0.634123934	0.706825181	0.77272621	0.831193	0.881663054	0.923650812	0.956752317	0.980649106	0.995111274	0.999999683	0.995267302	0.980959662	0.957214412	0.924260001	0.882413476	0.832077435	0.773736149	0.707950909	0.635354619	0.556645715	0.472581438	0.383970553	0.291665567	0.196554527	0.099552477	0.001592653	-0.096382494	-0.193430364	-0.288617281	-0.381027471	-0.469771875	-0.553996702	-0.632891641	-0.705697661	-0.77171431	-0.830306456	-0.880910396	-0.92303928	-0.956287795	-0.980336063	-0.994952721	-0.999997146	-0.995420806	-0.981267729
0.036389945	0.134636704	0.265598084	0.391574531	0.478757999	0.508285489	0.482187891	0.422246443	0.362159535	0.335676659	0.364715062	0.451480515	0.577264492	0.708340473	0.806989381	0.843954305	0.808140078	0.710297445	0.579453218	0.453286593	0.365686386	0.335669668	0.361380509	0.421174211	0.481404286	0.508270952	0.479721483	0.393375311	0.267786088	0.136598063	0.037548988	9.84E-06	-0.035247617	-0.132684159	-0.263408678	-0.389763187	-0.477778845	-0.508284919	-0.482962305	-0.423318635	-0.362947686	-0.335698729	-0.363759427	-0.449685062	-0.575077252	-0.706374764	-0.805822017	-0.84393463	-0.809274015	-0.712245524
0.097967609	0.194992693	0.290141792	0.382499497	0.471177254	0.555321913	0.634123934	0.706825181	0.77272621	0.831193	0.881663054	0.923650812	0.956752317	0.980649106	0.995111274	0.999999683	0.995267302	0.980959662	0.957214412	0.924260001	0.882413476	0.832077435	0.773736149	0.707950909	0.972304619	0.556645715	0.472581438	0.383970553	0.291665567	0.196554527	0.099552477	0.001592653	-0.096382494	-0.193430364	-0.288617281	-0.381027471	-0.469771875	-0.553996702	-0.632891641	-0.705697661	-0.77171431	-0.830306456	-0.880910396	-0.92303928	-0.956287795	-0.980336063	-0.994952721	-0.999997146	-0.995420806	-0.981267729
0.097967609	0.194992693	0.290141792	0.382499497	0.471177254	0.555321913	0.634123934	0.706825181	0.77272621	0.831193	0.881663054	0.923650812	0.956752317	0.980649106	0.995111274	0.999999683	0.995267302	0.980959662	0.957214412	0.924260001	0.882413476	0.832077435	0.773736149	0.707950909	0.954979619	0.556645715	0.472581438	0.383970553	0.291665567	0.196554527	0.099552477	0.001592653	-0.096382494	-0.193430364	-0.288617281	-0.381027471	-0.469771875	-0.553996702	-0.632891641	-0.705697661	-0.77171431	-0.830306456	-0.880910396	-0.92303928	-0.956287795	-0.980336063	-0.994952721	-0.999997146	-0.995420806	-0.981267729
0.097967609	0.194992693	0.290141792	0.382499497	0.471177254	0.555321913	0.634123934	0.706825181	0.77272621	0.831193	0.881663054	0.923650812	0.956752317	0.980649106	0.995111274	0.999999683	0.995267302	0.980959662	0.957214412	0.924260001	0.882413476	0.832077435	0.773736149	0.707950909	0.288979619	0.556645715	0.472581438	0.383970553	0.291665567	0.196554527	0.099552477	0.001592653	-0.096382494	-0.193430364	-0.288617281	-0.381027471	-0.469771875	-0.553996702	-0.632891641	-0.705697661	-0.77171431	-0.830306456	-0.880910396	-0.92303928	-0.956287795	-0.980336063	-0.994952721	-0.999997146	-0.995420806	-0.981267729
0.097967609	0.194992693	0.290141792	0.382499497	0.471177254	0.555321913	0.634123934	0.706825181	0.77272621	0.831193	0.881663054	0.923650812	0.956752317	0.980649106	0.995111274	0.999999683	0.995267302	0.980959662	0.957214412	0.924260001	0.882413476	0.832077435	0.773736149	0.707950909	0.635354619	0.556645715	0.472581438	0.383970553	0.291665567	0.196554527	0.099552477	0.001592653	-0.096382494	-0.193430364	-0.288617281	-0.381027471	-0.469771875	-0.553996702	-0.632891641	-0.705697661	-0.77171431	-0.830306456	-0.880910396	-0.92303928	-0.956287795	-0.980336063	-0.994952721	-0.999997146	-0.995420806	-0.981267729
0.097967609	0.194992693	0.290141792	0.382499497	0.471177254	0.555321913	0.634123934	0.706825181	0.77272621	0.831193	0.881663054	0.923650812	0.956752317	0.980649106	0.995111274	0.999999683	0.995267302	0.980959662	0.957214412	0.924260001	0.882413476	0.832077435	0.773736149	0.707950909	0.859467119	0.556645715	0.472581438	0.383970553	0.291665567	0.196554527	0.099552477	0.001592653	-0.096382494	-0.193430364	-0.288617281	-0.381027471	-0.469771875	-0.553996702	-0.632891641	-0.705697661	-0.77171431	-0.830306456	-0.880910396	-0.92303928	-0.956287795	-0.980336063	-0.994952721	-0.999997146	-0.995420806	-0.981267729
0.097967609	0.194992693	0.290141792	0.382499497	0.471177254	0.555321913	0.634123934	0.706825181	0.77272621	0.831193	0.881663054	0.923650812	0.956752317	0.980649106	0.995111274	0.999999683	0.995267302	0.980959662	0.957214412	0.924260001	0.882413476	0.832077435	0.773736149	0.707950909	0.635354619	0.556645715	0.472581438	0.383970553	0.291665567	0.196554527	0.099552477	0.001592653	-0.096382494	-0.193430364	-0.288617281	-0.381027471	-0.469771875	-0.553996702	-0.632891641	-0.705697661	-0.77171431	-0.830306456	-0.880910396	-0.92303928	-0.956287795	-0.980336063	-0.994952721	-0.999997146	-0.995420806	-0.981267729
0.200573436	0.368810111	0.484151647	0.544739938	0.566723767	0.57645949	0.599113645	0.648595311	0.722990963	0.80712011	0.880646048	0.927793496	0.944190121	0.937857454	0.924195567	0.917617804	0.924001712	0.93764911	0.944232982	0.928298801	0.881651318	0.808451887	0.724332194	0.649630422	0.599686012	0.576667016	0.566903528	0.545341634	0.485550093	0.371136425	0.203639164	0.003349926	-0.197498916	-0.366469427	-0.48273836	-0.544127837	-0.56654081	-0.576255632	-0.598548714	-0.647567072	-0.721652414	-0.80578543	-0.87963356	-0.927279799	-0.9441411	-0.938063892	-0.924391491	-0.917621492	-0.923809974	-0.937438932
0.097967609	0.194992693	0.290141792	0.382499497	0.471177254	0.555321913	0.634123934	0.706825181	0.77272621	0.831193	0.881663054	0.923650812	0.956752317	0.980649106	0.995111274	0.999999683	0.995267302	0.980959662	0.957214412	0.924260001	0.882413476	0.832077435	0.773736149	0.707950909	0.635354619	0.556645715	0.472581438	0.383970553	0.291665567	0.196554527	0.099552477	0.001592653	-0.096382494	-0.193430364	-0.288617281	-0.381027471	-0.469771875	-0.553996702	-0.632891641	-0.705697661	-0.77171431	-0.830306456	-0.880910396	-0.92303928	-0.956287795	-0.980336063	-0.994952721	-0.999997146	-0.995420806	-0.981267729
0.098159859	0.195757843	0.291849015	0.385499035	0.475793265	0.561845728	0.642807838	0.717876804	0.786303634	0.847400656	0.900548471	0.945202284	0.980897527	1.007254736	1.023983611	1.030886225	1.02785935	1.014895859	0.992085195	0.9596129	0.917759193	0.866896618	0.807486771	0.740076137	0.665291084	0.583832037	0.496466908	0.404023834	0.307383284	0.207469631	0.105242247	0.001686226	-0.102197192	-0.205400379	-0.306919194	-0.405762842	-0.500963651	-0.591586649	-0.676738846	-0.755578148	-0.82732178	-0.89125416	-0.94673413	-0.993201475	-1.030182659	-1.057295715	-1.074254254	-1.080870522	-1.077057502	-1.062830016
0.098159859	0.195757843	0.291849015	0.385499035	0.475793265	0.561845728	0.642807838	0.717876804	0.786303634	0.847400656	0.900548471	0.945202284	0.980897527	1.007254736	1.023983611	1.030886225	1.02785935	1.014895859	0.992085195	0.9596129	0.917759193	0.866896618	0.807486771	0.740076137	0.665291084	0.583832037	0.496466908	0.404023834	0.307383284	0.207469631	0.105242247	0.001686226	-0.102197192	-0.205400379	-0.306919194	-0.405762842	-0.500963651	-0.591586649	-0.676738846	-0.755578148	-0.82732178	-0.89125416	-0.94673413	-0.993201475	-1.030182659	-1.057295715	-1.074254254	-1.080870522	-1.077057502	-1.062830016
0.098159859	0.195757843	0.291849015	0.385499035	0.475793265	0.561845728	0.642807838	0.717876804	0.786303634	0.847400656	0.900548471	0.945202284	0.980897527	1.007254736	1.023983611	1.030886225	1.02785935	1.014895859	0.992085195	0.9596129	0.917759193	0.866896618	0.807486771	0.740076137	0.665291084	0.583832037	0.496466908	0.404023834	0.307383284	0.207469631	0.105242247	0.001686226	-0.102197192	-0.205400379	-0.306919194	-0.405762842	-0.500963651	-0.591586649	-0.676738846	-0.755578148	-0.82732178	-0.89125416	-0.94673413	-0.993201475	-1.030182659	-1.057295715	-1.074254254	-1.080870522	-1.077057502	-1.062830016
0.097967609	0.194992693	0.290141792	0.382499497	0.471177254	0.555321913	0.634123934	0.706825181	0.77272621	0.831193	0.881663054	0.923650812	0.956752317	0.980649106	0.995111274	0.999999683	0.995267302	0.980959662	0.957214412	0.924260001	0.882413476	0.832077435	0.773736149	0.707950909	0.635354619	0.556645715	0.472581438	0.383970553	0.291665567	0.196554527	0.099552477	0.001592653	-0.096382494	-0.193430364	-0.288617281	-0.381027471	-0.469771875	-0.553996702	-0.632891641	-0.705697661	-0.77171431	-0.830306456	-0.880910396	-0.92303928	-0.956287795	-0.980336063	-0.994952721	-0.999997146	-0.995420806	-0.981267729
0.098159859	0.195757843	0.291849015	0.385499035	0.475793265	0.561845728	0.642807838	0.717876804	0.786303634	0.847400656	0.900548471	0.945202284	0.980897527	1.007254736	1.023983611	1.030886225	1.02785935	1.014895859	0.992085195	0.9596129	0.917759193	0.866896618	0.807486771	0.740076137	0.665291084	0.583832037	0.496466908	0.404023834	0.307383284	0.207469631	0.105242247	0.001686226	-0.102197192	-0.205400379	-0.306919194	-0.405762842	-0.500963651	-0.591586649	-0.676738846	-0.755578148	-0.82732178	-0.89125416	-0.94673413	-0.993201475	-1.030182659	-1.057295715	-1.074254254	-1.080870522	-1.077057502	-1.062830016
0.097967609	0.194992693	0.290141792	0.382499497	0.471177254	0.555321913	0.634123934	0.706825181	0.77272621	0.831193	0.881663054	0.923650812	0.956752317	0.980649106	0.995111274	0.999999683	0.995267302	0.980959662	0.957214412	0.924260001	0.882413476	0.832077435	0.773736149	0.707950909	0.635354619	0.556645715	0.472581438	0.383970553	0.291665567	0.196554527	0.099552477	0.001592653	-0.096382494	-0.193430364	-0.288617281	-0.381027471	-0.469771875	-0.553996702	-0.632891641	-0.705697661	-0.77171431	-0.830306456	-0.880910396	-0.92303928	-0.956287795	-0.980336063	-0.994952721	-0.999997146	-0.995420806	-0.981267729
0.097967609	0.194992693	0.290141792	0.382499497	0.471177254	0.555321913	0.634123934	0.706825181	0.77272621	0.831193	0.881663054	0.923650812	0.956752317	0.980649106	0.995111274	0.999999683	0.995267302	0.980959662	0.957214412	0.924260001	0.882413476	0.832077435	0.773736149	0.707950909	0.635354619	0.556645715	0.472581438	0.383970553	0.291665567	0.196554527	0.099552477	0.001592653	-0.096382494	-0.193430364	-0.288617281	-0.381027471	-0.469771875	-0.553996702	-0.632891641	-0.705697661	-0.77171431	-0.830306456	-0.880910396	-0.92303928	-0.956287795	-0.980336063	-0.994952721	-0.999997146	-0.995420806	-0.981267729
0.097967609	0.194992693	0.290141792	0.382499497	0.471177254	0.555321913	0.634123934	0.706825181	0.77272621	0.831193	0.881663054	0.923650812	0.956752317	0.980649106	0.995111274	0.999999683	0.995267302	0.980959662	0.957214412	0.924260001	0.882413476	0.832077435	0.773736149	0.707950909	0.635354619	0.556645715	0.472581438	0.383970553	0.291665567	0.196554527	0.099552477	0.001592653	-0.096382494	-0.193430364	-0.288617281	-0.381027471	-0.469771875	-0.553996702	-0.632891641	-0.705697661	-0.77171431	-0.830306456	-0.880910396	-0.92303928	-0.956287795	-0.980336063	-0.994952721	-0.999997146	-0.995420806	-0.981267729
0.097967609	0.194992693	0.290141792	0.382499497	0.471177254	0.555321913	0.634123934	0.706825181	0.77272621	0.831193	0.881663054	0.923650812	0.956752317	0.980649106	0.995111274	0.999999683	0.995267302	0.980959662	0.957214412	0.924260001	0.882413476	0.832077435	0.773736149	0.707950909	0.635354619	0.556645715	0.472581438	0.383970553	0.291665567	0.196554527	0.099552477	0.001592653	-0.096382494	-0.193430364	-0.288617281	-0.381027471	-0.469771875	-0.553996702	-0.632891641	-0.705697661	-0.77171431	-0.830306456	-0.880910396	-0.92303928	-0.956287795	-0.980336063	-0.994952721	-0.999997146	-0.995420806	-0.981267729
0.097967609	0.194992693	0.290141792	0.382499497	0.471177254	0.555321913	0.634123934	0.706825181	0.77272621	0.831193	0.881663054	0.923650812	0.956752317	0.980649106	0.995111274	0.999999683	0.995267302	0.980959662	0.957214412	0.924260001	0.882413476	0.832077435	0.773736149	0.707950909	0.635354619	0.556645715	0.472581438	0.383970553	0.291665567	0.196554527	0.099552477	0.001592653	-0.096382494	-0.193430364	-0.288617281	-0.381027471	-0.469771875	-0.553996702	-0.632891641	-0.705697661	-0.77171431	-0.830306456	-0.880910396	-0.92303928	-0.956287795	-0.980336063	-0.994952721	-0.999997146	-0.995420806	-0.981267729
0.097967609	0.194992693	0.290141792	0.382499497	0.471177254	0.555321913	0.634123934	0.706825181	0.77272621	0.831193	0.881663054	0.923650812	0.956752317	0.980649106	0.995111274	0.999999683	0.995267302	0.980959662	0.957214412	0.924260001	0.882413476	0.832077435	0.773736149	0.707950909	0.635354619	0.556645715	0.472581438	0.383970553	0.291665567	0.196554527	0.099552477	0.001592653	-0.096382494	-0.193430364	-0.288617281	-0.381027471	-0.469771875	-0.553996702	-0.632891641	-0.705697661	-0.77171431	-0.830306456	-0.880910396	-0.92303928	-0.956287795	-0.980336063	-0.994952721	-0.999997146	-0.995420806	-0.981267729
0.097967609	0.194992693	0.290141792	0.382499497	0.471177254	0.555321913	0.634123934	0.706825181	0.77272621	0.831193	0.881663054	0.923650812	0.956752317	0.980649106	0.995111274	0.999999683	0.995267302	0.980959662	0.957214412	0.924260001	0.882413476	0.832077435	0.773736149	0.707950909	0.635354619	0.556645715	0.472581438	0.383970553	0.291665567	0.196554527	0.099552477	0.001592653	-0.096382494	-0.193430364	-0.288617281	-0.381027471	-0.469771875	-0.553996702	-0.632891641	-0.705697661	-0.77171431	-0.830306456	-0.880910396	-0.92303928	-0.956287795	-0.980336063	-0.994952721	-0.999997146	-0.995420806	-0.981267729
0.097967609	0.194992693	0.290141792	0.382499497	0.471177254	0.555321913	0.634123934	0.706825181	0.77272621	0.831193	0.881663054	0.923650812	0.956752317	0.980649106	0.995111274	0.999999683	0.995267302	0.980959662	0.957214412	0.924260001	0.882413476	0.832077435	0.773736149	0.707950909	0.416479619	0.556645715	0.472581438	0.383970553	0.291665567	0.196554527	0.099552477	0.001592653	-0.096382494	-0.193430364	-0.288617281	-0.381027471	-0.469771875	-0.553996702	-0.632891641	-0.705697661	-0.77171431	-0.830306456	-0.880910396	-0.92303928	-0.956287795	-0.980336063	-0.994952721	-0.999997146	-0.995420806	-0.981267729
0.098159859	0.195757843	0.291849015	0.385499035	0.475793265	0.561845728	0.642807838	0.717876804	0.786303634	0.847400656	0.900548471	0.945202284	0.980897527	1.007254736	1.023983611	1.030886225	1.02785935	1.014895859	0.992085195	0.9596129	0.917759193	0.866896618	0.807486771	0.740076137	0.665291084	0.583832037	0.496466908	0.404023834	0.307383284	0.207469631	0.105242247	0.001686226	-0.102197192	-0.205400379	-0.306919194	-0.405762842	-0.500963651	-0.591586649	-0.676738846	-0.755578148	-0.82732178	-0.89125416	-0.94673413	-0.993201475	-1.030182659	-1.057295715	-1.074254254	-1.080870522	-1.077057502	-1.062830016
0.097967609	0.194992693	0.290141792	0.382499497	0.471177254	0.555321913	0.634123934	0.706825181	0.77272621	0.831193	0.881663054	0.923650812	0.956752317	0.980649106	0.995111274	0.999999683	0.995267302	0.980959662	0.957214412	0.924260001	0.882413476	0.832077435	0.773736149	0.707950909	0.635354619	0.556645715	0.472581438	0.383970553	0.291665567	0.196554527	0.099552477	0.001592653	-0.096382494	-0.193430364	-0.288617281	-0.381027471	-0.469771875	-0.553996702	-0.632891641	-0.705697661	-0.77171431	-0.830306456	-0.880910396	-0.92303928	-0.956287795	-0.980336063	-0.994952721	-0.999997146	-0.995420806	-0.981267729
0.098159859	0.195757843	0.291849015	0.385499035	0.475793265	0.561845728	0.642807838	0.717876804	0.786303634	0.847400656	0.900548471	0.945202284	0.980897527	1.007254736	1.023983611	1.030886225	1.02785935	1.014895859	0.992085195	0.9596129	0.917759193	0.866896618	0.807486771	0.740076137	0.665291084	0.583832037	0.496466908	0.404023834	0.307383284	0.207469631	0.105242247	0.001686226	-0.102197192	-0.205400379	-0.306919194	-0.405762842	-0.500963651	-0.591586649	-0.676738846	-0.755578148	-0.82732178	-0.89125416	-0.94673413	-0.993201475	-1.030182659	-1.057295715	-1.074254254	-1.080870522	-1.077057502	-1.062830016
0.218351303	0.414037793	0.568898077	0.67278742	0.725332076	0.73555012	0.719443421	0.696122744	0.683359446	0.693586013	0.731261481	0.792197704	0.864979995	0.934117529	0.984142883	1.003647696	0.988252198	0.941762359	0.875211465	0.804007229	0.743882547	0.70665825	0.696889374	0.710263118	0.7341939	0.750521979	0.739700504	0.685481867	0.578981624	0.421140174	0.222983372	0.00360822	-0.213641181	-0.405920669	-0.555465454	-0.652969951	-0.699036527	-0.703425685	-0.682352525	-0.654512653	-0.63678523	-0.640597226	-0.669742322	-0.72008406	-0.781126144	-0.839007789	-0.880172903	-0.894832488	-0.879411475	-0.837421527
0.097967609	0.194992693	0.290141792	0.382499497	0.471177254	0.555321913	0.634123934	0.706825181	0.77272621	0.831193	0.881663054	0.923650812	0.956752317	0.980649106	0.995111274	0.999999683	0.995267302	0.980959662	0.957214412	0.924260001	0.882413476	0.832077435	0.773736149	0.707950909	1.122267119	0.556645715	0.472581438	0.383970553	0.291665567	0.196554527	0.099552477	0.001592653	-0.096382494	-0.193430364	-0.288617281	-0.381027471	-0.469771875	-0.553996702	-0.632891641	-0.705697661	-0.77171431	-0.830306456	-0.880910396	-0.92303928	-0.956287795	-0.980336063	-0.994952721	-0.999997146	-0.995420806	-0.981267729
0.263186148	0.474633356	0.601657613	0.641825681	0.621827508	0.584849463	0.572125137	0.606638299	0.685730686	0.785233501	0.872588977	0.922572748	0.928362355	0.90313838	0.871966381	0.85825824	0.871554889	0.902606598	0.928142122	0.923008692	0.873745489	0.786834405	0.687268236	0.6076079	0.572280117	0.584355675	0.621238414	0.641877483	0.602965733	0.477419167	0.267154094	0.004422977	-0.259204128	-0.471824601	-0.600325936	-0.641757648	-0.622412179	-0.58535007	-0.5719832	-0.605680942	-0.684198706	-0.783629222	-0.871422186	-0.922124692	-0.928574139	-0.903668635	-0.872382802	-0.858265798	-0.871148404	-0.902073409
0.097967609	0.194992693	0.290141792	0.382499497	0.471177254	0.555321913	0.634123934	0.706825181	0.77272621	0.831193	0.881663054	0.923650812	0.956752317	0.980649106	0.995111274	0.999999683	0.995267302	0.980959662	0.957214412	0.924260001	0.882413476	0.832077435	0.773736149	0.707950909	0.635354619	0.556645715	0.472581438	0.383970553	0.291665567	0.196554527	0.099552477	0.001592653	-0.096382494	-0.193430364	-0.288617281	-0.381027471	-0.469771875	-0.553996702	-0.632891641	-0.705697661	-0.77171431	-0.830306456	-0.880910396	-0.92303928	-0.956287795	-0.980336063	-0.994952721	-0.999997146	-0.995420806	-0.981267729
0.199040655	0.378981862	0.524491873	0.626946033	0.68589485	0.708747387	0.708757576	0.701783597	0.702567766	0.721392134	0.761876055	0.820414297	0.887367324	0.949698671	0.994406319	1.011900518	0.99848956	0.957349123	0.897721493	0.832529565	0.774989594	0.73506621	0.716666074	0.716296462	0.723561408	0.723417187	0.699672604	0.638906681	0.533865427	0.385518091	0.203272061	0.003284701	-0.194738617	-0.371518381	-0.512034274	-0.608354587	-0.660849723	-0.677566019	-0.671964674	-0.659597337	-0.654511177	-0.666206715	-0.697812252	-0.745834349	-0.801470149	-0.853111764	-0.889414399	-0.902191576	-0.888460967	-0.851173677
0.276723791	0.497487742	0.62697024	0.66261371	0.63340254	0.586185903	0.565694142	0.596886262	0.676942568	0.779739049	0.870059247	0.920623191	0.924075654	0.89472006	0.859725288	0.844461338	0.859266302	0.894117628	0.923797768	0.921043506	0.871248007	0.781397734	0.678521945	0.597840617	0.565757219	0.585538349	0.632644913	0.662544565	0.628257364	0.50037216	0.280886656	0.00465506	-0.272545704	-0.494578516	-0.625657663	-0.662665357	-0.634155477	-0.586840962	-0.56564533	-0.595945322	-0.67536939	-0.778076888	-0.868859544	-0.920189957	-0.924344596	-0.895321051	-0.860189827	-0.844469739	-0.858812955	-0.893513883
0.177498285	0.339844905	0.474841551	0.5755475	0.641430822	0.678121022	0.695831817	0.706822559	0.722484129	0.750719562	0.794219945	0.850026293	0.910464839	0.965216544	1.004008884	1.019265527	1.008056635	0.972860328	0.920936383	0.86245701	0.807852337	0.765031662	0.737183	0.721720155	0.710669391	0.692434453	0.654536728	0.586682162	0.483419608	0.345748376	0.181282553	0.002923877	-0.173651654	-0.333111828	-0.463475702	-0.558333762	-0.617801036	-0.648027739	-0.659427958	-0.664074335	-0.672880177	-0.693214304	-0.727468998	-0.772862894	-0.822467757	-0.867169467	-0.898070863	-0.908759206	-0.896908161	-0.864848236
0.051025738	0.186487476	0.35948707	0.509684983	0.583698423	0.553184631	0.424516021	0.236784222	0.048799364	0.080543899	0.11192881	0.038692945	0.1110783	0.284140356	0.420126438	0.471955096	0.421733472	0.286799258	0.113866217	0.036754746	0.111543837	0.081901595	0.046089712	0.233564467	0.421798392	0.551813644	0.584069222	0.511612836	0.36227187	0.189151445	0.052644212	1.38E-05	-0.049430182	-0.183833704	-0.356696103	-0.507736485	-0.583299289	-0.554529008	-0.427217638	-0.240003908	-0.051524914	-0.079159647	-0.112285423	-0.040610403	-0.108296683	-0.281471382	-0.418496562	-0.471927401	-0.423317513	-0.289447836
0.097967609	0.194992693	0.290141792	0.382499497	0.471177254	0.555321913	0.634123934	0.706825181	0.77272621	0.831193	0.881663054	0.923650812	0.956752317	0.980649106	0.995111274	0.999999683	0.995267302	0.980959662	0.957214412	0.924260001	0.882413476	0.832077435	0.773736149	0.707950909	0.635354619	0.556645715	0.472581438	0.383970553	0.291665567	0.196554527	0.099552477	0.001592653	-0.096382494	-0.193430364	-0.288617281	-0.381027471	-0.469771875	-0.553996702	-0.632891641	-0.705697661	-0.77171431	-0.830306456	-0.880910396	-0.92303928	-0.956287795	-0.980336063	-0.994952721	-0.999997146	-0.995420806	-0.981267729
0.097967609	0.194992693	0.290141792	0.382499497	0.471177254	0.555321913	0.634123934	0.706825181	0.77272621	0.831193	0.881663054	0.923650812	0.956752317	0.980649106	0.995111274	0.999999683	0.995267302	0.980959662	0.957214412	0.924260001	0.882413476	0.832077435	0.773736149	0.707950909	0.500854619	0.556645715	0.472581438	0.383970553	0.291665567	0.196554527	0.099552477	0.001592653	-0.096382494	-0.193430364	-0.288617281	-0.381027471	-0.469771875	-0.553996702	-0.632891641	-0.705697661	-0.77171431	-0.830306456	-0.880910396	-0.92303928	-0.956287795	-0.980336063	-0.994952721	-0.999997146	-0.995420806	-0.981267729
0.097967609	0.194992693	0.290141792	0.382499497	0.471177254	0.555321913	0.634123934	0.706825181	0.77272621	0.831193	0.881663054	0.923650812	0.956752317	0.980649106	0.995111274	0.999999683	0.995267302	0.980959662	0.957214412	0.924260001	0.882413476	0.832077435	0.773736149	0.707950909	0.635354619	0.556645715	0.472581438	0.383970553	0.291665567	0.196554527	0.099552477	0.001592653	-0.096382494	-0.193430364	-0.288617281	-0.381027471	-0.469771875	-0.553996702	-0.632891641	-0.705697661	-0.77171431	-0.830306456	-0.880910396	-0.92303928	-0.956287795	-0.980336063	-0.994952721	-0.999997146	-0.995420806	-0.981267729
0.097967609	0.194992693	0.290141792	0.382499497	0.471177254	0.555321913	0.634123934	0.706825181	0.77272621	0.831193	0.881663054	0.923650812	0.956752317	0.980649106	0.995111274	0.999999683	0.995267302	0.980959662	0.957214412	0.924260001	0.882413476	0.832077435	0.773736149	0.707950909	0.635354619	0.556645715	0.472581438	0.383970553	0.291665567	0.196554527	0.099552477	0.001592653	-0.096382494	-0.193430364	-0.288617281	-0.381027471	-0.469771875	-0.553996702	-0.632891641	-0.705697661	-0.77171431	-0.830306456	-0.880910396	-0.92303928	-0.956287795	-0.980336063	-0.994952721	-0.999997146	-0.995420806	-0.981267729
0.097967609	0.194992693	0.290141792	0.382499497	0.471177254	0.555321913	0.634123934	0.706825181	0.77272621	0.831193	0.881663054	0.923650812	0.956752317	0.980649106	0.995111274	0.999999683	0.995267302	0.980959662	0.957214412	0.924260001	0.882413476	0.832077435	0.773736149	0.707950909	0.635354619	0.556645715	0.472581438	0.383970553	0.291665567	0.196554527	0.099552477	0.001592653	-0.096382494	-0.193430364	-0.288617281	-0.381027471	-0.469771875	-0.553996702	-0.632891641	-0.705697661	-0.77171431	-0.830306456	-0.880910396	-0.92303928	-0.956287795	-0.980336063	-0.994952721	-0.999997146	-0.995420806	-0.981267729
0.097967609	0.194992693	0.290141792	0.382499497	0.471177254	0.555321913	0.634123934	0.706825181	0.77272621	0.831193	0.881663054	0.923650812	0.956752317	0.980649106	0.995111274	0.999999683	0.995267302	0.980959662	0.957214412	0.924260001	0.882413476	0.832077435	0.773736149	0.707950909	0.390042119	0.556645715	0.472581438	0.383970553	0.291665567	0.196554527	0.099552477	0.001592653	-0.096382494	-0.193430364	-0.288617281	-0.381027471	-0.469771875	-0.553996702	-0.632891641	-0.705697661	-0.77171431	-0.830306456	-0.880910396	-0.92303928	-0.956287795	-0.980336063	-0.994952721	-0.999997146	-0.995420806	-0.981267729
0.097967609	0.194992693	0.290141792	0.382499497	0.471177254	0.555321913	0.634123934	0.706825181	0.77272621	0.831193	0.881663054	0.923650812	0.956752317	0.980649106	0.995111274	0.999999683	0.995267302	0.980959662	0.957214412	0.924260001	0.882413476	0.832077435	0.773736149	0.707950909	0.635354619	0.556645715	0.472581438	0.383970553	0.291665567	0.196554527	0.099552477	0.001592653	-0.096382494	-0.193430364	-0.288617281	-0.381027471	-0.469771875	-0.553996702	-0.632891641	-0.705697661	-0.77171431	-0.830306456	-0.880910396	-0.92303928	-0.956287795	-0.980336063	-0.994952721	-0.999997146	-0.995420806	-0.981267729
0.23582636	0.42841576	0.55039733	0.599589133	0.598060873	0.581622701	0.584466379	0.625598204	0.702685717	0.795498609	0.876834376	0.925609193	0.936074009	0.919148262	0.895661555	0.885082168	0.895345565	0.918758474	0.935969448	0.926076028	0.877925216	0.796982289	0.704138051	0.626597426	0.584805272	0.581437327	0.597809857	0.599883111	0.551746269	0.431001469	0.239400206	0.003954018	-0.232240755	-0.425810865	-0.549028653	-0.599281477	-0.598308003	-0.581813511	-0.584138072	-0.624608871	-0.701237685	-0.794011759	-0.875734597	-0.925131875	-0.936171122	-0.919536355	-0.895981217	-0.885088027	-0.895033315	-0.91836709
0.097967609	0.194992693	0.290141792	0.382499497	0.471177254	0.555321913	0.634123934	0.706825181	0.77272621	0.831193	0.881663054	0.923650812	0.956752317	0.980649106	0.995111274	0.999999683	0.995267302	0.980959662	0.957214412	0.924260001	0.882413476	0.832077435	0.773736149	0.707950909	0.635354619	0.556645715	0.472581438	0.383970553	0.291665567	0.196554527	0.099552477	0.001592653	-0.096382494	-0.193430364	-0.288617281	-0.381027471	-0.469771875	-0.553996702	-0.632891641	-0.705697661	-0.77171431	-0.830306456	-0.880910396	-0.92303928	-0.956287795	-0.980336063	-0.994952721	-0.999997146	-0.995420806	-0.981267729
0.029772413	0.110886898	0.221427338	0.33293683	0.419663446	0.466778782	0.474819242	0.458875757	0.442828938	0.450597093	0.497371441	0.583817169	0.695219243	0.8058848	0.887340929	0.917584816	0.888284435	0.807513077	0.697099681	0.585484514	0.498478012	0.45102165	0.442707857	0.458546384	0.474694912	0.467198029	0.420764619	0.334600773	0.223307857	0.112519112	0.03072283	8.03E-06	-0.028835835	-0.109262586	-0.219547012	-0.331266106	-0.418551485	-0.466348906	-0.474937051	-0.459205103	-0.442956494	-0.450183146	-0.496275675	-0.582156652	-0.693338675	-0.804248679	-0.886383617	-0.917568753	-0.889214066	-0.809133394
0.098159859	0.195757843	0.291849015	0.385499035	0.475793265	0.561845728	0.642807838	0.717876804	0.786303634	0.847400656	0.900548471	0.945202284	0.980897527	1.007254736	1.023983611	1.030886225	1.02785935	1.014895859	0.992085195	0.9596129	0.917759193	0.866896618	0.807486771	0.740076137	0.665291084	0.583832037	0.496466908	0.404023834	0.307383284	0.207469631	0.105242247	0.001686226	-0.102197192	-0.205400379	-0.306919194	-0.405762842	-0.500963651	-0.591586649	-0.676738846	-0.755578148	-0.82732178	-0.89125416	-0.94673413	-0.993201475	-1.030182659	-1.057295715	-1.074254254	-1.080870522	-1.077057502	-1.062830016
0.098159859	0.195757843	0.291849015	0.385499035	0.475793265	0.561845728	0.642807838	0.717876804	0.786303634	0.847400656	0.900548471	0.945202284	0.980897527	1.007254736	1.023983611	1.030886225	1.02785935	1.014895859	0.992085195	0.9596129	0.917759193	0.866896618	0.807486771	0.740076137	0.665291084	0.583832037	0.496466908	0.404023834	0.307383284	0.207469631	0.105242247	0.001686226	-0.102197192	-0.205400379	-0.306919194	-0.405762842	-0.500963651	-0.591586649	-0.676738846	-0.755578148	-0.82732178	-0.89125416	-0.94673413	-0.993201475	-1.030182659	-1.057295715	-1.074254254	-1.080870522	-1.077057502	-1.062830016
0.097967609	0.194992693	0.290141792	0.382499497	0.471177254	0.555321913	0.634123934	0.706825181	0.77272621	0.831193	0.881663054	0.923650812	0.956752317	0.980649106	0.995111274	0.999999683	0.995267302	0.980959662	0.957214412	0.924260001	0.882413476	0.832077435	0.773736149	0.707950909	0.635354619	0.556645715	0.472581438	0.383970553	0.291665567	0.196554527	0.099552477	0.001592653	-0.096382494	-0.193430364	-0.288617281	-0.381027471	-0.469771875	-0.553996702	-0.632891641	-0.705697661	-0.77171431	-0.830306456	-0.880910396	-0.92303928	-0.956287795	-0.980336063	-0.994952721	-0.999997146	-0.995420806	-0.981267729
0.097967609	0.194992693	0.290141792	0.382499497	0.471177254	0.555321913	0.634123934	0.706825181	0.77272621	0.831193	0.881663054	0.923650812	0.956752317	0.980649106	0.995111274	0.999999683	0.995267302	0.980959662	0.957214412	0.924260001	0.882413476	0.832077435	0.773736149	0.707950909	0.635354619	0.556645715	0.472581438	0.383970553	0.291665567	0.196554527	0.099552477	0.001592653	-0.096382494	-0.193430364	-0.288617281	-0.381027471	-0.469771875	-0.553996702	-0.632891641	-0.705697661	-0.77171431	-0.830306456	-0.880910396	-0.92303928	-0.956287795	-0.980336063	-0.994952721	-0.999997146	-0.995420806	-0.981267729
0.212074392	0.402645719	0.554474581	0.657911471	0.712557827	0.726907242	0.716065957	0.698084654	0.689747461	0.70278596	0.741385444	0.801547627	0.872436222	0.939360156	0.987655374	1.00650612	0.991756825	0.947008048	0.882709437	0.813458981	0.754169504	0.716057011	0.70346534	0.712349048	0.73083624	0.74178277	0.726735489	0.670368102	0.564327675	0.409564185	0.216576241	0.003503052	-0.207496902	-0.394740945	-0.541358503	-0.638491565	-0.686666777	-0.69508591	-0.679066518	-0.656279565	-0.642681247	-0.649070684	-0.679024676	-0.728616282	-0.787901043	-0.843752339	-0.883334693	-0.897381341	-0.882510385	-0.842050825
0.219429936	0.415995143	0.571375573	0.675341279	0.727522802	0.737028484	0.720014343	0.695773588	0.682247482	0.691989144	0.72950473	0.79057343	0.863681028	0.933199074	0.983521895	1.003139155	0.987632501	0.940843254	0.87390514	0.802365215	0.742097499	0.705026902	0.695744797	0.709892359	0.734761176	0.752016715	0.741923889	0.688076524	0.581498689	0.423129117	0.224084379	0.003626293	-0.214697024	-0.40784154	-0.557888593	-0.655455587	-0.701157935	-0.704852303	-0.682908264	-0.654197766	-0.635758813	-0.639126428	-0.668131622	-0.718601882	-0.779945948	-0.838176691	-0.879614007	-0.894379025	-0.878863431	-0.836610322
0.097967609	0.194992693	0.290141792	0.382499497	0.471177254	0.555321913	0.634123934	0.706825181	0.77272621	0.831193	0.881663054	0.923650812	0.956752317	0.980649106	0.995111274	0.999999683	0.995267302	0.980959662	0.957214412	0.924260001	0.882413476	0.832077435	0.773736149	0.707950909	1.084204619	0.556645715	0.472581438	0.383970553	0.291665567	0.196554527	0.099552477	0.001592653	-0.096382494	-0.193430364	-0.288617281	-0.381027471	-0.469771875	-0.553996702	-0.632891641	-0.705697661	-0.77171431	-0.830306456	-0.880910396	-0.92303928	-0.956287795	-0.980336063	-0.994952721	-0.999997146	-0.995420806	-0.981267729
0.069771598	0.253251286	0.481885597	0.668385242	0.738356846	0.661888267	0.489678832	0.425737308	0.616017476	0.844857692	0.973597069	0.980350703	0.914990371	0.857634938	0.84676674	0.852147522	0.846852392	0.857095981	0.913792659	0.979657952	0.974626654	0.847925349	0.620022042	0.427114979	0.486953598	0.659565152	0.738280332	0.670608141	0.485485319	0.256828735	0.07197951	1.90E-05	-0.067594626	-0.249686166	-0.478274488	-0.666130661	-0.738393134	-0.664182838	-0.492429302	-0.424442041	-0.612018385	-0.841761359	-0.972533762	-0.981023642	-0.916191208	-0.858188115	-0.846685151	-0.8521432	-0.846941882	-0.85657122
0.09808842	0.195475742	0.291224649	0.384411126	0.474133332	0.559520297	0.639740339	0.714009131	0.781597346	0.841837792	0.894131976	0.937956033	0.972865957	0.998502085	1.01459279	1.020957341	1.0175079	1.004250645	0.981285982	0.948807873	0.907102248	0.856544547	0.797596382	0.730801372	0.656780176	0.576224762	0.489891989	0.398596528	0.303203214	0.204618888	0.103783807	0.001662701	-0.100764427	-0.202511694	-0.302596804	-0.400050527	-0.493926074	-0.583308297	-0.667322611	-0.745143563	-0.816002946	-0.879197405	-0.93409543	-0.980143688	-1.016872624	-1.043901263	-1.060941184	-1.067799604	-1.064381554	-1.050691114
0.097967609	0.194992693	0.290141792	0.382499497	0.471177254	0.555321913	0.634123934	0.706825181	0.77272621	0.831193	0.881663054	0.923650812	0.956752317	0.980649106	0.995111274	0.999999683	0.995267302	0.980959662	0.957214412	0.924260001	0.882413476	0.832077435	0.773736149	0.707950909	0.891342119	0.556645715	0.472581438	0.383970553	0.291665567	0.196554527	0.099552477	0.001592653	-0.096382494	-0.193430364	-0.288617281	-0.381027471	-0.469771875	-0.553996702	-0.632891641	-0.705697661	-0.77171431	-0.830306456	-0.880910396	-0.92303928	-0.956287795	-0.980336063	-0.994952721	-0.999997146	-0.995420806	-0.981267729
0.097967609	0.194992693	0.290141792	0.382499497	0.471177254	0.555321913	0.634123934	0.706825181	0.77272621	0.831193	0.881663054	0.923650812	0.956752317	0.980649106	0.995111274	0.999999683	0.995267302	0.980959662	0.957214412	0.924260001	0.882413476	0.832077435	0.773736149	0.707950909	0.635354619	0.556645715	0.472581438	0.383970553	0.291665567	0.196554527	0.099552477	0.001592653	-0.096382494	-0.193430364	-0.288617281	-0.381027471	-0.469771875	-0.553996702	-0.632891641	-0.705697661	-0.77171431	-0.830306456	-0.880910396	-0.92303928	-0.956287795	-0.980336063	-0.994952721	-0.999997146	-0.995420806	-0.981267729
0.205131729	0.376520656	0.492729608	0.551858604	0.570820018	0.577189478	0.59729752	0.645710588	0.72046104	0.805716976	0.880256061	0.927618251	0.943253596	0.935557366	0.92062992	0.913536583	0.92042033	0.935325654	0.943277495	0.928118665	0.881272454	0.807068448	0.721816718	0.6467412	0.597839915	0.577346479	0.570944378	0.552420779	0.494121844	0.378880608	0.208263177	0.003428027	-0.201991105	-0.374145713	-0.491321899	-0.551285601	-0.570692372	-0.577036372	-0.596762968	-0.644687237	-0.719108253	-0.804362566	-0.879232227	-0.927109176	-0.943223369	-0.935787198	-0.920841785	-0.91354055	-0.920213065	-0.93509214
0.070288096	0.255132662	0.485493296	0.673473352	0.744204643	0.667736722	0.49562147	0.433054193	0.624669283	0.855076506	0.985153754	0.992833873	0.928244419	0.87163791	0.861261942	0.866792959	0.861352589	0.871109692	0.927059344	0.992153985	0.986201336	0.858169051	0.628697814	0.434455136	0.492908341	0.665410356	0.744133407	0.675715208	0.489120621	0.25873685	0.072512371	1.91E-05	-0.068094992	-0.251540902	-0.481854518	-0.671199615	-0.744235435	-0.670034535	-0.498360331	-0.431735443	-0.620646339	-0.85195521	-0.98407233	-0.993493911	-0.929432625	-0.872180273	-0.861175266	-0.866788562	-0.861446981	-0.870595593
0.098159859	0.195757843	0.291849015	0.385499035	0.475793265	0.561845728	0.642807838	0.717876804	0.786303634	0.847400656	0.900548471	0.945202284	0.980897527	1.007254736	1.023983611	1.030886225	1.02785935	1.014895859	0.992085195	0.9596129	0.917759193	0.866896618	0.807486771	0.740076137	0.665291084	0.583832037	0.496466908	0.404023834	0.307383284	0.207469631	0.105242247	0.001686226	-0.102197192	-0.205400379	-0.306919194	-0.405762842	-0.500963651	-0.591586649	-0.676738846	-0.755578148	-0.82732178	-0.89125416	-0.94673413	-0.993201475	-1.030182659	-1.057295715	-1.074254254	-1.080870522	-1.077057502	-1.062830016
0.179358667	0.33291145	0.444182031	0.511507194	0.547489561	0.572822861	0.607267703	0.661680332	0.734398878	0.81326865	0.882066575	0.928198024	0.948115806	0.948105722	0.940315411	0.936130107	0.94019457	0.94800577	0.948246531	0.928725779	0.883019848	0.814508562	0.735672562	0.662735841	0.607978733	0.573264464	0.547926012	0.512291794	0.445608643	0.335080841	0.182118447	0.002986476	-0.176591872	-0.330730575	-0.442743511	-0.510714151	-0.547050329	-0.572383867	-0.606562225	-0.66062989	-0.733126907	-0.812025998	-0.881107118	-0.927663132	-0.947979695	-0.948203643	-0.940437362	-0.936132496	-0.940074877	-0.947903846
0.097967609	0.194992693	0.290141792	0.382499497	0.471177254	0.555321913	0.634123934	0.706825181	0.77272621	0.831193	0.881663054	0.923650812	0.956752317	0.980649106	0.995111274	0.999999683	0.995267302	0.980959662	0.957214412	0.924260001	0.882413476	0.832077435	0.773736149	0.707950909	0.635354619	0.556645715	0.472581438	0.383970553	0.291665567	0.196554527	0.099552477	0.001592653	-0.096382494	-0.193430364	-0.288617281	-0.381027471	-0.469771875	-0.553996702	-0.632891641	-0.705697661	-0.77171431	-0.830306456	-0.880910396	-0.92303928	-0.956287795	-0.980336063	-0.994952721	-0.999997146	-0.995420806	-0.981267729
0.035443534	0.131246535	0.259317119	0.383298474	0.470551412	0.502795235	0.481837245	0.428477969	0.374979394	0.35365266	0.385429094	0.472284163	0.59608565	0.724272614	0.820469221	0.856472941	0.821590305	0.726182815	0.598231072	0.47407206	0.386422491	0.353711154	0.374298985	0.427516774	0.481152452	0.50284651	0.471537328	0.385081354	0.261461939	0.133161062	0.036572759	9.58E-06	-0.034330614	-0.129340697	-0.257171136	-0.381505589	-0.469550543	-0.502729507	-0.48251324	-0.429439126	-0.375668541	-0.35360859	-0.384450669	-0.470506331	-0.593941472	-0.722353797	-0.819331878	-0.856453782	-0.822695039	-0.728084251
0.098159859	0.195757843	0.291849015	0.385499035	0.475793265	0.561845728	0.642807838	0.717876804	0.786303634	0.847400656	0.900548471	0.945202284	0.980897527	1.007254736	1.023983611	1.030886225	1.02785935	1.014895859	0.992085195	0.9596129	0.917759193	0.866896618	0.807486771	0.740076137	0.665291084	0.583832037	0.496466908	0.404023834	0.307383284	0.207469631	0.105242247	0.001686226	-0.102197192	-0.205400379	-0.306919194	-0.405762842	-0.500963651	-0.591586649	-0.676738846	-0.755578148	-0.82732178	-0.89125416	-0.94673413	-0.993201475	-1.030182659	-1.057295715	-1.074254254	-1.080870522	-1.077057502	-1.062830016
0.028123395	0.104954379	0.210339892	0.318079612	0.404391869	0.455441838	0.471415476	0.465789832	0.460071045	0.475799692	0.526544424	0.612608771	0.72026129	0.825773928	0.902931231	0.931500289	0.903823067	0.827319768	0.722063155	0.614237843	0.52767861	0.476323388	0.46010384	0.465634878	0.471445344	0.455960765	0.405521245	0.319705736	0.212142024	0.106504036	0.029021784	7.58E-06	-0.027238128	-0.103412383	-0.208538324	-0.316447614	-0.403252881	-0.454913365	-0.471379733	-0.465944761	-0.460044083	-0.475285526	-0.525419866	-0.610985616	-0.718458919	-0.824220481	-0.902026306	-0.931485125	-0.90470175	-0.828857893
0.097967609	0.194992693	0.290141792	0.382499497	0.471177254	0.555321913	0.634123934	0.706825181	0.77272621	0.831193	0.881663054	0.923650812	0.956752317	0.980649106	0.995111274	0.999999683	0.995267302	0.980959662	0.957214412	0.924260001	0.882413476	0.832077435	0.773736149	0.707950909	0.635354619	0.556645715	0.472581438	0.383970553	0.291665567	0.196554527	0.099552477	0.001592653	-0.096382494	-0.193430364	-0.288617281	-0.381027471	-0.469771875	-0.553996702	-0.632891641	-0.705697661	-0.77171431	-0.830306456	-0.880910396	-0.92303928	-0.956287795	-0.980336063	-0.994952721	-0.999997146	-0.995420806	-0.981267729
0.097967609	0.194992693	0.290141792	0.382499497	0.471177254	0.555321913	0.634123934	0.706825181	0.77272621	0.831193	0.881663054	0.923650812	0.956752317	0.980649106	0.995111274	0.999999683	0.995267302	0.980959662	0.957214412	0.924260001	0.882413476	0.832077435	0.773736149	0.707950909	0.897417119	0.556645715	0.472581438	0.383970553	0.291665567	0.196554527	0.099552477	0.001592653	-0.096382494	-0.193430364	-0.288617281	-0.381027471	-0.469771875	-0.553996702	-0.632891641	-0.705697661	-0.77171431	-0.830306456	-0.880910396	-0.92303928	-0.956287795	-0.980336063	-0.994952721	-0.999997146	-0.995420806	-0.981267729
0.097967609	0.194992693	0.290141792	0.382499497	0.471177254	0.555321913	0.634123934	0.706825181	0.77272621	0.831193	0.881663054	0.923650812	0.956752317	0.980649106	0.995111274	0.999999683	0.995267302	0.980959662	0.957214412	0.924260001	0.882413476	0.832077435	0.773736149	0.707950909	0.635354619	0.556645715	0.472581438	0.383970553	0.291665567	0.196554527	0.099552477	0.001592653	-0.096382494	-0.193430364	-0.288617281	-0.381027471	-0.469771875	-0.553996702	-0.632891641	-0.705697661	-0.77171431	-0.830306456	-0.880910396	-0.92303928	-0.956287795	-0.980336063	-0.994952721	-0.999997146	-0.995420806	-0.981267729
0.097967609	0.194992693	0.290141792	0.382499497	0.471177254	0.555321913	0.634123934	0.706825181	0.77272621	0.831193	0.881663054	0.923650812	0.956752317	0.980649106	0.995111274	0.999999683	0.995267302	0.980959662	0.957214412	0.924260001	0.882413476	0.832077435	0.773736149	0.707950909	0.335329619	0.556645715	0.472581438	0.383970553	0.291665567	0.196554527	0.099552477	0.001592653	-0.096382494	-0.193430364	-0.288617281	-0.381027471	-0.469771875	-0.553996702	-0.632891641	-0.705697661	-0.77171431	-0.830306456	-0.880910396	-0.92303928	-0.956287795	-0.980336063	-0.994952721	-0.999997146	-0.995420806	-0.981267729
0.097967609	0.194992693	0.290141792	0.382499497	0.471177254	0.555321913	0.634123934	0.706825181	0.77272621	0.831193	0.881663054	0.923650812	0.956752317	0.980649106	0.995111274	0.999999683	0.995267302	0.980959662	0.957214412	0.924260001	0.882413476	0.832077435	0.773736149	0.707950909	0.491179619	0.556645715	0.472581438	0.383970553	0.291665567	0.196554527	0.099552477	0.001592653	-0.096382494	-0.193430364	-0.288617281	-0.381027471	-0.469771875	-0.553996702	-0.632891641	-0.705697661	-0.77171431	-0.830306456	-0.880910396	-0.92303928	-0.956287795	-0.980336063	-0.994952721	-0.999997146	-0.995420806	-0.981267729
0.097967609	0.194992693	0.290141792	0.382499497	0.471177254	0.555321913	0.634123934	0.706825181	0.77272621	0.831193	0.881663054	0.923650812	0.956752317	0.980649106	0.995111274	0.999999683	0.995267302	0.980959662	0.957214412	0.924260001	0.882413476	0.832077435	0.773736149	0.707950909	0.635354619	0.556645715	0.472581438	0.383970553	0.291665567	0.196554527	0.099552477	0.001592653	-0.096382494	-0.193430364	-0.288617281	-0.381027471	-0.469771875	-0.553996702	-0.632891641	-0.705697661	-0.77171431	-0.830306456	-0.880910396	-0.92303928	-0.956287795	-0.980336063	-0.994952721	-0.999997146	-0.995420806	-0.981267729
0.097967609	0.194992693	0.290141792	0.382499497	0.471177254	0.555321913	0.634123934	0.706825181	0.77272621	0.831193	0.881663054	0.923650812	0.956752317	0.980649106	0.995111274	0.999999683	0.995267302	0.980959662	0.957214412	0.924260001	0.882413476	0.832077435	0.773736149	0.707950909	0.635354619	0.556645715	0.472581438	0.383970553	0.291665567	0.196554527	0.099552477	0.001592653	-0.096382494	-0.193430364	-0.288617281	-0.381027471	-0.469771875	-0.553996702	-0.632891641	-0.705697661	-0.77171431	-0.830306456	-0.880910396	-0.92303928	-0.956287795	-0.980336063	-0.994952721	-0.999997146	-0.995420806	-0.981267729
0.097967609	0.194992693	0.290141792	0.382499497	0.471177254	0.555321913	0.634123934	0.706825181	0.77272621	0.831193	0.881663054	0.923650812	0.956752317	0.980649106	0.995111274	0.999999683	0.995267302	0.980959662	0.957214412	0.924260001	0.882413476	0.832077435	0.773736149	0.707950909	0.635354619	0.556645715	0.472581438	0.383970553	0.291665567	0.196554527	0.099552477	0.001592653	-0.096382494	-0.193430364	-0.288617281	-0.381027471	-0.469771875	-0.553996702	-0.632891641	-0.705697661	-0.77171431	-0.830306456	-0.880910396	-0.92303928	-0.956287795	-0.980336063	-0.994952721	-0.999997146	-0.995420806	-0.981267729
0.097967609	0.194992693	0.290141792	0.382499497	0.471177254	0.555321913	0.634123934	0.706825181	0.77272621	0.831193	0.881663054	0.923650812	0.956752317	0.980649106	0.995111274	0.999999683	0.995267302	0.980959662	0.957214412	0.924260001	0.882413476	0.832077435	0.773736149	0.707950909	0.635354619	0.556645715	0.472581438	0.383970553	0.291665567	0.196554527	0.099552477	0.001592653	-0.096382494	-0.193430364	-0.288617281	-0.381027471	-0.469771875	-0.553996702	-0.632891641	-0.705697661	-0.77171431	-0.830306456	-0.880910396	-0.92303928	-0.956287795	-0.980336063	-0.994952721	-0.999997146	-0.995420806	-0.981267729
0.017793765	0.067691645	0.140320071	0.223286488	0.304889159	0.377434193	0.439066777	0.493529145	0.547960057	0.609512856	0.681968475	0.763521423	0.846520408	0.919284237	0.969410712	0.987488302	0.969978598	0.920309946	0.847817761	0.764884702	0.683232825	0.610598496	0.548885868	0.494391553	0.439991609	0.378518332	0.306152245	0.224649536	0.14161877	0.068720376	0.018365943	4.77E-06	-0.017230179	-0.06666897	-0.139024079	-0.221922988	-0.303623552	-0.37634705	-0.438139978	-0.492666729	-0.547036198	-0.608430217	-0.680706658	-0.762158617	-0.845220376	-0.918252496	-0.968834248	-0.987478767	-0.970537877	-0.921329574
0.034343771	0.127304099	0.252001876	0.373631038	0.460903004	0.49621131	0.481107952	0.435264767	0.389289382	0.373836318	0.408702213	0.495599476	0.617063214	0.741879311	0.835223267	0.870110029	0.836309931	0.743735054	0.619157955	0.497365488	0.40972001	0.373969185	0.3887215	0.434430406	0.48053591	0.496337334	0.461913731	0.375392352	0.254096153	0.129164096	0.035438338	9.28E-06	-0.033265033	-0.125452645	-0.249906709	-0.371860358	-0.459878147	-0.496071588	-0.481671645	-0.436099092	-0.389865555	-0.373717123	-0.407698564	-0.493842887	-0.61496944	-0.740015096	-0.834120819	-0.870091472	-0.837380723	-0.745582183
0.267195037	0.48140219	0.609156984	0.64798936	0.625268133	0.585263422	0.570243435	0.603776367	0.683156164	0.783635484	0.871869868	0.922026706	0.927125884	0.900680211	0.868377584	0.854209261	0.867952043	0.900127535	0.926888608	0.922458046	0.873035947	0.785253514	0.684706124	0.604741494	0.570371264	0.58472418	0.624629219	0.648005425	0.610458942	0.48421723	0.27122071	0.004491701	-0.26315495	-0.478563656	-0.607830908	-0.64795669	-0.625902545	-0.585809684	-0.570129011	-0.60282383	-0.68161196	-0.782014049	-0.870693314	-0.921583015	-0.927354565	-0.901231386	-0.868808237	-0.854217068	-0.867531698	-0.89957348
0.097967609	0.194992693	0.290141792	0.382499497	0.471177254	0.555321913	0.634123934	0.706825181	0.77272621	0.831193	0.881663054	0.923650812	0.956752317	0.980649106	0.995111274	0.999999683	0.995267302	0.980959662	0.957214412	0.924260001	0.882413476	0.832077435	0.773736149	0.707950909	0.635354619	0.556645715	0.472581438	0.383970553	0.291665567	0.196554527	0.099552477	0.001592653	-0.096382494	-0.193430364	-0.288617281	-0.381027471	-0.469771875	-0.553996702	-0.632891641	-0.705697661	-0.77171431	-0.830306456	-0.880910396	-0.92303928	-0.956287795	-0.980336063	-0.994952721	-0.999997146	-0.995420806	-0.981267729
0.098159859	0.195757843	0.291849015	0.385499035	0.475793265	0.561845728	0.642807838	0.717876804	0.786303634	0.847400656	0.900548471	0.945202284	0.980897527	1.007254736	1.023983611	1.030886225	1.02785935	1.014895859	0.992085195	0.9596129	0.917759193	0.866896618	0.807486771	0.740076137	0.665291084	0.583832037	0.496466908	0.404023834	0.307383284	0.207469631	0.105242247	0.001686226	-0.102197192	-0.205400379	-0.306919194	-0.405762842	-0.500963651	-0.591586649	-0.676738846	-0.755578148	-0.82732178	-0.89125416	-0.94673413	-0.993201475	-1.030182659	-1.057295715	-1.074254254	-1.080870522	-1.077057502	-1.062830016
0.197769665	0.376673655	0.521565759	0.623921017	0.683285011	0.706961369	0.708023922	0.702117666	0.703786389	0.723171202	0.763836452	0.822215149	0.888784157	0.950667931	0.99502609	1.012388119	0.999107422	0.958318363	0.899145814	0.834349767	0.776981483	0.736883883	0.717921095	0.716654118	0.722830487	0.721610703	0.697023498	0.635833145	0.530892479	0.383172585	0.201974695	0.00326341	-0.193494492	-0.369253232	-0.509172457	-0.605410566	-0.658322801	-0.675843159	-0.671252342	-0.659895922	-0.655635441	-0.667845149	-0.69960974	-0.747477942	-0.802757915	-0.853989466	-0.889972762	-0.902626379	-0.889006841	-0.852028505
0.098120998	0.195606	0.29151665	0.38492661	0.47493046	0.560652422	0.641254843	0.715946336	0.783989513	0.844708238	0.897494312	0.94181354	0.977211117	1.003316271	1.019846123	1.026608726	1.02350524	1.010531228	0.987777057	0.955427386	0.913759756	0.863142282	0.804030468	0.736963167	0.662557733	0.581504395	0.494559906	0.402540529	0.306314425	0.206793502	0.104924816	0.00168159	-0.101946048	-0.204960541	-0.306366484	-0.405180233	-0.50043943	-0.591212382	-0.676607174	-0.755780438	-0.8279457	-0.892381207	-0.948437163	-0.99554231	-1.033209767	-1.061042084	-1.078735455	-1.086083032	-1.082977324	-1.069411638
0.097967609	0.194992693	0.290141792	0.382499497	0.471177254	0.555321913	0.634123934	0.706825181	0.77272621	0.831193	0.881663054	0.923650812	0.956752317	0.980649106	0.995111274	0.999999683	0.995267302	0.980959662	0.957214412	0.924260001	0.882413476	0.832077435	0.773736149	0.707950909	0.635354619	0.556645715	0.472581438	0.383970553	0.291665567	0.196554527	0.099552477	0.001592653	-0.096382494	-0.193430364	-0.288617281	-0.381027471	-0.469771875	-0.553996702	-0.632891641	-0.705697661	-0.77171431	-0.830306456	-0.880910396	-0.92303928	-0.956287795	-0.980336063	-0.994952721	-0.999997146	-0.995420806	-0.981267729
0.184510687	0.341631413	0.453895728	0.519593085	0.55218614	0.573741991	0.605332357	0.658553877	0.731683594	0.811832891	0.88178093	0.928161606	0.947227571	0.945685589	0.93647214	0.931706891	0.9363336	0.945559369	0.947337015	0.928683957	0.882746864	0.813095144	0.732973728	0.659604514	0.606009839	0.574126909	0.552560426	0.520333421	0.455315611	0.343838969	0.187344778	0.003074734	-0.18166915	-0.339411674	-0.452463227	-0.51884383	-0.551808972	-0.573359939	-0.604660886	-0.657508744	-0.730395407	-0.810567859	-0.88080856	-0.927631814	-0.947112551	-0.945809809	-0.936612022	-0.931709595	-0.936196443	-0.945431209
0.050458463	0.184523951	0.356107753	0.505898036	0.581390774	0.554648665	0.431805051	0.251108883	0.070164813	0.053339538	0.080934236	0.006201291	0.14317455	0.314824808	0.449410698	0.500663313	0.451000174	0.317458214	0.145944889	0.004256276	0.080506912	0.054617807	0.067562476	0.248006838	0.4291949	0.553357381	0.581804233	0.507832959	0.35887511	0.18716242	0.052059265	1.37E-05	-0.048880349	-0.18189567	-0.353334499	-0.503942976	-0.580949599	-0.555913894	-0.434399517	-0.254210861	-0.072782724	-0.052035265	-0.081333818	-0.008126074	-0.14041024	-0.312181338	-0.447798609	-0.500635931	-0.45256689	-0.320081308
0.057186962	0.207392443	0.393868849	0.54400815	0.594718262	0.516089481	0.332362003	0.206081952	0.377359762	0.574559426	0.66927848	0.645809175	0.545559153	0.44801966	0.412552135	0.412484914	0.412431152	0.446897755	0.543716989	0.644616118	0.66979844	0.577047052	0.380991127	0.206767597	0.329020903	0.513784162	0.594494004	0.545761751	0.396793311	0.210317687	0.05899613	1.56E-05	-0.055403113	-0.20447712	-0.390934599	-0.542227606	-0.594907308	-0.518365094	-0.335707216	-0.20551169	-0.373726682	-0.572043063	-0.668726153	-0.646981058	-0.547402247	-0.449160583	-0.412682515	-0.412482823	-0.412319266	-0.445794954
0.097967609	0.194992693	0.290141792	0.382499497	0.471177254	0.555321913	0.634123934	0.706825181	0.77272621	0.831193	0.881663054	0.923650812	0.956752317	0.980649106	0.995111274	0.999999683	0.995267302	0.980959662	0.957214412	0.924260001	0.882413476	0.832077435	0.773736149	0.707950909	0.635354619	0.556645715	0.472581438	0.383970553	0.291665567	0.196554527	0.099552477	0.001592653	-0.096382494	-0.193430364	-0.288617281	-0.381027471	-0.469771875	-0.553996702	-0.632891641	-0.705697661	-0.77171431	-0.830306456	-0.880910396	-0.92303928	-0.956287795	-0.980336063	-0.994952721	-0.999997146	-0.995420806	-0.981267729
0.097967609	0.194992693	0.290141792	0.382499497	0.471177254	0.555321913	0.634123934	0.706825181	0.77272621	0.831193	0.881663054	0.923650812	0.956752317	0.980649106	0.995111274	0.999999683	0.995267302	0.980959662	0.957214412	0.924260001	0.882413476	0.832077435	0.773736149	0.707950909	0.635354619	0.556645715	0.472581438	0.383970553	0.291665567	0.196554527	0.099552477	0.001592653	-0.096382494	-0.193430364	-0.288617281	-0.381027471	-0.469771875	-0.553996702	-0.632891641	-0.705697661	-0.77171431	-0.830306456	-0.880910396	-0.92303928	-0.956287795	-0.980336063	-0.994952721	-0.999997146	-0.995420806	-0.981267729
0.068614382	0.249035873	0.473801419	0.656981384	0.725243695	0.648753852	0.476259747	0.409074432	0.596418438	0.821784116	0.947512426	0.952134342	0.884943644	0.825791931	0.813760348	0.818795194	0.813834396	0.825227329	0.88371563	0.951411472	0.948501131	0.824796134	0.600370428	0.410399129	0.473505099	0.64643747	0.725155176	0.659161738	0.477339271	0.252553408	0.070785632	1.87E-05	-0.066473556	-0.245530448	-0.470252331	-0.654769793	-0.725292476	-0.651041696	-0.479038469	-0.407832725	-0.592471651	-0.818743578	-0.946490255	-0.952837472	-0.886174762	-0.826370941	-0.813690586	-0.818791041	-0.813912501	-0.824677112
0.098113406	0.195575643	0.291448599	0.384806477	0.47474469	0.560388581	0.640901889	0.715494871	0.78343202	0.844039283	0.896710722	0.940914551	0.976198481	1.002194328	1.018621837	1.025291675	1.022107564	1.009067543	0.986264317	0.953884713	0.912208228	0.861604685	0.802531009	0.735527165	0.661211278	0.580273981	0.493472051	0.401621383	0.30558936	0.20628671	0.104658904	0.001677188	-0.101670672	-0.204389839	-0.305487963	-0.403984758	-0.498921497	-0.589370341	-0.674443413	-0.753301522	-0.82516245	-0.889308731	-0.945094832	-0.991953672	-1.029402407	-1.057047428	-1.074588513	-1.081822092	-1.078643593	-1.065048833
0.050443121	0.184470707	0.356015567	0.505793205	0.581322996	0.554678486	0.431986768	0.251474526	0.070714519	0.052637567	0.080134176	0.00536371	0.143999808	0.315611226	0.450159104	0.50139614	0.451748105	0.318243937	0.146769653	0.003418547	0.079705767	0.053913771	0.068114986	0.24837556	0.429379424	0.553389274	0.581737548	0.507728282	0.358782435	0.18710848	0.052043444	1.37E-05	-0.048865479	-0.18184312	-0.353242809	-0.503838004	-0.580880743	-0.555941656	-0.434578435	-0.254573426	-0.073329618	-0.051335375	-0.080534861	-0.007288655	-0.141235983	-0.312968451	-0.448547496	-0.501368767	-0.453314352	-0.320866337
0.097967609	0.194992693	0.290141792	0.382499497	0.471177254	0.555321913	0.634123934	0.706825181	0.77272621	0.831193	0.881663054	0.923650812	0.956752317	0.980649106	0.995111274	0.999999683	0.995267302	0.980959662	0.957214412	0.924260001	0.882413476	0.832077435	0.773736149	0.707950909	0.348042119	0.556645715	0.472581438	0.383970553	0.291665567	0.196554527	0.099552477	0.001592653	-0.096382494	-0.193430364	-0.288617281	-0.381027471	-0.469771875	-0.553996702	-0.632891641	-0.705697661	-0.77171431	-0.830306456	-0.880910396	-0.92303928	-0.956287795	-0.980336063	-0.994952721	-0.999997146	-0.995420806	-0.981267729
0.098159859	0.195757843	0.291849015	0.385499035	0.475793265	0.561845728	0.642807838	0.717876804	0.786303634	0.847400656	0.900548471	0.945202284	0.980897527	1.007254736	1.023983611	1.030886225	1.02785935	1.014895859	0.992085195	0.9596129	0.917759193	0.866896618	0.807486771	0.740076137	0.665291084	0.583832037	0.496466908	0.404023834	0.307383284	0.207469631	0.105242247	0.001686226	-0.102197192	-0.205400379	-0.306919194	-0.405762842	-0.500963651	-0.591586649	-0.676738846	-0.755578148	-0.82732178	-0.89125416	-0.94673413	-0.993201475	-1.030182659	-1.057295715	-1.074254254	-1.080870522	-1.077057502	-1.062830016
0.097967609	0.194992693	0.290141792	0.382499497	0.471177254	0.555321913	0.634123934	0.706825181	0.77272621	0.831193	0.881663054	0.923650812	0.956752317	0.980649106	0.995111274	0.999999683	0.995267302	0.980959662	0.957214412	0.924260001	0.882413476	0.832077435	0.773736149	0.707950909	0.287967119	0.556645715	0.472581438	0.383970553	0.291665567	0.196554527	0.099552477	0.001592653	-0.096382494	-0.193430364	-0.288617281	-0.381027471	-0.469771875	-0.553996702	-0.632891641	-0.705697661	-0.77171431	-0.830306456	-0.880910396	-0.92303928	-0.956287795	-0.980336063	-0.994952721	-0.999997146	-0.995420806	-0.981267729
0.051413457	0.187822546	0.361757655	0.512154235	0.585010808	0.551701773	0.418773601	0.225919711	0.032809091	0.100803653	0.134997031	0.062930764	0.087030316	0.261024861	0.397960869	0.450183228	0.399579883	0.263700932	0.089829397	0.06099902	0.134643957	0.102219709	0.030021203	0.222614317	0.415977619	0.550272228	0.585349487	0.51407545	0.364553521	0.190503683	0.053043988	1.40E-05	-0.049805998	-0.185151606	-0.358955426	-0.510212009	-0.584643352	-0.553104313	-0.421553336	-0.229225036	-0.035613109	-0.099360646	-0.135321302	-0.064841402	-0.084237733	-0.258338719	-0.396318858	-0.45015532	-0.401175749	-0.266366677
0.097967609	0.194992693	0.290141792	0.382499497	0.471177254	0.555321913	0.634123934	0.706825181	0.77272621	0.831193	0.881663054	0.923650812	0.956752317	0.980649106	0.995111274	0.999999683	0.995267302	0.980959662	0.957214412	0.924260001	0.882413476	0.832077435	0.773736149	0.707950909	0.635354619	0.556645715	0.472581438	0.383970553	0.291665567	0.196554527	0.099552477	0.001592653	-0.096382494	-0.193430364	-0.288617281	-0.381027471	-0.469771875	-0.553996702	-0.632891641	-0.705697661	-0.77171431	-0.830306456	-0.880910396	-0.92303928	-0.956287795	-0.980336063	-0.994952721	-0.999997146	-0.995420806	-0.981267729
0.097967609	0.194992693	0.290141792	0.382499497	0.471177254	0.555321913	0.634123934	0.706825181	0.77272621	0.831193	0.881663054	0.923650812	0.956752317	0.980649106	0.995111274	0.999999683	0.995267302	0.980959662	0.957214412	0.924260001	0.882413476	0.832077435	0.773736149	0.707950909	0.635354619	0.556645715	0.472581438	0.383970553	0.291665567	0.196554527	0.099552477	0.001592653	-0.096382494	-0.193430364	-0.288617281	-0.381027471	-0.469771875	-0.553996702	-0.632891641	-0.705697661	-0.77171431	-0.830306456	-0.880910396	-0.92303928	-0.956287795	-0.980336063	-0.994952721	-0.999997146	-0.995420806	-0.981267729
0.097967609	0.194992693	0.290141792	0.382499497	0.471177254	0.555321913	0.634123934	0.706825181	0.77272621	0.831193	0.881663054	0.923650812	0.956752317	0.980649106	0.995111274	0.999999683	0.995267302	0.980959662	0.957214412	0.924260001	0.882413476	0.832077435	0.773736149	0.707950909	0.635354619	0.556645715	0.472581438	0.383970553	0.291665567	0.196554527	0.099552477	0.001592653	-0.096382494	-0.193430364	-0.288617281	-0.381027471	-0.469771875	-0.553996702	-0.632891641	-0.705697661	-0.77171431	-0.830306456	-0.880910396	-0.92303928	-0.956287795	-0.980336063	-0.994952721	-0.999997146	-0.995420806	-0.981267729
0.097967609	0.194992693	0.290141792	0.382499497	0.471177254	0.555321913	0.634123934	0.706825181	0.77272621	0.831193	0.881663054	0.923650812	0.956752317	0.980649106	0.995111274	0.999999683	0.995267302	0.980959662	0.957214412	0.924260001	0.882413476	0.832077435	0.773736149	0.707950909	0.635354619	0.556645715	0.472581438	0.383970553	0.291665567	0.196554527	0.099552477	0.001592653	-0.096382494	-0.193430364	-0.288617281	-0.381027471	-0.469771875	-0.553996702	-0.632891641	-0.705697661	-0.77171431	-0.830306456	-0.880910396	-0.92303928	-0.956287795	-0.980336063	-0.994952721	-0.999997146	-0.995420806	-0.981267729
0.064010697	0.232263217	0.441623837	0.611554838	0.672907741	0.596027649	0.421193514	0.338092891	0.51489515	0.727126498	0.840668374	0.835862326	0.759559131	0.69105341	0.673233396	0.676718774	0.673253405	0.690356526	0.75817435	0.834997219	0.841485269	0.729919719	0.518659368	0.339192467	0.418282637	0.59372945	0.672768682	0.613564854	0.444915157	0.235542292	0.066036088	1.74E-05	-0.062013673	-0.228995374	-0.438321875	-0.609515339	-0.673008952	-0.598297156	-0.424122909	-0.337080955	-0.511134683	-0.724305155	-0.839818847	-0.836707734	-0.760946789	-0.691765775	-0.673218826	-0.676715342	-0.673278616	-0.68967512
0.097967609	0.194992693	0.290141792	0.382499497	0.471177254	0.555321913	0.634123934	0.706825181	0.77272621	0.831193	0.881663054	0.923650812	0.956752317	0.980649106	0.995111274	0.999999683	0.995267302	0.980959662	0.957214412	0.924260001	0.882413476	0.832077435	0.773736149	0.707950909	0.635354619	0.556645715	0.472581438	0.383970553	0.291665567	0.196554527	0.099552477	0.001592653	-0.096382494	-0.193430364	-0.288617281	-0.381027471	-0.469771875	-0.553996702	-0.632891641	-0.705697661	-0.77171431	-0.830306456	-0.880910396	-0.92303928	-0.956287795	-0.980336063	-0.994952721	-0.999997146	-0.995420806	-0.981267729
0.097967609	0.194992693	0.290141792	0.382499497	0.471177254	0.555321913	0.634123934	0.706825181	0.77272621	0.831193	0.881663054	0.923650812	0.956752317	0.980649106	0.995111274	0.999999683	0.995267302	0.980959662	0.957214412	0.924260001	0.882413476	0.832077435	0.773736149	0.707950909	0.635354619	0.556645715	0.472581438	0.383970553	0.291665567	0.196554527	0.099552477	0.001592653	-0.096382494	-0.193430364	-0.288617281	-0.381027471	-0.469771875	-0.553996702	-0.632891641	-0.705697661	-0.77171431	-0.830306456	-0.880910396	-0.92303928	-0.956287795	-0.980336063	-0.994952721	-0.999997146	-0.995420806	-0.981267729
0.067435351	0.244740725	0.46556319	0.645356715	0.711866781	0.6353256	0.462428298	0.391674045	0.576119032	0.798003918	0.920644122	0.923007083	0.85378793	0.792614932	0.779299301	0.783966658	0.77936085	0.792021619	0.852525857	0.922251491	0.921590321	0.800959453	0.580019285	0.392943469	0.459640102	0.63301525	0.711765757	0.647493616	0.469037967	0.248197206	0.069569246	1.83E-05	-0.065331352	-0.241296131	-0.462077331	-0.64318903	-0.711928557	-0.637607403	-0.465239306	-0.390488401	-0.572223677	-0.79502	-0.919664702	-0.923742987	-0.855053075	-0.793222871	-0.779242286	-0.783962682	-0.779426705	-0.791442914
0.097967609	0.194992693	0.290141792	0.382499497	0.471177254	0.555321913	0.634123934	0.706825181	0.77272621	0.831193	0.881663054	0.923650812	0.956752317	0.980649106	0.995111274	0.999999683	0.995267302	0.980959662	0.957214412	0.924260001	0.882413476	0.832077435	0.773736149	0.707950909	0.322317119	0.556645715	0.472581438	0.383970553	0.291665567	0.196554527	0.099552477	0.001592653	-0.096382494	-0.193430364	-0.288617281	-0.381027471	-0.469771875	-0.553996702	-0.632891641	-0.705697661	-0.77171431	-0.830306456	-0.880910396	-0.92303928	-0.956287795	-0.980336063	-0.994952721	-0.999997146	-0.995420806	-0.981267729
0.171746989	0.320026162	0.429822648	0.499543159	0.540521029	0.57142305	0.610074779	0.666239751	0.738346304	0.815323027	0.882419529	0.928179865	0.949352299	0.951601335	0.94591036	0.942580638	0.945815628	0.95154013	0.949514395	0.92871555	0.883354055	0.816529897	0.73959563	0.667302363	0.61083523	0.571948215	0.541049121	0.500392974	0.431259074	0.322139103	0.174396967	0.002856088	-0.169090633	-0.317902771	-0.428375365	-0.498685602	-0.539990304	-0.570900117	-0.609319206	-0.665181559	-0.737098345	-0.814113475	-0.881479188	-0.927637494	-0.949185094	-0.951660464	-0.946005858	-0.942582562	-0.945721698	-0.951476904
0.097967609	0.194992693	0.290141792	0.382499497	0.471177254	0.555321913	0.634123934	0.706825181	0.77272621	0.831193	0.881663054	0.923650812	0.956752317	0.980649106	0.995111274	0.999999683	0.995267302	0.980959662	0.957214412	0.924260001	0.882413476	0.832077435	0.773736149	0.707950909	1.106404619	0.556645715	0.472581438	0.383970553	0.291665567	0.196554527	0.099552477	0.001592653	-0.096382494	-0.193430364	-0.288617281	-0.381027471	-0.469771875	-0.553996702	-0.632891641	-0.705697661	-0.77171431	-0.830306456	-0.880910396	-0.92303928	-0.956287795	-0.980336063	-0.994952721	-0.999997146	-0.995420806	-0.981267729
0.097967609	0.194992693	0.290141792	0.382499497	0.471177254	0.555321913	0.634123934	0.706825181	0.77272621	0.831193	0.881663054	0.923650812	0.956752317	0.980649106	0.995111274	0.999999683	0.995267302	0.980959662	0.957214412	0.924260001	0.882413476	0.832077435	0.773736149	0.707950909	1.107642119	0.556645715	0.472581438	0.383970553	0.291665567	0.196554527	0.099552477	0.001592653	-0.096382494	-0.193430364	-0.288617281	-0.381027471	-0.469771875	-0.553996702	-0.632891641	-0.705697661	-0.77171431	-0.830306456	-0.880910396	-0.92303928	-0.956287795	-0.980336063	-0.994952721	-0.999997146	-0.995420806	-0.981267729
0.097967609	0.194992693	0.290141792	0.382499497	0.471177254	0.555321913	0.634123934	0.706825181	0.77272621	0.831193	0.881663054	0.923650812	0.956752317	0.980649106	0.995111274	0.999999683	0.995267302	0.980959662	0.957214412	0.924260001	0.882413476	0.832077435	0.773736149	0.707950909	0.315154619	0.556645715	0.472581438	0.383970553	0.291665567	0.196554527	0.099552477	0.001592653	-0.096382494	-0.193430364	-0.288617281	-0.381027471	-0.469771875	-0.553996702	-0.632891641	-0.705697661	-0.77171431	-0.830306456	-0.880910396	-0.92303928	-0.956287795	-0.980336063	-0.994952721	-0.999997146	-0.995420806	-0.981267729
0.098159859	0.195757843	0.291849015	0.385499035	0.475793265	0.561845728	0.642807838	0.717876804	0.786303634	0.847400656	0.900548471	0.945202284	0.980897527	1.007254736	1.023983611	1.030886225	1.02785935	1.014895859	0.992085195	0.9596129	0.917759193	0.866896618	0.807486771	0.740076137	0.665291084	0.583832037	0.496466908	0.404023834	0.307383284	0.207469631	0.105242247	0.001686226	-0.102197192	-0.205400379	-0.306919194	-0.405762842	-0.500963651	-0.591586649	-0.676738846	-0.755578148	-0.82732178	-0.89125416	-0.94673413	-0.993201475	-1.030182659	-1.057295715	-1.074254254	-1.080870522	-1.077057502	-1.062830016
0.17814582	0.330858485	0.441894657	0.509602261	0.546381563	0.572603153	0.607719148	0.662411588	0.73503298	0.813601325	0.882128322	0.928200869	0.948318874	0.948669087	0.941213543	0.937164667	0.941096865	0.948575315	0.948454602	0.928729892	0.883078611	0.814835975	0.736302787	0.663468237	0.608438065	0.573058086	0.546832632	0.510397267	0.443322843	0.333018887	0.180888105	0.002965699	-0.175396621	-0.328686765	-0.44045473	-0.508798924	-0.545927737	-0.57215077	-0.607005676	-0.661359903	-0.733764831	-0.812363944	-0.881171907	-0.927664781	-0.948177803	-0.948760822	-0.941331276	-0.937166982	-0.94098128	-0.948479561
0.097967609	0.194992693	0.290141792	0.382499497	0.471177254	0.555321913	0.634123934	0.706825181	0.77272621	0.831193	0.881663054	0.923650812	0.956752317	0.980649106	0.995111274	0.999999683	0.995267302	0.980959662	0.957214412	0.924260001	0.882413476	0.832077435	0.773736149	0.707950909	0.635354619	0.556645715	0.472581438	0.383970553	0.291665567	0.196554527	0.099552477	0.001592653	-0.096382494	-0.193430364	-0.288617281	-0.381027471	-0.469771875	-0.553996702	-0.632891641	-0.705697661	-0.77171431	-0.830306456	-0.880910396	-0.92303928	-0.956287795	-0.980336063	-0.994952721	-0.999997146	-0.995420806	-0.981267729
0.097967609	0.194992693	0.290141792	0.382499497	0.471177254	0.555321913	0.634123934	0.706825181	0.77272621	0.831193	0.881663054	0.923650812	0.956752317	0.980649106	0.995111274	0.999999683	0.995267302	0.980959662	0.957214412	0.924260001	0.882413476	0.832077435	0.773736149	0.707950909	0.635354619	0.556645715	0.472581438	0.383970553	0.291665567	0.196554527	0.099552477	0.001592653	-0.096382494	-0.193430364	-0.288617281	-0.381027471	-0.469771875	-0.553996702	-0.632891641	-0.705697661	-0.77171431	-0.830306456	-0.880910396	-0.92303928	-0.956287795	-0.980336063	-0.994952721	-0.999997146	-0.995420806	-0.981267729
0.097967609	0.194992693	0.290141792	0.382499497	0.471177254	0.555321913	0.634123934	0.706825181	0.77272621	0.831193	0.881663054	0.923650812	0.956752317	0.980649106	0.995111274	0.999999683	0.995267302	0.980959662	0.957214412	0.924260001	0.882413476	0.832077435	0.773736149	0.707950909	0.635354619	0.556645715	0.472581438	0.383970553	0.291665567	0.196554527	0.099552477	0.001592653	-0.096382494	-0.193430364	-0.288617281	-0.381027471	-0.469771875	-0.553996702	-0.632891641	-0.705697661	-0.77171431	-0.830306456	-0.880910396	-0.92303928	-0.956287795	-0.980336063	-0.994952721	-0.999997146	-0.995420806	-0.981267729
0.097967609	0.194992693	0.290141792	0.382499497	0.471177254	0.555321913	0.634123934	0.706825181	0.77272621	0.831193	0.881663054	0.923650812	0.956752317	0.980649106	0.995111274	0.999999683	0.995267302	0.980959662	0.957214412	0.924260001	0.882413476	0.832077435	0.773736149	0.707950909	0.635354619	0.556645715	0.472581438	0.383970553	0.291665567	0.196554527	0.099552477	0.001592653	-0.096382494	-0.193430364	-0.288617281	-0.381027471	-0.469771875	-0.553996702	-0.632891641	-0.705697661	-0.77171431	-0.830306456	-0.880910396	-0.92303928	-0.956287795	-0.980336063	-0.994952721	-0.999997146	-0.995420806	-0.981267729
0.098126236	0.195626945	0.291563604	0.3850095	0.475058638	0.560834468	0.641498376	0.716257839	0.784374174	0.845169807	0.898034977	0.942433829	0.97790982	1.004090393	1.02069086	1.027517471	1.024469614	1.011541148	0.988820824	0.956491805	0.914830285	0.8642032	0.805065071	0.737953985	0.663486766	0.582353362	0.495310508	0.403174726	0.306814709	0.207143181	0.10510829	0.001684628	-0.102136053	-0.205354316	-0.30697265	-0.406005091	-0.501486779	-0.592483362	-0.678100134	-0.757490851	-0.829866099	-0.894501166	-0.950743318	-0.998018412	-1.035836784	-1.063798333	-1.081596779	-1.089023013	-1.085967529	-1.072421903
0.097967609	0.194992693	0.290141792	0.382499497	0.471177254	0.555321913	0.634123934	0.706825181	0.77272621	0.831193	0.881663054	0.923650812	0.956752317	0.980649106	0.995111274	0.999999683	0.995267302	0.980959662	0.957214412	0.924260001	0.882413476	0.832077435	0.773736149	0.707950909	0.635354619	0.556645715	0.472581438	0.383970553	0.291665567	0.196554527	0.099552477	0.001592653	-0.096382494	-0.193430364	-0.288617281	-0.381027471	-0.469771875	-0.553996702	-0.632891641	-0.705697661	-0.77171431	-0.830306456	-0.880910396	-0.92303928	-0.956287795	-0.980336063	-0.994952721	-0.999997146	-0.995420806	-0.981267729
0.098159859	0.195757843	0.291849015	0.385499035	0.475793265	0.561845728	0.642807838	0.717876804	0.786303634	0.847400656	0.900548471	0.945202284	0.980897527	1.007254736	1.023983611	1.030886225	1.02785935	1.014895859	0.992085195	0.9596129	0.917759193	0.866896618	0.807486771	0.740076137	0.665291084	0.583832037	0.496466908	0.404023834	0.307383284	0.207469631	0.105242247	0.001686226	-0.102197192	-0.205400379	-0.306919194	-0.405762842	-0.500963651	-0.591586649	-0.676738846	-0.755578148	-0.82732178	-0.89125416	-0.94673413	-0.993201475	-1.030182659	-1.057295715	-1.074254254	-1.080870522	-1.077057502	-1.062830016
0.051346524	0.187592547	0.36136836	0.511736119	0.584802389	0.551990789	0.419817012	0.227868819	0.035664539	0.09719207	0.130885692	0.05860749	0.091326327	0.265162117	0.401934623	0.454089018	0.40355157	0.267835241	0.094123538	0.056674508	0.130526909	0.098597772	0.032890492	0.224578564	0.417034891	0.550571633	0.585146816	0.513658604	0.364162374	0.190270739	0.052974976	1.39E-05	-0.049741119	-0.184924555	-0.358568018	-0.509792688	-0.584429263	-0.55338301	-0.422582927	-0.231159004	-0.038454675	-0.095759486	-0.13121575	-0.06051943	-0.088535577	-0.262478921	-0.400294705	-0.454061146	-0.405145396	-0.27049804
0.052031473	0.189934346	0.365285368	0.51581139	0.586482446	0.548208687	0.407838977	0.206086518	0.004071127	0.136999915	0.176180409	0.106321309	0.043754029	0.219158966	0.357592581	0.41044247	0.359230647	0.221861799	0.046568915	0.10440406	0.175885098	0.138518539	0.001147082	0.202632465	0.404906642	0.54667624	0.586762986	0.517717797	0.368096867	0.192642239	0.053681177	1.41E-05	-0.050405085	-0.187236636	-0.362467162	-0.513883349	-0.586172379	-0.54971346	-0.410754672	-0.2095405	-0.007011692	-0.135453672	-0.176446167	-0.108216826	-0.040945985	-0.216446078	-0.355931277	-0.410414219	-0.360845317	-0.22455432
0.182632334	0.349174917	0.486684831	0.587821136	0.652071355	0.685487668	0.69900599	0.705740591	0.717878501	0.743887868	0.786680222	0.843142936	0.905135109	0.961691997	1.001892511	1.017681911	1.005949318	0.969338576	0.915580498	0.855500862	0.800191805	0.758051023	0.732437366	0.720549369	0.713837925	0.699887839	0.665338581	0.599153337	0.495452796	0.355229298	0.186523182	0.003009862	-0.178677155	-0.342267654	-0.475058416	-0.570278126	-0.628102358	-0.655131712	-0.662504137	-0.663118767	-0.668633412	-0.686923305	-0.720555556	-0.766579587	-0.817621749	-0.863975417	-0.896161893	-0.907347017	-0.895048606	-0.861744628
0.046172523	0.169483593	0.329421085	0.473770072	0.556132122	0.551464225	0.464408208	0.327609837	0.19059814	0.102974521	0.097577484	0.179296991	0.323309912	0.483335263	0.607133422	0.654033553	0.608589668	0.485768434	0.32592234	0.181240432	0.098237536	0.102175978	0.188662179	0.325243866	0.462465526	0.550654518	0.556780363	0.475705082	0.332031364	0.171921696	0.047639205	1.25E-05	-0.044726744	-0.167055408	-0.326806565	-0.471818242	-0.555460271	-0.552251583	-0.466337398	-0.32997575	-0.192547496	-0.103795369	-0.096941066	-0.177370454	-0.320701839	-0.480892282	-0.605656337	-0.654008526	-0.610024947	-0.488191579
0.069821338	0.253432468	0.48223304	0.668875285	0.738920133	0.66245185	0.49025234	0.426445039	0.616853152	0.845843863	0.97471224	0.981555742	0.91627083	0.858988865	0.848168755	0.853564112	0.848254894	0.85845096	0.915074358	0.980864244	0.975743564	0.848913916	0.620860013	0.42782496	0.487528297	0.660128427	0.73884413	0.67110001	0.48583542	0.257012493	0.072030825	1.90E-05	-0.067642812	-0.249864783	-0.478619266	-0.666618858	-0.738955889	-0.664746726	-0.493001666	-0.4251475	-0.612851777	-0.842745127	-0.973647181	-0.982227424	-0.917470427	-0.859540983	-0.848086672	-0.853559783	-0.84834486	-0.857927243
0.097967609	0.194992693	0.290141792	0.382499497	0.471177254	0.555321913	0.634123934	0.706825181	0.77272621	0.831193	0.881663054	0.923650812	0.956752317	0.980649106	0.995111274	0.999999683	0.995267302	0.980959662	0.957214412	0.924260001	0.882413476	0.832077435	0.773736149	0.707950909	0.635354619	0.556645715	0.472581438	0.383970553	0.291665567	0.196554527	0.099552477	0.001592653	-0.096382494	-0.193430364	-0.288617281	-0.381027471	-0.469771875	-0.553996702	-0.632891641	-0.705697661	-0.77171431	-0.830306456	-0.880910396	-0.92303928	-0.956287795	-0.980336063	-0.994952721	-0.999997146	-0.995420806	-0.981267729
0.098159859	0.195757843	0.291849015	0.385499035	0.475793265	0.561845728	0.642807838	0.717876804	0.786303634	0.847400656	0.900548471	0.945202284	0.980897527	1.007254736	1.023983611	1.030886225	1.02785935	1.014895859	0.992085195	0.9596129	0.917759193	0.866896618	0.807486771	0.740076137	0.665291084	0.583832037	0.496466908	0.404023834	0.307383284	0.207469631	0.105242247	0.001686226	-0.102197192	-0.205400379	-0.306919194	-0.405762842	-0.500963651	-0.591586649	-0.676738846	-0.755578148	-0.82732178	-0.89125416	-0.94673413	-0.993201475	-1.030182659	-1.057295715	-1.074254254	-1.080870522	-1.077057502	-1.062830016
0.097967609	0.194992693	0.290141792	0.382499497	0.471177254	0.555321913	0.634123934	0.706825181	0.77272621	0.831193	0.881663054	0.923650812	0.956752317	0.980649106	0.995111274	0.999999683	0.995267302	0.980959662	0.957214412	0.924260001	0.882413476	0.832077435	0.773736149	0.707950909	0.910429619	0.556645715	0.472581438	0.383970553	0.291665567	0.196554527	0.099552477	0.001592653	-0.096382494	-0.193430364	-0.288617281	-0.381027471	-0.469771875	-0.553996702	-0.632891641	-0.705697661	-0.77171431	-0.830306456	-0.880910396	-0.92303928	-0.956287795	-0.980336063	-0.994952721	-0.999997146	-0.995420806	-0.981267729
0.098159859	0.195757843	0.291849015	0.385499035	0.475793265	0.561845728	0.642807838	0.717876804	0.786303634	0.847400656	0.900548471	0.945202284	0.980897527	1.007254736	1.023983611	1.030886225	1.02785935	1.014895859	0.992085195	0.9596129	0.917759193	0.866896618	0.807486771	0.740076137	0.665291084	0.583832037	0.496466908	0.404023834	0.307383284	0.207469631	0.105242247	0.001686226	-0.102197192	-0.205400379	-0.306919194	-0.405762842	-0.500963651	-0.591586649	-0.676738846	-0.755578148	-0.82732178	-0.89125416	-0.94673413	-0.993201475	-1.030182659	-1.057295715	-1.074254254	-1.080870522	-1.077057502	-1.062830016
0.097967609	0.194992693	0.290141792	0.382499497	0.471177254	0.555321913	0.634123934	0.706825181	0.77272621	0.831193	0.881663054	0.923650812	0.956752317	0.980649106	0.995111274	0.999999683	0.995267302	0.980959662	0.957214412	0.924260001	0.882413476	0.832077435	0.773736149	0.707950909	0.635354619	0.556645715	0.472581438	0.383970553	0.291665567	0.196554527	0.099552477	0.001592653	-0.096382494	-0.193430364	-0.288617281	-0.381027471	-0.469771875	-0.553996702	-0.632891641	-0.705697661	-0.77171431	-0.830306456	-0.880910396	-0.92303928	-0.956287795	-0.980336063	-0.994952721	-0.999997146	-0.995420806	-0.981267729
0.06760534	0.245360004	0.466751059	0.647033098	0.713796489	0.637264634	0.46443294	0.394211266	0.579067663	0.801450307	0.924537056	0.927231515	0.858315891	0.797447446	0.784323778	0.789045149	0.784387176	0.796858451	0.857058945	0.926480778	0.925489439	0.804413971	0.582975248	0.395488747	0.46164982	0.634953468	0.713697285	0.649176271	0.470234932	0.248825287	0.069744621	1.84E-05	-0.065496031	-0.241906638	-0.463256081	-0.644859076	-0.713856375	-0.639547254	-0.467239058	-0.393017438	-0.575165021	-0.798458242	-0.923551416	-0.927962559	-0.859575913	-0.798051034	-0.784264877	-0.789041147	-0.784454842	-0.79628403
0.098159859	0.195757843	0.291849015	0.385499035	0.475793265	0.561845728	0.642807838	0.717876804	0.786303634	0.847400656	0.900548471	0.945202284	0.980897527	1.007254736	1.023983611	1.030886225	1.02785935	1.014895859	0.992085195	0.9596129	0.917759193	0.866896618	0.807486771	0.740076137	0.665291084	0.583832037	0.496466908	0.404023834	0.307383284	0.207469631	0.105242247	0.001686226	-0.102197192	-0.205400379	-0.306919194	-0.405762842	-0.500963651	-0.591586649	-0.676738846	-0.755578148	-0.82732178	-0.89125416	-0.94673413	-0.993201475	-1.030182659	-1.057295715	-1.074254254	-1.080870522	-1.077057502	-1.062830016
0.098159859	0.195757843	0.291849015	0.385499035	0.475793265	0.561845728	0.642807838	0.717876804	0.786303634	0.847400656	0.900548471	0.945202284	0.980897527	1.007254736	1.023983611	1.030886225	1.02785935	1.014895859	0.992085195	0.9596129	0.917759193	0.866896618	0.807486771	0.740076137	0.665291084	0.583832037	0.496466908	0.404023834	0.307383284	0.207469631	0.105242247	0.001686226	-0.102197192	-0.205400379	-0.306919194	-0.405762842	-0.500963651	-0.591586649	-0.676738846	-0.755578148	-0.82732178	-0.89125416	-0.94673413	-0.993201475	-1.030182659	-1.057295715	-1.074254254	-1.080870522	-1.077057502	-1.062830016
0.097967609	0.194992693	0.290141792	0.382499497	0.471177254	0.555321913	0.634123934	0.706825181	0.77272621	0.831193	0.881663054	0.923650812	0.956752317	0.980649106	0.995111274	0.999999683	0.995267302	0.980959662	0.957214412	0.924260001	0.882413476	0.832077435	0.773736149	0.707950909	0.493654619	0.556645715	0.472581438	0.383970553	0.291665567	0.196554527	0.099552477	0.001592653	-0.096382494	-0.193430364	-0.288617281	-0.381027471	-0.469771875	-0.553996702	-0.632891641	-0.705697661	-0.77171431	-0.830306456	-0.880910396	-0.92303928	-0.956287795	-0.980336063	-0.994952721	-0.999997146	-0.995420806	-0.981267729
0.198732148	0.378421601	0.523781656	0.626211859	0.685261523	0.708314112	0.708579836	0.701865116	0.702864072	0.721824537	0.762352512	0.820852047	0.887711864	0.949934568	0.994557379	1.012019495	0.998640159	0.957585019	0.898067858	0.83297202	0.775473705	0.735507996	0.716971226	0.716383717	0.723384339	0.722978951	0.699029749	0.638160733	0.533143843	0.384948777	0.202957151	0.003279533	-0.194436631	-0.370968572	-0.511339663	-0.607640069	-0.660236515	-0.677148062	-0.67179209	-0.659670215	-0.654784543	-0.666604938	-0.698249115	-0.746233871	-0.801783301	-0.853325374	-0.889550488	-0.90229767	-0.888594023	-0.851381732
0.097967609	0.194992693	0.290141792	0.382499497	0.471177254	0.555321913	0.634123934	0.706825181	0.77272621	0.831193	0.881663054	0.923650812	0.956752317	0.980649106	0.995111274	0.999999683	0.995267302	0.980959662	0.957214412	0.924260001	0.882413476	0.832077435	0.773736149	0.707950909	0.635354619	0.556645715	0.472581438	0.383970553	0.291665567	0.196554527	0.099552477	0.001592653	-0.096382494	-0.193430364	-0.288617281	-0.381027471	-0.469771875	-0.553996702	-0.632891641	-0.705697661	-0.77171431	-0.830306456	-0.880910396	-0.92303928	-0.956287795	-0.980336063	-0.994952721	-0.999997146	-0.995420806	-0.981267729
0.097967609	0.194992693	0.290141792	0.382499497	0.471177254	0.555321913	0.634123934	0.706825181	0.77272621	0.831193	0.881663054	0.923650812	0.956752317	0.980649106	0.995111274	0.999999683	0.995267302	0.980959662	0.957214412	0.924260001	0.882413476	0.832077435	0.773736149	0.707950909	1.128529619	0.556645715	0.472581438	0.383970553	0.291665567	0.196554527	0.099552477	0.001592653	-0.096382494	-0.193430364	-0.288617281	-0.381027471	-0.469771875	-0.553996702	-0.632891641	-0.705697661	-0.77171431	-0.830306456	-0.880910396	-0.92303928	-0.956287795	-0.980336063	-0.994952721	-0.999997146	-0.995420806	-0.981267729
0.047163219	0.172981392	0.335709056	0.481559836	0.562779147	0.553672434	0.459193763	0.313205176	0.166995724	0.071929163	0.062066486	0.142617918	0.288115961	0.450927444	0.577240771	0.62514701	0.578727873	0.453407685	0.290767485	0.144567206	0.062681758	0.07103217	0.164920655	0.310684899	0.457111733	0.552763874	0.563382163	0.483500336	0.338358257	0.175466605	0.048660965	1.28E-05	-0.045686793	-0.170506179	-0.33305527	-0.479601802	-0.56215163	-0.554557839	-0.461261822	-0.315725393	-0.169084664	-0.072849267	-0.061475737	-0.140686249	-0.285469141	-0.448437314	-0.575732415	-0.62512144	-0.580193588	-0.455877814
0.097967609	0.194992693	0.290141792	0.382499497	0.471177254	0.555321913	0.634123934	0.706825181	0.77272621	0.831193	0.881663054	0.923650812	0.956752317	0.980649106	0.995111274	0.999999683	0.995267302	0.980959662	0.957214412	0.924260001	0.882413476	0.832077435	0.773736149	0.707950909	0.635354619	0.556645715	0.472581438	0.383970553	0.291665567	0.196554527	0.099552477	0.001592653	-0.096382494	-0.193430364	-0.288617281	-0.381027471	-0.469771875	-0.553996702	-0.632891641	-0.705697661	-0.77171431	-0.830306456	-0.880910396	-0.92303928	-0.956287795	-0.980336063	-0.994952721	-0.999997146	-0.995420806	-0.981267729
0.097967609	0.194992693	0.290141792	0.382499497	0.471177254	0.555321913	0.634123934	0.706825181	0.77272621	0.831193	0.881663054	0.923650812	0.956752317	0.980649106	0.995111274	0.999999683	0.995267302	0.980959662	0.957214412	0.924260001	0.882413476	0.832077435	0.773736149	0.707950909	0.635354619	0.556645715	0.472581438	0.383970553	0.291665567	0.196554527	0.099552477	0.001592653	-0.096382494	-0.193430364	-0.288617281	-0.381027471	-0.469771875	-0.553996702	-0.632891641	-0.705697661	-0.77171431	-0.830306456	-0.880910396	-0.92303928	-0.956287795	-0.980336063	-0.994952721	-0.999997146	-0.995420806	-0.981267729
0.040858525	0.150606548	0.2950451	0.430013756	0.516088888	0.531627474	0.479773107	0.387075897	0.294203341	0.241883462	0.256827511	0.342386408	0.477100556	0.621643721	0.731833591	0.773336889	0.733124007	0.623820147	0.479489201	0.344268711	0.257678809	0.24154547	0.292932523	0.385451627	0.478496766	0.531280346	0.516930605	0.431889396	0.297432419	0.152787635	0.042158246	1.11E-05	-0.039577442	-0.148434829	-0.292655178	-0.428124826	-0.515228018	-0.531956311	-0.481038364	-0.38870012	-0.295485165	-0.24223971	-0.255995386	-0.340517466	-0.474714613	-0.619458019	-0.730524591	-0.773314772	-0.734395729	-0.625987114
0.097967609	0.194992693	0.290141792	0.382499497	0.471177254	0.555321913	0.634123934	0.706825181	0.77272621	0.831193	0.881663054	0.923650812	0.956752317	0.980649106	0.995111274	0.999999683	0.995267302	0.980959662	0.957214412	0.924260001	0.882413476	0.832077435	0.773736149	0.707950909	0.635354619	0.556645715	0.472581438	0.383970553	0.291665567	0.196554527	0.099552477	0.001592653	-0.096382494	-0.193430364	-0.288617281	-0.381027471	-0.469771875	-0.553996702	-0.632891641	-0.705697661	-0.77171431	-0.830306456	-0.880910396	-0.92303928	-0.956287795	-0.980336063	-0.994952721	-0.999997146	-0.995420806	-0.981267729
0.039953334	0.147377167	0.289111557	0.422323044	0.508740086	0.527287412	0.480874637	0.395065042	0.309086273	0.262224566	0.280199166	0.366120335	0.499090264	0.64093153	0.748789264	0.789373241	0.750051393	0.643063708	0.501439096	0.367988644	0.281077156	0.261956905	0.307919013	0.393556774	0.479702049	0.527010943	0.509608855	0.424184974	0.29145919	0.149513954	0.041224575	1.08E-05	-0.038700344	-0.145249641	-0.286761574	-0.420448392	-0.507852886	-0.527546247	-0.482036532	-0.396573263	-0.310264151	-0.262509826	-0.279339628	-0.364264819	-0.496743877	-0.638790178	-0.747508938	-0.789351619	-0.751295218	-0.645186538
0.097967609	0.194992693	0.290141792	0.382499497	0.471177254	0.555321913	0.634123934	0.706825181	0.77272621	0.831193	0.881663054	0.923650812	0.956752317	0.980649106	0.995111274	0.999999683	0.995267302	0.980959662	0.957214412	0.924260001	0.882413476	0.832077435	0.773736149	0.707950909	0.236329619	0.556645715	0.472581438	0.383970553	0.291665567	0.196554527	0.099552477	0.001592653	-0.096382494	-0.193430364	-0.288617281	-0.381027471	-0.469771875	-0.553996702	-0.632891641	-0.705697661	-0.77171431	-0.830306456	-0.880910396	-0.92303928	-0.956287795	-0.980336063	-0.994952721	-0.999997146	-0.995420806	-0.981267729
0.098151547	0.19572815	0.291790474	0.385410008	0.47567797	0.561714078	0.642675077	0.717762958	0.786232779	0.847400013	0.900647358	0.945430936	0.981285812	1.007830796	1.024772461	1.03190834	1.029129274	1.016420875	0.993864093	0.961634865	0.920002865	0.86932934	0.810064062	0.742741419	0.667975666	0.586455396	0.498937267	0.406239035	0.309231978	0.208832757	0.105994802	0.001699303	-0.103054118	-0.207256958	-0.30990152	-0.409990638	-0.50654736	-0.598624476	-0.685313817	-0.765755219	-0.839145075	-0.904744379	-0.961886191	-1.009982439	-1.048529999	-1.07711597	-1.095422117	-1.103228403	-1.100415595	-1.086966897
0.098159859	0.195757843	0.291849015	0.385499035	0.475793265	0.561845728	0.642807838	0.717876804	0.786303634	0.847400656	0.900548471	0.945202284	0.980897527	1.007254736	1.023983611	1.030886225	1.02785935	1.014895859	0.992085195	0.9596129	0.917759193	0.866896618	0.807486771	0.740076137	0.665291084	0.583832037	0.496466908	0.404023834	0.307383284	0.207469631	0.105242247	0.001686226	-0.102197192	-0.205400379	-0.306919194	-0.405762842	-0.500963651	-0.591586649	-0.676738846	-0.755578148	-0.82732178	-0.89125416	-0.94673413	-0.993201475	-1.030182659	-1.057295715	-1.074254254	-1.080870522	-1.077057502	-1.062830016
0.228506831	0.432463317	0.592211722	0.696803706	0.745906094	0.749388597	0.724707193	0.692693701	0.672722252	0.678363322	0.714520532	0.776697749	0.852541584	0.925263162	0.978091121	0.998655242	0.98221188	0.932900451	0.862701616	0.788337404	0.726871788	0.691107231	0.685941401	0.706627267	0.739420485	0.764512439	0.760580587	0.709881446	0.602667435	0.439863023	0.233349549	0.003778389	-0.223582153	-0.424002872	-0.578267763	-0.67634501	-0.718960173	-0.716780961	-0.687479634	-0.651415234	-0.626965281	-0.626576027	-0.654393297	-0.705940603	-0.769825921	-0.830996753	-0.874727275	-0.890380764	-0.874068567	-0.829598826
0.098159859	0.195757843	0.291849015	0.385499035	0.475793265	0.561845728	0.642807838	0.717876804	0.786303634	0.847400656	0.900548471	0.945202284	0.980897527	1.007254736	1.023983611	1.030886225	1.02785935	1.014895859	0.992085195	0.9596129	0.917759193	0.866896618	0.807486771	0.740076137	0.665291084	0.583832037	0.496466908	0.404023834	0.307383284	0.207469631	0.105242247	0.001686226	-0.102197192	-0.205400379	-0.306919194	-0.405762842	-0.500963651	-0.591586649	-0.676738846	-0.755578148	-0.82732178	-0.89125416	-0.94673413	-0.993201475	-1.030182659	-1.057295715	-1.074254254	-1.080870522	-1.077057502	-1.062830016
0.209690927	0.398319208	0.548994974	0.652256483	0.707695797	0.723607728	0.714759045	0.698798616	0.692136371	0.706238232	0.74518575	0.805052634	0.875221876	0.941305582	0.988944246	1.007546763	0.993042556	0.948954324	0.885510469	0.817002032	0.758030959	0.719583965	0.705924804	0.713109354	0.729536221	0.738446206	0.721800707	0.664622632	0.558760477	0.405167809	0.214143326	0.00346312	-0.205163804	-0.390495096	-0.535999193	-0.632987783	-0.68195884	-0.691902366	-0.67779571	-0.656921445	-0.64488592	-0.652250268	-0.68250909	-0.731814873	-0.790432348	-0.845513198	-0.884495111	-0.898309286	-0.883647046	-0.843768148
0.097967609	0.194992693	0.290141792	0.382499497	0.471177254	0.555321913	0.634123934	0.706825181	0.77272621	0.831193	0.881663054	0.923650812	0.956752317	0.980649106	0.995111274	0.999999683	0.995267302	0.980959662	0.957214412	0.924260001	0.882413476	0.832077435	0.773736149	0.707950909	0.515442119	0.556645715	0.472581438	0.383970553	0.291665567	0.196554527	0.099552477	0.001592653	-0.096382494	-0.193430364	-0.288617281	-0.381027471	-0.469771875	-0.553996702	-0.632891641	-0.705697661	-0.77171431	-0.830306456	-0.880910396	-0.92303928	-0.956287795	-0.980336063	-0.994952721	-0.999997146	-0.995420806	-0.981267729
0.098098487	0.195515992	0.291314878	0.384570412	0.474379647	0.559870128	0.640208326	0.714607734	0.782336534	0.84272477	0.895170949	0.939148016	0.974208626	0.999989684	1.016216087	1.022703638	1.019361098	1.006191366	0.983291746	0.950853324	0.90915944	0.858583269	0.799584536	0.732705387	0.65856546	0.577856187	0.491334391	0.399815238	0.304164589	0.205290851	0.104136382	0.001668538	-0.101129552	-0.203268396	-0.303761648	-0.401635623	-0.495938722	-0.585750685	-0.670191572	-0.748430393	-0.819693297	-0.883271244	-0.938527073	-0.984901914	-1.021920856	-1.049197834	-1.066439673	-1.073449244	-1.070127709	-1.056475819
0.059967881	0.217529799	0.413340703	0.571571333	0.626686023	0.548971791	0.369911836	0.266025167	0.436742045	0.639025193	0.741540133	0.726637525	0.638483289	0.556576876	0.530756195	0.532467896	0.530709207	0.555688841	0.636880538	0.725602925	0.742189382	0.641632837	0.440392151	0.266897592	0.366787255	0.546675386	0.626498223	0.573430087	0.416414911	0.220599304	0.061865172	1.63E-05	-0.058097152	-0.214470751	-0.410256363	-0.569684611	-0.626837566	-0.55123905	-0.373047867	-0.265250794	-0.433093364	-0.636389323	-0.740858612	-0.727651913	-0.64008825	-0.557482061	-0.530810341	-0.532465196	-0.530669115	-0.554817987
0.097967609	0.194992693	0.290141792	0.382499497	0.471177254	0.555321913	0.634123934	0.706825181	0.77272621	0.831193	0.881663054	0.923650812	0.956752317	0.980649106	0.995111274	0.999999683	0.995267302	0.980959662	0.957214412	0.924260001	0.882413476	0.832077435	0.773736149	0.707950909	0.635354619	0.556645715	0.472581438	0.383970553	0.291665567	0.196554527	0.099552477	0.001592653	-0.096382494	-0.193430364	-0.288617281	-0.381027471	-0.469771875	-0.553996702	-0.632891641	-0.705697661	-0.77171431	-0.830306456	-0.880910396	-0.92303928	-0.956287795	-0.980336063	-0.994952721	-0.999997146	-0.995420806	-0.981267729
0.097967609	0.194992693	0.290141792	0.382499497	0.471177254	0.555321913	0.634123934	0.706825181	0.77272621	0.831193	0.881663054	0.923650812	0.956752317	0.980649106	0.995111274	0.999999683	0.995267302	0.980959662	0.957214412	0.924260001	0.882413476	0.832077435	0.773736149	0.707950909	0.635354619	0.556645715	0.472581438	0.383970553	0.291665567	0.196554527	0.099552477	0.001592653	-0.096382494	-0.193430364	-0.288617281	-0.381027471	-0.469771875	-0.553996702	-0.632891641	-0.705697661	-0.77171431	-0.830306456	-0.880910396	-0.92303928	-0.956287795	-0.980336063	-0.994952721	-0.999997146	-0.995420806	-0.981267729
0.022429603	0.084434609	0.171855715	0.266167998	0.350299861	0.413817735	0.455752315	0.484141061	0.512471089	0.554252899	0.617586096	0.701580941	0.795873391	0.883427031	0.945704831	0.968490919	0.946418158	0.884686904	0.797399586	0.703068626	0.618800447	0.555097958	0.513010058	0.484561674	0.456289443	0.414659848	0.351511384	0.267654257	0.173382791	0.08569787	0.023148239	6.03E-06	-0.021721596	-0.083178144	-0.170330422	-0.264678903	-0.349082689	-0.412969728	-0.455211492	-0.483720433	-0.511935788	-0.553413726	-0.616377406	-0.700096123	-0.794345456	-0.882160401	-0.944980897	-0.968478859	-0.947120834	-0.885939943
0.22794146	0.415089232	0.535599398	0.587362449	0.591120667	0.580564843	0.587863458	0.630880056	0.707375962	0.798252746	0.877846873	0.926264419	0.93806487	0.923518002	0.902236266	0.892554778	0.901947683	0.923168943	0.937993439	0.926739986	0.878918666	0.799702533	0.708803572	0.631887525	0.588254908	0.58046778	0.590966468	0.58772567	0.536959708	0.417617074	0.231401688	0.003818887	-0.224470138	-0.412543284	-0.534220448	-0.586986283	-0.591271134	-0.580666945	-0.587481888	-0.629881799	-0.705952291	-0.796799849	-0.876766526	-0.925778836	-0.938129142	-0.923865319	-0.902528162	-0.892560151	-0.901662474	-0.922818235
0.097967609	0.194992693	0.290141792	0.382499497	0.471177254	0.555321913	0.634123934	0.706825181	0.77272621	0.831193	0.881663054	0.923650812	0.956752317	0.980649106	0.995111274	0.999999683	0.995267302	0.980959662	0.957214412	0.924260001	0.882413476	0.832077435	0.773736149	0.707950909	0.635354619	0.556645715	0.472581438	0.383970553	0.291665567	0.196554527	0.099552477	0.001592653	-0.096382494	-0.193430364	-0.288617281	-0.381027471	-0.469771875	-0.553996702	-0.632891641	-0.705697661	-0.77171431	-0.830306456	-0.880910396	-0.92303928	-0.956287795	-0.980336063	-0.994952721	-0.999997146	-0.995420806	-0.981267729
0.097967609	0.194992693	0.290141792	0.382499497	0.471177254	0.555321913	0.634123934	0.706825181	0.77272621	0.831193	0.881663054	0.923650812	0.956752317	0.980649106	0.995111274	0.999999683	0.995267302	0.980959662	0.957214412	0.924260001	0.882413476	0.832077435	0.773736149	0.707950909	0.635354619	0.556645715	0.472581438	0.383970553	0.291665567	0.196554527	0.099552477	0.001592653	-0.096382494	-0.193430364	-0.288617281	-0.381027471	-0.469771875	-0.553996702	-0.632891641	-0.705697661	-0.77171431	-0.830306456	-0.880910396	-0.92303928	-0.956287795	-0.980336063	-0.994952721	-0.999997146	-0.995420806	-0.981267729
0.097967609	0.194992693	0.290141792	0.382499497	0.471177254	0.555321913	0.634123934	0.706825181	0.77272621	0.831193	0.881663054	0.923650812	0.956752317	0.980649106	0.995111274	0.999999683	0.995267302	0.980959662	0.957214412	0.924260001	0.882413476	0.832077435	0.773736149	0.707950909	0.238017119	0.556645715	0.472581438	0.383970553	0.291665567	0.196554527	0.099552477	0.001592653	-0.096382494	-0.193430364	-0.288617281	-0.381027471	-0.469771875	-0.553996702	-0.632891641	-0.705697661	-0.77171431	-0.830306456	-0.880910396	-0.92303928	-0.956287795	-0.980336063	-0.994952721	-0.999997146	-0.995420806	-0.981267729
0.026153285	0.097860321	0.197057676	0.300220282	0.385903798	0.441455203	0.466651536	0.473065412	0.479398183	0.504381785	0.559670151	0.645144626	0.748243749	0.847570358	0.919585295	0.946153395	0.920415383	0.849017472	0.749950962	0.646726325	0.560834621	0.505020188	0.479610335	0.473114082	0.46686114	0.442089476	0.387064152	0.301799567	0.198765374	0.099311106	0.026989495	7.04E-06	-0.025329335	-0.096416902	-0.195350975	-0.298636189	-0.38473522	-0.440812662	-0.46643682	-0.47301672	-0.479191109	-0.503751636	-0.55851392	-0.643567774	-0.746535592	-0.846115925	-0.918742977	-0.946139306	-0.921233181	-0.85045717
0.053139395	0.192632953	0.365498384	0.503784714	0.54787977	0.467275184	0.272617408	0.060671776	0.275933025	0.472108726	0.555156859	0.514801289	0.383181589	0.226372193	0.131789613	0.12141895	0.131149734	0.224093821	0.38062167	0.513254341	0.555454213	0.474447811	0.279784076	0.060949639	0.268769012	0.464936936	0.547597108	0.505383302	0.368204185	0.195348042	0.054820288	1.45E-05	-0.051482011	-0.189927	-0.362783283	-0.502160646	-0.548128649	-0.469582385	-0.276450217	-0.060733243	-0.272066547	-0.469738837	-0.554826041	-0.516323446	-0.385734351	-0.22866743	-0.132456727	-0.121418338	-0.130536658	-0.221832744
0.097967609	0.194992693	0.290141792	0.382499497	0.471177254	0.555321913	0.634123934	0.706825181	0.77272621	0.831193	0.881663054	0.923650812	0.956752317	0.980649106	0.995111274	0.999999683	0.995267302	0.980959662	0.957214412	0.924260001	0.882413476	0.832077435	0.773736149	0.707950909	0.635354619	0.556645715	0.472581438	0.383970553	0.291665567	0.196554527	0.099552477	0.001592653	-0.096382494	-0.193430364	-0.288617281	-0.381027471	-0.469771875	-0.553996702	-0.632891641	-0.705697661	-0.77171431	-0.830306456	-0.880910396	-0.92303928	-0.956287795	-0.980336063	-0.994952721	-0.999997146	-0.995420806	-0.981267729
0.097967609	0.194992693	0.290141792	0.382499497	0.471177254	0.555321913	0.634123934	0.706825181	0.77272621	0.831193	0.881663054	0.923650812	0.956752317	0.980649106	0.995111274	0.999999683	0.995267302	0.980959662	0.957214412	0.924260001	0.882413476	0.832077435	0.773736149	0.707950909	1.096879619	0.556645715	0.472581438	0.383970553	0.291665567	0.196554527	0.099552477	0.001592653	-0.096382494	-0.193430364	-0.288617281	-0.381027471	-0.469771875	-0.553996702	-0.632891641	-0.705697661	-0.77171431	-0.830306456	-0.880910396	-0.92303928	-0.956287795	-0.980336063	-0.994952721	-0.999997146	-0.995420806	-0.981267729
0.098159859	0.195757843	0.291849015	0.385499035	0.475793265	0.561845728	0.642807838	0.717876804	0.786303634	0.847400656	0.900548471	0.945202284	0.980897527	1.007254736	1.023983611	1.030886225	1.02785935	1.014895859	0.992085195	0.9596129	0.917759193	0.866896618	0.807486771	0.740076137	0.665291084	0.583832037	0.496466908	0.404023834	0.307383284	0.207469631	0.105242247	0.001686226	-0.102197192	-0.205400379	-0.306919194	-0.405762842	-0.500963651	-0.591586649	-0.676738846	-0.755578148	-0.82732178	-0.89125416	-0.94673413	-0.993201475	-1.030182659	-1.057295715	-1.074254254	-1.080870522	-1.077057502	-1.062830016
0.098159859	0.195757843	0.291849015	0.385499035	0.475793265	0.561845728	0.642807838	0.717876804	0.786303634	0.847400656	0.900548471	0.945202284	0.980897527	1.007254736	1.023983611	1.030886225	1.02785935	1.014895859	0.992085195	0.9596129	0.917759193	0.866896618	0.807486771	0.740076137	0.665291084	0.583832037	0.496466908	0.404023834	0.307383284	0.207469631	0.105242247	0.001686226	-0.102197192	-0.205400379	-0.306919194	-0.405762842	-0.500963651	-0.591586649	-0.676738846	-0.755578148	-0.82732178	-0.89125416	-0.94673413	-0.993201475	-1.030182659	-1.057295715	-1.074254254	-1.080870522	-1.077057502	-1.062830016
0.098159859	0.195757843	0.291849015	0.385499035	0.475793265	0.561845728	0.642807838	0.717876804	0.786303634	0.847400656	0.900548471	0.945202284	0.980897527	1.007254736	1.023983611	1.030886225	1.02785935	1.014895859	0.992085195	0.9596129	0.917759193	0.866896618	0.807486771	0.740076137	0.665291084	0.583832037	0.496466908	0.404023834	0.307383284	0.207469631	0.105242247	0.001686226	-0.102197192	-0.205400379	-0.306919194	-0.405762842	-0.500963651	-0.591586649	-0.676738846	-0.755578148	-0.82732178	-0.89125416	-0.94673413	-0.993201475	-1.030182659	-1.057295715	-1.074254254	-1.080870522	-1.077057502	-1.062830016
0.098159859	0.195757843	0.291849015	0.385499035	0.475793265	0.561845728	0.642807838	0.717876804	0.786303634	0.847400656	0.900548471	0.945202284	0.980897527	1.007254736	1.023983611	1.030886225	1.02785935	1.014895859	0.992085195	0.9596129	0.917759193	0.866896618	0.807486771	0.740076137	0.665291084	0.583832037	0.496466908	0.404023834	0.307383284	0.207469631	0.105242247	0.001686226	-0.102197192	-0.205400379	-0.306919194	-0.405762842	-0.500963651	-0.591586649	-0.676738846	-0.755578148	-0.82732178	-0.89125416	-0.94673413	-0.993201475	-1.030182659	-1.057295715	-1.074254254	-1.080870522	-1.077057502	-1.062830016
0.0981578	0.195753149	0.291846516	0.385508941	0.475830957	0.561931359	0.642965745	0.718134752	0.78669189	0.847950917	0.901292668	0.94617128	0.982119748	1.008754749	1.025780696	1.03299297	1.030280301	1.017626263	0.995109879	0.962905302	0.921280594	0.870595597	0.811298911	0.743924008	0.669084511	0.587468679	0.499833147	0.406995979	0.309829091	0.209250115	0.106213788	0.001702929	-0.103280898	-0.207726948	-0.310625008	-0.410975147	-0.507797423	-0.600141451	-0.687095737	-0.767796679	-0.841437163	-0.907274653	-0.964638698	-1.012937788	-1.051665471	-1.080405687	-1.098837246	-1.106737412	-1.10398455	-1.090559794
0.098159859	0.195757843	0.291849015	0.385499035	0.475793265	0.561845728	0.642807838	0.717876804	0.786303634	0.847400656	0.900548471	0.945202284	0.980897527	1.007254736	1.023983611	1.030886225	1.02785935	1.014895859	0.992085195	0.9596129	0.917759193	0.866896618	0.807486771	0.740076137	0.665291084	0.583832037	0.496466908	0.404023834	0.307383284	0.207469631	0.105242247	0.001686226	-0.102197192	-0.205400379	-0.306919194	-0.405762842	-0.500963651	-0.591586649	-0.676738846	-0.755578148	-0.82732178	-0.89125416	-0.94673413	-0.993201475	-1.030182659	-1.057295715	-1.074254254	-1.080870522	-1.077057502	-1.062830016
0.097967609	0.194992693	0.290141792	0.382499497	0.471177254	0.555321913	0.634123934	0.706825181	0.77272621	0.831193	0.881663054	0.923650812	0.956752317	0.980649106	0.995111274	0.999999683	0.995267302	0.980959662	0.957214412	0.924260001	0.882413476	0.832077435	0.773736149	0.707950909	0.635354619	0.556645715	0.472581438	0.383970553	0.291665567	0.196554527	0.099552477	0.001592653	-0.096382494	-0.193430364	-0.288617281	-0.381027471	-0.469771875	-0.553996702	-0.632891641	-0.705697661	-0.77171431	-0.830306456	-0.880910396	-0.92303928	-0.956287795	-0.980336063	-0.994952721	-0.999997146	-0.995420806	-0.981267729
0.097967609	0.194992693	0.290141792	0.382499497	0.471177254	0.555321913	0.634123934	0.706825181	0.77272621	0.831193	0.881663054	0.923650812	0.956752317	0.980649106	0.995111274	0.999999683	0.995267302	0.980959662	0.957214412	0.924260001	0.882413476	0.832077435	0.773736149	0.707950909	0.635354619	0.556645715	0.472581438	0.383970553	0.291665567	0.196554527	0.099552477	0.001592653	-0.096382494	-0.193430364	-0.288617281	-0.381027471	-0.469771875	-0.553996702	-0.632891641	-0.705697661	-0.77171431	-0.830306456	-0.880910396	-0.92303928	-0.956287795	-0.980336063	-0.994952721	-0.999997146	-0.995420806	-0.981267729
0.097967609	0.194992693	0.290141792	0.382499497	0.471177254	0.555321913	0.634123934	0.706825181	0.77272621	0.831193	0.881663054	0.923650812	0.956752317	0.980649106	0.995111274	0.999999683	0.995267302	0.980959662	0.957214412	0.924260001	0.882413476	0.832077435	0.773736149	0.707950909	0.635354619	0.556645715	0.472581438	0.383970553	0.291665567	0.196554527	0.099552477	0.001592653	-0.096382494	-0.193430364	-0.288617281	-0.381027471	-0.469771875	-0.553996702	-0.632891641	-0.705697661	-0.77171431	-0.830306456	-0.880910396	-0.92303928	-0.956287795	-0.980336063	-0.994952721	-0.999997146	-0.995420806	-0.981267729
0.097967609	0.194992693	0.290141792	0.382499497	0.471177254	0.555321913	0.634123934	0.706825181	0.77272621	0.831193	0.881663054	0.923650812	0.956752317	0.980649106	0.995111274	0.999999683	0.995267302	0.980959662	0.957214412	0.924260001	0.882413476	0.832077435	0.773736149	0.707950909	0.635354619	0.556645715	0.472581438	0.383970553	0.291665567	0.196554527	0.099552477	0.001592653	-0.096382494	-0.193430364	-0.288617281	-0.381027471	-0.469771875	-0.553996702	-0.632891641	-0.705697661	-0.77171431	-0.830306456	-0.880910396	-0.92303928	-0.956287795	-0.980336063	-0.994952721	-0.999997146	-0.995420806	-0.981267729
0.098159859	0.195757843	0.291849015	0.385499035	0.475793265	0.561845728	0.642807838	0.717876804	0.786303634	0.847400656	0.900548471	0.945202284	0.980897527	1.007254736	1.023983611	1.030886225	1.02785935	1.014895859	0.992085195	0.9596129	0.917759193	0.866896618	0.807486771	0.740076137	0.665291084	0.583832037	0.496466908	0.404023834	0.307383284	0.207469631	0.105242247	0.001686226	-0.102197192	-0.205400379	-0.306919194	-0.405762842	-0.500963651	-0.591586649	-0.676738846	-0.755578148	-0.82732178	-0.89125416	-0.94673413	-0.993201475	-1.030182659	-1.057295715	-1.074254254	-1.080870522	-1.077057502	-1.062830016
0.097967609	0.194992693	0.290141792	0.382499497	0.471177254	0.555321913	0.634123934	0.706825181	0.77272621	0.831193	0.881663054	0.923650812	0.956752317	0.980649106	0.995111274	0.999999683	0.995267302	0.980959662	0.957214412	0.924260001	0.882413476	0.832077435	0.773736149	0.707950909	0.635354619	0.556645715	0.472581438	0.383970553	0.291665567	0.196554527	0.099552477	0.001592653	-0.096382494	-0.193430364	-0.288617281	-0.381027471	-0.469771875	-0.553996702	-0.632891641	-0.705697661	-0.77171431	-0.830306456	-0.880910396	-0.92303928	-0.956287795	-0.980336063	-0.994952721	-0.999997146	-0.995420806	-0.981267729
0.097967609	0.194992693	0.290141792	0.382499497	0.471177254	0.555321913	0.634123934	0.706825181	0.77272621	0.831193	0.881663054	0.923650812	0.956752317	0.980649106	0.995111274	0.999999683	0.995267302	0.980959662	0.957214412	0.924260001	0.882413476	0.832077435	0.773736149	0.707950909	0.635354619	0.556645715	0.472581438	0.383970553	0.291665567	0.196554527	0.099552477	0.001592653	-0.096382494	-0.193430364	-0.288617281	-0.381027471	-0.469771875	-0.553996702	-0.632891641	-0.705697661	-0.77171431	-0.830306456	-0.880910396	-0.92303928	-0.956287795	-0.980336063	-0.994952721	-0.999997146	-0.995420806	-0.981267729
0.097967609	0.194992693	0.290141792	0.382499497	0.471177254	0.555321913	0.634123934	0.706825181	0.77272621	0.831193	0.881663054	0.923650812	0.956752317	0.980649106	0.995111274	0.999999683	0.995267302	0.980959662	0.957214412	0.924260001	0.882413476	0.832077435	0.773736149	0.707950909	1.025217119	0.556645715	0.472581438	0.383970553	0.291665567	0.196554527	0.099552477	0.001592653	-0.096382494	-0.193430364	-0.288617281	-0.381027471	-0.469771875	-0.553996702	-0.632891641	-0.705697661	-0.77171431	-0.830306456	-0.880910396	-0.92303928	-0.956287795	-0.980336063	-0.994952721	-0.999997146	-0.995420806	-0.981267729
0.097967609	0.194992693	0.290141792	0.382499497	0.471177254	0.555321913	0.634123934	0.706825181	0.77272621	0.831193	0.881663054	0.923650812	0.956752317	0.980649106	0.995111274	0.999999683	0.995267302	0.980959662	0.957214412	0.924260001	0.882413476	0.832077435	0.773736149	0.707950909	0.635354619	0.556645715	0.472581438	0.383970553	0.291665567	0.196554527	0.099552477	0.001592653	-0.096382494	-0.193430364	-0.288617281	-0.381027471	-0.469771875	-0.553996702	-0.632891641	-0.705697661	-0.77171431	-0.830306456	-0.880910396	-0.92303928	-0.956287795	-0.980336063	-0.994952721	-0.999997146	-0.995420806	-0.981267729
0.097967609	0.194992693	0.290141792	0.382499497	0.471177254	0.555321913	0.634123934	0.706825181	0.77272621	0.831193	0.881663054	0.923650812	0.956752317	0.980649106	0.995111274	0.999999683	0.995267302	0.980959662	0.957214412	0.924260001	0.882413476	0.832077435	0.773736149	0.707950909	0.837042119	0.556645715	0.472581438	0.383970553	0.291665567	0.196554527	0.099552477	0.001592653	-0.096382494	-0.193430364	-0.288617281	-0.381027471	-0.469771875	-0.553996702	-0.632891641	-0.705697661	-0.77171431	-0.830306456	-0.880910396	-0.92303928	-0.956287795	-0.980336063	-0.994952721	-0.999997146	-0.995420806	-0.981267729
0.097967609	0.194992693	0.290141792	0.382499497	0.471177254	0.555321913	0.634123934	0.706825181	0.77272621	0.831193	0.881663054	0.923650812	0.956752317	0.980649106	0.995111274	0.999999683	0.995267302	0.980959662	0.957214412	0.924260001	0.882413476	0.832077435	0.773736149	0.707950909	0.635354619	0.556645715	0.472581438	0.383970553	0.291665567	0.196554527	0.099552477	0.001592653	-0.096382494	-0.193430364	-0.288617281	-0.381027471	-0.469771875	-0.553996702	-0.632891641	-0.705697661	-0.77171431	-0.830306456	-0.880910396	-0.92303928	-0.956287795	-0.980336063	-0.994952721	-0.999997146	-0.995420806	-0.981267729
0.097967609	0.194992693	0.290141792	0.382499497	0.471177254	0.555321913	0.634123934	0.706825181	0.77272621	0.831193	0.881663054	0.923650812	0.956752317	0.980649106	0.995111274	0.999999683	0.995267302	0.980959662	0.957214412	0.924260001	0.882413476	0.832077435	0.773736149	0.707950909	0.635354619	0.556645715	0.472581438	0.383970553	0.291665567	0.196554527	0.099552477	0.001592653	-0.096382494	-0.193430364	-0.288617281	-0.381027471	-0.469771875	-0.553996702	-0.632891641	-0.705697661	-0.77171431	-0.830306456	-0.880910396	-0.92303928	-0.956287795	-0.980336063	-0.994952721	-0.999997146	-0.995420806	-0.981267729
0.098159272	0.195759037	0.291859715	0.385532242	0.475866989	0.561982533	0.643034204	0.718222318	0.786800021	0.848080667	0.901444652	0.946345647	0.982316158	1.00897236	1.026018157	1.033248424	1.030551392	1.017910158	0.995403288	0.963204516	0.921581526	0.870893827	0.811589744	0.744202533	0.669345668	0.587707329	0.500044146	0.407174256	0.309969723	0.209348412	0.106265364	0.001703782	-0.103334309	-0.207837641	-0.310795405	-0.411207019	-0.508091839	-0.600498731	-0.687515417	-0.768277487	-0.841976999	-0.907870586	-0.965286972	-1.013633835	-1.052403941	-1.081180485	-1.099641581	-1.107563858	-1.104825114	-1.091405998
0.098159859	0.195757843	0.291849015	0.385499035	0.475793265	0.561845728	0.642807838	0.717876804	0.786303634	0.847400656	0.900548471	0.945202284	0.980897527	1.007254736	1.023983611	1.030886225	1.02785935	1.014895859	0.992085195	0.9596129	0.917759193	0.866896618	0.807486771	0.740076137	0.665291084	0.583832037	0.496466908	0.404023834	0.307383284	0.207469631	0.105242247	0.001686226	-0.102197192	-0.205400379	-0.306919194	-0.405762842	-0.500963651	-0.591586649	-0.676738846	-0.755578148	-0.82732178	-0.89125416	-0.94673413	-0.993201475	-1.030182659	-1.057295715	-1.074254254	-1.080870522	-1.077057502	-1.062830016
0.097967609	0.194992693	0.290141792	0.382499497	0.471177254	0.555321913	0.634123934	0.706825181	0.77272621	0.831193	0.881663054	0.923650812	0.956752317	0.980649106	0.995111274	0.999999683	0.995267302	0.980959662	0.957214412	0.924260001	0.882413476	0.832077435	0.773736149	0.707950909	0.635354619	0.556645715	0.472581438	0.383970553	0.291665567	0.196554527	0.099552477	0.001592653	-0.096382494	-0.193430364	-0.288617281	-0.381027471	-0.469771875	-0.553996702	-0.632891641	-0.705697661	-0.77171431	-0.830306456	-0.880910396	-0.92303928	-0.956287795	-0.980336063	-0.994952721	-0.999997146	-0.995420806	-0.981267729
0.097967609	0.194992693	0.290141792	0.382499497	0.471177254	0.555321913	0.634123934	0.706825181	0.77272621	0.831193	0.881663054	0.923650812	0.956752317	0.980649106	0.995111274	0.999999683	0.995267302	0.980959662	0.957214412	0.924260001	0.882413476	0.832077435	0.773736149	0.707950909	0.635354619	0.556645715	0.472581438	0.383970553	0.291665567	0.196554527	0.099552477	0.001592653	-0.096382494	-0.193430364	-0.288617281	-0.381027471	-0.469771875	-0.553996702	-0.632891641	-0.705697661	-0.77171431	-0.830306456	-0.880910396	-0.92303928	-0.956287795	-0.980336063	-0.994952721	-0.999997146	-0.995420806	-0.981267729
0.097967609	0.194992693	0.290141792	0.382499497	0.471177254	0.555321913	0.634123934	0.706825181	0.77272621	0.831193	0.881663054	0.923650812	0.956752317	0.980649106	0.995111274	0.999999683	0.995267302	0.980959662	0.957214412	0.924260001	0.882413476	0.832077435	0.773736149	0.707950909	0.635354619	0.556645715	0.472581438	0.383970553	0.291665567	0.196554527	0.099552477	0.001592653	-0.096382494	-0.193430364	-0.288617281	-0.381027471	-0.469771875	-0.553996702	-0.632891641	-0.705697661	-0.77171431	-0.830306456	-0.880910396	-0.92303928	-0.956287795	-0.980336063	-0.994952721	-0.999997146	-0.995420806	-0.981267729
0.229513789	0.417746921	0.538551138	0.58980249	0.592507815	0.580780298	0.58719167	0.629833224	0.706447589	0.797710739	0.877652406	0.926141508	0.937676033	0.922655237	0.900934156	0.891073751	0.900640111	0.922298063	0.937598003	0.926615339	0.878728002	0.799167289	0.707880135	0.630839059	0.587572655	0.580665646	0.592334331	0.590151923	0.539909195	0.420286309	0.232996675	0.003845833	-0.226019676	-0.415189211	-0.537174223	-0.589439966	-0.592677536	-0.58090007	-0.586820705	-0.628836736	-0.705019055	-0.796251068	-0.87656818	-0.925657567	-0.937746847	-0.923010678	-0.901231585	-0.891079221	-0.900349515	-0.92193925
0.067853417	0.246263749	0.468484533	0.649479333	0.716611995	0.640092569	0.467352004	0.397896298	0.583357251	0.806468876	0.930206495	0.933381133	0.864901571	0.804469356	0.791621542	0.796421094	0.791687608	0.803886551	0.863651972	0.932637395	0.93116787	0.809444412	0.587275617	0.399185482	0.464576145	0.637780179	0.716515437	0.651631654	0.47198168	0.24974188	0.070000557	1.85E-05	-0.065736359	-0.242797584	-0.464976249	-0.647296067	-0.716669132	-0.642376416	-0.470151133	-0.39669059	-0.579443895	-0.803464911	-0.929211813	-0.934105167	-0.866154253	-0.805066707	-0.791559919	-0.796417055	-0.791757889	-0.803318271
0.043145405	0.158749584	0.309947351	0.449174779	0.534056798	0.541503091	0.475272433	0.364466443	0.253469174	0.186730198	0.193525582	0.277838617	0.416777755	0.568073749	0.684139576	0.72796543	0.685501412	0.57036138	0.419265064	0.279752218	0.194302777	0.18620532	0.251925685	0.362537386	0.473722918	0.540968227	0.534823479	0.45108098	0.312432997	0.161042002	0.044517034	1.17E-05	-0.041793393	-0.156466789	-0.307458431	-0.447253817	-0.5332691	-0.542017963	-0.476809853	-0.366395448	-0.255024672	-0.187275029	-0.192769426	-0.275939852	-0.414293823	-0.565776594	-0.682758182	-0.727942062	-0.68684357	-0.572639289
0.097967609	0.194992693	0.290141792	0.382499497	0.471177254	0.555321913	0.634123934	0.706825181	0.77272621	0.831193	0.881663054	0.923650812	0.956752317	0.980649106	0.995111274	0.999999683	0.995267302	0.980959662	0.957214412	0.924260001	0.882413476	0.832077435	0.773736149	0.707950909	0.635354619	0.556645715	0.472581438	0.383970553	0.291665567	0.196554527	0.099552477	0.001592653	-0.096382494	-0.193430364	-0.288617281	-0.381027471	-0.469771875	-0.553996702	-0.632891641	-0.705697661	-0.77171431	-0.830306456	-0.880910396	-0.92303928	-0.956287795	-0.980336063	-0.994952721	-0.999997146	-0.995420806	-0.981267729
0.097967609	0.194992693	0.290141792	0.382499497	0.471177254	0.555321913	0.634123934	0.706825181	0.77272621	0.831193	0.881663054	0.923650812	0.956752317	0.980649106	0.995111274	0.999999683	0.995267302	0.980959662	0.957214412	0.924260001	0.882413476	0.832077435	0.773736149	0.707950909	0.266967119	0.556645715	0.472581438	0.383970553	0.291665567	0.196554527	0.099552477	0.001592653	-0.096382494	-0.193430364	-0.288617281	-0.381027471	-0.469771875	-0.553996702	-0.632891641	-0.705697661	-0.77171431	-0.830306456	-0.880910396	-0.92303928	-0.956287795	-0.980336063	-0.994952721	-0.999997146	-0.995420806	-0.981267729
0.097967609	0.194992693	0.290141792	0.382499497	0.471177254	0.555321913	0.634123934	0.706825181	0.77272621	0.831193	0.881663054	0.923650812	0.956752317	0.980649106	0.995111274	0.999999683	0.995267302	0.980959662	0.957214412	0.924260001	0.882413476	0.832077435	0.773736149	0.707950909	0.635354619	0.556645715	0.472581438	0.383970553	0.291665567	0.196554527	0.099552477	0.001592653	-0.096382494	-0.193430364	-0.288617281	-0.381027471	-0.469771875	-0.553996702	-0.632891641	-0.705697661	-0.77171431	-0.830306456	-0.880910396	-0.92303928	-0.956287795	-0.980336063	-0.994952721	-0.999997146	-0.995420806	-0.981267729
0.097967609	0.194992693	0.290141792	0.382499497	0.471177254	0.555321913	0.634123934	0.706825181	0.77272621	0.831193	0.881663054	0.923650812	0.956752317	0.980649106	0.995111274	0.999999683	0.995267302	0.980959662	0.957214412	0.924260001	0.882413476	0.832077435	0.773736149	0.707950909	0.948567119	0.556645715	0.472581438	0.383970553	0.291665567	0.196554527	0.099552477	0.001592653	-0.096382494	-0.193430364	-0.288617281	-0.381027471	-0.469771875	-0.553996702	-0.632891641	-0.705697661	-0.77171431	-0.830306456	-0.880910396	-0.92303928	-0.956287795	-0.980336063	-0.994952721	-0.999997146	-0.995420806	-0.981267729
0.097967609	0.194992693	0.290141792	0.382499497	0.471177254	0.555321913	0.634123934	0.706825181	0.77272621	0.831193	0.881663054	0.923650812	0.956752317	0.980649106	0.995111274	0.999999683	0.995267302	0.980959662	0.957214412	0.924260001	0.882413476	0.832077435	0.773736149	0.707950909	0.635354619	0.556645715	0.472581438	0.383970553	0.291665567	0.196554527	0.099552477	0.001592653	-0.096382494	-0.193430364	-0.288617281	-0.381027471	-0.469771875	-0.553996702	-0.632891641	-0.705697661	-0.77171431	-0.830306456	-0.880910396	-0.92303928	-0.956287795	-0.980336063	-0.994952721	-0.999997146	-0.995420806	-0.981267729
0.054371532	0.197126616	0.374138865	0.516044015	0.562181474	0.482271469	0.291620121	0.12323788	0.309507987	0.504674696	0.591312792	0.556888783	0.437680599	0.30917015	0.250409906	0.246661109	0.250114322	0.307516622	0.435423701	0.555472625	0.591683734	0.507053891	0.313236901	0.123674231	0.287960702	0.479946191	0.561917346	0.517690065	0.376911328	0.199905705	0.056091476	1.48E-05	-0.052675649	-0.194356903	-0.371356954	-0.514372044	-0.562411397	-0.48456619	-0.295271803	-0.122976405	-0.305770228	-0.502265574	-0.590908892	-0.558281714	-0.439934615	-0.310844708	-0.250721015	-0.24665986	-0.249833862	-0.305884394
0.098159859	0.195757843	0.291849015	0.385499035	0.475793265	0.561845728	0.642807838	0.717876804	0.786303634	0.847400656	0.900548471	0.945202284	0.980897527	1.007254736	1.023983611	1.030886225	1.02785935	1.014895859	0.992085195	0.9596129	0.917759193	0.866896618	0.807486771	0.740076137	0.665291084	0.583832037	0.496466908	0.404023834	0.307383284	0.207469631	0.105242247	0.001686226	-0.102197192	-0.205400379	-0.306919194	-0.405762842	-0.500963651	-0.591586649	-0.676738846	-0.755578148	-0.82732178	-0.89125416	-0.94673413	-0.993201475	-1.030182659	-1.057295715	-1.074254254	-1.080870522	-1.077057502	-1.062830016
0.097967609	0.194992693	0.290141792	0.382499497	0.471177254	0.555321913	0.634123934	0.706825181	0.77272621	0.831193	0.881663054	0.923650812	0.956752317	0.980649106	0.995111274	0.999999683	0.995267302	0.980959662	0.957214412	0.924260001	0.882413476	0.832077435	0.773736149	0.707950909	0.635354619	0.556645715	0.472581438	0.383970553	0.291665567	0.196554527	0.099552477	0.001592653	-0.096382494	-0.193430364	-0.288617281	-0.381027471	-0.469771875	-0.553996702	-0.632891641	-0.705697661	-0.77171431	-0.830306456	-0.880910396	-0.92303928	-0.956287795	-0.980336063	-0.994952721	-0.999997146	-0.995420806	-0.981267729
0.097967609	0.194992693	0.290141792	0.382499497	0.471177254	0.555321913	0.634123934	0.706825181	0.77272621	0.831193	0.881663054	0.923650812	0.956752317	0.980649106	0.995111274	0.999999683	0.995267302	0.980959662	0.957214412	0.924260001	0.882413476	0.832077435	0.773736149	0.707950909	0.635354619	0.556645715	0.472581438	0.383970553	0.291665567	0.196554527	0.099552477	0.001592653	-0.096382494	-0.193430364	-0.288617281	-0.381027471	-0.469771875	-0.553996702	-0.632891641	-0.705697661	-0.77171431	-0.830306456	-0.880910396	-0.92303928	-0.956287795	-0.980336063	-0.994952721	-0.999997146	-0.995420806	-0.981267729
0.097967609	0.194992693	0.290141792	0.382499497	0.471177254	0.555321913	0.634123934	0.706825181	0.77272621	0.831193	0.881663054	0.923650812	0.956752317	0.980649106	0.995111274	0.999999683	0.995267302	0.980959662	0.957214412	0.924260001	0.882413476	0.832077435	0.773736149	0.707950909	0.635354619	0.556645715	0.472581438	0.383970553	0.291665567	0.196554527	0.099552477	0.001592653	-0.096382494	-0.193430364	-0.288617281	-0.381027471	-0.469771875	-0.553996702	-0.632891641	-0.705697661	-0.77171431	-0.830306456	-0.880910396	-0.92303928	-0.956287795	-0.980336063	-0.994952721	-0.999997146	-0.995420806	-0.981267729
0.097967609	0.194992693	0.290141792	0.382499497	0.471177254	0.555321913	0.634123934	0.706825181	0.77272621	0.831193	0.881663054	0.923650812	0.956752317	0.980649106	0.995111274	0.999999683	0.995267302	0.980959662	0.957214412	0.924260001	0.882413476	0.832077435	0.773736149	0.707950909	0.635354619	0.556645715	0.472581438	0.383970553	0.291665567	0.196554527	0.099552477	0.001592653	-0.096382494	-0.193430364	-0.288617281	-0.381027471	-0.469771875	-0.553996702	-0.632891641	-0.705697661	-0.77171431	-0.830306456	-0.880910396	-0.92303928	-0.956287795	-0.980336063	-0.994952721	-0.999997146	-0.995420806	-0.981267729
[truncated: 633 more rows]
[truncated: 591 more columns]
